# Supplementary material for: Role of Calcium Signaling in the Transcriptional Regulation of the Apicoplast Genome of Plasmodium falciparum
Source: Biomed Res Int. 2014 Apr 27;2014:869401. doi: 10.1155/2014/869401 (PMC4022301; doi:10.1155/2014/869401)
Supplement: Supplementary file 1 — The supplementary material contains three dataset representing the three featured microarray based genomic studies: Dataset 1 (Transcriptional responses to Ionomycine DS1). This table contains results from the analysis of genome-wide gene expression responses of P. falciparum to Ionomycine and to A23187 as described in Figure 1. Briefly, P. falciparum cultures were treated by both compounds for 30 min, 1.0, 2.0, 4.0 and 6.0 hours and the cell samples were collected for total RNA isolations from both the treatment experimental courses (Inono-30 mins, Iono-1 h, e.t.c.) and untreated control cultures (ctrl-30mins, e.t.c.). The table summarizes relative mRNA levels of all P. falciparum genes determined by two channel competitive microarray hybridization were each sample was hybridized against an arbitrary RNA pool (for more details see materials and methods). Dataset 2 (CGH-DS2). This table contains results from microarray based comparative genomic hybridization (CGH) measuring the copy number of each gene in all time points from the ionophore treatment time courses as described for Dataset 1. The final findings from these the CGH experiment is featured in Figure 2 (a). Dataset 3 (Schizonts_IonomycineEGTA_DS3). This table summarizes results from genome-wide gene expression analyses of P. falciparum response to Inonomycine in the presence and absence of external calcium chelator EGTA. Briefly, the cells were treated for 30 min, 1.0, 2.0, 4.0 and 6.0 hours with Inonomycine of with Inonomycine+EGTA. Total RNA was isolated and subjected to a microarray analysis of mRNA expression levels for all P. falciparum genes using CGH as described in materials and methods. The labels of the experimental time points are analogous to the dataset 1. The findings from these experiments are described in Figure 2 (c). [file 869401.f1.zip]

Archive with 4 entries (4 files):
- 871433.xlsx
- 871434.xls
- 871435.xls
- mat.869401.v1.xlsx
