# Supplementary material for: Role of Calcium Signaling in the Transcriptional Regulation of the Apicoplast Genome of Plasmodium falciparum
Source: Biomed Res Int. 2014 Apr 27;2014:869401. doi: 10.1155/2014/869401 (PMC4022301; doi:10.1155/2014/869401)
Supplement: Supplementary file 1 — The supplementary material contains three dataset representing the three featured microarray based genomic studies: Dataset 1 (Transcriptional responses to Ionomycine DS1). This table contains results from the analysis of genome-wide gene expression responses of P. falciparum to Ionomycine and to A23187 as described in Figure 1. Briefly, P. falciparum cultures were treated by both compounds for 30 min, 1.0, 2.0, 4.0 and 6.0 hours and the cell samples were collected for total RNA isolations from both the treatment experimental courses (Inono-30 mins, Iono-1 h, e.t.c.) and untreated control cultures (ctrl-30mins, e.t.c.). The table summarizes relative mRNA levels of all P. falciparum genes determined by two channel competitive microarray hybridization were each sample was hybridized against an arbitrary RNA pool (for more details see materials and methods). Dataset 2 (CGH-DS2). This table contains results from microarray based comparative genomic hybridization (CGH) measuring the copy number of each gene in all time points from the ionophore treatment time courses as described for Dataset 1. The final findings from these the CGH experiment is featured in Figure 2 (a). Dataset 3 (Schizonts_IonomycineEGTA_DS3). This table summarizes results from genome-wide gene expression analyses of P. falciparum response to Inonomycine in the presence and absence of external calcium chelator EGTA. Briefly, the cells were treated for 30 min, 1.0, 2.0, 4.0 and 6.0 hours with Inonomycine of with Inonomycine+EGTA. Total RNA was isolated and subjected to a microarray analysis of mRNA expression levels for all P. falciparum genes using CGH as described in materials and methods. The labels of the experimental time points are analogous to the dataset 1. The findings from these experiments are described in Figure 2 (c). [file 869401.f1.zip › 871433.xlsx]

## Sheet: Sheet1
Ionomycin and A23187 treatment on Schizonts- normalised ratios
UNIQID	NAME	ctrl-30 min	ctrl-1 hour	ctrl-2 hours	ctrl- 4 hours	ctrl-6 hours	Iono-30 mins	Iono-1 hour	Iono-2 hours	Iono-4 hours	Iono-6 hours	A23-30 mins	A23-1 hour	A23-2 hours	A23-4 hours	A23-6 hours
aPFL1450c_0	aPFL1450c_0::PFL1450c::hypothetical protein	0.710425	1.25336	1.92009	2.08391	2.63093	0.647642	0.768175	1.63155	2.5793	2.96287	0.636731	0.55472	0.39098	0.40192	0.3857
aMAL8P1.96_0	aMAL8P1.96_0::MAL8P1.96::hypothetical protein	1.64087	1.55115	1.14917	0.999545	0.926943	1.46855	1.45953	1.35943	1.19417	1.42375	1.46135	1.2302	1.14171	1.21434	1.06352
aMAL13P1.295_2	aMAL13P1.295_2::MAL13P1.295::hypothetical protein	2.63891	2.14672	1.56801	1.29575	1.24663	2.39406	2.3775	1.77934	1.87106	1.98159	3.02317	2.93209	2.4685	2.59778	2.38502
aPFL0865w_0	aPFL0865w_0::PFL0865w::hypothetical protein	1.92318	1.91671	2.32453	2.01736	1.82941	1.96406	2.36598	2.78454	3.77918	3.16572	1.8841	1.65661	1.95722	2.10518	2.08278
aPF11_0363_0	aPF11_0363_0::PF11_0363::hypothetical protein	2.39768	1.99782	1.90831	1.80727	1.5602	2.14578	2.0984	2.0022	1.88816	1.59491	2.36426	2.28555	2.40141	2.54876	2.68346
aPF10_0094_0	aPF10_0094_0::PF10_0094::hypothetical protein	1.55339	1.74004	2.83105	3.40054	3.21983	1.53194	2.02926	4.17916	6.22025	5.48455	0.728066	0.549689	0.565649	0.535485	0.486867
aMAL7P1.132_0	aMAL7P1.132_0::MAL7P1.132::hypothetical protein	1.9762	1.68671	1.50649	1.26052	0.995775	2.27045	2.293	1.96466	1.73996	1.57969	1.82277	2.23146	2.15039	2.13827	2.28511
aPFE0500c_0	aPFE0500c_0::PFE0500c::hypothetical protein	2.94641	3.15896	3.17266	2.39186	2.26841	2.98571	3.48111	3.73227	3.88748	3.76413	2.46994	2.73335	2.48701	2.69703	2.99076
aPF11_0378_1	aPF11_0378_1::PF11_0378::hypothetical protein	0.516913	0.336675	0.280095	0.377113	0.524656	0.405701	0.396891	0.329594	0.293556	0.348648	0.541482	0.564783	0.573747	0.580824	0.519747
aPF14_0669_0	aPF14_0669_0::PF14_0669::hypothetical protein	0.348585	0.354453	0.348155	0.257063	0.360988	0.407814	0.362323	0.330767	0.279306	0.333434	0.519301	0.457864	0.454602	0.474217	0.531128
aMAL8P1.219_0	aMAL8P1.219_0::MAL8P1.219::	0.216043			0.233575	0.333455	0.269411	0	0.187669	0.320632	0	0.153964	0.255347	0	0	0.153015
aPFL0535c_1	aPFL0535c_1::PFL0535c::hypothetical protein	1.53749	1.94893	1.69628	1.16005	1.02943	1.67669	1.45441	1.3606	1.36518	1.04468	1.96891	1.80127	1.58127	1.61503	1.5643
aPFL1795c_1	aPFL1795c_1::PFL1795c::hypothetical protein	0.561978	0.345564	0.375641	0.52587	0.982009	0.485996	0.491632	0.365955	0.413258	0.390485	0.416224	0.467927	0.445348	0.437456	0.564007
aMAL8P1.109_0	aMAL8P1.109_0::MAL8P1.109::hypothetical protein, conserved	1.56134	1.31781	2.24861	4.73675	5.32916	1.35551	1.57348	2.20863	2.55793	2.83102	1.30608	1.18869	1.15906	1.21066	1.08375
aPFL0570c_1	aPFL0570c_1::PFL0570c::hypothetical protein	1.53351	1.25336	1.1387	0.926471	0.787749	1.18435	1.17403	1.09552	0.970445	0.869718	1.21866	1.44529	1.45981	1.32952	1.49601
aPFE1180c_2	aPFE1180c_2::PFE1180c::hypothetical protein	0.962254	0.743351	0.836358	0.875581	0.936121	0.758576	0.723365	0.903158	0.933394	0.786042	1.13385	1.28806	1.45056	1.58195	1.58959
aMAL13P1.293_0	aMAL13P1.293_0::MAL13P1.293::hypothetical protein	0.641503	0.530012	0.441084	0.519346	0.555248	0.715259	0.61582	0.502015	0.51586	0.445001	0.653693	0.597488	0.633897	0.615134	0.682879
aPF13_0165_0	aPF13_0165_0::PF13_0165::hypothetical protein	0.862848	0.637793	0.569352	0.581981	0.536893	0.73322	0.784819	0.728391	0.651238	0.680814	0.696751	0.694344	0.739161	0.764629	0.78531
aPFL0620c_1	aPFL0620c_1::PFL0620c::choline transporter	2.06235	1.44337	1.26959	1.07131	0.734212	2.2229	1.99469	1.60926	1.39368	1.10173	1.95064	1.83397	2.10412	2.07822	2.08404
aPF13_0319_0	aPF13_0319_0::PF13_0319::hypothetical protein	0.596439	0.383342	0.349464	0.29882	0.293685	0.565234	0.421216	0.460963	0.303531	0.324559	0.728066	0.758495	0.571433	0.599204	0.699318
aPFF0835w_1	aPFF0835w_1::PFF0835w::hypothetical protein	1.91258	1.50003	1.26435	1.01912	0.871877	1.41361	1.62085	1.18701	0.931969	1.09032	1.71187	1.59372	1.56277	1.66895	1.47198
aPFF0095c_1	aPFF0095c_1::PFF0095c::hypothetical protein	1.96427	1.5467	1.25257	1.2801	1.37206	1.50236	1.53635	1.48493	1.31388	1.46812	1.11558	1.09686	1.15443	1.32217	1.30885
aPFE1440c_0	aPFE1440c_0::PFE1440c::hypothetical protein	0.475825	0.518901	0.524851	0.595029	0.671498	0.417323	0.339277	0.348361	0.384758	0.508392	0.635426	0.82642	1.02025	1.13224	1.20136
aPFB0615c_1	aPFB0615c_1::PFB0615c::hypothetical protein		0.550013	0.357317	0.463236		0.526143	0	0.559489	0.450309	0.339773	0	0.523274	0.404861	0.368835	0.475486
aPF14_0170_4	aPF14_0170_4::PF14_0170::hypothetical protein	0.959603	0.904466	1.24603	1.20441	1.14568	1.07659	0.87572	1.19287	1.35235	1.27668	1.3113	1.42768	1.32563	1.30379	1.29494
aMAL13P1.380_0	aMAL13P1.380_0::MAL13P1.380::chloroquine resistance marker protein, putative	1.29759	1.43337	2.99859	3.27919	2.96744	1.18752	1.90635	3.7616	4.9192	5.72416	0.780257	0.87925	1.02141	1.05504	1.20642
aPFL1430c_0	aPFL1430c_0::PFL1430c::hypothetical protein	1.8927	1.39448	1.41487	1.13656	1.41642	1.21182	1.80009	1.33011	1.093	1.41868	1.86975	1.68051	1.51071	1.58685	1.7072
aPF14_0529_1	aPF14_0529_1::PF14_0529::gamma-adaptin, putative	1.60773	1.5767	1.23556	1.11568	0.877996	1.42524	1.48002	1.5037	1.67726	1.44023	2.31989	2.35725	2.2117	1.71796	1.78939
aPFF0275c_2	aPFF0275c_2::PFF0275c::nucleoside diphosphate kinase, putative	0.486429	0.590014	0.433231	0.428004	0.605725	0.562065	0.421216	0.548933	0.450309	0.881128	0.828533	0.977364	0.834015	0.765854	0.742314
aPF14_0714_0	aPF14_0714_0::PF14_0714::hypothetical protein, conserved	0.968881	1.0378	0.916198	1.1731	1.6841	0.910714	1.10873	0.769444	0.812267	0.886199	0.929001	1.07799	1.09313	0.976617	1.11537
aMAL13P1.258_1	aMAL13P1.258_1::MAL13P1.258::hypothetical protein	1.76678	1.44781	0.798402	0.694201	0.46806	1.70944	1.46209	1.11429	0.869268	0.655458	1.13646	1.0956	1.05033	1.08568	1.11916
aPF11_0131_0	aPF11_0131_0::PF11_0131::hypothetical protein	1.22601	0.892243	0.748665	0.595029	0.676087	0.737446	0.804023	0.74364	0.686864	0.840558	0.664131	1.12453	0.969354	1.11631	0.949707
aPF07_0035_0	aPF07_0035_0::PF07_0035::cg1 protein	2.45468	2.06783	1.70936	1.14047	0.903999	2.54408	2.73086	1.90953	1.65303	1.16639	1.65446	1.80378	1.61713	1.72409	1.8501
aMAL7P1.229_1	aMAL7P1.229_1::MAL7P1.229::	1.44471	1.58115	2.28919	2.05651	2.37701	1.47278	1.87691	2.04208	2.86431	2.24402	0.814181	0.667928	0.528633	0.410498	0.413521
aPF14_0035_2	aPF14_0035_2::PF14_0035::hypothetical protein	0.89996	0.832242	0.882168	0.762055	1.14721	0.795554	0.583813	0.810497	0.840767	0.687153	0.995545	1.02768	1.21921	1.37731	1.39358
aPF14_0715_0	aPF14_0715_0::PF14_0715::hypothetical protein	0.958278	0.826686	0.579823	0.604164	0.642436	0.948749	0.821947	0.521955	0.535811	0.701099	0.866372	0.94466	1.01331	1.06975	1.12043
aPF13_0020_1	aPF13_0020_1::PF13_0020::hypothetical protein	2.04247	1.51337	1.30755	1.11046	0.945298	1.93448	2.04847	1.56235	1.2355	1.22344	2.4321	2.62517	2.3829	2.43113	2.56585
aPF14_0266_0	aPF14_0266_0::PF14_0266::hypothetical protein		2.02894		0.959093	1.05237	1.54779	1.51459	1.52129	1.40223	1.20822	2.49473	2.23901	2.30655	2.33923	2.62276
aPFI0500w_1	aPFI0500w_1::PFI0500w::hypothetical protein	1.62099	1.29114	1.15048	1.09872	1.00801	1.51081	1.41472	1.42159	1.45495	1.28936	1.01251	1.12957	1.09891	1.06239	1.07111
aPFC0430w_1	aPFC0430w_1::PFC0430w::hypothetical protein	0.48908	0.43001	0.340302	0.301429	0.336514	0.52403	0.451943	0.418737	0.441759	0.413306	0.717627	0.711954	0.695205	0.681304	0.714493
achr11tRNALeu1_0	achr11tRNALeu1_0::chr11-tRNA-Leu-1::(tRNA) tRNA-Leu	1.60376	1.96116	1.55885	0.968228	0.867288	0	0	0.156	0.102602	0.308078	9.4766	20.1536	43.9518	30.4871	31.6249
aPFB0455w_0	aPFB0455w_0::PFB0455w::ribosomal L37ae protein, putative	0.994064	0.964467	0.691075	0.481504	0.529245	0.651869	0.87828	0.532512	0.215179	0.380343	1.08166	0.922018	0.749572	0.743798	0.720816
aMAL13P1.28_1	aMAL13P1.28_1::MAL13P1.28::hypothetical protein	1.0325	1.00891	0.757827	0.657664	0.607255	1.31008	1.03832	0	0.548636	0.56164	0.888553	1.32957	1.12899	1.04646	1.16469
aPFE1510c_1	aPFE1510c_1::PFE1510c::Phosphoenolpyruvate/phosphate translocator precursor, putative	3.08425	2.69895	2.35856		1.6841	3.79605	3.16232	2.74701	2.4653	1.86241	2.67349	2.84153	3.25624	3.03891	2.93511
aMAL13P1.308_0	aMAL13P1.308_0::MAL13P1.308::hypothetical protein, conserved	0.988763	1.32225	2.40175	4.36094	4.58883	1.10934	1.35071	2.37988	3.5811	3.26588	0.662827	0.669186	0.669757	0.590627	0.637353
aPFL1930w_4	aPFL1930w_4::PFL1930w::hypothetical protein	2.04115	1.72226	1.96328	1.2018	1.35217	1.92074	2.35574	2.14647	1.84826	1.8079	1.79015	1.73712	1.54657	1.34545	1.50992
aPF14_0506_0	aPF14_0506_0::PF14_0506::hypothetical protein	1.33735	2.20227	2.29966	1.47322	1.41948	1.66718	2.14577	2.3142	1.93804	2.2212	2.19463	2.04655	1.10007	1.09915	1.26459
aMAL13P1.92_0	aMAL13P1.92_0::MAL13P1.92::40S ribosomal protein S15, putative	0.862848	0.836686	0.575896	0.488029	0.46959	0.917053	0.751531	0.540722	0.309231	0.425984	1.0934	1.00755	0.95316	0.928828	0.885213
aPF11_0330_0	aPF11_0330_0::PF11_0330::hypothetical protein			0.278786	0.274027	0.39158	0	0	0.153654	0.143928	0.457679	0.414919	0.361008	0.316949	0.395794	0.384435
aPF13_0010_1	aPF13_0010_1::PF13_0010::Gbph2	2.92918	2.39672	1.36906	1.36622	0.968243	5.10718	3.49648	2.27432	1.91096	1.29824	1.67011	1.30441	2.1261	2.251	1.83871
aPFI1750c_0	aPFI1750c_0::PFI1750c::hypothetical protein	0.481127	0.642237	0.539248	0.40843	0.512419	0.476487	0.362323	0.491459	0.491635	0.607281	0.687617	0.667928	0.499715	0.562443	0.519747
aMAL8P1.102_1	aMAL8P1.102_1::MAL8P1.102::hypothetical protein	0.942373	0.632237	0.649192	0.511516	0.582781	0.780763	0.772016	0.478557	0.491635	0.593335	0.764599	0.716985	0.801626	0.709487	0.778987
aPF07_0096_0	aPF07_0096_0::PF07_0096::hypothetical protein	0.581859	0.610014	1.17143	1.2266	1.29558	0.645529	0.472428	0.898467	0.917719	1.26147	0.358814	0.371071	0.444191	0.556317	0.490661
aMAL13P1.348_0	aMAL13P1.348_0::MAL13P1.348::hypothetical protein	1.53749	1.51226	1.31933	1.20963	1.22216	2.04224	1.80521	1.24096	1.30675	1.15624	1.37784	1.02768	0.973981	0.88594	0.784046
aMAL7P1.115_1	aMAL7P1.115_1::MAL7P1.115::hypothetical protein	0.913214	0.963356	0.786622	0.630261	0.503241	1.03116	0.184362	0.89964	0.826517	0.773364	0.987716	1.07925	0.872187	0.927603	0.944649
aPFB0745w_1	aPFB0745w_1::PFB0745w::hypothetical protein	0.776696	0.624459	0.465952	0.400601	0.368636	0	0.468587	0.330767	0.326332	0.296668	0.773733	0.828936	0.600352	0.671501	0.840952
aMAL13P1.295_3	aMAL13P1.295_3::MAL13P1.295::hypothetical protein	1.76016	1.55115	1.4044	0.888629	1.02331	1.84784	1.88971	1.67964	1.46778	1.61899	2.31337	2.2541	1.89822	1.84663	1.87918
aPFL2540w_0	aPFL2540w_0::PFL2540w::hypothetical protein	0.723679	0.557791	0.574587	0.773799	1.28487	0.771255	0.83347	0.662707	0.607062	0.570514	0.621074	0.722017	0.734534	0.673952	0.767606
aPF07_0035_1	aPF07_0035_1::PF07_0035::cg1 protein	2.58722	2.15227	1.74732	1.34012	1.03249	2.45639	2.82688	1.91305	1.65018	1.15624	1.74449	1.7258	1.76057	1.76575	2.01576
aMAL7P1.124_0	aMAL7P1.124_0::MAL7P1.124::hypothetical protein	0.486429	0.668904	0.568043	0.579371	0.806104	0.531426	0.312391	0	0.396158	0.673207	0.422748	0.411323	0	0.379864	0.389494
aPFL1295w_1	aPFL1295w_1::PFL1295w::hypothetical protein	2.55673	2.59673	2.63603	2.09435	2.06344	2.05492	2.47352	3.28539	3.7236	3.05542	3.80995	3.88933	3.3002	3.40897	3.14377
aPFL0980w_1	aPFL0980w_1::PFL0980w::hypothetical protein	0.903936	0.951133	1.15572	1.13786	1.2864	0.817741	0.951257	1.01107	0.981845	0.955929	0.926392	0.899376	0.72181	0.836926	0.734727
aPFC0965w_2	aPFC0965w_2::PFC0965w::hypothetical protein	1.18227	1.07225	1.52351	2.00039	2.43208	0.820911	0.975583	1.12602	1.26828	1.79142	1.48614	1.63523	1.57665	1.73512	1.6819
aMAL7P1.138_0	aMAL7P1.138_0::MAL7P1.138::hypothetical protein	1.39302	1.24558	1.51827	1.29314	1.10897	1.48229	1.71559	1.6292	1.60173	1.63167	2.13853	1.9585	2.3667	2.2657	2.43939
aPFL1720w_0	aPFL1720w_0::PFL1720w::Serine hydroxymethyltransferase	2.56469	2.26339	1.94758	1.64677	1.17474	2.24086	2.53626	1.97522	1.80694	1.58349	2.00544	1.97485	1.89012	1.80129	1.62753
aMAL7P1.207_3	aMAL7P1.207_3::MAL7P1.207::	3.51501	3.1323	3.02869	2.75201	2.61869	2.74693	3.42734	3.37218	3.77063	3.6944	2.95532	2.89939	2.83403	2.81712	2.72266
aPF13_0165_1	aPF13_0165_1::PF13_0165::hypothetical protein	0.567279	0.442233	0.352082	0.262283	0.341103	0.485996	0.546685	0.314346	0.314931	0.311881	0.454062	0.56101	0.567963	0.545288	0.588034
aPFF0325c_0	aPFF0325c_0::PFF0325c::hypothetical protein, expressed	0.960929	0.783352	0.667516	0.655054	0.714327	1.01848	0.929492	0.890256	0.693989	0.716313	1.44439	1.43649	1.45403	1.45206	1.40622
achr13MALr.2_0	achr13MALr.2_0::chr13-MALr.2::(trna) anticodon	0.202789					0	0	0	0	0.280186	0.266175	0.444028	0.392137	0.44971	0.528599
aPF08_0030_1	aPF08_0030_1::PF08_0030::hypothetical protein	0.58451		0.338993		0.318159	0.293711	0.464746	0.510226	0.287856	0.457679	0.504949	0.901892	0.610762	0	0.743579
aMAL13P1.312_0	aMAL13P1.312_0::MAL13P1.312::hypothetical protein	1.55472	1.63226	1.75648	1.75116	1.56632	1.82777	1.33534	1.59636	1.43928	1.4808	1.3935	1.8629	1.79296	1.87359	1.78307
aPF13_0031_1	aPF13_0031_1::PF13_0031::hypothetical protein	1.13721	1.01113	0.764371	0.477589	0.555248	1.24774	1.25213	0.784692	0.96902	1.23611	0.73198	0.700633	0.61886	0.675177	0.670233
aPFI0235w_1	aPFI0235w_1::PFI0235w::replication factor A-related protein, putative	2.44672	2.1745	1.91747	1.42233	1.24357	2.33806	2.19058	1.98108	1.96084	1.67985	3.00099	2.44152	1.6206	1.98387	1.83113
aPF11_0127_2	aPF11_0127_2::PF11_0127::hypothetical protein	1.67268	1.43114	1.94627	2.32792	2.41525	1.6957	1.99341	2.46199	3.00824	3.33941	1.78493	1.88051	1.60904	1.76698	1.83618
aPFF0710w_0	aPFF0710w_0::PFF0710w::hypothetical protein, conserved	0.96623	1.48003	3.22109	3.48797	4.04582	0.881132	1.30334	3.18569	5.25408	4.92164	0.912039	0.787426	0.71487	0.816094	0.671497
aPFI0190w_0	aPFI0190w_0::PFI0190w::ribosomal protein L32, putative	1.45929	0.993356	0.700237	0.568932	0.642436	1.04278	1.02935	0.707279	0.359107	0.547694	1.65576	1.30567	1.08272	1.00848	1.10146
aPFC0125w_0	aPFC0125w_0::PFC0125w::ABC transporter, putative	1.59978	1.10558	0.766989	0.858617	0.812222	1.54462	1.5914	0.97588	0.943369	0.689689	1.31913	1.23397	1.27358	1.29154	1.38093
aPFC0320w_1	aPFC0320w_1::PFC0320w::hypothetical protein	2.02922	2.14561	1.72638	1.21877	1.34147	2.25671	2.10096	1.64914	1.60031	1.63547	2.80658	2.53964	2.14692	2.16032	1.92597
aMAL13P1.79_1	aMAL13P1.79_1::MAL13P1.79::hypothetical protein	1.12263	0.985579	1.10075	1.53324	1.51431	1.09138	0.974302	1.18466	1.37088	1.34641	1.15342	1.08554	1.09544	1.14082	1.04202
aMAL8P1.113_4	aMAL8P1.113_4::MAL8P1.113::hypothetical protein	2.89206	2.77784	1.57193	1.13656	1.26805	1.95455	1.88331	1.38875	1.20985	1.36163	1.56443	1.3824	1.30018	1.39447	1.41887
aPFF1020c_0	aPFF1020c_0::PFF1020c::hypothetical protein, conserved	1.1942	1.61115	2.7486	3.3353	3.29631	1.53723	1.71943	3.56924	3.70508	4.49819	0.990326	0.729564	0.908046	0.877363	0.804279
aPFC1045c_1	aPFC1045c_1::PFC1045c::hypothetical protein	0.0477151	0.0977801	0.654428	3.26614	5.02018	0.0602212	0.0857796	0.27212	0.642688	0.893806	0.0678484	0.0704407	0.0682481	0.0673952	0.07714
aPFF1565c_0	aPFF1565c_0::PFF1565c::RIFIN					0.374754	0.260959	0	0	0	0.178761	#N/A	#N/A	#N/A	#N/A	#N/A
aPF14_0531_1	aPF14_0531_1::PF14_0531::hypothetical protein	2.41889	1.98449	1.83632	1.47061	1.2604	1.91651	2.26996	1.98812	1.81834	1.6976	3.0049	3.20379	2.80395	2.74605	2.6177
aPFA0310c_0	aPFA0310c_0::PFA0310c::calcium-transporting ATPase	1.4076	1.30336	1.31147	0.825995	0.764804	1.45376	1.56452	1.32307	1.31388	1.10553	1.584	2.03649	1.81262	1.67385	1.76284
aMAL13P1.73_1	aMAL13P1.73_1::MAL13P1.73::hypothetical protein	0.865499	0.962245	0.705473	0.494553	0.497123	0.973048	1.03192	0.670918	0.682589	0.58446	1.01642	1.5585	1.60209	1.75963	1.72617
aPF11_0291_1	aPF11_0291_1::PF11_0291::hypothetical protein	1.23397	0.88002	1.03923	1.29054	1.22216	1.13786	1.23292	1.13657	1.12577	0.986356	1.42612	1.24403	1.43321	1.47167	1.33288
aMAL13P1.45_0	aMAL13P1.45_0::MAL13P1.45::hypothetical protein, conserved	1.39169	1.08003	1.01174	0.686372	0.723505	1.39777	1.53763	1.29961	1.21555	1.29443	1.6388	1.78366	1.63448	1.58685	1.71478
aPFL2015w_0	aPFL2015w_0::PFL2015w::hypothetical protein	1.39567	0.930022	1.47639	1.08436	1.05084	1.12096	1.5005	1.61396	1.23265	1.71661	1.07905	1.80378	1.90516	2.09538	2.20797
aPFB0615c_0	aPFB0615c_0::PFB0615c::hypothetical protein	1.39434	0.814463	0.328523	0.377113	0.428291	0.749068	0.521079	0.758888	0.456009	0.418377	0.64456	0.611324	0.410645	0	0.448929
aPF10_0333_1	aPF10_0333_1::PF10_0333::hypothetical protein	0.523541	0.28334	0.383495	0.390162	0.261563	0.418379	0.208688	0.476211	0.272181	0.341041	0.468415	0.534594	0.674384	0.726643	0.744843
aPF14_0555_0	aPF14_0555_0::PF14_0555::hypothetical protein	2.03584	1.88338	1.37561	1.10394	1.08755	1.58266	1.81161	1.28553	1.0531	1.03073	1.43004	1.47422	1.04801	1.01583	1.18745
aPF14_0260_0	aPF14_0260_0::PF14_0260::hypothetical protein	0.776696	0.471122	1.03792	1.52803	2.79918	0.814572	0.83219	0.923098	1.25545	1.08144	0.474939	0.486795	0.545985	0.628613	0.551361
aPFL0130c_1	aPFL0130c_1::PFL0130c::hypothetical protein, conserved	1.36253	1.20669	1.64916	1.56717	1.71775	1.26359	1.34687	1.6902	2.13327	1.99934	1.57617	1.77863	1.64374	1.68488	1.53774
aPF11_0164_0	aPF11_0164_0::PF11_0164::peptidyl-prolyl cis-trans isomerase	3.02063	2.49117	2.06668	1.60762	1.50361	2.53141	3.05094	2.61681	2.357	2.33657	2.69697	2.4063	2.2117	2.19708	2.02208
aPF13_0235_5	aPF13_0235_5::PF13_0235::hypothetical protein	0.809831	0.660015	0.66359	0.673323	0.578192	0.770198	0.888523	0.666226	0.679739	0.555301	0.575407	0.594972	0.652405	0.696008	0.775194
aPFL1875w_0	aPFL1875w_0::PFL1875w::hypothetical protein	1.17034	1.64337	1.5968	1.25661	1.0799	0.991009	1.09081	1.37937	1.16995	1.60885	1.53311	1.33963	1.23078	1.35403	1.19883
aMAL8P1.13_1	aMAL8P1.13_1::MAL8P1.13::integral membrane protein	1.59713	2.24561	3.04309	2.92034	3.08216	1.34072	1.88203	2.77751	3.10371	3.15938	0.545397	0.462896	0.421056	0.357807	0.383171
aPFF1300w_0	aPFF1300w_0::PFF1300w::pyruvate kinase, putative	1.39964	1.20336	0.755209	0.642005	0.498653	1.47067	1.34175	0.829264	0.666914	0.557836	1.36349	1.4629	1.42164	1.4925	1.26965
aMAL7P1.119_1	aMAL7P1.119_1::MAL7P1.119::hypothetical protein	1.77739	1.80893	2.88079	2.98167	3.83932	0.98784	1.88971	3.5751	3.72788	5.33368	1.00337	1.04277	0.873344	0	0.69426
aPF10_0359_0	aPF10_0359_0::PF10_0359::hypothetical protein	0.812482	0.636682	0.537939	0.661579	0.770923	0.715259	0.588934	0.513745	0.544361	0.64278	0.765904	0.711954	0.633897	0.642092	0.632295
aPFB0655c_0	aPFB0655c_0::PFB0655c::hypothetical protein	0.548723	0.377787	0.33114	0.379723	0.435939	0.451131	0.39561	0.430466	0.397583	0.453876	0.503644	0.543399	0.543671	0.60043	0.584241
aPFE1150w_2	aPFE1150w_2::PFE1150w::multidrug resistance protein	1.21939	1.09336	1.0497	1.29967	1.68716	1.59428	1.28925	1.1225	1.1044	1.0675	1.56051	1.73334	2.23599	2.17748	2.08657
aPF11_0375_1	aPF11_0375_1::PF11_0375::hypothetical protein	1.22336	0.867798	0.901801	1.07262	1.41795	1.1104	1.2278	1.12719	1.17137	1.10173	1.38698	1.26542	1.33951	1.35526	1.18745
aPF13_0310_0	aPF13_0310_0::PF13_0310::hypothetical protein	0.604391	0.480011	0.505218	0.477589	0.497123	0.671942	0.579972	0.565354	0.444609	0.481768	1.04904	1.17611	1.20996	1.30747	1.12422
aPFE0415w_0	aPFE0415w_0::PFE0415w::transcription factor iib, putative	1.75883	2.22894	1.80098	1.87252	2.00226	1.15794	1.74632	1.55765	1.57181	1.55814	0.985107	1.08806	1.15675	1.35648	1.2962
aPF11_0348_0	aPF11_0348_0::PF11_0348::hypothetical protein	1.85426	1.58115	1.7002	1.56456	1.37665	1.87108	2.06511	2.34	2.57645	2.38475	2.19855	1.91573	1.77214	1.80006	1.77169
aPF10_0220_0	aPF10_0220_0::PF10_0220::hypothetical protein	1.02057	1.46003	2.78393	4.01645	4.11618	0.937127	0.825788	1.93769	2.11617	3.06683	0.263565	0.218869	0.230193	0.210763	0.213716
aPF14_0217_1	aPF14_0217_1::PF14_0217::hypothetical protein	1.45796	1.27892	1.11645		0.959065	1.47489	1.46337	1.18466	0.903468	0.888735	2.46864	2.78618	2.49626	2.53528	2.3964
aPF13_0058_0	aPF13_0058_0::PF13_0058::hypothetical protein	0.117962	0.17556	0.954155	2.73505	5.18079	0.0971992	0.170279	0.401143	1.06877	1.28429	0.0548006	0.0566041	0.0451131	0.0453386	0.0455252
aPFA0130c_0	aPFA0130c_0::PFA0130c::Serine/Threonine protein kinase, putative	0.343284	0.308896	0.278786	0.246624	0.31204	0.264128	0.26246	0.309654	0.247955	0.343577	0.20746	0.294341	0.299597	0.294088	0.27821
aMAL13P1.164_0	aMAL13P1.164_0::MAL13P1.164::elongation factor tu, putative	1.38639	1.12447	0.912272	0.782933	0.640906	1.32381	1.14202	0.994647	0.73389	0.7759	1.18213	0.987427	0.941592	1.02196	1.06858
aPF10_0114_1	aPF10_0114_1::PF10_0114::DNA repair protein RAD23, putative	0.717052	0.702239	0.68584	0.546748	0.46959	0.909658	0.793781	0.848031	0.766666	0.6656	1.11167	1.25913	1.14634	1.0967	1.17101
aMAL8P1.98_0	aMAL8P1.98_0::MAL8P1.98::hypothetical protein	0.784648	0.737795	0.68584	0.565017	0.440527	0.592704	0.545404	0.566527	0.652663	0.508392	2.44254	2.50316	2.47313	2.44216	2.58482
aPF10_0023_0	aPF10_0023_0::PF10_0023::hypothetical protein	0.290267	0.202227	0.157063	0.169636	0.226382	0.304276	0.282945	0.209955	0.135378	0.154673	0.246603	0.223901	0.246387	0.2512	0.24533
aPFE0040c_1	aPFE0040c_1::PFE0040c::Mature parasite-infected erythrocyte surface antigen (MESA) or PfEMP2	0.262433	0.155559	0.12565	0.147452	0.163668	0.170099	0.158756	0.145444	0.0641263	0.136923	0.267479	0.26541	0.252171	0.305116	0.271887
aPF10_0040_0	aPF10_0040_0::PF10_0040::hypothetical protein	0.88538	0.887798	0.859918	0.887325	0.754097	0.875849	0.815546	0.871489	0.99467	1.07003	1.0386	0.933339	1.16137	1.21924	1.0572
aPF10_0080_0	aPF10_0080_0::PF10_0080::endonuclease, putative	2.72771	2.57562	2.34678	1.52803	1.7101	3.00155	3.21225	3.32878	1.99789	3.2177	2.00022	1.88932	2.22674	2.26325	2.30408
aPF14_0359_0	aPF14_0359_0::PF14_0359::hypothetical protein, conserved	0.955627	0.672238	0.395274	0.400601	0.367106	0.720542	0.792501	0.566527	0.408983	0.413306	0.93683	0.932081	0.998273	1.10896	1.03064
aPF14_0568_0	aPF14_0568_0::PF14_0568::hypothetical protein	0.380395	0.80113	0.431922	0.459321	0.382402	0.563121	0.546685	0.452752	0.424659	0.42852	1.42743	1.56605	1.51997	1.5991	1.69455
aPFB0195c_1	aPFB0195c_1::PFB0195c::hypothetical protein	1.28963	0.941133	0.59422	0.581981	0.5476	0.954031	0.894924	0.593504	0.460284	0.481768	1.20039	1.05787	0.839798	0.85163	0.837159
aMAL7P1.19_3	aMAL7P1.19_3::MAL7P1.19::hypothetical protein	1.47917	1.47781	1.76172	1.70027	1.75752	1.24774	1.50178	2.33179	2.97974	3.08839	1.5305	1.38617	1.3638	1.24987	1.25194
aPF13_0161_1	aPF13_0161_1::PF13_0161::hypothetical protein	0.331355	0.320007	0.608618	2.62022	4.19572	0.214472	0.300869	0.404662	0.397583	0.777167	0.290965	0.283021	0.352808	0.437456	0.483073
aPF14_0281_1	aPF14_0281_1::PF14_0281::aspartyl protease, putative	1.13058	1.13558	2.63211	2.73505	2.46573	1.05229	1.47618	2.50304	4.43327	3.84273	0.878115	0.88554	0.909203	0.934955	0.887742
aPF14_0402_1	aPF14_0402_1::PF14_0402::hypothetical protein	1.00069	0.857798	1.11645	1.05305	1.04931	1.21816	1.34303	1.9412	1.94089	2.33784	1.34131	1.54844	0	1.77188	1.88297
aPFA0705c_0	aPFA0705c_0::PFA0705c::STEVOR pseudogene	0.174955	0.317785				0.279976	0.233013	0.326075	0	0	0.277917	0.338367	0.129556	0	0.20107
aPFC1015c_2	aPFC1015c_2::PFC1015c::hypothetical protein	1.20348	0.981134	0.666207	0.546748	0.500182	1.13681	1.21372	0	0.678314	0.598406	0.778952	0.883024	0.81435	0.78546	0.867509
aPF10_0125_1	aPF10_0125_1::PF10_0125::hypothetical protein	0.913214	1.03002	0.607309	0.6407	0.715857	1.05334	0.847553	1.00872	0.896343	0.86845	1.65054	1.60253	1.42627	1.45941	1.40117
aPFA0370w_0	aPFA0370w_0::PFA0370w::hypothetical protein	1.24059	1.35781	1.38739	1.13656	1.06614	1.34811	0.96406	1.6034	1.33668	1.05482	1.64924	1.85536	1.8346	1.86256	1.67811
aPF14_0283_0	aPF14_0283_0::PF14_0283::hypothetical protein	1.06961	1.00336	0.744739	0.613298	0.539952	0	0.83219	0.738948	0.632713	0.486839	0.995545	1.07674	1.08156	0.942307	1.13687
aMAL8P1.113_7	aMAL8P1.113_7::MAL8P1.113::hypothetical protein	1.91656	1.4867	1.13478	0.756836	0.809163	1.67563	1.89355	1.33128	1.05452	1.37811	0.840276	0.84403	0.726437	0.742572	0.974999
aPFC0416w_0	aPFC0416w_0::PFC0416w::hypothetical protein	1.66473	1.80893	1.64523	0.688981	0.858111	1.43474	1.1369	1.05681	1.1386	1.20062	1.31261	1.40252	1.41586	1.27928	1.56303
aPF07_0038_0	aPF07_0038_0::PF07_0038::Cg7	2.59252	2.13005	1.73162	1.30619	1.15485	1.65344	2.14705	1.99281	1.35805	1.3312	2.77265	2.92706	2.56451	2.97274	2.63288
aPFE0500c_2	aPFE0500c_2::PFE0500c::hypothetical protein	3.0922	2.53784	2.41746	2.19482	2.09098	2.41308	2.81664	2.98746	3.11226	2.78665	2.0485	1.94341	1.83229	1.96794	1.92976
aPFL0120c_0	aPFL0120c_0::PFL0120c::cyclophilin, putative	1.10805	1.02669	1.24472	1.23573	1.50361	0.950862	1.18939	1.19756	1.52621	1.3705	0.983802	0.967301	0.865247	0.947209	1.03191
aPF08_0102_0	aPF08_0102_0::PF08_0102::asparagine-rich antigen Pfa55-14	1.36253	1.07225	0.828505		0.593488	1.27099	1.29309	1.23393	1.04882	0.977482	1.46396	1.50441	1.68538	1.74737	2.00943
aMAL13P1.43_0	aMAL13P1.43_0::MAL13P1.43::hypothetical protein	0.832363	0.638904	0.509145	0.443662	0.394639	0.79978	0.61198	0.587639	0.454584	0.41077	1.0099	1.15976	1.26317	1.39202	1.36449
aMAL7P1.76_1	aMAL7P1.76_1::MAL7P1.76::hypothetical protein	0.384371	0.308896	0.253918	0.190514	0.206497	0.450075	0.427618	0.301444	0.233705	0.226938	0.507558	0.548431	0.657032	0.643318	0.676556
aPF14_0767_0	aPF14_0767_0::PF14_0767::stevor, putative	0.239901		0.352082	0.319698	0.373225	0.315897	0.334156	0.267429	0.220879	0.282722	0.29227	0.309436	0.207058	0.180129	0.199805
aPF14_0736_1	aPF14_0736_1::PF14_0736::hypothetical protein	0.664035	0.52779	0.516998	0.593725	0.726564	0.602212	0.355921	0.609925	0.547211	0.655458	0.442319	0.411323	0.507812	0.495048	0.455252
aPF14_0341_0	aPF14_0341_0::PF14_0341::glucose-6-phosphate isomerase	0.596439	0.445566	0.441084	0.397991	0.338044	0.722655	0.660631	0.537203	0.371933	0.370201	0.589759	0.513211	0.753042	0.758502	0.803015
aPF11_0469_1	aPF11_0469_1::PF11_0469::hypothetical protein	0.831038	0.778907	0.688458	0.544139	0.569015	0.682507	0.641426	0.468	0.453159	0.55023	1.12602	1.2302	1.10354	1.20086	1.16595
aPFC0520w_0	aPFC0520w_0::PFC0520w::26S proteasome regulatory subunit S14, putative	1.55604	1.57559	2.05621	1.33621	1.23745	1.64816	1.84746	1.87552	2.5451	1.7407	1.76797	1.90316	1.51187	1.41652	1.4644
aMAL13P1.295_0	aMAL13P1.295_0::MAL13P1.295::hypothetical protein	3.04184	2.08338	1.59157	1.29314	1.22828	2.3275	2.71294	2.08078	1.93091	2.11978	2.93966	2.88429	2.4685	2.66762	2.81498
aPFD0487c_1	aPFD0487c_1::PFD0487c::	1.46724	1.44337	2.07846	1.67548	1.97931	1.79607	1.77961	1.73711	2.26722	2.3277	0.973364	0.996232	0.914987	0.805066	0.926944
aMAL7P1.77_0	aMAL7P1.77_0::MAL7P1.77::hypothetical protein	2.38841	1.7356	1.35466	0.741177	0.778571	2.33067	2.39671	1.50135	1.12435	0.907752	2.18159	2.25913	1.73512	1.58317	1.66547
aMAL8P1.72_0	aMAL8P1.72_0::MAL8P1.72::high mobility group protein, putative	3.79998	2.66451	3.88206	3.36661	2.53303	3.7147	3.83063	4.72692	2.45105	3.71595	2.33555	2.82895	3.55468	1.98877	3.2285
aPF13_0217_0	aPF13_0217_0::PF13_0217::hypothetical protein	2.63361	1.68115	1.74863	1.58935	1.1518	2.08767	1.86795	1.64445	1.1386	1.12328	1.80451	1.90693	2.14808	2.70561	2.45583
aPF14_0181_0	aPF14_0181_0::PF14_0181::calmodulin, putative	1.2777	1.20669	0.973788	0.70464	0.773982	1.17379	1.10233	0.829264	0.769516	0.761954	0.981192	1.13586	0.835171	0.970491	0.976263
aPFI0415c_0	aPFI0415c_0::PFI0415c::ribosomal RNA methyltransferase, putative	0.770068	0.696683	0.481659	0.41365	0.39311	0.657151	0.39305	0.478557	0.300681	0.357522	0.842886	0.937112	0.932338	1.08813	1.00535
aPFE0230w_0	aPFE0230w_0::PFE0230w::hypothetical protein	0.550049	0.480011	0.488203	0.465845	0.631728	0.423662	0.539003	0.449233	0.50731	0.862111	0.67457	1.02768	0.95663	1.01338	1.20136
aPF11_0049_2	aPF11_0049_2::PF11_0049::hypothetical protein, conserved	1.48314	1.35336	1.18975	1.14439	1.08908	1.63971	1.64646	1.31838	1.41078	1.08905	1.38437	1.30693	1.4228	1.40917	1.47451
aPF11_0509_0	aPF11_0509_0::PF11_0509::ring-infected erythrocyte surface antigen, putative	0.0198813	0.0122225	0.0196328	0.11222	0.278389	0.0147912	0.0128029	0.0129023	0.0171003	0.026624	0.0169621	0.0125787	0.0104107	0.00612683	0.0101167
aPF11_0436_0	aPF11_0436_0::PF11_0436::hypothetical protein	1.43808	1.10669	1.08897	0.955179	1.03555	1.29951	1.35583	1.57642	1.78414	1.81424	1.44047	0	1.53038	1.78781	1.42646
aPFB0805c_0	aPFB0805c_0::PFB0805c::clathrin coat assembly protein, putative	1.31614	1.43003	1.82454	1.96647	2.14298	1.16428	1.59012	1.83916	2.4482	2.27318	1.19909	1.38114	1.21458	1.13714	1.26459
aPFE0980c_2	aPFE0980c_2::PFE0980c::hypothetical protein	1.52158	1.05336	0.920125	0.866446	0.90094	1.23929	1.2086	1.04978	0.940519	0.995231	1.65315	1.77485	1.80106	1.78168	1.77801
aPF14_0729_0	aPF14_0729_0::PF14_0729::hypothetical protein	0.298219	0.25445				0.456414	0.197165	0.256872	0.098327	0.153405	0.140916	0.280505	0.164258	0	0.24533
aMAL13P1.262_2	aMAL13P1.262_2::MAL13P1.262::hypothetical protein	1.47387	1.45114	1.02483	0.929081	0.928473	1.31325	1.34687	1.45913	1.07447	1.10299	1.77841	1.97485	1.41933	1.58808	1.69329
aPF11_0392_0	aPF11_0392_0::PF11_0392::hypothetical protein	1.87282	2.29005	2.76823	2.52496	2.62787	2.29263	2.31349	4.01026	4.04423	5.27663	2.94749	3.11574	3.48644	3.90892	3.5105
aPF14_0535_0	aPF14_0535_0::PF14_0535::hypothetical protein	0.796577	0.805574	1.02222	0.972142	1.21298	0.793441	0.681115	0.961805	1.15997	1.16131	0.734589	0.812583	0.749572	0.809968	0.825777
aPFF1595c_3	aPFF1595c_3::PFF1595c::erythrocyte membrane protein 1 (PfEMP1)	0.275687	0.245561	0.238212	0.285771	0.331925	0.376119	0	0.492632	0	0.228206	0.176145	0.249058	0.216312	0.138466	0.228891
aPF10_0140_1	aPF10_0140_1::PF10_0140::hypothetical protein	1.52556	1.67226	0.950229	0.666798	0.729623	1.103	1.5069	1.42629	1.036	1.5163	1.10384	1.67674	1.40545	1.26458	1.42772
aPF10_0132_2	aPF10_0132_2::PF10_0132::phospholipase C-like, putative	1.5123	1.8356	1.86512	2.18699	2.17052	2.14261	1.68999	2.14412	2.4368	1.922	2.00414	2.19498	2.40372	2.10028	2.49377
aMAL13P1.206_1	aMAL13P1.206_1::MAL13P1.206::phosphate transporter, putative	1.60111	1.71337	1.66486	1.99518	2.83131	1.92285	1.80137	1.58346	1.78699	1.65322	1.51224	1.59372	1.47023	1.33197	1.38599
aPF10_0183_3	aPF10_0183_3::PF10_0183::hypothetical protein	1.69654	1.76337	1.88737	1.81119	2.13075	1.3703	1.76168	1.56	1.56611	1.57589	1.4757	1.61385	1.4575	1.30257	1.3999
aMAL13P1.301_0	aMAL13P1.301_0::MAL13P1.301::guanylyl cyclase	0.314124	0.27334	0.320669	0.360149	0.434409	0.410984	0.403292	0.384722	0	0.242152	0	0.347172	0.312322	0.204636	0.331323
aPFD1070w_0	aPFD1070w_0::PFD1070w::eukaryotic initiation factor	0.629574	0.587791	0.392657	0.377113	0.669969	0.517691	0.604298	0.415218	0.367657	0.424716	0.832448	0.744658	0	0.6666	0
aPFI0660c_1	aPFI0660c_1::PFI0660c::protease, putative	1.71244	1.80004	1.44759	1.23312	1.09673	1.71155	1.83594	1.42394	1.35663	1.0751	1.59444	1.43145	1.28862	1.32095	1.26965
aPF11_0304_2	aPF11_0304_2::PF11_0304::hypothetical protein	1.47917	1.72115	1.98292	1.86469	2.25464	1.28261	1.98829	2.75639	3.33599	4.16095	1.05426	1.04403	0.920771	0.839376	0.814396
aPF10_0156_1	aPF10_0156_1::PF10_0156::hypothetical protein	0.436063	0.470011	1.32849	3.77113	5.15325	0.421549	0.466026	0.919579	1.69151	2.00568	0.473634	0.446543	0.535574	0.536711	0.527334
aMAL7P1.87_1	aMAL7P1.87_1::MAL7P1.87::hypothetical protein	2.58854	2.83673	3.32318	2.9621	3.06075	3.2118	2.47736	4.51931	4.85935	4.48298	2.24552	2.26668	2.15618	2.14684	1.85389
aPF11_0203_0	aPF11_0203_0::PF11_0203::hypothetical protein	1.21806	0.838908	0.725106	0.743787	0.714327	0.813515	0.792501	0.777655	0.628438	0.583193	2.39688	2.31196	2.34935	2.47769	2.3357
aPF13_0036_0	aPF13_0036_0::PF13_0036::DNAJ protein, putative	1.10142	0.958911	0.942376	1.05696	0.951417	1.17484	1.19323	0.998166	0.902043	0.791113	0.900296	0.888055	0.905733	0.943533	0.833365
aPFD0540c_1	aPFD0540c_1::PFD0540c::hypothetical protein	0.951651	0.808908	0.545793	0.434528	0.455823	0.843097	0.897485	0.687339	0.584262	0.593335	1.1469	1.49812	1.48873	1.45083	1.47704
aPFF1470c_1	aPFF1470c_1::PFF1470c::DNA polymerase epsilon, catalytic subunit a, putative	1.1889	1.49448	1.48555	1.35056	1.14874	1.93131	1.6759	1.66439	1.39368	1.27035	1.78754	1.13586	1.40545	1.5023	1.50739
aMAL13P1.301_1	aMAL13P1.301_1::MAL13P1.301::guanylyl cyclase	0.271711	0.150004	0.414907	0.426699	0.455823	0.246168	0.147234	0.216993	0.353407	0.442466	0.43971	0.392455	0.275306	0.420301	0.480544
aPFB0235w_0	aPFB0235w_0::PFB0235w::hypothetical protein	0.185559				0.287566	0	0	0	0.22373	0.310613	0.160488	0	0	0	0
aPFI0410c_2	aPFI0410c_2::PFI0410c::hypothetical protein	0.453293	0.785574	2.01171	2.30052	1.84318	0.533539	0.512117	1.58111	3.12509	3.86048	0.443624	0.511953	0.683638	0.425202	0.461575
aPFI0010c_0	aPFI0010c_0::PFI0010c::rifin	0.14182				0.149902	0	0	0	0.128253	0	#N/A	#N/A	#N/A	#N/A	#N/A
aPFI0695c_1	aPFI0695c_1::PFI0695c::phospholipid or glycerol acyltransferase, putative	0.819109	0.818908	1.1675	1.45626	1.50208	0.530369	0.978143	1.30196	1.76561	1.58857	0.784171	0.753464	0.81435	0.805066	0.824513
aPFD0872w_5	aPFD0872w_5::PFD0872w::	0.958278	1.30225	1.40178	1.28532	2.01908	0.742729	0.719524	1.0228	1.12862	1.55053	0.955097	0.945917	0.607292	0.632289	0.319941
aPF14_0453_0	aPF14_0453_0::PF14_0453::hypothetical protein	3.34403	2.95896	3.07581	3.01299	2.04662	4.32748	3.46831	3.66072	1.86536	2.12865	1.85278	1.76856	2.12379	1.43736	2.10807
aMAL8P1.150_1	aMAL8P1.150_1::MAL8P1.150::hypothetical protein	1.45929	1.63226	2.91351	3.24004	3.79802	1.40833	1.93196	3.42731	5.51486	5.68866	1.0373	0.857867	1.16253	1.08813	1.05214
aPFI0240c_2	aPFI0240c_2::PFI0240c::E1-E2_ATPase/hydrolase, putative	3.50176	2.26116	1.76172	1.41319	1.29405	2.66453	2.51321	2.31654	1.46778	1.68238	3.90259	3.8038	3.20766	3.35751	3.0464
aPF10_0262_2	aPF10_0262_2::PF10_0262::hypothetical protein	0.0583184	0.0611125	0.29711	1.80727	3.93415	0.080295	0.0691358	0.172421	0.327757	0.489375	0.0534959	0.0528305	0.0242917	0.0220566	0.0316147
aPFF0245w_0	aPFF0245w_0::PFF0245w::50S ribosomal subunit L24, putative	0.624272	0.640015	0.429304	0.421479	0.503241	0.640247	0.407133	0.599369	0.366232	0.429788	0.870286	0.777363	0.659346	0.718065	0.687937
aPF11_0197_1	aPF11_0197_1::PF11_0197::hypothetical protein	1.98283	1.51448	1.11253	0.82208	0.772453	1.91335	1.92684	1.04626	1.15	0.958464	1.95717	2.16857	1.77908	1.69958	1.79192
aPF10_0219_0	aPF10_0219_0::PF10_0219::hypothetical protein	0.507635	0.426677	0.369097	0.391467	0.50936	0.599043	0.578692	0.441023	0.353407	0.479232	0.575407	0.645287	0.743788	0.670276	0.820719
aPF08_0074_0	aPF08_0074_0::PF08_0074::hypothetical protein, conserved	1.07757	0.761129	0.486894	0.428004	0.50783	1.05651	0.949977	0.584121	0.393308	0.471625	1.17299	1.39246	1.05842	1.21556	1.08755
aPFD0200c_0	aPFD0200c_0::PFD0200c::hypothetical protein	0.991413	1.06002	0.794475	0.812946	0.812222	0.947692	0.871879	0.961805	0.97187	1.14737	1.35697	1.21259	0.948533	1.08568	0.968676
aPF14_0291_0	aPF14_0291_0::PF14_0291::hypothetical protein	0.527517		0.46857	0.535004	1.00648	0.497618	0.451943	0.526647	0.534386	0.744204	0.900296	0.937112	0.982078	0.894518	1.09766
aPFC0560c_1	aPFC0560c_1::PFC0560c::hypothetical protein	0.793926	0.745573	0.611235	0.611993	0.486416	0.798724	0.618381	0.494978	0.461709	0.457679	0.84941	0.862898	0.828231	0.855306	0.799221
aPF13_0232_0	aPF13_0232_0::PF13_0232::Casein kinase II regulatory subunit, putative	1.08022	0.825575	0.821961	0.544139	0.602666	0.865284	1.17531	0.973534	0.678314	0.646583	1.70534	1.85284	1.74669	1.70816	1.56177
aPFB0665w_2	aPFB0665w_2::PFB0665w::Ser/Thr protein kinase, putative	0.0649455		0.404436	2.48842	3.43397	0.0728994	0.0704161	0.218166	0.477385	0.671939	0.0495815	0.0742143	0.0740318	0.0943533	0.0784046
aPFE0635c_1	aPFE0635c_1::PFE0635c::hypothetical protein	0.824411	0.711128	0.464644	0.356235	0.460412	0.678281	0.742569	0.560662	0.371933	0.41077	0.776342	0.807552	0.677854	0.635965	0.725875
aPFB0315w_0	aPFB0315w_0::PFB0315w::41 kDa antigen	0.290267	0.305563	1.23294	3.81419	4.72343	0.22715	0.285505	0.631038	1.33525	1.81804	0.241384	0.283021	0.283403	0.29899	0.312354
aMAL7P1.67_0	aMAL7P1.67_0::MAL7P1.67::hypothetical protein	2.04777	1.9456	1.87559	1.67026	1.34453	2.10986	2.01134	1.89781	1.54901	1.59364	1.83843	1.53963	1.27358	1.24252	1.28862
aMAL13P1.175_0	aMAL13P1.175_0::MAL13P1.175::MSP7 fragment, pseudogene	3.16775	2.26227	2.24207	2.03563	2.60339	2.38772	3.18921	3.9305	4.27081	4.805	2.19724	1.84152	1.94102	1.80987	1.94241
aPFE1615c_0	aPFE1615c_0::PFE1615c::hypothetical protein	0.180257	0.173337	0.226432	0.225746	0.201908	0	0	0.242797	0.256505	0.229474	0.221812	0.262895	0.282246	0.303891	0.361673
aPFA0495c_0	aPFA0495c_0::PFA0495c::selenocysteine-specific elongation factor selB homologue, putative	0.671987	0.744462	0.583749	0.514126	0.399228	0.562065	0.478829	0.517263	0.461709	0.424716	0.720237	0.854093	0.81435	0.874912	0.827042
aPFL1295w_0	aPFL1295w_0::PFL1295w::hypothetical protein	3.0193	2.66006	2.64127	2.17655	2.05732	2.3444	3.48111	3.5622	3.97298	3.94162	3.81256	4.44782	3.72357	3.56827	3.79883
aPFF0265c_0	aPFF0265c_0::PFF0265c::calcium-binding protein, putative	2.10211	2.24116	1.89391	1.43929	1.52043	1.84573	1.55684	1.65501	1.63878	1.57842	2.36295	1.77737	1.26201	1.27193	1.09893
aPF11_0442_1	aPF11_0442_1::PF11_0442::hypothetical protein	0.176281	0.196671	0.82327	3.07301	5.02782	0.213416	0.203566	0.376512	0.682589	1.0358	0.116125	0.154718	0.129556	0.154396	0.166926
aPFF1440w_0	aPFF1440w_0::PFF1440w::SET-domain protein, putative	1.71907	1.34336	1.13478	1.07001	0.959065	1.64182	1.78473	1.68785	1.32243	1.25767	1.97152	1.86416	1.97457	2.30492	2.20418
aPF14_0263_0	aPF14_0263_0::PF14_0263::hypothetical protein	0.42811	0.435566	0.740812	0.832519	0.62714	0	0.303429	0.787038	0.73104	0.928037	0.4097	0.518242	0.539044	0.56857	0.453988
aPFE0610c_0	aPFE0610c_0::PFE0610c::CDK-activating kinase assembly factor, putative	1.20613	0.924466	0.773533	0.634176	0.567485	1.06074	0.930772	0.828091	0.72534	0.709974	1.08427	1.19875	1.38231	1.57705	1.51245
aPF14_0529_0	aPF14_0529_0::PF14_0529::gamma-adaptin, putative	1.70316	1.68337	1.17404	1.09089	0.926943	1.86158	1.97421	1.75353	1.61028	1.53532	2.55997	2.72706	2.64548	2.46666	2.50262
aPF11_0089_1	aPF11_0089_1::PF11_0089::hypothetical protein	0.31545	0.277784		0.225746	0.266152	0.226094	0.179241	0.315519	0.26078	0.368933	0.357509	0.369813	0.431467	0.471766	0.502042
aMAL8P1.132_1	aMAL8P1.132_1::MAL8P1.132::hypothetical protein	0.877427	1.06558	0.570661	0.424089	0.630199	0.553613	0.761774	0.528993	0.693989	0.991427	0.872896	0.871703	0.816663	0.887166	0.907976
aPFI1230c_0	aPFI1230c_0::PFI1230c::hypothetical protein	0.239901	0.28334	0.235594	0.275332	0.405346	0.239828	0.17412	0.246316	0	0	0.266175	0.290568	0.200117	0.247524	0
aMAL7P1.31_0	aMAL7P1.31_0::MAL7P1.31::hypothetical protein	1.04576	0.883354	0.66359	0.628956	0.617962	0.985727	0.842432	0.593504	0.554336	0.49191	1.14038	0.833967	0.688264	0.714389	0.695525
aPF11_0390_1	aPF11_0390_1::PF11_0390::reticulocyte binding protein, putative	0.416182	0.477789	0.630868	0.5337	0.595018	0.260959	0.189483	0.259218	0.220879	0.280186	0.343156	0.350945	0.183923	0.219341	0.250389
aPF13_0273_3	aPF13_0273_3::PF13_0273::hypothetical protein, conserved	1.16902	1.04447	0.623015	0.65114	0.437468	1.18646	0.976863	0.806978	0.611337	0.46909	1.43265	1.37485	1.15212	1.06729	1.21021
aPFL2435w_0	aPFL2435w_0::PFL2435w::hypothetical protein	1.8874	1.82449	1.47508	1.22921	1.06002	2.01794	1.93452	1.70779	1.14287	1.16258	2.66305	2.50064	2.20245	2.37109	2.25982
aPFA0675w_1	aPFA0675w_1::PFA0675w::P. falciparum RESA-like protein with DnaJ domain	0.544747	0.945578	1.10729	0.58459	1.03555	0.807176	0.754092	0.961805	0	1.04975	0.797219	1.12328	0.832858	0.881039	0.791633
aPFC0490w_0	aPFC0490w_0::PFC0490w::hypothetical protein	0.628249	0.57668	0.482967	0.820775	1.03402	0.633908	0.518518	0.416391	0.431784	0.415842	0.692837	0.552205	0.601508	0.645768	0.648735
aPF14_0147_0	aPF14_0147_0::PF14_0147::ATP-dependent protease, putative	1.13456	1.0178	0.64003	0.617212	0.747979	0.927618	0.686237	0.757715	0.656938	0.896342	2.38383	2.44656	2.65705	3.02298	3.04387
aPFC0875w_1	aPFC0875w_1::PFC0875w::hypothetical protein	0.324728	0.274451	0.44632	1.29314	2.25311	0.303219	0.270142	0.234587	0.374783	0.472893	0.254432	0.236479	0.190863	0.175227	0.180836
aPFL1435c_1	aPFL1435c_1::PFL1435c::myosin d	0.316775	0.58668	2.59939	5.09168	5.81557	0.319067	0.353361	1.38054	2.66623	3.53465	0.125259	0.133334	0.109891	0.104156	0.118871
aPF11_0067_0	aPF11_0067_0::PF11_0067::hypothetical protein	0.371117	0.373342	0.337685	0.781628	1.21298	0.440566	0.339277	0.327248	0.371933	0.368933	0.473634	0.449059	0.503185	0.491372	0.519747
aPFE0365c_0	aPFE0365c_0::PFE0365c::hypothetical protein	0.485103	0.58668	0.801019	2.85379	5.55554	0	0.572291	0.513745	0.708239	0.794917	0.29488	0.305662	0.237133	0.224242	0.273151
aPFL1735c_1	aPFL1735c_1::PFL1735c::hypothetical protein	1.116	0.998912	0.803637	0.776409	0.66538	1.13047	1.18171	0.944211	0.937669	0.761954	1.53311	1.54466	1.26085	1.23149	1.26333
aPFD0255w_0	aPFD0255w_0::PFD0255w::Plasmodium yoelii blood stage membrane protein ag-1	1.00069	0.997801	1.33111	1.5489	1.64127	1.09772	1.14202	1.60926	2.64485	2.812	0.790695	0.793715	0.683638	0.638416	0.638618
aPFC0100c_0	aPFC0100c_0::PFC0100c::regulatory protein, putative	0.738258	0.742239	0.551028	0.455406	0.452764	0.788159	0.935893	0.699068	0.51016	0.556569	0.952487	1.17108	1.09081	0.998674	1.11663
aPF14_0307_0	aPF14_0307_0::PF14_0307::hypothetical protein, conserved	0.641503	0.501123	0.5026	0.579371	0.538422	0.624399	0.624783	0.601715	0.47311	0.585728	0.58715	0.491827	0.592254	0.555091	0.632295
aMAL8P1.106_0	aMAL8P1.106_0::MAL8P1.106::hypothetical protein	0.889356	1.31336	2.33238	2.13871	2.44737	1.14103	1.44161	3.31354	4.87787	5.17393	0.679789	0.677991	0.551768	0.446034	0.50963
aPFI1130c_0	aPFI1130c_0::PFI1130c::DNA-directed RNA polymerase II, putative	0.66536	0.707794	0.558881	0.521956	0.510889	0.868454	0.556927	0.593504	0.505885	0.472893	0.93683	0.991201	0.976294	1.04769	0.98638
aPF14_0047_1	aPF14_0047_1::PF14_0047::hypothetical protein	1.18227	1.11669	0.938449	0.575456	0.689854	1.05334	1.16379	0.862106	0.880668	0.656726	1.95325	1.97485	1.81262	1.8209	1.89562
aPF14_0497_1	aPF14_0497_1::PF14_0497::hypothetical protein	0.644154	0.704461	0.536631	0.351015	0.50936	0.553613	0.39561	0.438677	0.430359	0.594603	0.643255	0.737111	0.588784	0.667825	0.668968
aPFA0180w_1	aPFA0180w_1::PFA0180w::hypothetical protein	0.988763	0.856687	0.833741	0.76858	0.813752	1.15899	0.937174	0.824572	0.779491	0	0.981192	1.18365	0.871031	0.992547	0
aPF10_0030_1	aPF10_0030_1::PF10_0030::hypothetical protein	2.19092	1.81226	1.06803	1.00346	1.10438	1.54357	1.27517	1.092	0.75384	0.884931	2.58346	2.12957	2.22327	2.06719	1.99173
aPFF1195c_0	aPFF1195c_0::PFF1195c::hypothetical protein, conserved	0.359189		0.352082	0.351015	0.451235	0.399362	0.284225	0.354226	0.537236	0.817737	0.263565	0.387424	0.24523	0.276933	0
aPFF1065c_1	aPFF1065c_1::PFF1065c::hypothetical protein	0.558001	0.562235	0.522233	0.549358	0.599607	0.913884	0.677274	0.753023	1.07447	1.1816	1.24476	1.41384	1.73049	1.71796	1.92218
aPF14_0404_3	aPF14_0404_3::PF14_0404::hypothetical protein	0.526191	0.546679	0.261771	0.260978	0.328866	0.582139	0	0.628692	0.394733	0.367665	0.442319	0.530821	0	0.341877	0.410992
aPFE1320w_2	aPFE1320w_2::PFE1320w::hypothetical protein	0.889356	0.816686	0.599456	0.555883	0.458883	0.847323	0.705441	0.668572	0.535811	0.498249	1.10384	1.0956	1.06305	1.41652	1.24815
aMAL13P1.52_1	aMAL13P1.52_1::MAL13P1.52::hypothetical protein	1.28831	0.945578	0.912272	1.35056	0.812222	1.11885	1.12538	1.03805	0.937669	0.870985	1.29564	1.15221	1.28283	1.32095	1.257
aPFB0545c_0	aPFB0545c_0::PFB0545c::ribosomal protein L7/L12, putative	0.881404	0.757795	0.564116	0.468455	0.570544	0.82725	0.851394	0.574737	0.451734	0.518534	0.750247	0.786168	0.882598	0.870011	1.00156
aPFD0285c_3	aPFD0285c_3::PFD0285c::amino acid decarboxylase, putative	0.401602	0.528901	0.467261		0.569015	0.466979	0.389209	0.589985	0.537236	0.869718	0.825924	0.815099	0.685951	0.847954	0.805544
aPF14_0099_0	aPF14_0099_0::PF14_0099::hypothetical protein, conserved	0.581859	0.672238	0.901801	0.853397	0.983539	0.735333	0.346959	0.78	0.987545	1.06496	0.665436	0.771074	0.698675	0.708262	0.704377
aPFD0225w_2	aPFD0225w_2::PFD0225w::hypothetical protein	1.53616	1.29781	1.23294	1.05174	0.711268	1.30691	1.16891	1.16824	1.36945	1.05482	1.14559	0	1.61482	1.82212	1.61741
aMAL8P1.60_0	aMAL8P1.60_0::MAL8P1.60::hypothetical protein	0.668011	0.632237		0.679847	0.631728	0.574743	0.567169	0.618136	0.349132	0.488107	0.454062	0.41887	0.257955	0.278158	0
aPFF1440w_7	aPFF1440w_7::PFF1440w::SET-domain protein, putative	2.1432	1.58448	1.63083	1.36622	1.00648	2.05914	2.25459	1.92713	1.54616	1.3705	1.19518	1.62517	1.3638	1.24497	1.40369
aPF14_0258_0	aPF14_0258_0::PF14_0258::hypothetical protein	3.24198	3.81898		2.70634	2.72729	2.90964	2.47352	1.95059	2.2145	2.33023	1.87757	1.81007	1.91095	1.61748	1.99426
aPFL1760w_1	aPFL1760w_1::PFL1760w::hypothetical protein	1.57062	1.46115	1.23687	0.966923	0.862699	1.53406	1.62853	1.33832	1.40365	1.17526	2.44254	2.59498	2.4257	2.45196	0
aPFL0465c_1	aPFL0465c_1::PFL0465c::Zinc finger transcription factor (krox1)	1.46459	1.42114	2.02218	2.09696	2.34642	1.14737	1.41088	1.81922	2.03922	2.70677	2.42558	2.96102	2.59458	2.83427	2.79601
aPFL1470c_0	aPFL1470c_0::PFL1470c::hypothetical protein	0.50631	0.457788	0.395274	0.41104	0.364047	0.474374	0.362323	0.394105	0.339157	0.323292	0.429272	0.593714	0	0.6666	0.696789
aPFF0280w_0	aPFF0280w_0::PFF0280w::hypothetical protein,conserved	0.534144		0.641339	0.572846	0.702091	0.544104	0	1.13892	1.86536	1.93214	0.810267	0.656608	0.583	0.675177	0.690466
aPFD0250c_1	aPFD0250c_1::PFD0250c::hypothetical protein	1.70051	1.96449	2.07061	1.64025	1.59691	1.69676	2.28404	2.38926	2.71468	2.64085	2.0746	2.72077	2.8375	2.40049	2.59747
aPFI0630w_0	aPFI0630w_0::PFI0630w::26S proteasome regulatory subunit, putative	1.78401	1.43448	1.22509	1.06609	0.881055	1.90595	1.57732	1.6597	1.81406	1.30331	1.95456	1.84278	1.58706	1.68488	1.56683
aPFC0765c_0	aPFC0765c_0::PFC0765c::hypothetical protein	3.26318	2.4145	2.39259	1.77334	1.99767	2.34018	2.70142	2.2016	1.96797	2.00314	2.99185	3.02266	2.89302	3.29501	3.27402
aPF14_0649_2	aPF14_0649_2::PF14_0649::hypothetical protein	1.90463	2.12894	2.04181	1.49671	1.48984	1.35868	2.51577	2.48662	2.37125	2.6586	1.54877	1.58114	1.44362	1.25968	1.44416
aPFL2255w_0	aPFL2255w_0::PFL2255w::hypothetical protein	2.46263	2.3645	2.62818	1.55673	0.963654	2.56733	2.56955	2.12535	1.85681	1.96637	1.24867	1.42768	1.65068	1.8503	1.90953
aPF13_0121_1	aPF13_0121_1::PF13_0121::dihydrolipoamide succinyltransferase, putative	1.15444	0.965578	0.752592	0.698116	0.631728	1.09983	1.04984	0.681474	0.629863	0.606013	1.68708	1.44026	1.32332	1.38221	1.25068
aPFD0230c_0	aPFD0230c_0::PFD0230c::protease, putative	1.04178	1.11669	2.0693	2.03041	2.75941	0.91494	1.39296	1.88842	2.78308	3.22024	0.737199	0.787426	0.742632	0.68498	0.675291
aMAL13P1.157_1	aMAL13P1.157_1::MAL13P1.157::hypothetical protein	0.270385	0.344452	0.496056	1.05826	1.16403	0.397249	0.320073	0	0.437484	0.519802	0.387519	0.369813	0	0.408047	0.469163
aMAL7P1.43_0	aMAL7P1.43_0::MAL7P1.43::RIF pseudogene	0.852244	0.802241	1.03792	1.06348	0.868818	0.240885	0	0.233414	0.104027	0	0.31967	0.316983	0.321576	0.262229	0.271887
aPF07_0130_0	aPF07_0130_0::PF07_0130::stevor	0.628249	0.874465	0.910963	0.780324	0.851992	0.706807	0.695199	0.943038	1.1785	0.874789	0.639341	0.710696	0.623487	0.662924	0.680349
aPF14_0140_1	aPF14_0140_1::PF14_0140::hypothetical protein	0.90261	0.751129	1.11776	1.68853	2.16593	0.911771	1.14458	1.4345	2.23017	1.96637	1.37915	1.239	1.1822	1.16287	1.10146
atRNA_RNAGly2_0	atRNA_RNAGly2_0::tRNA_RNA-Gly2::	1.82113	1.63115	2.0392	1.65199	1.4776	1.0301	0.754092	0.531339	0.672614	0.555301	0.395347	0.159749	0.0879128	0	0
aPF11_0440_0	aPF11_0440_0::PF11_0440::hypothetical protein	1.38904	1.51115	1.24996	0.82469	0.951417	1.33649	1.55812	1.32072	1.11295	1.43263	1.8854	1.92706	1.3453	1.49005	1.35817
aMAL13P1.151_3	aMAL13P1.151_3::MAL13P1.151::hypothetical protein	1.28698	2.11338	1.63738	1.15613	1.20686	1.65978	1.68358	1.56352	1.47063	0.910288	1.84104	1.9497	0	2.1689	2.11819
aPF11_0240_6	aPF11_0240_6::PF11_0240::dynein heavy chain, putative			0.176695		0.154491	#N/A	#N/A	#N/A	#N/A	#N/A	0.109601	0	0	0	0
aPF11_0044_0	aPF11_0044_0::PF11_0044::hypothetical protein	1.507	1.14336	0.871697	0.634176	0.647025	1.43791	1.34943	0.90785	0.830792	0.74674	1.47701	1.53083	1.43668	1.46922	1.45175
aPF11_0309_0	aPF11_0309_0::PF11_0309::hypothetical protein	1.32012	0.923355	0.585058	0.516736	0.492534	1.26359	0.951257	0.60406	0.494485	0.529945	1.4757	1.40756	1.4494	1.79149	1.58833
aPF13_0242_0	aPF13_0242_0::PF13_0242::isocitrate dehydrogenase (NADP), mitochondrial precursor	1.57857	1.5867	1.33896	1.00476	0.960594	1.4918	1.67206	1.26325	1.40365	1.21583	1.44961	1.86039	1.57202	1.63219	1.75778
aPFL1960w_0	aPFL1960w_0::PFL1960w::erythrocyte membrane protein 1 (PfEMP1)	0.271711	0.368897		0.242709	0.442057	0.368723	0.267581	0.408181	0.286431	0.389218	0.277917	0.57233	0.164258	0.083325	0
aPFL1050w_1	aPFL1050w_1::PFL1050w::hypothetical protein	2.47721	2.29561	1.70282	1.49018	1.41795	2.09929	2.44792	1.77934	1.67868	1.66844	1.73796	1.86919	1.85195	2.0194	1.66547
aPFD1115c_0	aPFD1115c_0::PFD1115c::hypothetical protein	0.967556	0.833353	1.0353	1.21746	1.27263	0.904375	0.949977	0.965324	1.02175	1.11694	1.08296	1.09938	1.3291	1.41285	1.41761
aPFB0680w_1	aPFB0680w_1::PFB0680w::hypothetical protein	1.15311	1.73782	3.74333	3.42664	3.53034	1.16005	1.54403	2.77985	4.05563	3.52578	0.752856	0.63774	0.488147	0.34923	0.352821
aPF11_0450_0	aPF11_0450_0::PF11_0450::hypothetical protein	0.259782	0.30334	0.425378	0.450187	0.556778	0.335971	0.222771	0.335459	0.326332	0.476697	0.330109	0.322014	0.255641	0.321046	0.436284
aPFD0985w_0	aPFD0985w_0::PFD0985w::hypothetical protein	0.42546	0.374453	0.654428	2.70112	5.32457	0.464866	0.490352	0.584121	0.863568	1.01552	0.564968	0.654092	0.695205	0.797714	0.829571
aPF11_0070_0	aPF11_0070_0::PF11_0070::hypothetical protein	0.960929	0.757795	0.693693	0.595029	0.58584	0.653982	0.501874	0.411699	0.440334	0.54389	0.769818	1.00378	0.876814	0.872461	1.03443
aPFA0330w_0	aPFA0330w_0::PFA0330w::pfAARP2 protein	0.588486	0.544457	0.768298	0.769884	0.969772	0.589534	0.426337	0.593504	0.74529	0.796185	1.07644	1.32831	1.09081	0.947209	1.1356
aPF07_0087_0	aPF07_0087_0::PF07_0087::hypothetical protein	2.09284	1.70115	1.14132	0.929081	0.835167	2.12887	1.9486	1.21868	0.862143	0.760686	1.73796	1.25535	0.946219	1.0048	0.90924
aPFF1060w_0	aPFF1060w_0::PFF1060w::hypothetical protein	0.864173	1.09003	0.764371	0.441052	0.676087	0	0.710562	0.329594	0.503035	0.697296	0.99685	1.04277	0.936965	0.979068	0.94212
aPFL0305c_0	aPFL0305c_0::PFL0305c::hypothetical protein	0.856221	1.3367	1.5222	1.82423	2.34642	0.727937	0.795061	0	2.03922	1.88777	0.450148	0.5195	0.314635	0.498724	0.351556
aPF11_0290_0	aPF11_0290_0::PF11_0290::hypothetical protein	0.455944	0.477789	0.827196	3.56496	5.00641	0.454301	0.468587	0.620482	0.864993	1.25767	0.361423	0.294341	0.33083	0.343103	0.362937
aPF14_0458_0	aPF14_0458_0::PF14_0458::hypothetical protein		0.571124	0.918816	0.456711	0.521597	0.427888	0.39433	0.296752	0	0.409503	0.769818	0.659123	0.591098	0.366385	0
aMAL7P1.215_0	aMAL7P1.215_0::MAL7P1.215::	0.145796		0.227741		0.168257	0.134177	0.061454	0.0985264	0	0.169887	0.37969	0.308178	0	0	0.189689
aPF13_0072_0	aPF13_0072_0::PF13_0072::hypothetical protein	1.43543	1.55448	2.05883	2.07216	2.5881	1.30374	1.77064	2.14999	2.91418	3.18347	1.2278	1.31447	1.16484	1.1788	1.25321
aPF11_0313_0	aPF11_0313_0::PF11_0313::ribosomal phosphoprotein P0	1.06961	0.921133	0.492129	0.420174	0.412994	1.07236	1.08057	0.66388	0.617038	0.441198	1.23562	1.26164	1.11279	1.10651	1.15204
aPF13_0121_0	aPF13_0121_0::PF13_0121::dihydrolipoamide succinyltransferase, putative	1.10407	0.976689	0.861227	0.737262	0.969772	1.04806	0.952537	0.92779	1.02887	1.13469	1.26824	1.17108	1.04801	1.12489	1.14066
aPFL2510w_1	aPFL2510w_1::PFL2510w::chitinase	0.597764	0.731128	0.801019	0.686372	0.890232	0.552556	0.626063	0.826918	1.10725	0.921698	0.649779	0.61384	0.445348	0.513429	0.546303
aMAL7P1.144_1	aMAL7P1.144_1::MAL7P1.144::hypothetical protein, conserved	0.12724	0.111114	0.116488	0.093952	0.0994246	0.124669	0.115226	0.123158	0.111152	0.140727	0.0887248	0.120755	0.0971667	0.0992547	0.117607
aPFC0340w_0	aPFC0340w_0::PFC0340w::DNA polymerase delta small subunit, putative		1.1278	0.866462	0.712469	0.702091	1.30057	1.03192	0.985264	0.864993	0.70617	1.53572	1.58617	1.61251	1.5795	0
aPFD0170c_0	aPFD0170c_0::PFD0170c::hypothetical protein	2.29032	2.11227	1.98684	1.62459	1.78505	1.47489	2.25844	2.48075	2.25725	2.5838	1.79276	1.85284	1.73743	1.77311	1.64523
aMAL8P1.149_1	aMAL8P1.149_1::MAL8P1.149::hypothetical protein	0.762116	1.02447	1.84549	1.40928	0.94071	0.498674	0.398171	0.674436	0.75669	1.15497	0.750247	0.86164	0.763453	0.872461	0.799221
aPFE0485w_1	aPFE0485w_1::PFE0485w::phosphatidylinositol 4-kinase	0.976834	0.837797	1.15703	1.92341	2.08945	0.979388	1.04216	1.00755	1.11722	1.05228	1.01251	0.991201	0.91383	0.938631	0.978793
aPF10_0285_0	aPF10_0285_0::PF10_0285::hypothetical protein	0.556676	0.690016	0.273551		0.408406	0.597986	0.596616	0.541895	0.381908	0.2954	0.563664	0.626419	0.468483	0.385991	0
aPFL0115w_1	aPFL0115w_1::PFL0115w::hypothetical protein	1.06431	1.4067	1.09159	0.801202	0.870348	0.731107	1.11385	1.16472	1.11152	1.00664	1.0112	1.08554	0.989019	0.98642	1.16722
aPF14_0414_2	aPF14_0414_2::PF14_0414::hypothetical protein, conserved	2.66012	2.83007	2.57844	1.69766	1.54949	2.70045	2.71678	2.08196	2.10477	1.73183	3.07145	2.86543	3.09314	2.6664	2.73025
aPF13_0041_1	aPF13_0041_1::PF13_0041::hypothetical protein	1.16372	1.17447	1.41487	2.17264	2.89402	1.42629	0.870599	1.51895	1.82261	1.65196	1.40003	1.13208	1.63333	1.60523	1.57568
aPF13_0258_2	aPF13_0258_2::PF13_0258::sexual stage-specific protein kinase	2.40298	3.00674	2.87294	2.39969	2.36172	1.82248	2.6182	3.10945	2.2772	3.58283	2.86007	3.20253	3.1718	2.90289	2.55827
aPFL1190c_0	aPFL1190c_0::PFL1190c::hypothetical protein	1.08684	1.02113	1.31278	1.16266	1.15485	1.09666	1.27133	1.73946	2.07769	2.64212	1.29042	1.41636	1.35686	1.46186	1.42013
aPF10_0374_5	aPF10_0374_5::PF10_0374::gene 11-1 protein precursor	0.512937	0.640015	0.681913		0.503241	0.456414	0.370004	0.346015	0.22373	0.381611	0.404481	0.514468	0.375943	0.330849	0.435019
aPFF0740c_1	aPFF0740c_1::PFF0740c::hypothetical protein	2.09151	2.02116	1.65308	1.18353	1.17321	2.60747	2.2021	1.77699	1.75991	1.55941	1.858	1.75724	1.67613	1.61503	1.55924
aPFL1055c_1	aPFL1055c_1::PFL1055c::hypothetical protein	0.284965	0.367786	0.481659	0.58459	0.601136	0.290541	0.573571	0.836301	1.12007	1.16512	0.318366	0.318241	0.323889	0.327173	0.349027
aPFD0985w_4	aPFD0985w_4::PFD0985w::hypothetical protein	0.367141	0.305563	0.48035	2.07738	4.23549	0.377175	0.380247	0.453925	0.570012	0.698563	0.323585	0.437738	0.434937	0.464414	0.491926
aPFI0990c_0	aPFI0990c_0::PFI0990c::hypothetical protein	1.91125	1.7856	1.34289	1.04	0.897881	1.91757	1.70407	1.53772	1.3723	1.30584	1.94151	1.94718	1.72934	1.75227	1.7034
aPFD0615c_3	aPFD0615c_3::PFD0615c::erythrocyte membrane protein 1 (PfEMP1)	0.113986		0.0863844	0.0887325		0.084521	0	0	0.0598512	0.0646583	0.0626293	0.0842772	0.0289187	0	0
aMAL13P1.57_0	aMAL13P1.57_0::MAL13P1.57::hypothetical protein	1.59846	1.5167	1.59942	1.1222	1.17015	1.6376	1.77192	1.39462	1.46208	1.29317	1.59444	1.7824	1.67497	1.46922	1.71478
aPF08_0060_2	aPF08_0060_2::PF08_0060::asparagine-rich antigen	0.861522	0.795574	1.01829	0.846873	0.835167	1.03433	1.03576	1.26677	1.4692	1.10933	0.965535	1.26038	1.40892	1.42143	1.54154
aPFE1120w_13	aPFE1120w_13::PFE1120w::hypothetical protein	3.89938	5.22901	10.9918		11.131	3.89008	5.32601	8.56124	12.023	11.2353	0.99685	0.768558	0.711399	0.655571	0.751166
aPFA0340w_1	aPFA0340w_1::PFA0340w::hypothetical protein	2.20285	1.61115	1.24079	1.18092	1.03402	2.37293	1.95245	1.93769	1.58321	1.89284	2.18942	2.10316	2.10297	2.19096	2.28258
aPF10_0372_0	aPF10_0372_0::PF10_0372::hypothetical protein	1.28168	1.26114	1.4489	1.25922	1.21451	1.40939	1.6503	1.40752	1.82546	1.59744	1.18343	1.17233	1.08619	1.14449	1.00661
aPFA0725w_2	aPFA0725w_2::PFA0725w::hypothetical protein	0.673313	0.627792	0.501291	0.396686	0.593488	0.679338	0.391769	0.5677	0.49021	0.759418	2.20507	2.28681	1.7652	2.28163	1.99805
aPF10_0286_1	aPF10_0286_1::PF10_0286::hypothetical protein	0.436063	0.305563	0.187166	0.217916	0.227912	0.413097	0.303429	0.20409	0.193804	0.192707	0.511473	0.533336	0.633897	0.631064	0.662645
aPFF0385c_1	aPFF0385c_1::PFF0385c::hypothetical protein	1.04841	0.775574	0.671443	0.922557	1.31546	0.915997	0.708001	0.591158	0.552911	0.749276	1.35958	1.29812	1.09775	1.32585	1.24309
aPFF0350w_0	aPFF0350w_0::PFF0350w::MYND finger protein, putative	0.819109	0.864465	1.32194	1.02825	1.12273	0.817741	0.960219	0.916061	1.378	1.35275	0.902906	1.02894	0.911517	0.943533	1.18366
aMAL13P1.29_0	aMAL13P1.29_0::MAL13P1.29::hypothetical protein	2.26514	2.30783	2.94754	2.41274	2.2577	2.66136	3.00613	3.79678	3.65947	3.82879	2.95532	2.96102	3.34416	3.70306	3.28793
aMAL8P1.113_8	aMAL8P1.113_8::MAL8P1.113::hypothetical protein	1.77209	0.764462	1.00127	0.756836	0.616432	1.46538	1.38015	1.1917	0.926269	1.07003	0.747637	0.654092	0.616546	0.731544	0.828306
aPFI0410c_3	aPFI0410c_3::PFI0410c::hypothetical protein	0.424134	0.81113	2.05752	2.74288	3.31925	0.456414	0.686237	2.1406	3.47422	3.78314	0.403176	0.364782	0.328516	0.308792	0.300972
aPF13_0033_1	aPF13_0033_1::PF13_0033::26S proteasome regulatory subunit, putative	1.89667	1.18781	1.47639	1.1731	1.22828	1.40728	1.65286	1.59519	1.72001	1.75465	1.9389	2.11825	1.83229	1.82702	1.74893
aPF10_0272_0	aPF10_0272_0::PF10_0272::ribosomal protein L3, putative	0.846943	0.90891	0.718561	0.647225	0.573603	1.26465	0.932053	0.783519	0.625588	0.55023	1.0647	1.06919	0.921927	1.19351	1.07617
aPFF1510w_1	aPFF1510w_1::PFF1510w::hypothetical protein, conserved in Plasmodium falciparum	0.816458	0.901132	0.654428	0.535004	0.761745	0.535652	0.719524	0.755369	0.691139	0.840558	1.29434	1.45158	1.30018	1.51455	1.41381
aPFL1645w_1	aPFL1645w_1::PFL1645w::hypothetical protein	1.16504	1.08114	1.08897	0.844263	0.876466	1.05863	1.45569	1.22689	1.1329	1.07637	1.49266	1.8541	1.76057	1.73144	1.98794
aPF14_0647_0	aPF14_0647_0::PF14_0647::hypothetical protein	1.25385	1.18336	2.08501	3.05083	3.3682	1.30162	1.59908	2.02096	2.85718	2.64465	1.18213	1.19498	1.17525	1.34178	1.27218
aPF13_0125_0	aPF13_0125_0::PF13_0125::hypothetical protein	0.345934	0.236672	0.41098	1.1483	1.80035	0.340197	0.334156	0.304963	0.447459	0.422181	0.31967	0.349688	0.386353	0.356582	0.405933
aPF11_0149_0	aPF11_0149_0::PF11_0149::hypothetical protein	0.967556	0.836686	0.734268	1.05305	1.26499	1.0058	0.942295	0.795249	0.835067	0.688421	1.19648	1.34592	1.42049	1.56234	1.61362
aMAL7P1.57_0	aMAL7P1.57_0::MAL7P1.57::rifin	0.363165	0.338897	0.234285	0.262283	0.258504	0.313784	0.199726	0.279158	0.245105	0.263704	0.408395	0.411323	0.161945	0.247524	0.288327
aPFE0435c_0	aPFE0435c_0::PFE0435c::single-strand binding protein, putative	2.72374	1.78115	1.27875	1.14569	1.3537	2.17113	2.31349	1.78169	1.49486	1.84086	2.42167	1.9975	1.91904	2.21056	2.05369
aPF11_0482_0	aPF11_0482_0::PF11_0482::hypothetical protein	0.760791	0.788907	0.972479	0.544139	0.708209	0.875849	1.02167	0.737775	0.632713	0.494446	1.59444	1.45284	0	0.590627	0.842217
aPF07_0102_0	aPF07_0102_0::PF07_0102::hypothetical protein	0.893332	0.894465	0.708091	0.529785	0.62408	0.978331	0.664472	0.810497	0.548636	0.65419	1.49527	1.24403	1.06536	1.13469	1.00788
aPFI1135c_0	aPFI1135c_0::PFI1135c::hypothetical protein	0.681265	0.56668	0.645266	0.558492	0.706679	0.825137	0.645267	0	0.669764	0.645315	0.383604	0	0.610762	0.526908	0.548832
aPFI0175w_0	aPFI0175w_0::PFI0175w::hypothetical protein	0.178932	0.345564	0.734268	3.31964	3.32078	0.240885	0.241975	0.465654	0.738165	1.11441	0.199631	0.225159	0.157318	0.123762	0.153015
aPFL1550w_1	aPFL1550w_1::PFL1550w::lipoamide dehydrogenase	2.9981	2.96562	3.73024	3.40315	2.63399	2.73954	2.61436	3.19624	2.89851	3.25954	2.16332	2.86543	3.51535	3.26928	3.92782
aPFB0315w_2	aPFB0315w_2::PFB0315w::41 kDa antigen	1.00997	1.07002	1.85203	4.21349	4.71884	1.22872	1.07545	1.15886	1.52621	1.54166	1.06078	1.10692	0.999429	0.998674	1.01799
aPFI0585c_2	aPFI0585c_2::PFI0585c::hypothetical protein	1.69123	1.36559	0.947611	0.803812	0.734212	1.54885	1.38144	0.838647	0	0.737865	1.89845	2.24907	1.96647	1.77066	1.88803
aPF14_0334_3	aPF14_0334_3::PF14_0334::NAD(P)H-dependent glutamate synthase, putative	1.40097	1.31114	2.79048	3.45926	3.83167	1.25408	1.384	2.2837	3.6552	3.73116	1.23823	1.30189	1.19955	1.33688	1.16848
aPF14_0216_0	aPF14_0216_0::PF14_0216::hypothetical protein	1.8145	2.2045	3.12424	1.66895	1.62597	1.94821	1.36095	2.47958	2.79876	2.51153	2.11896	1.46919	2.06132	2.57817	2.48239
aPF07_0086_3	aPF07_0086_3::PF07_0086::hypothetical protein	2.09019	2.19894	1.88606	1.61284	1.47454	2.17219	2.37622	2.13708	1.95229	1.78001	2.03154	2.09184	2.0567	1.89074	2.35593
aPF11_0242_2	aPF11_0242_2::PF11_0242::asparagine-rich protein	1.11733	1.45448	2.14914	2.08652	2.36019	1.15794	1.89099	3.74518	4.81375	5.09152	0.73198	0.915729	0.859463	0.850405	1.03064
aPF14_0419_3	aPF14_0419_3::PF14_0419::hypothetical protein	0.660059	0.678905	1.01567	1.28401	1.53267	0	0.684956	1.29961	1.42503	1.74324	0.310537	0.244027	0.222095	0.197284	0.24533
aMAL13P1.348_1	aMAL13P1.348_1::MAL13P1.348::hypothetical protein	1.09877		0.888713	0.733348	0.760216	1.23612	1.15482	0.8797	0.783766	0.723919	0.932916	0.758495	0.595725	0.562443	0.488132
aPF10_0232_1	aPF10_0232_1::PF10_0232::hypothetical protein	0.915865	0.831131	1.19237	1.38579	1.75293	0.979388	1.09209	1.29726	1.06022	1.41868	1.37132	1.26919	1.65878	1.56847	1.27218
aPFL1075w_1	aPFL1075w_1::PFL1075w::hypothetical protein	2.16043	1.88782	2.03396	1.70549	1.66574	1.77389	1.81545	1.73477	2.40972	2.28459	1.21866	1.66039	1.64605	1.9275	1.8893
aPFL1290w_1	aPFL1290w_1::PFL1290w::hypothetical protein	0.478476	0.530012	0.52616	0.431918	0.428291	0.525087	0.512117	0.476211	0.541511	0.586996	0.811571	0.963528	0.91036	0.931279	0.933267
aPFF0470w_0	aPFF0470w_0::PFF0470w::hypothetical protein			0.315434		0.443587	0	0	0	0	0.456412	0	0.362266	0	0	0
aPFF0655c_0	aPFF0655c_0::PFF0655c::adapter-related protein, putative	1.44603	1.10225	0.943684	0.849483	0.847403	1.10089	1.41728	1.29726	1.09157	1.21583	2.0498	2.26542	2.78892	2.46666	0
aPFL0710w_0	aPFL0710w_0::PFL0710w::hypothetical protein	1.10142	0.977801	1.10075	0.833824		0.992066	0.924371	0.840993	0.436059	0.71758	0.786781	0.845288	1.04686	0.854081	1.01673
aMAL13P1.256_0	aMAL13P1.256_0::MAL13P1.256::phosphatidylinositol transfer protein, putative	0.620296	0.69335	0.969862	1.22007	1.23286	0.543048	0.796342	1.1049	1.38085	1.33247	0.549311	0.592456	0.571433	0.613909	0.596886
aPF08_0111_1	aPF08_0111_1::PF08_0111::hypothetical protein	1.06431	1.25781	0.901801	0.678542	0.637847	0.991009	0.978143	0.92779	0.884943	1.00918	1.39089	1.79246	1.74437	1.52313	1.74893
aPF14_0495_3	aPF14_0495_3::PF14_0495::hypothetical protein	1.71377	2.25894	4.03651	4.7785	4.31044	1.44637	1.42881	3.3628	4.96195	5.09026	0.58454	0.630192	0.506655	0.409273	0.398346
aPF10_0250_1	aPF10_0250_1::PF10_0250::hypothetical protein	0.550049	0.652237	0.543175	0.600249	0.877996	0.346536	0.235574	0.402316	0.522986	0.565443	0.621074	0.505663	0.385197	0.378638	0.392023
aPFC1025w_0	aPFC1025w_0::PFC1025w::F49C12.11-like protein	1.30289	1.07669	1.01174	0.882105	0.908588	0.617004	1.11513	0.951249	0.571437	0.802524	1.19779	1.16101	1.09081	1.12611	1.16469
aPF11_0528_0	aPF11_0528_0::PF11_0528::hypothetical protein	2.47058	2.81673	3.50904	3.76721	1.82941	1.99364	2.5337	3.90704	4.05563	3.48267	1.5031	1.47674	1.27589	0.928828	1.15078
aPFD0625c_3	aPFD0625c_3::PFD0625c::erythrocyte membrane protein 1 (PfEMP1)	2.6177	4.20565	3.84411	3.61846	6.73334	2.48175	2.73854	2.64731	2.54653	2.92737	3.02969	3.87927	2.6154	2.61248	2.08784
aPF14_0045_0	aPF14_0045_0::PF14_0045::hypothetical protein	0.100732	0.0955578	0.100782	0.150062	0.261563	0.120442	0.111385	0.111429	0.116852	0.115371	0.105687	0.105661	0.113361	0.105382	0.115078
aPF07_0106_0	aPF07_0106_0::PF07_0106::hypothetical protein	0.22267	0.222227	0.231667	0.425394	0.616432	0.23032	0.235574	0.208782	0.312081	0.408235	0.213983	0.260379	0.256798	0.237721	0.298443
aPFF0195c_2	aPFF0195c_2::PFF0195c::hypothetical protein	1.06829	1.13225	0.941067	0.70464	0.942239	1.0132	1.04088	0.835128	0.74814	0.967339	6.14811	4.94594	4.32623	3.86481	5.12159
aPFD0380c_2	aPFD0380c_2::PFD0380c::hypothetical protein	1.47784	1.46892	2.53002	2.82117	3.44927	1.45693	1.91276	2.40569	3.22769	3.31025	1.24867	1.2541	1.00868	0.938631	0.905446
aPF14_0740_1	aPF14_0740_1::PF14_0740::hypothetical protein	1.45664	1.32892	2.09155	1.40537	2.19193	1.27204	1.19323	1.54358	1.4578	1.99553	0	2.0541	1.26201	1.39937	1.39231
aMAL7P1.152_1	aMAL7P1.152_1::MAL7P1.152::hypothetical protein	1.05238	1.08447	0.965935	0.871666	0.74339	0.992066	0.932053	1.06854	1.04882	0.906484	1.1482	1.07045	1.13824	1.27316	1.36449
aPF13_0157_1	aPF13_0157_1::PF13_0157::ribose-phosphate pyrophosphokinase, putative	0.739584	0.727795	0.56019	0.518041	0.437468	0.792385	0.823228	0.616963	0.51301	0.442466	0.78939	0.893087	0.91036	0.948434	0.973734
aPFE0260w_1	aPFE0260w_1::PFE0260w::hypothetical protein	2.00006	2.14894	1.4489	0.991716	0.648554	1.76438	1.65542	1.30078	1.21982	1.03327	1.28521	1.25787	1.55235	1.77311	1.72996
aPFA0185w_0	aPFA0185w_0::PFA0185w::hypothetical protein	0.955627		1.00127	0.786848	1.06767	0.944523	0.804023	0.716662	0.552911	0.734062	1.17952	1.28554	1.1151	1.11631	1.1394
aPF10_0261_0	aPF10_0261_0::PF10_0261::hypothetical protein	0.299545	0.35223	0.623015	0.493248	0.491005	0.172212	0.387928	0.608752	0.790891	0.807595	0.271394	0.309436	0.404861	0	0.478015
aPFI0730w_1	aPFI0730w_1::PFI0730w::hypothetical protein	0.894658	1.18114	1.77873	1.28271	1.22828	0.93924	1.12538	1.58932	2.04207	2.56224	1.69882	1.93586	1.7999	1.67875	1.89056
aPFF0515c_0	aPFF0515c_0::PFF0515c::hypothetical protein, conserved		0.591125	0.433231		0.396169	0.648699	0.587654	0.387068	0	0.413306	0.687617	0.664155	0.692891	0.822221	0.847275
aPFL1250c_1	aPFL1250c_1::PFL1250c::hypothetical protein	2.85495	2.28894	1.50387	1.40406	1.20686	2.68671	1.99341	1.74767	1.45638	1.08905	2.70741	2.80253	2.39909	2.46176	2.53677
aPFI0250c_2	aPFI0250c_2::PFI0250c::hypothetical protein	1.52556	1.37448	1.35205	1.31924	1.41948	1.80875	2.01134	1.67847	1.61741	1.37304	2.14636	2.28681	2.21633	2.07455	2.15739
aPFE0930w_1	aPFE0930w_1::PFE0930w::hypothetical protein, conserved	1.65015	1.71448	1.29708	1.08175	0.654673	1.71895	1.69895	1.50839	1.81121	1.60505	1.5292	1.90567	1.97804	2.12356	2.02208
aPFE0985w_1	aPFE0985w_1::PFE0985w::hypothetical protein	0.832363	0.760018	0.69762	0.515431	0.497123	0.678281	0.706721	0	0.587112	0.535016	0.889858	0.87925	0.958943	0.969265	1.02938
aPF13_0278_1	aPF13_0278_1::PF13_0278::hypothetical protein	1.02322	1.00113	0.774842	0.64331	0.584311	1.10511	0.807864	0.970016	0.820817	0.773364	1.3648	1.90567	2.03703	1.95446	1.90953
aPF14_0018_1	aPF14_0018_1::PF14_0018::hypothetical protein	0.689218	0.905577	2.16877	2.35271	2.37395	0.43317	0.860356	2.35173	3.56115	4.03671	0.309232	0.315725	0.226722	0.245073	0.199805
aPFE0320w_1	aPFE0320w_1::PFE0320w::hypothetical protein	0.701147	0.796685	0.590294	0.76597	2.1338	0.637077	0.512117	0.756542	1.30533	1.97018	0.41231	0.50189	0.524006	0.471766	0.529863
aMAL13P1.86_0	aMAL13P1.86_0::MAL13P1.86::cholinephosphate cytidylyltransferase	1.42483	1.55893	2.13605	2.15307	2.32195	1.30374	1.8513	1.81335	2.20167	3.14037	1.59966	1.86919	1.72702	1.65425	1.89436
aPFB0390w_0	aPFB0390w_0::PFB0390w::ribosome releasing factor, putative	2.31418	1.69226	1.52089	1.22399	1.15638	2.10035	1.97037	1.64093	1.22125	1.27668	2.68132	0	2.10759	2.29389	2.1283
aPFI0755c_1	aPFI0755c_1::PFI0755c::6-phosphofructokinase, putative	0.840316	0.763351	0.660972		0.500182	0	0	0	0	0.594603	0.902906	1.1824	0	0	0
aPF14_0463_2	aPF14_0463_2::PF14_0463::chloroquine resistance marker protein	2.99545	2.52561	2.30489	1.81641	1.70093	2.13416	2.72574	2.4397	2.02354	2.48871	3.10537	3.29939	2.67787	2.81957	2.78716
aMAL7P1.162_6	aMAL7P1.162_6::MAL7P1.162::dynein heavy chain, putative	0.64813	1.01113	0.965935	1.05305	1.50514	0.647642	0.346959	0.695549	0.832217	2.30741	0.598893	0.849062	0.919614	0.588176	0.421108
aPFF0565c_1	aPFF0565c_1::PFF0565c::hypothetical protein, conserved	0.387022	0.711128	1.4633	1.56587	1.51737	0.477544	0.376406	0.83982	0.846467	1.38065	0.397957	0.466669	0.425683	0.463189	0.534922
aPF10_0149_1	aPF10_0149_1::PF10_0149::cysteine -- tRNA ligase, putative	0.565954	0.443344	0.409672	0.399296	0.374754	0.768085	0.546685	0.513745	0.413258	0.389218	0.61194	0.530821	0.580687	0.551415	0.547567
aPF10_0045_3	aPF10_0045_3::PF10_0045::hypothetical protein	2.55673	2.00671	1.63083	1.43799	1.3124	2.47647	2.72574	2.50421	2.29572	2.16669	2.25987	2.13838	1.90863	1.77188	1.97023
aPF08_0117_1	aPF08_0117_1::PF08_0117::hypothetical protein	1.0166	0.965578	0.654428	0.544139	0.569015	0.915997	0.888523	0.810497	0.540086	0.608549	1.48745	1.4151	1.32216	1.28541	1.31138
aPF10_0281_0	aPF10_0281_0::PF10_0281::hypothetical protein	0.178932	0.135559	0.28533	1.15874	1.91507	0.176438	0.181801	0.201744	0.282156	0.283989	0.173535	0.193712	0.180453	0.18503	0.173249
arps2_0	arps2_0::rps2::	1.68063	0.856687	2.04312	2.4558	1.65045	0.70892	0.646547	0.505534	0.411833	0	0.229641	0.236479	0.286873	0.169101	0.255447
aPFF1315w_1	aPFF1315w_1::PFF1315w::hypothetical protein with ankyrin repeats	0.714401	0.802241	1.1675	1.32968	1.50361	0.828306	0.932053	1.05916	1.46065	1.42629	0.989021	0.86164	1.28746	1.27071	1.31897
aPFL0920c_0	aPFL0920c_0::PFL0920c::hypothetical protein	0.714401	0.767796	0.918816	0.833824	0.853522	0.698355	0.723365	1.05916	1.34808	1.64308	0.777647	0.870445	1.13014	1.0918	1.06099
aPF11_0331_1	aPF11_0331_1::PF11_0331::t-complex protein 1, alpha subunit, putative	0.547398	0.415565	0.28533	0.272722	0.246267	0.458527	0.451943	0.322557	0.208054	0.251026	0.448843	0.489311	0.42684	0.491372	0.49319
aPF11_0507_7	aPF11_0507_7::PF11_0507::antigen 332, putative	0.828387	0.66446	0.573278	0.498468	0.478768	0.846267	0.83219	0.702587	0.505885	0.452608	0.794609	0.933339	0.877971	0.816094	0.778987
aPF14_0675_0	aPF14_0675_0::PF14_0675::reticulocyte binding protein 2 homolog B, putative	3.02196	2.21672	1.80098	1.36622	1.14109	2.82089	3.01381	2.16641	1.59176	1.65322	2.95402	2.59247	2.50783	2.54754	2.68725
aPF08_0035_1	aPF08_0035_1::PF08_0035::hypothetical protein	0.132542	0.212227	1.65177	4.97554	5.69015	0.141573	0.286785	0.814016	2.10049	2.63071	0.110906	0.104403	0.104107	0.10048	0.103696
aMAL7P1.310_0	aMAL7P1.310_0::MAL7P1.310::	0.91719	0.940022	2.00647	1.04261	2.86343	0.812458	0.942295	1.45326	2.34417	2.4025	0.413614	0.480506	0.492774	0.503626	0.52354
aPFI1445w_1	aPFI1445w_1::PFI1445w::hypothetical protein	2.31816	3.00563	4.29174	3.87422	3.48751	2.47858	3.45295	4.10878	5.54621	4.74288	1.55138	1.60504	1.51303	1.14817	1.23045
aPF13_0198_1	aPF13_0198_1::PF13_0198::reticulocyte binding protein 2 homolog a	0.0450642	0.0877798	0.527469	2.78463	3.77355	0.0475431	0.0806584	0.246316	0.500185	0.693492	0.0169621	0.0150944	0	0	0
aPF14_0020_1	aPF14_0020_1::PF14_0020::choline kinase, putative	1.8145	1.52337	1.95674	1.76812	1.85236	1.78339	1.9358	2.29895	3.40297	2.97935	1.96238	1.92957	1.92367	1.89074	1.81722
aPFE0715w_0	aPFE0715w_0::PFE0715w::asparagine -- tRNA ligase, putative	3.7125	2.27005	2.06145	2.5367	2.37089	3.32696	2.67837	1.91657	2.31282	2.56224	5.18388	4.61009	6.23602	6.10355	6.24455
aPF13_0309_0	aPF13_0309_0::PF13_0309::hypothetical protein	0.528842	0.378898	0.310199	0.315783	0.308981	0.510296	0.414815	0.346015	0.323482	0.297935	0.501034	0.491827	0.471953	0.504851	0.478015
aMAL7P1.37_1	aMAL7P1.37_1::MAL7P1.37::sin3 associated polypeptide p18-like protein, putative	1.19023	0.901132	0.944993	0.732043	0.54607	1.22872	1.08953	0.954767	0.802291	0.628834	1.25781	1.43397	1.98498	2.01205	2.49504
aPFL1010c_3	aPFL1010c_3::PFL1010c::hypothetical protein	1.98018	2.12005	2.4384	2.28095	2.35101	1.83728	2.17522	3.32761	2.48525	3.6589	2.25987	2.43146	2.51014	2.48259	2.0322
aPFL0360c_0	aPFL0360c_0::PFL0360c::hypothetical protein	1.24324	2.18227	0.816726	1.08045	1.06461	2.24403	2.17906	1.14361	0.782341	1.37557	1.14038	1.08177	0.877971	1.06117	1.02558
aPF14_0062_0	aPF14_0062_0::PF14_0062::hypothetical protein	0.168328					0.197568	0.0960219	0.200572	0	0.183832	0.257041	0.314467	0.24523	0	0.395817
aPFE0735w_0	aPFE0735w_0::PFE0735w::hypothetical protein	0.483778	0.535568	0.760445	0.630261	0.787749	0.571574	0.585093	0.670918	0.423234	0.50966	0.540178	0.56101	0.436094	0.632289	0.495719
aPFE0705c_2	aPFE0705c_2::PFE0705c::helicase, belonging to UvrD family, putative	1.64352	2.32117	2.18841	1.63764	1.76517	1.44425	1.30718	1.9975	1.72999	2.1033	3.29978	3.25033	2.61193	2.91147	2.4533
aPFI0465c_0	aPFI0465c_0::PFI0465c::hypothetical protein	2.02657	1.98894	1.98422	1.48627	1.29558	1.32275	2.23283	1.68316	1.90526	1.56828	1.75232	1.67297	1.43784	1.7633	1.67052
aPF11_0123_0	aPF11_0123_0::PF11_0123::hypothetical protein	0.808506	0.792241	0.619088	0.65114	0.674558	0.767028	0.705441	0.684993	0.597087	0.576854	0.923782	1.20252	1.13593	1.36138	1.22412
aPF14_0244_1	aPF14_0244_1::PF14_0244::ABC transporter, putative	0.892007	0.946689	0.568043	0.602859	0.564426	0.742729	0.572291	0.726046	0.578562	0.679546	0.773733	0.797489	0.748415	0.446034	0.452723
aPF14_0222_0	aPF14_0222_0::PF14_0222::hypothetical protein	0.705123	1.21336	1.78397	2.06955	2.44737	0.860002	0.629904	1.84737	3.12081	4.30168	0.241384	0.242769	0.385197	0.28306	0.327529
aPF10_0097_0	aPF10_0097_0::PF10_0097::hypothetical protein	1.2777	0.817797	0.929287	0.726823	0.605725	1.10089	0.882121	0.83982	0.668339	0.780971	0.84941	0.933339	1.16947	0.923927	1.00535
aMAL13P1.262_0	aMAL13P1.262_0::MAL13P1.262::hypothetical protein	1.95897	1.28447	1.12038	0.897764	0.848933	1.60801	1.68358	1.38993	0.919144	0.902681	1.9128	1.82391	1.72934	2.17748	2.30408
aPFD0420c_0	aPFD0420c_0::PFD0420c::flap exonuclease, putative	2.30358	1.99005	1.54576	1.0413	0.962124	1.59533	2.77823	2.07257	1.95371	1.79268	3.12233	3.76229	3.74323	4.61473	4.66381
aPF10_0187_0	aPF10_0187_0::PF10_0187::ribosomal protein L30e, putative	1.44868	1.19558	0.837667	0.793372	0.614903	1.39882	1.33278	1.05564	0.602787	0.713777	1.53833	1.3673	1.24582	0.96804	1.39864
aPF14_0048_0	aPF14_0048_0::PF14_0048::hypothetical protein	0.959603	1.03891	1.63345	1.8947	1.84471	1.07447	1.03192	1.4779	1.26828	2.00314	1.26824	1.28554	1.2007	1.21556	1.20136
aPFE1390w_1	aPFE1390w_1::PFE1390w::RNA helicase-1	0.523541	0.454455	0.408363	0.551968	0.414524	0.615947	0.375126	0.477384	0.303531	0.427252	0.698056	0.587425	0.717183	0.635965	0.641147
aMAL13P1.176_2	aMAL13P1.176_2::MAL13P1.176::Plasmodium falciparum reticulocyte binding protein 2 homolog b	0.0516913	0.0944466	0.620397	2.34228	3.58387	0.0538822	0.0793781	0.254526	0.552911	0.720116	0.0169621	0.0238995	0.0208214	0.00857757	0.0417315
aPF14_0587_1	aPF14_0587_1::PF14_0587::hypothetical protein	0.685242	0.647793	0.561499	0.367979	0.357929	0.629682	0.651669	0.577083	0.544361	0.489375	0.948573	1.05158	1.02141	0.947209	1.10525
aPF14_0700_0	aPF14_0700_0::PF14_0700::hypothetical protein, conserved	1.25782	1.25558	0.784004	0.88602	0.702091	1.49602	1.30718	1.11663	1.02887	0.802524	1.69621	1.64278	1.52922	1.46309	1.33161
aPF10_0232_2	aPF10_0232_2::PF10_0232::hypothetical protein	1.0166	0.920021	1.04578	1.16396	1.58009	1.11251	1.28797	1.29726	1.1842	1.48714	1.26824	1.34215	1.34298	1.2609	1.45554
aPFE1325w_3	aPFE1325w_3::PFE1325w::hypothetical protein	1.21806	1.21225	0.972479	0.726823	0.847403	1.38931	1.2406	1.53068	1.47063	1.49221	1.76536	2.06039	2.71257	2.36128	2.91362
aPF08_0030_0	aPF08_0030_0::PF08_0030::hypothetical protein	0.174955		0.303654	0.190514		0.216585	0.160036	0	0.208054	0.297935	0.311842	0.290568	0.447661	0.415399	0.461575
aPFE1535w_1	aPFE1535w_1::PFE1535w::hypothetical protein	0.740909	0.593347	0.424069	0.46976	0.465001	0.629682	0.399451	0.48794	0.381908	0.382879	0.768514	0.701891	0.587627	0.622486	0.564007
aPF11_0393_0	aPF11_0393_0::PF11_0393::hypothetical protein, conserved	0.949	0.878909	0.764371	0.5337	0.533834	0.852606	0.757933	0.580602	0.444609	0.472893	0.630207	0.544657	0.679011	0.733995	0.765077
aPFI0655c_0	aPFI0655c_0::PFI0655c::hypothetical protein	1.36783	1.17336	0.913581	0.892544	0.838226	1.14315	0.971742	0.86797	0.592812	0.749276	1.32565	1.64026	1.53038	1.60278	1.64017
aPF11_0515_0	aPF11_0515_0::PF11_0515::rifin	0.217369		0.356009	0.292295	0.518537	0.220811	0.140832	0.229895	0.209479	0.393021	0.23486	0.221385	0	0	0
aPFE1200w_0	aPFE1200w_0::PFE1200w::hypothetical protein	1.01792	0.844464	0.764371	0.823385	0.858111	0.967766	1.00119	0.788211	0.726765	0.851968	0.838972	0.786168	0.846739	0.93618	0.999026
aPFB0195c_0	aPFB0195c_0::PFB0195c::hypothetical protein	1.16769	1.06336	0.667516	0.491943	0.521597	0.967766	0.989666	0.68382	0.528686	0.547694	1.13646	0.967301	0.742632	0.740122	0.699318
aPFF1440w_2	aPFF1440w_2::PFF1440w::SET-domain protein, putative	2.07826	1.73337	1.60597	1.16005	1.42713	2.0845	1.47874	2.12418	1.3837	1.43389	2.20768	1.89183	2.09487	1.94221	2.02081
aPFI0390c_0	aPFI0390c_0::PFI0390c::hypothetical protein	2.14983	2.52006	2.23683	2.38925	2.28371	2.05069	1.754	1.33362	1.54901	2.06146	1.80973	1.80127	1.73975	1.72532	1.80836
aPF08_0131_0	aPF08_0131_0::PF08_0131::1-cys peroxidoxin	0.683916	0.775574	0.607309	0.477589	0.46959	0.853663	0.764334	0.597023	0.431784	0.464018	0.580626	0.597488	0.588784	0.631064	0.558949
aPF10_0128_1	aPF10_0128_1::PF10_0128::hypothetical protein	0.613669	0.535568	0.509145	0.574151	0.552189	0.651869	0.642707	0.614617	0.292131	0.396825	0.657608	0.57233	0.595725	0.752375	0.661381
aPF10_0214_0	aPF10_0214_0::PF10_0214::hypothetical protein	0.701147	0.535568	0.482967	0.340576	0.39311	0.867397	0.892364	0.640421	0.668339	0.581925	0.794609	0.860382	0.888382	0.846729	0.991439
aPF13_0136_1	aPF13_0136_1::PF13_0136::hypothetical protein	0.911888	0.702239	0.611235	0.609383	0.562896	0.866341	0.804023	0.709624	0.769516	0.628834	1.15212	1.09183	0.983235	1.10038	0.991439
aPF11_0327_1	aPF11_0327_1::PF11_0327::hypothetical protein	0.927793	1.1278	1.22771	2.04868	2.55139	1.22978	0.91925	1.05564	1.15427	1.02566	1.8293	2.17486	2.11569	2.21791	2.16751
aPF14_0292_0	aPF14_0292_0::PF14_0292::hypothetical protein, conserved		0.247784	0.244756		0.286037	0	0	0	0	0.366397	0.452758	0.456606	0	0	0
aPF10_0183_0	aPF10_0183_0::PF10_0183::hypothetical protein	1.02587	0.966689	1.28268	1.31533	1.369	1.13364	1.30846	1.54358	1.34095	1.4808	0.905515	0.943402	1.10585	1.05749	1.07743
aPF14_0175_5	aPF14_0175_5::PF14_0175::hypothetical protein	1.56267	1.39003	1.42534	1.41058	1.26499	1.68514	1.56964	1.51778	1.63166	1.13849	1.2304	1.22768	1.36265	1.31604	1.42519
aMAL8P1.138_0	aMAL8P1.138_0::MAL8P1.138::hypothetical protein, conserved	2.14055	2.29561	1.96721	1.59588	1.11967	2.13521	2.16113	1.53654	1.79554	1.46939	0.932916	0.866672	0.717183	0.721741	0.757489
aPFE1485w_2	aPFE1485w_2::PFE1485w::hypothetical protein	1.91656	1.7756	1.90569	1.44451	1.41183	1.90806	2.20082	1.99164	2.15322	1.64942	1.86453	2.01636	2.23715	2.12234	2.19659
aPF10_0295_0	aPF10_0295_0::PF10_0295::hypothetical protein	0.0861522	0.160004	0.604691	1.21485	1.2864	0.101425	0.119067	0.341324	0.743865	0.680814	0.0900296	0.104403	0.0971667	0.0906772	0.108755
aPF07_0086_0	aPF07_0086_0::PF07_0086::hypothetical protein	2.06633	1.61226		1.4158	1.23439	1.62492	1.70279	1.57642	0	1.38572	1.92324	2.07674	1.91326	2.3233	2.37364
aPF10_0065_0	aPF10_0065_0::PF10_0065::hypothetical protein	0.703798	0.52779	0.452864		0.417583	0.900149	0	0.55597	0.49876	0.485571	0	0.850319	0.859463	0.740122	0.772664
aPF10_0203_0	aPF10_0203_0::PF10_0203::ADP-ribosylation factor	2.18164	2.06449	2.10071	1.5202	1.42865	1.96934	2.15345	1.92596	2.27577	2.07794	2.17767	2.11448	1.51765	1.5795	1.41381
aPF11_0460_0	aPF11_0460_0::PF11_0460::hypothetical protein	0.890682	0.510012	0.715944	0.718994	0.442057	0.783933	0.595336	0.896121	0.682589	0.529945	1.67925	1.6151	1.99192	2.23017	2.20418
aPFL0950c_2	aPFL0950c_2::PFL0950c::p-type Atpase2	1.26312	1.62782	1.82978	1.76551	1.66727	1.32698	1.70535	1.84854	1.73284	1.57208	1.32957	1.33083	1.23541	1.0918	1.17607
aPFE0745w_0	aPFE0745w_0::PFE0745w::hypothetical protein	1.40097	1.15558	1.15441	0.99824	0.789278	1.7517	1.46465	1.41925	1.21982	0.933108	1.34392	1.34969	1.60672	1.66037	1.89056
aPF10_0345_0	aPF10_0345_0::PF10_0345::merozoite surface protein-3	0.0477151	0.0311118	0.362553	0.315783	2.16134	0.041204	0.0627343	0.295579	0.272181	0.380343	0.127868	0.148429	0.0254484	0.0220566	0.0265564
aMAL8P1.144_1	aMAL8P1.144_1::MAL8P1.144::hypothetical protein	0.515588	0.633348	1.16357	3.89379	5.15937	0.453244	0.501874	0.531339	0.933394	0.99016	0.708494	0.757237	0.687108	0.71929	0.752431
aMAL13P1.103_1	aMAL13P1.103_1::MAL13P1.103::hypothetical protein	2.27574	1.85782	1.61905	1.33882	1.21604	2.47647	2.47608	2.07257	2.15892	2.07921	2.82745	2.96606	2.56682	2.81834	2.74037
aPFC0450w_0	aPFC0450w_0::PFC0450w::hypothetical protein	1.96162	1.79004	1.67795	2.31226	2.30971	1.99364	1.85642	1.45678	1.25403	0.992695	1.22649	1.15221	1.2169	1.05994	1.24815
aPFI0550w_3	aPFI0550w_3::PFI0550w::hypothetical protein	0.784648	1.34892	1.02745	0.724213	0.982009	0.734277	0.558207	0	0.50446	0.657993	0.754161	0.752206	1.07693	1.33688	1.34552
aPF14_0551_1	aPF14_0551_1::PF14_0551::hypothetical protein	1.76281	0.501123	0.89133	0.652444	0.803045	1.35022	1.50306	0.981745	0.671189	1.16258	1.07122	0	0.843269	0.959462	0.894065
aPFF0325c_2	aPFF0325c_2::PFF0325c::hypothetical protein, expressed	0.731631	0.522234	0.497365	0.459321	0.494064	0.722655	0.693918	0.646286	0.521561	0.618691	0.662827	0.787426	0.845582	0.770756	0.815661
aPF14_0741_1	aPF14_0741_1::PF14_0741::hypothetical protein		0.496678	0.825887	0.473675	1.10285	0.340197	0	0	0	0.702367	0.544092	0.535852	0	0	0
aMAL13P1.32_0	aMAL13P1.32_0::MAL13P1.32::hypothetical protein	0.258457	0.524457	0.451555		0.377813	0	0	0	0	0.381611	0.257041	0.28931	0	0	0
aPFC0355c_0	aPFC0355c_0::PFC0355c::hypothetical protein	0.280989	0.333341	1.91224	5.69976	7.12339	0.245111	0.387928	1.0228	2.37125	2.72072	0.173535	0.150944	0.146907	0.171551	0.164397
aPF11_0521_0	aPF11_0521_0::PF11_0521::erythrocyte membrane protein 1 (PfEMP1)	0.174955					#N/A	#N/A	#N/A	#N/A	#N/A	0	0.047799	0	0	0.0505836
aPFF1450w_0	aPFF1450w_0::PFF1450w::sec14-like cytosolic factor or phosphatidylinositol/phosphatidylcholine transfer protein, putative	1.70714	1.28892	1.28791	1.3088	0.998835	1.59005	1.48898	1.46499	0	1.19808	1.00076	1.03397	1.27126	1.28664	1.1748
aPF14_0733_0	aPF14_0733_0::PF14_0733::hypothetical protein	1.21806	1.11114	0.900492	4.10257	3.46609	0.70892	0	0.946557	1.27113	1.39586	0.870286	0.805036	0.81782	0.73522	0.772664
aPFA0540c_0	aPFA0540c_0::PFA0540c::hypothetical protein	1.68063	1.6367	1.24079	0.972142	0.777041	1.26253	1.01527	1.01811	0.699689	0	1.15995	2.5497	2.62003	3.03523	2.72646
aPFE0840c_3	aPFE0840c_3::PFE0840c::hypothetical protein	3.238	3.37008	2.84676	1.91688	1.94566	2.91703	2.94083	3.3757	3.04814	2.48998	3.06231	3.71449	3.15329	3.14184	3.78492
aPFF0100w_1	aPFF0100w_1::PFF0100w::putative ATP dependent RNA helicase	1.14914	0.846686	0.613853	0.661579	0.673028	1.15583	1.19963	0.958286	0.947644	0.707438	1.17821	1.07925	1.19145	1.26335	1.3215
aPF13_0340_0	aPF13_0340_0::PF13_0340::exosome complex exonuclease, putative	0.895983	0.720017	0.54841	0.553273	0.550659	0.933957	0.729766	0.652151	0.522986	0.484303	1.31391	1.07674	1.05148	1.0918	1.04202
aPFE0675c_0	aPFE0675c_0::PFE0675c::deoxyribodipyrimidine photolyase (photoreactivating enzyme, DNA photolyase), putative	1.80522	1.57004	1.01567	1.00215	0.986598	1.54568	1.63749	1.42042	1.21982	1.32486	2.80788	2.76983	2.47891	3.04136	2.82889
aPF10_0375_1	aPF10_0375_1::PF10_0375::hypothetical protein	0.744885	0.428899	0.625633	0.814251	0.850463	0.801893	0.344399	0.788211	0	0.963536	0.452758	0.363524	0.362062	0.430104	0.228891
aPFL0555c_0	aPFL0555c_0::PFL0555c::hypothetical protein	1.1054	1.02447	0.786622	0.591115	0.58584	0.911771	0.769456	0.938346	0.776641	0.811398	1.54355	1.97611	0	1.62484	1.95
aPFC0210c_0	aPFC0210c_0::PFC0210c::circumsporozoite (CS) protein	0.649455		0.774842	0.538919	0.657732	0.790272	0.720804	0.770617	0.741015	0.851968	1.2278	1.478	1.54194	1.56479	1.81469
aMAL7P1.167_2	aMAL7P1.167_2::MAL7P1.167::hypothetical protein	1.71642	2.23672	3.08235	3.00385	3.42938	1.95561	1.7412	2.61681	3.07949	2.9147	1.62445	2.00379	1.7837	1.81722	1.9892
aPF10_0224_1	aPF10_0224_1::PF10_0224::dynein heavy chain, putative	0.485103	0.462233				0	0.243255	0.429293	0.293556	0.244687	0.367947	0.528305	0.39098	0.359033	0.395817
aPFF0335c_0	aPFF0335c_0::PFF0335c::hypothetical protein	2.77013	2.87562	2.05621	1.45234	1.44548	3.07762	3.45935	2.69775	2.42967	1.99807	2.01066	2.25787	2.12379	2.00593	2.45963
aPF14_0093_1	aPF14_0093_1::PF14_0093::hypothetical protein	0.450642	0.466678	0.68584	0.801202	0.971302	0.362384	0.300869	0.662707	1.4008	2.5128	0.563664	0.547173	0.603822	0.802615	0.791633
arpl36_0	arpl36_0::rpl36::	1.91656	1.85004	2.36117	2.48451	2.0405	0.651869	0.425057	0.306136	0.299256	0.27765	0.306623	0.213838	0.233663	0.227918	0.220039
aPF14_0187_0	aPF14_0187_0::PF14_0187::glutathione s-transferase, putative	0.613669	0.545568	0.43454	0.28838	0.269211	0.702581	0.668312	0.443369	0.400433	0.341041	0.532349	0.616356	0.689421	0.698459	0.75496
aPF10_0284_2	aPF10_0284_2::PF10_0284::hypothetical protein	0.434737	0.404454	0.310199	0.267502	0.217204	0.476487	0.382807	0.381203	0.267905	0.234545	0.364033	0.479248	0.455758	0.41785	0.469163
aPFC0175w_0	aPFC0175w_0::PFC0175w::IBR domain protein, putative	1.48977	1.60115	1.41095	1.13917	1.07837	1.40411	1.52867	1.26794	1.37373	1.28936	1.15473	1.61133	1.81147	1.77923	1.93609
aPFC0245c_2	aPFC0245c_2::PFC0245c::hypothetical protein	0.889356	0.814463	1.29184	2.14002	2.33877	0.807176	0.917969	1.06971	1.47063	1.3667	0.973364	1.11699	1.0723	1.0771	1.11031
aPF14_0084_7	aPF14_0084_7::PF14_0084::hypothetical protein	1.72437	1.37225	1.57717	1.31011	1.05084	1.79713	2.00494	2.12066	1.4065	1.60632	1.14559	1.05284	1.09775	1.01705	1.21148
aMAL8P1.200_0	aMAL8P1.200_0::MAL8P1.200::	0.605716	0.572236	0.569352	0.681152	0.778571	0.633908	0.494193	0.48794	0.511585	0.559104	0.872896	0.904408	1.02603	1.04524	0.938326
aPFI0335w_1	aPFI0335w_1::PFI0335w::hypothetical protein	0.824411	0.764462	0.528777	0.478894	0.541482	0.676168	0.52748	0.511399	0.397583	0.489375	0.943354	0.969817	0.898792	0.916575	0.923151
aPFL1365w_0	aPFL1365w_0::PFL1365w::hypothetical protein	0.450642	0.611125	0.79971	1.01129	1.28334	0.41521	0.30727	0.405835	0.46741	0.471625	0.510168	0.759753	0.587627	0.698459	0.748637
aPFD0415c_0	aPFD0415c_0::PFD0415c::hypothetical protein	0.527517	0.546679	0.573278	0.447577	0.452764	0.742729	0.747691	0.490286	0.47881	0.394289	0.662827	0.652834	0.586471	0.571021	0.596886
aPFE1050w_0	aPFE1050w_0::PFE1050w::adenosylhomocysteinase(S-adenosyl-L-homocysteine hydrolase)	2.52095	2.14449	1.47508	1.04783	0.896351	2.26199	2.54394	1.56821	1.30818	1.16131	2.17637	1.99246	1.4656	1.45329	1.53521
aPF10_0348_1	aPF10_0348_1::PF10_0348::hypothetical protein	0.649455	0.506678	0.725106	1.45495	2.04968	0.617004	0.708001	0.802286	1.26115	1.50235	0.388824	0.33082	0.29497	0.302666	0.345233
aPFB0175c_1	aPFB0175c_1::PFB0175c::hypothetical protein	0.526191	0.390009	0.447628	0.426699	0.386991	0.444792	0.423777	0.450406	0.22943	0.332166	0.519301	0.55472	0.644308	0.623712	0.601945
aPFD0320c_3	aPFD0320c_3::PFD0320c::hypothetical protein	1.06696	0.917799	0.837667	0.673323	0.740331	0.759633	1.33022	1.18935	1.1614	1.56321	1.29564	1.39246	1.27358	1.55009	1.31644
aPFI1315c_0	aPFI1315c_0::PFI1315c::hypothetical protein	1.19685	1.28892	1.03661	0.831214	1.03707	1.16322	1.1561	1.10373	1.0531	1.09919	1.69099	1.62768	1.53385	1.65547	1.50233
aPF14_0362_0	aPF14_0362_0::PF14_0362::hypothetical protein	1.09877	1.36448	2.33892	2.6959	3.01792	1.00897	1.42625	2.76812	4.82087	5.7698	0.929001	0.893087	0.898792	0.988871	0.95603
aPF10_0082_0	aPF10_0082_0::PF10_0082::hypothetical protein	1.44073	1.91004	1.89653	1.77726	1.58926	1.75804	2.04719	2.8514	3.13934	2.73974	2.30163	2.38115	2.2973	2.22649	1.98161
aPFE1640w_1	aPFE1640w_1::PFE1640w::erythrocyte membrane protein 1 (PfEMP1), truncated, pseudogene	0.107359	0.188893				0.197568	0.0960219	0	0	0	0	0.182391	0	0	0
aMAL13P1.245_0	aMAL13P1.245_0::MAL13P1.245::hypothetical protein	0.250504	0.310007	0.52616	0.625042	0.699031	0.255676	0	0	0.426084	0.647851	0.272698	0.18868	0.253328	0	0.32247
aPFB0400w_1	aPFB0400w_1::PFB0400w::hypothetical protein	0.465222	0.467789	0.725106	0.382332	0.437468	0.349706	0.239415	0.355399	0.377633	0.502053	0.598893	0.594972	0.743788	0.563669	0.829571
aPFL0475w_1	aPFL0475w_1::PFL0475w::3',5'-cyclic-nucleotide phosphodiesterase, putative	1.36783	1.79671	3.40041	3.10303	3.99228	0.721598	0.871879	2.2532	4.52304	3.4738	0.905515	0.854093	0.808566	0.754826	0.558949
aPFE1055c_1	aPFE1055c_1::PFE1055c::hypothetical protein	0.808506	0.532235	0.42276	0.425394	0.386991	0.826193	0.715683	0	0	0.462751	0.850715	0.769816	0.690578	0.715614	0.765077
aPFL0035c_1	aPFL0035c_1::PFL0035c::octapeptide-repeat antigen, putative	0.0450642	0.024445	0.0235594	0.0404516	0.0795397	0.036978	0.0345679	0.0258045	0.0228005	0.0291596	0.0247908	0.0251574	0.0231349	0.0257327	0.0316147
aMAL13P1.352_0	aMAL13P1.352_0::MAL13P1.352::hypothetical protein	0.872126	0.875576	0.636104	0.485419	0.489475	0.888527	1.0332	0.661534	0.483085	0.460215	1.15212	1.21762	0.934652	0.980294	0.863715
aPF10_0290_0	aPF10_0290_0::PF10_0290::hypothetical protein	0.34726	0.561124	0.445011	0.271417		0.458527	0.22021	0.408181	0.307806	0.797453	1.57487	1.65661	2.52865	2.21669	1.65408
aPFL1600c_0	aPFL1600c_0::PFL1600c::hypothetical protein	1.30554	1.45448	1.79051	2.02258	1.58009	0.829363	1.11513	1.59753	2.77738	2.60155	0.811571	0.911955	1.04339	1.0771	1.1179
aPFE1485w_0	aPFE1485w_0::PFE1485w::hypothetical protein	1.18095	1.2467	1.27613	1.01912	1.00342	1.00052	1.33919	1.30547	1.07447	1.40727	1.48092	1.47171	1.26201	1.59788	1.51751
aPF14_0547_4	aPF14_0547_4::PF14_0547::hypothetical protein	1.66605	1.45892	1.01174	0.889934	0.683735	1.54674	1.754	1.46382	1.06307	1.08271	1.54877	1.74341	1.64027	1.7437	1.85515
aPF10_0224_5	aPF10_0224_5::PF10_0224::dynein heavy chain, putative	0.384371	0.448899	0.168842		0.284507	0.428944	0.225331	0.417564	0.262205	0	0.416224	0.440254	0.348181	0.245073	0.484338
aPF14_0079_1	aPF14_0079_1::PF14_0079::hypothetical protein	0.738258	0.526679	0.384803	0.378418	0.42982	0.489166	0.542844	0.41991	0.346282	0.385414	0.451453	0.446543	0.402548	0.482795	0.450194
aPF13_0104_1	aPF13_0104_1::PF13_0104::hypothetical protein	0.715726	0.876687	0.838976	0.535004	0.998835	0.540935	0.618381	0.66388	0.558611	0.921698	0.99685	0.901892	0.750729	0.773207	0.748637
aPF14_0755_0	aPF14_0755_0::PF14_0755::hypothetical protein	0.249179			0.135708		0.174325	0	0.20409	0.26648	0.158476	0.106992	0.163523	0.193177	0.122537	0.188424
aPFL1230w_1	aPFL1230w_1::PFL1230w::hypothetical protein	0.527517	0.363342	0.37695	0.390162	0.43135	0.43634	0.442981	0.39176	0.366232	0.386682	0.711103	0.670444	0.626957	0.681304	0.665174
aPFL0335c_0	aPFL0335c_0::PFL0335c::eukaryotic translation initiation factor 5, putative	1.67135	1.07114	1.02222	0.917337	0.913177	1.50553	1.46337	1.24683	1.08017	1.07384	1.53442	1.43271	1.49336	1.53538	1.55165
aPFC0875w_0	aPFC0875w_0::PFC0875w::hypothetical protein	0.612344	0.347786	0.311507	0.460626	0.676087	0.490222	0.391769	0.441023	0.356257	0.361326	0.339242	0.315725	0.349338	0.319821	0.376848
aPFA0210c_1	aPFA0210c_1::PFA0210c::hypothetical protein	0.990088	0.910021	1.4633	3.1748	3.84391	1.0301	1.1241	1.06737	1.58891	1.29443	0.715018	0.737111	0.684794	0.741347	0.723346
aPF11_0464_0	aPF11_0464_0::PF11_0464::hypothetical protein	2.49311	3.55897	5.31919	5.03948	5.54177	2.2229	2.80256	5.27703	7.13227	6.34412	1.11297	1.32579	0.992489	0.958237	0.891536
aPFC0925w_0	aPFC0925w_0::PFC0925w::hypothetical protein	0.766092	0.65446	0.736885	0.628956	0.697502	0.704694	0.719524	0.61579	0.669764	1.36416	1.18082	1.19875	1.04801	1.09303	1.10019
aPF10_0142_0	aPF10_0142_0::PF10_0142::hypothetical protein	0.69717	0.597792	0.452864	0.446272	0.402287	0.71209	0.542844	0.560662	0.448884	0.42852	0.588454	0.628934	0.583	0.571021	0.662645
aMAL7P1.16_0	aMAL7P1.16_0::MAL7P1.16::hypothetical protein	1.10407	0.893354	0.832432	0.623737	0.731153	0	1.16763	0.828091	0.711089	0.673207	1.49397	1.4541	1.38116	1.45451	1.51498
aMAL7P1.202_1	aMAL7P1.202_1::MAL7P1.202::	1.04708	0.914466	0.89133	0.608078	0.559837	1.21288	1.16507	1.09317	1.0588	0.873521	1.0921	1.1346	1.13361	1.07955	1.14319
aPF13_0149_0	aPF13_0149_0::PF13_0149::chromatin assembly factor 1 subunit, putative	1.79462	1.7856	1.96721	1.59588	1.27263	1.6714	1.14842	1.48845	1.84114	1.53785	0.725456	0.821388	2.3482	2.68478	2.24718
aPF14_0059_2	aPF14_0059_2::PF14_0059::hypothetical protein	0.962254	0.834464	0.736885	0.636786	0.611844	0.943466	1.046	0.892602	0.642688	0.697296	1.34001	1.46542	1.3719	1.53048	1.40243
aMAL13P1.138_0	aMAL13P1.138_0::MAL13P1.138::hypothetical protein	0.771394	0.833353	0.859918	0.601554	0.478768	0.668773	0.460905	0.403489	0.296406	0.348648	0.901601	0.973591	0.750729	0.825897	0.653793
ac1rRNA18s_1	ac1rRNA18s_1::c1rRNA18s::	0.695845	0.754462	0.838976	1.01781	1.0126	0.788159	1.03576	0.745985	1.06165	0.838022	0.491901	0.559752	0.425683	0.372512	0.35535
aMAL8P1.19_0	aMAL8P1.19_0::MAL8P1.19::hypothetical protein, conserved	0.526191	0.374453	0.333758	0.315783	0.302863	0.537765	0.501874	0.372993	0.310656	0.294132	0.735894	0.74969	0.709086	0.805066	0.784046
aPFL0280c_0	aPFL0280c_0::PFL0280c::hypothetical protein	1.39302	1.18114	0.744739	0.567627	0.604196	1.23189	1.34687	0.801113	0.627013	0.616156	0.973364	0.950949	0.754199	0.733995	0.70817
aMAL13P1.19_4	aMAL13P1.19_4::MAL13P1.19::hypothetical protein	2.73566	2.09672	1.88213	1.41841	1.32005	1.91018	2.25331	1.88959	1.56896	1.45164	1.92194	1.73334	1.68075	1.61748	1.82227
aPF10_0147_0	aPF10_0147_0::PF10_0147::FAD synthetase, putative	1.41157	1.33781	1.84287	1.94689	1.69787	1.66189	1.58116	2.07726	2.08339	2.0678	1.04513	1.10315	1.33142	1.41652	1.20768
aPF14_0208_0	aPF14_0208_0::PF14_0208::hypothetical protein, conserved	0.889356	0.80113	0.702855	0.544139	0.512419	0.940297	0.837311	0.59585	0.548636	0.46909	0.972059	0.86793	0.844425	0.803841	0.815661
aPF14_0731_0	aPF14_0731_0::PF14_0731::hypothetical protein	0.612344	0.56668	0.455482	0.428004	0.495593	0.539878	0.624783	0.561835	0.390458	0.574318	0.649779	0.811325	0.770394	0.710713	0.824513
aPF10_0337_0	aPF10_0337_0::PF10_0337::ADP-ribosylation factor-like protein	2.93183	2.52117	3.13471	3.21786	2.85272	2.83568	2.87169	3.1634	2.58358	2.67508	2.28988	1.97108	1.89012	1.98509	2.01955
aPF08_0050_1	aPF08_0050_1::PF08_0050::hypothetical protein			0.384803	0.369284	0.420642	0	0	0	0.376208	0.495714	0.387519	0.494343	0.441877	0.490147	0.491926
aPFC0145c_0	aPFC0145c_0::PFC0145c::hypothetical protein	1.48447	1.51559	2.66614	3.21133	2.93532	1.33755	1.71047	2.21919	3.31177	3.24559	1.0099	1.04026	1.15675	1.38466	1.12422
aMAL8P1.22_0	aMAL8P1.22_0::MAL8P1.22::dehydrodolichyl diphosphate synthetase, putative	3.2274	2.82673	2.27348	2.04998	2.02367	2.99627	2.97156	2.76929	2.58643	2.66367	3.21628	2.74719	2.14692	2.19586	2.07519
aPF14_0406_1	aPF14_0406_1::PF14_0406::hypothetical protein	1.16769	1.26225	0.67406	0.703335	0.890232	1.06391	0	0.647459	0.532961	0.712509	0.622379	0.691828	0.967041	0.985195	1.09766
aPF14_0220_1	aPF14_0220_1::PF14_0220::hypothetical protein	0.229297	0.404454	0.479041	0.264892	0.93918	0.311671	0.143393	0.328421	0.283581	0.650387	0.411005	0.384908	0	0.313694	0.39961
aPF10_0242_0	aPF10_0242_0::PF10_0242::hypothetical protein	1.02853	0.886687	0.705473	0.625042	0.674558	1.01637	1.05752	0.830437	0.763816	0.661797	0.987716	0.989943	1.0804	1.08568	1.0572
aPFC0690c_0	aPFC0690c_0::PFC0690c::hypothetical protein	1.8039	1.90338	2.45149	3.22047	2.7793	1.27944	2.05615	2.6825	4.21666	3.76159	1.12472	1.03019	1.11279	1.04401	1.01547
aPFF0135w_0	aPFF0135w_0::PFF0135w::hypothetical protein, conserved	0.353887	0.335563	0.380877		0.388521	0	0.204847	0.293233	0.343432	0.412038	0.258346	0.228932	0.369002	0.323497	0.333852
aPF11_0220_0	aPF11_0220_0::PF11_0220::hypothetical protein	4.40569	4.60566	4.18179	3.00385	2.61257	4.08554	3.12903	4.73278	5.09163	4.08108	6.21987	6.62394	6.35748	7.17207	6.99318
aPF14_0115_0	aPF14_0115_0::PF14_0115::hypothetical protein	1.54676	1.13114	0.910963	0.642005	0.651613	1.82882	1.50562	1.12836	1.02602	0.897609	1.58269	1.60378	1.56739	1.56357	1.66547
aPF10_0160_0	aPF10_0160_0::PF10_0160::3.8 protein	0.642828	0.558902	0.48035	0.46715	0.478768	0.792385	0.670873	0.544241	0.363382	0.398092	0.782866	0.757237	0.840955	0.854081	0.820719
aPF14_0704_0	aPF14_0704_0::PF14_0704::hypothetical protein	0.632225	0.728906	0.766989	0.627652	0.572074	0.672999	0.855235	0.717835	0.783766	0.819005	1.17821	1.62768	1.61366	1.54029	1.67558
aPFE1465w_2	aPFE1465w_2::PFE1465w::hypothetical protein	1.53749	1.46448	1.76172	1.38188	1.39347	1.60062	2.31989	2.58632	2.88996	2.9185	1.8567	1.90819	1.85542	1.66405	1.71984
aPF10_0045_1	aPF10_0045_1::PF10_0045::hypothetical protein	2.38973	2.32339	1.77743	1.49018	1.49137	2.46696	3.1572	2.87369	2.85006	2.7372	2.8418	2.86165	2.37712	2.251	2.60632
aPF11_0271_0	aPF11_0271_0::PF11_0271::hypothetical protein, conserved	1.77739	1.69115	1.25388	1.03739	0.942239	1.98624	1.91148	1.42511	1.3951	1.01678	1.38698	1.63649	1.51071	1.38589	1.47072
aPF14_0156_0	aPF14_0156_0::PF14_0156::dimethyladenosine transferase, putative	0.518239	0.448899	0.325905	0.283161	0.316629	0.427888	0.508276	0.387068	0.302106	0.346112	0.561054	0.616356	0.755356	0.800165	0.938326
aPFA0255c_1	aPFA0255c_1::PFA0255c::hypothetical protein	1.62364	1.37448	1.53529	1.27096	0.980479	1.43263	1.53507	2.07023	3.48135	3.47507	1.65446	1.51447	1.14518	1.55131	1.40496
aMAL8P1.18_0	aMAL8P1.18_0::MAL8P1.18::hypothetical protein	2.32611	1.69893	1.11645	0.842958	0.590429	1.74325	1.70407	1.20108	0.924844	0.957197	2.00936	1.90567	1.52344	1.67018	1.73375
aMAL7P1.219_0	aMAL7P1.219_0::MAL7P1.219::			0.252609			0.223981	0	0	0	0	#N/A	#N/A	#N/A	#N/A	#N/A
aMAL13P1.211_0	aMAL13P1.211_0::MAL13P1.211::hypothetical protein	0.376419	0.483345	0.612544		2.03591	0.325406	0.216369	0.401143	0	1.01298	0.700665	0.622645	0.86409	1.01093	0.948442
aPFB0230c_1	aPFB0230c_1::PFB0230c::hypothetical protein	0.687892	0.722239	0.537939	0.625042	0.706679	0.588478	0.560768	0.702587	0.488785	0.62503	0.781561	0.866672	0.650092	0.771981	0.772664
aPF14_0508_0	aPF14_0508_0::PF14_0508::pyridine nucleotide transhydrogenase, putative	0.280989	0.503345	0.383495	0.374503	0.247797	0	0.140832	0.221684	0.228005	0.425984	0	0.168554	0.168885	0.26713	0.230155
aPFE0945c_0	aPFE0945c_0::PFE0945c::hypothetical protein	0.322077	0.402232	0.654428	0.5337	0.365577	0.291598	0.256058	0	0.397583	0.368933	0.208764	0.242769	0.373629	0.446034	0.435019
aPF14_0195_2	aPF14_0195_2::PF14_0195::hypothetical protein	0.473175			1.04913	0.812222	0.419436	0.213809	0.521955	0.632713	0.796185	0.605417	0.67296	0.734534	0.758502	0.792898
aPF13_0175_0	aPF13_0175_0::PF13_0175::hypothetical protein, conserved	0.611018	0.497789	0.359935	0.365369	0.455823	0.586365	0.501874	0.353053	0.293556	0.357522	0.832448	0.723275	0.72181	0.733995	0.723346
aPF14_0270_0	aPF14_0270_0::PF14_0270::ribosomal protein L15, putative	1.46061	1.42114	1.14394	0.865141	0.82293	1.47806	0.637585	1.40283	0.902043	1.04594	1.8019	1.96228	2.00927	2.21791	1.9892
aPF14_0651_0	aPF14_0651_0::PF14_0651::hypothetical protein	0.801879	0.974467	1.0942	0.922557	0.766334	0.988896	0.993507	1.12367	1.02032	1.57969	0.632817	0.646545	0.854836	0.890842	0.859921
aPF14_0183_1	aPF14_0183_1::PF14_0183::RNA helicase, putative	0.420158	0.357786	0.306272	0.315783	0.422172	0.341254	0.318793	0.24397	0.198079	0.268776	0.597588	0.601261	0.43378	0.455837	0.457782
aPF11_0324_2	aPF11_0324_2::PF11_0324::hypothetical protein	1.22866	0.976689	0.836358	0.728128	0.674558	0.79978	0.596616	0.606406	0.547211	0.436127	0.986411	1.02894	0.690578	0.969265	0.84854
aPF10_0046_1	aPF10_0046_1::PF10_0046::hypothetical protein	1.81582		1.33896	1.2801	1.28793	1.25936	1.40064	1.51074	1.75706	1.8865	2.60564	2.82895	3.13825	3.48494	3.22344
aPF07_0088_0	aPF07_0088_0::PF07_0088::40S ribosomal protein S5, putative	0.581859	0.673349	0.463335	0.348405	0.345692	0.59376	0.672153	0.396451	0.265055	0.327095	0.810267	0.769816	0.565649	0.559993	0.613326
aPF13_0235_1	aPF13_0235_1::PF13_0235::hypothetical protein	0.581859	0.547791	0.484276	0.499772	0.50783	0.623343	0.663191	0.578256	0.588537	0.574318	0.55714	0.608809	0.713713	0.771981	0.805544
aMAL13P1.35_1	aMAL13P1.35_1::MAL13P1.35::u1 small nuclear ribonucleoprotein a, putative	0.80718	0.875576	0.895257	0.801202	0.706679	1.01425	1.0396	0.77179	0.688289	0.929305	0.926392	0.963528	1.03876	1.05872	1.20136
aPFE0670w_0	aPFE0670w_0::PFE0670w::hypothetical protein	0.36449	0.501123	0.57197		0.289096	0.282089	0.199726	0.308481	0.270756	0.43993	0.374471	0.288052	0.305381	0.323497	0.452723
aPF11_0414_1	aPF11_0414_1::PF11_0414::hypothetical protein	2.23996	2.02116	1.42927	1.37796	1.24663	2.14472	2.22003	1.82508	1.75849	1.60124	1.61009	1.29938	1.35224	1.71306	1.60097
aPFD0125c_0	aPFD0125c_0::PFD0125c::rifin	0.213392	0.363342			0.315099	0.30005	0.320073	0.234587	0	0	0.276613	0.388682	0.327359	0.453386	0.421108
aPFE1130w_0	aPFE1130w_0::PFE1130w::hypothetical protein	4.50112	4.969	5.71315	9.38346	8.13752	3.01318	4.40933	4.96151	7.97161	8.47277	2.21812	1.95347	1.69116	1.67875	1.76537
aPF08_0109_1	aPF08_0109_1::PF08_0109::hypothetical protein	1.77739	1.58226	1.93056	1.64547	1.41642	1.54779	1.89611	1.86848	2.52088	2.47096	2.55345	3.01134	2.36439	2.31227	2.275
aPF14_0124_1	aPF14_0124_1::PF14_0124::actin II	0.368466	0.384453	0.336376	0.317088	0.31204	0.36661	0.376406	0.383549	0.354832	0.303007	0.354899	0.405034	0.367846	0.382315	0.397081
aPF14_0300_1	aPF14_0300_1::PF14_0300::syntaxin, putative	1.16107	0.88002	0.933214	0.685067	0.74339	1.35551	1.22268	1.01341	0.96617	0.854504	1.50049	1.33586	1.52228	1.55377	1.53521
aMAL8P1.110_0	aMAL8P1.110_0::MAL8P1.110::plastid 50S ribosomal protein L33, putative	1.19818	1.2367	1.04578	1.04652	1.1212	1.14315	1.30078	1.54827	1.90954	1.94609	1.28912	1.15095	1.27705	1.31972	1.3177
aPFC0150w_0	aPFC0150w_0::PFC0150w::hypothetical protein, conserved	1.4076	1.50337	2.46588	2.86815	2.273	1.52138	1.88459	2.22975	3.38302	3.11628	1.52007	1.61636	1.58821	1.5844	1.58074
aPFI0225w_0	aPFI0225w_0::PFI0225w::hypothetical protein	0.952976	0.842242	0.941067	0.931691	0.933062	1.0956	1.16635	1.12484	1.264	1.24245	1.5031	1.678	1.6796	1.76085	1.76284
aPF07_0089_0	aPF07_0089_0::PF07_0089::hypothetical protein	0.621622	0.872243	0.755209	0.948654	0.946828	0.910714	0.819387	1.07323	1.22552	1.1106	1.08296	1.21762	1.39966	1.48024	1.40243
aPF10_0049_1	aPF10_0049_1::PF10_0049::hypothetical protein	1.10275	1.11447	0.524851	0.626347	0.832107	1.5404	1.15866	0.482075	0.49021	0.911555	0	0.313209	0.379413	0.35168	0.379377
aPFI0885w_0	aPFI0885w_0::PFI0885w::heme binding protein, putative	1.2512	1.27003	1.44105	1.47713	1.60609	1.14949	1.43009	1.67026	1.94659	2.55591	1.13907	1.13082	0.91036	1.04891	0.815661
aPFB0380c_1	aPFB0380c_1::PFB0380c::hypothetical protein	2.08223	1.69782	1.89391	1.66112	1.63515	1.03221	2.11376	2.41624	1.99504	2.26177	1.72883	1.81636	2.01274	2.13214	1.94747
aPFB0700c_1	aPFB0700c_1::PFB0700c::hypothetical protein	1.45266	1.4467	2.29835	2.38403	2.60798	1.3143	1.50562	2.01041	2.5907	2.49125	1.39872	1.64781	1.57665	1.46309	1.7072
aPF11_0408_1	aPF11_0408_1::PF11_0408::hypothetical protein	1.58918	1.32225	1.21854	0.879495	0.764804	1.34811	1.60293	1.40869	1.18135	1.39966	1.6649	2.39498	2.34357	2.13091	2.52918
aPF13_0215_0	aPF13_0215_0::PF13_0215::hypothetical protein	0.877427	0.768907	0.718561	0.940825	1.37206	0.826193	0.976863	0.728391	0.632713	0.807595	0.799828	0.949691	0.879128	0.870011	0.982586
aMAL13P1.134_0	aMAL13P1.134_0::MAL13P1.134::helicase, putative	1.28566	0.905577	0.941067	0.803812	0.702091	1.27204	1.20091	1.14126	0.798016	0.811398	0.874201	1.14466	0.972824	1.00235	1.12675
aMAL7P1.17_2	aMAL7P1.17_2::MAL7P1.17::hypothetical protein	2.3725	3.13452	3.02607	2.71678	2.74718	0	3.78966	4.18972	4.11833	5.25507	1.67794	1.69938	1.50955	1.67385	1.69834
aMAL13P1.52_2	aMAL13P1.52_2::MAL13P1.52::hypothetical protein	0.440039	0.387787	0.286639	0.276636	0.281448	0.428944	0.400731	0.340151	0.272181	0.256098	0.504949	0.503148	0.436094	0.488921	0.483073
aPF10_0361_1	aPF10_0361_1::PF10_0361::hypothetical protein	0.869475	0.706683	0.513071	0.362759	0.43135	0.831476	0.821947	0.586467	0.446034	0.494446	0.70197	0.97988	0.899949	0.931279	0.902917
aPF10_0167_1	aPF10_0167_1::PF10_0167::hypothetical protein	0.644154	1.02002	0.827196	0.718994	0.582781	0.727937	0.650388	0.608752	0.805141	1.59237	0.521911	0.782394	0.697518	0.503626	0.821983
aPFD0830w_0	aPFD0830w_0::PFD0830w::bifunctional dihydrofolate reductase-thymidylate synthase	1.90728	0.766685	0.976406	0.989106	0.562896	1.68725	2.60795	1.87552	1.82404	0.82788	0.925087	0.914471	1.66803	1.40182	1.3607
aPF13_0233_0	aPF13_0233_0::PF13_0233::myosin a	0.0768743	0.0822241	0.387421	2.18177	4.27985	0.0813515	0.0973022	0.188842	0	0.537551	0.0613245	0.0817615	0.0751886	0.0710713	0.0784046
aPFE0450w_2	aPFE0450w_2::PFE0450w::chromosome condensation protein, putative	2.23333	2.09338	1.92925	1.13134	1.06461	2.68249	2.78464	2.57576	2.11617	1.7407	3.43026	4.27801	4.95782	4.68703	5.87023
aPFI0590c_0	aPFI0590c_0::PFI0590c::hypothetical protein	0.805855	0.653349	0.530086	0.524565	0.575133	0.692016	0.61198	0.54776	0.494485	0.507124	0.93422	0.933339	0.868717	0.992547	0.983851
aMAL13P1.356_0	aMAL13P1.356_0::MAL13P1.356::erythrocyte membrane protein 1 (PfEMP1)			0.163607			#N/A	#N/A	#N/A	#N/A	#N/A	#N/A	#N/A	#N/A	#N/A	#N/A
aMAL13P1.328_1	aMAL13P1.328_1::MAL13P1.328::hypothetical protein	1.14516	1.58781	1.93056	2.43231	3.33608	1.06919	1.46337	2.10307	2.66765	3.27729	0.739809	0.642771	0.677854	0.51833	0.657587
aPFL1935c_1	aPFL1935c_1::PFL1935c::hypothetical protein	1.15179	1.02002	1.0785	0.867751	0.787749	1.59533	1.42881	1.28202	0.96332	0.974946	0.955097	0.925792	0.808566	0.705811	0.768871
aPFF0295c_0	aPFF0295c_0::PFF0295c::hypothetical protein	0.542096	0.544457	0.828505	0.981276	1.03555	0.538822	0.738729	1.04743	1.81121	1.97778	0.986411	1.0868	1.16137	1.14449	1.14951
aPFL2190c_2	aPFL2190c_2::PFL2190c::hypothetical protein	0.217369	0.214449	0.301037	0.238795	0.204968	0.234546	0.170279	0.19588	0.195229	0.349916	0.152659	0.222643	0.205901	0	0.275681
aMAL13P1.339_0	aMAL13P1.339_0::MAL13P1.339::hypothetical protein	0.262433		0.382186	0.384942	0.465001	0	0.170279	0.288542	0	0.481768	0.747637	0	0.77155	0.714389	0.983851
aPFI0495w_1	aPFI0495w_1::PFI0495w::hypothetical protein	1.57195	1.67337	1.40833	0.947349	0.985068	1.65133	1.66694	1.51895	1.53048	1.46939	2.39557	2.74593	2.94045	3.0046	3.02363
aPFA0385w_1	aPFA0385w_1::PFA0385w::hypothetical protein	1.04045	1.61448	1.37692	1.03217	1.12579	1.06602	0.992226	1.03101	0.74529	0.7759	1.37784	1.39498	1.16369	0.957012	1.11663
aPF07_0039_0	aPF07_0039_0::PF07_0039::hypothetical protein	2.40033	1.98671	1.74078	1.28401	0.991187	2.10457	1.80777	1.47672	1.39653	1.09158	1.68447	1.72076	1.74669	1.80374	1.8893
aPF11_0426_0	aPF11_0426_0::PF11_0426::hypothetical protein	0.844292	1.1378			0.448175	0.638134	0.692638	0.602888	0.47881	0.873521	1.35958	1.66164	1.34992	1.58562	0
aMAL13P1.225_0	aMAL13P1.225_0::MAL13P1.225::thioredoxin, putative	0.422809	0.406676	0.375641	0.515431	1.04013	0.46064	0.457064	0.337805	0.334882	0.332166	0.397957	0.522016	0.489304	0.464414	0.571595
aMAL8P1.1_2	aMAL8P1.1_2::MAL8P1.1::conserved hypothetical protein, conserved in P. falciparum	0.259782		0.318052	0.262283	0.307451	0	0.104984	0.178286	0	0.229474	0.251822	0.303146	0.202431	0.269581	0.312354
aPF11_0357_1	aPF11_0357_1::PF11_0357::hypothetical protein	0.911888	0.894465	0.938449	1.2266	1.22981	0.751181	0.649108	1.32776	2.15037	2.22627	0.708494	0.831451	0.862933	0.999899	0.919357
aPFI0825w_0	aPFI0825w_0::PFI0825w::hypothetical protein	1.10142	1.06002	0.969862	0.814251	0.70515	1.15054	1.34047	1.24214	1.28965	1.26781	1.49266	1.41133	1.30597	1.4202	1.46313
aPFL1645w_3	aPFL1645w_3::PFL1645w::hypothetical protein	1.27638	0.994468	0.908345	0.926471	0.728094	1.10511	1.22268	1.03922	1.05025	0.99016	1.40916	1.61385	1.41933	1.57705	1.64523
aPF13_0273_0	aPF13_0273_0::PF13_0273::hypothetical protein, conserved	1.01527	0.650015	0.68584	0.428004	0.445116	0.961427	0.983264	0.720181	0.431784	0.479232	1.19779	1.21636	1.22847	1.1739	1.38473
aPF11_0375_0	aPF11_0375_0::PF11_0375::hypothetical protein	0.999366	0.940022	0.920125	1.12873	1.45772	1.13681	1.06392	1.13657	1.02745	0.974946	1.35175	1.36227	1.42627	1.36016	1.34047
aPF14_0171_1	aPF14_0171_1::PF14_0171::hypothetical protein	1.65545	1.27114	2.60855	2.47537	1.61221	1.5013	1.52483	2.60274	2.35415	2.6941	1.25259	1.24277	1.12551	1.15184	1.12549
aPFL0075w_1	aPFL0075w_1::PFL0075w::XPA binding protein 1, putative	0.381721	0.326674	0.332449	0.336661	0.298274	0.536709	0.363603	0.384722	0.312081	0.394289	0.52452	0.539626	0.698675	0.671501	0.623443
aPF13_0090_0	aPF13_0090_0::PF13_0090::ADP-ribosylation factor, putative	0.279663	0.278895	1.32325	4.28395	4.87333	0.208133	0.248377	0.563008	0.929119	1.17272	0.189193	0.176102	0.173512	0.188707	0.192218
aPFA0470c_0	aPFA0470c_0::PFA0470c::cold-shock protein, putative	0.573906	0.530012	0.748665	0.561102	0.491005	0.447962	0.363603	0.500842	0.447459	0.518534	0.600197	0.558494	0.535574	0.556317	0.722081
aPF14_0631_2	aPF14_0631_2::PF14_0631::hypothetical protein	1.15974	1.14336	1.07719	1.49018	1.58315	0.819854	1.1433	1.44857	1.88959	2.11471	0.734589	0.898118	0.888382	1.0722	0.863715
aPFC0395w_1	aPFC0395w_1::PFC0395w::asparagine synthetase, putative	0.907912	0.716683	0.531395	0.424089	0.39005	0.879019	0.943575	0.677955	0.578562	0.485571	0.78939	0.781137	0.787745	0.798939	0.805544
aPF10_0338_0	aPF10_0338_0::PF10_0338::hypothetical protein	1.98415	2.30561	2.81535	2.07477	2.16287	1.56787	1.8385	1.71483	2.2544	2.31249	1.51615	1.7824	1.51881	0	1.58453
aPF14_0487_0	aPF14_0487_0::PF14_0487::hypothetical protein	0.849594	0.704461	0.675369	0.463236	0.569015	0.978331	0.939734	0.783519	0.73959	0.655458	1.17691	1.43271	1.42858	1.31972	1.39864
aMAL13P1.88_1	aMAL13P1.88_1::MAL13P1.88::hypothetical protein	1.40892	1.1278	1.14525	0.833824	0.988127	1.05229	1.41856	1.44036	1.43358	1.48714	2.33294	2.42643	2.18741	2.17258	2.25729
aMAL8P1.81_0	aMAL8P1.81_0::MAL8P1.81::hypothetical protein, conserved	1.34928	1.80338	1.92533	2.09435	2.54527	1.18752	2.14577	1.89781	1.80694	2.51787	0.600197	0.550947	0.407175	0.388441	0.395817
aPFF1370w_4	aPFF1370w_4::PFF1370w::P. falciparum PK4 protein kinase	1.66208	1.45003	1.50126	1.14439	1.05084	1.55941	1.76936	1.49314	1.52906	1.32613	1.44961	1.63649	1.39157	1.40795	1.58327
aPFC0120w_1	aPFC0120w_1::PFC0120w::Cytoadherence linked asexual protein, CLAG	2.78736	3.35897	5.55216	5.73238	5.11348	2.56204	3.5797	4.00674	6.35848	4.8798	1.30869	1.20378	1.03413	0.882264	0.847275
aPF11_0445_0	aPF11_0445_0::PF11_0445::DNA-directed RNA polymerase I, putative	1.00599	0.820019	0.700237	0.658969	0.564426	0.880075	0.690077	0.843339	0.755265	0.783507	0.747637	0.813841	0.822447	0.9178	0.86245
aPFE1460w_0	aPFE1460w_0::PFE1460w::hypothetical protein	1.02587	1.10669	0.927978	0.561102	0.833637	1.21922	1.14458	0.870316	0.631288	0.831683	1.06861	0.968559	0.800469	0.861433	0.924415
aPFL1955w_1	aPFL1955w_1::PFL1955w::erythrocyte membrane protein 1 (PfEMP1)	0.405578	0.278895	0.151827	0.29882	0.133076	0.558895	0.435299	0.540722	0	0.112835	0.217898	0.28931	0.268365	0.140917	0.145428
aPFI0225w_2	aPFI0225w_2::PFI0225w::hypothetical protein	0.872126	0.65446	0.819343	1.72506	2.0818	0.836758	0.843712	0.85976	1.0075	0.948322	0.678484	0.97988	1.16369	1.13959	1.17354
aPFL0955c_0	aPFL0955c_0::PFL0955c::phosphatidylethanolamine-binding protein, putative	0.397626	0.33223	0.407054	0.404516	0.770923	0.320123	0.294467	0.228722	0.206629	0.327095	0.490596	0.48428	0.29497	0.340652	0.395817
aPFI1010w_1	aPFI1010w_1::PFI1010w::hypothetical protein	1.45001	1.37781	2.36248	2.73635	2.67376	1.34494	1.22012	1.35122	1.92949	1.4732	0.888553	1.36479	1.33836	1.15552	1.19504
aPFB0050c_0	aPFB0050c_0::PFB0050c::stevor isoform gam beta	0.296894	0.404454	0.379568	0.335356	0.27227	0.197568	0.224051	0.382376	0.256505	0.314417	0.290965	0.275473	0.115675	0	0.131517
aPFE0655w_2	aPFE0655w_2::PFE0655w::hypothetical protein	1.21673	0.933355		1.24095	0.965183	1.18013	1.27005	1.41573	1.07305	1.08525	1.24737	1.11825	1.23888	1.169	1.21148
aPFI1265w_0	aPFI1265w_0::PFI1265w::hypothetical protein	2.122	1.63448	1.08635	0.987801	1.04778	1.57103	1.75656	1.34184	1.15712	1.21203	1.89976	2.11448	2.01852	2.03411	2.37616
aPFF0445w_4	aPFF0445w_4::PFF0445w::hypothetical protein	1.67003	1.53226	1.52612	1.38579	1.21757	1.6228	1.69767	1.72538	1.66301	1.2602	1.74057	1.70693	1.74322	1.56602	1.87412
aPFI0170w_1	aPFI0170w_1::PFI0170w::hypothetical protein	0.681265	0.66446	0.623015	0.420174	0.449705	0.753294	0.816826	0.669745	0.541511	0.494446	0.780257	0.884282	0.899949	0.874912	0.913034
aPFL1340c_1	aPFL1340c_1::PFL1340c::hypothetical protein	1.05768	1.36781	1.68319	1.69505	2.14298	1.04172	1.62597	2.1277	2.97689	3.34955	1.04643	0.937112	0.904576	0.832024	0.876361
aPF14_0439_1	aPF14_0439_1::PF14_0439::leucine aminopeptidase, putative	0.926468	0.788907	0.604691	0.580676	0.341103	0.854719	0.841152	0.636903	0.615613	0.452608	0.681094	0.647803	0.660503	0.680079	0.691731
aPF11_0360_0	aPF11_0360_0::PF11_0360::hypothetical protein	1.1213		0.985568	0.639396	1.18239	0.682507	0.56845	0.970016	1.23693	1.98793	1.98065	1.36353	1.30365	1.03176	1.35438
aPF10_0066_0	aPF10_0066_0::PF10_0066::hypothetical protein	0.949	0.651126	0.562808	0.696811	0.680676	0.738503	0.642707	0.550106	0.477385	0.527409	0.574102	0.70818	0.532104	0.590627	0.534922
aPFL2370c_0	aPFL2370c_0::PFL2370c::hypothetical protein	2.01994	1.66004	1.44105	1.2279	1.22063	1.49919	1.83338	1.68433	1.51623	1.4377	1.8293	1.61888	1.32563	1.21066	1.16975
aPFC0060c_1	aPFC0060c_1::PFC0060c::Serine/threonine protein kinase, putative	1.21011	1.10669	1.45152	1.39232	1.22522	1.03327	1.35967	1.32424	1.207	0	0.853324	0.830194	0.724124	0.740122	0.528599
aPFL0325w_1	aPFL0325w_1::PFL0325w::hypothetical protein	1.15842	1.53892	1.45152	0.862532	2.11698	0.723711	0.869318	1.1483	0	2.34291	1.28651	1.1824	0.85715	1.082	0.744843
aPFE1530c_0	aPFE1530c_0::PFE1530c::hypothetical protein, conserved	0.661384	0.463344	0.405745	0.319698	0.316629	0.568404	0.459625	0.458617	0.265055	0.319488	0.598893	0.65535	0.616546	0.745023	0.743579
aPFL1990c_2	aPFL1990c_2::PFL1990c::hypothetical protein	1.27505	2.16449	3.4593	3.19959	2.59422	0.969879	1.0524	0	4.89212	4.95714	0.781561	0.942144	0.950846	0.993773	1.1963
aPF14_0486_0	aPF14_0486_0::PF14_0486::elongation factor 2	0.8708	0.825575	0.515689	0.409735	0.360988	0.938184	0.844993	0.47973	0.377633	0.325827	0.631512	0.616356	0.640838	0.680079	0.641147
aPF11_0067_1	aPF11_0067_1::PF11_0067::hypothetical protein	0.353887	0.275562	0.255227	0.614603	1.03402	0.353932	0.322634	0.287369	0.302106	0.313149	0.391433	0.363524	0.366689	0.365159	0.378112
aPFF0740c_0	aPFF0740c_0::PFF0740c::hypothetical protein	2.5448	2.11783	1.88868	0.904288	1.25887	2.5145	2.8256	2.04677	1.59176	1.5873	1.94542	2.34593	1.99655	2.13704	1.90953
aPF11_0488_2	aPF11_0488_2::PF11_0488::hypothetical protein	1.46326	1.48115	1.42011	1.19528	0.97742	1.44425	1.38015	1.31955	1.24833	1.09032	1.49006	2.53838	2.10759	2.5022	2.31926
aPFC0820w_0	aPFC0820w_0::PFC0820w::hypothetical protein	0.906587	1.07002	3.28653	3.37183	3.48751	0.765972	1.08697	1.92596	3.29039	3.86809	0.712408	0.794973	0.86756	0.71929	0.723346
aPF13_0139_0	aPF13_0139_0::PF13_0139::hypothetical protein	0.776696	1.17003	1.2264	0.682457	0.792337	0.965653	0	0.806978	0.806566	0.884931	1.08427	1.34089	1.22615	1.3332	1.43531
aPF11_0479_0	aPF11_0479_0::PF11_0479::hypothetical protein	1.11468	1.61559		1.44843	1.59691	1.13681	1.28925	1.53654	1.75279	2.26431	1.20692	1.22516	1.37769	1.53538	1.73375
aPF14_0438_1	aPF14_0438_1::PF14_0438::hypothetical protein	0.387022	0.41001	0.366479	0.409735	0.628669	0.288428	0.22021	0.442196	0.386183	0.600942	1.10384	1.15347	1.17873	1.32952	1.26459
aMAL13P1.380_10	aMAL13P1.380_10::MAL13P1.380::chloroquine resistance marker protein, putative	0.640177	0.636682	2.36772	1.9743		0.459583	0.512117	1.04274	2.52943	2.88554	0.417529	0.364782	0.289187	0.204636	0.252918
aPFA0020w_0	aPFA0020w_0::PFA0020w::rifin	0.0835014			0.0952569	0.145313	0.0982557	0.0896204	0.0938346	0.096902	0.101425	0.0874201	0.0805036	0.0451131	0.0563669	0
aPFL0100c_1	aPFL0100c_1::PFL0100c::ATP dependent RNA helicase, putative	1.05901	0.895576	0.73165	0.70203	0.573603	0.906488	0	0.812843	0.584262	0.548962	0.858543	0.943402	0.901106	0.900645	0.800485
aPFI0805w_1	aPFI0805w_1::PFI0805w::hypothetical protein	1.9709	1.5767	0.9607	0.842958	0.631728	2.16691	1.85002	1.08614	0.920569	0.807595	1.08818	1.06919	1.30712	1.47657	1.28482
aPF08_0117_0	aPF08_0117_0::PF08_0117::hypothetical protein	0.996715	0.763351	0.647883	0.428004	0.483356	0.805063	0.750251	0.600542	0.48451	0.618691	1.32696	1.38114	1.21111	1.37976	1.4429
aPFC0230c_1	aPFC0230c_1::PFC0230c::hypothetical protein	1.69521	1.5367	1.23818	0.729433	0.777041	1.31008	1.46593	1.08144	0.806566	0.824076	1.66098	1.91196	1.70967	1.8258	1.90068
aPFL0385c_1	aPFL0385c_1::PFL0385c::blood stage antigen 41-3 precursor	0.311473	0.541124	0.621706	0.319698	0.481827	0.341254	0.387928	0.343669	0.320632	0.645315	0.61194	0.654092	0.540201	0.450935	0.670233
aPF08_0114_2	aPF08_0114_2::PF08_0114::hypothetical protein	1.17167	1.05225	1.16095	0.8273	0.752568	1.68303	1.21116	1.28905	1.09015	0.872253	1.12994	1.10567	1.0723	0.948434	1.0572
aMAL7P1.89_3	aMAL7P1.89_3::MAL7P1.89::hypothetical protein	0.426785	0.804463	0.833741	0.801202	1.05696	0	0.240695	0.412872	0.608487	0.682082	1.10515	1.02642	1.15675	1.1641	1.13434
aPF13_0181_1	aPF13_0181_1::PF13_0181::hypothetical protein, conserved	0.265084		0.671443	0.893849	1.03402	0.728994	0.309831	0.60406	0.50161	0.704902	1.31652	1.76353	2.14461	2.23139	2.08784
aPFC0165w_2	aPFC0165w_2::PFC0165w::hypothetical protein	2.13127	1.72337	1.53398	1.27749	1.06308	1.96194	2.13169	1.8462	1.66443	1.38318	2.15419	1.91196	2.06942	2.25835	2.02967
aPF13_0101_2	aPF13_0101_2::PF13_0101::hypothetical protein	0.930444	1.04447	0.958082	0.733348	0.793867	0.813515	0.708001	0.996993	0.956194	1.27668	1.83713	1.83146	1.4309	1.63954	1.8286
aPF14_0083_0	aPF14_0083_0::PF14_0083::ribosomal protein S8e, putative	0.987437	0.867798	0.58244	0.353625	0.408406	0.903319	0.930772	0.483248	0.342007	0.393021	0.84941	0.798747	0.621173	0.564894	0.576653
aPF14_0631_1	aPF14_0631_1::PF14_0631::hypothetical protein	0.523541	0.802241	0.236903	0.905593	1.24816	0.660321	0.704161	0.941865	0.856442	1.25133	0.142221	0.5195	0.646622	0.773207	0.770135
aPFC0830w_0	aPFC0830w_0::PFC0830w::trophozoite stage antigen, PFC0830w	0.0516913	0.0522234	0.302346	1.77204	3.71695	0.0876906	0.0550526	0.14779	0	0.362594	0.0430576	0.0515726	0.0555239	0.0575922	0.0796692
aPF10_0170_0	aPF10_0170_0::PF10_0170::hypothetical protein	0.0583184	0.0722239	0.408363	2.28486	4.46493	0.0655038	0.0793781	0.14779	0.247955	0.434859	0.0508863	0.0490569	0.0485834	0.0465639	0.0518482
aPF11_0222_0	aPF11_0222_0::PF11_0222::hypothetical protein	0.34726	0.613348	0.448937	0.491943	0.578192	0.465922	0.316232	0.629865	0.521561	0.749276	1.78754	2.28177	3.56625	3.89912	3.3929
aPFD0005w_3	aPFD0005w_3::PFD0005w::erythrocyte membrane protein 1 (PfEMP1)	0.125915				0.185083	#N/A	#N/A	#N/A	#N/A	#N/A	0	0.116982	0	0	0
aPF14_0519_0	aPF14_0519_0::PF14_0519::ribosomal protein S11, putative	0.947675	1.23447	0.709399	0.679847	0.751038	0.947692	0.670873	0.676782	0.658363	0.789846	1.4209	1.58617	1.55698	1.38344	1.4606
aPF10_0217_0	aPF10_0217_0::PF10_0217::pre-mRNA splicing factor, putative	1.03515	0.783352	0.544484	0.430613	0.402287	0.886414	0.882121	0.629865	0.451734	0.508392	1.0934	0.952207	0.865247	0.927603	0.924415
aPFI0215c_0	aPFI0215c_0::PFI0215c::signal peptidase, putative	2.03982	1.88227	1.74601	1.45234	1.42101	0.965653	2.30965	1.94238	1.69721	1.49221	1.68969	1.57485	1.59978	1.56357	1.54154
aPF10_0195_1	aPF10_0195_1::PF10_0195::hypothetical protein	0.523541	0.792241	2.1439	1.28793	2.16746	0.499731	0.468587	1.07206	0.866418	2.00821	0.430576	0.509437	0.39098	0.377413	0
aPFE0965c_0	aPFE0965c_0::PFE0965c::vacuolar ATP synthetase, putative	1.47122	1.27892	1.36644	1.69505	1.7514	1.47489	1.46081	1.19287	1.35663	1.15497	1.22388	1.04906	0.772707	0.791587	0.709435
aPF14_0096_0	aPF14_0096_0::PF14_0096::hypothetical protein	1.09082	1.19114	0.873006	0.596334	0.709739	1.09877	0.828349	0.761234	0.705389	0.767025	1.46918	1.76731	1.49683	1.56357	1.5858
aPFB0150c_1	aPFB0150c_1::PFB0150c::protein kinase, putative	0.320751	0.408898	1.54052	2.12958	3.73378	0.346536	0.30471	0.561835	0.987545	1.13469	0.250517	0.315725	0.230193	0.265905	0.325
aPFC0960c_2	aPFC0960c_2::PFC0960c::hypothetical protein	2.1485	1.95449	2.11642	1.58544	1.7514	2.00526	1.57988	2.16054	1.78271	2.11851	2.94097	2.53586	2.62813	2.2461	2.06508
aMAL13P1.322_1	aMAL13P1.322_1::MAL13P1.322::splicing factor, putative	0.791275	0.911132	0.968553	0.831214	0.792337	0.829363	0.917969	0.916061	1.14572	0.991427	1.10123	1.2302	1.18798	1.2413	1.27977
aPF11_0196_0	aPF11_0196_0::PF11_0196::hypothetical protein	0.372443		0.513071	0.636786	0.558307	0.325406	0.257339	0.398797	0.399008	0.858307	0.337937	0.358493	0.345867	0.495048	0.537451
aMAL7P1.170_0	aMAL7P1.170_0::MAL7P1.170::ring stage expressed protein	0.0781997	0.0866687	0.062825	0.109611	0.175905	0.107764	0.0998628	0.121985	0.0741015	0.0824076	0.070458	0.0779879	0.0705616	0.0673952	0.07714
aMAL8P1.148_0	aMAL8P1.148_0::MAL8P1.148::hypothetical protein	0.518239	0.721128	0.763062	0.812946	0.711268	0.675112	0.52748	0.64394	0.538661	0.782239	0.948573	0.789942	0.820134	0.882264	0.870038
aPFL0410w_0	aPFL0410w_0::PFL0410w::hypothetical protein			0.28533	0.392772	0.97895	0	0	0	0.188104	0.299203	0.11482	0.147171	0	0	0
aPFE1140c_0	aPFE1140c_0::PFE1140c::G10 protein, putative	2.2996	2.09005	1.64	1.3623	1.33076	1.76332	1.78985	1.50135	0.987545	1.36163	2.1033	1.69309	1.43784	1.67998	1.55924
aMAL13P1.114_0	aMAL13P1.114_0::MAL13P1.114::hypothetical protein	1.16107	1.64782	2.68184	2.67241	2.43667	1.24246	1.54531	3.36163	4.05991	4.26111	0.707189	0.628934	0.855993	0.86756	0.856127
aPF10_0014_0	aPF10_0014_0::PF10_0014::hypothetical protein	0.0198813	0.0266673	0.0327214	0.0339271	0.0428291	0	0.0345679	0.0398797	0.0299256	0.0316953	0.0326194	0.0339625	0	0.0159298	0.0227626
aPF14_0303_0	aPF14_0303_0::PF14_0303::hypothetical protein	2.12862	1.96116	3.59804	2.83944	2.93379	2.18487	2.0139	3.08951	3.5469	3.65129	1.62575	1.58366	1.49567	1.53293	1.46819
aMAL13P1.360_0	aMAL13P1.360_0::MAL13P1.360::hypothetical protein, conserved	1.39302	1.35892	1.34289	1.57239	2.4795	1.18646	1.50818	1.25152	1.39368	1.49348	1.30478	1.42768	1.42164	1.34668	1.46819
aMAL13P1.360_1	aMAL13P1.360_1::MAL13P1.360::hypothetical protein, conserved	1.13853	1.13003	1.0052	1.86338	2.247	1.18329	1.19963	1.19874	1.38798	1.44657	1.00729	0.88554	1.12667	1.20821	1.06731
aPF11_0262_0	aPF11_0262_0::PF11_0262::hypothetical protein	2.56866	2.0856	1.70544	1.468	1.16709	1.88376	1.40704	2.11245	1.93519	1.60885	2.83137	2.59373	2.58302	2.46544	2.40019
aPF14_0261_0	aPF14_0261_0::PF14_0261::proliferation-associated protein 2g4, putative	1.10938	0.682238	0.606	0.557188	0.532304	0.870567	0.926931	0.818707	0.802291	0.897609	1.0373	0.983654	0.961257	0.949659	0.995232
aPF10_0343_0	aPF10_0343_0::PF10_0343::S-antigen	0.00397626	0.00333341	0.0405745	0.00782933	0.00611844	0.00528257	0.00384088	0.00821053	0.0342007	0.0114103	0.00260955	0.00377361	0.0104107	0.00245073	0.00252918
aPFE1305c_0	aPFE1305c_0::PFE1305c::hypothetical protein	1.83173	1.80449	1.96197	2.15829	1.91201	1.65556	1.72583	1.87083	1.91951	1.74577	2.02893	1.90819	1.68191	1.7486	1.92597
aPF14_0727_1	aPF14_0727_1::PF14_0727::hypothetical protein	0.45727	0.53779	0.645266	0.8273	0.925413	0.335971	0.277823	0.586467	0.796591	0.806327	0.463196	0.486795	0.621173	0.623712	0.636089
aMAL13P1.535_0	aMAL13P1.535_0::MAL13P1.535::null	0.534144	0.581125	0.306272	0.382332	0.296744	0.637077	0.65551	0.638076	0.554336	0.465286	0.394043	0.470443	0.458072	0.313694	0.41605
aPFL0165c_0	aPFL0165c_0::PFL0165c::hypothetical protein	1.38109	1.29003	1.65177	1.43668	1.28334	1.51927	1.3187	1.54827	1.30105	1.28302	1.66359	2.08555	2.48122	2.57572	2.36731
aPFL1595w_0	aPFL1595w_0::PFL1595w::hypothetical protein, conserved	1.43543	1.20669	1.16095	0.742482	0.868818	1.07764	1.17019	0.897294	0.842192	1.06242	1.16125	1.10064	0.832858	0.854081	0.857392
aPFF0995c_0	aPFF0995c_0::PFF0995c::Merozoite surface protein 10, MSP10	0.499683	0.817797	2.5575	3.54147	4.09782	0.536709	0.885962	2.01744	3.29609	3.96191	0.260955	0.211322	0.264895	0.238947	0.259241
aPF07_0075_0	aPF07_0075_0::PF07_0075::hypothetical protein	0.746211	0.612236	0.43454	0.506297	0.39311	0.820911	0.540283	0.417564	0.337732	0.375272	0.662827	0.53711	0.559866	0.53426	0.696789
aPFC0165w_1	aPFC0165w_1::PFC0165w::hypothetical protein	2.1485	1.63115	1.70282	1.29054	1.19157	1.88799	2.13553	1.88373	1.91524	1.65576	2.17637	2.4453	2.03703	2.02798	2.30788
aPF13_0035_1	aPF13_0035_1::PF13_0035::hypothetical protein	0.630899	0.645571	0.562808	0.407125	0.58584	0.568404	0.905166	0.886737	1.14287	1.48841	0.745028	0.968559	0.882598	0.86756	0.959824
aMAL13P1.116_3	aMAL13P1.116_3::MAL13P1.116::hypothetical protein	1.41687	1.06114	0.853373	1.05957	1.02484	1.27204	1.20604	0.984091	0.803716	0.709974	1.12602	1.09309	0.973981	1.04524	1.1356
aPFI0440w_0	aPFI0440w_0::PFI0440w::hypothetical protein	1.46061	1.19558	1.45937	1.55412	1.52961	1.52244	1.37503	1.12953	2.02212	1.14483	1.11297	0	0.854836	0.903095	0.857392
aPFF1475c_1	aPFF1475c_1::PFF1475c::hypothetical protein	2.81519	3.18674	3.41349	3.15131	3.14488	2.96141	3.03685	3.44256	3.69938	3.3635	1.18996	1.09686	1.12899	1.22169	1.32276
aPFE0705c_1	aPFE0705c_1::PFE0705c::helicase, belonging to UvrD family, putative	2.05705	1.97116	1.78397	1.54368	1.42865	1.52349	1.86411	1.99985	1.94089	2.1426	2.87834	3.32958	2.74959	2.85511	3.06663
aPF10_0224_2	aPF10_0224_2::PF10_0224::dynein heavy chain, putative	0.454619	0.567791	0.335067	0.344491	0.304392	0.437396	0.390489	0.412872	0.297831	0.368933	0.418833	0.562267	0.381727	0.482795	0.460311
aPF10_0166_0	aPF10_0166_0::PF10_0166::hypothetical protein	1.30289	1.58448	2.86901	3.12782	3.43091	0.996292	1.24316	2.45612	2.73321	3.14037	0.878115	0.710696	0.621173	0.590627	0.541245
aPF11_0278_0	aPF11_0278_0::PF11_0278::hypothetical protein	0.200138	0.316674	1.65047	3.40967	4.47717	0.173268	0.314952	0.910196	1.70576	2.62437	0.106992	0.122013	0.113361	0.122537	0.116342
aPFI0605c_0	aPFI0605c_0::PFI0605c::hypothetical protein, conserved	1.75353	1.67226	1.21462	1.10394	0.903999	1.88482	1.88971	1.4603	1.58036	1.43389	1.40003	1.42265	1.73396	1.64812	2.02208
aPFI0880c_1	aPFI0880c_1::PFI0880c::acid phosphatase, putative	2.72506	2.68451	3.37946	2.96601	2.86496	2.6191	3.4952	3.7006	4.7767	3.62213	2.08764	1.94089	1.78949	1.45083	1.51245
aPFL0790w_0	aPFL0790w_0::PFL0790w::hypothetical protein	1.35855	1.21447	1.29969	1.17831	1.12579	1.2974	1.28925	1.45444	1.26828	1.21203	1.49919	1.66039	1.88434	2.00838	1.89183
aPF13_0024_1	aPF13_0024_1::PF13_0024::hypothetical protein	1.72172	1.76004	1.45152	1.09611	1.17015	1.41044	2.01902	1.79459	1.39938	1.94609	2.14766	2.87046	2.80048	2.32942	2.73784
aPF14_0170_2	aPF14_0170_2::PF14_0170::hypothetical protein	0.999366	1.06336	1.11776	0.879495	1.08908	1.0713	1.47874	1.37233	1.34523	1.60758	1.2278	1.56856	1.54888	1.31604	1.63891
aPFL1130c_3	aPFL1130c_3::PFL1130c::hypothetical protein	1.49905	1.25892	1.1832	1.06609	0.90094	1.12096	1.27005	1.2785	1.36803	1.22217	1.15342	1.06038	1.00059	0.953336	1.04708
aPFF1275c_0	aPFF1275c_0::PFF1275c::3-oxoacyl-[acyl-carrier-protein] synthase i/ii	0.978159	0.943355	0.900492	0.828605	1.01413	0.792385	0.708001	1.01224	1.25545	1.50109	1.07122	0.899376	0.872187	0.877363	0.851069
aPFI1260c_0	aPFI1260c_0::PFI1260c::Histone deacetylase	1.58653	1.47448	1.37168	1.25791	1.00801	1.38509	1.60165	1.2914	1.46635	1.16005	1.62314	1.86919	2.0752	2.1689	2.32179
aMAL13P1.234_6	aMAL13P1.234_6::MAL13P1.234::hypothetical protein	1.9921	1.59337	2.38081	2.3762	2.02979	1.9387	1.55171	2.05967	2.95551	2.6662	1.70143	1.54341	1.61598	1.60523	1.61868
aPF11_0176_1	aPF11_0176_1::PF11_0176::hypothetical protein	1.90728		1.16095	1.40406	1.10744	2.26516	2.36854	0.753023	0.855017	0.884931	1.56965	1.68806	1.72124	1.32707	1.81848
aMAL13P1.405_1	aMAL13P1.405_1::MAL13P1.405::erythrocyte membrane protein pfemp3, putative	1.21673	1.66115	4.67654	7.57488	8.05492	1.09666	1.73095	2.75991	5.51629	4.1039	0.664131	0.739627	0.728751	0.741347	0.805544
aPF13_0331_0	aPF13_0331_0::PF13_0331::hypothetical protein, conserved	1.25252	1.24558	1.03138	0.771189	0.963654	1.23506	0.985825	0	0.790891	1.04341	1.90236	1.64278	1.34183	1.30624	1.37208
aPFE1295c_0	aPFE1295c_0::PFE1295c::hypothetical protein	1.30421	1.11669	0.954155	0.806421	0.74186	1.49074	1.14842	0.914888	0.96047	0.831683	1.84365	1.88051	2.01737	2.1015	2.22315
aPF14_0479_0	aPF14_0479_0::PF14_0479::hypothetical protein	1.17962	1.0578	1.21854	1.19397	1.0692	1.12307	1.44673	1.45561	1.83971	1.54292	1.04904	1.04655	1.00868	1.07342	1.08881
aPFF0955c_0	aPFF0955c_0::PFF0955c::hypothetical protein	1.68328	2.28339	1.63476	1.19919	1.11661	1.90067	2.16241	2.18987	2.20594	2.43166	2.35512	2.93838	2.54716	2.22527	2.58988
aMAL7P1.127_2	aMAL7P1.127_2::MAL7P1.127::hypothetical protein	1.92318	2.07783	1.45806	1.23442	1.19309	1.86897	1.85386	1.60457	1.4407	1.35909	1.96499	2.02014	2.05785	2.34413	2.24971
aPFD0960c_0	aPFD0960c_0::PFD0960c::unknown	1.06034	0.80113	1.05755	0.802507	0.867288	0.73005	1.13434	1.04391	1.01035	1.1778	1.01903	1.02642	0.880284	0.938631	0.993968
aPFC0365w_0	aPFC0365w_0::PFC0365w::conserved protein, putative	0.91719	0.753351	0.609926	0.447577	0.463472	0.885358	0.887242	0.650978	0.624163	0.522338	1.1469	1.32328	1.49914	1.70939	1.80836
aPFL1475w_0	aPFL1475w_0::PFL1475w::sun-family protein, putative	0.621622	0.770018	0.829814	0.764665	0.786219	0.815628	0.837311	0.733083	0.795166	0.824076	0.960316	1.12076	1.17988	1.14572	1.24183
aPFI0465c_1	aPFI0465c_1::PFI0465c::hypothetical protein	2.07693	1.61448	1.82847	1.3075	1.42407	1.73796	2.1701	1.49549	1.72286	1.59364	1.83452	1.66416	1.14287	1.23394	1.08755
aPF14_0271_0	aPF14_0271_0::PF14_0271::hypothetical protein	0.603066	0.525568	0.659663		0.634788	0.492335	0.460905	0.653324	0.329182	0.630102	0.274003	0.361008	0.997116	1.14449	0.534922
aPF08_0040_1	aPF08_0040_1::PF08_0040::hypothetical protein	0.620296	0.515568	0.363862	0.318393	0.330396	0.500787	0.463466	0.368301	0.312081	0.303007	0.786781	0.693086	0.654719	0.676403	0.734727
aPFL0290w_1	aPFL0290w_1::PFL0290w::hypothetical protein	1.11203	0.862242	1.01174	1.08697	1.35982	1.15266	1.25725	1.15768	1.2298	1.0675	1.14168	1.21259	0.986705	0.949659	1.06731
aPF10_0138_0	aPF10_0138_0::PF10_0138::hypothetical protein	0.116637	0.228894	1.65308	5.53142	5.24044	0.0982557	0.206127	0.618136	1.435	1.53532	0.0326194	0.0314467	0.0231349	0.0220566	0.0252918
aPFB0150c_4	aPFB0150c_4::PFB0150c::protein kinase, putative	0.42546	0.626681	2.37034	5.08907	7.54097	0.402531	0	0.909023	1.57608	1.82945	0.335328	0.335851	0.286873	0.35168	0.362937
aPF11_0140_0	aPF11_0140_0::PF11_0140::hypothetical protein	0.561978	0.640015	0.578514	0.615908	0.760216	0.595873	0.514677	0.543068	0.547211	0.763222	0.473634	0.384908	0.328516	0.39947	0.327529
aPFC0220w_0	aPFC0220w_0::PFC0220w::hypothetical protein	1.87414	2.05338		1.16788	0.975891	2.28101	1.68871	1.55414	1.30533	1.24753	2.47647	2.35599	3.48412	3.70551	3.87344
aMAL7P1.207_0	aMAL7P1.207_0::MAL7P1.207::	2.50769	2.29339	1.85988	2.09043	2.07262	2.06443	2.34293	2.86782	2.80731	3.11121	2.13592	2.85159	2.96706	3.90524	3.50165
aPFL2430c_0	aPFL2430c_0::PFL2430c::eukaryotic translation initiation factor 2b, subunit 2, putative	1.15444	1.20003	0.82327	0.712469	0.657732	0.981501	0.953818	1.01107	0.900618	0.934376	1.5853	1.51322	1.81841	1.91157	1.76157
aPF11_0504_0	aPF11_0504_0::PF11_0504::hypothetical protein	0.230623	0.190004	0.163607	0.110916	0.261563	0.203907	0	0.180632	0.155328	0.125513	0.131782	0.142139	0.104107	0.0820996	0.127724
aPFL0820c_0	aPFL0820c_0::PFL0820c::hypothetical protein	0.960929	0.683349	0.64003	0.358844	0.31204	0.784989	0.631184	0.496151	0.416108	0.39936	0.593674	0.397487	0.561022	0.975392	0.806808
aPFA0405w_1	aPFA0405w_1::PFA0405w::hypothetical protein	1.08154	1.92893	1.70413	0.739872	0.54607	1.41995	1.30718	1.17293	1.27683	1.04087	1.38306	1.69687	1.87277	2.11743	1.79698
aPF14_0045_1	aPF14_0045_1::PF14_0045::hypothetical protein	0.133867	0.0966689	0.0876933	0.155282	0.261563	0.129951	0.122908	0.110256	0.112577	0.116639	0.116125	0.11195	0.109891	0.107832	0.126459
aPF08_0141_3	aPF08_0141_3::PF08_0141::erythrocyte membrane protein 1 (PfEMP1)	0.015905		0.00916198			0.0285259	0.0153635	0.0187669	0	0	0.011743	0.0150944	0	0	0
aPFB0010w_0	aPFB0010w_0::PFB0010w::erythrocyte membrane protein 1 (PfEMP1)	0.115311		0.175387		0.143783	0.155307	0	0.188842	0.159603	0.167351	#N/A	#N/A	#N/A	#N/A	#N/A
aPF11_0129_1	aPF11_0129_1::PF11_0129::hypothetical protein	1.71112	1.31781	0.876933	0.8808	1.03707	1.02482	1.2278	0.953595	0.763816	0.876057	1.40524	1.29686	1.18567	1.18983	1.22665
aPF11_0378_0	aPF11_0378_0::PF11_0378::hypothetical protein	0.469198	0.356675	0.30889	0.375808	0.504771	0.396192	0.343118	0.314346	0.303531	0.367665	0.550616	0.57233	0.566806	0.621261	0.652528
aMAL8P1.30_1	aMAL8P1.30_1::MAL8P1.30::hypothetical protein	2.60445	2.46895	1.55361	1.0935	1.21757	1.56892	2.30709	1.77934	1.90669	1.48207	1.1482	1.01762	0.652405	0.794038	0.676556
aPF13_0286_1	aPF13_0286_1::PF13_0286::methyltransferase, putative	0.471849	0.362231	0.225123	0.267502	0.296744	0.406757	0.402012	0.333113	0.220879	0.311881	0.648474	0.581135	0.528633	0.567345	0.499513
aPF10_0326_1	aPF10_0326_1::PF10_0326::hypothetical protein	0.699821	0.618903	0.541866	0.420174	0.434409	1.05757	0.967901	0.798767	0.74244	0.753079	0.784171	0.652834	0.704459	0.65067	0.704377
aPFF0825c_1	aPFF0825c_1::PFF0825c::mitochondrial import receptor subunit tom40	0.499683	0.418899	0.301037	0.358844	0.35028	0.555726	0.457064	0.376512	0.374783	0.341041	0.733285	0.761011	0.840955	0.840602	0.854863
aPF14_0326_12	aPF14_0326_12::PF14_0326::hypothetical protein	0.987437	0.722239	0.518307		0.659261	0.697299	0.706721	0.548933	0.443184	0.502053	0.643255	0.656608	0.465012	0.464414	0.514688
aPFL0410w_4	aPFL0410w_4::PFL0410w::hypothetical protein	0.231948	0.238894	0.395274	0.737262	0.699031	0.258846	0.154915	0.275639	0.282156	0.380343	0.20224	0.25409	0.176982	0	0.316148
aPFL1620w_0	aPFL1620w_0::PFL1620w::asparagine/aspartate rich protein, putative	1.4182	0.893354	0.927978	0.685067	0.790808	1.2171	1.32126	0.973534	0.843617	0.939447	1.64402	1.83146	1.77098	2.06474	2.20671
aPFL0425c_2	aPFL0425c_2::PFL0425c::hypothetical protein	0.592462	0.492234	0.494747	0.429308	0.481827	0.650812	0.344399	0.44806	0.436059	0.438662	0.652389	0.659123	0.807409	0.596754	0.687937
aPFL1540c_1	aPFL1540c_1::PFL1540c::phenylalanyl-tRNA synthetase alpha chain, putative	1.89402	1.7256	1.17928	0.930386		2.26305	1.62341	1.41338	1.07875	0.90902	1.78493	1.49309	1.33836	1.41285	1.53901
aPF07_0009_0	aPF07_0009_0::PF07_0009::chitinase precursor fragment, putative	0.229297		0.26308		0.327336	0.282089	0.134431	0.201744	0.205204	0.315685	0.225726	0.202517	0.151534	0.174002	0.254183
aPF14_0228_0	aPF14_0228_0::PF14_0228::hypothetical protein	0.983461	0.743351	0.573278	0.529785	0.527715	0.937127	0.884682	0.669745	0.679739	0.597138	1.27607	1.40881	1.39619	1.52313	1.65788
aPFI1105w_1	aPFI1105w_1::PFI1105w::Phosphoglycerate kinase	1.23794	1.01113	0.759136	0.636786	0.524656	1.01214	1.03192	0.613444	0.511585	0.42852	1.12733	1.08177	1.00868	0.90187	0.90924
aPF07_0081_0	aPF07_0081_0::PF07_0081::hypothetical protein	1.26445	1.69448	1.50257	0.882105	0.949887	1.51398	1.77961	1.49784	1.11152	0.959732	1.69621	1.41384	1.47485	1.79884	2.03346
aPFF1150w_0	aPFF1150w_0::PFF1150w::ribonuclease H1 large subunit, putative	0.941047	0.873354	0.787931	0.862532	0.786219	0.982557	1.01015	0.781173	0.665489	0.594603	0.647169	0.591198	0.57953	0.658022	0.599416
aClp_0	aClp_0::Clp::	2.15778	2.39228	2.97241	2.40361	2.3143	1.24669	1.06136	0.456271	0.474535	0.456412	0.756771	0.605035	0.460385	0.305116	0.304766
aPFI0180w_1	aPFI0180w_1::PFI0180w::alpha tubulin	2.38575	2.26005	2.37426	1.99779	1.78658	2.90752	2.59259	2.51946	1.98364	2.0361	2.08112	1.88429	2.20129	1.87726	1.8463
aPFF0990c_1	aPFF0990c_1::PFF0990c::hypothetical protein	0.78995	0.85002	3.51297	5.53403	5.22056	0.71209	1.18171	2.41272	4.21524	3.84273	0.326194	0.284278	0.285717	0.272031	0.271887
aPFL1130c_4	aPFL1130c_4::PFL1130c::hypothetical protein	1.73762	1.22558	1.03007	0.976057	0.930002	1.25936	0.929492	1.15886	0.978995	1.05482	1.09993	0.948433	0.827074	0.879814	0.900388
aPF14_0337_0	aPF14_0337_0::PF14_0337::hypothetical protein	0.61632	1.11669	2.52216	3.34704	4.04888	0.604325	1.14458	2.74584	5.55191	5.97646	0.422748	0.445286	0.511282	0.458287	0.418579
aPF14_0687_1	aPF14_0687_1::PF14_0687::hypothetical protein	0.705123	0.738906	0.359935	0.367979	0.501712	0.640247	0.503155	0.460963	0.361957	0.458947	1.13255	1.17233	0.898792	0.882264	0.896594
aPFF0990c_0	aPFF0990c_0::PFF0990c::hypothetical protein	0.56993	1.26336	4.13598	5.48967	4.70049	0.540935	0.880841	2.3834	3.8946	4.51847	0.431881	0.315725	0.340084	0.318595	0.295914
aPFC0780w_2	aPFC0780w_2::PFC0780w::hypothetical protein	1.24987	0.963356	1.09551	0.893849	0.930002	1.09772	1.16379	1.17645	0.98327	0.934376	1.06078	1.00126	0.866404	0.850405	0.880155
atRNA_RNAPhe_0	atRNA_RNAPhe_0::tRNA_RNA-Phe::			0.626942	0.81686	1.07379	0	0	0	0	0.276383	0	0.18868	0	0	0
aPFL0335c_1	aPFL0335c_1::PFL0335c::eukaryotic translation initiation factor 5, putative	1.53086	1.15447	1.01698	0.751616	0.960594	1.42101	1.27901	1.19287	0.940519	1.02439	1.41699	1.60504	1.59168	1.52803	1.70214
aMAL8P1.66_0	aMAL8P1.66_0::MAL8P1.66::hypothetical protein	0.470524	0.42001	0.575896	0.959093	2.38925	0.503957	0	0	0.51301	0.822809	0.658912	0.774847	0.66513	0	0
aPF14_0584_0	aPF14_0584_0::PF14_0584::ribosomal protein S4, putative	0.611018	0.515568	0.435849	0.391467	0.403817	0.5515	0.449383	0.534857	0.336307	0	0.683703	0.676734	0.601508	0.720516	0.658851
aPF10_0328_1	aPF10_0328_1::PF10_0328::hypothetical protein	1.06166	0.958911	0.820652	0.606773	0.550659	1.14526	1.25597	0.894948	0.782341	0.740401	1.15734	1.37485	1.49105	1.46554	1.65914
aPFL2520w_3	aPFL2520w_3::PFL2520w::reticulocyte-binding protein, putative	0.0318101	0.0577791	0.427996	2.45972	4.01675	0.0348649	0.0396891	0.161865	0.394733	0.54389	0.0143525	0.018868	0	0.00980294	0.0139105
aPF07_0046_1	aPF07_0046_1::PF07_0046::50S ribosomal protein L1, putative	1.15842	0.940022	0.787931		0.454294	1.12519	1.14586	0.733083	0.634138	0.513463	0.601502	0.445286	0.431467	0.412949	0.491926
aMAL8P1.100_0	aMAL8P1.100_0::MAL8P1.100::hypothetical protein	0.763441	0.736684	0.51438	0.455406	0.524656	0.847323	0.560768	0.684993	0.454584	0.660529	1.04774	0.969817	0.952003	1.01215	1.1179
aPFE1640w_0	aPFE1640w_0::PFE1640w::erythrocyte membrane protein 1 (PfEMP1), truncated, pseudogene		0.0966689				#N/A	#N/A	#N/A	#N/A	#N/A	0.0926392	0.140881	0.13881	0	0
aPF14_0692_1	aPF14_0692_1::PF14_0692::hypothetical protein	1.26975	1.22114	1.56932	1.83467	2.1904	0.868454	0.885962	0.777655	0.798016	1.00537	1.45744	1.30693	1.06999	1.18616	1.0572
aPFL0350c_2	aPFL0350c_2::PFL0350c::hypothetical protein	2.60842	2.12783	1.99208	1.77073	1.84318	2.24086	2.3647	2.22857	1.80979	2.37714	2.72568	2.72329	2.34126	2.34903	2.1106
aMAL7P1.162_0	aMAL7P1.162_0::MAL7P1.162::dynein heavy chain, putative	0.722353	0.945578	0.781386	0.829909	1.19462	0.550443	0.528761	0.761234	1.52051	2.02342	0.795914	0	0.603822	0.792812	0.87889
aPFI0870w_1	aPFI0870w_1::PFI0870w::hypothetical protein	1.78136	1.50892	1.1832	1.02956	0.951417	1.44742	1.47106	1.16824	1.0189	0.896342	1.84626	1.69058	1.5512	1.4349	1.53648
aPFB0550w_0	aPFB0550w_0::PFB0550w::peptide chain release factor subunit 1, putative	0.837665	0.724461	0.537939	0.47498	0.466531	0.825137	0.736168	0.491459	0.347707	0.367665	0.919868	0.945917	0.854836	0.887166	0.881419
aPF14_0166_0	aPF14_0166_0::PF14_0166::lysine -- tRNA ligase, putative	1.24854	1.26225	1.0497	0.871666	0.809163	1.13364	1.03448	0.931309	0.849317	0.68335	1.29825	1.26416	1.23309	1.14572	1.22033
aPFD1140w_0	aPFD1140w_0::PFD1140w::hypothetical protein	0.11001	0.0933355	0.133503	0.251844	0.35028	0.0940297	0.0857796	0.109083	0.125403	0.159744	0.150049	0.157234	0.155004	0.147044	0.171984
aPF11_0335_0	aPF11_0335_0::PF11_0335::hypothetical protein	0.77537	1.28447	2.81535	3.0156	3.0118	0.98784	1.71303	2.44439	3.27187	3.20376	1.05817	1.00881	0.941592	0.906772	0.902917
aPF11_0465_1	aPF11_0465_1::PF11_0465::dynamin-like protein	2.02922	2.2245	2.39128	2.15959	1.91354	1.57843	1.99726	2.32475	3.47707	2.7727	2.64609	2.75348	2.4095	2.42868	2.23327
aMAL13P1.230_1	aMAL13P1.230_1::MAL13P1.230::hypothetical protein	0.715726	0.536679	0.683222	0.718994	1.07226	0.541991	0.348239	0.736602	0.862143	1.01932	0.806352	1.01636	0.876814	1.11018	1.01167
aPFD1130w_1	aPFD1130w_1::PFD1130w::hypothetical protein	0.124589	0.177782	0.905728	3.50232	4.89475	0.110934	0.190764	0.397624	0.800866	0.921698	0.0887248	0.0742143	0.0717183	0.060043	0.0733462
aPF07_0051_2	aPF07_0051_2::PF07_0051::erythrocyte membrane protein 1 (PfEMP1)	0.212067	0.263339			0.0581251	0.416266	0.139552	0.304963	0.125403	0	0.0508863	0.145913	0.155004	0.0441132	0.260506
aPF14_0303_1	aPF14_0303_1::PF14_0303::hypothetical protein	2.65084	2.45117	3.31009		2.66917	2.43209	2.59259	3.53639	3.9231	3.42562	1.70534	1.42013	1.6368	1.62606	1.3784
aPF11_0345_0	aPF11_0345_0::PF11_0345::hypothetical protein	1.08684	1.02002	0.897875	1.21616	2.02826	0.681451	0.681115	0.714316	0.72249	0.583193	1.01381	1.12705	1.27126	1.2511	1.19251
aMAL8P1.220_0	aMAL8P1.220_0::MAL8P1.220::	0.519564	0.865576	0.249991	0.3471	0.2738	0.728994	0.510836	0.767098	0.387608	0.294132	0.396652	0.555978	0.82129	0.512203	0.46284
aPF14_0626_2	aPF14_0626_2::PF14_0626::dynein beta chain, putative	0.202789				0.191201	0.170099	0	0	0.165303	0.138191	#N/A	#N/A	#N/A	#N/A	#N/A
aPFL1210w_2	aPFL1210w_2::PFL1210w::hypothetical protein	0.946349	0.978912	0.787931	0.639396	0.593488	0.816685	0.426337	0.646286	0.494485	0.462751	0.589759	0.70818	0.792372	0.802615	0.78784
aMAL7P1.228_1	aMAL7P1.228_1::MAL7P1.228::	0.00397626		0.00523542		0.00764805	0.00633908	0	0.00586466	0.00712515	0.00887467	0.00391433	0.00377361	0.00347024	0.00245073	0
aPF14_0041_0	aPF14_0041_0::PF14_0041::ribosomal protein L16, putative	1.41157	1.15114	1.14525	1.18092	1.04472	1.18118	0	1.15768	1.1956	1.15117	1.09732	1.08428	1.09197	1.12489	1.15457
aPFB0315w_1	aPFB0315w_1::PFB0315w::41 kDa antigen	0.678615	0.666682	1.15965	2.80812	3.48445	0.73639	0.663191	0.858587	0.936244	1.50235	0.953792	0.852835	0.695205	0.743798	0.691731
aPF14_0693_0	aPF14_0693_0::PF14_0693::hypothetical protein	0.455944	0.734462	1.07588	1.14178	1.88601	0.409927	0.402012	0.538376	0.654088	1.37431	0.495815	0.544657	0.371316	0.371286	0.484338
aPF14_0063_0	aPF14_0063_0::PF14_0063::ATP-dependent Clp protease, putative	2.22273	1.83115	1.33372	1.2018	0.962124	2.69939	2.31477	1.8415	1.59176	1.46812	1.7471	1.37108	1.46097	1.46186	1.41255
aPFF1130c_0	aPFF1130c_0::PFF1130c::Fe-superoxide dismutase	3.05774	3.07785	2.10202	1.75377	1.74681	2.60959	2.71934	1.97053	1.64163	1.90298	2.04589	1.78366	1.35455	1.3332	1.20136
aPFF0370w_1	aPFF0370w_1::PFF0370w::para-hydroxybenzoate--polyprenyltransf erase (4- hydroxybenzoate octaprenyltransferase), putative	1.80522	1.67448	1.35205	1.05435	1.2038	2.04435	1.5005	1.25035	1.4122	1.36416	2.20507	2.22265	2.56451	2.72767	2.71128
aPFL2285c_0	aPFL2285c_0::PFL2285c::hypothetical protein	0.418832	0.648904	2.34678	2.31226	2.44584	0.359214	0.609419	2.10659	3.44144	3.19742	0.249212	0.329562	0.285717	0.270806	0.255447
aMAL8P1.23_3	aMAL8P1.23_3::MAL8P1.23::ubiquitin-protein ligase 1, putative	1.23131	1.06225	0.999965	0.721604	0.746449	1.29106	1.4096	1.21281	1.4692	1.17272	0.965535	1.1673	1.09197	1.07832	1.40117
aPFC0835c_0	aPFC0835c_0::PFC0835c::hypothetical protein	1.86089	1.52337	1.42665	1.36622	1.07684	1.40622	1.76808	1.75353	1.62311	1.62026	1.55529	1.44655	1.32216	1.39202	1.41634
aPFF0670w_6	aPFF0670w_6::PFF0670w::hypothetical protein	3.21679	2.74562	3.03262	2.63327	2.21793	3.62384	4.21216	4.57209	4.29361	3.9226	2.08634	1.68051	1.43552	1.39569	1.31644
aPFL1575w_0	aPFL1575w_0::PFL1575w::hypothetical protein	2.73964	3.44008	2.73027	4.29308	5.15325	2.66136	3.54257	3.12469	3.44144	3.4383	2.08764	2.25913	2.07405	2.05372	2.13463
aMAL8P1.130_1	aMAL8P1.130_1::MAL8P1.130::hypothetical protein		1.09669	0.721179	0.718994	0.660791	1.21605	1.00375	0.7237	0.706814	0.557836	1.05165	0.983654	1.011	1.06729	1.02685
aMAL13P1.298_0	aMAL13P1.298_0::MAL13P1.298::hypothetical protein	1.48182	1.42003	1.53267	1.3884	1.31393	1.34811	2.01518	1.75588	1.99504	2.27065	1.64271	2.11196	1.84501	1.81109	2.00311
aPFD0692c_0	aPFD0692c_0::PFD0692c::	2.44407	3.29897	2.51955	1.95211	1.84624	2.71524	2.88322	2.55465	2.42397	2.4063	1.8854	1.4151	1.23078	1.28541	1.24562
aPFL2460w_0	aPFL2460w_0::PFL2460w::coronin	0.0781997	0.128892	0.926669	3.39271	3.89897	0.084521	0.142112	0.410527	1.0702	1.27668	0.0378385	0.0402518	0.0416429	0.0306342	0.0366731
aPFL0745c_1	aPFL0745c_1::PFL0745c::hypothetical protein	2.71578	2.14449	2.4541	2.2157	1.93649	2.56944	3.0599	3.62436	4.07701	0	3.80995	4.0277	3.87857	3.82192	3.73181
aPF14_0051_2	aPF14_0051_2::PF14_0051::hypothetical protein, conserved	0.630899	0.907799	0.658354	0.46715	0.227912	0.748011	0.720804	0.511399	0.477385	0.433591	0.84941	0.945917	0.644308	0.65067	0.758754
aPF11_0144_0	aPF11_0144_0::PF11_0144::hypothetical protein	0.693194	0.641126	0.545793	0.555883	0.66538	0.603269	0.577412	0.431639	0.428934	0.425984	0.955097	1.06416	0.912673	1.0722	1.07617
aPF13_0101_0	aPF13_0101_0::PF13_0101::hypothetical protein	1.08154	1.03114	1.02876	0.797287	0.786219	1.26253	0.838591	1.15651	1.14002	1.21583	2.0746	2.31699	2.75653	2.73379	2.96041
aPF13_0170_1	aPF13_0170_1::PF13_0170::glutaminyl-tRNA synthetase, putative	1.07889	0.978912	0.756518	0.664189	0.621021	0.992066	0.994787	0.814016	0.939094	0.849433	1.33609	1.17862	1.43552	1.41407	1.3607
aPFE0570w_2	aPFE0570w_2::PFE0570w::hypothetical protein	1.16239	0.928911	0.837667	0.773799	0.700561	1.19492	1.02423	1.01693	0.990395	0.799988	0.942049	1.01887	1.03066	0.998674	1.31138
aPF14_0409_0	aPF14_0409_0::PF14_0409::hypothetical protein	2.24924	1.8556	1.69366	1.30358	1.57856	1.97462	2.56827	2.47254	2.61208	2.87413	3.23193	3.4931	3.19609	3.00583	3.02616
aPFD0965w_2	aPFD0965w_2::PFD0965w::hypothetical protein	2.1273	1.72337	2.37557	2.12436	1.66421	1.76438	2.2085	2.17579	2.64058	2.01455	0.892467	0.866672	0.984392	0.896969	1.03823
aPFL0355c_0	aPFL0355c_0::PFL0355c::hypothetical protein	0.783323	0.726684	0.717253	0.801202	0.850463	0.805063	0.779698	0.821053	0.615613	0.716313	1.33218	1.20252	1.43437	1.61136	1.45048
aPFC0940c_0	aPFC0940c_0::PFC0940c::hypothetical protein	1.25782	1.87227	2.1426	2.41535	3.90815	1.15054	1.37247	2.29895	2.98116	3.98853	1.8032	1.62014	1.35339	1.66282	1.57821
aMAL8P1.152_1	aMAL8P1.152_1::MAL8P1.152::hypothetical protein	0.755489	0.462233	0.511762	0.424089	0.46806	0.711033	0.686237	0.652151	0.689714	0	0.765904	0.812583	0.743788	0.722966	0.800485
aPFA0220w_1	aPFA0220w_1::PFA0220w::ubiquitin carboxyl-terminal hydrolase, putative	0.368466	0.348897	0.38873	1.1483	2.16593	0.414153	0.371285	0.392933	0.414683	0.423449	0.35229	0.304404	0.3343	0.328398	0.341439
aPF07_0005_0	aPF07_0005_0::PF07_0005::lysophospholipases-like protein, putative	0.145796	0.118892	0.155754	0.759445	1.70245	0.164816	0.125469	0.163038	0.172429	0.224402	0.126563	0.148429	0.175826	0.18503	0.226362
aPF14_0549_1	aPF14_0549_1::PF14_0549::hypothetical protein	1.4341	1.41337	1.62298	1.59196	1.47301	1.22027	1.3315	1.66674	1.60458	1.98412	1.44961	1.92706	2.07289	1.81967	1.95632
aPFL0135w_1	aPFL0135w_1::PFL0135w::hypothetical protein	1.15974	1.31225	1.87559	1.90253	1.66574	1.18963	1.36095	1.36529	1.92379	1.88777	1.18474	1.09812	1.04801	0.894518	1.02811
aPFD0540c_0	aPFD0540c_0::PFD0540c::hypothetical protein	0.785973	0.711128	0.471188	0.310564	0.420642	0.748011	0	0.608752	0.50731	0.571782	0.888553	1.27045	1.0457	1.28541	1.37208
aMAL13P1.326_0	aMAL13P1.326_0::MAL13P1.326::ferrochelatase, putative	0.273036	0.36112	0.366479	0.309259		0.290541	0	0.229895	0.287856	0.248491	0.444929	0.393713	0.364375	0.327173	0.467898
aPFB0145c_2	aPFB0145c_2::PFB0145c::hypothetical protein	1.60641	1.38892	1.88999	2.94122	3.6007	1.21076	1.55171	1.88021	1.65873	2.61422	1.34653	1.47674	1.33604	1.20699	1.35564
aPF08_0142_2	aPF08_0142_2::PF08_0142::erythrocyte membrane protein 1 (PfEMP1)	0.723679	0.673349	0.734268	0.850788	1.00342	0.723711	0.836031	0.97588	1.2754	1.20569	0.700665	0.638997	0.729907	0.713164	0.709435
aPFC0425w_5	aPFC0425w_5::PFC0425w::hypothetical protein	0.74356	0.641126	0.464644	0.481504	0.729623	0.697299	0.722085	0.619309	0.410408	0.447537	0.990326	0.953465	0.71834	0.749925	0.782781
aPFD0865c_1	aPFD0865c_1::PFD0865c::cdc2-related protein kinase 1	0.905261	0.931133	0.827196	0.64331	0.475708	1.29106	0.728486	0.971189	0.829367	0.638976	1.066	1.27045	1.39504	1.20331	1.41381
aPFE1060c_2	aPFE1060c_2::PFE1060c::hypothetical protein	1.22204	1.27336	0.557572	0.777714	0.845874	1.12836	1.07545	0.561835	0.608487	0.711241	0.69936	0.601261	0.47311	0.487696	0.519747
aMAL13P1.321_0	aMAL13P1.321_0::MAL13P1.321::hypothetical protein	1.80257	2.39339	2.49468	1.75116	1.84471	1.55836	1.7668	2.61681	2.90563	2.01835	2.49473	2.32077	2.41182	2.47157	2.23832
aPF11_0326_4	aPF11_0326_4::PF11_0326::hypothetical protein	0.253155	0.261117	0.192402	0.227051	0.186612	0.32118	0.209968	0.336632	0.141078	0	0.151354	0.205033	0.136496	0.16665	0.187159
aMAL13P1.1_0	aMAL13P1.1_0::MAL13P1.1::	0.371117	0.416676	0.861227	0.465845	0.478768	0.623343	0.323914	0.545414	0.605637	0.6656	0.23225	0.359751	0.340084	0.294088	0.316148
aPFE0295w_0	aPFE0295w_0::PFE0295w::hypothetical protein	1.10275	0.954467	0.746047	0.675933	0.607255	1.09138	1.0396	0.704933	0.51016	0.585728	1.25389	1.14215	1.10469	1.1641	1.20389
aPF14_0487_1	aPF14_0487_1::PF14_0487::hypothetical protein	0.80718	0.562235	0.486894		0.455823	0.834645	0.851394	0.697895	0.612762	0.649119	0.801133	1.00881	0.983235	1.02931	1.12675
aMAL13P1.224_0	aMAL13P1.224_0::MAL13P1.224::hypothetical protein	0.599089	0.552235	0.566734	0.660274	0.694442	0.690959	0.695199	0.686166	0.617038	0.616156	0.504949	0.706922	0.47658	0.395794	0.494455
aPF10_0341_0	aPF10_0341_0::PF10_0341::hypothetical protein, conserved	0.681265	0.392231	0.38873	0.444967	0.376284	0.594817	0.647828	0.489113	0.483085	0.845629	0.446234	0.470443	0.565649	0.65067	0.729668
achr12tRNAPro1_0	achr12tRNAPro1_0::chr12-tRNA-Pro-1::(tRNA) tRNA-Pro	0.719702	0.768907	0.933214	0.837739	0.952946	0.555726	0.460905	0.471519	0.366232	0.551497	1.29956	1.83397	2.974	3.6761	3.17539
aPF11_0374_0	aPF11_0374_0::PF11_0374::hypothetical protein	1.33735	1.05558	0.873006	0.712469	0.613373	1.14949	1.26621	0.917234	0.645538	0.926769	1.55921	1.40252	1.23772	1.35158	1.30885
aMAL7P1.16_1	aMAL7P1.16_1::MAL7P1.16::hypothetical protein	0.762116	0.77224	0.469879	0.476284	0.515478	0.975161	0.802743	0.577083	0.503035	0.564175	0.992935	1.16982	1.09313	1.03544	1.27471
aPFL1035w_1	aPFL1035w_1::PFL1035w::hypothetical protein	0.878753	0.751129	0.43454	0.369284	0.356399	0.476487	0.408413	0.353053	0.297831	0.308078	0.863762	0.798747	0.652405	0.699685	0.643676
aMAL7P1.89_7	aMAL7P1.89_7::MAL7P1.89::hypothetical protein	0.824411	0.864465	1.14001	0.792068	1.04778	0.772311	0.359762	0.509053	0.666914	0.808863	1.20431	1.11321	1.19029	0.992547	1.27977
aPF11_0357_0	aPF11_0357_0::PF11_0357::hypothetical protein	0.781997	1.06891	1.45283	1.26183	1.46078	0.660321	0.672153	1.57408	1.76561	2.47223	0.799828	1.21636	1.09544	1.0918	1.03317
aPFL1455w_0	aPFL1455w_0::PFL1455w::hypothetical protein	0.22002	0.291118	0.289257	0.146148	0.249326	0.277863	0.181801	0.182978	0.183829	0.195243	0.240079	0.352203	0.286873	0.242623	0.254183
aPFB0500c_0	aPFB0500c_0::PFB0500c::rab5 protein, putative		2.81673	2.22636		1.52349	0	0	0	0	2.12231	2.96054	2.30567	0	0	0
aMAL13P1.26_5	aMAL13P1.26_5::MAL13P1.26::hypothetical protein	0.893332	0.582236	0.516998	0.493248	0.465001	0.825137	0.759213	0.582948	0.49876	0.365129	0.785476	0.735853	0.747259	0.729093	0.748637
aMALP1.29a_0	aMALP1.29a_0::MALP1.29::	2.05307	1.68671	1.60204	1.69636	1.57703	1.62069	2.00238	1.69723	1.37088	1.46178	0.82201	0.691828	0.626957	0.731544	0.757489
aPFL0380c_0	aPFL0380c_0::PFL0380c::tRNA delta(2)-isopentenylpyrophosphate transferase, putative	0.653432	0.427788	0.371715	0.334052	0.328866	0.514522	0.450663	0.401143	0.259355	0.314417	0.619769	0.628934	0.500871	0.546514	0.550097
aPFA0480w_0	aPFA0480w_0::PFA0480w::phenylalanyl-tRNA synthetase beta chain, putative	1.01395	0.854464	0.680605	0.429308	0.442057	1.24035	1.17403	0.923098	0.769516	0.679546	1.14951	1.29435	1.42974	1.38834	1.51624
aPF11_0142_0	aPF11_0142_0::PF11_0142::hypothetical protein, conserved	1.47122	1.59448	1.45283	1.64286	1.95025	1.13469	1.56836	1.15886	1.11722	1.19174	1.49006	1.71196	1.48873	1.43	1.47451
aMAL13P1.298_2	aMAL13P1.298_2::MAL13P1.298::hypothetical protein	1.79727	2.00782	1.98684	1.87904	1.89824	1.80241	1.80265	1.93299	1.96369	2.10076	2.02632	2.25787	2.04513	2.00102	1.74387
aPFL0775w_0	aPFL0775w_0::PFL0775w::hypothetical protein	1.53086	1.53781	1.01044	0.917337	0.777041	1.30162	1.29181	0.977053	0.933394	0.628834	1.90758	1.80882	1.87162	1.41162	1.82354
aPF07_0067_1	aPF07_0067_1::PF07_0067::hypothetical protein	0.398951	0.295562	0.247374		0.224853	0.331745	0.327755	0.269775	0.192379	0.248491	0.491901	0.571073	0.52632	0.590627	0.610797
aPFB0905c_0	aPFB0905c_0::PFB0905c::hypothetical protein	1.10142	1.30003	2.15045	2.69199	2.74565	1.17907	1.72455	2.98629	5.54051	4.6592	0.516692	0.544657	0.507812	0.555091	0.494455
aPFD0660w_0	aPFD0660w_0::PFD0660w::hypothetical protein	1.55074	1.99227	1.89522	1.60632	1.4256	2.23453	2.55034	2.38457	2.38407	2.13372	2.82354	2.57612	2.27301	2.12479	2.06381
aPF10_0350_1	aPF10_0350_1::PF10_0350::hypothetical protein	0.872126	0.727795	0.700237	0.767275	0.607255	0.834645	0.801463	0.673264	0.709664	0.692224	0.818095	0.811325	0.766923	0.746249	0.78784
aPF10_0058_1	aPF10_0058_1::PF10_0058::hypothetical protein	0.816458	0.520012	0.523542	0.497163	0.486416	0.715259	0.714403	0.602888	0.578562	0.590799	0.780257	0.788684	0.71834	0.829573	0.824513
aMAL8P1.126_1	aMAL8P1.126_1::MAL8P1.126::serine protease, putative	1.9033	1.67559	2.64127	2.18047	1.94107	1.07659	1.75784	2.24499	3.40724	0	3.67425	4.30443	4.31814	4.7532	4.2819
aPF14_0304_1	aPF14_0304_1::PF14_0304::hypothetical protein	1.3294	1.3667	2.21197	3.33269	4.10088	1.6302	1.20347	1.50487	0	1.90298	1.32565	1.91448	1.99886	1.84418	1.97908
aPFE0570w_14	aPFE0570w_14::PFE0570w::hypothetical protein	1.04708	0.974467	0.888713	0.739872	0.795397	0.862115	1.18939	1.22923	1.05595	1.09919	0.768514	0.607551	0.640838	0.508527	0.709435
aPF13_0214_1	aPF13_0214_1::PF13_0214::elongation factor 1-gamma, putative	1.06034	1.00113	0.664898	0.481504	0.449705	1.13258	1.12666	0.600542	0.545786	0.458947	1.21344	1.28303	1.03529	1.05014	1.0572
aPF11_0240_2	aPF11_0240_2::PF11_0240::dynein heavy chain, putative	0.438714	0.544457	0.404436		0.322747	0.485996	0	0.491459	0.339157	0.360058	0.378385	0.500632	0.275306	0.248749	0.392023
aPFA0675w_0	aPFA0675w_0::PFA0675w::P. falciparum RESA-like protein with DnaJ domain	1.00732			0.746397	1.54032	0.680394	0.78738	0.912542	0.73959	1.40093	1.13255	1.30315	1.23309	1.4925	1.17986
aPFC0120w_0	aPFC0120w_0::PFC0120w::Cytoadherence linked asexual protein, CLAG	2.31551	2.86007	4.68047	5.0447	4.87028	2.23136	2.89218	3.61146	5.22131	4.52355	1.18213	0.969817	0.902263	0.93373	0.86245
aMAL13P1.351_2	aMAL13P1.351_2::MAL13P1.351::hypothetical protein	1.67533		1.25127	1.02564	0.755627	1.49708	1.43265	1.27498	1.09015	0.991427	1.29042	1.51447	1.45519	1.31727	1.42519
aPFL0390c_1	aPFL0390c_1::PFL0390c::hypothetical protein	0.738258	0.797796	0.482967	0.595029	0.552189	0.705751	0.523639	0.738948	0.443184	0.452608	0.664131	0.811325	0.626957	0.704586	0.684143
aMAL13P1.132_0	aMAL13P1.132_0::MAL13P1.132::microfibril-associated protein homologue, putative	1.24589	0.975578	0.876933	0.788153	0.874936	0.985727	0	0.900813	0	0	1.38045	1.56605	1.41586	1.56847	1.54027
aPF14_0394_0	aPF14_0394_0::PF14_0394::hypothetical protein	1.4341	1.59337	1.58764	1.08045	1.00342	1.66718	1.70407	1.62451	1.4407	1.46812	1.97543	2.06794	1.79643	1.90177	1.99932
aPFE0440w_2	aPFE0440w_2::PFE0440w::hypothetical protein	1.65545	1.91893	2.68577	1.96777	1.8906	1.95561	2.58107	3.71351	4.50452	4.36634	2.66175	3.05662	2.89187	3.0144	3.02111
aPFA0220w_0	aPFA0220w_0::PFA0220w::ubiquitin carboxyl-terminal hydrolase, putative	0.437388	0.392231	0.462026	1.3623	2.37548	0.477544	0.485231	0.428121	0.494485	0.488107	0.384909	0.376103	0.367846	0.362709	0.364202
aPF11_0395_5	aPF11_0395_5::PF11_0395::guanylyl cyclase	1.85691	3.07674	3.43313	2.14915	2.16593	2.14789	2.7091	3.25372	3.22912	3.01232	1.91672	2.26668	2.42223	2.37109	2.36478
aPFI0335w_0	aPFI0335w_0::PFI0335w::hypothetical protein	0.882729	0.671127	0.479041	0.431918	0.451235	0.731107	0.708001	0.607579	0.485935	0.503321	0.874201	0.838999	0.829388	0.879814	0.897859
aPF11_0353_0	aPF11_0353_0::PF11_0353::hypothetical protein	0.808506	0.617792	0.489512	0.551968	0.521597	0.811402	0.696479	0.754196	0.621313	0.647851	0.896382	0.884282	0.994802	0.948434	1.06352
aPF14_0221_0	aPF14_0221_0::PF14_0221::hypothetical protein, conserved	0.869475	0.853353	0.90311	0.688981	0.740331	0.800837	1.14074	1.28084	1.1044	1.51503	1.01512	0.99749	1.16137	1.02808	1.23424
aPF10_0308_1	aPF10_0308_1::PF10_0308::hypothetical protein	1.32144	1.9956	4.96972	7.23691	7.69087	1.33015	2.124	4.13342	7.75358	7.09847	0.940744	0.792457	0.676697	0.624937	0.521011
aPFF0715c_0	aPFF0715c_0::PFF0715c::endonuclease iii homologue, putative	1.25385	1.26114	1.01305	0.81947	0.897881	1.12624	1.31358	1.18349	0.981845	1.14356	1.25389	1.37988	1.18682	1.11631	1.31264
aPFD0665c_0	aPFD0665c_0::PFD0665c::26s proteasome aaa-ATPase subunit Rpt3	2.40961	1.90893	1.9947	1.79161	1.57703	2.17536	2.41207	2.19456	2.34132	2.20345	2.23378	2.18366	1.79643	1.70816	1.72237
aPF13_0097_1	aPF13_0097_1::PF13_0097::hypothetical protein	0.852244	1.15003	0.972479	0.764665	0.881055	0.521917	0.960219	0.774136	1.0531	1.15244	0.763295	0.967301	0.813193	0.649444	0.890271
aPF14_0491_1	aPF14_0491_1::PF14_0491::hypothetical protein	0.803204	1.50448	2.56797	1.4419	0.871877	0.719485	0.618381	0.659188	1.79126	1.87636	0.566273	1.14592	1.69579	0	1.56809
aPF14_0095_0	aPF14_0095_0::PF14_0095::hypothetical protein	0.805855	0.756684	0.695002	0.600249	0.610314	0.965653	0.610699	0.754196	0.547211	0.575586	1.02555	1.28932	0.990175	1.21066	1.13434
aPF14_0538_2	aPF14_0538_2::PF14_0538::hypothetical protein	1.44603	1.88338	1.48555	0.925166	0.983539	1.68725	2.19186	1.67495	1.34523	1.4808	2.64217	3.01637	2.44189	2.45441	2.84027
aPFC1095w_0	aPFC1095w_0::PFC1095w::rifin (3D7-rifT3-5)	0.194837				0.223323	0.242998	0.162597	0.280331	0.155328	0	0.20224	0.256605	0.277619	0	0.145428
aPF10_0090_0	aPF10_0090_0::PF10_0090::hypothetical protein		1.54115	1.26435	0.879495	0.780101	1.0132	1.1369	1.13071	1.01035	1.032	1.69882	1.70441	1.79527	1.98019	1.8463
aPFL0635c_1	aPFL0635c_1::PFL0635c::bromodomain protein, putative	0.950325	0.805574	0.722488	0.782933	0.890232	0.937127	1.06392	0.953595	0.815117	0.748008	0.914649	0.766042	0.958943	1.01215	1.0572
aPF10_0364_0	aPF10_0364_0::PF10_0364::hypothetical protein	0.353887	0.513345	0.465952	0.618517	0.572074	0.587421	0.370004	0.510226	0.353407	0.327095	0.414919	0.522016	0.557552	0.559993	0.632295
aMAL13P1.193_1	aMAL13P1.193_1::MAL13P1.193::hypothetical protein	1.14251	0.932244	0.91489	0.772494	0.916236	0.924449	1.26493	0.957113	1.05737	1.00918	0.986411	1.05787	0.940435	0.866334	0.993968
aPFB0655c_1	aPFB0655c_1::PFB0655c::hypothetical protein	0.389673	0.308896	0.366479	0.396686	0.399228	0.377175	0.361042	0.388241	0.287856	0.424716	0.443624	0.455349	0.557552	0.582049	0.53998
aPF13_0071_1	aPF13_0071_1::PF13_0071::hypothetical protein	1.00732	0.721128	0.488203	0.441052	0.484886	0.876906	0.693918	0.609925	0.463134	0.528677	1.37132	1.38617	1.48064	1.57337	1.5858
aPF08_0036_1	aPF08_0036_1::PF08_0036::protein transport protein	1.2777	1.29114	1.56016	1.65982	1.34606	1.30374	1.54403	1.52599	2.2829	1.74577	1.35697	1.44152	1.40892	1.30134	1.35185
aPF10_0181_1	aPF10_0181_1::PF10_0181::hypothetical protein	0.604391	0.593347	0.89133	0.644615	0.763275	0.350762	0.48395	0.425775	0.684014	0.761954	1.4744	1.61385	1.81725	1.92383	1.91332
aORF78_0	aORF78_0::ORF78::	0.941047	0.416676	3.24334	1.50715	0.985068	0	0.147234	0.179459	0.212329	0.272579	0.369252	0.18868	0.213998	0.113959	0.316148
aPF10_0177_3	aPF10_0177_3::PF10_0177::erythrocyte membrane-associated antigen	1.52688	2.19672	2.70409	2.60847	2.63552	2.01583	2.40183	3.20093	4.20384	3.38632	2.05633	2.10316	1.93871	1.86991	1.77928
aMAL7P1.55_3	aMAL7P1.55_3::MAL7P1.55::erythrocyte membrane protein 1 (PfEMP1)	0.0357863	0.0266673	0.0431922	0.0456711	0.0428291	0.0285259	0.0294467	0.035188	0.0270756	0.0329631	0.0378385	0.0264152	0.0266052	0.0208312	0.0316147
aPF14_0711_1	aPF14_0711_1::PF14_0711::hypothetical protein, conserved	0.952976	0.886687	0.540557	0.520651	0.477238	0.858945	0.782258	0.70376	0.570012	0.53248	0.773733	0.929565	0.832858	0.90187	0.866244
aMAL13P1.296_3	aMAL13P1.296_3::MAL13P1.296::hypothetical protein	1.77076	1.67115	2.98681	2.4545	3.08675	2.17008	2.82817	3.57041	4.45892	3.59171	1.27477	1.5346	1.78486	1.40305	1.74261
aPF13_0252_1	aPF13_0252_1::PF13_0252::nucleoside transporter 1	0.792601	0.616681	0.438466	0.375808	0.423702	1.1442	0.934613	0.5677	0.531536	0.442466	1.01512	0.994974	0.934652	0.942307	0.943384
aPFL1390w_1	aPFL1390w_1::PFL1390w::hypothetical protein	1.90198	2.70117	2.01825	1.21616	1.22216	2.14683	2.30068	1.82156	1.89814	2.27699	2.49212	1.98114	1.70967	1.66282	1.79319
aPFA0375c_1	aPFA0375c_1::PFA0375c::patched family protein, putative	0.479802	0.407787	0.356009	0.836434	1.59079	0.611721	0.52492	0.455098	0.48166	0.4805	0.643255	0.605035	0.559866	0.586951	0.555155
aPFI1500w_4	aPFI1500w_4::PFI1500w::hypothetical protein	2.456	1.75782	1.74601	1.60632	1.42713	2.04435	2.22259	2.03269	1.74709	1.49855	1.47179	1.31573	1.09891	1.0771	1.17101
aPFC0950c_1	aPFC0950c_1::PFC0950c::peptidase, putative	0.913214	0.958911	0.681913	0.625042	0.617962	1.22556	1.08697	0.904331	0.73959	0.734062	0.989021	0.99749	0.923084	0.987646	0.853598
aPFI0260c_5	aPFI0260c_5::PFI0260c::hypothetical protein	0.257131		0.324596	0.473675		0.232433	0.234293	0	0.542936	0	1.37263	1.50064	1.17641	1.13714	0.969941
aPFB0880w_0	aPFB0880w_0::PFB0880w::hypothetical protein, conserved	0.455944	0.356675	0.30889	0.323612	0.286037	0.352875	0.341838	0.274466	0.22658	0.366397	0.477548	0.520758	0.586471	0.653121	0.679085
aPFI0295c_2	aPFI0295c_2::PFI0295c::hypothetical protein	1.6581	1.28447	1.05625	0.909508	0.86117	1.65767	1.12026	0.901985	0.597087	0.836755	1.84495	1.99875	1.74669	1.71429	1.68064
aMAL8P1.25a_0	aMAL8P1.25a_0::MAL8P1.25::hypothetical protein	1.18095	1.15003	0.759136	0.699421	0.830578	0.795554	1.04088	0.802286	0.483085	0.784774	1.05296	0.88554	0.781961	0.73522	0.906711
aPFF0835w_0	aPFF0835w_0::PFF0835w::hypothetical protein	1.45001	1.21892	0.951538	0.825995	0.740331	1.28895	1.36223	1.12484	0.820817	0.969875	1.46657	1.22139	1.29093	1.41162	1.30759
aPFC1016w_0	aPFC1016w_0::PFC1016w::hypothetical protein	0.335331	0.353342	0.236903	0.151367	0.247797	0.245111	0.110105	0.20409	0.196654	0	0.366642	0.397487	0.259111	0.227918	0.653793
aPF14_0614_2	aPF14_0614_2::PF14_0614::hypothetical protein	0.707774	0.463344	0.48035	1.4145	2.26076	0.665603	0.678555	0.517263	0.508735	0.557836	0.533654	0.428933	0.434937	0.457062	0.505836
aPF10_0208_0	aPF10_0208_0::PF10_0208::hypothetical protein, conserved	1.40362	1.27114	1.37822	1.04391	0.761745	1.74113	1.60037	1.38758	1.11865	0.846897	1.06731	1.15095	1.10122	1.12244	1.11157
aPFL0050c_0	aPFL0050c_0::PFL0050c::hypothetical protein	0.422809	0.353342	0.323287	0.283161	0.365577	0.498674	0.492912	0.376512	0.350557	0.35879	0.413614	0.362266	0.419899	0.40192	0.376848
aPF13_0033_0	aPF13_0033_0::PF13_0033::26S proteasome regulatory subunit, putative	1.79197	1.68337	1.66094	1.468	1.28334	1.81509	2.06767	1.98108	1.75991	1.82691	2.20377	2.14215	1.91557	2.08557	1.93482
aPF14_0419_1	aPF14_0419_1::PF14_0419::hypothetical protein	0.933095	1.07002	1.28791	1.77726	1.85236	1.11779	1.416	1.90015	2.5337	2.32897	0.401871	0.369813	0.336613	0.327173	0.345233
aPF11_0342_1	aPF11_0342_1::PF11_0342::hypothetical protein	2.03187	1.59337	1.32587	1.18092	0.998835	1.88799	1.99982	1.76761	1.63878	1.55687	2.66827	2.81511	2.94855	2.80487	3.10963
aPFD0945c_1	aPFD0945c_1::PFD0945c::hypothetical protein	1.81582	1.84338	1.34943	1.10785	1.23898	1.53723	1.82826	2.02566	2.05489	2.5876	1.49006	2.06039	2.42917	2.21179	2.12704
aPF11_0079_2	aPF11_0079_2::PF11_0079::hypothetical protein	1.44073	1.32114	1.4332	1.40015	0.902469	1.36713	1.12538	0	1.07447	0.441198	1.32174	0.733338	1.43437	1.43	1.47578
aPF14_0417_0	aPF14_0417_0::PF14_0417::heat shock protein, putative	1.83438	1.3067	0.990803	0.639396	0.903999	1.74536	1.72327	1.11194	0.820817	0.92043	1.7484	1.91573	1.6981	1.60278	1.67685
aPFD0430c_0	aPFD0430c_0::PFD0430c::hypothetical protein			0.323287	0.417564	0.249326	0	0	0	0.373358	0.38795	0.274003	0.172328	0.19549	0.254876	0.361673
aPF08_0022_0	aPF08_0022_0::PF08_0022::hypothetical protein, conserved in P. falciparum	1.78401	1.57115	1.24865	1.12481	0.692913	1.72106	1.51587	1.47203	1.33098	0.924233	1.17821	1.06164	1.14981	1.2413	1.21148
aPF13_0187_0	aPF13_0187_0::PF13_0187::hypothetical protein	2.86158	2.20672	1.70151	1.34012	1.23745	2.16691	2.19314	1.74415	1.60316	0	3.51115	4.12329	3.62409	4.05719	4.32743
aPFE0325w_1	aPFE0325w_1::PFE0325w::hypothetical protein	1.29493	1.28559	1.35466	1.10002	1.36135	1.07976	1.27901	1.09552	1.264	1.11187	1.34392	1.53586	1.83229	0	1.81469
aPFE0110w_0	aPFE0110w_0::PFE0110w::hypothetical protein	1.41687	1.29559	1.1832		0.907058	1.62386	1.45697	1.50018	0	1.30711	1.73274	1.65536	1.75132	1.94833	1.86527
aMAL7P1.147_2	aMAL7P1.147_2::MAL7P1.147::ubiquitin carboxyl-terminal hydrolase, putative	1.55869	1.7956	1.52743	1.27227	1.10744	1.7443	1.75784	1.64914	1.63308	1.28176	2.12548	2.29687	2.20245	2.27673	2.35467
aPF11_0201_3	aPF11_0201_3::PF11_0201::hypothetical protein	1.5799	1.37892	1.47901	1.35578	1.08602	1.73057	1.70023	1.59988	1.68011	1.14737	1.16647	1.24906	1.16484	1.05136	1.21021
aPFC0370w_1	aPFC0370w_1::PFC0370w::hypothetical protein	0.53812	0.892243	2.3795	3.22047	3.73683	0.547274	1.09337	2.27666	4.10123	3.93148	0.326194	0.349688	0.305381	0.290412	0.336381
aMAL13P1.35_0	aMAL13P1.35_0::MAL13P1.35::u1 small nuclear ribonucleoprotein a, putative	1.07491	1.0478		1.06609	1.0386	1.21182	1.28797	1.27498	1.42788	1.22217	1.23693	1.19246	1.2944	1.53661	1.40749
atRNA_RNAAla_0	atRNA_RNAAla_0::tRNA_RNA-Al::	2.2161	1.61004	1.49079	1.27096	1.04625	2.43632	2.47736	2.00454	2.01784	1.5911	1.35566	1.17737	1.30828	1.07465	0.910505
aPFF0575c_0	aPFF0575c_0::PFF0575c::hypothetical protein	1.84366	1.84227	1.64523	2.17264	1.69022	1.40305	1.70791	2.41272	3.04956	3.05923	1.78624	1.93083	2.64201	2.76443	2.96293
aPF14_0646_0	aPF14_0646_0::PF14_0646::hypothetical protein	1.97487	2.08116	1.7892	1.32316	1.06002	1.60167	1.75528	1.47672	1.07875	1.14483	1.73666	1.89561	1.70273	1.72164	1.73122
aPFB0755w_1	aPFB0755w_1::PFB0755w::hypothetical protein	3.36391	2.93896	2.63211	1.93906	1.65198	2.65713	2.55418	0	2.31995	2.15654	4.27314	5.10192	5.40895	5.89647	6.38491
aPFI0785c_1	aPFI0785c_1::PFI0785c::transporter, putative	1.83173	2.2445	3.54569	5.09037	4.94828	1.69887	2.45048	3.84722	5.27831	4.82655	1.05556	1.23145	1.22152	1.12244	1.12422
aMAL8P1.16_0	aMAL8P1.16_0::MAL8P1.16::hypothetical protein	0.397626	0.661127	0.485585		0.322747	0.516635	0	0.517263	0	0.517266	0.510168	0.615098	0.484677	0.514654	0.652528
aPF14_0698_0	aPF14_0698_0::PF14_0698::hypothetical protein	0.37907	0.411121	0.284022		0.166727	0.377175	0.253498	0.43985	0.332032	0.344844	0.311842	0.529563	0.659346	0.786686	0.959824
aMAL13P1.351_1	aMAL13P1.351_1::MAL13P1.351::hypothetical protein	1.33205	1.23447	1.02222	0.922557	0.871877	1.50025	1.31998	1.19287	1.04312	1.00664	1.47701	1.18365	1.12551	1.05504	1.27218
aPF13_0155_2	aPF13_0155_2::PF13_0155::hypothetical protein	3.11341	2.76673	2.43578	2.01083	2.08639	2.31165	2.58107	2.62268	2.28575	2.41391	3.16669	3.40505	2.78892	2.69826	2.65311
aPF07_0111_1	aPF07_0111_1::PF07_0111::hypothetical protein	1.05901	0.82113	1.01305	0.850788	0.656202	1.04489	0.951257	0.897294	0.856442	0.682082	1.17169	1.04655	1.225	1.32217	1.00914
aPFL0150w_1	aPFL0150w_1::PFL0150w::origin recognition complex 1 protein	1.51098	1.58559	1.26435	1.05566	0.89941	1.85629	1.58628	1.3735	1.33098	1.19047	2.39557	2.45536	2.46965	2.80732	2.74416
aPFB0265c_2	aPFB0265c_2::PFB0265c::DNA repair endonuclease, putative	1.26843	0.984467	1.20284	1.29836	1.43018	1.05123	1.14714	1.11898	1.23835	1.24119	1.09993	0.976106	1.09081	1.05504	0.950972
aPF07_0033_0	aPF07_0033_0::PF07_0033::Cg4	0.903936	0.804463	0.735576	0.625042	0.46959	1.13364	0.924371	0.885564	0.718215	0.557836	1.15081	1.46919	1.7062	1.84663	1.73628
aPF14_0760_0	aPF14_0760_0::PF14_0760::hypothetical protein	0.609693	0.53779	0.683222	0.70203	1.19004	0.574743	0.682396	0.573564	0.699689	0.540087	0.254432	0.231448	0.212841	0.241397	0.26177
aPFE0410w_0	aPFE0410w_0::PFE0410w::triose or hexose phosphate / phosphate translocator, putative	1.94837	1.69448	1.08766	0.926471	0.804574	2.25777	1.68486	1.20929	1.00465	0.760686	2.08764	2.01762	2.10528	1.99857	2.03978
aPF11_0060_0	aPF11_0060_0::PF11_0060::hypothetical protein	0.288941	0.483345	2.59808	5.90854	6.04349	0.291598	0.585093	1.58932	3.67657	4.00121	0.103077	0.0943402	0.0890695	0.109058	0.115078
aPF14_0708_2	aPF14_0708_2::PF14_0708::hypothetical protein	0.479802	0.774463	1.1374	1.39493	1.78046	0.591647	0.499314	0.930136	1.25973	1.53151	0.570188	0.632708	0.534417	0.610233	0.804279
aPFB0450w_0	aPFB0450w_0::PFB0450w::Sec61-gamma subunit of protein trans	1.6687	1.54226	1.29577	1.15222	1.04625	1.69993	1.53763	1.36178	1.2754	1.08778	1.98196	1.87171	1.64489	1.92995	1.6427
aPF07_0042_4	aPF07_0042_4::PF07_0042::hypothetical protein	0.375094	0.317785	0.287948	0.317088	0.357929	0.285259	0.190764	0.26391	0.313506	0.437394	0.401871	0.355977	0.193177	0.306342	0.227626
aPF14_0268_0	aPF14_0268_0::PF14_0268::hypothetical protein	1.93776	1.74893	1.32325	1.07131	0.968243	2.19755	2.14321	1.66556	1.13147	1.49094	2.79222	2.94593	2.86758	3.03156	3.207
aMAL7P1.123_0	aMAL7P1.123_0::MAL7P1.123::hypothetical protein	1.51893	3.85231	3.1923	3.12782	3.08981	2.34757	2.46584	3.11179	2.97404	3.22784	1.17691	1.28554	0.930025	0.796489	0.804279
aPF14_0204_1	aPF14_0204_1::PF14_0204::hypothetical protein	1.41422	1.2167	2.18448	2.35402	2.26841	1.07659	1.10745	2.08899	2.66908	2.34165	1.45352	1.35598	1.25044	1.34055	1.16469
aMAL7P1.171_0	aMAL7P1.171_0::MAL7P1.171::hypothetical protein	0.227972	0.174449	0.18324	0.197038	0.198849	0.219755	0.208688	0.222857	0.182404	0.201582	0.168316	0.179875	0.166572	0.174002	0.177043
aPFI1465w_0	aPFI1465w_0::PFI1465w::hypothetical protein	0.437388		0.708091	0.537614	1.02025	0.4786	0	0.411699	0.359107	0.708706	0.652389	0.251574	0.28456	0.379864	0.547567
aPFL1025c_0	aPFL1025c_0::PFL1025c::hypothetical protein	2.11802	2.0856	2.65305	3.01951	2.738	1.94187	2.73726	4.50289	5.15718	5.13463	1.38045	1.5585	1.5593	1.59543	1.48716
aPF14_0708_1	aPF14_0708_1::PF14_0708::hypothetical protein	0.528842		1.27875	1.04913	1.66727	0.370836	0.595336	0.822226	0.907744	1.50235	0.69936	0.763526	0.658189	0.858982	0.821983
aPFL1920c_0	aPFL1920c_0::PFL1920c::hydroxyethylthiazole kinase, putative	1.14251	1.57004	1.26043	0.708555	0.636317	1.83728	0.442981	1.25504	1.0132	1.0003	0.938135	1.21384	1.10238	1.06117	1.28229
aPF13_0260_0	aPF13_0260_0::PF13_0260::hypothetical protein, conserved	3.02593	3.79342	3.25381	2.19743	2.66305	2.67298	3.16616	2.90536	2.53228	2.96414	2.26509	1.95095	1.46907	1.45206	1.56683
aPFF0915w_0	aPFF0915w_0::PFF0915w::N-acetylglucosamine transferase	2.74892	2.13672	2.10071	1.52933	1.46537	2.44688	2.94083	2.71182	2.53655	2.6624	2.2664	2.16605	1.86815	1.7486	1.84377
aPFE1345c_1	aPFE1345c_1::PFE1345c::minichromosome maintenance protein 3, putative	2.6124	2.06894	1.75256	1.2814	1.22063	1.95666	2.72062	1.98108	1.98507	2.08808	2.3486	2.83146	2.98672	2.62841	2.91741
aMAL13P1.380_5	aMAL13P1.380_5::MAL13P1.380::chloroquine resistance marker protein, putative	1.49507	1.76115	3.78521	3.26092	4.37468	1.09666	2.05615	3.25137	5.67019	5.1359	0.773733	0.825162	0.736848	0.698459	0.758754
aPF14_0542_0	aPF14_0542_0::PF14_0542::hypothetical protein, conserved	0.477151	0.4789	0.460717	0.331442	0.347221	0.509239	0.678555	0.458617	0.351982	0.398092	0	0.441512	0.374786	0.328398	0.356614
aMAL13P1.119_1	aMAL13P1.119_1::MAL13P1.119::cAMP-specific 3',5'-cyclic phosphodiesterase 4B, putative	0.408229	0.905577	0.545793	0.429308	0.610314	0.32435	0.256058	0.430466	0	1.4098	0.775038	0.782394	0.345867	0.503626	0.58677
aPF11_0097_0	aPF11_0097_0::PF11_0097::succinyl-CoA synthetase alpha subunit, putative	2.47853	2.32339	1.96983	1.74072	1.6841	2.21234	2.04975	2.01393	2.00217	0	2.73873	2.41008	1.67844	1.59665	1.5605
aPFI1160w_1	aPFI1160w_1::PFI1160w::hypothetical protein	1.53351	1.34225	1.37692	1.40537	1.38277	1.05334	1.35711	1.35005	1.70433	1.67985	1.35175	1.2541	1.58243	1.44471	1.31264
aPFC0105w_0	aPFC0105w_0::PFC0105w::serine/threonine protein kinase, putative	0.787299	0.775574	0.52616	0.559797	0.529245	0.813515	0.741289	0.634557	0.528686	0.472893	0.769818	0.7912	0.823604	0.890842	0.953501
aPFL1155w_0	aPFL1155w_0::PFL1155w::GTP cyclohydrolase I	1.06166	0.656682	0.544484	0.450187	0.400758	0.77865	0.784819	0.582948	0.407558	0.457679	1.07905	1.08554	1.04454	1.06729	1.07237
aPF14_0366_1	aPF14_0366_1::PF14_0366::small subunit DNA primase	1.58122	1.37781	1.07588	0.921252	0.767864	1.89433	1.74888	1.38054	1.17137	0.934376	1.6662	1.62139	1.45287	1.27316	1.39737
aMAL13P1.125_0	aMAL13P1.125_0::MAL13P1.125::hypothetical protein	0.383046	0.477789	0.664898	0.579371	0.570544	0.351819	0.403292	0.423429	0.46741	0.71758	0.52713	0.577362	0.57259	0.612684	0.7714
aMAL13P1.308_2	aMAL13P1.308_2::MAL13P1.308::hypothetical protein, conserved	0.937071	1.34003	2.97503	5.06166	5.62437	1.09772	1.58628	2.24499	3.34027	3.45098	0.718932	0.651576	0.610762	0.544063	0.557684
aPFF1240w_0	aPFF1240w_0::PFF1240w::poly(A) polymerase PAP, putative	0.862848		0.786622	0.849483	0.787749	1.03961	0.956378	1.03805	1.08302	0.911555	0.896382	1.15095	1.17063	1.33197	1.24436
aPF11_0443_0	aPF11_0443_0::PF11_0443::hypothetical protein, conserved	2.0597	1.61226	1.95805	1.74986	1.19157	1.9218	2.71166	2.49131	2.40402	2.11978	1.71578	1.57234	1.3372	1.29399	1.32403
aPF11_0521_4	aPF11_0521_4::PF11_0521::erythrocyte membrane protein 1 (PfEMP1)	0.0490405	0.0222227	0.0261771			0.0676168	0	0.0422256	0	0	0.0247908	0.0201259	0	0	0
aPFD1045w_0	aPFD1045w_0::PFD1045w::	3.11606	3.08452	2.69755	1.71201	1.64892	3.29104	3.69236	2.61799	2.37552	2.1819	2.56128	2.18743	2.0405	1.72654	2.04864
aPF07_0101_2	aPF07_0101_2::PF07_0101::hypothetical protein	2.27972	2.28672	2.77085	2.84596	2.97509	1.99153	2.1112	3.36984	2.81443	3.6627	3.25672	3.36732	2.96243	3.00828	2.58229
aPF14_0170_3	aPF14_0170_3::PF14_0170::hypothetical protein	1.24457	1.10003	1.27352	1.35317	1.13038	1.28472	1.25981	1.35826	1.56896	1.44404	1.18082	1.1673	1.33257	1.31482	1.29494
aPFF1365c_5	aPFF1365c_5::PFF1365c::null	1.33735	1.44003	3.58103	4.92074	4.68213	1.33543	2.11248	3.75925	5.97087	6.26552	0.666741	0.638997	0.626957	0.60043	0.720816
aPF14_0318_0	aPF14_0318_0::PF14_0318::hypothetical protein	2.01861	1.57893	1.34419	0.963008	0.806104	1.42735	1.27005	1.11781	0.862143	0.82788	1.66359	2.03397	1.7999	1.87971	2.01449
aPFI0565w_1	aPFI0565w_1::PFI0565w::hypothetical protein	2.33009	1.27225	1.63083	1.33751	1.30476	2.65607	2.63356	2.36463	1.71146	2.36827	3.24368	3.0365	2.57376	2.42255	2.49377
aPFL1985c_1	aPFL1985c_1::PFL1985c::hypothetical protein	2.06103	1.85004	1.79051	1.51889	1.34606	1.63126	1.77705	1.68199	1.30248	1.58603	1.95717	2.48555	2.63854	3.13326	3.3499
aPFC0110w_0	aPFC0110w_0::PFC0110w::Cytoadherence linked asexual protein, CLAG	1.82245	1.49892	3.19099	3.56887	3.18923	1.44108	2.2021	2.63323	4.23091	3.74384	0.673265	0.566041	0.587627	0.53426	0.52354
aPFC0095c_0	aPFC0095c_0::PFC0095c::hypothetical protein	0.783323	0.71335	0.519615	0.490638	0.495593	0.926562	0.906447	0.790557	0.589962	0.600942	0.548006	0.449059	0.452288	0.465639	0.499513
aPF10_0312_0	aPF10_0312_0::PF10_0312::hypothetical protein	1.5693	1.80115	1.8324	0.953874	1.37665	1.5256	1.90635	1.79459	1.54901	1.96257	1.61009	1.18114	1.19029	1.03911	1.23803
aPFE1330c_1	aPFE1330c_1::PFE1330c::hypothetical protein	2.32478	1.84449	1.39262	1.00868	0.913177	2.04224	0	1.41456	1.10725	0.892538	1.83843	2.36479	1.98845	1.80497	2.11566
aPFF1340w_1	aPFF1340w_1::PFF1340w::hypothetical protein	0.645479	0.688905	0.552337	0.579371	0.682206	0.442679	0.317512	0.441023	0.463134	0.524873	0.715018	0.832709	0.869874	0.964364	0.87889
aPFF0095c_2	aPFF0095c_2::PFF0095c::hypothetical protein	1.74823	1.65115	1.14787	1.24095	1.45619	1.58794	1.00759	1.59753	1.51196	1.64689	0.878115	1.00755	1.15675	1.25233	1.3
aMAL13P1.66_3	aMAL13P1.66_3::MAL13P1.66::hypothetical protein	0.383046	0.423343		0.307954	0.576663	0.238772	0.335436	0.409354	0.514435	0.826612	0.73198	1.11573	0.991332	0.987646	1.3784
aPF10_0232_0	aPF10_0232_0::PF10_0232::hypothetical protein	1.39699	1.08225	1.14001	1.66243	1.9013	1.32064	1.47746	1.54827	1.75136	1.72422	1.5579	1.79121	1.74784	1.86256	1.87033
aPFC0720w_1	aPFC0720w_1::PFC0720w::hypothetical protein	2.36852	2.06005	2.19888	2.24049	1.87683	1.96723	1.83722	2.16523	2.32565	2.19711	2.51822	2.02768	2.21633	2.48995	2.10807
aMAL8P1.26_0	aMAL8P1.26_0::MAL8P1.26::hypothetical protein	1.72967	1.64448	1.1086	0.952569	1.0126	1.34811	1.66182	1.06268	1.03885	1.00284	1.15995	1.00126	0.926554	1.01951	1.03949
aPF13_0187_1	aPF13_0187_1::PF13_0187::hypothetical protein	2.16839	2.53561	1.97506	1.25008	1.20839	1.89855	2.21619	1.93417	1.55186	1.86875	3.43809	3.06668	2.93351	2.37231	2.50136
aPF11_0172_0	aPF11_0172_0::PF11_0172::hypothetical protein, conserved	2.44407	2.24339	2.57844	3.69023	3.01792	2.30425	2.40567	2.58749	2.89566	2.48364	1.15995	0.871703	0.793528	0.753601	0.761283
ac11rRNA18s_1	ac11rRNA18s_1::c11rRNA18s::	0.446666	0.385565	0.638721	0.593725	0.562896	0.482826	0.641426	0.802286	0.480235	0.592067	0.302708	0.454091	0.624643	0.360258	0.735991
aPF07_0085_1	aPF07_0085_1::PF07_0085::ferrodoxin reductase-like protein	1.01262	0.843353	0.83505	0.692896	0.504771	1.06708	0.992226	0.809324	0.609912	0.574318	1.04382	1.22768	1.23772	1.42143	1.25574
ac7rRNAITS2_0	ac7rRNAITS2_0::c7rRNAITS2::	1.34795	1.26225	0.946302	0.694201	0.712798	1.46644	1.45057	1.27615	0.662638	0.966071	1.43395	1.42139	3.75943	2.22282	2.23959
aPFL1110c_0	aPFL1110c_0::PFL1110c::cAMP-dependent protein kinase regulatory subunit, putative	1.62496	1.90004	3.15041	4.38051	6.0909	1.64499	2.00494	2.39513	2.45818	4.18758	1.55529	1.69561	1.53385	1.5942	1.44796
aPFD0320c_5	aPFD0320c_5::PFD0320c::hypothetical protein	1.38241	1.26114	1.07064	0.906898	0.902469	1.16639	1.32382	1.61396	1.55898	1.85227	1.63619	1.72076	1.60094	1.53048	1.50992
aPF11_0091_1	aPF11_0091_1::PF11_0091::hypothetical protein	0.921166	1.15558	2.55227	3.24395	4.63777	0.816685	1.31614	2.99567	4.50594	5.20563	0.431881	0.480506	0.446504	0.36761	0.442606
aPF13_0118_1	aPF13_0118_1::PF13_0118::hypothetical protein	1.52953	1.3667	0.858609	0.771189	0.749508	1.5013	1.25085	0.86797	0.732465	0.619959	2.0485	1.91448	1.61482	1.78536	1.67052
aPFC0755c_2	aPFC0755c_2::PFC0755c::protein kinase, putative	2.39238	1.91671	2.24992	2.04346	1.90283	2.16163	2.5465	2.43618	2.19882	2.21233	1.50963	1.9497	1.65068	1.70694	1.66799
aPFL1950w_0	aPFL1950w_0::PFL1950w::erythrocyte membrane protein 1 (PfEMP1)	0.193511	0.142226				0.260959	0.139552	0.301444	0.0840767	0.0443733	0.140916	0.11195	0.0844425	0.0490147	0.0872567
aPF10_0078_1	aPF10_0078_1::PF10_0078::hypothetical protein	1.90463	1.36114	1.45152	1.31533	1.12732	1.81509	2.12144	2.15468	1.85824	2.05512	1.92716	1.78114	1.79411	2.03411	1.91206
aPF14_0275_0	aPF14_0275_0::PF14_0275::hypothetical protein	1.24987	1.40892	1.22771	1.20833	1.17168	1.46855	0	1.36647	1.02887	1.06369	1.40394	1.29938	1.0804	1.10283	1.08755
aMAL7P1.146_1	aMAL7P1.146_1::MAL7P1.146::hypothetical protein	1.92716	1.86115	1.76565	1.66373	1.24357	2.06337	1.93452	2.14881	2.33135	1.64562	2.28205	2.13838	2.12957	2.07455	2.19533
aPF11_0508_0	aPF11_0508_0::PF11_0508::hypothetical protein	1.55604	1.51781	0.812799	0.634176	0.653143	1.48757	1.70919	0.898467	0.581412	0.731526	1.44308	1.80882	1.62523	1.46799	1.67938
aPF07_0120_3	aPF07_0120_3::PF07_0120::hypothetical protein	2.2214	1.88004	1.52874	1.23312	1.10285	2.23241	2.40311	2.10893	1.84399	1.5911	2.49082	2.71951	2.77272	2.71296	2.76692
aMAL13P1.356_1	aMAL13P1.356_1::MAL13P1.356::erythrocyte membrane protein 1 (PfEMP1)	0.223996	0.265562	0.264389		0.189672	0.367667	0.157476	0.540722	0.198079	0.197778	0.434491	0.338367	0	0.131114	0.225097
aMAL7P1.115_0	aMAL7P1.115_0::MAL7P1.115::hypothetical protein	1.00467	1.17336	0.968553	0.716384	0.818341	1.06919	0.990946	0.985264	0.887793	0.89127	1.32043	1.25787	1.05958	1.17145	1.03064
aPF11_0226_1	aPF11_0226_1::PF11_0226::hypothetical protein			0.507836	1.75116	2.95673	0	0	0	0.377633	0.673207	0.137002	0.11824	0	0	0
aPF10_0056_0	aPF10_0056_0::PF10_0056::hypothetical protein	0.319426	0.637793	0.532704	0.369284	0.338044	0.459583	0.257339	0.408181	0.270756	0.433591	2.102	2.22517	1.5003	1.96794	1.91332
aPFB0335c_0	aPFB0335c_0::PFB0335c::cysteine protease, putative	3.49248	3.18007	2.71064	2.10087	1.45925	2.72792	3.40814	3.04963	2.77168	2.15528	2.95141	2.65662	2.13304	2.09783	1.83366
aPFI0905w_0	aPFI0905w_0::PFI0905w::hypothetical protein	1.74955	1.59337	1.78266	1.7094	1.53726	2.1014	1.89099	1.95293	2.13469	1.87889	1.58922	1.85158	2.00811	2.0868	2.21303
aPF14_0501_1	aPF14_0501_1::PF14_0501::hypothetical protein	1.53881	1.66893	1.93711	1.85686	1.81259	1.55836	1.51971	1.98343	2.93841	2.37841	1.69751	1.92202	1.69348	1.79149	1.83366
aPF13_0024_0	aPF13_0024_0::PF13_0024::hypothetical protein	1.34928	1.82449	1.54445	1.08697	1.11967	1.53617	2.03822	1.76996	1.55898	1.7724	1.858	2.64404	2.27879	2.03533	2.48492
aPF14_0200_1	aPF14_0200_1::PF14_0200::hypothetical protein	1.76678	1.49337	0.876933	0.755531	0.702091	1.589	1.27645	0.999339	0.877818	0.745472	2.40862	2.72203	2.4685	2.56714	2.57597
aMAL7P1.145_1	aMAL7P1.145_1::MAL7P1.145::DNA mismatch repair protein pms1 homologue, putative	1.09347	1.16892	1.06803	0.734653	0.959065	0.969879	0.83347	1.15417	1.06307	1.09792	1.19387	1.15472	0.871031	0.906772	0.95603
aPFL1890c_1	aPFL1890c_1::PFL1890c::hypothetical protein, conserved	0.935746	0.813352	1.04316	1.38188	1.49137	0.924449	0.960219	1.24565	1.80266	1.80029	0.854629	0.825162	0.851366	1.01093	0.877625
aPF11_0205_0	aPF11_0205_0::PF11_0205::hypothetical protein	1.59183	1.53892	1.82847	1.70158	1.53267	1.52983	1.32894	1.71014	1.0645	1.39332	1.86453	1.46542	1.78486	1.8405	1.92471
aPF10_0079_1	aPF10_0079_1::PF10_0079::hypothetical protein	1.4964	1.22003	1.47115	1.44451	1.42101	1.38826	1.53507	1.63976	1.96797	2.00694	1.96499	1.78492	1.96994	1.96794	1.94873
aPF11_0237_0	aPF11_0237_0::PF11_0237::hypothetical protein	1.36916	1.58004	1.94234	1.82293	2.11392	1.06813	1.3904	1.29726	1.59461	1.53151	0.738504	0.988685	0.739161	0.671501	0.781517
aMAL13P1.188_1	aMAL13P1.188_1::MAL13P1.188::hypothetical protein	1.26445	1.66004	2.38866	2.60978	1.38277	1.2657	1.51587	2.92529	4.08413	3.48141	1.02816	1.05787	0.862933	0.879814	0.719552
aPF07_0018_0	aPF07_0018_0::PF07_0018::hypothetical protein	1.43145	1.61004	1.59419	1.10263	1.16403	1.31219	1.88843	1.94707	3.10229	2.64719	1.51485	1.69812	1.85427	2.03533	2.16877
aPF11_0129_0	aPF11_0129_0::PF11_0129::hypothetical protein	1.2777	1.25336	0.97117	0.848178	1.03707	1.4432	0.975583	1.00286	0.695414	0.826612	1.33479	1.62265	1.38	1.58072	1.5036
aPF14_0709_0	aPF14_0709_0::PF14_0709::ribosomal protein L20, putative	1.03515	0.778907	0.692384	0.767275	0.751038	1.03433	0.843712	0.877354	0.703964	0.680814	1.00076	0.783652	0.808566	0.802615	0.844746
aPF10_0381_0	aPF10_0381_0::PF10_0381::hypothetical protein	0.149772	0.165559			0.201908	0.156364	0.0729766	0.192361	0.183829	0.226938	0.0769818	0.138366	0	0	0.12393
aPFL2535w_1	aPFL2535w_1::PFL2535w::RESA-like protein, putative	3.07365	2.28672	1.73554	1.36491	1.3537	2.59374	2.75647	1.74767	1.61171	1.52898	1.93759	1.82391	1.79296	1.87236	2.02714
aPFL2240w_0	aPFL2240w_0::PFL2240w::hypothetical protein	1.34795	0.9678	0.654428	0.546748	0.578192	1.12624	1.11257	0.706106	0.49591	0.556569	1.85931	1.65787	1.24466	1.51088	1.51119
aPF14_0615_0	aPF14_0615_0::PF14_0615::ATP synthase (C/AC39) subunit, putative	1.09745	1.25781	1.82585	2.35532	2.63093	1.27204	1.37887	1.54475	1.75849	1.66083	1.19909	1.18743	1.36265	1.43245	1.47704
aPFF0920c_2	aPFF0920c_2::PFF0920c::hypothetical protein	1.71642	1.35781	1.1374	0.692896	0.806104	1.56258	1.66182	1.4345	1.21127	1.13089	1.57878	1.54215	1.1313	1.07955	1.13687
aMAL13P1.203_0	aMAL13P1.203_0::MAL13P1.203::hypothetical protein	0.501008	0.501123		0.23749	0.308981	0.403588	0.48267	0.410527	0.236555	0.385414	1.07644	1.28554	1.19955	1.26703	1.39358
aPF14_0284_1	aPF14_0284_1::PF14_0284::hypothetical protein	0.516913	0.79113	0.821961	0.802507	1.09979	0.526143	0.334156	0.669745	0.578562	0.734062	0.855934	0.967301	0.530947	0.726643	0.67782
aPFI1430w_1	aPFI1430w_1::PFI1430w::hypothetical protein	0.982135	1.01447	0.780078	0.674628	0.737272	1.0544	0.706721	0.708452	0.604212	0.547694	1.27085	1.05284	0.926554	0.912898	0.866244
aPF14_0712_4	aPF14_0712_4::PF14_0712::hypothetical protein	1.24324	2.24339	1.26959	1.254	1.54491	0	0.885962	1.38289	0.930544	1.44784	1.2304	1.35598	1.28168	1.38344	1.54786
aPF11_0439_1	aPF11_0439_1::PF11_0439::hypothetical protein	1.01925	0.831131	0.625633	0.600249	0.608784	0.735333	0.734888	0.707279	0.641263	0.579389	1.07122	1.06416	1.04686	1.00725	1.04329
aPF07_0081_1	aPF07_0081_1::PF07_0081::hypothetical protein	1.29361	1.92893	1.20415	0.977362	0.948358	1.43791	1.34943	1.49432	1.06735	0.992695	1.97021	1.71573	1.3291	1.79884	1.89941
aPF14_0682_0	aPF14_0682_0::PF14_0682::hypothetical protein	0.26906	0.653349	0.787931	0.566322	0.934591	0.408871	0.323914	0.619309	0.651238	1.08398	0.474939	0.33082	0.274149	0	0.450194
aPF13_0106_1	aPF13_0106_1::PF13_0106::hypothetical protein	0.654757	0.73335	0.734268	0.745092	0.695972	0.917053	0.887242	1.15065	1.14002	0.912823	1.09471	1.38366	1.59284	1.70694	1.70593
aPF10_0025_0	aPF10_0025_0::PF10_0025::PF70 protein	0.196162	0.178893	0.180622	0.167026	0.27533	0.189116	0.21893	0.200572	0.26648	0.281454	0.160488	0.206291	0.204744	0.199735	0.227626
aPF11_0481_1	aPF11_0481_1::PF11_0481::hypothetical protein	0.12724	0.103336	0.128268	0.135708	0.177435	0.0792385	0.135711	0.226376	0.277881	0.400628	0.163097	0.210064	0.19896	0.219341	0.188424
aPFL1520w_0	aPFL1520w_0::PFL1520w::dim1 protein homolog, putative	0.718377	0.725572	0.73165	1.43799	1.37512	0.768085	0.810425	0.727218	0	0.836755	0.473634	0.538368	0.567963	0.594303	0.699318
aPFF0800w_1	aPFF0800w_1::PFF0800w::hypothetical protein	0.351236	0.530012		0.313173	0.633258	0.384571	0.323914	0.429293	0.303531	0.536284	0.555835	0.577362	0.462699	0.427653	0.505836
aPF11_0507_4	aPF11_0507_4::PF11_0507::antigen 332, putative	1.0166	0.665571	0.657045	0.583285	0.558307	0.973048	0.993507	0.852722	0.517286	0.518534	1.02164	1.08428	1.05495	0.993773	0.920622
aPFI0755c_0	aPFI0755c_0::PFI0755c::6-phosphofructokinase, putative	0.813807	0.818908	0.646574	0.545444	0.513949	0.971992	0.844993	0.726046	0.604212	0.562908	1.00337	1.08806	1.22847	1.27928	1.28988
aPF14_0177_1	aPF14_0177_1::PF14_0177::DNA replication licensing factor MCM2	2.82844	2.84784	2.08501	1.45887	1.28334	2.68566	3.1764	2.13239	2.23872	1.78127	2.90574	3.13713	2.85254	2.70806	2.56079
aPF14_0648_2	aPF14_0648_2::PF14_0648::hypothetical protein	0.967556	0.857798	0.941067	1.24486	1.19157	1.07236	1.04728	1.18466	0.892068	0.943251	0.580626	0.547173	0.536731	0.457062	0.471692
aPFD0165w_1	aPFD0165w_1::PFD0165w::ubiquitin-specific protease, putative	1.96825	1.91338	2.0392	1.73681	2.01755	1.0544	2.13169	2.01041	1.99077	1.70394	1.52659	1.51447	1.43899	1.3381	1.49348
aPFC0865w_0	aPFC0865w_0::PFC0865w::RNA-binding protein, putative	0.668011	0.642237	0.479041	0.425394	0.455823	0.558895	0.581253	0.445715	0.324907	0.354987	0.801133	0.816357	0.571433	0.661698	0.574124
aPFF1140c_1	aPFF1140c_1::PFF1140c::ATP-dependent DEAD box helicase, putative	0.462571	0.562235	0.459408	0.460626	0.487945	0.748011	0.432739	0.491459	0.49021	0.536284	0.555835	0.626419	0	0.609007	0.557684
aPFE0440w_0	aPFE0440w_0::PFE0440w::hypothetical protein	2.16176	1.9756	2.17532	2.06694	1.67186	2.28629	3.34668	3.74987	4.36486	4.53242	3.26716	4.04153	3.63566	4.03636	4.40836
aMAL13P1.380_11	aMAL13P1.380_11::MAL13P1.380::chloroquine resistance marker protein, putative	1.17565	1.79226	3.9907	4.64801	3.83167	1.43791	2.04591	3.98211	5.56046	5.28423	0.538873	0.491827	0.513596	0.536711	0.531128
aPF14_0588_2	aPF14_0588_2::PF14_0588::hypothetical protein	1.48712	1.7256	2.09286	1.75508	2.65234	1.58688	1.55684	1.76292	2.25155	2.25036	1.22519	1.3824	1.44478	1.49372	1.73249
aMAL13P1.93_1	aMAL13P1.93_1::MAL13P1.93::hypothetical protein	0.412205	0.354453	0.30889	0.251844	0.321218	0.564178	0.444261	0.383549	0.346282	0.352451	0.399262	0.472959	0.404861	0.38354	0.443871
aPF14_0632_1	aPF14_0632_1::PF14_0632::26S proteasome subunit, putative	1.60906	1.4467	1.47115	1.19397	1.09826	1.31325	1.87947	1.99633	1.84969	1.7014	1.63097	1.92454	1.96647	1.63096	1.65535
aPF14_0738_0	aPF14_0738_0::PF14_0738::lysophospholipase, putative	1.31084	1.30892	1.10336	0.99563		1.5573	1.30718	1.2785	1.0246	0.878592	0.682398	0.716985	0.794685	1.1016	0.957295
aPF10_0260_1	aPF10_0260_1::PF10_0260::hypothetical protein	0.90261	0.787796	0.48035	0.409735	0.419113	0.749068	0.729766	0.563008	0.423234	0.417109	0.913344	0.865414	0.595725	0.758502	0.819454
aPF13_0254_3	aPF13_0254_3::PF13_0254::hypothetical protein	2.09284	1.4867	1.62167	1.00607	1.14568	1.37875	1.96653	0	1.48631	1.29951	1.69099	1.79749	1.69348	1.51946	0.564007
aMAL7P1.131_0	aMAL7P1.131_0::MAL7P1.131::hypothetical protein	0.699821	0.644459		0.946045	1.23134	0.739559	0.44042	0.546587	0.524411	0.736598	1.33087	1.30818	1.27936	1.24252	1.28609
aPFL0365c_0	aPFL0365c_0::PFL0365c::hypothetical protein	0.291592	0.515568	0.520924	0.40843	0.66538	0.351819	0.158756	0.33194	0.282156	0.494446	0.498425	0	0.247544	0.306342	0.335116
aPF14_0392_2	aPF14_0392_2::PF14_0392::Ser/Thr protein kinase, putative	2.29032	2.20672	2.00778	1.53455	1.62292	2.0528	3.22634	2.2145	2.28717	3.2494	1.00468	0.857867	0.651249	0.544063	0.589299
aPF10_0388_0	aPF10_0388_0::PF10_0388::hypothetical protein	0.473175	0.433343	0.320669	0.478894	0.39311	0.68462	0.682396	0.775309	0.51586	0.465286	0.320975	0.408807	0	0.211988	0.30856
aORF470_1	aORF470_1::ORF470::	2.20947	2.24561	2.44887	2.49625	2.27912	1.8003	1.27517	1.70427	1.59746	1.36543	0.574102	0.388682	0.292657	0.21689	0.218774
aPFI1075w_0	aPFI1075w_0::PFI1075w::hypothetical protein	0.881404	0.628904	0.471188	0.429308	0.466531	0.690959	0.627343	0.460963	0.26078	0.356255	1.00598	0.90315	0.757669	0.858982	0.84854
aPFF0330w_0	aPFF0330w_0::PFF0330w::coatomer alpha subunit, putative	1.72702	1.7056	1.45283	1.17701	1.25581	1.31325	2.08047	2.13474	1.97509	1.64055	1.87757	1.99498	2.16427	2.25713	2.0891
aPFD1060w_0	aPFD1060w_0::PFD1060w::u5 small nuclear ribonucleoprotein-specific protein, putative	0.874777	0.716683	0.784004	0.661579	0.676087	0.974105	1.00119	1.11898	0.634138	0.811398	1.02686	1.01887	1.29903	1.2462	1.25574
aPFL2080c_0	aPFL2080c_0::PFL2080c::hypothetical protein			0.175387		0.695972	0	0	0	0	0.311881	0.183974	0.116982	0	0	0
aPF11_0214_1	aPF11_0214_1::PF11_0214::hypothetical protein	1.05901	1.17336	1.26174	1.00215	1.09826	0.86951	0.843712	0.83982	0.990395	1.09158	1.1743	1.11825	1.07115	1.1543	1.2001
aPF13_0255_1	aPF13_0255_1::PF13_0255::hypothetical protein	1.54146	2.33561	6.01812	7.34522	6.84347	1.47067	2.02414	4.50641	8.64138	8.35106	1.57356	1.42391	1.36149	1.27561	1.04076
aMAL8P1.85_0	aMAL8P1.85_0::MAL8P1.85::hypothetical protein	1.5693	1.36114	1.19498	0.99824	0.755627	1.45587	1.30078	1.1049	1.2697	1.06116	1.31652	1.38491	1.87393	2.0819	1.75399
aPFA0700c_0	aPFA0700c_0::PFA0700c::hypothetical protein, conserved in P. falciparum	0.189535	0.174449			0.130017	0	0.0678555	0.207609	0.173854	0.148334	0.137002	0.178617	0	0	0.226362
aPFB0260w_0	aPFB0260w_0::PFB0260w::proteasome 26S regulatory subunit, putative	1.49375	1.65782	1.86119	1.51759	1.33994	2.03273	2.15729	2.10541	2.15607	1.96764	2.26118	2.44152	2.2464	2.30001	2.52159
aPFA0175w_0	aPFA0175w_0::PFA0175w::hypothetical protein	1.39567	1.41559	1.23425	1.06609	1.69022	1.17062	1.03704	0.728391	0.880668	1.20062	1.23823	1.57863	1.51071	1.42143	1.74387
aPFE1325w_1	aPFE1325w_1::PFE1325w::hypothetical protein	0.804529	1.10336	0.887404	0.794677	0.777041	1.2488	1.15738	1.21281	1.0816	1.13342	1.89062	2.26794	2.58186	2.84653	3.15895
aMAL13P1.178_1	aMAL13P1.178_1::MAL13P1.178::hypothetical protein	1.09347	1.05669	1.11122	0.565017	0.532304	1.07342	1.22012	0.97588	0.939094	0.872253	0.652389	0.349688	0.594568	0	0.718287
aPFA0555c_0	aPFA0555c_0::PFA0555c::UMP-CMP kinase, putative	2.33936	2.30339	3.77474	2.88641	3.28713	1.86791	2.07919	3.21266	3.85043	4.22434	1.78624	1.62139	1.11395	0.905546	0.980057
aMAL7P1.178_1	aMAL7P1.178_1::MAL7P1.178::hypothetical protein	0.567279	0.72335	1.11122	0.87819	1.1365	0.670886	0.883401	1.34301	1.16567	1.83959	0.588454	0.646545	0	0.599204	0.639883
aPF14_0086_0	aPF14_0086_0::PF14_0086::hypothetical protein	0.429436	0.380009	0.319361	0.332747	0.327336	0.398305	0.326474	0.293233	0.265055	0.261169	0.529739	0.548431	0.607292	0.654346	0.727139
aPF11_0438_0	aPF11_0438_0::PF11_0438::Ribosomal protein, putative	1.45929	1.17781	0.841594	0.653749	0.634788	1.22239	1.05624	0.812843	0.400433	0.564175	1.57617	1.46919	1.23194	1.01215	1.19883
aPF13_0210_2	aPF13_0210_2::PF13_0210::hypothetical protein	0.813807	0.662238	0.749974	0.588505	0.593488	0.959314	0.987105	0.884391	0.998945	0.773364	0.808962	0.794973	0.81088	0.849179	0.887742
aPFI1480w_1	aPFI1480w_1::PFI1480w::hypothetical protein	1.12793	0.892243	0.744739	1.26574	1.47913	0.804006	0.725926	0.554797	0.454584	0	1.35436	1.25158	1.0295	1.1016	1.07111
aPF14_0385_1	aPF14_0385_1::PF14_0385::hypothetical protein	0.767418	0.763351	0.713326	0.694201	0.806104	0.594817	0.581253	0.599369	0.537236	0.819005	0.87681	0.854093	0.775021	0.612684	0.601945
aPF07_0113_1	aPF07_0113_1::PF07_0113::hypothetical protein	1.22336	1.67782	1.23425	0.788153	0.773982	0.905432	0.78994	0.905504	0.74814	0.794917	1.62053	1.46668	1.31291	1.33933	1.30379
aPFA0110w_0	aPFA0110w_0::PFA0110w::ring-infected erythrocyte surface antigen precursor	0.0437388	0.0266673	0.0392656	0.257063	0.605725	0.0464866	0.0320073	0.0258045	0.0399008	0.046909	0.0365338	0.0238995	0.0173512	0.0159298	0.0164397
aMAL13P1.310_0	aMAL13P1.310_0::MAL13P1.310::cysteine protease, putative	1.29759	1.14892	1.42927	1.25139	1.23592	1.34494	1.84362	2.02683	2.43965	2.5914	0	1.27422	1.46213	1.61748	1.4214
aPFD0115c_0	aPFD0115c_0::PFD0115c::hypothetical protein	1.14384	0.942244	1.10075	1.14569	1.35676	1.03433	1.14714	0.974707	0.920569	1.03453	0.975973	0.871703	0.681324	0.71684	0.732198
aPF14_0572_0	aPF14_0572_0::PF14_0572::hypothetical protein	1.52423	2.10338	4.03651	4.31788	4.21866	1.33543	1.50818	2.69188	3.70793	4.42973	0.657608	0.557236	0.466169	0.389667	0.379377
aPF11_0154_0	aPF11_0154_0::PF11_0154::hypothetical protein	1.56797	1.54004	1.53136	0.908203	1.14721	1.86158	1.46337	1.34184	1.2811	1.07257	1.51746	1.93334	1.89359	2.2461	2.43686
aPF11_0134_1	aPF11_0134_1::PF11_0134::hypothetical protein	0.270385	0.27334	0.242138	0.203563	0.227912	0.302163	0.17668	0.161865	0	0.283989	0.224422	0.2478	0.18508	0.183805	0.232685
aun4tRNAThr1_0	aun4tRNAThr1_0::un-4-tRNA-Thr-1::	0.318101	0.30334	0.460717	0.397991	0.281448	0.0855776	0.0742569	0.110256	0.116852	0.181297	0.724151	1.55221	3.74555	3.06587	3.97587
aPF14_0430_0	aPF14_0430_0::PF14_0430::hypothetical protein	0.752838	0.798907	0.387421	0.370588	0.425231	0.908601	0.386648	0.540722	0.343432	0.401896	1.32435	1.15724	0.958943	1.02808	0.886478
aPFL0945w_0	aPFL0945w_0::PFL0945w::VAR fragment, pseudogene	0.218694	0.262228	0.346847	0.511516	0.42982	0	0	0.238105	0.200929	0.425984	0.26487	0.15346	0	0.180129	0.264299
aPF11_0085_0	aPF11_0085_0::PF11_0085::hypothetical protein	1.12263	0.76224	0.687149	0.498468	0.536893	0.961427	0.842432	0.735429	0.588537	0.670671	1.51615	1.33083	1.02025	0.970491	0.996497
aPF14_0605_0	aPF14_0605_0::PF14_0605::cyclin, putative	0.841641	0.79113	0.712017	0.41626	0.457353	0.91811	0.693918	0.842166	0.644113	0.575586	0.923782	1.25661	1.45519	1.56724	1.51498
aPFA0125c_2	aPFA0125c_2::PFA0125c::Ebl-1 like protein, putative	0.0331355	0.0400009	0.272242	2.11001	3.21677	0.0401475	0.0384088	0.11612	0.277881	0.34738	0	0.0251574	0.0277619	0.0379864	0.0442606
aPF14_0084_3	aPF14_0084_3::PF14_0084::hypothetical protein	2.27707	1.77671	1.57586	1.19528	1.2038	1.84467	1.95373	2.03621	1.71288	1.78381	2.02762	1.80001	1.78717	1.79149	1.95759
aPF14_0387_1	aPF14_0387_1::PF14_0387::hypothetical protein	1.67003	1.8256	1.38084	1.00607	1.09061	1.69042	1.48898	1.27029	1.23835	1.12074	1.88149	2.17234	2.0567	1.82335	2.11566
aPFA0210c_0	aPFA0210c_0::PFA0210c::hypothetical protein	1.02853	0.987801	1.71984	3.09259	4.32726	1.11145	1.19195	1.3219	1.83116	1.74324	0.806352	0.886798	0.842112	0.847954	0.90924
aPFE1173c_0	aPFE1173c_0::PFE1173c::	1.16504	1.19114	0.878242	0.872971	0.841285	1.60062	0.979423	0.882046	0.833642	0.886199	0.802438	0.796231	0.9173	0.997449	1.02938
aPFE1070c_0	aPFE1070c_0::PFE1070c::hypothetical protein	0.693194	0.594458	0.498674	0.377113	0.487945	0.633908	0.709282	0.502015	0.434634	0.499517	0.741113	0.930823	0.736848	0.675177	0.730933
aPFD0330w_1	aPFD0330w_1::PFD0330w::hypothetical protein	0.542096	0.511123	0.577205	0.565017	0.419113	0.743785	0.640146	0.856241	0.629863	0.552765	0.558445	0.528305	0.798155	0.621261	0.684143
aPFD0855c_0	aPFD0855c_0::PFD0855c::hypothetical protein	0.67994	1.22003	0.976406	1.27749	1.69634	0.789215	0.65807	1.13071	1.58463	2.31502	1.99761	1.46039	1.48411	1.69713	1.64903
aPF13_0313_0	aPF13_0313_0::PF13_0313::zinc finger protein	0.575232	0.553346	0.599456	0.64853	0.529245	0.428944	0.446822	0.445715	0.518711	0.65419	0.733285	0.773589	0.780804	0.879814	0.924415
aMAL13P1.310_3	aMAL13P1.310_3::MAL13P1.310::cysteine protease, putative	1.15444	1.64893	1.46461	1.59849	1.52655	1.68514	1.83466	2.1019	2.42825	2.7017	1.18082	1.12076	1.1822	1.23762	1.1963
aPFB0180w_1	aPFB0180w_1::PFB0180w::5'-3' exonuclease, N-terminal resolvase-like domain, putative	0.951651	1.35003	1.06933	0.949959		1.41361	1.00887	0.993474	0.943369	0.702367	0.559749	1.33208	1.0538	1.37609	1.51498
aPF14_0282_1	aPF14_0282_1::PF14_0282::hypothetical protein, conserved	0.780672	0.691127	0.565425	0.447577	0.478768	0.780763	0.517238	0.597023	0.428934	0.408235	1.18082	1.03523	0.969354	1.02563	0.990174
aPFE1430c_0	aPFE1430c_0::PFE1430c::cyclophilin, putative	0.878753	0.692238	0.634795	0.47498	0.497123	0.808232	0.731047	0.551279	0.535811	0.465286	0.854629	0.977364	0.894165	0.871236	1.03696
aMAL13P1.122_2	aMAL13P1.122_2::MAL13P1.122::hypothetical protein	0.429436	0.386676	0.277477	0.360149	0.442057	0.399362	0.313672	0.356572	0.262205	0.257365	0.404481	0.413839	0.322732	0.346779	0.316148
aPF13_0237_0	aPF13_0237_0::PF13_0237::hypothetical protein	3.63828	3.00229	2.54834	1.56065	1.55408	3.01106	3.3979	2.86078	2.86003	2.93498	4.00567	4.63147	4.25336	4.17973	3.93287
aPF13_0076_0	aPF13_0076_0::PF13_0076::hypothetical protein	0.355212	0.330008	0.289257	0.281856	0.290626	0.431057	0.435299	0.355399	0.317781	0.285257	0.365338	0.363524	0.38404	0.389667	0.413521
aPFE1095w_0	aPFE1095w_0::PFE1095w::hypothetical protein	4.52896	6.03236	9.28764	6.66276	6.09549	2.6529	3.57458	0	4.7311	4.64145	7.16584	8.75099	6.77275	8.07884	6.5999
aPF14_0525_0	aPF14_0525_0::PF14_0525::hypothetical protein	0.93177	0.852242	0.768298	0.840349	1.11356	0.965653	0.905166	0.937173	0.835067	0.835487	0.882029	0.929565	0.987862	0.953336	0.992703
aPF11_0477_0	aPF11_0477_0::PF11_0477::CCAAT-box DNA binding protein subunit B	1.39699	1.4267	1.3455	2.00039		1.76966	2.00622	2.01275	2.86858	3.12262	0.837667	0.757237	0.614233	0.60043	0.665174
aPFB0405w_0	aPFB0405w_0::PFB0405w::transmission-blocking target antigen s230 precursor	1.10938	1.2367	1.42011	1.58805	1.56326	1.31008	0.998628	1.42746	1.43358	1.45925	0.913344	1.18114	1.12204	1.13714	1.08249
aPF13_0326_0	aPF13_0326_0::PF13_0326::actin-depolymerizing factor, putative	0.546073	0.671127	1.68842	2.84727	3.39726	0.320123	0.719524	0.948903	1.66728	1.91313	0.237469	0.211322	0.167728	0.151946	0.17072
aPFL2395c_0	aPFL2395c_0::PFL2395c::dimethyladenosine transferase, putative	1.39434	1.14225	0.829814	0.527175	0.58584	1.09455	1.08313	0.695549	0.49306	0.652922	2.01327	2.05662	1.69001	1.77311	1.77422
aPF10_0159_0	aPF10_0159_0::PF10_0159::glycophorin-binding protein 130 precursor	2.67072	1.93116	1.05886	0.849483	0.760216	2.70467	2.20082	1.42863	1.00892	0.944518	2.46733	2.66039	2.6663	2.99725	2.70243
aPF14_0626_7	aPF14_0626_7::PF14_0626::dynein beta chain, putative	0.243877	0.274451	0.147901		0.168257	0.364497	0.160036	0.313173	0.189529	0.161012	0.191802	0.269184	0	0.126213	0.177043
aPF13_0234_0	aPF13_0234_0::PF13_0234::phosphoenolpyruvate carboxykinase	0.889356	0.792241	0.535322	0.600249	0.621021	0.798724	0.724645	0.611098	0.588537	0.552765	1.53572	1.8302	1.97804	2.09293	2.1283
aPF00_0003_3	aPF00_0003_3::PF00_0003::hypothetical protein	3.24595	2.52895	3.42396	2.52235	2.60034	2.59268	3.1764	3.26427	3.8946	3.90105	2.52344	2.64907	2.85948	2.89309	2.91994
aPF14_0604_0	aPF14_0604_0::PF14_0604::hypothetical protein	0.447992	0.558902	0.545793	0.602859	0.572074	0.475431	0.273982	0.482075	0.560036	0.510927	0.589759	0.441512	0.539044	0.555091	0.547567
aPF11_0305_1	aPF11_0305_1::PF11_0305::hypothetical protein	0.585835	0.387787	0.325905	0.266197	0.247797	0.549387	0.495473	0.374166	0.294981	0.304274	0.498425	0.576104	0.565649	0.642092	0.64747
aPFE0765w_3	aPFE0765w_3::PFE0765w::phosphatidylinositol 3-kinase, putative	0.747536	1.06002	1.16619	1.15352	1.16709	1.22239	0.939734	1.28553	1.18705	1.02693	1.11037	1.24781	1.26085	1.25355	1.25447
aPF14_0174_1	aPF14_0174_1::PF14_0174::hypothetical protein, conserved	0.661384	0.475567	0.43454	0.403211	0.360988	0.510296	0.477549	0.424602	0.393308	0.361326	0.564968	0.615098	0.632741	0.725417	0.66391
aPF14_0073_3	aPF14_0073_3::PF14_0073::hypothetical protein	0.824411	0.830019	0.64003	0.46454	0.573603	0.43317	0.405853	0.638076	0.618463	0	0.401871	0.665413	0.645465	0.617585	0.651264
aPF14_0609_1	aPF14_0609_1::PF14_0609::hypothetical protein	1.06034	0.841131	0.612544	0.579371	0.708209	0.849436	0.646547	0.543068	0.428934	0.545158	1.19518	1.04026	0.975138	1.05872	0.887742
aMAL13P1.145_2	aMAL13P1.145_2::MAL13P1.145::hypothetical protein	0.811156	0.681127	0.975097	0.913422	0.807634	0.719485	0.608139	0.876181	1.0873	0.940715	0.682398	0.747174	0.793528	0.768305	0.767606
aPFC0425w_2	aPFC0425w_2::PFC0425w::hypothetical protein	0.880078	0.574458	0.472497	0.488029	0.640906	0.743785	0.74513	0.574737	0.508735	0.432323	0.975973	0	0.946219	0.9178	1.01547
aPFL1620w_7	aPFL1620w_7::PFL1620w::asparagine/aspartate rich protein, putative	1.12793	0.977801	0.93714	0.912117	0.688324	1.25302	1.00119	1.14478	0.874968	0.819005	0.841581	0.974848	1.25044	1.20944	1.41128
aPFF1105c_1	aPFF1105c_1::PFF1105c::chorismate synthase	1.24457	1.28892	0.900492	0.811641	0.66385	1.34177	1.384	1.12719	1.06022	0.906484	1.3387	1.48177	0	1.60401	1.57568
aMAL13P1.38_1	aMAL13P1.38_1::MAL13P1.38::hypothetical protein	1.8874	2.1156	3.57317	3.7359	3.58846	1.86897	2.33141	3.82493	6.3884	4.9901	2.07981	2.01133	1.98729	1.89074	1.65661
aPFF0860c_0	aPFF0860c_0::PFF0860c::histone h2a	1.82245	1.05669	1.42665	1.39754	1.70857	1.58054	2.27508	2.21802	2.37837	3.28997	1.04904	1.03648	1.02141	1.29889	1.36449
aPF13_0098_0	aPF13_0098_0::PF13_0098::hypothetical protein	1.34265	1.27225	0.942376	0.856007	0.683735	1.34494	1.34943	1.00638	0.793741	0.832951	1.33479	1.50944	1.11973	1.19351	1.07996
aMAL13P1.485_1	aMAL13P1.485_1::MAL13P1.485::acyl-coa ligase antigen	1.93114	3.23896	2.4541	1.41058	1.56173	1.32381	1.95373	1.44036	1.4179	1.75338	2.42689	1.66668	1.12551	1.43858	1.20515
aMAL8P1.335_1	aMAL8P1.335_1::MAL8P1.335::	0.344609		0.675369	0.515431		0.226094	0.151074	0.229895	0.416108	0.314417	0	0.191196	0	0	0.33891
aPFE0430w_2	aPFE0430w_2::PFE0430w::ATP-dependent RNA helicase, putative	1.25517	0.928911	0.766989	0.593725	0.685265	1.04278	0.967901	0.970016	0.879243	1.03073	1.80973	1.66668	1.76288	2.07455	1.91459
aPF14_0112_2	aPF14_0112_2::PF14_0112::POM1, putative	1.91258	1.35114	1.27744	1.05566	0.93918	1.80558	1.64389	1.19874	1.09442	0.87986	1.6375	1.81385	1.49914	1.23885	1.58074
aPF13_0269_0	aPF13_0269_0::PF13_0269::glycerol kinase, putative	0.49173	0.726684	1.02745	1.02825	0.810693	0.550443	0.473708	0.648632	0.749565	0	0.542787	0	0.703302	0.969265	0.808073
aMAL13P1.314_0	aMAL13P1.314_0::MAL13P1.314::hypothetical protein	2.07826	2.02449	2.83236	2.91904	2.3143	1.96089	2.25972	3.18803	3.4671	3.24052	1.54486	1.34592	1.22847	1.25233	1.29494
aPFB1030w_0	aPFB1030w_0::PFB1030w::hypothetical protein		0.314452				0.276806	0	0	0	0	0	0.123271	0	0	0
aMAL8P1.18_1	aMAL8P1.18_1::MAL8P1.18::hypothetical protein	2.38178	1.8456	1.28922	0.943435	0.930002	1.78656	1.79625	1.33714	0.919144	0.869718	2.61347	2.26416	1.77908	1.80742	1.72237
aPFL1205c_0	aPFL1205c_0::PFL1205c::hypothetical protein	0.504985	0.444455	0.465952	0.331442	0.362517	0.381401	0.26374	0.270948	0.313506	0.327095	0	0.432707	0.404861	0.485245	0.52354
aPF11_0289_1	aPF11_0289_1::PF11_0289::hypothetical protein	1.4288	1.17336	1.07064	0.751616	0.657732	0.715259	1.33406	1.08379	0.806566	0.726455	1.24476	1.32454	1.23078	1.39447	1.20389
aMAL8P1.40_0	aMAL8P1.40_0::MAL8P1.40::RNA-binding protein, putative	0.718377	0.80113	0.363862	0.519346	0.443587	0.777594	0.802743	0.687339	0.582837	0.49191	0.598893	0.716985	0.662816	0.665374	0.743579
aPFL1330c_1	aPFL1330c_1::PFL1330c::hypothetical protein	1.07889	1.70337	2.02087	1.74464	1.83247	1.24352	2.14193	1.63038	1.4635	1.07384	3.17452	2.48303	3.32912	3.19821	2.85797
aPFF0225w_2	aPFF0225w_2::PFF0225w::DNA helicase, putative	0.722353	0.531123		0.491943	0.487945	0.603269	0.549245	0.469173	0.505885	0.466554	0.520606	0.669186	0.517066	0.575922	1.06478
aPFL2350c_0	aPFL2350c_0::PFL2350c::hypothetical protein	0.516913	0.610014	0.554955	0.433223	0.578192	0.458527	0.363603	0.441023	0.471685	0.551497	0.660217	0.666671	0.630427	0.595528	0.641147
aPFF1080w_0	aPFF1080w_0::PFF1080w::hypothetical protein, conserved	1.19685	0.9678	0.862535	0.772494	0.804574	0.0676168	1.22396	0.858587	0.641263	0.679546	0.875505	0.864156	0.90689	0.844278	0.857392
aMAL8P1.34_0	aMAL8P1.34_0::MAL8P1.34::hypothetical protein	1.11203	0.998912	0.807564	0.682457	0.602666	1.26676	0.882121	1.02749	0.691139	0.657993	1.5018	1.39246	1.3638	1.30257	1.39358
aPFF1400w_2	aPFF1400w_2::PFF1400w::hypothetical protein	0.674638	0.720017	0.643957	0.566322	0.536893	0.753294	0.661911	0.624	0.585687	0.536284	0.905515	0.884282	0.757669	0.615134	0.733462
aPF11_0471_0	aPF11_0471_0::PF11_0471::hypothetical protein	0.429436	0.417787	0.413598	0.35232	0.379343	0.403588	0.458345	0.466827	0.350557	0.446269	0.426662	0.48428	0.488147	0.397019	0.538715
aMAL13P1.123_0	aMAL13P1.123_0::MAL13P1.123::hypothetical protein	2.08488	1.95671	2.07846	1.81641	1.44701	2.34863	2.61692	2.54057	2.99114	2.24022	0	2.20253	2.3829	2.16032	2.46469
aPFL0370w_0	aPFL0370w_0::PFL0370w::hypothetical protein	0.296894		0.450246	0.326222	1.25122	0	0.197165	0.315519	0	0	0.304013	0.389939	0.235976	0	0.412256
aPFD0380c_1	aPFD0380c_1::PFD0380c::hypothetical protein	1.89933	2.33339	3.48941	3.83898	5.11807	1.4432	1.50434	2.55934	3.50557	4.46396	2.03545	1.73712	1.41007	1.39692	1.16342
aPFE1045c_1	aPFE1045c_1::PFE1045c::hypothetical protein	1.70847	1.22336	1.04708	0.779019	0.82293	1.61013	1.41344	1.15417	0.97472	0.902681	1.62836	1.75095	1.67844	1.69223	1.74008
aPFI1070c_1	aPFI1070c_1::PFI1070c::hypothetical protein	0.640177	0.490011	0.37695	0.356235	0.409935	0.602212	0.487791	0.354226	0.346282	0.289061	0.72937	0.711954	0.565649	0.610233	0.619649
aPFD0940w_0	aPFD0940w_0::PFD0940w::hypothetical protein	3.77744	4.91456	3.72631	3.42664	2.57892	4.47116	4.51815	3.82024	3.85328	2.48618	2.2677	1.87422	1.88203	1.71919	1.77675
aPFA0270c_0	aPFA0270c_0::PFA0270c::hypothetical protein	1.24987	0.871131	0.900492	0.734653	0.74492	1.19175	0.761774	0.828091	0.621313	0.739133	1.35827	1.1107	1.03645	0.996223	1.01294
aPF14_0416_1	aPF14_0416_1::PF14_0416::hypothetical protein	1.34397	1.4967	0.883477	0.660274	0.789278	0.852606	1.13178	0.951249	0.708239	0.952125	1.61401	1.82139	1.57433	1.36138	1.6819
aPFL0420w_1	aPFL0420w_1::PFL0420w::hypothetical protein	2.30623	2.44006	2.38081	1.53977	1.19462	2.19649	2.2866	2.04442	1.74139	1.87002	2.78178	3.08681	2.57723	2.71051	2.68599
aPF13_0135_1	aPF13_0135_1::PF13_0135::hypothetical protein	1.28831	0.975578	0.772224	0.747701	0.668439	1.05123	0.901326	0.814016	0.692564	0.650387	0.871591	1.16856	1.16947	1.18003	1.12169
aPFI0260c_3	aPFI0260c_3::PFI0260c::hypothetical protein	0.48908	0.571124	0.645266	0.729433	0.876466	0.521917	0.446822	0.5677	0.820817	0.631369	0.915953	1.18114	1.53153	1.57827	1.52762
aPF10_0254_0	aPF10_0254_0::PF10_0254::hypothetical protein	2.23598	2.61117	3.17136	2.88641	3.77507	1.99364	3.26987	5.26647	7.67093	8.25091	2.16071	2.52454	2.42454	2.02798	2.09416
aPF07_0126_1	aPF07_0126_1::PF07_0126::hypothetical protein	0.19086	0.201116	0.232976	0.527175	0.85964	0.223981	0.248377	0.279158	0.276456	0.262437	0.178754	0.173586	0.179296	0.176453	0.187159
aPF11_0213_3	aPF11_0213_3::PF11_0213::hypothetical protein	0.571256	0.560013	0.413598	0.396686	0.338044	0.692016	0.404572	0.471519	0.390458	0.346112	0.743723	0.720759	0.61886	0.615134	0.620914
aPFL0465c_0	aPFL0465c_0::PFL0465c::Zinc finger transcription factor (krox1)	1.116	1.24336	1.7879	2.06955	1.92425	1.15371	1.09337	1.87317	2.41827	2.63958	2.05372	2.58869	2.40488	2.81957	2.59367
aPFE0860c_1	aPFE0860c_1::PFE0860c::hypothetical protein	0.591137	0.540013	0.278786	0.369284	0.400758	0.574743	0.494193	0.673264	0.418959	0.351183	0.624988	0.748432	0.676697	0.559993	0.699318
aPF07_0055_1	aPF07_0055_1::PF07_0055::hypothetical protein	0.238575	0.317785	0.409672	0.35232	0.573603	0.23032	0.145953	0.347188	0.327757	0.608549	0.383604	0.379876	0.318105	0.360258	0.36926
aPFB0920w_0	aPFB0920w_0::PFB0920w::hypothetical protein	0.5527	0.465566	0.427996	0.371893	0.416054	0.559952	0.631184	0.566527	0.547211	0.546426	0.613245	0	0.820134	0.754826	0.799221
aPFL2425w_0	aPFL2425w_0::PFL2425w::adaptor-related protein complex 3, sigma 2 subunit, putative	1.80787	1.36225	1.02352	1.28793	1.03402	1.60907	1.70535	1.27263	0.882093	0.886199	1.10645	1.02013	0.845582	0.78546	0.819454
aPFF0120w_0	aPFF0120w_0::PFF0120w::putative geranylgeranyltransferase	0.715726	0.564458	0.552337	0.454101	0.411465	0.77865	0.626063	0.636903	0.446034	0.386682	0.8194	0.768558	0.777334	0.971716	0.814396
aPFE1045c_0	aPFE1045c_0::PFE1045c::hypothetical protein	1.82113	1.54448	1.15441	0.805116	0.839755	0	1.63109	1.37702	1.15855	1.07003	1.94542	1.90316	1.89591	1.60033	2.05243
aPFC1120c_3	aPFC1120c_3::PFC1120c::var (3D7-varT3-2)	0.290267	0.325563		0.22966	0.223323	0.484939	0.298308	0.486767	0.179554	0.247223	0.268784	0.36604	0.203587	0	0.227626
aPFF0770c_1	aPFF0770c_1::PFF0770c::hypothetica protein with PP2C domain	0.504985	0.511123	1.24603	3.45665	4.35939	0.899093	0.463466	0.870316	1.37658	1.30077	0.531044	0.644029	0.76461	0.85163	0.786575
aPFF0385c_0	aPFF0385c_0::PFF0385c::hypothetical protein	0.508961	0.561124	0.649192	0.658969	1.17474	0.741672	0.385368	0.526647	0.360532	0.52107	0.935525	0.781137	0.684794	0.769531	0.610797
aPFC0640w_0	aPFC0640w_0::PFC0640w::CTRP protein	0.112661	0.17556	0.227741		0.284507	0.133121	0	0	0.196654	0.251026	0.26487	0.270442	0	0	0
aPFL1335w_1	aPFL1335w_1::PFL1335w::hypothetical protein	2.77278	2.78673	2.69101	1.9482	2.50244	2.34757	1.89739	3.13994	3.36307	3.49028	2.39818	2.2541	2.03934	2.17135	1.89436
aPFB0370c_0	aPFB0370c_0::PFB0370c::RNA-binding protein, putative	0.522215	0.424454	0.416216	0.425394	0.364047	0.582139	0.490352	0.490286	0.471685	0.450073	0.579321	0.55472	0.655876	0.688656	0.69426
aMAL8P1.105_0	aMAL8P1.105_0::MAL8P1.105::hypothetical protein	1.56532	1.47226	0.984259	0.777714	0.668439	1.46221	1.23804	0.958286	0.755265	0.756883	1.16517	1.45158	1.17641	1.26335	1.25574
aPFA0350c_0	aPFA0350c_0::PFA0350c::hypothetical protein	0.914539	0.977801	0.744739	0.484114	0.584311	0.612778	0.725926	0.636903	0.417534	0.548962	1.07905	1.10315	0.991332	1.05627	1.27977
aPFD0975w_1	aPFD0975w_1::PFD0975w::unknown	0.69717	0.515568	0.532704	0.439748	0.517008	0.64236	0.733607	0.640421	0.649813	0.650387	1.2278	1.34969	1.54773	1.50843	1.4391
aPFL1425w_0	aPFL1425w_0::PFL1425w::t-complex protein 1, gamma subunit, putative	0.766092	0.717795	0.489512	0.344491	0.440527	0.723711	0.674714	0	0.330607	0.398092	0.794609	0.779879	0.661659	0.642092	0.674026
aPF10_0286_0	aPF10_0286_0::PF10_0286::hypothetical protein	0.455944	0.335563	0.210726	0.210087	0.229441	0.396192	0.314952	0.279158	0.200929	0.210456	0.608026	0.63774	0.67554	0.66905	0.760019
aPF14_0650_0	aPF14_0650_0::PF14_0650::hypothetical protein	1.92716	1.55893	1.45283	1.01259		1.60379	2.50937	2.38575	2.10049	2.954	1.03991	1.17988	1.28515	1.36506	1.52383
aPFA0620c_1	aPFA0620c_1::PFA0620c::glutamic acid-rich protein (garp)	3.16643	2.78451	1.50911	1.17179	1.54338	2.58212	2.52346	1.88256	1.15712	1.49982	3.21628	3.67172	3.3777	3.21659	3.25505
aPF14_0217_0	aPF14_0217_0::PF14_0217::hypothetical protein	1.41555	1.14225	0.925361	0.52587	0.784689	1.40199	1.47106	1.13775	0.837917	1.21583	1.79537	2.42643	2.29267	2.01328	2.26741
aPFI0260c_0	aPFI0260c_0::PFI0260c::hypothetical protein	0.770068	0.883354	0.990803	0.717689	1.21604	0.901206	0.756653	1.02397	1.1614	1.39966	2.32642	2.32706	2.52634	2.39437	2.6392
aPF11_0094_0	aPF11_0094_0::PF11_0094::hypothetical protein	0.349911	0.611125	1.97114	2.62805	2.79918	0.398305	0.344399	1.21281	2.15892	2.78665	0.41231	0.402518	0.528633	0.513429	0.471692
aPF11_0127_0	aPF11_0127_0::PF11_0127::hypothetical protein	1.65942	1.87227	2.65174	2.53931	2.61716	1.90067	2.47608	3.10593	4.44467	3.9226	1.78102	2.31574	2.79123	2.77423	2.99708
aPFI0690c_1	aPFI0690c_1::PFI0690c::hypothetical protein	0.41088	0.526679	2.19757	3.00255	4.27985	0.311671	0.487791	0.954767	1.66443	2.60535	0.247908	0.293083	0.219782	0.204636	0.227626
aPF08_0018_0	aPF08_0018_0::PF08_0018::Translation initiation factor like protein	1.16902	1.0378	0.893948	0.674628	0.656202	1.11356	0.846273	0.930136	0.884943	0.791113	1.44178	1.56605	1.58937	1.74125	1.71605
aPFL0415w_0	aPFL0415w_0::PFL0415w::acyl carrier protein, mitochondrial precursor, putative	0.96623	1.18558	0.769607	0.634176	0.567485	1.05229	1.17787	0.708452	0.648388	0.604745	1.24998	1.27925	1.13246	1.12734	1.22792
aPF11_0395_6	aPF11_0395_6::PF11_0395::guanylyl cyclase	3.35066	3.47008	4.17394	3.66152	2.89096	3.42733	3.81783	4.61315	5.02893	3.59804	2.19855	1.90819	2.58764	2.65047	2.62276
aMAL13P1.170_0	aMAL13P1.170_0::MAL13P1.170::hypothetical protein	0.703798	0.580014	0.5026	0.488029	0.455823	0.688846	0.542844	0.541895	0.555761	0.531212	1.23562	1.25284	1.45287	1.55989	1.48463
aPFD1060w_4	aPFD1060w_4::PFD1060w::u5 small nuclear ribonucleoprotein-specific protein, putative	0.864173	0.9478	0.947611	0.70464	0.715857	1.31219	1.02167	1.08731	0.890643	0.709974	1.17169	1.27548	1.19029	1.12121	1.18492
aMAL13P1.1_2	aMAL13P1.1_2::MAL13P1.1::	0.15905	0.44001	0.290566		0.174375	0.383514	0.171559	0.48794	0.126828	0.209189	0.14744	0.242769	0.34124	0.186256	0.222568
aMAL7P1.167_0	aMAL7P1.167_0::MAL7P1.167::hypothetical protein	1.83703	2.07672	2.43185	2.61761	2.95979	1.72317	2.6246	2.94054	3.16214	3.37618	1.85278	1.98618	2.11685	2.164	2.67714
aPFC0600w_0	aPFC0600w_0::PFC0600w::hypothetical protein	1.10938	0.790018	0.729032	0.59242	0.657732	1.15899	0.844993	0.901985	0.738165	0.70617	1.32957	1.42517	1.65068	1.59175	1.56556
aPFI1055w_0	aPFI1055w_0::PFI1055w::hypothetical protein	0.580534	0.4589	0.541866	0.227051	0.261563	0.619117	0.473708	0.431639	0.286431	0.328363	0.309232	0.44277	0.558709	0.544063	0.733462
aPFD0735c_1	aPFD0735c_1::PFD0735c::hypothetical protein	2.72109	1.86004	1.67272	1.2553	1.07226	2.18804	2.13041	1.94238	1.50198	1.37431	2.07329	2.43901	3.63913	4.15767	3.86459
aPFD0255w_1	aPFD0255w_1::PFD0255w::Plasmodium yoelii blood stage membrane protein ag-1	1.4076	1.31781	1.48686	1.59849	2.04815	1.30691	1.26749	2.01744	2.69758	3.79709	1.37002	1.26416	0.770394	0.974167	0.997761
aPFL2405c_4	aPFL2405c_4::PFL2405c::PFG377 protein	0.441365	0.663349	0.787931	0.698116	1.28181	0.489166	0.329035	0.500842	0.525836	0.807595	0.506253	0.552205	0.403705	0.366385	0.429961
aPFF0365c_1	aPFF0365c_1::PFF0365c::conserved hypothetical protein, EXS family	0.522215	0.687794	0.367788	0.366674	0.457353	0.603269	0.316232	0.24397	0.364807	0.46909	0.657608	0.503148	0.181609	0.318595	0.268093
aPF10_0064_0	aPF10_0064_0::PF10_0064::hypothetical protein	0.998041	1.20225	0.925361	0.882105	0.731153	1.26465	0.998628	0.8797	0.711089	0.578121	1.21997	1.34466	1.16484	1.38099	1.12043
aPFF1325c_0	aPFF1325c_0::PFF1325c::c3h4-type ring finger protein, putative	2.18562	2.16672	2.26955	1.87643	1.94107	1.95032	2.14705	2.18752	2.4026	2.5914	1.75101	2.02517	1.64836	1.68488	1.71225
aPF14_0140_0	aPF14_0140_0::PF14_0140::hypothetical protein	0.873451	0.726684	1.04185	1.60762	2.17357	0.96037	1.10873	1.45326	2.31567	1.89538	1.0647	1.29938	1.22152	1.21924	1.13813
aPF14_0450_1	aPF14_0450_1::PF14_0450::hypothetical protein	1.51098	1.23558	0.880859	0.786848	0.786219	1.29	1.29309	1.16941	0.849317	0	2.09808	2.26165	1.81841	1.92873	1.62626
aPFF0520w_1	aPFF0520w_1::PFF0520w::calcium-dependent protein kinase	1.67135	1.58448	1.73423	1.38971	1.11814	1.48229	1.59908	2.13708	1.32528	2.04498	1.36871	2.13209	2.30424	2.49117	2.17509
aPF10_0104_0	aPF10_0104_0::PF10_0104::hypothetical protein	1.46326	1.30892	0.993421	0.713774	0.718916	1.52455	1.61445	1.11898	1.05167	0.967339	1.29695	1.33586	1.07462	1.01583	1.09008
aPF13_0088_0	aPF13_0088_0::PF13_0088::Myb1 protein	1.73895	1.37448	0.655736	0.780324	0.699031	1.06497	1.23292	1.03218	0.826517	1.20569	1.06861	1.48932	1.60788	1.63341	1.71352
aPF13_0013_1	aPF13_0013_1::PF13_0013::PBS lyase HEAT-like repeat domain protein	0.846943	0.595569	0.534013	0.511516	0.650084	0.665603	0.564609	0.500842	0.397583	0.356255	1.09079	1.18617	0.95316	0.960688	0.916828
aPFD0980w_1	aPFD0980w_1::PFD0980w::holo-(acyl-carrier protein) synthase, putative	0.82176	0.785574	0.531395	0.538919	0.54607	0.94241	0.368724	0.633384	0.463134	0.46909	1.65315	1.55347	1.7837	2.14317	1.77169
aPF13_0188_0	aPF13_0188_0::PF13_0188::hypothetical protein	1.60906	1.76226	1.63738	1.00868	1.11967	2.26728	2.15345	1.78286	1.66871	1.66463	1.79798	1.63271	1.63448	1.69468	1.61235
aPF11_0507_3	aPF11_0507_3::PF11_0507::antigen 332, putative	0.929119	0.795574	0.701546	0.473675	0.492534	0.653982	0.839872	0.592331	0.488785	0.424716	0.925087	1.1346	1.08734	1.0146	0.980057
aPF14_0564_1	aPF14_0564_1::PF14_0564::hypothetical protein, conserved	0.471849	0.467789	0.633486	0.498468	0.380873	0.404644	0.225331	0.593504	0.337732	0.30681	0.739809	0.80252	1.05727	1.1739	1.11031
aMAL13P1.96_0	aMAL13P1.96_0::MAL13P1.96::chromosome segregation protein, putative	2.27574	2.11449	1.82585	1.33099	1.25428	1.59533	2.1176	2.17344	1.80409	2.1426	2.20768	3.30694	2.85948	3.29379	3.15009
aPF07_0021_1	aPF07_0021_1::PF07_0021::hypothetical protein	2.26912	2.78562	2.97895	2.39186	2.22864	2.36448	2.37238	3.39212	3.74213	3.07444	2.87834	3.0126	2.79123	2.82325	2.87188
aPFL1490w_0	aPFL1490w_0::PFL1490w::hypothetical protein	0.335331	0.280007	0.273551	0.311868	0.417583	0.310615	0.321353	0.229895	0.242255	0.26624	0.3823	0.408807	0.404861	0.398244	0.422373
aPFI1720w_0	aPFI1720w_0::PFI1720w::hypothetical protein	0.0384372	0.0311118	0.0340302	0.070464	0.11625	0.0528257	0.0409693	0.0574737	0.0584262	0.0621227	0.0339242	0.0339625	0.0416429	0.060043	0.0644941
aPF10_0106_0	aPF10_0106_0::PF10_0106::hypothetical protein	1.06564	0.768907	0.727723	0.759445	0.688324	0.645529	0.727206	0.74364	0.655513	0.704902	1.15603	1.00881	0.947376	1.07587	1.13307
aPF10_0266_0	aPF10_0266_0::PF10_0266::hypothetical protein	0.478476	0.338897	0.277477	0.228356	0.286037	0.401475	0.468587	0.337805	0.230855	0.360058	0.632817	0.773589	0.655876	0.680079	0.763812
aMAL13P1.21_0	aMAL13P1.21_0::MAL13P1.21::hypothetical protein	2.42949	1.94449	2.24338	2.07869	2.0252	1.84678	2.45304	2.57928	2.44535	2.58253	2.84441	3.11448	2.7681	2.85388	2.65437
aPF10_0363_1	aPF10_0363_1::PF10_0363::pyruvate kinase, putative	0.983461	0.884465	0.702855	0.951264	0.919295	1.03327	0.83475	0.648632	0.565737	0.485571	0.8194	0.762269	0.855993	0.922701	0.918092
aMAL13P1.121_0	aMAL13P1.121_0::MAL13P1.121::hypothetical protein	2.19489	1.94227	1.22378	1.01651	1.10438	2.31799	2.61948	1.51543	1.3438	1.18413	1.62184	1.5585	1.41007	1.30624	1.71478
aPFC0221c_0	aPFC0221c_0::PFC0221c::hypothetical protein	0.801879	0.724461	0.54841	0.53109	0.539952	0.662434	0.727206	0.672091	0.541511	0.688421	1.56443	1.68177	2.23484	2.53774	2.59873
aPF11_0108_1	aPF11_0108_1::PF11_0108::hypothetical protein, conserved	1.34795	1.01336	0.938449	0.893849	0.897881	1.01742	1.04088	0.965324	0.836492	0.893806	1.59183	1.7258	1.62523	1.64077	1.69202
aMAL13P1.246_2	aMAL13P1.246_2::MAL13P1.246::hypothetical protein	0.278338	0.451122	0.358626	0.514126	0.370165	0.329632	0.167718	0.460963	0.48451	0	0.480158	0.378619	0.303068	0	0.316148
aPF10_0079_5	aPF10_0079_5::PF10_0079::hypothetical protein	1.59315	1.4267	1.51435	1.80075	1.68869	1.48229	1.50178	1.69606	1.81834	1.60251	1.78233	1.50944	1.61945	1.66405	1.5213
aMAL8P1.68_1	aMAL8P1.68_1::MAL8P1.68::hypothetical protein	0.414856	0.471122	0.633486	1.47713	2.09862	0.332802	0.286785	0	0.617038	0.820273	1.62184	1.74592	1.56392	0.839376	0
aPFE1350c_0	aPFE1350c_0::PFE1350c::ubiquitin-conjugating enzyme, putative	1.69256	1.6067	1.67795	1.31663	1.27569	1.25619	1.57476	1.63038	1.82546	1.64181	1.45352	1.71699	1.18798	0.965589	1.10019
aPF08_0072_0	aPF08_0072_0::PF08_0072::hypothetical protein	0.340633	0.416676	0.22905	0.348405	0.484886	0.393023	0.329035	0.464481	0.329182	0	0.293575	0.343398	0.261425	0.220566	0.336381
aMAL7P1.207_1	aMAL7P1.207_1::MAL7P1.207::	3.28969	1.87004	2.43185	2.42318	2.22099	2.24826	2.78464	2.76578	3.27187	3.32039	3.442	3.13838	3.03646	2.93475	2.80107
aPFE1160w_0	aPFE1160w_0::PFE1160w::hypothetical protein	3.78142	2.84118	2.25385	1.77595	1.76823	3.81718	3.84856	2.7083	2.30712	2.2174	3.47984	2.76605	2.52171	2.51568	3.02237
aMAL7P1.89_1	aMAL7P1.89_1::MAL7P1.89::hypothetical protein	1.16372	1.13114	0.927978	1.05566	0.943769	0.717372	0.536442	0	0.778066	0	1.71578	1.92831	1.51881	1.91525	0
aPF11_0115_0	aPF11_0115_0::PF11_0115::hypothetical protein	1.26975	1.0078	0.78924	0.679847	0.709739	0	1.12538	0.88791	0.837917	0.903949	1.066	1.37359	1.12551	1.21434	1.12169
aPFF0810c_0	aPFF0810c_0::PFF0810c::hypothetical protein	0.971532	1.14892		0.699421	0.830578	0.780763	0.763054	0.681474	0.676889	0.926769	1.50571	1.52957	1.43437	1.47902	1.41887
aPF13_0254_5	aPF13_0254_5::PF13_0254::hypothetical protein	1.93379	1.44003	1.36252	1.19528	1.00189	1.59111	1.60421	1.43332	1.23978	1.14103	1.8293	1.7107	1.808	1.63096	1.84251
aPF11_0109_0	aPF11_0109_0::PF11_0109::hypothetical protein	0.919841	0.610014	0.481659	0.40843	0.512419	0.788159	0.731047	0.563008	0.389033	0.518534	0.861153	0.792457	0.758826	0.877363	0.894065
aPF10_0245_1	aPF10_0245_1::PF10_0245::glucosamine--fructose-6-phosphate aminotransferase, putative	1.63557	1.38448	1.37168	1.45495	1.34606	1.59111	1.61829	1.41925	1.57181	1.44277	1.38959	1.53837	1.76867	1.91525	1.92724
aPFE1410c_0	aPFE1410c_0::PFE1410c::hypothetical protein	0.74356	1.30559	2.81796	3.82593	4.38845	0.768085	0.757933	2.30833	4.45322	4.90135	0.221812	0.164781	0.158474	0.181354	0.204864
achr5tRNAArg1_0	achr5tRNAArg1_0::chr5-tRNA-Arg-1::(tRNA) tRNA-Arg	0.372443		0.599456	0.438443	0.437468	0	0	0	0.413258	0.754347	0.726761	0.764784	0	1.05994	1.47831
aPFI0330c_0	aPFI0330c_0::PFI0330c::hypothetical protein	0.828387	0.683349	0.435849	0.332747	0.46806	0	0.606858	0.53603	0.460284	0.367665	0.908125	0.715727	0.877971	0.93618	0.776458
aPF08_0033_0	aPF08_0033_0::PF08_0033::hypothetical protein, conserved	0.404253	0.532235	0.611235	0.452796	0.550659	0.475431	0.39305	0.674436	0.528686	0.581925	1.21866	1.20126	1.30828	1.4974	1.38473
aPF13_0138_0	aPF13_0138_0::PF13_0138::hypothetical protein, conserved	0.501008	0.377787	0.344229	0.382332	0.43135	0.491279	0.430178	0.414045	0.381908	0.351183	0.594978	0.563525	0.591098	0.678853	0.644941
aPFL0765w_0	aPFL0765w_0::PFL0765w::hypothetical protein	3.67141	3.25674	2.85461	2.46755	1.93801	3.3502	3.50928	2.61447	2.09622	1.8434	2.38513	2.23523	2.118	2.41152	2.17509
aMAL13P1.83_0	aMAL13P1.83_0::MAL13P1.83::hypothetical protein	1.22601	1.20003	0.939758	0.610688	0.677617	1.19597	1.22268	0.926617	0.800866	0.742937	1.56965	2.3346	2.18047	1.80374	2.0676
aPF14_0539_0	aPF14_0539_0::PF14_0539::hypothetical protein	0.795251	1.0178	0.955464	0.461931	0.535363	0.739559	0.643987	0.66388	0.574287	0.607281	1.31261	1.54215	0	1.89442	1.63259
aPFF0910c_1	aPFF0910c_1::PFF0910c::hypothetical protein	1.13456	1.07891	1.08635	0.991716	0.888703	1.75276	1.58756	1.38758	1.05025	0	1.1743	0.964786	1.43899	1.36873	1.45301
aPFI1045w_0	aPFI1045w_0::PFI1045w::hypothetical protein	0.804529	0.764462	0.744739			0.737446	0.650388	0.669745	0.624163	0.588264	0.882029	0.803778	0.729907	0.724192	0.660116
aPFL1085w_1	aPFL1085w_1::PFL1085w::hypothetical protein	4.9067	5.42124	6.96442	6.04033	3.21065	5.14733	5.1583	9.20401	8.5972	7.81098	1.72492	2.14341	1.80915	1.90422	1.93103
aPFE0005w_2	aPFE0005w_2::PFE0005w::erythrocyte membrane protein 1 (PfEMP1)	0.229297	0.38112			0.552189	0.479657	0.166438	0.329594	0	0.259901	0	0.217611	0	0	0
aPFC0940c_1	aPFC0940c_1::PFC0940c::hypothetical protein	0.795251	1.11114	1.94889	1.58414	0.94071	0.664547	0.652949	1.11898	1.86679	1.93975	0.67457	0.805036	0.983235	1.03176	0.948442
aPFB0405w_2	aPFB0405w_2::PFB0405w::transmission-blocking target antigen s230 precursor	1.19155	1.22781	1.4777	1.19789	1.24051	0.959314	0.978143	1.1612	1.56896	1.67224	0.915953	1.239	1.07693	1.20209	0.976263
aPFL1345c_0	aPFL1345c_0::PFL1345c::hypothetical protein, conserved	0.299545	0.277784	0.293184	0.340576	0.370165	0.394079	0.320073	0.289714	0.303531	0.304274	0.447539	0.474217	0.511282	0.563669	0.548832
aPF08_0063_0	aPF08_0063_0::PF08_0063::hypothetical protein	1.08154	0.866687	0.729032	0.688981	0.651613	1.11885	1.04088	0.761234	0.718215	0.580657	1.30739	1.54718	1.44825	1.55009	1.47072
aMAL8P1.61_1	aMAL8P1.61_1::MAL8P1.61::hypothetical protein	2.0544	2.28783	2.15568	1.68592	1.7927	2.29158	2.01518	1.8286	1.58891	2.34291	2.87051	3.36857	3.34994	3.88686	3.6749
aPF14_0319_3	aPF14_0319_3::PF14_0319::hypothetical protein	3.63032	2.89451	2.35201	2.01866	1.82788	0	2.84097	2.55934	2.41257	2.36066	2.82745	2.89436	2.89302	3.0046	2.88074
aPF08_0135_0	aPF08_0135_0::PF08_0135::hypothetical protein, conserved	0.45727	0.363342	0.359935	0.356235	0.432879	0.405701	0.382807	0.355399	0.347707	0.394289	0.682398	0.822646	0.720653	0.703361	0.964882
aMAL8P1.131_0	aMAL8P1.131_0::MAL8P1.131::Gas41 homologue	1.09612	0.928911	0.778769	0.722909	0.643965	1.10934	0.979423	0.716662	0.702539	0.649119	0.921173	0.862898	0.775021	0.832024	0.824513
aPFL0235w_0	aPFL0235w_0::PFL0235w::hypothetical protein	1.21143	1.34448	1.07719	0.914727	0.725035	1.18541	1.11385	0.796422	0	0.763222	0	1.26542	1.19145	1.25845	1.25068
aMAL7P1.108_0	aMAL7P1.108_0::MAL7P1.108::hypothetical protein	1.02853	1.22003	1.96852	2.1896	2.2317	1.07553	1.4032	1.97757	3.05241	3.18347	0.926392	0.947175	1.01794	1.0048	1.03443
aPF10_0122_0	aPF10_0122_0::PF10_0122::phosphoglucomutase, putative	1.03118	0.950022	0.850756	0.705945	0.487945	1.24352	0.953818	0.938346	0.842192	0.853236	1.03338	1.03648	1.14287	1.18861	1.04076
aMAL13P1.107_2	aMAL13P1.107_2::MAL13P1.107::hypothetical protein	0.250504	0.353342	0.324596	0.35754	0.336514	0.356045	0.136991	0.21582	0.230855	0.251026	0.290965	0.353461	0	0.412949	0.421108
aPF11_0287_0	aPF11_0287_0::PF11_0287::hypothetical protein	1.00997	0.812241	1.54968	3.23743	3.88827	0.817741	0.929492	1.14009	1.07162	1.56701	0.771123	0.679249	0.623487	0.602881	0.614591
aPFB0485c_1	aPFB0485c_1::PFB0485c::hypothetical protein	0.389673	0.378898	0.378259	0.447577	0.520067	0.498674	0.399451	0.458617	0.418959	0.45134	0.665436	0.788684	0.785431	0.803841	0.810602
aMAL13P1.155_0	aMAL13P1.155_0::MAL13P1.155::hypothetical protein	0.393649	0.443344	0.34292	0.275332	0.23403	0.50607	0.348239	0.368301	0	0.316953	0.572797	0.538368	0.497401	0.507302	0.49319
aMAL13P1.167_0	aMAL13P1.167_0::MAL13P1.167::signal peptidase, putative	1.29228	1.67448	1.48686	1.19397	1.14874	1.70416	1.31998	1.48611	1.37943	0.124245	1.62575	1.1912	1.15096	1.15062	1.08122
aPF14_0585_0	aPF14_0585_0::PF14_0585::ribosomal protein S28e, putative	1.25252	1.24225	0.947611	0.705945	0.784689	0.957201	1.31998	0.78	0.582837	0.810131	1.29564	1.36227	1.14749	1.03666	1.10652
aMAL8P1.113_6	aMAL8P1.113_6::MAL8P1.113::hypothetical protein	2.09814	1.92227	1.25257	1.07653		1.78656	1.85386	1.39814	1.42503	1.29443	0.726761	0.758495	0.802782	0.863884	0.923151
aPF10_0219_1	aPF10_0219_1::PF10_0219::hypothetical protein	0.454619	0.387787	0.311507	0.336661	0.43135	0.508183	0.408413	0.416391	0.294981	0.353719	0.588454	0.616356	0.604979	0.606557	0.605739
aPFI1495w_0	aPFI1495w_0::PFI1495w::hypothetical protein	0.836339	0.567791	0.471188	0.442357	0.374754	0.744842	0.582533	0.572391	0.451734	0.381611	0.690227	0.566041	0.617703	0.6666	0.66391
aPF14_0052_0	aPF14_0052_0::PF14_0052::hypothetical protein, conserved	0.587161	0.55668	0.369097		0.364047	0.565234	0.455784	0.423429	0.317781	0.374004	0.72937	0.669186	0.513596	0.612684	0.773929
aPFF1445c_0	aPFF1445c_0::PFF1445c::cullin-like protein, putative	0.860197	0.865576	0.780078	0.685067	0.582781	0.945579	0.937174	0.950076	1.05595	0.992695	0.956402	0.961012	0	1.06852	1.07743
aPF14_0175_0	aPF14_0175_0::PF14_0175::hypothetical protein	1.36518	0.960022	0.972479	0.919947	0.989657	1.20548	1.33534	1.28671	1.04455	1.07637	1.63619	1.62642	1.66456	1.90545	1.93862
aPFD1210w_0	aPFD1210w_0::PFD1210w::hypothetical protein	0.34726	0.396676		0.280551		0.48177	0.344399	0.423429	0.256505	0	0	0.347172	0.240603	0	0.20107
aPFF1595c_0	aPFF1595c_0::PFF1595c::erythrocyte membrane protein 1 (PfEMP1)	0.225321	0.327785				0.424718	0.120347	0.299098	0	0	0	0.152202	0	0	0.197276
aPFE1325w_6	aPFE1325w_6::PFE1325w::hypothetical protein	0.827061	1.14892		0.585895	0.735742	0.801893	0.70032	1.01693	0.893493	1.2526	1.72622	1.64907	1.48642	1.77188	1.77043
aPF14_0339_0	aPF14_0339_0::PF14_0339::hypothetical protein	0.477151	0.757795	0.621706	0.600249	0.501712	0.714203	0.290626	0.674436	0.661213	0.799988	0.640646	0.777363	0.998273	1.20331	1.2178
aMAL13P1.148_0	aMAL13P1.148_0::MAL13P1.148::P. falciparum myosin	1.38771	1.68671	1.53398	1.50584	1.66727	1.30057	1.93452	1.95293	2.2601	2.51914	1.36219	1.62642	1.62176	1.43736	1.75778
aPF10_0079_3	aPF10_0079_3::PF10_0079::hypothetical protein	1.53351	1.21447	1.59549	1.5215	1.54491	1.27204	1.43521	1.4779	1.48488	1.47573	1.78102	1.95599	1.73975	1.78413	1.86906
aPF14_0031_0	aPF14_0031_0::PF14_0031::hypothetical protein	0.528842	0.573347	0.267006		0.293685	0.623343	0.330315	0.362436	0	0.346112	0.28966	0.422644	0.283403	0	0.451459
aMAL7P1.92_2	aMAL7P1.92_2::MAL7P1.92::cysteine repeat modular protein 2 homologue			0.386112		1.04319	0.169042	0	0	0.401858	0.396825	0.245298	0.381134	0	0.272031	0.199805
aPF11_0350_0	aPF11_0350_0::PF11_0350::hypothetical protein	1.82775	1.33114	1.30493	0.897764	0.957535	1.23401	1.46081	1.15534	0.839342	0.948322	1.14951	1.57988	1.11742	1.0722	1.03191
aPF07_0095_0	aPF07_0095_0::PF07_0095::hypothetical protein, conserved	0.772719	0.621126	0.667516	0.627652	0.595018	0.699412	0.573571	0.55597	0.49021	0.551497	0.506253	0.451575	0.462699	0.56612	0.471692
aPF13_0161_0	aPF13_0161_0::PF13_0161::hypothetical protein	0.335331	0.265562	0.505218	2.59151	3.6833	0.223981	0.266301	0.363609	0.427509	0.750544	0.257041	0.299373	0.301911	0.403146	0.370525
aPF14_0326_9	aPF14_0326_9::PF14_0326::hypothetical protein	0.72898	0.612236	0.543175	0.567627	0.702091	0.790272	0.691358	0.642767	0.547211	0.537551	0.648474	0.616356	0.48005	0.481569	0.538715
aPF07_0040_0	aPF07_0040_0::PF07_0040::lysophospholipase-like protein, putative	1.85028	1.95449	2.33238	1.69505	1.47301	2.09612	2.61564	2.7259	3.14931	2.57746	1.41177	1.37611	1.1151	0.919025	1.04076
aPFC0510w_1	aPFC0510w_1::PFC0510w::zinc finger protein, putative	1.30421	1.19781	1.97375	1.57631	0.686794	2.28418	2.45176	2.08547	2.16747	0.950858	1.07253	1.88429	1.86236	1.81844	1.85389
aPFL1665c_0	aPFL1665c_0::PFL1665c::hypothetical protein	1.22204	1.05558	1.05494	0.65114	0.621021	1.08715	1.16251	0.809324	0.769516	0.704902	1.93759	2.21511	2.11222	2.0819	2.18901
aMAL7P1.64_0	aMAL7P1.64_0::MAL7P1.64::hypothetical protein	1.94704	1.67448	1.44759	1.32316	1.40571	1.8658	1.94348	1.37702	1.32385	1.06242	1.32435	1.5107	1.22152	1.08445	1.28356
aPF13_0170_0	aPF13_0170_0::PF13_0170::glutaminyl-tRNA synthetase, putative	1.05901	0.927799	0.709399	0.681152	0.614903	0.863171	0.645267	0.869143	0.902043	0.863379	1.25259	1.3824	1.30134	1.40182	1.46945
aPF11_0168_3	aPF11_0168_3::PF11_0168::hypothetical protein	1.1836	1.58337	3.03131	3.59105	3.35443	1.25619	1.67462	2.64027	3.66517	3.68426	0.858543	0.798747	0.792372	0.707037	0.70817
aMAL8P1.2_1	aMAL8P1.2_1::MAL8P1.2::hypothetical protein with DNAJ domain	0.261108	0.28334	0.344229	0.247929	0.249326	0.25462	0.216369	0.209955	0.189529	0.244687	0.183974	0.210064	0.181609	0.160523	0.239008
aPF07_0118_7	aPF07_0118_7::PF07_0118::hypothetical protein	1.79462	1.89449	1.90569	1.37927		1.59428	1.51202	1.69372	1.71146	1.35656	1.34653	1.34718	1.30712	1.39569	1.49854
aPFI1495w_1	aPFI1495w_1::PFI1495w::hypothetical protein	0.600415	0.505567	0.506527	0.471065	0.367106	0.602212	0.530041	0.424602	0.408983	0.343577	0.600197	0.600004	0.609606	0.60043	0.526069
aPFL2060c_0	aPFL2060c_0::PFL2060c::rabGDI protein	1.44868	1.26225	1.20676	1.12742	0.871877	1.27099	1.36735	1.52716	1.60743	1.32866	1.14951	1.01133	0.903419	0.931279	0.846011
aPFF1035w_1	aPFF1035w_1::PFF1035w::Pfs77 protein	0.353887	0.376675	0.3547	0.319698	0.835167	0.334915	0	0.619309	1.23835	1.87509	0.808962	0	1.10122	1.0967	1.11537
aPFA0505c_0	aPFA0505c_0::PFA0505c::DNA-directed RNA polymerase 2 subunit, putative	0.991413	0.798907	0.7539	0.649835	0.500182	0.694129	0.933333	0.829264	0.669764	0.612352	0.656303	0.747174	0.703302	0.659247	0.821983
aMAL13P1.142_0	aMAL13P1.142_0::MAL13P1.142::hypothetical protein	1.1001	1.01447	1.15572	1.27488	1.22981	1.37981	1.0716	1.0662	1.2469	1.08017	1.29042	1.14466	0.992489	1.03666	1.02685
aPFE0155w_1	aPFE0155w_1::PFE0155w::hypothetical protein	2.0703	1.7056	1.57848	1.52933	1.28181	1.93131	1.9294	2.03856	1.74709	1.57589	1.79537	1.80756	1.84964	2.04636	2.03093
aPFE0205w_0	aPFE0205w_0::PFE0205w::ATP-dependent helicase, putative	0.89996	1.34336	1.62429	2.44406	2.68905	1.21499	1.36607	1.34184	1.75706	1.52518	1.13777	1.06667	1.16947	1.24375	1.24562
aPF07_0037_0	aPF07_0037_0::PF07_0037::Cg2	1.00599	0.976689	0.679296	0.506297	0.371695	0.849436	0.979423	0.730737	0.520136	0.614888	1.17691	1.5912	1.23425	1.11141	1.38473
aPF07_0049_2	aPF07_0049_2::PF07_0049::erythrocyte membrane protein 1 (PfEMP1)	0.746211	0.76224	0.998656	0.977362	1.19768	0.829363	0.719524	0.982918	1.28538	1.15244	0.799828	0.70818	0.648935	0.624937	0.598151
aPFA0765c_1	aPFA0765c_1::PFA0765c::erythrocyte membrane protein 1 (PfEMP1)	0.265084				0.344162	0.430001	0.281664	0.304963	0	0	0.182669	0.393713	0.239447	0	0.268093
aPFL1865w_1	aPFL1865w_1::PFL1865w::hypothetical protein	0.856221	0.820019	0.836358	0.679847	0.815282	0.904375	0.87572	0.923098	0.796591	0.703635	1.43656	1.95221	1.57202	1.6616	1.7072
aPF10_0326_0	aPF10_0326_0::PF10_0326::hypothetical protein	1.34928	1.05225	0.786622	0.682457	0.697502	0.858945	1.37887	1.10373	0.906318	1.0003	1.32435	1.3195	1.16137	1.19106	1.23171
aPFC0570c_0	aPFC0570c_0::PFC0570c::hypothetical protein	1.60508	1.23447	1.41095	1.19006	1.17168	1.03116	1.17019	1.35356	1.38085	1.31218	1.24737	1.16856	0.914987	1.04279	1.00661
aPF11_0114_0	aPF11_0114_0::PF11_0114::actin, putative	1.5746	0.964467	1.1531	1.38449	1.59232	1.10089	1.12794	1.12836	1.56896	1.35275	0.914649	0.846546	0.742632	0.688656	0.644941
aPF11_0179_0	aPF11_0179_0::PF11_0179::hypothetical protein	2.50504	1.96116	1.95543	1.94689	1.89824	2.25143	1.96013	2.17227	2.17174	2.04751	1.54877	1.20755	1.15096	1.15184	1.16469
aMAL8P1.50_0	aMAL8P1.50_0::MAL8P1.50::hypothetical protein	1.34928	1.19114	0.927978	0.570237	0.517008	1.01003	0.877	0.817534	0.696839	0.483036	1.35305	1.22391	0	1.12611	1.06099
aPF08_0113_0	aPF08_0113_0::PF08_0113::vacuolar proton translocating ATPase subunit A	1.1054	0.874465	1.12823	1.5489	1.92578	1.0618	1.29438	1.32776	1.73996	1.7052	1.24867	1.25284	1.23772	1.29644	1.3215
aMAL13P1.37_0	aMAL13P1.37_0::MAL13P1.37::hypothetical protein	2.16573	2.09783	2.91744	2.60717	2.46573	2.1405	2.84481	4.12638	5.78989	5.88137	2.89269	2.49687	2.32506	2.48259	2.45204
aPFL1275c_0	aPFL1275c_0::PFL1275c::hypothetical protein	1.56797	1.28114	1.20153	1.02173	0.851992	1.62492	1.5069	1.24565	1.2412	0.78731	1.42221	1.40378	1.32101	1.16777	0.980057
aPF10_0026_1	aPF10_0026_1::PF10_0026::hypothetical protein	0.844292	0.584458	0.471188	0.438443	0.440527	0.698355	0.555647	0.665053	0.542936	0.61362	1.24606	1.55095	1.75941	1.7633	1.66041
aPFD0110w_1	aPFD0110w_1::PFD0110w::reticulocyte binding protein, putative	0.0357863	0.0533346	0.488203	3.81158	6.53602	0.0359214	0.0550526	0.152481	0.399008	0.502053	0.0169621	0.0138366	0.00925398	0.0110283	0.0126459
aPFL0015c_0	aPFL0015c_0::PFL0015c::rifin			0.170151			#N/A	#N/A	#N/A	#N/A	#N/A	#N/A	#N/A	#N/A	#N/A	#N/A
aPF14_0381_0	aPF14_0381_0::PF14_0381::delta-aminolevulinic acid dehydratase	1.4911	1.36781	0.883477	0.773799	0.74186	1.46644	1.06392	1.13892	0.768091	0.90902	2.33425	2.12454	1.75479	1.79026	1.72869
aPF13_0308_1	aPF13_0308_1::PF13_0308::DNA helicase	1.31614	1.05558	1.39131	1.36622	1.27416	1.51293	1.64005	1.80163	2.26437	1.81804	1.67011	1.72831	1.81031	2.14807	2.24338
aPFF0965c_0	aPFF0965c_0::PFF0965c::hypothetical protein	1.57725	1.52892	1.23163	1.01259	1.24357	1.26253	0.941015	1.16238	1.01462	0.873521	1.55921	2.01007	1.60441	1.66405	1.71858
aPF11_0191_0	aPF11_0191_0::PF11_0191::hypothetical protein		0.661127	0.818034	0.698116	0.671498	0.573687	0.780978	0.930136	0.870693	1.11821	1.03991	0.900634	0.945062	0.979068	0.988909
aPFF0745c_3	aPFF0745c_3::PFF0745c::ribonuclease, putative	1.59713	1.59337	1.43581	1.20311	0.968243	1.776	1.66054	1.64093	1.49913	1.21203	2.15288	2.23649	2.06479	2.06352	1.92724
aPF10_0380_0	aPF10_0380_0::PF10_0380::trophozoite antigen R45, putative	0.591137	0.356675	0.353391	0.433223	0.622551	0	0.405853	0.431639	0.304956	0.45134	0.459282	0.368556	0.515909	0.393343	0.491926
aPFL0765w_1	aPFL0765w_1::PFL0765w::hypothetical protein	2.74362	5.03678	4.7446	3.82724	2.81448	2.5705	2.3711	4.5803	3.7179	2.75368	2.93053	2.97863	3.14404	2.59533	3.0426
aMAL8P1.154_2	aMAL8P1.154_2::MAL8P1.154::hypothetical protein	0.755489	0.661127	0.520924	0.532395	0.712798	0.564178	0.592775	0.594677	0.604212	0.675743	0.627598	0.753464	0.565649	0.741347	0.786575
aPFB0075c_0	aPFB0075c_0::PFB0075c::hypothetical protein	0.0318101	0.032223	0.0301037	0.0300124	0.027533	0.0274693	0.030727	0.0222857	0.0270756	0.0253562	0.0247908	0.028931	0.013881	0	0
aPFE0890c_0	aPFE0890c_0::PFE0890c::hypothetical protein	0.280989	0.253339	0.314125	0.322308	0.321218	0.303219	0.211248	0.328421	0.22658	0.33597	0.679789	0.511953	0.554082	0.643318	0.675291
aPFL1660c_1	aPFL1660c_1::PFL1660c::hypothetical protein	0.302196		0.307581		0.267682	0.23032	0	0.159519	0.202354	0.322024	1.84495	1.69812	2.05785	1.90422	1.81469
aPFE0250w_3	aPFE0250w_3::PFE0250w::hypothetical protein	1.30686	1.29225	1.00651	0.806421	0.770923	1.4432	1.38144	1.49314	1.46778	1.28556	1.2826	1.23397	1.03529	1.02196	1.10146
aPF14_0109_0	aPF14_0109_0::PF14_0109::hypothetical protein	1.34928	1.37225	1.39	1.361	2.12157	1.16005	1.12282	1.26677	1.07875	1.20188	0.806352	0.836483	0.812036	0.689882	0.670233
aPF11_0202_1	aPF11_0202_1::PF11_0202::clathrin coat assembly protein, putative	0.49173	0.4589	0.600764	0.477589	0.39005	0.449018	0.276543	0	0.448884	0.453876	0.542787	0.472959	0.698675	0.403146	0.680349
aPFB0910w_0	aPFB0910w_0::PFB0910w::hypothetical protein	0.36449	0.326674	0.393965	1.28923	2.18887	0.374006	0.325194	0.353053	0.290706	0.365129	0.17745	0.182391	0.247544	0.247524	0.293385
aPF13_0226_1	aPF13_0226_1::PF13_0226::hypothetical protein, conserved	1.32012	1.73004	1.92533	1.98604	2.48256	1.12413	0.829629	2.54996	3.72218	4.07728	0.912039	0.971075	0.880284	0.832024	0.833365
aPF11_0207_1	aPF11_0207_1::PF11_0207::hypothetical protein	1.1889	0.935577	0.725106	0.611993	0.721975	0.867397	0.888523	0.627519	0.371933	0.551497	1.27868	1.39749	1.34067	1.30011	1.30506
aPFI0285w_1	aPFI0285w_1::PFI0285w::hypothetical protein	1.07226	1.06225	0.873006	0.708555	0.689854	0.826193	1.1305	0.857414	0.863568	0.767025	2.09547	2.22894	2.17006	2.35393	2.4533
aPFF1045w_2	aPFF1045w_2::PFF1045w::hypothetical protein, conserved	0.707774	0.4889	0.603382	0.409735	0.405346	0.728994	0.582533	0.548933	0.51301	0.338505	0.648474	0.70818	0.793528	0.828348	0.796692
aMAL13P1.80_0	aMAL13P1.80_0::MAL13P1.80::hypothetical protein	1.04973	0.851131	1.08111	1.23312	1.18698	0.946636	0.937174	1.05095	1.207	1.16512	1.05035	1.01887	1.1151	1.2364	1.23045
aPFD0320c_2	aPFD0320c_2::PFD0320c::hypothetical protein	1.23397	1.19447	2.10464	1.82815	1.76976	1.20759	1.53635	2.19925	1.51908	1.64435	1.52789	1.77108	2.10759	1.53538	1.62879
aPFF0845c_3	aPFF0845c_3::PFF0845c::erythrocyte membrane protein 1 (PfEMP1)			0.090311			#N/A	#N/A	#N/A	#N/A	#N/A	0	0	0	0	0.0467898
aPFL1955w_2	aPFL1955w_2::PFL1955w::erythrocyte membrane protein 1 (PfEMP1)	0.133867	0.188893			0.149902	0.208133	0.126749	0.205263	0.0897768	0	0.151354	0.337109	0.134183	0	0
aPF14_0350_0	aPF14_0350_0::PF14_0350::hypothetical protein	1.15444	1.11558	1.35859	1.15091	1.14568	1.54885	1.48002	1.82626	1.69436	1.87129	1.66229	1.70693	1.77561	1.75105	1.60097
aPF14_0582_0	aPF14_0582_0::PF14_0582::hypothetical protein	1.65942	1.19003	0.900492	0.767275	0.841285	0.971992	0.901326	0.78	0.772366	1.00284	1.21866	1.29183	1.42974	1.256	1.25447
aPFD0720w_0	aPFD0720w_0::PFD0720w::hypothetical protein	0.151098	0.191116	1.25519	4.06995	5.42093	0.124669	0.231733	0.548933	1.3153	1.46432	0.100468	0.103145	0.0890695	0.0906772	0.0923151
aPF10_0267_1	aPF10_0267_1::PF10_0267::hypothetical protein	0.645479	0.655571	0.679296	0.596334	0.46959	0.742729	0.674714	0.560662	0.447459	0.617423	0.651084	0.615098	0.744945	0.768305	0.753696
aPFE1040c_0	aPFE1040c_0::PFE1040c::hypothetical protein	0.959603	0.788907	0.56019	0.417564	0.414524	0.686733	0.692638	0.652151	0.394733	0.496982	1.12863	1.10818	1.09081	1.13346	1.17733
aPF11_0042_0	aPF11_0042_0::PF11_0042::hypothetical protein	0.140494		0.145283			0.182777	0	0.133714	0	0	0.242689	0.215096	0.157318	0.175227	0.218774
aPF14_0664_1	aPF14_0664_1::PF14_0664::biotin carboxylase subunit of acetyl CoA carboxylase, putative	1.90595	1.89227	2.01825	1.58544	1.56326	2.30425	1.99726	2.2708	2.3114	2.56605	1.58139	1.90316	1.89359	1.90667	1.9892
aPF11_0461_0	aPF11_0461_0::PF11_0461::rab6	2.40564	2.46006	2.99335	2.71808	2.13686	1.93131	2.05487	2.68484	2.243	2.1426	2.28597	2.0214	1.70967	1.51333	1.44037
aPFD0690c_1	aPFD0690c_1::PFD0690c::hypothetical protein	1.27373	0.855575	0.695002	0.698116	0.622551	1.16322	0.819387	0.736602	0.567162	0	1.24215	0.996232	0.843269	0.823447	0.84854
ac5rRNA28s_1	ac5rRNA28s_1::c5rRNA28s::	1.15046	0.927799	1.0942	1.43538	1.41642	1.37664	1.3187	1.15182	1.0645	0.900145	0.742418	0.769816	0.67207	0.537936	0.503307
aPF11_0181_1	aPF11_0181_1::PF11_0181::tyrosine --tRNA ligase, putative	1.75353	1.30225	1.15703	0.940825	1.14262	1.62175	1.40832	1.18818	0.99752	1.37938	3.26847	3.83776	4.20246	4.03881	4.87626
aPFC0080c_1	aPFC0080c_1::PFC0080c::hypothetical protein	0.318101	0.28334	0.234285	0.264892	0.299803	0.367667	0.335436	0.300271	0.299256	0.280186	0.266175	0.261637	0.275306	0.28306	0.303502
aPF14_0216_1	aPF14_0216_1::PF14_0216::hypothetical protein	2.05705	3.40008	3.54569	2.97254	3.10664	2.29792	2.18802	3.1939	3.66802	3.01105	4.09439	4.16984	3.55931	3.08302	3.26517
aMAL8P1.90_0	aMAL8P1.90_0::MAL8P1.90::hypothetical protein	0.451968	0.67446	0.316743	0.3471	0.339573	0.592704	0.498034	0.701414	0.570012	0.353719	0.563664	0.665413	0.418742	0.327173	0.43249
aPFF0450c_0	aPFF0450c_0::PFF0450c::transporter protein, putative	1.00069	1.0278	1.07588	1.28532	1.19309	0.842041	0.987105	0.921925	1.2412	1.21329	0.638036	0.553462	0.465012	0.420301	0.460311
aPFI0370c_0	aPFI0370c_0::PFI0370c::subunit of proteaseome activator complex, putative	1.02985	0.991134	1.11645	0.749006	0.772453	1.10723	1.18427	1.13305	1.21412	0.99016	0.982497	1.00755	0.854836	0.803841	0.857392
aPF07_0067_0	aPF07_0067_0::PF07_0067::hypothetical protein	0.41088	0.28334	0.238212	0.23749	0.324277	0.385627	0.381527	0.326075	0.23228	0.291596	0.575407	0.680507	0.670913	0.710713	0.711964
aPF10_0224_6	aPF10_0224_6::PF10_0224::dynein heavy chain, putative	0.112661		0.181931			0.0792385	0.083219	0	0.128253	0	0.129173	0.137108	0.0994802	0	0
aPF08_0089_0	aPF08_0089_0::PF08_0089::hypothetical protein	1.898	1.9356	1.55885	1.38449	1.23745	2.10774	2.03694	2.12301	1.92949	1.80663	3.09102	2.95599	2.82709	3.29256	3.13745
aPFF0770c_2	aPFF0770c_2::PFF0770c::hypothetica protein with PP2C domain	2.09284	2.85007	1.5667	1.85425	1.84318	2.53141	2.11376	1.97287	2.14039	1.8117	0	2.22014	2.18394	2.23875	1.98161
aPFL1070c_0	aPFL1070c_0::PFL1070c::endoplasmin homolog precursor, putative	2.45998	2.21116	1.61905	1.19919	1.05849	2.21551	2.24819	1.81453	1.74566	1.57969	1.72622	2.40882	2.23484	2.27918	2.33443
aPF08_0139_0	aPF08_0139_0::PF08_0139::rifin			0.189784			0	0	0	0.199504	0.232009	0.070458	0	0	0	0.070817
aPF11_0357_2	aPF11_0357_2::PF11_0357::hypothetical protein	0.507635	0.847798	1.13609	1.0152	0.757156	0.503957	0.380247	1.26325	1.69436	1.99173	0.797219	0.772332	0.710243	0.78546	0.743579
aPFC0705c_3	aPFC0705c_3::PFC0705c::hypothetical protein	2.51697	2.00894	1.63083	1.39101	1.19004	2.71207	2.52986	1.95411	1.56326	1.72422	1.97021	1.60001	1.92945	1.70081	1.85768
aPF13_0258_0	aPF13_0258_0::PF13_0258::sexual stage-specific protein kinase	1.85294	1.87115	2.1426	1.98213		1.74536	2.16881	3.07308	3.79343	3.22277	2.50778	2.6302	3.18221	3.61116	3.22597
aPFE0245c_1	aPFE0245c_1::PFE0245c::hypothetical protein	0.402927	0.435566	0.282713	0.332747	0.376284	0.45747	0.354641	0	0.332032	0.342309	0.46972	0.476732	0.408332	0.43378	0.352821
aPFF1145c_2	aPFF1145c_2::PFF1145c::protein kinase, putative	0.174955	0.125558	0.134812	0.283161	0.637847	0.165873	0.186923	0.173594	0.176704	0.172422	0.131782	0.116982	0.152691	0.154396	0.16819
aPF11_0466_0	aPF11_0466_0::PF11_0466::transport protein, putative	1.13721	1.09225	0.763062	0.609383	0.755627	1.0132	0.844993	0.806978	0.591387	0.739133	1.71056	1.51573	1.03992	1.11141	0.981322
aMAL7P1.211_0	aMAL7P1.211_0::MAL7P1.211::	0.682591		0.621706	0.362759	0.595018	0.740616	0.74513	0.639249	0.721065	0.555301	0.464501	0.592456	0	0.341877	0.469163
aMAL7P1.29_3	aMAL7P1.29_3::MAL7P1.29::hypothetical protein	0.736933	0.988912	1.22901	1.31141	1.29405	0.627569	0.506996	1.17293	1.45495	1.31725	1.01381	1.02391	0.869874	0.882264	0.977528
aPFD0285c_1	aPFD0285c_1::PFD0285c::amino acid decarboxylase, putative	0.490405	0.564458	0.488203	0.540224	0.515478	0.679338	0.499314	0	0	0.494446	0.797219	0.719501	0.748415	1.256	0.662645
aPFE1530c_1	aPFE1530c_1::PFE1530c::hypothetical protein, conserved	0.622947	0.647793	0.544484	0.396686	0.420642	0.437396	0.487791	0.472692	0.391883	0.461483	0.930306	0.896861	0.748415	0.720516	0.816925
aPF08_0025_0	aPF08_0025_0::PF08_0025::hypothetical protein	0.874777	0.854464	0.649192	0.546748	0.582781	0.767028	0.596616	0.670918	0.391883	0.578121	0.490596	0.41887	0.358592	0.405596	0.4464
aPF10_0222_0	aPF10_0222_0::PF10_0222::hypothetical protein	1.35325	1.27781	1.4489	1.47844	1.38736	1.43474	1.46849	1.23275	1.23265	0.997766	0.948573	0.842772	0.851366	0.860208	0.901653
aPF13_0297_0	aPF13_0297_0::PF13_0297::hypothetical protein, conserved	0.93442	0.837797	0.641339	0.507602	0.492534	0.641303	0.628623	0.686166	0.494485	0.670671	0.838972	0.889313	0.958943	0.861433	1.10652
aPF14_0691_1	aPF14_0691_1::PF14_0691::hypothetical protein	1.67268	1.51226	2.03003	3.2283	3.32537	1.64288	1.65542	1.4603	1.92949	1.50235	1.50832	1.30818	1.02256	1.06362	0.964882
aPFC0680w_1	aPFC0680w_1::PFC0680w::hypothetical protein	0.848268	0.690016	0.565425	0.598944	1.02484	0.694129	0.750251	0.680301	0.682589	0.919162	0.525825	0.888055	1.04686	1.26825	1.04961
aPF14_0481_1	aPF14_0481_1::PF14_0481::hypothetical protein, conserved	0.707774	0.678905	0.527469	0.58459	0.584311	0.955088	0.624783	0.729564	0.500185	0.499517	0.995545	0.991201	0.977451	1.05994	1.09893
aPF14_0360_0	aPF14_0360_0::PF14_0360::hypothetical protein	1.15046	0.897799	0.896566	0.88602	0.790808	1.1516	1.09593	1.24448	1.30818	1.19681	1.68577	1.50441	1.83344	1.88094	1.76916
aPFL1670c_1	aPFL1670c_1::PFL1670c::hypothetical protein	2.50372	2.47672	2.08631	1.16527	1.06308	2.05809	1.90635	1.66908	1.2127	1.16639	1.74318	2.55599	1.93986	2.14562	2.23074
aPF14_0088_1	aPF14_0088_1::PF14_0088::hypothetical protein	1.70184	1.79449	1.71067	1.0687	0.998835	1.91018	0	1.5166	1.60458	1.27415	2.25335	2.36731	2.25681	2.15665	2.33443
aPF11_0466_1	aPF11_0466_1::PF11_0466::transport protein, putative	1.30024	0.916688	0.701546	0.591115	0.374754	1.0861	1.01271	0.700241	0.641263	0.599674	1.2017	1.1195	0.899949	0.987646	1.02558
aPFI0495w_4	aPFI0495w_4::PFI0495w::hypothetical protein	1.91921	1.41892	1.70675	1.03478	1.08602	1.67352	2.24307	2.02917	1.67868	1.55941	1.50441	1.63271	1.55467	1.58195	1.54406
aPF10_0044_0	aPF10_0044_0::PF10_0044::hypothetical protein	1.3347	1.44448	1.41487	1.19919	1.24969	1.31219	1.59268	1.64211	1.36803	1.78254	1.40655	1.58743	1.70157	1.3479	1.61235
aPF11_0092_0	aPF11_0092_0::PF11_0092::hypothetical protein	0.844292	0.902243	0.802328	1.0948	1.0539	0.818798	0.643987	0.78	0.981845	1.26147	0.700665	0.665413	0.608449	0	0.605739
aMAL8P1.42_0	aMAL8P1.42_0::MAL8P1.42::hypothetical protein	1.36386	1.35336	1.25912	1.07653	1.02178	1.00791	1.56708	1.29726	0.99182	1.03707	1.64402	1.49938	1.31522	1.35893	1.59085
aPFD0725c_0	aPFD0725c_0::PFD0725c::arsenical pump-driving ATPase, putative	1.35325	1.12336	1.05494	0.94474	0.824459	1.27732	1.26621	1.07441	0.884943	0.822809	1.46918	1.53208	1.39504	1.41652	1.55165
aPF11_0016_0	aPF11_0016_0::PF11_0016::hypothetical protein	0.400277	0.377787	0.236903	0.378418	0.595018	0.508183	0.311111	0.814016	0.327757	0.296668	0.327499	0.547173	0	0.209538	0.316148
aMAL13P1.238_0	aMAL13P1.238_0::MAL13P1.238::hypothetical protein	0.486429	0.442233	0.378259	0.34971	0.521597	0	0.399451	0	0.403283	0.564175	0.545397	0.441512	0.357435	0.408047	0.441342
aPFL1585c_1	aPFL1585c_1::PFL1585c::hypothetical protein	0.50631	0.455566	0.442393	0.554578	0.697502	0.426831	0.375126	0.403489	0.337732	0.447537	0.794609	0.63774	0.585314	0.626163	0.548832
aPF14_0440_1	aPF14_0440_1::PF14_0440::hypothetical protein	0.463897	0.465566	0.700237	1.06348	2.00226	0.550443	0.608139	0.71197	0.933394	0.870985	0.366642	0.410065	0.446504	0.419076	0.459046
aMAL8P1.144_2	aMAL8P1.144_2::MAL8P1.144::hypothetical protein	0.630899	0.643348	1.3154	4.69238	5.99913	0.452188	0.555647	0.551279	0.793741	0.892538	0.589759	0.718243	0.762296	0.737671	0.775194
aPFD0145c_0	aPFD0145c_0::PFD0145c::hypothetical protein	1.08552	0.883354	0.768298	0.730738	0.495593	1.40622	1.0652	1.05681	0.852167	0.834219	1.25389	1.33711	1.53963	1.57582	1.61235
aPFL1175w_1	aPFL1175w_1::PFL1175w::hypothetical protein	0.430761	0.286673	0.329831	0.369284		0.456414	0.412254	0.365955	0.359107	0.365129	0.827229	0.778621	0.85715	0.915349	0.962353
aPFB0440c_0	aPFB0440c_0::PFB0440c::hypothetical protein	0.653432	0.616681	0.602073	0.755531	0.949887	0.667716	0.608139	0.742467	0.699689	0.773364	0.992935	0.935855	0.987862	1.0097	0.885213
aPF10_0127_1	aPF10_0127_1::PF10_0127::hypothetical protein	1.14914	1.0578	1.04447	1.1222	1.08296	1.24669	1.48514	1.49784	2.15607	0	1.04774	0.957238	1.12551	1.1641	1.16216
aMAL13P1.243_0	aMAL13P1.243_0::MAL13P1.243::elongation factor Tu, putative	1.07094	0.928911	0.803637	0.724213	0.572074	0.886414	0.955098	0.996993	0.926269	0.793649	1.50049	1.40127	1.67266	1.63954	1.54406
aPFD0250c_2	aPFD0250c_2::PFD0250c::hypothetical protein	1.64352	1.8856	1.85857	1.85033	1.54949	1.64393	1.92172	2.14764	2.86003	2.28459	2.29249	2.19247	2.332	2.56837	2.40525
aPF11_0084_0	aPF11_0084_0::PF11_0084::hypothetical protein	1.12661	0.874465	0.866462	0.76336	0.595018	1.30691	1.10873	0.871489	0.890643	0.737865	1.71187	1.63649	1.48873	1.54764	1.55545
aPF14_0084_1	aPF14_0084_1::PF14_0084::hypothetical protein	2.34334	1.97449	2.04443	1.52933	1.33688	2.73109	3.10343	2.92764	2.92986	2.45702	2.30424	2.30316	2.3482	2.26448	2.40525
aPF14_0461_2	aPF14_0461_2::PF14_0461::hypothetical protein	2.42287	2.22005	2.03527	1.50976	1.39806	2.22819	1.77705	2.22623	1.91524	2.01709	2.19594	2.26039	2.04282	1.90299	1.90574
aPF13_0270_0	aPF13_0270_0::PF13_0270::hypothetical protein	0.668011	0.533346	0.46857		1.2038	0.700468	0.56845	0.558316	0.451734	0.500785	0.741113	0.738369	0.786588	0.828348	0.830836
aPF10_0317_0	aPF10_0317_0::PF10_0317::hypothetical protein	2.12332	2.25894	1.78397	1.31272	1.08296	2.12782	2.49017	1.872	1.66586	1.42502	1.63228	1.79372	1.58821	1.3332	1.61488
aPF14_0029_3	aPF14_0029_3::PF14_0029::hypothetical protein	1.48447	1.69004	1.7892	2.50278	2.74259	1.08715	1.41344	1.3172	1.49486	1.2564	0.632817	0.472959	0.527477	0.591852	0.588034
aPF14_0471_0	aPF14_0471_0::PF14_0471::hypothetical protein	1.68328	1.23781	1.23818	1.07262	0.838226	1.34388	1.66822	1.65501	1.4749	1.56701	1.32826	1.53586	1.67844	2.03901	1.92976
aPFD1250w_1	aPFD1250w_1::PFD1250w::			0.242138		0.244737	0	0	0	0	0.262437	0	0.127045	0	0	0
aPF11_0252_2	aPF11_0252_2::PF11_0252::hypothetical protein	1.43278	1.24114	0.973788	0.630261	0.628669	1.29951	1.17275	0.761234	0.743865	0.644048	1.53442	1.60001	1.39272	1.28541	1.34299
aPF14_0152_1	aPF14_0152_1::PF14_0152::hypothetical protein	1.8198	1.52448	1.13085	0.921252	0.877996	1.49285	1.42881	1.1788	0.950494	0.92043	2.10852	1.96228	1.82997	2.38824	1.76157
aPFL0690c_0	aPFL0690c_0::PFL0690c::hypothetical protein	0.766092	0.86002	0.515689	0.468455	0.408406	0.844154	0.592775	0.378857	0.339157	0.393021	0.952487	1.01887	0.880284	0.806291	0.861186
aPFL2015w_1	aPFL2015w_1::PFL2015w::hypothetical protein	0.979485	0.853353	0.964626	0.810336	0.868818	0.988896	0.903886	1.08379	1.0474	1.36416	1.24215	1.36856	1.34067	1.45574	1.42772
aPF11_0077_1	aPF11_0077_1::PF11_0077::hypothetical protein	0.854895	0.853353	0.531395	0.409735	0.494064	0.741672	0	0.568873	0.451734	0.556569	1.00859	1.21133	1.00753	0.948434	1.08122
aPF07_0079_0	aPF07_0079_0::PF07_0079::60S ribosomal protein L11a, putative	0.91719	0.740017	0.447628	0.339271	0.344162	1.00686	1.06136	0.565354	0.324907	0.453876	1.14038	1.12076	0.921927	0.83325	0.98638
aMAL7P1.153_0	aMAL7P1.153_0::MAL7P1.153::hypothetical protein	0.922492	1.55559	1.14263	0.683762	0.506301	0.833589	0.953818	1.07323	0.873543	1.24372	1.33348	1.2629	1.22962	1.28664	1.41002
aPFB0210c_0	aPFB0210c_0::PFB0210c::monosaccharide transporter, putative	1.14781	1.04114	1.19237	1.3088	1.0799	1.09455	1.1305	1.13305	1.17422	1.13089	0.803743	0.812583	0.889538	0.905546	0.886478
aPFL1705w_1	aPFL1705w_1::PFL1705w::hypothetical protein	1.49375	1.0578	0.82327	0.743787	0.804574	1.22661	1.20091	1.18232	0.870693	1.2209	1.84104	1.98366	1.90169	2.17135	2.06887
aPF14_0469_0	aPF14_0469_0::PF14_0469::transcription factor IIIb subunit, putative	0.800553	0.897799	0.836358	0.856007	0.773982	0.913884	0.738729	0.943038	1.2982	1.62406	1.50702	1.4629	1.52806	1.6714	1.60224
aPFI0540w_0	aPFI0540w_0::PFI0540w::hypothetical protein	0.192186	0.124447	0.641339	2.7494	5.06759	0.117273	0.134431	0.26391	0.565737	0.767025	0.0639341	0.0830194	0.086756	0.0661698	0.130253
aPF14_0094_0	aPF14_0094_0::PF14_0094::hypothetical protein	1.71377	1.3567	1.33111	1.44321	0.931532	1.74536	1.94092	1.9975	2.08339	1.56955	1.38437	1.45661	1.44015	1.52926	1.63638
aPFE1170w_0	aPFE1170w_0::PFE1170w::hypothetical protein	1.51495	1.3467	1.48686	2.23267	2.13075	1.52244	1.52355	1.46265	1.093	1.2602	1.65968	1.51322	1.47948	1.32217	1.28482
aPF14_0120_0	aPF14_0120_0::PF14_0120::hypothetical protein	2.30755	1.93449	2.09024	1.99126	1.69022	1.41784	1.75912	1.82391	1.74994	1.91693	2.01327	1.94215	1.69463	1.7437	1.79951
aPFL1930w_0	aPFL1930w_0::PFL1930w::hypothetical protein	2.28105	1.64671	1.78397	1.43407	1.5189	2.12465	2.13041	2.59922	1.61741	2.36447	2.35382	2.31574	2.22558	2.38701	2.35593
aMAL13P1.320_0	aMAL13P1.320_0::MAL13P1.320::hypothetical protein	0.243877			0.486724	0.543011	0.176438	0	0	0.343432	0.474161	0.688922	0	0.492774	0	0.457782
aMAL7P1.162_2	aMAL7P1.162_2::MAL7P1.162::dynein heavy chain, putative	0.755489		1.123	1.1744	0.793867	0.745898	0.623502	0.873835	1.90669	2.49632	0.902906	0.835225	1.00059	1.04769	0.95603
aPFC0920w_0	aPFC0920w_0::PFC0920w::histone H2A variant, putative	2.06103	2.19783	2.99597	2.3762	3.31007	1.8172	1.96653	1.94355	2.35557	2.41391	1.6401	1.74718	1.5512	1.29521	1.11663
aPF14_0293_0	aPF14_0293_0::PF14_0293::hypothetical protein	1.89137	2.35228	2.9122	2.1883	3.4768	1.34917	2.30965	2.70713	2.97974	4.18124	0.657608	0.660381	0.577217	0.472992	0.537451
aPF14_0716_0	aPF14_0716_0::PF14_0716::Proteosome subunit alpha type 1, putative	1.26843	1.2767	1.12431	0.955179	0.680676	1.55519	1.33278	1.18935	0.760965	0.831683	1.4209	1.29183	1.3291	1.256	1.27597
aPFD0860w_0	aPFD0860w_0::PFD0860w::hypothetical protein	1.46194	1.46226	1.76826	1.58153	1.54796	1.61013	1.23292	1.6855	2.2886	2.45448	1.18213	0.930823	0.751886	0.795263	0.995232
aPFL0435w_1	aPFL0435w_1::PFL0435w::hypothetical protein	2.27442	1.90782	1.27613	0.952569	0.930002	2.27256	1.88587	1.26559	1.1044	1.20696	2.42558	2.42895	1.95722	2.01328	2.01196
aPFD0990w_0	aPFD0990w_0::PFD0990w::ribosome recycling factor, putative	0.801879	1.00558		1.02173	1.43936	0.950862	0.896204	0.923098	1.1899	1.69253	1.19518	1.17108	0.980921	1.22169	1.15331
aPFI0220w_0	aPFI0220w_0::PFI0220w::prefoldin subunit, putative	1.93114	1.58115	1.0785	0.781628	0.82293	1.41784	1.46209	0.926617	0.691139	0.778435	2.09025	2.06794	1.65646	1.62729	1.78434
aPF14_0517_0	aPF14_0517_0::PF14_0517::peptidase, putative	1.03913	0.760018	0.583749	0.545444	0.62561	0.915997	0.96662	0.689685	0.520136	0.533748	0.897687	0.942144	0.861777	0.944758	0.911769
aPF11_0474_0	aPF11_0474_0::PF11_0474::hypothetical protein, conserved	0.233274	0.4589	0.54841		0.341103	0	0	0	0	0.763222	0.323585	0.225159	0.259111	0.264679	0.269358
aPF10_0373_0	aPF10_0373_0::PF10_0373::hypothetical protein	1.00864	1.08669	0.729032	0.720299	0.591959	1.11251	0.916689	0.853895	0.846467	0.690956	0.981192	1.18743	1.22962	1.343	1.45175
aPFE1135w_0	aPFE1135w_0::PFE1135w::hypothetical protein, conserved	3.22077	3.00451	3.95405	2.74027	2.19346	2.12148	3.27243	2.34235	2.51518	2.31756	2.16332	2.01133	1.96994	2.65047	2.32052
aPFL1085w_0	aPFL1085w_0::PFL1085w::hypothetical protein	2.77543	5.36901	3.85458	4.24741	4.29055	2.91703	2.47993	4.70112	6.50241	3.75652	2.0498	2.37989	1.73975	1.51455	1.94747
aPFL1245w_1	aPFL1245w_1::PFL1245w::ubiquitin-activating enzyme e1, putative	2.11007	2.15338	1.85072	1.59327	1.18545	2.54197	2.37494	2.21567	2.14039	1.45925	2.63695	2.4692	2.39794	2.23017	2.23832
aMAL7P1.162_5	aMAL7P1.162_5::MAL7P1.162::dynein heavy chain, putative	0.554025	0.58668		0.810336	0.536893	0.601156	0.396891	0.919579	1.19702	0.855772	0.344461	0.493085	0.611919	0.60043	0
aPFI0860c_0	aPFI0860c_0::PFI0860c::ATP-dependant RNA helicase, putative	0.783323	0.665571	0.479041	0.435833	0.39158	0.759633	0.729766	0.546587	0.457434	0.414574	0.891163	0.913213	0.853679	0.920251	0.902917
aPF11_0276_1	aPF11_0276_1::PF11_0276::hypothetical protein	0.69717	0.66446	0.980332	0.969532	1.21604	0.681451	0.622222	0.675609	0.579987	0.580657	0.549311	0.592456	0.661659	0.60043	0.641147
aPFE1525w_1	aPFE1525w_1::PFE1525w::hypothetical protein	0.243877	0.351119	0.218579		0.220264	0.226094	0	0.190015	0	0.242152	0	0.225159	0	0	0.150486
aPF07_0064_1	aPF07_0064_1::PF07_0064::hypothetical protein	2.97954	1.45114	1.25388	1.06609	0.963654	2.23664	2.1957	1.59402	1.33525	0.935644	1.54616	1.30064	2.04629	1.26335	1.31517
aPF14_0544_0	aPF14_0544_0::PF14_0544::hypothetical protein	1.45929	1.49559	1.66617	1.46931	1.22828	1.45693	1.44417	1.9025	1.73711	0	2.22073	1.59624	2.18972	2.36986	2.41537
aPFF0210w_0	aPFF0210w_0::PFF0210w::hypothetical protein	1.54014	1.35559	1.12823	1.02434	0.729623	1.75592	1.76424	1.49314	1.59318	1.25513	1.7471	2.0541	2.34126	2.49485	2.52286
achr4tRNAAla1_0	achr4tRNAAla1_0::chr4-tRNA-Al-1::	0.284965	0.250006	0.256536	0.330137	0.204968	0.159533	0.13059	0.130196	0.0798016	0.105228	0.324889	0.510695	0.77155	0.709487	0.699318
aPF14_0364_1	aPF14_0364_1::PF14_0364::cleavage and polyadenylation specifity factor protein, putative	0.816458		0.458099	0.448882	0.500182	0.495505	0.572291	0.470346	0.381908	0.518534	1.06339	1.22013	1.1394	0.81732	1.31644
aPF14_0128_0	aPF14_0128_0::PF14_0128::ubiquitin conjugating enzyme, putative	1.01262	1.01447	0.895257	0.828605	0.760216	1.20654	1.18683	0.992301	1.00607	0.788578	1.21605	1.34089	1.55351	1.69468	1.582
aPFC0560c_0	aPFC0560c_0::PFC0560c::hypothetical protein	0.507635	0.474455	0.427996	0.370588	0.31357	0.420492	0.321353	0.374166	0.26648	0.341041	0.52713	0.581135	0.532104	0.665374	0.582976
aPFB0245c_0	aPFB0245c_0::PFB0245c::DNA-directed RNA polymerase II 16 kDa subunit, putative	1.10672	0.904466	0.793166	0.733348	0.622551	1.05017	1.03832	0.762406	0.639838	0.565443	0.865067	0.856609	0.759983	0.841827	0.808073
aPFL0930w_1	aPFL0930w_1::PFL0930w::clathrin heavy chain, putative	2.04777	2.07449	1.62822	1.21485	1.04625	2.14683	1.84234	1.97287	1.98079	1.53278	2.45168	2.41133	2.90228	2.38701	2.62529
aPF11_0041_0	aPF11_0041_0::PF11_0041::hypothetical protein	0.316775	0.312229	0.236903	0.221831	0.232501	0.441622	0.337997	0.36009	0.22373	0.275115	0.20485	0.257863	0.171199	0.161748	0.280739
aPFL1410c_1	aPFL1410c_1::PFL1410c::hypothetical protein	0.450642	0.453344	0.442393	0.46976	0.443587	0.501844	0.504435	0.530166	0.458859	0.447537	0.403176	0.445286	0.525163	0.53426	0.542509
aPFB0415c_0	aPFB0415c_0::PFB0415c::hypothetical protein	1.10805	0.903354	0.7539	0.70464	0.599607	0.94241	0.836031	0.679128	0.505885	0.514731	1.07775	0.939628	0.871031	0.911673	0.929474
aPFE1395c_0	aPFE1395c_0::PFE1395c::hypothetical protein	3.2274	2.31005	2.09809	1.80336	1.42407	2.35602	2.55546	2.16875	1.41648	1.53151	2.102	1.86165	1.53847	1.53416	1.5858
aPFF1070c_0	aPFF1070c_0::PFF1070c::osjnba0088k19.13 protein	0.675964	0.538901	0.420142	0.401906	0.399228	0.640247	0.643987	0.482075	0.426084	0.450073	0.782866	0.958496	0.886068	1.01828	1.05973
aPFE0710w_1	aPFE0710w_1::PFE0710w::hypothetical protein	2.08621	2.19338	2.22244	1.52411	1.35676	2.18064	1.92684	2.16993	1.70148	1.27795	1.16517	1.49309	2.21517	1.75718	2.18521
aPF08_0011_0	aPF08_0011_0::PF08_0011::leucine -- tRNA ligase	1.47122	0.988912		0.811641	0.717387	1.01637	1.12154	0.866798	0.72819	0.651654	1.37654	1.33083	1.15443	1.19963	1.35185
aPF10_0234_1	aPF10_0234_1::PF10_0234::hypothetical protein	0.937071	0.906688	0.749974	0.698116	0.442057	0.769141	0.640146	0.485594	0.597087	0.398092	0.952487	1.17359	0.979765	1.05382	1.08502
aPF14_0248_0	aPF14_0248_0::PF14_0248::ubiquinol-cytochrome c reductase hinge protein, putative	1.8039	1.72448	1.93841	1.81119	1.73305	1.59005	1.91532	1.9459	1.4635	1.72676	1.40003	1.12076	0.808566	0.88349	0.786575
aPFI1805w_0	aPFI1805w_0::PFI1805w::rifin	0.210742	0.304452	0.264389	0.221831	0.204968	0.399362	0.213809	0.261564	0	0.187636	0.198326	0.272958	0	0	0.178307
aPFD0190w_1	aPFD0190w_1::PFD0190w::hypothetical protein	2.56999	2.58673	3.00775	3.40185	3.21065	2.23136	3.11879	4.5674	6.17608	5.5099	2.03806	2.07171	2.35514	2.69091	2.66828
aPF10_0199_2	aPF10_0199_2::PF10_0199::hypothetical protein	0.611018	1.06669	0.681913	0.451492	0.411465	0.650812	0.345679	0.708452	0.554336	0.569247	1.02164	1.02516	0.998273	1.21556	1.05087
aPF13_0047_0	aPF13_0047_0::PF13_0047::hypothetical protein	1.63027	1.47448	1.21724	0.991716	1.07379	1.32381	1.30846	1.3782	1.17137	1.38572	2.39427	2.26794	1.97804	2.02063	1.91206
aPF14_0185_0	aPF14_0185_0::PF14_0185::ATP-dependent RNA helicase, putative	0.398951	0.427788	0.287948	0.35754	0.367106	0.513465	0.442981	0.38003	0.317781	0.311881	0.570188	0.84403	0.975138	0.975392	1.16216
aPFI0635c_0	aPFI0635c_0::PFI0635c::hypothetical protein	0.58451	0.545568	0.435849	0.524565	0.495593	0.583195	0.583813	0	0.334882	0.375272	0.567578	0.534594	0.524006	0.528133	0.580447
aPF11_0385_0	aPF11_0385_0::PF11_0385::hypothetical protein	0.819109	0.700016	0.587676	0.484114	0.541482	0.755407	0.650388	0.659188	0.423234	0.617423	0.855934	1.0478	0.795842	0.710713	0.899124
aPFE0615w_0	aPFE0615w_0::PFE0615w::hypothetical protein	0.441365	0.530012	0.358626	0.272722	0.282978	0.463809	0.416095	0.363609	0.23228	0.475429	0.482767	0.910697	0.872187	0.88594	0.988909
aPF00_0001_0	aPF00_0001_0::PF00_0001::hypothetical protein	0.221345				0.39005	0	0	0	0.175279	0.221867	0.249212	0.240253	0	0.204636	0.273151
aPFF1535w_0	aPFF1535w_0::PFF1535w::hypothetical protein, conserved in P. falciparum	0.137844		0.191093	0.214002	0.278389	0.194398	0.148514	0.20409	0.132528	0.14453	0.118735	0.162265	0.0879128	0.083325	0.0885213
aPF08_0134_0	aPF08_0134_0::PF08_0134::hypothetical protein	2.01066	1.63226	1.56801	1.3623	1.29558	1.75381	1.86026	1.59519	1.54188	1.31345	1.76797	2.20127	2.10875	2.27673	2.23327
aPF11_0279_0	aPF11_0279_0::PF11_0279::hypothetical protein	0.404253	0.43001	0.507836	0.566322	0.526186	0.389853	0.327755	0.489113	0.514435	0.657993	0.356204	0.491827	0.397921	0.537936	0.542509
aPF11_0416_0	aPF11_0416_0::PF11_0416::myosin heavy chain subunit, putative	0.50631	0.621126	0.641339	0.733348	0.790808	0.474374	0.476269	0.631038	1.13005	2.27318	0.597588	0.86164	0.896479	1.18003	0.929474
aPF14_0022_0	aPF14_0022_0::PF14_0022::exopolyphosphatase, putative	0.605716	0.565569	0.472497	0.441052	0.385461	0.514522	0.486511	0.314346	0.279306	0.315685	0.687617	0.625161	0.475423	0.555091	0.491926
aPFI0550w_1	aPFI0550w_1::PFI0550w::hypothetical protein	0.959603	0.783352	0.574587	0.551968	0.50936	0.911771	0.820667	0.704933	0.656938	0.564175	1.01773	0.875477	0.924241	1.06239	0.990174
aPF14_0149_1	aPF14_0149_1::PF14_0149::hypothetical protein	0.56993	0.864465	2.28003	3.53755	4.20031	0.174325	0.366164	1.15065	1.97794	2.15781	0.581931	0.625161	0.628114	0	0
aPF11_0188_1	aPF11_0188_1::PF11_0188::heat shock protein 90, putative	0.796577	0.690016	0.530086	0.46715	0.451235	0.782876	0.773296	0.530166	0.49306	0.450073	0.959011	1.01384	1.00637	1.06484	1.11284
aPFL0295c_1	aPFL0295c_1::PFL0295c::hypothetical protein, conserved	1.06431	1.07447	1.4489	1.07914	1.27111	0.952975	0.901326	1.43802	1.58463	1.83579	1.40394	1.54215	1.56045	0	1.67179
aMAL13P1.26_1	aMAL13P1.26_1::MAL13P1.26::hypothetical protein	1.02322	0.765573	0.629559	0.441052	0.39005	0.692016	0.646547	0.55597	0.46741	0.381611	1.06992	1.28428	1.25391	1.19106	1.31391
aPF10_0025_1	aPF10_0025_1::PF10_0025::PF70 protein	0.225321	0.220005	0.210726	0.245319	0.347221	0.203907	0.26246	0.242797	0.26078	0.300471	0.23486	0.250316	0.285717	0.268355	0.313618
aPFL0610w_0	aPFL0610w_0::PFL0610w::hypothetical protein	0.646804	0.51779	0.477732	0.571541	0.347221	0.495505	0.335436	0.396451	0.383333	0.346112	0.549311	0.593714	0.674384	0.845503	0.767606
aPF14_0210_1	aPF14_0210_1::PF14_0210::hypothetical protein	1.21939	1.66226	2.0104	1.48105	1.75599	0.923392	1.14202	1.51308	2.38835	1.993	3.87258	4.91827	5.2551	5.99817	5.70457
aPF11_0508_1	aPF11_0508_1::PF11_0508::hypothetical protein	1.79727	1.29003	0.821961	0.535004	0.595018	1.51187	1.45057	0.822226	0.521561	0.599674	1.54486	1.77988	1.57433	1.43613	1.69834
aPFC0565w_1	aPFC0565w_1::PFC0565w::hypothetical protein	0.620296	0.73335	0.611235		0.539952	0.855776	0.581253	0.78	0.619888	0.617423	0.675874	0	0.704459	0.5024	0.601945
aPF14_0179_4	aPF14_0179_4::PF14_0179::hypothetical protein	0.37907	0.547791	0.204181			0.476487	0.184362	0.853895	0.400433	0	0.383604	0.55472	0.484677	0.441132	0.467898
aPFL2305w_0	aPFL2305w_0::PFL2305w::hypothetical protein, conserved	0.901285	1.05669	0.977715	0.780324	0.761745	1.16745	1.09209	1.01459	0.547211	0.811398	0.806352	0.981138	0.930025	0.998674	0.827042
aPFE0555w_0	aPFE0555w_0::PFE0555w::stearoyl-CoA desaturase (acyl-CoA desaturase, faty acid desaturase), putative	3.54417	3.53008	2.70802	2.26659	1.94719	3.65554	3.09062	3.2373	3.01536	2.61042	3.16408	2.37989	2.03125	1.94466	1.78307
aPFB0820c_2	aPFB0820c_2::PFB0820c::hypothetical protein	0.994064	0.992245	1.06672	0.782933	0.851992	0.806119	1.41216	1.20929	1.18135	1.10426	1.02686	1.08428	0.858306	0.828348	0.89533
aPFC0760c_2	aPFC0760c_2::PFC0760c::hypothetical protein	1.05238	1.0678	1.57455	1.35708	1.35829	1.32381	1.46978	1.89546	2.09764	1.95623	1.23171	1.3585	1.53269	1.38344	1.51245
aMAL13P1.120_0	aMAL13P1.120_0::MAL13P1.120::splicing factor, putative	1.01262	0.78224	0.66359	0.439748	0.50783	0.874793	1.03704	0.729564	0.525836	0.546426	1.40133	1.43271	1.3372	1.43736	1.39737
aPFB0875c_0	aPFB0875c_0::PFB0875c::hypothetical protein	0.861522	0.633348	0.623015	0.722909	0.720446	0.568404	0.545404	0.624	0.454584	0.515999	1.37393	1.40001	1.59515	1.72532	1.66167
aPF11_0333_1	aPF11_0333_1::PF11_0333::hypothetical protein	2.6018	1.78115	1.46723	1.31794	1.13038	2.28207	2.45304	2.13591	1.69008	1.80536	2.12026	2.25033	2.51245	2.74237	2.55827
aPFL0345w_0	aPFL0345w_0::PFL0345w::hypothetical protein	0.984786	0.822241	0.662281	0.482809	0.569015	0.75752	0.586374	0.450406	0.50161	0.674475	1.53572	1.6868	2.07405	2.12969	2.12451
aPFC0305w_0	aPFC0305w_0::PFC0305w::EB1 homolog, putative	0.41088	0.692238	0.507836	0.687677	0.885644	0.356045	0.414815	0.57591	0.896343	0.921698	0.452758	0.688054	0.537887	0.612684	0.723346
aPF07_0120_1	aPF07_0120_1::PF07_0120::hypothetical protein	1.93246	1.45781	1.3455	1.05826	0.998835	1.56364	1.83338	1.62686	1.16567	1.29697	2.56911	2.3736	2.34588	2.56837	2.57471
aPF11_0397_0	aPF11_0397_0::PF11_0397::hypothetical protein, conserved	1.38374	1.20225	0.861227	0.705945	0.605725	1.13575	0.973022	0.848031	0.51586	0.574318	1.38045	1.0478	0.837485	0.949659	0.821983
aPF14_0384_0	aPF14_0384_0::PF14_0384::hypothetical protein	0.522215	0.616681	0.650501	0.735957	0.62714	0.536709	0.474988	0.865625	0.934819	0.953393	0.838972	0.933339	1.10701	1.17268	1.11916
aPFL0370w_1	aPFL0370w_1::PFL0370w::hypothetical protein	0.189535		0.616471	0.931691	0.631728	0.148968	0	0	0.413258	0.715045	0.227031	0.256605	0.239447	0	0.343968
aPFI0175w_1	aPFI0175w_1::PFI0175w::hypothetical protein	0.182908	0.177782	0.842903	2.66458	3.97851	0.15742	0.172839	0.374166	0.654088	1.05609	0.155268	0.167297	0.119145	0.106607	0.135311
aMAL8P1.23_0	aMAL8P1.23_0::MAL8P1.23::ubiquitin-protein ligase 1, putative	1.22469	1.00447	1.09551	0.773799	0.838226	1.44003	1.49026	1.28671	1.62881	1.23231	1.32696	1.49057	1.69348	1.55622	2.03473
aPFC0075c_0	aPFC0075c_0::PFC0075c::hypothetical protein	1.21143	0.872243	0.611235	0.561102	0.484886	0.889584	0.885962	0.673264	0.585687	0.526141	0.438405	0.338367	0.331986	0.308792	0.307295
aPF11_0346_0	aPF11_0346_0::PF11_0346::hypothetical protein	0.811156	0.680016	0.574587	0.600249	0.619492	0.860002	0.683676	0.641594	0.689714	0.817737	1.05687	0	1.24813	1.63341	1.44922
aMAL8P1.7_2	aMAL8P1.7_2::MAL8P1.7::hypothetical protein	2.6853	1.81226	1.82193	1.9495	3.27948	2.10352	1.61061	2.20629	2.5508	3.37871	1.95717	1.48303	2.09834	2.14072	2.08531
aMAL13P1.229_0	aMAL13P1.229_0::MAL13P1.229::hypothetical protein	3.12269	2.48895	2.07846	1.86469	1.29252	2.61487	2.7283	2.36932	2.14894	1.86495	3.24107	2.31196	1.91557	1.84173	1.96517
aPF14_0490_0	aPF14_0490_0::PF14_0490::hypothetical protein	0.987437	0.62557	0.710708	0.535004	0.460412	0.874793	0.868038	0.667399	0	0.619959	0.969449	0.823904	0.780804	0.770756	0.851069
aPF08_0011_2	aPF08_0011_2::PF08_0011::leucine -- tRNA ligase	1.00997	0.803352	0.676678	0.515431	0.634788	0.950862	0.829629	0.641594	0.572862	0.608549	1.26433	1.40001	0.975138	0.73522	1.02432
aPF14_0710_4	aPF14_0710_4::PF14_0710::hypothetical protein	0.698496	0.717795	0.523542	0.752921	0.648554	0.530369	0.597896	0.69203	0.712515	0.503321	0.434491	0.4956	0.254484	0.258552	0
aPF10_0186_1	aPF10_0186_1::PF10_0186::hypothetical protein	4.1923	3.6512	2.87555		2.5468	4.21654	4.75372	4.46887	2.97546	6.09056	2.74656	2.3824	2.17353	2.87103	2.65185
aPFL0545w_0	aPFL0545w_0::PFL0545w::kinesin-related protein, putative	0.687892	0.75224	0.736885	0.722909	0.853522	0.500787	0.323914	0.653324	0.900618	0.682082	0.829838	1.24655	0.994802	1.10528	0
aPFD0820w_0	aPFD0820w_0::PFD0820w::hypothetical protein	0.231948	0.370009	0.310199		0.402287	0.315897	0.151074	0.277985	0.273606	0.325827	0.271394	0.323272	0.219782	0.290412	0.293385
aPFF0310w_0	aPFF0310w_0::PFF0310w::hypothetical protein	0.730306	0.828908	1.2565	1.23703	1.82329	0.858945	0.778418	0.754196	0.913444	1.17272	0.447539	0.568557	0.456915	0.427653	0.457782
aPFL1240c_0	aPFL1240c_0::PFL1240c::hypothetical protein	0.962254	0.748906	0.51438	0.351015	0.409935	0.806119	1.03832	0.686166	0.447459	0.562908	1.07383	1.29183	1.14402	1.22537	1.29873
aPFD0005w_1	aPFD0005w_1::PFD0005w::erythrocyte membrane protein 1 (PfEMP1)	0.197487	0.308896				0.265185	0.275263	0.288542	0	0	0	0.236479	0	0	0
aPFE0735w_2	aPFE0735w_2::PFE0735w::hypothetical protein	0.291592	0.455566	0.350773	0.266197	0.290626	0.262015	0.188203	0.225203	0	0.320756	0.350985	0.393713	0	0.295313	0.414786
aPFE1240w_1	aPFE1240w_1::PFE1240w::hypothetical protein, conserved	0.473175	0.417787	0.327214	0.275332	0.365577	0.503957	0.445542	0.438677	0.307806	0.316953	0.507558	0.632708	0.558709	0.524457	0.593093
aPF11_0127_1	aPF11_0127_1::PF11_0127::hypothetical protein	2.05307		2.0994	2.29139	2.53609	1.59428	1.86667	2.54526	2.49665	2.97428	1.81234	2.31825	2.03009	2.30246	2.14601
aPFI1465w_1	aPFI1465w_1::PFI1465w::hypothetical protein	0.527517	0.966689	0.671443	0.777714	0.959065	0.540935	0.521079	0.801113	0.51016	0.845629	0.589759	0.535852	0.447661	0.469316	0.619649
aPFD1050w_0	aPFD1050w_0::PFD1050w::alpha-tubulin ii	0.901285	1.41892	1.43451	1.82554	1.94566	1.26676	1.14586	1.29257	1.81406	1.88904	1.33479	1.53083	1.58243	1.69101	1.22792
aPF11_0101_0	aPF11_0101_0::PF11_0101::hypothetical protein	0.613669	0.460011	0.409672	0.441052	0.388521	0.518748	0.412254	0.430466	0.414683	0.334702	0.517996	0.527047	0.565649	0.637191	0.560213
aPF13_0298_2	aPF13_0298_2::PF13_0298::hypothetical protein	0.450642	0.662238	0.531395	0.571541	0.530774	0.430001	0.334156	0.417564	0.47026	0.744204	0	0.373587	0.322732	0.394568	0.421108
aPF14_0046_0	aPF14_0046_0::PF14_0046::hypothetical protein	0.938397	0.768907	0.578514	0.694201	1.23134	0.741672	0.843712	0.61579	0.545786	0.58446	0.734589	0.740885	0.608449	0.61881	0.618385
aPFD0085c_1	aPFD0085c_1::PFD0085c::ATP-dept. acyl-coa synthetase, putative	0.3963	0.502234	0.379568	1.11829	1.26193	0.552556	0.240695	0.539549	0.294981	0.42852	0.315756	0.464154	0.469639	0.378638	0.478015
aPF14_0478_1	aPF14_0478_1::PF14_0478::hypothetical protein	0.536795	0.66446	0.670134	0.673323	0.610314	0.735333	0.583813	0.728391	0.889218	0.86845	0.471024	0.444028	0.465012	0.476668	0.496984
aPFE0195w_1	aPFE0195w_1::PFE0195w::P-type ATPase, putative	1.25385	1.50892	0.888713	0.828605	0.677617	1.16111	1.0396	1.01459	0.799441	0.755615	1.80451	1.93838	1.68422	1.9128	1.86021
aPFC0965w_4	aPFC0965w_4::PFC0965w::hypothetical protein	0.901285	0.768907	1.17143	1.56848	1.64892	0.908601	0.937174	1.21047	1.61028	1.69887	1.01512	1.10818	1.08503	1.10406	1.14825
aPFB0440c_1	aPFB0440c_1::PFB0440c::hypothetical protein	1.04045	0.806685	0.979024	0.863837	1.30476	0.800837	0.937174	0.992301	0.635563	0.94959	1.15995	1.36479	1.54773	1.46186	1.64776
aPFB0720c_0	aPFB0720c_0::PFB0720c::hypothetical protein, conserved	2.01861	1.72337	1.28006	1.02042	0.85964	1.79502	1.67206	1.42746	1.29393	0.858307	2.25335	2.58995	2.59111	2.83427	2.91741
aPFL0985c_0	aPFL0985c_0::PFL0985c::hypothetical protein	0.774045	0.718906	0.523542	0.506297	0.256974	0.706807	0.926931	0.611098	0.645538	0.664332	1.06339	1.34718	1.61713	1.5023	1.7641
aPFL1930w_3	aPFL1930w_3::PFL1930w::hypothetical protein	1.87944	1.56337	1.72638	1.254	1.16403	1.97991	2.74111	2.50773	2.10049	2.20852	1.91411	1.5107	1.47138	1.22047	1.43657
aPFL1835w_0	aPFL1835w_0::PFL1835w::hypothetical protein	0.463897	0.36112	0.907037	2.20918	3.28101	0.361327	0.412254	0.601715	0.897768	1.23738	0.504949	0.476732	0.460385	0.476668	0.435019
aPF10_0335_0	aPF10_0335_0::PF10_0335::hypothetical protein	1.55339	1.59448	1.4044	1.18223	1.11814	1.54779	1.10233	1.4345	1.2982	1.19808	1.92063	1.70441	1.61482	1.77311	1.59338
aPFL1385c_0	aPFL1385c_0::PFL1385c::101 kd malaria antigen	4.35665	4.16454	5.68305	6.01162	5.62896	4.21549	5.69602	7.05636	7.47428	7.00592	3.11189	2.60756	2.21517	2.04514	1.83871
aPF14_0419_5	aPF14_0419_5::PF14_0419::hypothetical protein	1.14119	0.874465	1.18713	1.45104	2.26535	0.660321	0.535162	0.95594	1.46493	2.00821	0.421443	0.310694	0.242917	0.156847	0.208657
aPF13_0034_0	aPF13_0034_0::PF13_0034::vacuolar ATP synthase subunit h, putative	1.98415	1.48003	1.4934	1.37274	1.21604	2.0528	1.54659	1.80163	1.79126	1.46178	2.2951	2.48806	2.54137	2.61493	2.48745
aMAL7P1.132_3	aMAL7P1.132_3::MAL7P1.132::hypothetical protein	1.68328	2.04227	1.85857	0.807726	1.19157	1.88799	1.98189	1.59167	1.74424	1.54292	2.22856	2.28555	1.58243	1.68365	1.44669
arps8_0	arps8_0::rps8::	1.674	1.61782	1.80229	1.74986	1.45619	1.24774	1.02423	0.805805	0.772366	0.661797	1.22127	0.986169	0.796999	0.748699	0
aPF11_0079_0	aPF11_0079_0::PF11_0079::hypothetical protein	0.874777	0.79113	1.04839	0.807726	0.874936	0.898036	0.444261	0.856241	0.75099	0.819005	0.90943	1.10441	0.799312	0.979068	1.12675
aPF14_0622_0	aPF14_0622_0::PF14_0622::hypothetical protein			0.132194		0.131546	0.134177	0	0.118466	0.192379	0.219331	0	0.122013	0	0	0
aMAL7P1.28_1	aMAL7P1.28_1::MAL7P1.28::hypothetical protein	0.599089	0.461122	0.375641	0.317088	0.319688	0.617004	0.531321	0.385895	0.376208	0.354987	0.752856	0.696859	0.673227	0.756051	0.752431
aPF14_0301_0	aPF14_0301_0::PF14_0301::hypothetical protein	1.70184	1.54337	1.02222	1.06348	1.05237	1.71683	1.5978	1.30899	1.0474	1.04848	1.54225	1.36353	1.29903	1.28909	1.37967
aPFL2125c_1	aPFL2125c_1::PFL2125c::hypothetical protein	1.11998	0.887798	0.708091	0.694201	0.601136	0.949805	0.663191	0.74364	0.518711	0.486839	0.755466	0.978622	1.00059	0.906772	0.957295
aPFL2235w_1	aPFL2235w_1::PFL2235w::hypothetical protein	1.11468	1.08558	1.58764	1.43538	1.77282	0.600099	0.861636	1.31838	1.67441	1.90932	0.878115	1.01384	0.933495	0.974167	0.882684
aPF10_0306_0	aPF10_0306_0::PF10_0306::hypothetical protein	1.40097	1.56781	3.26559	3.90684	4.8718	1.08081	1.68486	3.97507	5.0617	6.96154	1.03599	1.16479	1.14287	1.05627	0.950972
aPF10_0356_0	aPF10_0356_0::PF10_0356::liver stage antigen, putative	0.124589		0.230358			#N/A	#N/A	#N/A	#N/A	#N/A	0.106992	0.138366	0	0	0
aPF14_0379_1	aPF14_0379_1::PF14_0379::hypothetical protein	2.50372	2.24561	1.90177	1.42755	1.34606	2.39406	2.45304	2.38809	2.13897	2.12485	2.62652	1.93083	1.82419	2.14317	1.74513
aPFE0165w_0	aPFE0165w_0::PFE0165w::actin depolymerizing factor, putative	1.6687	1.49892	1.63869	2.39186	3.06075	1.37558	1.60549	1.46851	1.70861	1.55433	0.747637	0.607551	0.584157	0.611458	0.565272
aPFL1260w_0	aPFL1260w_0::PFL1260w::hydrolase / phosphatase, putative	0.614994	0.735573	0.900492	0.776409	0.628669	0.492335	0.56973	0.896121	0.890643	0.536284	0.836362	1.10567	1.6715	2.21301	2.04231
aPFA0285c_1	aPFA0285c_1::PFA0285c::hypothetical protein	1.58785	1.33781	1.82454	1.88948	1.7927	1.86791	1.77705	2.44087	2.86716	2.94512	1.79929	1.80253	1.92483	2.05862	1.93356
aPFD0340c_2	aPFD0340c_2::PFD0340c::hypothetical protein	0.132542	0.184449	0.170151	0.174855		0.172212	0.107545	0.163038	0.115427	0.267508	0.388824	0.284278	0	0.264679	0.218774
aPF13_0148_2	aPF13_0148_2::PF13_0148::hypothetical protein	0.722353	1.4267	0.727723	0.799897	0.946828	1.42841	0.937174	1.01107	1.0987	1.36163	1.82408	1.62642	1.29209	1.25723	1.26459
aPFL1760w_0	aPFL1760w_0::PFL1760w::hypothetical protein	1.81847	1.35892	1.02222	0.965618	0.991187	1.65661	1.38528	1.38993	1.28823	1.20188	2.48951	2.22643	2.16427	2.2608	2.18015
aMAL7P1.37_0	aMAL7P1.37_0::MAL7P1.37::sin3 associated polypeptide p18-like protein, putative	1.47122	1.03002	0.746047	0.668103	0.62408	1.13575	1.16635	0.912542	0.652663	0.791113	1.79929	1.85536	1.77329	2.39192	2.12198
aMAL8P1.112_1	aMAL8P1.112_1::MAL8P1.112::hypothetical protein, conserved	0.398951	0.593347	0.688458	0.76075	0.882584	0.258846	0.325194	0.505534	0.597087	1.15371	0.422748	0.459122	0.562179	0.607782	0.623443
aMAL8P1.78_0	aMAL8P1.78_0::MAL8P1.78::small heat shock protein	0.286291	0.32223	0.380877	0.698116	0.752568	0	0	0.234587	0.396158	0.64278	0.311842	0.221385	0	0.350455	0.409727
aPF13_0248_0	aPF13_0248_0::PF13_0248::pf47	0.591137	0.940022	1.06017	1.05826	1.13191	0.660321	0.48267	0.891429	0.96902	1.05228	0.645865	0.664155	0.850209	1.09303	0.944649
aMAL13P1.294_1	aMAL13P1.294_1::MAL13P1.294::GTP-binding protein, putative	0.715726	0.561124	0.392657	0.482809	0.370165	0.676168	0.52748	0.457444	0.424659	0.31822	0.840276	0.811325	0.685951	0.639642	0.722081
aPFE0570w_8	aPFE0570w_8::PFE0570w::hypothetical protein	1.29493	1.00558	0.931905	0.764665	0.818341	1.11462	1.30718	1.18935	0.924844	1.02059	0.773733	0.693086	0.57259	0.611458	0.684143
aMAL8P1.17_1	aMAL8P1.17_1::MAL8P1.17::disulfide isomerase precursor, putative	1.4129	1.62893	1.2709	0.908203	0.816811	1.5573	1.79497	1.68668	1.3552	1.41488	1.65837	1.82265	1.56508	1.28173	1.58074
aPF10_0289_0	aPF10_0289_0::PF10_0289::adenosine deaminase, putative	0.392324	0.287784	0.278786	0.263588	0.204968	0.414153	0.384088	0.299098	0.26648	0.190172	0.391433	0.359751	0.316949	0.313694	0.307295
aPFC0610c_1	aPFC0610c_1::PFC0610c::hypothetical protein	0.690543	0.574458	0.905728	0.841653	1.21451	0.677225	0.65679	0.704933	0.886368	0.941983	0.574102	0.603777	0.773864	0.910448	0.815661
aPFE0835w_0	aPFE0835w_0::PFE0835w::ubiquitin carboxyl-terminal hydrolase 2, putative	1.47652	1.27336	1.89653	2.33445	2.43667	1.27099	1.55812	1.90602	2.11332	2.43039	1.5018	1.7107	1.51534	1.67018	1.6427
aPFC0350c_0	aPFC0350c_0::PFC0350c::T-complex protein eta subunit, putative	0.469198	0.501123	0.643957	1.32577	1.30017	0.628625	0.510836	0.47973	0.615613	0.707438	0.533654	0.540884	0.549455	0.546514	0.57033
aPFI1595c_0	aPFI1595c_0::PFI1595c::hypothetical protein	0.503659	0.613348	0.429304	0.41626	0.440527	0.403588	1.02807	0	0	0.39936	0.681094	0.476732	0.396764	0.436231	0.424902
aPFA0410w_0	aPFA0410w_0::PFA0410w::hypothetical protein	0.819109	0.688905	0.650501	0.59242	0.90094	0.820911	0.947416	0.744812	0.800866	0.807595	1.14429	1.54718	1.2088	1.18493	1.3215
aPFA0295c_0	aPFA0295c_0::PFA0295c::hypothetical protein	2.51432	2.44006	2.85461	2.78985	2.94909	2.52824	2.97028	3.95396	5.31821	5.26521	2.39427	2.09813	2.19319	2.32942	1.99426
aPFC0581w_0	aPFC0581w_0::PFC0581w::hypothetical protein	2.26249	1.79338	1.7146	1.40928	1.5342	2.0528	2.22899	1.98812	2.04064	2.04244	1.63358	1.50567	1.21574	1.19963	1.13307
aMAL8P1.20_1	aMAL8P1.20_1::MAL8P1.20::hypothetical protein	1.11203	1.40892	1.0353	0.623737	0.691383	0.926562	0.943575	0.984091	0	0.914091	1.56834	1.48429	0	1.50843	1.54154
aPFC0425w_0	aPFC0425w_0::PFC0425w::hypothetical protein	0.74356	0.582236	0.412289	0.465845	0.718916	0.608551	0.654229	0.505534	0.384758	0.420913	0.900296	1.08931	1.03413	1.10406	1.40622
aMAL13P1.100_0	aMAL13P1.100_0::MAL13P1.100::hypothetical protein	1.60906		1.76434	1.32055	1.369	1.79185	1.6823	1.87904	1.76134	1.6976	2.14505	1.71322	1.93871	1.84295	1.92976
aPFL2190c_0	aPFL2190c_0::PFL2190c::hypothetical protein			0.238212	0.199648	0.260034	0.240885	0.153635	0.178286	0.239405	0	0.253127	0.316983	0.222095	0.208312	0.250389
aPF07_0082_5	aPF07_0082_5::PF07_0082::hypothetical protein	1.85824	1.73782	1.39655	1.14047	1.05543	1.5161	1.45569	1.28905	0.98897	0.886199	1.87496	2.08555	1.65646	1.77801	1.65408
aPFC0166w_0	aPFC0166w_0::PFC0166w::	0.421483	0.56668	0.396583	0.358844	0.383932	0.379288	0.284225	0.300271	0.312081	0.381611	1.65837	1.73712	1.45056	1.56234	1.71099
aPF08_0058_0	aPF08_0058_0::PF08_0058::hypothetical protein	0.658733	0.966689	2.20935	2.97776	3.01792	0.667716	1.04344	2.33179	4.58717	5.0294	0.630207	0.705664	0.692891	0.621261	0.612062
aPF08_0032_1	aPF08_0032_1::PF08_0032::hypothetical protein	1.731	1.98227	1.59026	1.10655	1.0126	1.95032	1.79497	1.52481	1.4179	1.05862	1.55268	1.37862	1.17294	0	1.10272
aPFI1650w_0	aPFI1650w_0::PFI1650w::DNA excision-repair helicase, putative	0.852244	0.810019	0.646574	0.549358	0.567485	0.907545	0.961499	0.823399	0.712515	0.682082	1.09732	1.25913	1.28283	1.50475	1.37082
aPF11_0428_0	aPF11_0428_0::PF11_0428::hypothetical protein, conserved	1.08817	0.9378	0.744739	1.15874	0.564426	1.18118	0.929492	1.21047	1.17137	0.703635	1.28129	1.08051	1.19145	1.23272	1.25321
aPFC0205c_0	aPFC0205c_0::PFC0205c::PfGLP-1, 1-cys-glutaredoxin-like protein-1	0.661384	0.624459	0.438466	0.332747	0.357929	0.541991	0.490352	0.53603	0.293556	0.351183	0.775038	0.78491	0.676697	0.696008	0.920622
aPFD1045c_2	aPFD1045c_2::PFD1045c::erythrocyte membrane-associated antigen, putative	0.869475	0.790018	0.837667	0.849483	1.16556	0.711033	1.09721	1.26911	1.87249	2.24149	0.782866	0.864156	0.824761	0.792812	0.906711
aPFC0525c_1	aPFC0525c_1::PFC0525c::glycogen synthase kinase, putative	2.4454	2.08005	1.86381	1.82163	1.5342	2.36025	2.10352	2.32827	2.75316	2.39616	2.31206	2.20379	1.89822	1.93118	1.82607
aPFL1970w_3	aPFL1970w_3::PFL1970w::VAR pseudogene	0.0742235	0.10778	0.0497365	0.0678542	0.0367106	0.158477	0.0870599	0.109083	0.0726765	0	0.0561054	0.0654092	0.0370159	0.0281834	0.0543774
aPFI1165c_0	aPFI1165c_0::PFI1165c::hypothetical protein	0.401602	0.795574	0.583749	0.58981	0.755627	0.468035	0	0.465654	0.48736	0.594603	1.19648	1.24906	2.17815	2.59655	2.26235
aPFF0290w_0	aPFF0290w_0::PFF0290w::long chain polyunsaturated fatty acid elongation enzyme, putative	0.348585	0.351119	0.522233	0.955179	1.71622	0.497618	0.495473	0.607579	0.74814	0.708706	0.361423	0.422644	0.653562	0.714389	0.732198
aPF14_0101_6	aPF14_0101_6::PF14_0101::hypothetical protein	1.34663		1.58895	1.1731	1.24051	1.6376	0.574851	1.61161	1.38228	1.87509	1.46266	1.59749	1.52344	1.21924	1.47578
aPF14_0229_0	aPF14_0229_0::PF14_0229::hypothetical protein	1.26843	1.05447	0.763062	0.695506	0.595018	1.14949	1.14586	1.11898	0.951919	0.807595	1.57748	1.62014	1.92367	2.09905	2.06002
aPFE0635c_2	aPFE0635c_2::PFE0635c::hypothetical protein	0.25183	0.263339		0.311868	0.357929	0.176438	0	0.216993	0.200929	0.240884	0.200936	0.269184	0.197804	0.137241	0.284533
aPFD0055w_0	aPFD0055w_0::PFD0055w::rifin	0.193511	0.246672		0.217916		0.34231	0.181801	0.403489	0.332032	0.180029	0.302708	0.283021	0.159631	0	0.166926
aPF10_0278_1	aPF10_0278_1::PF10_0278::hypothetical protein, conserved	0.414856	0.286673	0.264389	0.238795	0.23403	0.327519	0.400731	0.337805	0.26648	0.273847	0.328804	0.309436	0.350494	0.512203	0.424902
aPF10_0230_0	aPF10_0230_0::PF10_0230::hypothetical protein, conserved	0.501008	0.9578	0.426687		0.403817	0.559952	0.44042	0.7237	0.581412	0.579389	0.311842	0.633966	0.456915	0.3333	0.451459
aPFE0330w_0	aPFE0330w_0::PFE0330w::hypothetical protein	0.785973	0.994468	0.990803	0.972142	0.89941	1.21288	0.558207	0.750677	1.3666	0.959732	1.02947	1.02516	0.965884	1.24987	1.18366
aPF14_0151_0	aPF14_0151_0::PF14_0151::hypothetical protein	1.78666	1.36559	2.39128	2.60978	2.28065	1.74959	2.124	2.86313	3.31889	3.35716	0.683703	0.694344	0.765767	0.920251	0.854863
aPF07_0037_1	aPF07_0037_1::PF07_0037::Cg2	1.06829	0.981134	0.780078	0.572846	0.558307	1.2002	1.07545	0.803459	0.712515	0.571782	1.19126	1.30693	1.28862	1.21556	1.31012
aPF14_0665_0	aPF14_0665_0::PF14_0665::hypothetical protein	1.62496	1.18114	1.00127	0.872971	0.916236	1.34917	1.22652	1.27146	1.13147	1.07257	1.08296	1.13963	1.09197	1.19596	1.16469
aPF14_0561_1	aPF14_0561_1::PF14_0561::hypothetical protein	0.862848	0.580014	0.498674	0.488029	0.452764	0.80295	0.727206	0.602888	0.544361	0.546426	1.18735	1.28932	1.43205	1.57337	1.58453
aPF13_0352_0	aPF13_0352_0::PF13_0352::hypothetical protein	0.37907	0.323341	0.350773	0.3471	0.487945	0.388797	0.332876	0.299098	0.287856	0.292864	0.507558	0.553462	0.690578	0.615134	0.757489
aPFI0910w_1	aPFI0910w_1::PFI0910w::DNA helicase, putative	1.04178	0.972245	0.893948	0.828605	0.770923	1.39671	0.948696	1.09083	0.950494	1.0003	1.52137	1.3434	1.51071	1.44226	1.53395
aMAL13P1.470_0	aMAL13P1.470_0::MAL13P1.470::null	0.0371117	0.0400009	0.0314125		0.035181	0.0338084	0.0345679	0.0609925	0.0541511	0.053248	0.0404481	0.0377361	0.0300754	0.0575922	0.0442606
aPF11_0241_3	aPF11_0241_3::PF11_0241::hypothetical protein	1.28168	1.29559	1.37037	1.58414	1.8906	1.41573	1.26493	1.55765	1.55043	2.10837	1.38045	1.67926	1.7062	1.78168	1.72237
aPFD0403w_0	aPFD0403w_0::PFD0403w::	1.15444	1.03114	0.884786	0.565017	0.726564	0.784989	0.812985	0.869143	0.628438	0.718848	0.622379	0.636482	0.404861	0.454611	0.55389
aPFL1460c_0	aPFL1460c_0::PFL1460c::hypothetical protein	1.21541	1.43226	1.32456	1.29445	1.25581	1.1199	1.15226	1.49901	2.04777	2.24529	0.682398	0.664155	0.720653	0.522006	0.565272
aMAL7P1.25_1	aMAL7P1.25_1::MAL7P1.25::hypothetical protein		0.735573	0.579823	0.5337	0.596547	0.526143	0.430178	0.50788	0.458859	0.547694	1.56051	1.5346	1.13477	1.1543	1.25068
aPF11_0482_2	aPF11_0482_2::PF11_0482::hypothetical protein	2.67204	2.4545	1.35597	1.16788	0.838226	1.61858	1.77833	2.04911	1.91524	1.29951	1.94151	1.9497	1.70505	1.70081	2.23327
aPF13_0176_1	aPF13_0176_1::PF13_0176::apurinic/apyrimidinic endonuclease Apn1	1.26975	1.48892	1.72245	1.83467	1.86306	1.41784	1.67462	1.78051	2.05347	2.18824	1.19909	1.15347	1.12783	1.256	1.12169
aPF11_0326_2	aPF11_0326_2::PF11_0326::hypothetical protein	0.131216	0.170004	0.23952	0.204868	0.140724	0.164816	0.092181	0.129023	0.109727	0.117906	0.176145	0.127045	0.152691	0.245073	0
aPFD1070w_1	aPFD1070w_1::PFD1070w::eukaryotic initiation factor	0.781997	0.643348	0.452864	0.443662	0.434409	0.713146	0.599177	0.496151	0.376208	0.417109	0.874201	0.816357	0.724124	0.758502	0.809338
aPFL0435w_0	aPFL0435w_0::PFL0435w::hypothetical protein	0.862848	0.626681	0.693693	0.679847	0.588899	1.01954	0.74385	0.858587	0.578562	0.578121	0.87942	0.851577	0.932338	0.975392	0.92568
aMAL8P1.113_3	aMAL8P1.113_3::MAL8P1.113::hypothetical protein	0.970207	1.05225	1.23687	1.18614	1.1778	1.24246	0.880841	0.931309	0.803716	0.869718	0.635426	0.523274	0.506655	0.544063	0.460311
aPFE0160c_0	aPFE0160c_0::PFE0160c::Ser/Arg-rich splicing factor, putative	1.06961	0.766685	0.57197	0.421479	0.451235	1.08926	1.0332	0.745985	0.571437	0.617423	1.24606	1.24026	1.09775	1.12611	1.1394
aMAL13P1.234_3	aMAL13P1.234_3::MAL13P1.234::hypothetical protein	1.38639	1.30447	1.7892	1.93515	1.72387	1.53511	1.52355	2.84202	1.89244	2.74354	1.13124	1.14843	1.67844	1.59053	1.58833
aPFL0925w_2	aPFL0925w_2::PFL0925w::Formin 2, putative	0.832363	0.923355	1.74209	1.85033	1.7927	0.812458	1.08825	1.84502	2.3057	2.883	0.673265	0.820131	0.894165	0.905546	0.904182
aPFF1135w_0	aPFF1135w_0::PFF1135w::transcription or splicing factor-like protein, putative	0.85357	0.90891	1.08897		0.772453	1.06497	0.973022	0.896121	0.931969	0.835487	1.21605	1.7497	1.57549	1.62484	1.49727
aPFE0915c_0	aPFE0915c_0::PFE0915c::proteasome subunit beta type 1	1.21011	1.54226	1.42796	1.26705	0.951417	1.61435	1.40576	1.44036	1.54473	1.15878	1.64402	1.39875	1.29209	1.26825	1.18113
aPFF1065c_0	aPFF1065c_0::PFF1065c::hypothetical protein	1.23131	0.9478	0.818034		1.02943	0	0.492912	0	0	1.66083	2.77657	3.02769	2.7681	3.20066	3.08054
aPFF0640w_0	aPFF0640w_0::PFF0640w::hypothetical protein	1.27108	1.08225	0.867771	0.788153	0.813752	1.21816	1.58756	1.02514	1.02317	1.39459	0.67196	0.652834	0.685951	0.721741	0.758754
aPFD0565c_1	aPFD0565c_1::PFD0565c::RNA helicase, putative	0.710425	0.718906	0.536631	0.455406	0.523126	0.643416	0.492912	0.442196	0.347707	0	1.01251	1.07296	0.9601	0.976617	0.947178
aPFI0570w_0	aPFI0570w_0::PFI0570w::GTP-binding protein, putative	2.11669	1.60559	1.16881	0.876885	0.887173	1.7443	1.62853	1.40283	1.0018	1.23231	2.31467	1.87297	1.54426	1.78659	1.6212
aPF13_0318_0	aPF13_0318_0::PF13_0318::hypothetical protein, conserved	1.21276	1.14892	1.21724	0.977362	0.631728	0.971992	0.775857	0.787038	0.785191	0.656726	1.1756	0.929565	0.829388	0.830799	0.725875
aPFL0125c_1	aPFL0125c_1::PFL0125c::hypothetical protein	0.56993	0.557791	0.812799	0.905593	0.936121	0.31801	0.373845	0.33194	0.393308	0.612352	0.46972	0.475474	0.382883	0.393343	0.404669
aPFI0195c_0	aPFI0195c_0::PFI0195c::hypothetical protein	1.173	0.9578	0.883477	0.559797	0.630199	1.23401	1.28157	0.966497	0.823667	0.783507	1.48745	1.73083	1.56855	1.63709	1.67938
aPFI0450c_0	aPFI0450c_0::PFI0450c::apoptosis-related protein, putative	1.11203	0.847798	0.634795	0.59242	0.58737	0.867397	0.74641	0.750677	0.560036	0.58446	1.40655	1.1912	1.34761	1.24007	1.34805
aMAL13P1.237_0	aMAL13P1.237_0::MAL13P1.237::hypothetical protein	0.653432	0.473344	0.341611	0.297515	0.348751	0.671942	0.537723	0.375339	0.324907	0.348648	0.707189	0.698117	0.727594	0.776883	0.747373
aMAL7P1.43_1	aMAL7P1.43_1::MAL7P1.43::RIF pseudogene	0.157725			0.274027	0.344162	0	0	0	0.24653	0	0.240079	0.21258	0.114518	0	0
aMAL13P1.1_1	aMAL13P1.1_1::MAL13P1.1::			0.178004			#N/A	#N/A	#N/A	#N/A	#N/A	0	0	0	0	0.166926
aPFC0820w_3	aPFC0820w_3::PFC0820w::hypothetical protein	0.890682	1.09114	3.31664	4.64932	4.16207	0.721598	0.924371	2.57224	3.75495	3.69313	0.451453	0.46038	0.527477	0.491372	0.443871
aPF11_0036_0	aPF11_0036_0::PF11_0036::hypothetical protein, conserved	1.24854	1.00225	1.18582	1.89339	1.82635	1.35868	1.30462	1.25269	1.43073	1.34641	2.13201	2.25662	2.24525	2.31349	2.56206
aMAL7P1.15_2	aMAL7P1.15_2::MAL7P1.15::hypothetical protein	0.779346	0.630015	0.565425	0.581981	0.533834	0.61806	0.574851	0.646286	0.49021	0.485571	0.647169	0.608809	0.556395	0.569796	0.555155
aPF13_0151_1	aPF13_0151_1::PF13_0151::hypothetical protein	1.08817	1.04891	0.984259	0.81686	0.907058	1.37558	1.1561	1.22571	1.21697	1.31725	1.10906	1.13837	1.19145	1.32462	1.34047
aPFC1065w_1	aPFC1065w_1::PFC1065w::hypothetical protein	1.52556	1.3667	1.41356	1.34534	1.1105	1.48123	1.38015	1.35239	0.827942	0.896342	1.18604	1.42642	1.87856	1.8307	1.7679
aPF11_0007_3	aPF11_0007_3::PF11_0007::erythrocyte membrane protein 1 (PfEMP1)	0.265084		0.248682	0.221831	0.209556	0.249337	0.107545	0.338978	0.24938	0.125513	0.113516	0.132076	0.200117	0.199735	0.218774
aPFF1290c_0	aPFF1290c_0::PFF1290c::hypothetical protein	0.66536	0.67446	0.429304	0.435833	0.572074	0.561008	0.400731	0.313173	0.277881	0.547694	0.814181	0.80252	0.763453	0.796489	0
aPF07_0049_0	aPF07_0049_0::PF07_0049::erythrocyte membrane protein 1 (PfEMP1)	0.689218	0.130003	0.172769		0.204968	0.293711	0.145953	0.392933	0.133953	0.183832	0.0795914	0.167297	0.151534	0.136016	0.237743
ac5rRNA28s_0	ac5rRNA28s_0::c5rRNA28s::	0.316775	0.308896	0.437158	0.476284	0.455823	0.249337	0.341838	0.279158	0.222305	0.264972	0.127868	0.134592	0.0775021	0.0710713	0.0670233
aPFF1280w_0	aPFF1280w_0::PFF1280w::hypothetical protein	1.86221	2.33672	2.72242	2.71547	2.7533	2.15951	2.32117	3.05549	3.90173	3.5131	3.13146	3.12077	2.94508	2.98622	2.839
aPFL0375w_0	aPFL0375w_0::PFL0375w::hypothetical protein	1.72702	1.82671	1.90962	1.55151	1.41948	1.68619	1.6695	1.63624	1.81264	1.80156	1.74057	1.49686	1.19029	1.63464	1.61362
aPF14_0146_0	aPF14_0146_0::PF14_0146::ribonucleoprotein, putative	1.06829	0.971134	0.815417	0.636786	0.58737	0.983614	0.889803	0.639249	0.560036	0.541355	1.30739	1.29812	1.011	1.06362	1.15584
aMAL13P1.249_2	aMAL13P1.249_2::MAL13P1.249::hypothetical protein	2.03319	1.56781	1.86381	1.30097	1.32464	2.00843	2.55802	2.34704	2.46388	2.37588	1.67794	1.78617	1.82188	1.8405	1.87539
aPF07_0024_1	aPF07_0024_1::PF07_0024::hypothetical protein	1.35325	1.24892	1.4934	1.50845	1.38736	1.39037	1.61061	1.81805	2.15037	2.06273	1.35958	1.53963	1.37537	1.45206	1.4606
aPFE0055c_0	aPFE0055c_0::PFE0055c::heat shock protein, putative	0.397626	0.317785	0.28533	0.463236	0.754097	0.319067	0	0	0.313506	0.34738	0.23225	0.172328	0.176982	0.165425	0.173249
aPF07_0045_0	aPF07_0045_0::PF07_0045::hypothetical protein	1.06564	0.997801	0.827196	0.634176	0.478768	1.13575	0.957658	1.09904	0.798016	0.61362	1.05426	0.881766	0.868717	1.10406	1.14698
aPFE0215w_1	aPFE0215w_1::PFE0215w::ATP-dependent helicase, putative	0.791275	1.47892	1.08504	0.690286	0.775512	1.34494	1.10489	0.921925	0.778066	0	1.8032	1.6541	1.39966	1.23149	1.34426
aPF14_0580_0	aPF14_0580_0::PF14_0580::hypothetical protein	1.5693	1.9256	1.66355	0.987801	0.986598	1.59745	1.56068	1.65384	1.25688	0.777167	0	2.03901	1.97341	2.0721	1.7641
aPF11_0431_0	aPF11_0431_0::PF11_0431::membrane skeletal protein, putative	0.478476	0.803352	0.959391	0.548053	1.37512	0.400418	0.0793781	0.326075	0.329182	0.950858	0.790695	0.838999	0.474266	0.486471	0.642412
aPF13_0333_1	aPF13_0333_1::PF13_0333::hypothetical protein	2.16176	1.89782	1.52743	1.07262	1.03249	1.80664	1.60037	1.55296	1.2811	1.30965	2.72307	2.67297	2.17006	2.09048	1.91332
aPFA0435w_0	aPFA0435w_0::PFA0435w::hypothetical protein	1.86089	1.38448	1.32325	1.23573	1.00189	1.6059	1.80137	1.53185	1.44783	1.2526	1.447	1.31322	1.39619	1.41407	1.47831
aPFC0755c_0	aPFC0755c_0::PFC0755c::protein kinase, putative	2.62831	2.63006	2.48159	2.13349	2.01297	2.54303	2.49145	3.23964	3.15359	2.80566	2.29119	2.22643	2.13998	2.15052	2.26109
aPF10_0163_0	aPF10_0163_0::PF10_0163::hypothetical protein	0.170979	0.140003	0.155754	0.563712	1.49902	0.176438	0.17412	0.201744	0.196654	0.263704	0	0.110692	0.106421	0.104156	0.12393
aPFC0760c_4	aPFC0760c_4::PFC0760c::hypothetical protein	1.32277	1.26559	1.36514	1.42624	1.4669	1.36501	1.67334	1.70427	1.81976	1.64308	1.40003	1.48429	1.38347	1.21801	0
aPF10_0354_0	aPF10_0354_0::PF10_0354::hypothetical protein	1.02455	1.06225	2.06668	1.04913	2.56974	0.849436	0.74513	1.07206	1.08302	1.89284	1.82408	1.62894	2.96012	0.980294	1.89688
aMAL8P1.157_0	aMAL8P1.157_0::MAL8P1.157::hypothetical protein	1.1836	1.06114	0.763062	0.660274	0.668439	1.06074	0.883401	0.722527	0.696839	0.641512	1.84365	1.96102	1.55467	1.62484	1.62753
aPFB1050w_0	aPFB1050w_0::PFB1050w::rifin					0.139194	#N/A	#N/A	#N/A	#N/A	#N/A	#N/A	#N/A	#N/A	#N/A	#N/A
aPF14_0218_0	aPF14_0218_0::PF14_0218::actin, putative	0.897309	0.675571	0.692384	0.448882	0.565955	0.658208	0.708001	0.64394	0.601362	0.696028	0.782866	0.762269	0.765767	0.754826	0.804279
aMAL7P1.161_0	aMAL7P1.161_0::MAL7P1.161::dynein light chain, putative	0.417507	0.637793	0.452864	0.335356	1.00954	0.226094	0.361042	0.294406	0.280731	0.893806	0.258346	0.236479	0	0.123762	0.15428
aMAL8P1.35_0	aMAL8P1.35_0::MAL8P1.35::exonuclease, putative	0.678615	0.583347	0.489512	0.471065	0.455823	0.664547	0.474988	0.510226	0.391883	0.396825	0.711103	0.605035	0.685951	0.569796	0.729668
aPFI0625c_0	aPFI0625c_0::PFI0625c::hypothetical protein	0.884054	0.826686	0.693693	0.485419	0.521597	0.836758	0.682396	0.715489	0.815117	0.744204	0.795914	0.865414	0.829388	0.872461	0.937061
aPFA0240w_1	aPFA0240w_1::PFA0240w::hypothetical protein	0.104708		0.232976	0.313173	0.200379	0.120442	0	0.154827	0.185254	0.339773	0.337937	0.280505	0.28109	0.312469	0.421108
aPFE1120w_8	aPFE1120w_8::PFE1120w::hypothetical protein	2.81386	3.71009	7.76805	8.82496	8.35778	3.59743	5.07636	9.1782	10.9941	12.0201	0.867677	0.677991	0.600352	0.540387	0.601945
aPFI0030c_0	aPFI0030c_0::PFI0030c::rifin	0.573906	0.697794	0.79971	1.18353	1.26805	0.657151	0.380247	0.789384	0.773791	0.895074	0.55714	0.509437	0.544828	0.5024	0.49319
aPFL0405w_1	aPFL0405w_1::PFL0405w::hypothetical protein	0.339307	0.28334	0.405745	0.35493	0.416054	0.422605	0.30727	0.363609	0.363382	0.370201	0.502339	0.423902	0.468483	0.423977	0.478015
aPF10_0107_0	aPF10_0107_0::PF10_0107::hypothetical protein	1.76678	2.10005	2.01171	1.17571	2.00991	0.98467	1.3251	1.83799	1.60316	2.27192	1.49397	1.37234	1.34877	1.15675	1.34679
aPF11_0454_0	aPF11_0454_0::PF11_0454::Ribosomal protein, 40S subunit, putative	1.85028	1.44781	1.42011	1.22138	1.07837	1.46116	1.52739	1.41338	0.792316	1.16131	1.6375	1.53208	1.49567	1.08568	1.40496
aPFL0270c_1	aPFL0270c_1::PFL0270c::hypothetical protein	1.47387	1.67337	1.92663	1.8425	1.74834	1.63231	1.64261	1.96466	1.87249	1.88904	1.64793	1.56102	1.79064	1.86133	1.63638
aPFL0885w_1	aPFL0885w_1::PFL0885w::hypothetical protein	0.897309	1.04002	1.12038	1.52281	1.52502	0.86951	1.11641	1.47086	2.61493	2.52167	1.02555	0.977364	1.11973	1.15062	1.17101
atRNARNALys_0	atRNARNALys_0::tRNARNA-Lys::	1.00997	0.99669	1.46592	1.18353	0.798456	0.396192	0.531321	0.472692	0.319207	0.285257	0.357509	0.406292	0.447661	0.11641	0.251653
aPFF0285c_0	aPFF0285c_0::PFF0285c::DNA repair protein RAD50, putative	1.32542	1.22781	0.90311	0.76858	0.682206	1.39354	1.29694	1.07206	0.829367	0.767025	2.06155	2.18114	2.11453	2.39314	2.37237
aPFD0745c_0	aPFD0745c_0::PFD0745c::nonclathrin coat protein zeta2-cop-related protein, putative	1.27903	1.1378	1.61905	1.43407	1.41336	1.34494	1.35967	1.61513	1.42788	1.63294	1.21475	1.12453	1.26085	1.39202	1.22412
arpoC_1	arpoC_1::rpoC::	2.52095	2.62228	3.03262	2.89424	2.5208	1.05017	0.642707	0.566527	0.721065	0.606013	0.395347	0.300631	0.292657	0.263454	0.249124
aPFF0960c_0	aPFF0960c_0::PFF0960c::hypothetical protein	1.82245	2.08227	2.04443	1.39623	1.5862	1.88905	1.51587	2.74349	2.39547	2.93244	3.3063	2.96606	2.9578	3.33177	2.92247
aPF14_0211_0	aPF14_0211_0::PF14_0211::hypothetical protein	2.38178	2.21338	2.2761	2.30443	1.79882	2.22502	2.55034	2.2016	2.52373	2.10203	1.49397	0.576104	1.39272	1.32707	1.23677
aPF13_0164_1	aPF13_0164_1::PF13_0164::hypothetical protein, conserved	2.56999	2.74117	2.55881	2.02258	2.17816	2.77229	3.34924	3.08716	4.63562	3.87443	2.20377	2.48303	2.41991	2.31472	2.20292
aMAL7P1.38_1	aMAL7P1.38_1::MAL7P1.38::regulator of chromosome condensation protein, putative	1.14384	0.920021	0.759136	0.535004	0.501712	0.98784	1.04216	0.598196	0.658363	0.618691	1.33348	1.64026	1.48411	1.51823	1.54406
aPFL2330w_1	aPFL2330w_1::PFL2330w::hypothetical protein	1.23794	1.1278	0.818034	0.745092	0.633258	1.39248	1.32382	1.02045	0.902043	0	0.858543	0.679249	0.717183	0.629839	0.662645
aPF13_0016_0	aPF13_0016_0::PF13_0016::methyl transferase-like protein, putative	1.81185	1.60337	1.34158	0.795982	0.908588	1.40199	1.63621	1.19874	1.05452	0.981285	1.4483	1.21636	0.742632	0.781784	0.744843
aPF13_0322_0	aPF13_0322_0::PF13_0322::falcilysin	2.26779	1.80004	1.46592	1.02042	0.994246	1.73691	1.90635	1.46147	1.41078	1.22597	2.23639	2.2931	2.33894	2.3478	2.48239
aPFD0365c_0	aPFD0365c_0::PFD0365c::hypothetical protein	1.0948	1.0378	0.596838	0.510212	0.639377	0.801893	0.877	0.600542	0.438909	0.574318	0.863762	0.908181	0.729907	0.704586	0.80175
aPFF0810c_1	aPFF0810c_1::PFF0810c::hypothetical protein	0.801879	1.24336	0.812799	0.672018	0.565955	0.446905	0.52492	0.563008	0.518711	0.822809	1.38437	1.21888	1.04454	0.854081	1.04835
aMAL13P1.114_1	aMAL13P1.114_1::MAL13P1.114::hypothetical protein	1.4394	1.89782	2.6897	2.80421	2.89861	1.47489	1.8385	3.82376	5.10303	4.95714	0.84941	0.772332	0.729907	0.699685	0.670233
aPF11_0053_1	aPF11_0053_1::PF11_0053::PfSNF2L	1.51098	1.09558	1.14917	0.918642	0.747979	0.980444	1.37503	1.30547	1.17565	1.1423	1.42221	0.966043	1.17988	1.18493	1.19251
aPFL1950w_1	aPFL1950w_1::PFL1950w::erythrocyte membrane protein 1 (PfEMP1)	0.0715726					0.11516	0.0486511	0.0903158	0	0	0	0.0628935	0	0	0.0518482
aPF13_0229_1	aPF13_0229_1::PF13_0229::IRP-like protein	2.74229	2.7334	3.85981	4.2696	4.3395	1.92602	3.09062	3.88358	4.62849	4.32704	2.18811	2.10316	2.03472	2.11743	1.97023
aPFL1165w_1	aPFL1165w_1::PFL1165w::hypothetical protein	0.286291	0.363342	0.867771	2.15307	3.06228	0.361327	0.302149	0.524301	0.946219	0.948322	0.369252	0.391197	0.358592	0.323497	0.33891
aPFE0250w_2	aPFE0250w_2::PFE0250w::hypothetical protein	1.43145	1.35781	1.39393	0.862532	0.746449	1.48968	1.6503	0	1.13717	1.28429	1.34653	1.51825	1.3638	1.22414	1.38346
aPFL1345c_1	aPFL1345c_1::PFL1345c::hypothetical protein, conserved	0.343284	0.306674	0.329831	0.294905	0.345692	0.375062	0.331596	0.302617	0.307806	0.283989	0.433186	0.489311	0.517066	0.523232	0.541245
aMAL7P1.202_0	aMAL7P1.202_0::MAL7P1.202::	1.54809	1.49559	1.18975	0.93952	0.764804	1.46221	2.21362	1.62686	1.30248	1.42375	1.6127	1.75095	1.81725	1.54764	1.95379
aPFI0260c_6	aPFI0260c_6::PFI0260c::hypothetical protein	0.298219	0.444455	0.267006	0.846873	1.29558	0.377175	0	0.484421	0.950494	1.12835	1.95717	2.1258	2.57955	2.43603	1.72237
aMAL8P1.74_0	aMAL8P1.74_0::MAL8P1.74::hypothetical protein	1.78534	1.33225	0.7539	0.65114	0.604196	2.10774	1.49538	0.81167	0.662638	0.660529	2.13462	2.19498	1.74437	1.79394	1.66167
aPF10_0105_0	aPF10_0105_0::PF10_0105::hypothetical protein	1.26843	1.10558	0.921434	0.917337	0.809163	1.21182	1.08953	0.960632	0.870693	0.792381	1.11167	1.04403	1.19029	1.27806	1.25827
aPF07_0007_0	aPF07_0007_0::PF07_0007::hypothetical protein	0.593788	0.514456	0.484276	0.460626	0.403817	0.611721	0.661911	0.602888	0.579987	0.45134	0.455367	0.494343	0.43378	0.497499	0.531128
aPFC0305w_1	aPFC0305w_1::PFC0305w::EB1 homolog, putative	0.221345	0.266673	0.650501	0.452796	0.570544	0.23032	0.211248	0.412872	0.703964	0.68335	0.268784	0.232706	0.246387	0.28306	0.496984
aPFF0390w_1	aPFF0390w_1::PFF0390w::hypothetical protein	1.28035	1.0778	0.882168	0.810336	1.15485	1.18752	1.20604	0.857414	0.939094	0.716313	2.08503	2.22265	2.49163	2.62229	2.73784
aMAL13P1.332_0	aMAL13P1.332_0::MAL13P1.332::hypothetical protein	1.17962	0.914466	0.660972	0.696811	1.01872	0.932901	1.13562	0.810497	0.820817	0.872253	0.598893	0.656608	0.667443	0.85163	0.873832
aPFI0625c_1	aPFI0625c_1::PFI0625c::hypothetical protein	1.00202	0.924466	0.625633	0.447577	0.539952	0.769141	0.670873	0.68382	0.579987	0.696028	0.722846	0.968559	0.86409	0.852855	1.01041
aPF14_0379_3	aPF14_0379_3::PF14_0379::hypothetical protein	0.881404	1.19114	1.02352	0.661579	0.520067	0.554669	0.79122	0.825745	0.741015	0.565443	0.78939	0.563525	0.521693	0.506077	0.632295
aPFD0235c_0	aPFD0235c_0::PFD0235c::hypothetical protein	1.03913	1.29559	1.68581	1.74594	2.80989	0.888527	1.09337	1.20108	2.02782	3.1784	1.62053	1.77611	1.85542	2.05004	2.06508
aMAL13P1.75_0	aMAL13P1.75_0::MAL13P1.75::hypothetical protein	1.2777	1.04558	0.929287	0.670713	0.680676	1.09455	1.35327	1.02162	0.592812	0.690956	1.5031	1.45661	1.17178	1.29399	1.38346
aPFL0005w_3	aPFL0005w_3::PFL0005w::erythrocyte membrane protein 1 (PfEMP1)	0.316775	0.281118	0.485585	0.358844	0.260034	0	0	0.290887	0	0.264972	0.259651	0.339625	0.239447	0.170326	0.323735
aPFI1210w_1	aPFI1210w_1::PFI1210w::hypothetical protein	2.80326	2.64673	2.71064	2.79638	2.52385	3.04593	3.0855	4.39029	4.22094	4.03797	3.29587	2.91826	2.86989	2.93475	3.01225
aPF10_0360_0	aPF10_0360_0::PF10_0360::hypothetical protein	2.14453	2.12561	1.88344	1.57239	1.32464	1.74853	1.86411	2.05732	1.90241	1.46305	1.70795	1.93083	1.81956	1.88461	1.81722
aPF11_0410_0	aPF11_0410_0::PF11_0410::hypothetical protein	0.465222	0.462233	0.303654	0.364064	0.43135	0.398305	0.276543	0.296752	0.304956	0.551497	0.430576	0.431449	0.304224	0.303891	0.403404
aPF08_0010_0	aPF08_0010_0::PF08_0010::hypothetical protein	1.37048	1.47337	1.0942	0.801202	0.764804	1.54568	1.34559	1.26208	1.04882	1.15751	1.77711	1.98618	1.64258	1.64077	1.80836
aPFD0872w_4	aPFD0872w_4::PFD0872w::	0.698496	0.953356	1.17012	1.18875	0.830578	0.870567	0.596616	0.914888	1.17992	0.815202	0.482767	0.549689	0.631584	0.498724	0
aPF10_0267_0	aPF10_0267_0::PF10_0267::hypothetical protein	0.83899	0.755573	0.552337	0.495858	0.396169	0.720542	0.628623	0.516091	0.426084	0	0.67457	0.735853	0.792372	0.687431	0.758754
aPFC0410w_0	aPFC0410w_0::PFC0410w::rat BRAIN protein-like	0.625598	0.552235	0.448937	0.568932	0.747979	0.511352	0.448102	0.443369	0.48166	0.45134	0.677179	0.641513	0.574903	0.596754	0.636089
aPF10_0319_1	aPF10_0319_1::PF10_0319::hypothetical protein	1.5693	1.27003		0.929081	1.02943	1.22344	1.34559	1.34653	1.47775	1.54546	1.92716	2.28932	2.39215	2.66517	2.51653
aPFD0225w_3	aPFD0225w_3::PFD0225w::hypothetical protein	1.27638	0.990023	0.880859	0.837739	0.770923	1.26887	1.1369	1.34066	1.45068	1.12708	1.06339	1.13334	1.15212	1.30869	1.43278
aPFI1590c_0	aPFI1590c_0::PFI1590c::hypothetical protein	1.42748	1.5367	1.42011	1.34795	0.903999	0	1.96013	1.7289	1.58748	1.13215	2.24161	2.42643	2.38174	2.48137	2.40651
aPF11_0160_0	aPF11_0160_0::PF11_0160::hypothetical protein	1.47652	1.69226	2.06145	1.76943	1.71316	1.84573	1.78985	2.5828	2.6534	2.55971	1.31652	0.96227	0.991332	0.98642	0.907976
aMAL8P1.91_0	aMAL8P1.91_0::MAL8P1.91::hypothetical protein	1.36121	1.14114	2.05098	1.28923	1.56632	1.15583	1.76936	1.81453	2.25867	2.46335	1.58661	1.31447	1.05611	0.976617	0.957295
aPFC0955w_1	aPFC0955w_1::PFC0955w::ATP-dependent RNA helicase	1.72835	1.42337	1.212	1.17962	1.04625	1.81615	1.8385	1.77582	1.55186	1.2919	1.53442	1.39372	1.18451	1.18003	1.20642
aPFA0300c_0	aPFA0300c_0::PFA0300c::vacuolar ATP synthase, putative	1.65147	1.4567	1.90831	1.99126	1.41642	1.9873	1.76808	1.77817	1.80551	1.33247	1.89584	1.85033	2.06711	2.11498	2.08784
aPF11_0400_0	aPF11_0400_0::PF11_0400::hypothetical protein	1.53086	1.36114	1.07326	0.869056	0.74339	1.38931	1.24957	1.18701	1.18847	1.05101	1.87366	1.70315	1.76751	1.69958	1.73375
aPFI1730w_0	aPFI1730w_0::PFI1730w::cytoadherence linked asexual protein (CLAG)	4.58595	4.669	5.58227	5.06558	4.11006	4.22077	5.46813	4.93336	5.85972	4.33718	2.13722	1.59372	1.25391	1.04401	1.0142
aPF13_0130_0	aPF13_0130_0::PF13_0130::vacuolar ATP synthase subunit g, putative	1.82643	1.40114	1.57848	1.17571	0.952946	1.46538	1.72583	1.45092	1.0018	1.1106	1.65968	1.50315	1.07577	1.17023	1.40875
aPF14_0737_0	aPF14_0737_0::PF14_0737::lysophospholipase, putative	0.698496	0.868909	0.922743	0.520651	0.584311	0.844154	0.563328	0	0.575712	0.953393	0.75938	0	0.562179	0.513429	0.532392
aPF11_0358_0	aPF11_0358_0::PF11_0358::DNA-directed RNA polymerase, beta subunit, putative	0.368466	0.357786	0.399201	0.431918	0.501712	0.382458	0.322634	0.32373	0.360532	0.338505	0.403176	0.46038	0.440721	0.415399	0.437548
aPF14_0031_1	aPF14_0031_1::PF14_0031::hypothetical protein	0.591137	0.584458		0.362759		0.655038	0.322634	0.476211	0.356257	0.341041	0.310537	0.479248	0.429153	0.415399	0
aPF07_0017_1	aPF07_0017_1::PF07_0017::hypothetical protein	1.62761	1.76893	2.20804	1.74594	1.49596	1.74008	1.7668	2.38223	2.79733	2.48237	2.04328	2.04026	2.14114	2.0145	2.34708
aPFE0355c_1	aPFE0355c_1::PFE0355c::serine protease belonging to subtilisin family, putative	3.28836	3.45786	3.7106	3.8442	4.09935	3.58052	4.49511	4.25188	5.23413	4.09883	2.34468	2.27297	2.13998	2.02798	1.76157
aPFB0820c_0	aPFB0820c_0::PFB0820c::hypothetical protein	0.742235	0.942244	0.814108	0.857312	0.737272	1.0861	0.798902	1.05329	1.10297	0	1.12994	1.06416	0.903419	0.98397	0.961088
aMAL7P1.79_1	aMAL7P1.79_1::MAL7P1.79::hypothetical protein	0.898634	0.976689	0.575896	0.482809	0.504771	0.829363	0.755372	0.586467	0.534386	0.498249	0.760685	0.972333	0.620016	0.691107	0.728404
aPFA0560c_0	aPFA0560c_0::PFA0560c::hypothetical protein	1.14516	0.984467	0.82327	0.52848	0.461942	1.08187	1.19067	0.719008	0.679739	0.685885	0.760685	0.943402	0.758826	0.90187	1.00156
aPF10_0113_1	aPF10_0113_1::PF10_0113::hypothetical protein	0.620296	0.557791	0.302346	0.284466	0.318159	0.550443	0.670873	0.458617	0.423234	0.580657	1.09601	1.32454	1.60788	1.45083	1.9677
aPF14_0087_1	aPF14_0087_1::PF14_0087::hypothetical protein	0.686567	0.607792	0.492129	0.463236	0.388521	0.253563	0.668312	0.652151	0.585687	0.460215	0.632817	0.797489	0.778491	0.906772	0.889007
aPF14_0282_3	aPF14_0282_3::PF14_0282::hypothetical protein, conserved	0.845617	0.623348		0.434528	0.460412	0.814572	0.696479	0.60406	0.458859	0.486839	0.833753	0.849062	0.798155	0.741347	0.711964
aPF14_0640_1	aPF14_0640_1::PF14_0640::hypothetical protein	0.481127	0.366675	0.314125	0.334052	0.276859	0.323293	0.323914	0.322557	0.299256	0.275115	0.426662	0.379876	0.338927	0.405596	0.381906
aPFI1665w_0	aPFI1665w_0::PFI1665w::uncharacterised trophozoite protein	2.41359	1.97782	1.73816	1.63111	1.54338	2.15529	2.08432	1.96818	1.71431	1.76859	2.45298	2.37234	2.24756	2.32085	2.1928
aPFD0940w_2	aPFD0940w_2::PFD0940w::hypothetical protein	3.02196	4.29677	4.08363	3.26614	2.51315	3.26674	3.12775	2.96517	3.16356	2.33531	2.00675	1.58366	1.40429	1.26458	1.21148
aPFI1580c_0	aPFI1580c_0::PFI1580c::DHHC-type zinc finger protein, putative	2.01729	2.54895	2.36903	1.35056	1.69481	1.99681	3.05094	2.69071	3.38729	2.97555	1.2291	1.20126	0	1.07342	1.36702
aPF10_0177_0	aPF10_0177_0::PF10_0177::erythrocyte membrane-associated antigen	0.892007	0.817797	1.1819	1.62198	1.68257	0.950862	0.985825	0.961805	1.0417	0.887467	0.887248	1.06038	0.992489	0.975392	0.937061
aPFL0575w_2	aPFL0575w_2::PFL0575w::hypothetical protein	1.40229	1.12114	0.993421	0.732043	0.74186	1.24774	1.18555	1.04978	0.809416	0.621227	1.24867	1.3585	1.30944	1.10038	1.31391
aPFA0330w_2	aPFA0330w_2::PFA0330w::pfAARP2 protein	0.787299	0.607792	0.853373	0.94474	1.03096	0.770198	0.798902	0.798767	0.912019	0.910288	1.18735	1.40756	1.31522	1.25478	1.31264
aPFB0670c_0	aPFB0670c_0::PFB0670c::hypothetical protein	0.212067	0.356675	1.87952	3.80636	4.8198	0	0.253498	0.777655	1.63308	1.8434	0.227031	0.279247	0.242917	0.210763	0.239008
aMAL13P1.333_0	aMAL13P1.333_0::MAL13P1.333::hypothetical protein	1.05503	0.883354	0.848138	0.829909	0.838226	0.75435	0.818107	0.742467	0.741015	0.697296	0.862458	0.935855	0.843269	0.861433	0.98638
aPF11_0191_1	aPF11_0191_1::PF11_0191::hypothetical protein	0.804529	0.686683	0.735576	0.711165	0.657732	0.718429	0.862917	0.965324	1.02887	1.01298	1.00729	1.05032	1.00868	1.082	1.04202
aPFA0250w_0	aPFA0250w_0::PFA0250w::hypothetical protein	1.65677	1.33336	1.24865	0.902983	0.726564	1.42418	1.30206	0.959459	0.639838	1.02185	0	0.525789	0.762296	0.798939	0.830836
aPF14_0664_0	aPF14_0664_0::PF14_0664::biotin carboxylase subunit of acetyl CoA carboxylase, putative	1.83836	2.41339	2.03527	1.47191	1.76211	2.03379	1.67974	0	1.93091	2.50646	1.71578	2.0302	1.99423	2.20444	2.18268
aPFF0505c_0	aPFF0505c_0::PFF0505c::conserved hypothetical protein	0.795251	0.67446	0.539248	0.498468	0.656202	0.658208	0.512117	0.629865	0.360532	0.555301	1.19779	1.39372	1.15096	1.36261	1.12549
aPF14_0274_0	aPF14_0274_0::PF14_0274::hypothetical protein, conserved	0.335331	0.238894	0.221196	0.260978	0.256974	0.303219	0.222771	0.23576	0.23228	0.233277	0.610636	0.545915	0.624643	0.70091	0.699318
aPFE1415w_0	aPFE1415w_0::PFE1415w::cell cycle regulator with zn-finger domain, putative	1.35458	1.62004	4.06792	5.78849	5.3001	1.53617	1.85386	3.41793	4.13116	4.94826	0.832448	0.706922	0.893009	0.824672	0.794163
aPF13_0253_0	aPF13_0253_0::PF13_0253::ethanolamine-phosphate cytidylyltransferase, putative	0.585835	0.546679	0.65181	0.628956	1.02637	0.558895	0.693918	0.846858	0.933394	0.97241	0.589759	0.579878	0.637368	0.648219	0.655058
aMAL13P1.390_0	aMAL13P1.390_0::MAL13P1.390::null	0.856221	0.668904	0.588985	0.484114	0.501712	0.933957	0.675994	0.660361	0.608487	0.575586	1.06339	1.3107	1.11973	1.1739	1.18113
aPF11_0126_0	aPF11_0126_0::PF11_0126::hypothetical protein	1.08817	0.977801	1.14394	1.35839	1.59538	0.84521	0.987105	0.916061	0.998945	0.934376	0.806352	0.782394	0.652405	0.746249	0.792898
aPF14_0352_1	aPF14_0352_1::PF14_0352::ribonucleoside-diphosphate reductase, large subunit	2.40166	2.21227	1.83894	1.45626	1.37206	2.35814	2.53882	2.2837	2.51945	2.5876	2.01066	2.32328	2.06017	1.94711	1.99299
aPFE0420c_3	aPFE0420c_3::PFE0420c::guanidine nucleotide exchange factor, putative	1.65147	1.80338	3.15434	3.17349	3.05769	1.42629	1.66054	2.76343	3.66945	3.27729	0.961621	1.11699	1.17178	1.05014	0.978793
aMAL13P1.264_1	aMAL13P1.264_1::MAL13P1.264::hypothetical protein	0.351236	0.232228	0.454173	0.683762	0.673028	0.340197	0.35208	0.437504	0.465984	0.55023	0.358814	0.313209	0.311165	0.2512	0.313618
aPFC0590c_2	aPFC0590c_2::PFC0590c::hypothetical protein	3.12004	2.86229	1.63607	1.07392	1.11661	2.21023	2.18674	1.66908	1.30818	1.17906	2.30815	2.33209	2.26144	2.0868	2.36858
aPFE0660c_0	aPFE0660c_0::PFE0660c::uridine phosphorylase, putative	0.69452	0.583347	0.511762	0.480199	0.382402	0.702581	0.684956	0.443369	0.340582	0.264972	0.553225	0.511953	0.389824	0.408047	0.403404
aPFF1125c_1	aPFF1125c_1::PFF1125c::RNA-binding protein mei2 homologue, putative	0.351236	0.433343	0.327214	0.360149	0.376284	0.408871	0.375126	0.398797	0.51016	0.453876	0.58454	0.709438	0.825917	0.928828	0.863715
aPF10_0143_3	aPF10_0143_3::PF10_0143::ADA2-like protein	1.55472	1.2667	1.48948	1.35839	1.21145	1.40833	1.27261	1.66908	1.61883	1.82184	2.04198	2.14467	1.97919	1.94956	1.98541
aPFD0800c_1	aPFD0800c_1::PFD0800c::hypothetical protein	2.00934	1.73782	2.0405	1.86991	1.57244	1.53723	1.99726	2.03856	2.5109	2.3239	1.45222	1.39623	1.47023	1.7388	1.51119
aPFE0325w_0	aPFE0325w_0::PFE0325w::hypothetical protein	0.99539	1.07891	1.09159	0.76075	1.13344	0.970935	0.866758	0.925444	0.987545	1.14864	1.25259	1.55221	1.46791	1.67385	1.75652
aMAL13P1.123_2	aMAL13P1.123_2::MAL13P1.123::hypothetical protein	2.05572	1.97782	2.28264	2.25093	1.76517	2.32644	2.66685	2.94406	3.05526	2.64338	2.09025	1.6868	1.79643	1.60523	1.77169
aPF11_0306_0	aPF11_0306_0::PF11_0306::A/G-specific adenine glycosylase, putative	1.29891	1.24781	0.86908	0.600249	0.591959	0.856832	1.00119	0.853895	0.632713	0.626298	1.7745	1.75724	1.58821	1.6616	1.51751
aPF14_0321_0	aPF14_0321_0::PF14_0321::ABC transporter, putative	0.447992	0.470011	0.477732	0.837739	0.925413	0.645529	0.39561	0.493805	0.302106	0.390485	0.370557	0.488053	0.537887	0.562443	0.57033
aPF13_0327_0	aPF13_0327_0::PF13_0327::hypothetical protein	1.8092	1.7556	1.68711	1.6272	1.47913	1.63865	1.63365	1.86966	2.13042	1.81424	1.54486	1.61385	1.31753	1.19351	1.3215
aPFE0075c_1	aPFE0075c_1::PFE0075c::rhoptry-associated protein, putative	1.09877	1.53226	3.10199	3.74895	2.93379	1.26465	1.60549	2.82677	3.98296	3.15558	0.549311	0.382392	0.456915	0.395794	0.345233
aPFA0165c_1	aPFA0165c_1::PFA0165c::hypothetical protein	0.800553	0.702239	0.797093	1.09089	1.36441	0.709977	0.594055	0.650978	0.581412	0.594603	0.863762	0.759753	0.990175	1.03298	1.02432
aPF11_0507_2	aPF11_0507_2::PF11_0507::antigen 332, putative	1.0219	0.813352	0.677987	0.511516	0.536893	0.89064	1.02935	0.78	0.581412	0.533748	1.02816	1.17233	1.04107	0.998674	1.01294
aPFE0465c_4	aPFE0465c_4::PFE0465c::RNA polymerase I	0.536795	0.438899	0.382186	0.46715	0.486416	0.508183	0.501874	0.405835	0.457434	0.391753	0.531044	0.549689	0	0.479119	0.498248
aPFE1455w_1	aPFE1455w_1::PFE1455w::sugar transporter, putative	0.465222		0.303654	0.2936	0.183553	0.133121	0.226612	0.248662	0.169578	0.26624	0.138306	0.303146	0.213998	0.35168	0.373054
aPF14_0371_1	aPF14_0371_1::PF14_0371::hypothetical protein	0.903936		0.929287		0.812222	0.836758	0.601737	0.462136	0.594237	0.815202	1.31913	1.45284	1.35339	0	1.30759
aPFA0615w_0	aPFA0615w_0::PFA0615w::hypothetical protein	0.4745	0.388898	0.204181	0.353625	0.35181	0.748011	0.596616	0.52782	0.314931	0.283989	0.304013	0.270442	0.373629	0.508527	0.484338
aPFE0425w_0	aPFE0425w_0::PFE0425w::hypothetical protein	1.25517	1.24558	1.76434	1.71593	1.6581	1.13258	1.45057	2.36346	2.30142	3.02246	1.49136	1.53963	1.26664	1.46309	1.34299
aPF08_0103_2	aPF08_0103_2::PF08_0103::erythrocyte membrane protein 1 (PfEMP1)	0.0172304	0.0111114	0.0196328	0.0182684	0.0152961	0.0359214	0.0243255	0	0.0213754	0.0164815	0.0156573	0.0226416	0.0115675	0	0
aPFF0175c_3	aPFF0175c_3::PFF0175c::hypothetical protein	0.744885	0.675571	0.773533	0.839044	1.0539	0.499731	0.523639	0.611098	0.835067	0.797453	0.805047	0.825162	0.663973	0.845503	0.827042
aPFI1200w_0	aPFI1200w_0::PFI1200w::hypothetical protein	0.943698	0.812241	1.14263	1.90905	3.11428	1.04595	1.11257	1.09083	1.4236	1.47066	0.974668	1.06416	1.09081	1.04646	1.0964
aPFB0240w_1	aPFB0240w_1::PFB0240w::hypothetical protein, conserved	0.560652		0.325905	0.305344	0.301333	0.517691	0.48011	0.388241	0.346282	0.31822	0.709799	0.798747	0.681324	0.759728	0
aPFA0515w_2	aPFA0515w_2::PFA0515w::phosphatidylinositol-4-phosphate 5-kinase, putative	1.12793	0.648904	0.698929	0.875581	0.998835	1.08715	0.939734	0.769444	0.715365	0.62503	1.24476	1.3434	1.26779	1.19596	1.27977
aPF10_0334_1	aPF10_0334_1::PF10_0334::flavoprotein subunit of succinate dehydrogenase	1.0325	1.2167	1.47115	1.04261	0.949887	1.42946	1.09465	1.33362	1.52193	1.18413	1.26694	1.50567	1.60209	1.48637	1.56683
aPF11_0288_0	aPF11_0288_0::PF11_0288::hypothetical protein	0.137844			0.251844		0.131008	0	0	0	0.230741	0.430576	0.586167	0.506655	0.531809	0.513424
aPFI1550c_0	aPFI1550c_0::PFI1550c::hypothetical protein	0.547398	0.676682	2.26039	4.41705	5.13031	0.462753	0.851394	1.08614	2.55223	2.80693	0	0.433965	0.415272	0.389667	0.478015
aPFA0285c_0	aPFA0285c_0::PFA0285c::hypothetical protein	1.62364	2.0356	2.39128	2.2692	2.15369	2.5557	2.55034	3.47071	4.13686	3.93148	2.7596	2.58366	2.75537	2.8502	2.83648
aPFE0060w_1	aPFE0060w_1::PFE0060w::hypothetical protein	0.470524	0.414454	0.454173	0.369284	0.367106	0.535652	0.56973	0.563008	0.532961	0.427252	0.430576	0.438996	0.549455	0.496274	0.499513
aPF14_0419_2	aPF14_0419_2::PF14_0419::hypothetical protein	1.22336	1.2167	1.18713	1.34795	1.06002	1.27415	1.04344	1.50605	1.2127	1.34388	0.940744	0.883024	0.926554	0.800165	0.880155
aMAL13P1.305_0	aMAL13P1.305_0::MAL13P1.305::hypothetical protein	0.409554	0.653349	0.608618	0.793372	1.02331	0.368723	0.326474	0.39997	0.471685	0.872253	0.912039	1.10567	0.711399	0.672727	0.632295
aPF11_0165_0	aPF11_0165_0::PF11_0165::falcipain 2 precursor	0.630899	0.538901	0.359935	0.41104	0.636317	0.731107	0.755372	0.476211	0.387608	0.442466	0.694141	0.745916	0.749572	0.624937	0.786575
aPFL0115w_0	aPFL0115w_0::PFL0115w::hypothetical protein	0.583184		0.944993	0.583285	0.611844	0.769141	0.750251	0.695549	0.678314	1.02693	0.575407	0.640255	0.598038	0.631064	0.634824
aMAL8P1.45_1	aMAL8P1.45_1::MAL8P1.45::hypothetical protein	0.401602	0.497789	0.374333	0.437138	0.383932	0.443735	0.363603	0.355399	0.505885	0.721384	0.944659	0.958496	0.928868	1.05259	1.07364
aPFL0785c_0	aPFL0785c_0::PFL0785c::signal recognition particle 19 kd protein, putative	1.05238	0.873354	0.768298	0.551968	0.610314	0.796611	1.13562	1.07323	0.72819	1.00284	0.96423	1.12831	1.27705	1.18983	1.50992
aPFC0060c_0	aPFC0060c_0::PFC0060c::Serine/threonine protein kinase, putative	1.08287	1.2467	1.19368	0.927776	0.78163	0.600099	1.23804	1.23158	1.02032	1.11948	0.734589	0.650318	0.679011	0.747474	0.837159
aPFE0355c_0	aPFE0355c_0::PFE0355c::serine protease belonging to subtilisin family, putative	2.22803	2.36561	3.15172	3.18262	3.46762	2.87372	3.37357	3.82142	4.04851	3.53719	2.01719	1.9497	1.71083	1.83928	1.55292
aMAL13P1.218_0	aMAL13P1.218_0::MAL13P1.218::UDP-N-acetylglucosamine pyrophosphorylase, putative	0.565954	0.802241	0.479041	0.383637	0.376284	0.662434	0.579972	0.392933	0.359107	0.464018	0.824619	0.798747	0.616546	0.643318	0.720816
aPF11_0439_0	aPF11_0439_0::PF11_0439::hypothetical protein	1.00069	0.874465	0.747356	0.627652	0.593488	1.08081	0.92181	0.79173	0.749565	0.727723	1.21083	1.15724	1.1232	1.08322	1.2178
ac11rRNA28s_1	ac11rRNA28s_1::c11rRNA28s::	0.637527	0.626681	0.729032	0.711165	0.827518	0.891697	1.03448	0.726046	0.825092	0.645315	0.400567	0.462896	0.316949	0.278158	0.270622
aPF14_0710_6	aPF14_0710_6::PF14_0710::hypothetical protein	0.880078		1.15572	1.18484	1.37359	0.721598	1.01015	1.0486	0.899193	1.68112	0.635426	0.825162	0.72528	0.689882	1.05846
aPFF0680c_0	aPFF0680c_0::PFF0680c::thiamin-phosphate pyrophosphorylase, putative	1.69521	1.69337	1.61905	1.52542	1.9839	1.66189	1.91404	1.84854	2.05632	1.88143	1.42351	1.49686	1.61135	1.64567	1.7856
aPF11_0079_1	aPF11_0079_1::PF11_0079::hypothetical protein	1.55472	1.3767	1.36775	1.34012	1.55714	1.61646	1.36991	1.28319	1.3267	1.27922	1.76014	1.59624	1.52112	1.29889	1.48336
aMAL13P1.81_0	aMAL13P1.81_0::MAL13P1.81::hypothetical protein, conserved	0.889356	0.85002	1.1387	1.80466	1.73305	0.793441	0.750251	0.849203	1.32528	1.15371	0.751552	0.854093	0.776177	0.858982	0.867509
aPF14_0686_0	aPF14_0686_0::PF14_0686::hypothetical protein	0.889356	0.784463	0.445011	0.47498	0.463472	0.776537	0.573571	0.531339	0.400433	0.442466	1.04382	1.01007	0.955473	0.939857	0.996497
aPF10_0211_5	aPF10_0211_5::PF10_0211::hypothetical protein	0.5527	0.607792	2.08631	5.22217	5.29857	0.492335	0.61454	1.09083	1.64876	1.90425	0.267479	0.238995	0.182766	0.205862	0.187159
aMAL13P1.135_0	aMAL13P1.135_0::MAL13P1.135::snare protein homologue, putative	1.39964	1.36003	1.99731	1.74072	1.40571	1.30268	1.75912	1.75588	2.00787	1.55307	0.82201	0.723275	0.696362	0.710713	0.723346
aPF14_0285_0	aPF14_0285_0::PF14_0285::exodeoxyribonuclease III, putative	1.48977	1.54226	0.909654	0.914727	0.887173	1.16111	1.26493	1.01928	0.696839	1.1461	0	1.81636	1.58243	1.63709	1.87033
aPFC0820w_7	aPFC0820w_7::PFC0820w::hypothetical protein	0.833689	1.05336	2.48944	3.66413	4.50776	0.665603	1.04472	2.13826	2.72038	3.33307	0.380995	0.333335	0.276463	0.292863	0.285797
aMAL8P1.86_0	aMAL8P1.86_0::MAL8P1.86::hypothetical protein	1.24324	0.927799	0.613853	0.672018	0.648554	1.13469	1.00503	0.649805	0.646963	0.500785	1.10384	0.950949	0.955473	0.974167	0.963618
aPF14_0512_1	aPF14_0512_1::PF14_0512::hypothetical protein	0.983461	0.743351	0.905728	0.932996	0.836696	0.704694	0.78994	0.877354	1.08302	0.976214	0.756771	0.740885	0.830544	0.916575	0.87889
aPF10_0157_0	aPF10_0157_0::PF10_0157::hypothetical protein	0.230623	0.290007		0.750311	0.489475	0.253563	0.117787	0	0.250805	0.537551	0.366642	0.303146	0.424526	0.529359	0.538715
aPF08_0098_0	aPF08_0098_0::PF08_0098::abc transporter, putative	1.16637	1.0478	0.794475	0.743787	0.671498	1.27838	0	0.877354	0.746715	0.896342	1.73274	1.85913	1.46444	1.99245	1.98288
aPFL2405c_1	aPFL2405c_1::PFL2405c::PFG377 protein	0.580534	0.795574			1.0799	0	0	0	0	1.06496	0.660217	0.813841	0	0	0
aPFD0615c_1	aPFD0615c_1::PFD0615c::erythrocyte membrane protein 1 (PfEMP1)	0.0835014					0.0866341	0.0640146	0.140752	0	0	0.0365338	0.0716985	0	0	0
aPF14_0031_4	aPF14_0031_4::PF14_0031::hypothetical protein	1.70847	1.82449	1.6557	1.64677	1.50055	1.79079	1.923	2.09603	2.09479	1.68238	2.40079	2.54467	2.2464	2.31104	2.0069
aPF11_0098_0	aPF11_0098_0::PF11_0098::endoplasmic reticulum-resident calcium binding protein	2.90532	2.46339	1.99077	1.3336	1.19768	2.88851	2.94851	2.06202	1.62026	1.48207	2.69175	2.50945	2.04976	1.98387	1.97529
aMAL13P1.39_3	aMAL13P1.39_3::MAL13P1.39::hypothetical protein	2.27574	1.83893	1.65308	1.39493	1.10132	2.21868	2.68989	2.29426	2.05774	1.94482	2.18159	2.01762	1.89938	2.01695	2.48365
aPFC0790w_1	aPFC0790w_1::PFC0790w::hypothetical protein	0.984786	0.741128	0.611235	0.468455	0.428291	0.86951	0.651669	0.553624	0.49021	0.382879	1.02164	1.03145	1.02835	1.03911	1.09513
aPF14_0634_0	aPF14_0634_0::PF14_0634::hypothetical protein	0.279663	0.334452	0.265698	0.238795	0.284507	0.310615	0.236854	0.361263	0	0.267508	0.275308	0	0.219782	0.220566	0.279474
aMAL7P1.134_4	aMAL7P1.134_4::MAL7P1.134::hypothetical protein	1.63689	1.4467	1.06279	0.906898	1.03555	1.49285	1.62725	0.992301	0.73104	0.782239	1.27216	1.16227	0.949689	0.892067	1.14825
aPF11_0083_1	aPF11_0083_1::PF11_0083::nucleic acid binding factor, putative	1.4911	2.13783	2.21458	1.89992	1.61986	1.78022	1.81673	2.46081	2.6249	2.52928	1.6401	1.639	1.47023	1.44593	1.29368
aPFD1045w_1	aPFD1045w_1::PFD1045w::	2.62168	2.86562	2.51038	1.85816	1.61986	2.0116	2.35958	2.44908	1.3096	1.88777	2.30163	2.02391	1.60672	1.19963	1.33667
aPFD1060w_2	aPFD1060w_2::PFD1060w::u5 small nuclear ribonucleoprotein-specific protein, putative	1.20348	0.993356	1.0052	0.823385	0.735742	1.62492	1.45313	1.24096	1.20985	0.90902	1.54877	1.45032	1.37653	1.36873	1.34173
aPF13_0013_0	aPF13_0013_0::PF13_0013::PBS lyase HEAT-like repeat domain protein	0.706448	0.336675	0.51438	0.514126	0.677617	0.4786	0.565889	0.540722	0.24653	0.541355	0.64195	0.597488	1.06189	1.14694	0.873832
aPFD0535w_0	aPFD0535w_0::PFD0535w::hypothetical protein	1.24589	1.57337	2.13998	2.52105	2.52385	1.81403	1.59652	2.8209	3.50842	3.45225	1.77711	1.82391	2.3054	2.43113	2.21177
aPF10_0273_0	aPF10_0273_0::PF10_0273::hypothetical protein	1.02455	1.26336	0.844211	0.785543	0.954476	0.881132	0.52492	0.518436	0.527261	0.712509	1.04382	0.849062	0.716026	0.704586	0.734727
aPF07_0015_1	aPF07_0015_1::PF07_0015::hypothetical protein	0.361839	0.484456	0.327214	0.245319	0.316629	0.507126	0.560768	0.456271	0.369083	0.533748	1.26563	1.17485	1.47717	1.39569	1.48716
aPF14_0184_1	aPF14_0184_1::PF14_0184::hypothetical protein	2.06235	2.00782	1.56016	1.31141	1.2864	2.3032	1.98061	2.01627	1.69721	1.57969	2.74264	0	2.80974	3.06219	2.96546
aPF13_0189_1	aPF13_0189_1::PF13_0189::hypothetical protein	0.937071	1.14114	0.985568	0.625042	0.711268	1.35445	0.887242	1.12602	1.0645	0.981285	2.05763	2.14089	2.0058	2.13827	2.04737
aPFL0935c_3	aPFL0935c_3::PFL0935c::erythrocyte membrane protein 1 (PfEMP1)	0.53812	0.531123	0.344229	0.444967	0.43135	0.63919	0.541564	0.665053	0.443184	0.424716	0.533654	0.55472	0.388667	0.272031	0.378112
aPFI1085w_2	aPFI1085w_2::PFI1085w::ubiquitin-like protein, putative	0.873451	0.727795	0.624324	0.491943	0.544541	0.791328	0.871879	0.68382	0.595662	0.557836	1.28651	1.42642	1.33951	1.43245	1.4606
aPF11_0262_1	aPF11_0262_1::PF11_0262::hypothetical protein	2.40696	1.00225	1.72638	1.40015	1.19615	1.48546	1.36095	1.75705	1.67583	1.22344	1.42743	1.46039	1.96184	1.94588	1.66041
aPF14_0530_1	aPF14_0530_1::PF14_0530::ferlin, putative	1.53086	1.94116	2.59808	2.27703	2.28982	1.39988	1.61573	2.80917	3.8889	3.50296	1.37784	0	1.25044	1.2658	1.22033
aPF10_0111_0	aPF10_0111_0::PF10_0111::20S proteasome beta subunit, putative	2.08621	1.97116	2.16877	1.82554	1.4929	0.962483	2.33141	2.34117	1.33525	1.76606	1.9128	1.83397	1.81956	1.66037	1.61741
aMAL13P1.336_1	aMAL13P1.336_1::MAL13P1.336::hypothetical protein	0.990088	0.912243	0.791857	0.627652	0.634788	1.16639	1.25597	0.968843	0.846467	0.742937	1.75884	1.90567	1.62523	1.62239	1.73375
aPF13_0189_0	aPF13_0189_0::PF13_0189::hypothetical protein	1.64219	1.44226	1.14001	0.913422	0.749508	1.42735	1.64261	1.1788	1.07447	1.10426	2.20768	2.45788	2.64895	2.77791	2.64046
aPF08_0027_1	aPF08_0027_1::PF08_0027::hypothetical protein	0.646804		0.371715	0.366674	0.377813	0.571574	0.512117	0.492632	0.397583	0.418377	0.893772	0.859125	0.914987	0.988871	0.97247
aPFL0110c_0	aPFL0110c_0::PFL0110c::PfmpC	2.23598	2.07449	1.7146	1.37274	1.3017	2.20917	2.93187	2.40451	2.51375	1.97271	1.91933	1.76102	1.42627	1.37731	1.48716
aPFF0685c_0	aPFF0685c_0::PFF0685c::Hypothetical protein	1.02322	1.06558	0.955464	0.991716	1.16097	0.854719	0.877	0.631038	0.718215	0.68335	1.41829	1.4063	1.2944	1.27806	1.22665
aMAL13P1.162_0	aMAL13P1.162_0::MAL13P1.162::DNAJ-like protein, putative	0.686567	0.841131	0.837667	0.721604	0.680676	0.961427	0.729766	0.832782	0.772366	0.644048	0.622379	0.759753	0.991332	0.915349	1.10399
aPF11_0447_0	aPF11_0447_0::PF11_0447::translation initiation factor eIF-1A, putative	1.48845	0.87002	0.732959	0.557188	0.647025	0.911771	1.15226	0.876181	0.665489	0.859575	1.02686	0.891829	0.930025	0.943533	0.685408
aPF14_0759_0	aPF14_0759_0::PF14_0759::hypothetical protein	2.6959	3.26785	1.91355	1.43799	1.24051	2.88322	2.07919	0	0	1.08398	2.3486	2.4302	3.20419	2.94456	3.23229
aPF08_0099_0	aPF08_0099_0::PF08_0099::hypothetical protein, conserved	1.86486	1.80338	1.27875	0.99824	0.825989	1.67986	1.58628	1.27967	0.589962	0.708706	0.814181	0.78491	0.776177	0.683755	0.809338
aPF11_0526_0	aPF11_0526_0::PF11_0526::hypothetical protein	0.576557	0.754462	0.561499	0.433223	0.405346	0.562065	0.583813	0.519609	0.51016	0.483036	0.930306	1.24026	1.38578	1.45329	1.36955
aPF10_0374_8	aPF10_0374_8::PF10_0374::gene 11-1 protein precursor	0.652106	0.4889	0.654428	0.652444	0.764804	0.458527	0.284225	0.531339	0	0.377807	0.421443	0.623903	0.499715	0.450935	0.484338
aPFB0755w_0	aPFB0755w_0::PFB0755w::hypothetical protein	2.79663	2.13561	2.2617	1.68983	1.55561	2.25143	2.45304	2.03152	1.98222	2.40504	5.00252	5.03902	5.58015	5.87809	6.32295
aPF10_0089_1	aPF10_0089_1::PF10_0089::hypothetical protein	0.424134	0.441121	0.437158	0.414955	0.364047	0.370836	0.463466	0.418737	0.443184	0.37654	0.390128	0.378619	0.393294	0.430104	0.480544
aPFF0220w_2	aPFF0220w_2::PFF0220w::hypothetical protein, expressed	0.218694	0.246672	0.202873	0.275332	0.318159	0.291598	0.225331	0.588812	0.212329	0.349916	0.225726	0.202517	0.638524	0.36761	0.266828
aPF07_0062_1	aPF07_0062_1::PF07_0062::GTP-binding translation elongation factor tu family protein, putative	1.3294	1.25447	0.989494	0.781628	0.617962	1.28472	1.05368	0.97588	0.950494	0.780971	2.19463	2.30693	2.14114	2.338	2.275
aPFE0170c_1	aPFE0170c_1::PFE0170c::protein kinase, putative	0.662709	0.657793	1.06541	1.11568	1.16097	0.633908	0.541564	0.864452	0.789466	0.897609	0.751552	0.720759	0.62927	0.665374	0.676556
aPF08_0095_1	aPF08_0095_1::PF08_0095::dihydropteroate synthetase	0.783323	0.570013	0.439775	0.381028	0.341103	0.66349	0.660631	0.441023	0.356257	0.328363	0.841581	0.80252	0.687108	0.738896	0.78531
aPFF0200c_0	aPFF0200c_0::PFF0200c::hypothetical protein	2.32611	2.76673	2.70933	3.01821	2.49479	2.67615	4.39524	5.51865	5.30111	6.02337	2.99838	2.65536	3.33143	3.17125	3.23229
aPF08_0091_0	aPF08_0091_0::PF08_0091::hypothetical protein	3.02461	3.08007	3.89515	3.81158	3.58999	2.56733	3.03557	3.23612	3.42577	3.3673	1.37654	1.24403	1.25507	1.14939	1.21021
aPF07_0043_0	aPF07_0043_0::PF07_0043::60S ribosomal protein L34-a, putative	1.87414	1.25114	1.05625	0.725518	0.686794	1.09666	1.3187	0.948903	0.396158	0.669404	1.56312	1.71951	1.98845	1.1543	1.87286
aMAL7P1.122_1	aMAL7P1.122_1::MAL7P1.122::conserved GTP-binding protein, putative	0.771394	0.817797	0.545793	0.443662	0.458883	0.819854	0.955098	0.571218	0.446034	0.412038	0.802438	0.899376	0.81088	0.6666	0.809338
aPF10_0083_0	aPF10_0083_0::PF10_0083::hypothetical protein	0.613669	0.675571	0.256536	0.687677	0.487945	0.603269	0.298308	0.709624	0.681164	0.788578	0.394043	0.57233	0.498558	0.5024	0.644941
aPF07_0086_1	aPF07_0086_1::PF07_0086::hypothetical protein	1.99608	1.91671	2.05098	1.21746	1.33535	1.61013	1.88971	1.61982	1.70006	1.74324	1.51224	2.27926	1.9711	1.97529	2.0499
aPF07_0069_0	aPF07_0069_0::PF07_0069::hypothetical protein	1.30421	0.646682	1.64523	2.14132	1.66116	1.40199	1.40192	1.73946	1.85966	1.8827	1.09732	1.47674	1.59515	1.77066	1.77928
aPFF1090c_1	aPFF1090c_1::PFF1090c::hypothetical protein	1.5693	1.60004	0.667516	0.722909	0.842815	1.74853	1.08953	0.812843	0.629863	0.863379	1.24345	0.911955	0.968197	0.733995	1.08249
aPFI0165c_1	aPFI0165c_1::PFI0165c::DEAD/DEAH box helicase, putative	0.93442	0.735573	0.564116	0.514126	0.538422	0.695186	0.79122	0.636903	0.406133	0.457679	1.10384	1.03774	0.918457	0.919025	0.961088
aPFD0485w_0	aPFD0485w_0::PFD0485w::hypothetical protein	0.803204	0.778907	0.989494	1.34143	1.48066	0.721598	0.814266	1.13775	1.51338	1.51377	0.862458	0.84403	0.813193	0.889616	0.819454
aPF14_0155_0	aPF14_0155_0::PF14_0155::hypothetical protein	0.526191	1.20114	1.25912	0.872971	1.50819	0.485996	0.562048	0.89964	1.13717	2.37588	0.739809	0.748432	0	0.555091	0.585505
aPFI0790w_0	aPFI0790w_0::PFI0790w::thioredoxin, putative	2.43612	2.12783	1.94496	2.52235	2.17052	1.82248	1.75912	1.99281	1.60601	2.19078	1.79668	1.52454	1.41354	1.31604	1.42899
aPF13_0176_0	aPF13_0176_0::PF13_0176::apurinic/apyrimidinic endonuclease Apn1	2.70253	2.14783	1.72638	1.55151	1.47454	2.89696	2.78464	2.19573	0	2.18444	2.12287	2.05913	2.20476	2.13949	2.15486
aMAL13P1.32_3	aMAL13P1.32_3::MAL13P1.32::hypothetical protein		0.871131	0.727723	0.484114	0.682206	0.617004	0.405853	0.661534	0.618463	0.679546	0.610636	0.694344	0.586471	0.606557	0.719552
aPFI0095c_1	aPFI0095c_1::PFI0095c::hypothetical protein	0.622947	0.563346	0.420142	0.404516	0.497123	0.648699	0.523639	0.482075	0.434634	0.502053	0.597588	0.608809	0.626957	0.595528	0.638618
aPFL1225c_0	aPFL1225c_0::PFL1225c::hypothetical protein	0.499683	0.456677	0.590294	0.489333	0.575133	0.534596	0.605578	0.566527	0.456009	0.576854	0.635426	0.715727	0.776177	0.756051	0.859921
aPFE1555c_3	aPFE1555c_3::PFE1555c::hypothetical protein	2.22273	2.17672	2.56274	2.29791	1.9839	2.23558	3.02149	3.37336	4.07131	3.71215	1.58008	1.35976	1.04801	1.01951	1.08249
arps17_0	arps17_0::rps17::	0.296894		0.831123	0.503687	1.04625	0	0	0	0	0.129317	#N/A	#N/A	#N/A	#N/A	#N/A
aMAL13P1.137_2	aMAL13P1.137_2::MAL13P1.137::hypothetical malaria antigen	2.2267	2.63339	2.13343	1.58935	2.04509	1.68831	2.56442	3.10475	2.74461	3.54099	2.85746	2.69813	2.87799	2.70438	2.97432
aPF13_0151_0	aPF13_0151_0::PF13_0151::hypothetical protein	1.40097	1.19558	0.964626	0.889934	0.903999	1.41784	1.62853	1.25387	1.10012	1.12582	1.45483	1.12328	1.26085	1.30134	1.40117
aPF14_0399_0	aPF14_0399_0::PF14_0399::ADP-ribosylation-like factor, putative	0.646804	0.540013	0.520924	0.497163	0.451235	0.702581	0.558207	0	0.424659	0.470357	0.681094	0.61384	0.674384	0.758502	0.735991
aPF10_0131_0	aPF10_0131_0::PF10_0131::hypothetical protein	0.550049	0.671127	0.836358	1.65068	2.60492	0.557839	0.633745	0.658015	0.75954	1.12201	0.686313	0.763526	0.655876	0.681304	0.700583
aPF14_0080_0	aPF14_0080_0::PF14_0080::hypothetical protein	0.311473	0.240006	0.405745	0.323612	0.318159	0.297937	0.30471	0.301444	0.423234	0.687153	0.459282	0.562267	0.739161	0.78301	0.944649
aPF14_0370_1	aPF14_0370_1::PF14_0370::RNA helicase, putative	0.860197	1.08225	0.900492	0.730738	0.570544	0.719485	0.628623	0.814016	0.822242	0.737865	1.10254	1.10692	1.34067	0	1.29115
aPF11_0289_2	aPF11_0289_2::PF11_0289::hypothetical protein	1.31349	1.44892	1.3887	1.04913	0.877996	1.34388	0.947416	1.27146	1.01747	0.938179	1.42221	1.6541	1.58706	1.46309	1.45934
aPFL2465c_0	aPFL2465c_0::PFL2465c::thymidylate kinase, putative	2.29828	2.60228	1.54838	1.55151	1.3843	1.84045	2.35702	1.46969	1.50911	1.88777	2.102	2.01259	1.08156	1.13469	1.20895
aPFB0130w_0	aPFB0130w_0::PFB0130w::polyprenyl synthetase, putative	1.30289	0.760018	0.969862	0.812946	0.755627	1.07025	0.760493	0.79173	1.0474	0	1.17821	1.32831	1.57433	1.56357	1.56556
aPFF1125c_0	aPFF1125c_0::PFF1125c::RNA-binding protein mei2 homologue, putative	0.880078	0.830019	0.897875	0.558492	0.628669	0.832532	0.975583	0.745985	0.98612	1.01552	1.29825	1.55598	1.78486	2.11376	2.08152
aPFB0435c_1	aPFB0435c_1::PFB0435c::hypothetical protein	1.93776	2.27005	2.41746	2.21701	1.93343	2.19226	2.48633	3.35459	3.42149	2.97935	2.30554	2.3824	2.57376	2.05004	2.58735
aMAL7P1.100_1	aMAL7P1.100_1::MAL7P1.100::serine/threonine protein kinase 2, putative	0.554025	1.04336	1.19891	0.424089	0.659261	0.59376	0.485231	0.541895	0.605637	0.778435	0.442319	0.625161	0.753042	0.757277	0.799221
aPF10_0385_0	aPF10_0385_0::PF10_0385::PfEMP-1, truncated, putative	0.148447		0.175387	0.130489	0.142254	0.120442	0	0.129023	0	0.14453	0.151354	0.17107	0	0.111508	0.207393
aPF08_0130_0	aPF08_0130_0::PF08_0130::wd repeat protein, putative	0.373768	0.378898	0.455482	0.455406	0.510889	0.383514	0.281664	0.33194	0.296406	0.327095	0.490596	0.573588	0.439564	0.517105	0.407198
aPFL1785c_1	aPFL1785c_1::PFL1785c::hypothetical protein	1.63822	2.45783	3.07712	3.13956	3.32384	1.63443	1.82826	2.59687	3.71505	3.75525	0.977278	0.64906	0.539044	0.501175	0.469163
aPF14_0333_0	aPF14_0333_0::PF14_0333::hypothetical protein	1.40362	1.40559	1.11907	1.33882	1.56632	1.22767	1.37759	2.07257	2.70328	3.30898	1.34523	1.21636	1.1232	0.996223	1.00914
aPFB0540w_1	aPFB0540w_1::PFB0540w::hypothetical protein	1.81582	1.53004	1.28791	0.823385	0.982009	1.79185	2.04335	1.68081	1.83686	1.55433	2.18159	2.6541	2.72877	2.94456	2.80486
aPF11_0236_0	aPF11_0236_0::PF11_0236::hypothetical protein	1.06034	1.67115	2.12296	1.55151	1.87377	1.17167	0	1.23275	1.68438	1.26781	0.638036	0.86164	0.784274	0.537936	0.700583
aMAL8P1.82_0	aMAL8P1.82_0::MAL8P1.82::hypothetical protein	1.95897	1.9056	2.31013	1.85555	1.94107	1.99787	2.65789	2.88776	3.15359	3.6272	2.38774	2.81008	2.79586	2.87594	3.03122
aPF11_0336_0	aPF11_0336_0::PF11_0336::hypothetical protein, conserved	1.33735	1.1178	1.06279	0.739872	0.777041	1.15899	1.32894	1.19756	0.981845	1.04341	1.5566	1.54718	1.38231	1.21189	1.46313
aPFC0885c_0	aPFC0885c_0::PFC0885c::hypothetical protein	1.12263		0.73165	0.666798	0.726564	1.01108	0.994787	0.833955	0.755265	0.792381	1.27607	1.27296	1.31985	1.65425	1.54406
aPFE1255w_1	aPFE1255w_1::PFE1255w::hypothetical protein	2.1273	1.89449	1.9358	1.86991	1.35523	1.90067	2.25844	2.04442	1.77701	1.68238	1.98848	1.91699	1.73743	1.74002	1.66294
aPF14_0657_0	aPF14_0657_0::PF14_0657::hypothetical protein	0.572581		0.681913	0.5872	0.604196	0.5029	0.459625	0.616963	0.50731	0.535016	0.563664	0.432707	0.588784	0.574697	0.599416
aPFB0960c_0	aPFB0960c_0::PFB0960c::hypothetical protein	0.231948	0.315563	0.286639	0.215307	0.256974	0	0.297028	0.287369	0.171003	0.253562	0.233555	0.296857	0.217468	0.186256	0.318677
aPF10_0067_0	aPF10_0067_0::PF10_0067::hypothetical protein	0.638852	0.590014	0.706782	0.652444	0.717387	0.546217	0.485231	0.505534	0.520136	0.580657	0.782866	0.842772	0.732221	0.708262	0.753696
aPF14_0056_0	aPF14_0056_0::PF14_0056::hypothetical protein	0.905261	0.687794	0.554955	0.563712	0.621021	0.737446	0.750251	0.776482	0.597087	0.638976	1.20431	1.22139	1.07346	1.07097	0.976263
aPF14_0495_1	aPF14_0495_1::PF14_0495::hypothetical protein	1.93644	2.64562	4.24723	4.34267	5.08136	1.7274	2.18418	3.87537	5.27118	5.19929	0.995545	0.745916	0.552925	0.48402	0.423638
aPF14_0110_0	aPF14_0110_0::PF14_0110::hypothetical protein	0.636201	0.574458	1.19368	2.20526	2.68599	0.581082	0.647828	0.988783	1.46778	1.59237	0.55453	0.510695	0.48699	0.49995	0.503307
aMAL13P1.259_0	aMAL13P1.259_0::MAL13P1.259::hypothetical protein	0.124589			0.274027	0.42982	0.125725	0	0	0.138228	0.211724	0.263565	0.210064	0.235976	0.2512	0.297179
aPFD0585c_2	aPFD0585c_2::PFD0585c::hypothetical protein	1.64219	1.51448	1.39393	1.10263	1.0386	1.64076	1.40448	1.66322	1.22267	1.19554	1.88932	1.89058	1.98035	1.99245	2.10301
aPFD0020c_3	aPFD0020c_3::PFD0020c::erythrocyte membrane protein 1 (PfEMP1)	0.0371117	0.0633348	0.0170151	0.0247929		0.0707864	0.0371285	0.0387068	0.0171003	0	0.023486	0.0893087	0.013881	0	0.0392023
aPF14_0320_1	aPF14_0320_1::PF14_0320::hypothetical protein	2.86025	3.34119	2.89911	1.13395	1.21145	3.03114	3.14312	2.40099	1.79981	2.63958	2.23378	2.52454	2.31696	2.63086	2.60379
aPF08_0005_0	aPF08_0005_0::PF08_0005::hypothetical protein	0.178932	0.0900021	0.142665	0.151367	0.159079	0.15742	0.136991	0.0985264	0.172429	0.167351	0.113516	0.11824	0.156161	0.204636	0.244066
aPF11_0396_1	aPF11_0396_1::PF11_0396::Protein phosphatase 2C	0.226647	0.931133	1.43974	0.815556	1.21451	0.566291	0.563328	1.28202	0.293556	1.71535	0.998154	1.33334	1.26664	1.5942	1.21906
aPFI1345c_0	aPFI1345c_0::PFI1345c::hypothetical protein	0.311473		0.299728	0.625042	0.614903	0.271524	0.171559	0.473865	0.595662	0.394289	0.260955	0	0.381727	0.441132	0.565272
aPF13_0330_1	aPF13_0330_1::PF13_0330::ATP-dependent DNA helicase, putative	0.718377	0.775574	0.625633	0.527175	0.42982	0.718429	0.56973	0.543068	0.49021	0.595871	0.929001	1.1434	1.05611	1.05872	1.16595
aPF14_0649_0	aPF14_0649_0::PF14_0649::hypothetical protein	2.86423	2.57895	2.55619	1.98735	1.8753	2.88217	3.17897	3.30063	3.32887	3.07444	2.14375	2.06919	2.13767	2.21669	2.28511
aPF14_0402_3	aPF14_0402_3::PF14_0402::hypothetical protein	1.41952	1.33114	1.5222	1.57892	1.53573	1.36079	1.62853	2.07726	2.49808	2.33023	1.77058	2.05284	2.21633	2.39314	2.14727
aPFF1365c_0	aPFF1365c_0::PFF1365c::null	1.25782	1.90671	4.2132	5.13213	4.77238	1.40728	2.02798	3.86481	6.30005	5.55681	0.660217	0.895603	1.0295	0.927603	1.10399
aMAL13P1.200_0	aMAL13P1.200_0::MAL13P1.200::hypothetical protein, conserved	0.554025	0.595569	0.441084	0.358844	0.334984	0.552556	0.244536	0.207609	0.26078	0.31822	0.93422	1.16227	1.16716	1.00848	1.33541
ac11rRNA18s_0	ac11rRNA18s_0::c11rRNA18s::	1.09612	0.99669	1.10206	1.33751	1.50361	1.07025	1.17787	0.924271	0.950494	0.921698	0.541482	0.504405	0.38057	0.392117	0.319941
aMAL8P1.92_1	aMAL8P1.92_1::MAL8P1.92::ATPase, putative	0.565954	0.512234	0.435849	0.330137	0.419113	0.507126	0.48011	0.401143	0.287856	0.384146	0.969449	0.993717	0	0.873687	0.964882
aPFI0240c_3	aPFI0240c_3::PFI0240c::E1-E2_ATPase/hydrolase, putative	1.96029	1.82115	1.50649	1.04391	1.05237	2.1405	2.01646	1.90132	1.60173	1.27542	2.55606	2.67297	2.58764	2.49975	2.48365
aPFA0320w_0	aPFA0320w_0::PFA0320w::hypothetical protein	1.67798	1.48337	1.0942	1.04522	0.972831	1.63654	1.46465	1.44153	1.1671	1.1854	1.9402	1.7497	1.85542	2.05862	1.95506
aPF14_0088_0	aPF14_0088_0::PF14_0088::hypothetical protein	2.28767	1.9956	1.56932	1.1483	1.00495	1.40939	1.49026	1.59988	0.990395	1.05735	2.72959	2.71825	2.42686	2.71664	2.61897
aMAL8P1.33_1	aMAL8P1.33_1::MAL8P1.33::GTP-binding protein, putative	1.23794	1.49781	1.69889	1.6024	1.48984	1.83939	1.55171	2.20277	2.13042	2.1033	1.28781	0.900634	1.30481	0.814869	1.26459
aPF14_0360_1	aPF14_0360_1::PF14_0360::hypothetical protein	1.07624	0.900021	0.874315	0.777714	0.691383	0.931844	0.979423	1.03805	1.13147	1.16131	1.80451	1.5673	1.64374	1.65057	1.53774
aPFL0105w_1	aPFL0105w_1::PFL0105w::hypothetical protein	1.08022	0.9478	0.897875	0.818165	0.848933	0.794498	0.892364	1.00755	0.939094	0.978749	0.893772	0.715727	0.653562	0.789136	0.729668
aPF10_0184_2	aPF10_0184_2::PF10_0184::hypothetical protein	1.75618	1.92671	2.11511	1.8947	2.03744	1.67563	2.21362	2.9511	0	3.64369	1.99892	1.65158	1.7062	1.69713	1.59085
aPFF0130c_1	aPFF0130c_1::PFF0130c::hypothetical protein	0.194837	0.210005			0.237089	0.148968	0.0742569	0.206436	0.165303	0	0.241384	0.260379	0.2915	0.281834	0.316148
aPFL1980c_1	aPFL1980c_1::PFL1980c::hypothetical protein	1.64485	1.14114	1.0497	0.608078	0.513949	1.38615	1.45313	1.10256	0.896343	0.761954	1.62575	1.85033	1.66803	1.77311	1.71858
aPFA0655w_0	aPFA0655w_0::PFA0655w::hypothetical protein	0.365816	0.657793		0.377113	0.328866	0.554669	0.252218	0.591158	0.423234	0.283989	0.377081	0.436481	0.24523	0.187481	0.252918
aMAL13P1.296_4	aMAL13P1.296_4::MAL13P1.296::hypothetical protein	2.62168	2.9734	3.1779	3.2831	4.26149	2.67192	3.18025	3.86247	4.17534	4.67061	2.20899	2.29938	2.06595	2.03656	2.04484
aPFI1400c_0	aPFI1400c_0::PFI1400c::hypothetical protein	0.510286	0.456677	0.450246	0.41365	0.341103	0.576856	0.399451	0.560662	0.438909	0.436127	0.374471	0.494343	0.512439	0.522006	0.593093
aPFD0425w_0	aPFD0425w_0::PFD0425w::hypothetical protein		0.337786	0.256536	0.220526	0.458883	0.140516	0.106264	0.225203	0.304956	0.472893	0.468415	0.449059	0.374786	0	0.413521
aPFL1135c_0	aPFL1135c_0::PFL1135c::hypothetical protein	1.68063	1.65782	1.38477	0.906898	0.963654	1.83516	1.247	1.52012	1.03315	1.15751	2.28075	2.28052	2.86989	2.57572	2.58229
aPFL1580w_1	aPFL1580w_1::PFL1580w::hypothetical protein	4.8285	3.46675	4.52733	7.25518	8.59181	3.06494	3.81399	4.07125	4.63134	3.94542	2.33294	2.21511	2.02662	1.85398	1.95885
aPFE1270c_1	aPFE1270c_1::PFE1270c::hypothetical protein	0.530168	0.444455	0.408363	0.396686	0.426761	0.418379	0.453223	0.302617	0.359107	0.371468	1.18865	1.0956	1.0723	1.10651	1.30253
aPF08_0107_1	aPF08_0107_1::PF08_0107::erythrocyte membrane protein 1 (PfEMP1)	0.515588	0.52779	0.33114	0.29621	0.304392	0.671942	0.48139	0.541895	0.421809	0.433591	0.630207	0.633966	0.470796	0.620036	0.613326
aPF13_0265_0	aPF13_0265_0::PF13_0265::hypothetical protein	1.30686	1.17558	0.999965	1.27618	1.54949	1.17273	1.25341	1.39579	1.50626	1.92327	1.32565	1.24655	0.749572	1.05994	1.0142
aMAL13P1.320_1	aMAL13P1.320_1::MAL13P1.320::hypothetical protein	0.531493	0.57668		0.712469	0.777041	0.393023	0	0.443369	0	0.61362	0.610636	0	0.581844	0.604106	0.561478
aMAL13P1.460_0	aMAL13P1.460_0::MAL13P1.460::null	1.40627	1.34559	1.49995	1.30619	1.82023	1.12307	1.4877	1.18701	1.16995	1.26908	0.943354	1.18994	1.22962	0.711938	1.06731
ac5rRNA18s_0	ac5rRNA18s_0::c5rRNA18s::	0.652106	0.427788	0.726415	1.01781	0.695972	0.695186	0.815546	0.801113	0.723915	0.728991	0.253127	0.242769	0.282246	0.188707	0.175778
aPF07_0116_0	aPF07_0116_0::PF07_0116::hypothetical protein	0.91719	0.88002	1.14787	1.03086	0.870348	1.06708	1.19835	1.54475	1.64733	1.71154	0.733285	0.803778	1.53269	1.51946	1.45554
aPFL0075w_0	aPFL0075w_0::PFL0075w::XPA binding protein 1, putative	0.534144	0.438899	0.369097	0.361454	0.356399	0.588478	0	0.430466	0.389033	0.423449	0.598893	0.597488	0.728751	0.768305	0.758754
aPF11_0408_2	aPF11_0408_2::PF11_0408::hypothetical protein	1.97222	1.50559	1.41487	1.20311	0.994246	1.85207	1.83594	1.49784	1.60743	1.36543	1.66098	1.56102	1.47485	1.30747	1.69834
aMAL7P1.110_0	aMAL7P1.110_0::MAL7P1.110::hypothetical protein, conserved	1.73762	1.45337	1.27613	1.0935	1.17015	1.55624	1.1433	1.05329	0.866418	0.980017	1.91541	1.86668	1.68422	1.78168	1.81089
aMAL8P1.15_0	aMAL8P1.15_0::MAL8P1.15::hypothetical protein	1.20613	1.23003	0.99473	0.857312	0.770923	1.10723	0.929492	0.857414	0.75384	0.718848	1.05556	1.05661	0.979765	1.05994	1.01799
aPF13_0093_0	aPF13_0093_0::PF13_0093::hypothetical protein	0.389673	0.633348	0.493438	0.694201	0.520067	0.705751	0.316232	0.477384	0.649813	0.551497	0.476244	0.447801	0.370159	0.363934	0.435019
aPF14_0276_0	aPF14_0276_0::PF14_0276::ribosomal protein L15, putative	1.07226	1.07225	1.05363	0.836434	0.793867	1.13786	1.06392	1.27029	1.0417	0.796185	1.09601	0.947175	0.877971	0.905546	0.811867
aPF14_0621_0	aPF14_0621_0::PF14_0621::hypothetical protein	0.30087	0.282229	0.407054	0.597639	0.54607	0.365553	0.299588	0.425775	0.50161	0.508392	0.206155	0.172328	0.159631	0.159298	0.174513
aPFL2270w_0	aPFL2270w_0::PFL2270w::hypothetical protein	1.12263	1.02225	0.670134	0.790763	0.936121	1.33015	1.15226	0.85976	0.833642	0.817737	1.18082	1.00001	1.1394	1.29399	1.18492
aMAL8P1.151_1	aMAL8P1.151_1::MAL8P1.151::hypothetical protein, conserved	1.43808	1.70671	2.81142	3.30006	3.04851	1.69782	1.98189	2.33296	2.81016	2.49759	1.45222	1.50567	1.57318	1.91035	1.74893
aPFI0035c_0	aPFI0035c_0::PFI0035c::rifin	0.135193	0.110003	0.138739	0.165721	0.145313	0.166929	0.107545	0.153654	0.121127	0.134388	0.129173	0.133334	0.121458	0.107832	0.171984
aPFL0625c_0	aPFL0625c_0::PFL0625c::eukaryotic translation initiation factor 3 subunit 10, putative	0.933095	0.754462	0.458099	0.40843	0.443587	0.716316	0.938454	0.600542	0.595662	0.557836	1.01251	1.26793	1.31638	1.28051	1.40749
aPFL1325c_1	aPFL1325c_1::PFL1325c::hypothetical protein	1.15179	1.11669	1.10075	0.981276		1.43474	1.3315	1.30196	1.24548	1.00664	1.38437	1.56982	1.63911	1.72654	1.77169
aMAL13P1.256_2	aMAL13P1.256_2::MAL13P1.256::phosphatidylinositol transfer protein, putative	0.892007	0.955578	1.3743	1.50976	1.49749	0.675112	1.06264	1.28084	1.59318	1.406	0.630207	0.700633	0.601508	0.547739	0.692995
aPFL1585c_0	aPFL1585c_0::PFL1585c::hypothetical protein	0.715726	0.600014	0.586367	0.764665	0.824459	0.615947	0.485231	0.477384	0.448884	0.477964	0.532349	0.657865	0.746102	0.787911	0.794163
aMAL13P1.45_1	aMAL13P1.45_1::MAL13P1.45::hypothetical protein, conserved	1.70847	1.54004	1.31016	0.956484	1.01566	1.37981	1.55299	1.31017	1.32813	1.34261	2.17245	2.33964	1.87277	1.90177	2.00438
aPFE0375w_0	aPFE0375w_0::PFE0375w::cell differentiation protein rcd1, putative	1.33735	1.37225	1.70544	1.99126	2.08792	1.28155	1.70279	1.70544	1.94944	1.78001	1.94151	2.15096	2.27185	2.47524	2.38755
ac7rRNA5.8s_0	ac7rRNA5.8s_0::c7rRNA5.8s::	1.92981	1.40114	1.94234	2.1622	1.89519	0.456414	0.545404	0.430466	0.219454	0.285257	0.606721	0.511953	0.510125	0.366385	0.437548
aMAL7P1.95_0	aMAL7P1.95_0::MAL7P1.95::hypothetical protein	0.546073	0.614459	0.662281	0.887325	1.23745	0.606438	0.463466	0.795249	0.859292	1.20188	0.480158	0.544657	0.432623	0.415399	0.445136
aPFE1550w_1	aPFE1550w_1::PFE1550w::hypothetical protein	1.75088	2.29894	2.37819	1.71071	1.89213	1.43052	1.87563	2.3142	2.4482	2.43039	3.12103	2.93209	0	2.37966	2.31799
aMAL8P1.207_3	aMAL8P1.207_3::MAL8P1.207::	0.0384372					0.0338084	0	0.0363609	0	0	0.0365338	0.028931	0	0	0
aPF10_0299_1	aPF10_0299_1::PF10_0299::hypothetical protein, conserved	0.813807	0.642237	0.5026	0.520651	0.449705	0.790272	0.729766	0.702587	0.434634	0.583193	0.807657	0.724533	0.772707	0.88594	0.743579
aMAL7P1.50_0	aMAL7P1.50_0::MAL7P1.50::erythrocyte membrane protein 1 (PfEMP1)	0.0994064					0.18172	0	0.0832782	0	0	0	0.0779879	0	0	0
aPF11_0392_4	aPF11_0392_4::PF11_0392::hypothetical protein	4.62174	4.27677	5.33751	4.52796	4.47564	4.59794	5.8855	6.63645	5.70724	6.0297	3.84518	3.25159	4.55643	4.36476	4.23638
aPF14_0655_1	aPF14_0655_1::PF14_0655::RNA helicase-1, putative	1.09082	0.874465	0.65181	0.519346	0.521597	0.976218	0.981984	0.660361	0.464559	0.438662	0.99424	0.993717	0.975138	0.839376	0.910505
aPF13_0204_1	aPF13_0204_1::PF13_0204::nuclear movement protein, putative	0.640177	0.535568	0.418834	0.327527	0.367106	0.556782	0.576131	0.418737	0.350557	0.363861	0.572797	0.657865	0.586471	0.627388	0.63356
aPFD0207c_1	aPFD0207c_1::PFD0207c::	2.80194	2.13672	2.0549	1.41189	1.39194	2.33489	2.68221	2.23209	1.32385	1.61265	2.79614	3.01511	2.43958	2.13214	2.36478
aPFC0875w_2	aPFC0875w_2::PFC0875w::hypothetical protein	0.397626	0.347786	0.532704	1.7355	2.26076	0.438453	0.404572	0.405835	0.51301	0.503321	0.306623	0.301889	0.298441	0.241397	0.265564
aPF13_0067_0	aPF13_0067_0::PF13_0067::hypothetical protein	1.06564	1.17892	1.43581	0.974752	1.05849	1.40622	1.19451	1.82626	1.52336	1.77874	1.5853	1.69687	1.64489	1.45206	1.54533
aPF08_0123_0	aPF08_0123_0::PF08_0123::hypothetical protein	1.31349	0.961134	0.79971	0.776409	0.706679	1.44954	0.971742	1.00638	0.887793	0.734062	0.925087	0.932081	0.802782	0.770756	0.766342
aPF13_0158_0	aPF13_0158_0::PF13_0158::hypothetical protein	1.04178	0.65446	0.541866	0.536309	0.503241	0.946636	0.760493	0.559489	0.50161	0.467822	0.87681	0.740885	0.71487	0.763404	0.806808
aPFL1165w_0	aPFL1165w_0::PFL1165w::hypothetical protein	0.470524	0.613348	1.28791	2.32009	3.03016	0.444792	0.521079	0.565354	0.769516	1.37557	0.395347	0.683023	0.614233	0.507302	0.625972
aPFE1370w_0	aPFE1370w_0::PFE1370w::hsp70 interacting protein, putative	0.778021	0.563346	0.426687	0.390162	0.408406	0.728994	0.74641	0.539549	0.433209	0.471625	0.769818	0.846546	0.780804	0.841827	0.737256
aPFC0815c_0	aPFC0815c_0::PFC0815c::hypothetical protein	0.372443		0.329831	0.11222	0.82293	0.358158	0.22021	0.424602	0.605637	1.08017	0.416224	0.433965	0.342397	0.379864	0.455252
aPFE0515w_0	aPFE0515w_0::PFE0515w::hypothetical protein	0.372443	0.302229	0.345538	0.399296	0.515478	0.303219	0.241975	0.355399	0.357682	0.500785	0.58454	0.611324	0.505498	0.471766	0.585505
aPFE0385w_1	aPFE0385w_1::PFE0385w::hypothetical protein	0.811156	0.788907	1.18713	1.43016	1.98849	0.746955	0.884682	1.05447	1.48916	1.77874	1.44047	1.51699	1.36149	1.26825	1.3607
aPF08_0068_1	aPF08_0068_1::PF08_0068::hypothetical protein	1.90595	2.01449	1.66748	1.50845	1.58773	1.93342	2.27764	1.63507	1.54331	1.41107	1.51093	1.50064	0	1.55377	1.91712
aPFL1725w_1	aPFL1725w_1::PFL1725w::ATP synthase beta chain, mitochondrial precursor, putative	1.06431	1.10225	0.616471	0.642005	0.636317	1.24669	0.853955	0.772963	0.738165	0.541355	1.48614	1.30064	1.10007	1.13469	1.11663
aPF14_0262_0	aPF14_0262_0::PF14_0262::hypothetical protein	0.507635	0.634459	0.41098	0.745092	0.966713	0.528257	0.477549	0.568873	0.46741	0.722652	0.456672	0.459122	0.357435	0.405596	0.356614
aPF08_0125_1	aPF08_0125_1::PF08_0125::tubulin gamma chain	1.4341	1.69004	1.22116	1.01912	0.891762	1.70944	1.1497	1.20578	1.06735	0.924233	1.77058	1.63271	1.3638	1.29521	1.30759
aPFA0350w_1	aPFA0350w_1::PFA0350w::	0.503659	0.697794	0.458099	0.35493	0.458883	0.435283	0.363603	0.246316	0.24938	0.351183	0.8194	0.632708	0.535574	0.533035	0.495719
aMAL7P1.146_2	aMAL7P1.146_2::MAL7P1.146::hypothetical protein	1.95632	1.76782	1.76826	1.45887	1.20686	1.8732	2.27764	2.0022	1.87819	1.52771	1.95586	1.87297	1.67728	1.58072	1.73628
aMAL8P1.98_1	aMAL8P1.98_1::MAL8P1.98::hypothetical protein	1.5017	1.36003	1.16619	1.05826	0.865759	1.58794	1.14586	1.26325	0.936244	1.07003	2.91096	2.43649	2.31349	2.22282	2.36225
aPFF0600w_0	aPFF0600w_0::PFF0600w::hypothetical protein	2.20682	2.60451	1.85334	1.48366	1.49902	2.06654	2.01902	1.81922	1.62026	2.2212	2.16463	2.37108	2.30308	2.82815	2.86556
aPF11_0148_0	aPF11_0148_0::PF11_0148::dynein light chain type 2, putative					0.261563	0.18489	0	0.166556	0	0.187636	0.260955	0.314467	0.249857	0.289187	0.409727
aPF14_0212_0	aPF14_0212_0::PF14_0212::hypothetical protein	2.76615	2.73006	3.37554	3.10955	2.96285	1.68091	2.05359	3.46367	4.97763	5.19929	2.787	2.65159	2.43611	2.57572	2.37869
aPF13_0271_1	aPF13_0271_1::PF13_0271::ABC transporter, putative	0.547398	0.740017	1.39655	1.66765	1.59997	0.386684	0.503155	1.18818	2.16604	1.87763	0.542787	0.518242	0.42684	0.409273	0.483073
aPF14_0668_0	aPF14_0668_0::PF14_0668::hypothetical protein	0.901285	0.838908	0.855991	0.699421	0.758686	1.29845	1.08825	1.02045	0.624163	0.782239	1.79668	1.99121	2.31696	2.68478	2.68346
aPF14_0430_1	aPF14_0430_1::PF14_0430::hypothetical protein	0.736933	0.580014	0.369097	0.379723	0.334984	1.00897	0.619661	0.514918	0.414683	0	1.03077	0.922018	0.751886	0.900645	0.892801
aPFC0380w_1	aPFC0380w_1::PFC0380w::dual-specificity protein phosphatase, putative	1.38639	1.10669	1.09813	0.853397	0.804574	1.29212	1.23164	1.03805	0.936244	0.794917	1.76275	1.70944	1.77098	1.89932	1.77928
aPFI0330c_1	aPFI0330c_1::PFI0330c::hypothetical protein	0.959603	0.824464	0.671443	0.46715	0.54607	1.00897	1.00887	0.770617	0.743865	0.612352	0.845495	0.978622	1.0885	1.00358	1.16216
aPF14_0520_0	aPF14_0520_0::PF14_0520::6-phosphogluconate dehydrogenase, decarboxylating, putative	2.00668	1.57226	1.23425	0.961703	0.786219	1.59005	1.92556	1.33832	0.990395	0.919162	2.02632	1.96982	1.7652	1.78904	1.82227
aPFD0875c_0	aPFD0875c_0::PFD0875c::hypothetical protein	0.577883	0.4689	0.403127	0.326222	0.316629	0.493392	0.48395	0.45979	0.403283	0.414574	0.631512	0.734595	0.735691	0.791587	0.920622
aPF07_0118_1	aPF07_0118_1::PF07_0118::hypothetical protein	2.67204	1.96449	1.9214	1.42755	1.39041	2.65396	2.41335	2.11128	2.19739	1.59871	2.82354	2.82643	3.05497	3.62709	3.8393
aPFD0260c_0	aPFD0260c_0::PFD0260c::sequestrin	0.380395	0.367786	0.191093	0.217916		0.471205	0.284225	0.387068	0.220879	0.294132	0.280527	0.400002	0.348181	0	0.386965
aPF11_0176_0	aPF11_0176_0::PF11_0176::hypothetical protein	1.94572	2.06783	1.4188	1.34665	1.20227	1.88693	1.64646	1.00051	0.790891	1.01425	1.96369	1.96228	2.29614	2.39804	2.34455
aPF11_0226_2	aPF11_0226_2::PF11_0226::hypothetical protein	0.274362	0.33223	0.578514	0.832519	2.33724	0.304276	0.240695	0.338978	0.491635	0.715045	0	0.30692	0.181609	0.225468	0.198541
aPFL1320w_1	aPFL1320w_1::PFL1320w::hypothetical protein	1.83703	2.3145	2.34547	1.50845	1.30017	1.73585	1.77961	2.52063	2.14182	1.89538	1.04904	1.84529	1.67728	1.81354	1.9108
aPF07_0106_1	aPF07_0106_1::PF07_0106::hypothetical protein	0.327378	0.250006	0.298419	0.611993	0.896351	0.232433	0.211248	0.241624	0.316356	0.432323	0.301403	0.309436	0.268365	0.241397	0.319941
aMAL8P1.215_0	aMAL8P1.215_0::MAL8P1.215::	0.267735	0.400009	0.261771		0.365577	0.340197	0.1754	0.317865	0.228005	0.404431	0.399262	0.320757	0.190863	0.159298	0.228891
aPF11_0056_1	aPF11_0056_1::PF11_0056::hypothetical protein	0.234599		0.46857		0.558307	0.216585	0.189483	0.228722	0.23228	0.581925	0.575407	0.353461	0.28109	0.265905	0.343968
aPFL1310c_1	aPFL1310c_1::PFL1310c::ATP-dependent RNA helicase, putative	1.10275	0.968911	0.819343	0.638091	0.570544	1.05651	0.985825	0.755369	0.765241	0.663065	1.6127	1.61259	1.61135	1.62361	1.81089
aPFI0395w_2	aPFI0395w_2::PFI0395w::hypothetical protein	1.68593	2.26227	2.64127	3.46839	3.37279	2.27045	1.10105	3.22439	4.07843	3.85795	1.05556	1.5107	1.81031	1.50353	1.60856
aPFL1280w_0	aPFL1280w_0::PFL1280w::hypothetical protein	0.835014	0.833353	0.666207	0.793372	0.803045	0.883245	0.492912	0.65567	0.695414	0.628834	1.13255	1.27674	1.20417	1.24742	1.26965
aPF10_0161_1	aPF10_0161_1::PF10_0161::hypothetical protein	0.376419	0.33223	0.316743	0.371893	0.442057	0.32118	0.357201	0.480903	0.522986	0.477964	0.456672	0.462896	0.373629	0.435005	0.503307
aMAL13P1.296_0	aMAL13P1.296_0::MAL13P1.296::hypothetical protein	1.63557	2.3545	2.2617	2.68938	2.98121	1.87425	2.14321	3.30181	4.14826	4.19645	1.27868	1.43145	2.12263	2.1836	2.35846
aPF10_0188_1	aPF10_0188_1::PF10_0188::hypothetical protein	2.69458	3.10007	3.63207	3.12651	2.7793	2.6434	3.677	3.77567	3.5526	3.2532	1.74971	1.82391	1.49683	1.19596	1.38852
aPFL0330c_0	aPFL0330c_0::PFL0330c::DNA-directed RNA polymerase III subunit, putative	0.551374	0.366675	0.320669	0.294905	0.310511	0.5758	0.48011	0.460963	0.304956	0.375272	0.778952	0.812583	0.784274	0.814869	0.838423
aMAL13P1.163_0	aMAL13P1.163_0::MAL13P1.163::er lumen protein retaining receptor 1, putative	2.09019	1.73893	1.64392	1.66895	1.23439	2.32222	2.34293	2.10424	2.13754	1.73056	1.68447	1.41259	0.964727	0.958237	0.957295
aPF10_0242_1	aPF10_0242_1::PF10_0242::hypothetical protein	0.868149	0.768907	0.604691	0.588505	0.572074	0.879019	0.894924	0.715489	0.641263	0.519802	0.776342	0.737111	0.755356	0.806291	0.792898
aPFI0120c_1	aPFI0120c_1::PFI0120c::hypothetical protein	0.0914539		0.107326	0.35754	0.761745	0.0813515	0.0883401	0.110256	0.114002	0.131852	0.070458	0.0591198	0.0740318	0.0771981	0.0834629
aPFF1295w_0	aPFF1295w_0::PFF1295w::hypothetical protein, conserved	0.992739	0.9578	0.660972	0.598944	0.512419	0.884301	0.7016	0.606406	0.537236	0.453876	1.01642	0.978622	0.924241	0.948434	0.89533
aPFA0665w_0	aPFA0665w_0::PFA0665w::hypothetical protein	0.905261	1.28336	0.838976	0.319698	0.293685	0.838871	1.48386	0.736602	0	0.422181	0.810267	1.01636	0.779648	1.56112	1.18239
aPFD0165w_0	aPFD0165w_0::PFD0165w::ubiquitin-specific protease, putative	2.34069	2.10005	2.32191	1.77204	1.59691	2.55887	2.60411	2.35525	2.21307	2.08808	1.92846	2.13083	1.93639	1.73512	1.98288
aPF14_0245_1	aPF14_0245_1::PF14_0245::hypothetical protein	1.58122	1.12336	1.00258	0.964313	0.902469	1.14949	1.21628	1.30782	1.23693	1.30204	1.30478	1.10818	1.0885	1.07342	1.00914
aPFL0220c_0	aPFL0220c_0::PFL0220c::hypothetical protein	0.560652	0.686683	0.701546	0.59242	1.04778	0.45747	0.43786	0.580602	0.832217	0.83929	0.807657	1.18491	1.00059	0.921476	1.3607
aMAL7P1.35_1	aMAL7P1.35_1::MAL7P1.35::hypothetical protein	0.911888	1.15336	0.807564	0.833824	0.699031	1.18646	0.842432	0.812843	0	0.590799	2.40601	2.38995	3.97805	4.45543	4.06566
aPF11_0128_0	aPF11_0128_0::PF11_0128::hypothetical protein, conserved	1.68726	1.38559	1.42665	0.789458	1.27111	1.42841	1.22012	1.18935	1.06592	1.09539	1.46918	1.45284	1.38925	1.31359	1.28735
aPF11_0407_1	aPF11_0407_1::PF11_0407::adrenodoxin reductase, putative	0.894658	0.798907	0.722488	0.606773	0.789278	0.913884	0.778418	0.734256	0.636988	0.670671	0.725456	0.812583	0.722967	0.786686	0.828306
aPFE1275c_1	aPFE1275c_1::PFE1275c::RNA methyltransferase, putative	1.06829	0.754462	0.591602	0.724213	0.775512	1.12096	0.839872	0.662707	0.688289	0.692224	1.34523	1.30944	1.04686	1.34423	1.21274
aPFI0975c_5	aPFI0975c_5::PFI0975c::hypothetical protein	1.92318	1.86782	2.72765	2.67502	1.82941	2.16585	2.69373	3.88945	2.89708	3.62847	1.56704	1.66542	2.10875	1.89564	2.01955
aPF14_0611_1	aPF14_0611_1::PF14_0611::hypothetical protein	0.167003		0.270933	0.264892	0.256974	0	0	0	0	0.193975	0.150049	0.149686	0	0	0
aPFI0405w_0	aPFI0405w_0::PFI0405w::hypothetical protein	2.70783	2.70006	2.81535	2.53409	1.64586	2.81032	3.13415	2.81269	2.80303	2.25924	1.76014	1.49938	1.50377	1.47412	1.4391
aPFB0932w_0	aPFB0932w_0::PFB0932w::hypothetical protein	0.33268	0.213338	0.176695	0.182684	0.212616	0.238772	0.252218	0.197053	0.148203	0.180029	0.217898	0.172328	0.202431	0.199735	0.197276
aPFC0840w_0	aPFC0840w_0::PFC0840w::P-type ATPase, putative	2.31153	1.73448	2.60724	2.55758	2.10321	2.19438	2.38134	3.23143	3.30037	2.30995	1.88671	1.94592	1.98035	2.02186	1.83871
aPF13_0184_0	aPF13_0184_0::PF13_0184::hypothetical protein	0.421483	0.340008	0.327214	0.362759	0.403817	0.400418	0.337997	0.38003	0.299256	0.418377	0.506253	0.515726	0.52979	0.561218	0.572859
aPFC0140c_0	aPFC0140c_0::PFC0140c::N-ethylmaleimide-sensitive fusion protein, putative	1.75353	1.36448	1.68581	1.63372	1.37053	1.65133	1.69383	1.52012	1.43928	1.0003	2.27162	2.46794	2.23021	2.45809	2.17383
aPFE1270c_2	aPFE1270c_2::PFE1270c::hypothetical protein	0.384371	0.432232	0.399201	0.311868	0.385461	0.510296	0.48011	0.320211	0.310656	0.360058	1.02164	1.06667	1.13708	1.0967	1.27977
aPFE0570w_12	aPFE0570w_12::PFE0570w::hypothetical protein	1.12926	0.942244	1.03007	0.917337	0.82293	0.978331	1.19451	1.27498	0.72534	0.933108	0.73198	0.711954	0.638524	0.597979	0.686672
aPF14_0569_1	aPF14_0569_1::PF14_0569::hypothetical protein	1.16107	1.07002	0.969862	0.906898	0.830578	1.08187	0	1.02397	1.02602	0.983821	1.97282	1.98366	1.95028	2.05126	1.87286
aPF14_0074_1	aPF14_0074_1::PF14_0074::hypothetical protein	0.144471					0.144742	0	0.166556	0	0.164815	0	0.176102	0	0.181354	0.136576
aMAL13P1.298_1	aMAL13P1.298_1::MAL13P1.298::hypothetical protein	0.942373	1.23225	1.09813	1.13525	1.04013	0.994179	0.384088	1.58581	1.72714	1.34008	0.827229	1.06164	1.53616	1.28664	1.20136
aPF14_0095_1	aPF14_0095_1::PF14_0095::hypothetical protein	1.12793	0.936688	0.824579	0.899069	0.789278	0.852606	0.900045	0.864452	0.503035	0.622495	1.2278	0.899376	0.741475	0.920251	0.706906
aPF11_0390_0	aPF11_0390_0::PF11_0390::reticulocyte binding protein, putative	0.539446	0.404454	1.20415	2.0278	0.858111	0	0.419936	0.838647	0.712515	0.45134	0.241384	0.309436	0.304224	0.341877	0.185895
aPF14_0545_0	aPF14_0545_0::PF14_0545::thioredoxin	2.58589	3.35563	2.53787	1.86077	1.76823	2.47647	2.42231	2.26141	1.46493	1.93721	1.91672	1.58491	1.67613	1.37976	1.50107
aPFL1400c_0	aPFL1400c_0::PFL1400c::hypothetical protein	0.567279	0.365564	0.286639	0.281856	0.278389	0.529313	0.327755	0.376512	0.286431	0.2954	0.498425	0.527047	0.497401	0.497499	0.561478
aMAL7P1.127_1	aMAL7P1.127_1::MAL7P1.127::hypothetical protein	1.28301	1.6067	1.29053	1.05566	0.789278	1.88482	1.37759	1.50018	1.32528	1.17526	1.80581	1.89812	2.43264	2.65414	0
aMAL13P1.137_5	aMAL13P1.137_5::MAL13P1.137::hypothetical malaria antigen	2.27707	2.70229	2.93838	2.38534	2.15828	2.33912	2.99076	3.21149	3.72075	3.22911	2.42428	2.26794	2.01274	1.9226	2.35846
aPFD0320c_1	aPFD0320c_1::PFD0320c::hypothetical protein	0.649455	0.52779	0.638721	0.614603	0.653143	0.512409	0.35208	0.668572	0.585687	0.659261	0.563664	0.622645	0.6258	0.61636	0.690466
aPF14_0030_0	aPF14_0030_0::PF14_0030::hypothetical protein	0.353887	0.67446	0.643957	0.518041	0.669969	0.333858	0.236854	0.500842	0.418959	0.736598	0.431881	0.539626	0.481207	0.546514	0.608268
aPFB0765w_2	aPFB0765w_2::PFB0765w::hypothetical protein	0.991413	0.894465	0.98295	2.83291	5.18843	0.84838	0.699039	0.873835	0.604212	1.18794	1.27607	1.31699	1.38231	1.53171	1.22665
aPF14_0613_1	aPF14_0613_1::PF14_0613::hypothetical protein	2.79133	2.53228	2.0248	1.61154	1.7101	2.62227	3.50288	2.75991	2.57218	2.3239	2.74525	2.83901	2.74959	2.61371	2.7606
aPFC0405c_1	aPFC0405c_1::PFC0405c::hypothetical protein	1.11203	0.792241	0.827196	0.839044	1.00036	0.73639	0.695199	0.862106	0.574287	0.969875	1.6375	1.50064	1.28862	1.37731	1.37082
aPFF0130c_0	aPFF0130c_0::PFF0130c::hypothetical protein	0.445341	0.363342	0.3547	0.364064	0.299803	0.453244	0.254778	0.402316	0.407558	0.401896	0.343156	0.514468	0.410645	0.460738	0.534922
aPFE1300w_0	aPFE1300w_0::PFE1300w::hypothetical protein	1.34795	1.00336	0.803637		0.746449	1.20548	1.02551	0.941865	0.847892	0.961	0.99424	0.840256	0.798155	0	0.830836
aPFB0275w_1	aPFB0275w_1::PFB0275w::hypothetical protein, conserved	0.621622	0.706683	1.43974	3.48927	4.78615	0.566291	0.779698	0.901985	1.69721	1.82945	0.472329	0.420128	0.52979	0.551415	0.598151
aPF14_0504_0	aPF14_0504_0::PF14_0504::hypothetical protein	1.08154	1.04002	0.739503	0.626347	0.543011	1.21393	1.42881	1.17528	0.870693	0.722652	1.92716	1.87045	1.89591	2.19218	1.97023
aPFE0325w_4	aPFE0325w_4::PFE0325w::hypothetical protein	1.36253		1.02876	0.802507	1.1778	0.995235	1.25341	1.04156	0.862143	1.13596	1.26694	1.39246	1.21458	1.32095	1.35564
aPFI1700c_0	aPFI1700c_0::PFI1700c::vesicle transport protein, putative	1.28698	0.832242	0.806255	0.779019	1.06308	1.20865	0.996067	0.892602	0.779491	0.778435	1.81625	1.89058	1.73512	2.08925	1.88297
aPFC1010w_1	aPFC1010w_1::PFC1010w::hypothetical protein	0.850919	0.785574	0.865153	0.618517	0.639377	0.863171	0.720804	1.04508	0.886368	1.23231	0.919868	0.913213	0.778491	0.850405	0.849804
aMAL7P1.3_0	aMAL7P1.3_0::MAL7P1.3::hypothetical protein, conserved	0.174955		0.222505	0.249234	0.290626	0.192285	0.13315	0.21582	0.166728	0.174958	0.167011	0.213838	0.194333	0.154396	0.169455
aPFB1055c_0	aPFB1055c_0::PFB1055c::erythrocyte membrane protein 1 (PfEMP1)	0.174955					0.259902	0.121628	0.139579	0	0	0.151354	0.189938	0	0	0.150486
aPF10_0068_0	aPF10_0068_0::PF10_0068::hypothetical protein	0.791275	0.668904	0.447628	0.392772	0.465001	0.741672	0.732327	0.502015	0.310656	0.394289	0.938135	0.908181	0.86062	0.960688	0.873832
aPFF0660w_1	aPFF0660w_1::PFF0660w::hypothetical protein	1.08419	1.24892	2.22898	4.7785	4.5047	1.16428	1.18427	1.55531	2.23872	1.75972	1.27868	1.28177	1.21343	1.46799	1.30759
aPF14_0420_0	aPF14_0420_0::PF14_0420::hypothetical protein	0.797902	1.07447	1.28268	1.3623	1.74528	0.559952	0.544124	1.17293	1.09585	1.48968	0.621074	0.391197	0.359748	0.324722	0.319941
aPFA0077w_0	aPFA0077w_0::PFA0077w::	0.12724	0.0800019	0.219888	0.216612	0.11931	0.16376	0.129309	0.156	0.168153	0.0976214	0.0900296	0.0855351	0.130712	0.083325	0.0923151
[truncated: 8,140 more rows]

## Sheet: Sheet2
Ionomycin and Ionomycin plus EGTA on schizonts
UNIQID	NAME	Ctrl-30 mins	Ctrl-1 hour	Ctrl-2 hours	Ctrl-4 hours	Ctrl-6 hours	Iono-30 mins	Iono-1 hour	Iono-2 hours	Iono-4 hours	Iono-6 hours	I+E-30mins	I+E-1 hr	I+E 2 hours	I+E 4 hrs	I+E-6 hrs
aPFL1450c_0	aPFL1450c_0::PFL1450c::hypothetical protein	2.02332	1.99882	1.5903	1.639	2.59887	1.37383	1.73479	2.04904	NA	2.72144	NA	2.0208	2.18596	2.60666	1.24247
aMAL8P1.96_0	aMAL8P1.96_0::MAL8P1.96::hypothetical protein	2.29026	2.01648	1.94866	1.39091	1.49527	2.23154	2.09238	1.80739	1.43193	1.2467	1.75026	1.9496	1.38628	1.45007	1.47528
aMAL13P1.295_2	aMAL13P1.295_2::MAL13P1.295::hypothetical protein	1.21257	1.3187	1.626	1.12249	0.848926	1.53091	1.52491	1.52335	1.24122	1.05918	1.35293	1.51867	1.69187	1.43406	2.19362
aPFL0865w_0	aPFL0865w_0::PFL0865w::hypothetical protein	2.16247	1.96767	2.03282	NA	1.72486	2.24276	2.19732	2.32743	2.74102	2.85152	2.33443	2.27371	2.52433	2.78141	2.41357
aPF11_0363_0	aPF11_0363_0::PF11_0363::hypothetical protein	1.41136	1.3322	1.02024	1.11571	0.80455	1.38381	1.26838	1.28171	1.17819	0.99668	1.47562	1.21052	1.14157	1.10189	0.785024
aPF10_0094_0	aPF10_0094_0::PF10_0094::hypothetical protein	2.30446	3.14932	3.0977	3.92058	2.55835	2.50581	2.70389	3.53565	5.98791	6.11185	2.78353	2.86055	4.2361	5.23332	2.94238
aMAL7P1.132_0	aMAL7P1.132_0::MAL7P1.132::hypothetical protein	1.96085	2.54603	2.20754	1.24179	1.03222	2.18666	2.51215	2.45743	1.59678	1.35819	2.45599	2.66044	2.42247	1.77423	1.42498
aPFE0500c_0	aPFE0500c_0::PFE0500c::hypothetical protein	2.03326	2.15354	1.85301	1.81252	1.22901	2.35871	2.00168	2.11263	2.12526	2.16567	2.22299	2.39648	2.38969	2.86545	2.75168
aPF11_0378_1	aPF11_0378_1::PF11_0378::hypothetical protein	0.327992	0.328119	0.364735	0.508374	0.846997	0.331615	0.336853	0.37024	0.402426	0.652066	0.303903	0.348668	0.351252	0.376191	0.593155
aPF14_0669_0	aPF14_0669_0::PF14_0669::hypothetical protein	0.400405	0.332272	0.272914	NA	0.540226	0.431349	0.354991	0.399916	0.33778	0.315897	NA	0.375678	0.337202	0.378859	0.298332
aMAL8P1.219_0	aMAL8P1.219_0::MAL8P1.219::	0.207302	0.260626	0.596839	0.330782	0.37237	0.245595	NA	0.385784	0.274749	0.422322	NA	0.297105	0.553808	NA	0.17666
aPFL0535c_1	aPFL0535c_1::PFL0535c::hypothetical protein	1.81318	1.98844	1.22174	0.820177	0.756316	1.84757	1.85269	1.82718	1.0198	0.967963	0.872314	1.91768	1.69421	1.10723	0.549868
aPFL1795c_1	aPFL1795c_1::PFL1795c::hypothetical protein	0.394726	0.439222	0.474411	0.736126	0.912595	0.415142	0.378312	0.375893	0.534952	0.577737	0.33767	0.322886	0.378182	0.353513	0.434044
aMAL8P1.109_0	aMAL8P1.109_0::MAL8P1.109::hypothetical protein, conserved	2.24057	2.26256	4.23909	6.50583	8.12461	2.43351	2.42664	3.27422	5.94427	5.87197	2.0294	2.31791	3.1402	4.91049	7.09095
aPFL0570c_1	aPFL0570c_1::PFL0570c::hypothetical protein	0.785192	0.833795	0.818741	0.751038	0.787186	0.841504	0.760511	0.864836	0.690105	0.788898	0.729367	0.782048	0.857056	0.743044	0.606024
aPFE1180c_2	aPFE1180c_2::PFE1180c::hypothetical protein	0.609127	0.71127	0.589188	0.588358	0.669494	0.332862	0.687958	0.788527	0.58667	0.613212	0.762009	0.829929	0.66855	0.84843	1.04358
aMAL13P1.293_0	aMAL13P1.293_0::MAL13P1.293::hypothetical protein	0.369168	0.436107	0.496091	0.618183	0.86629	0.345328	0.408111	0.421113	0.441214	0.640241	0.47724	0.541418	0.506974	0.568288	0.662181
aPF13_0165_0	aPF13_0165_0::PF13_0165::hypothetical protein	0.702839	0.72373	0.777932	0.822888	0.816126	0.847738	0.791605	0.758851	0.670711	0.724705	0.651703	0.660505	0.681429	0.622983	0.632933
aPFL0620c_1	aPFL0620c_1::PFL0620c::choline transporter	1.46673	1.30521	1.11844	0.704945	0.567237	1.50224	1.37462	1.23931	0.961621	0.733151	1.48687	1.38608	1.05024	0.865772	0.721847
aPF13_0319_0	aPF13_0319_0::PF13_0319::hypothetical protein	0.316633	0.306313	0.330302	0.292823	0.287477	0.383975	0.29669	0.317954	0.237577	0.216229	0.31741	0.286055	0.270464	0.250794	0.297162
aPFF0835w_1	aPFF0835w_1::PFF0835w::hypothetical protein	1.17282	1.39243	1.42578	1.0059	0.789115	1.50349	1.44717	1.25203	1.19273	0.97472	1.02877	1.21788	1.07834	1.00985	1.12547
aPFF0095c_1	aPFF0095c_1::PFF0095c::hypothetical protein	1.64848	1.82023	1.98436	2.18397	2.16283	1.65683	1.89545	2.02925	2.06385	2.08796	1.57129	1.8391	2.19064	2.08906	2.44984
aPFE1440c_0	aPFE1440c_0::PFE1440c::hypothetical protein	0.643204	0.734113	0.609592	0.772728	1.28304	0.602143	0.59338	0.665584	0.803237	1.20446	0.485119	0.643317	0.563175	0.900457	1.78414
aPFB0615c_1	aPFB0615c_1::PFB0615c::hypothetical protein	NA	0.574208	1.08528	NA	0.634765	0.503656	0.655568	0.825268	NA	0.772005	0.553779	0.640862	0.714213	0.397535	0.622403
aPF14_0170_4	aPF14_0170_4::PF14_0170::hypothetical protein	0.797971	0.880521	1.399	1.19976	1.34285	0.966172	1.05202	1.15453	1.27193	1.48826	0.87344	0.988303	1.23641	1.0592	1.33021
aMAL13P1.380_0	aMAL13P1.380_0::MAL13P1.380::chloroquine resistance marker protein, putative	2.41663	2.7942	4.41636	4.90479	4.32566	2.32255	3.13662	3.8635	6.01215	7.00548	2.31191	2.77339	4.64356	4.93584	4.72535
aPFL1430c_0	aPFL1430c_0::PFL1430c::hypothetical protein	1.3645	NA	1.61198	1.70543	2.62202	1.88996	1.66354	1.36508	1.20081	1.59131	1.39233	1.42045	1.49985	1.09522	2.15852
aPF14_0529_1	aPF14_0529_1::PF14_0529::gamma-adaptin, putative	1.56044	1.32805	1.26255	0.965233	0.762104	1.63065	1.38239	1.2054	1.0198	0.981477	1.58818	1.39222	1.37574	1.37803	1.22258
aPFF0275c_2	aPFF0275c_2::PFF0275c::nucleoside diphosphate kinase, putative	0.861865	0.840025	0.549653	0.470415	0.926101	0.931265	0.814925	0.847878	0.418588	0.87843	NA	0.789414	0.799684	1.05387	1.88593
aPF14_0714_0	aPF14_0714_0::PF14_0714::hypothetical protein, conserved	0.829208	0.768379	0.918215	1.17401	1.73451	0.962432	0.812334	0.741893	1.11516	1.43421	0.868938	0.782048	0.667379	0.943145	0.979232
aMAL13P1.258_1	aMAL13P1.258_1::MAL13P1.258::hypothetical protein	1.36734	1.5731	1.23449	0.801197	0.534437	1.47481	1.76718	1.37498	0.840408	0.604765	1.51614	1.70897	1.18489	0.665671	0.621233
aPF11_0131_0	aPF11_0131_0::PF11_0131::hypothetical protein	0.637525	0.7175	0.760078	0.657497	0.661776	0.645777	0.751442	0.750372	0.719196	0.64193	0.597676	0.718207	0.5983	0.646995	0.890317
aPF07_0035_0	aPF07_0035_0::PF07_0035::cg1 protein	1.99919	2.11304	1.9206	1.15638	0.983982	2.34001	2.26987	1.93034	1.35273	0.969652	2.18022	2.23442	1.74572	0.904459	0.621233
aMAL7P1.229_1	aMAL7P1.229_1::MAL7P1.229::	2.56714	2.27087	2.82606	2.4524	1.77503	3.00448	2.69871	2.24829	2.98022	2.20452	2.6372	2.72059	2.28548	2.0357	1.54197
aPF14_0035_2	aPF14_0035_2::PF14_0035::hypothetical protein	NA	1.09754	1.00493	1.03844	1.16341	1.00482	1.21526	1.1404	0.938995	1.22811	0.997252	1.18842	1.32656	1.13524	1.27639
aPF14_0715_0	aPF14_0715_0::PF14_0715::hypothetical protein	0.881744	1.17022	0.711616	0.672409	0.760175	0.415142	1.09477	0.754611	0.659397	0.738219	1.07604	1.13317	0.859397	0.733706	0.68675
aPF13_0020_1	aPF13_0020_1::PF13_0020::hypothetical protein	1.25375	1.31974	1.0687	0.782218	0.706152	1.35513	1.26838	1.20116	1.01495	0.848023	1.44523	1.44746	1.2048	1.1259	0.969873
aPF14_0266_0	aPF14_0266_0::PF14_0266::hypothetical protein	NA	1.28652	0.87868	0.57209	0.507426	1.11827	1.22044	1.08387	0.735357	0.697676	1.2989	1.36766	NA	1.11523	0.822462
aPFI0500w_1	aPFI0500w_1::PFI0500w::hypothetical protein	1.23245	1.18995	1.20516	0.999124	0.765963	1.28781	1.23211	1.14464	1.10384	0.944313	1.25276	1.28909	1.10293	0.963155	0.689089
aPFC0430w_1	aPFC0430w_1::PFC0430w::hypothetical protein	0.322312	0.332272	0.439978	0.375519	0.416745	0.375249	0.360174	0.333499	0.320002	0.368265	0.315159	0.37445	0.34774	0.369521	0.525299
achr11tRNALeu1_0	achr11tRNALeu1_0::chr11-tRNA-Leu-1::(tRNA) tRNA-Leu	1.23955	0.953205	4.01464	2.63677	0.889443	0.653257	0.892661	0.943971	0.822631	0.528747	1.2944	0.381816	1.1041	1.25397	11.8467
aPFB0455w_0	aPFB0455w_0::PFB0455w::ribosomal L37ae protein, putative	0.708519	0.571093	0.531799	0.408055	0.333782	0.691904	0.627065	0.500248	0.35879	0.292247	0.599927	0.554923	0.337202	0.26947	0.312372
aMAL13P1.28_1	aMAL13P1.28_1::MAL13P1.28::hypothetical protein	0.526774	0.457912	0.364735	0.33756	0.368511	0.544796	0.501393	0.408395	0.387881	0.341236	0.517761	0.513181	0.362961	0.436221	0.352149
aPFE1510c_1	aPFE1510c_1::PFE1510c::Phosphoenolpyruvate/phosphate translocator precursor, putative	1.92819	1.7465	1.25999	0.916429	0.74281	1.48479	1.86694	1.62793	1.27516	1.01188	2.12957	1.91768	1.44013	1.28198	0.813102
aMAL13P1.308_0	aMAL13P1.308_0::MAL13P1.308::hypothetical protein, conserved	2.0858	2.07982	3.56828	5.5162	7.35479	2.0433	2.18955	2.93366	5.22508	6.72675	2.12507	2.38298	3.31816	4.4756	5.69054
aPFL1930w_4	aPFL1930w_4::PFL1930w::hypothetical protein	1.586	1.77558	2.11189	1.45463	1.25024	2.18292	2.09756	2.22992	1.81334	1.62847	1.65571	1.91645	2.41193	1.5728	1.32436
aPF14_0506_0	aPF14_0506_0::PF14_0506::hypothetical protein	2.41805	2.39236	NA	1.27839	1.21165	3.07305	2.87621	2.80365	2.02021	1.35819	1.50038	2.9158	2.82641	2.26915	1.85083
aMAL13P1.92_0	aMAL13P1.92_0::MAL13P1.92::40S ribosomal protein S15, putative	0.863285	0.740344	0.61852	0.355184	0.40324	0.958692	0.85768	0.666997	0.420204	0.349683	0.778892	0.753811	0.467166	0.342841	0.264404
aPF11_0330_0	aPF11_0330_0::PF11_0330::hypothetical protein	0.282556	NA	NA	NA	0.295195	0.144614	0.279847	0.339151	NA	0.302383	0.283643	0.289738	0.44492	0.437555	NA
aPF13_0010_1	aPF13_0010_1::PF13_0010::Gbph2	1.18844	1.48173	1.19368	0.790352	0.474627	1.43243	1.43551	0.955276	0.589902	0.364886	1.23137	0.838523	1.07483	0.590966	0.573266
aPFI1750c_0	aPFI1750c_0::PFI1750c::hypothetical protein	0.516835	0.461027	0.448905	0.409411	0.501638	0.466256	0.454752	0.534163	0.40081	0.542262	0.352302	0.446885	0.498778	0.534938	0.435214
aMAL8P1.102_1	aMAL8P1.102_1::MAL8P1.102::hypothetical protein	0.753955	0.767341	0.564957	0.383653	0.314488	0.733044	0.675002	0.505901	0.308688	0.21454	0.840799	0.531596	0.434382	0.380193	0.374378
aPFF0040c_0	aPFF0040c_0::PFF0040c::RIFIN pseudogene	NA	0.221169	NA	NA	NA	NA	0.238388	0.264255	NA	NA	NA	0.202571	0.234168	NA	NA
aPF07_0096_0	aPF07_0096_0::PF07_0096::hypothetical protein	1.08053	1.25225	0.529249	0.66292	0.931889	0.425115	0.976874	1.20681	0.796772	1.19602	1.43397	1.18351	0.831297	0.82842	0.540508
aMAL13P1.348_0	aMAL13P1.348_0::MAL13P1.348::hypothetical protein	1.71237	1.49834	1.02661	0.673765	0.735093	1.64062	1.63633	1.29867	0.659397	0.770316	1.8448	1.28172	1.11698	0.832422	0.51126
aMAL7P1.115_1	aMAL7P1.115_1::MAL7P1.115::hypothetical protein	0.874644	1.21798	0.967951	NA	0.9917	1.26413	1.30854	1.16301	0.830711	0.788898	0.927467	1.27067	1.07015	0.723033	0.940625
aPFB0745w_1	aPFB0745w_1::PFB0745w::hypothetical protein	NA	0.398726	0.285667	0.197927	0.270113	0.315408	0.361469	0.34763	0.176163	0.234811	0.373688	0.354807	0.30676	0.258798	0.262065
aMAL13P1.295_3	aMAL13P1.295_3::MAL13P1.295::hypothetical protein	1.11744	1.39554	1.29188	1.05606	0.874008	1.60821	1.47568	1.39193	1.25092	1.04229	1.12219	1.52235	1.49399	1.31934	1.40977
aPFL2540w_0	aPFL2540w_0::PFL2540w::hypothetical protein	0.423123	0.425723	0.593014	0.961166	2.20914	0.519863	0.456047	0.525684	0.895358	1.56766	0.397325	0.384272	0.420332	0.560284	0.542848
aPF07_0035_1	aPF07_0035_1::PF07_0035::cg1 protein	1.89554	2.02271	1.83898	1.06148	0.823844	2.05327	2.10922	1.71413	1.37213	0.937555	2.3243	2.17918	1.66259	0.927137	0.734717
aMAL7P1.124_0	aMAL7P1.124_0::MAL7P1.124::hypothetical protein	0.488438	0.479718	NA	0.250798	0.43218	NA	0.489733	0.573731	NA	NA	0.706856	0.498448	0.44492	0.449561	0.979232
aPFL1295w_1	aPFL1295w_1::PFL1295w::hypothetical protein	2.98742	2.99045	2.95231	2.12975	1.76152	2.75764	3.0252	3.22052	3.20325	2.81098	2.91409	3.36637	3.35329	3.47243	3.00555
aPFL0980w_1	aPFL0980w_1::PFL0980w::hypothetical protein	0.92008	1.06846	0.989631	1.13605	1.14605	1.00856	1.12457	1.17855	1.06506	1.04905	0.99275	1.05583	1.11347	0.984499	0.865749
aPFC0965w_2	aPFC0965w_2::PFC0965w::hypothetical protein	1.1714	1.27821	1.7242	2.20295	2.55642	1.26413	1.34612	1.78054	2.21739	2.67414	1.10868	1.29646	1.51858	1.55679	2.01228
aMAL7P1.138_0	aMAL7P1.138_0::MAL7P1.138::hypothetical protein	1.42272	1.36958	1.50868	1.13605	0.974335	1.57579	1.556	1.46259	1.30587	1.13182	1.20098	1.35661	1.35232	1.30466	1.01082
aPFL1720w_0	aPFL1720w_0::PFL1720w::Serine hydroxymethyltransferase	2.12698	1.71743	1.95631	1.15638	0.89909	2.24276	1.99132	1.65054	1.38506	1.25345	1.94948	1.94223	1.64269	1.21128	1.16642
aMAL7P1.207_3	aMAL7P1.207_3::MAL7P1.207::	2.80852	2.74955	3.26731	2.53509	2.12424	3.01072	2.90341	2.98877	3.18062	2.8228	2.74863	2.77216	3.27484	3.79926	5.03772
aPF13_0165_1	aPF13_0165_1::PF13_0165::hypothetical protein	0.406085	0.374844	0.439978	0.440591	0.555661	0.461269	0.4405	0.395676	0.368487	0.322654	0.36806	0.41742	0.350081	0.31616	0.478502
aPFF0325c_0	aPFF0325c_0::PFF0325c::hypothetical protein, expressed	0.563691	0.591859	0.830219	0.788996	0.827703	0.63331	0.598562	0.630256	0.609296	0.780452	0.565035	0.584388	0.707188	0.831088	1.36765
achr13MALr.2_0	achr13MALr.2_0::chr13-MALr.2::(trna) anticodon	0.354969	0.508792	0.374938	NA	0.677211	NA	NA	0.746133	0.391113	NA	NA	0.468983	0.715384	0.444225	0.552207
aPF08_0030_1	aPF08_0030_1::PF08_0030::hypothetical protein	0.555172	NA	0.772831	0.519219	0.603895	0.735537	NA	NA	0.315153	0.645308	NA	0.531596	0.588933	NA	0.717168
aMAL13P1.312_0	aMAL13P1.312_0::MAL13P1.312::hypothetical protein	2.17099	2.21999	1.88744	1.84777	2.61045	1.39129	2.47457	2.53233	2.13819	2.09641	2.35131	2.25038	1.90613	1.50743	1.81105
aPF13_0031_1	aPF13_0031_1::PF13_0031::hypothetical protein	1.13732	1.07573	0.890158	0.711724	0.692646	1.16439	1.21008	0.949623	0.838792	0.777073	0.987122	1.06442	1.01512	0.851098	0.782684
aPFI0235w_1	aPFI0235w_1::PFI0235w::replication factor A-related protein, putative	2.36835	2.06216	2.10934	1.46547	1.1229	2.38115	2.31004	1.9049	1.59678	1.44265	2.53703	2.50084	1.88857	1.77423	1.00029
aPF11_0127_2	aPF11_0127_2::PF11_0127::hypothetical protein	1.8004	2.32383	2.73551	3.13701	3.46902	2.26645	2.64948	2.73582	3.59275	3.96983	2.06542	2.36702	3.12263	3.32035	3.42205
aPFF0710w_0	aPFF0710w_0::PFF0710w::hypothetical protein, conserved	1.8217	2.22207	2.54167	3.50168	2.73393	1.55585	2.50178	2.75419	5.04245	5.92096	2.19936	2.73533	2.90954	4.67971	4.68206
aPFI0190w_0	aPFI0190w_0::PFI0190w::ribosomal protein L32, putative	0.938539	0.767341	0.46931	0.35654	0.358864	0.830284	0.754033	0.552534	0.449295	0.353061	0.885821	0.762405	0.437895	0.468238	0.256215
aPFC0125w_0	aPFC0125w_0::PFC0125w::ABC transporter, putative	0.725557	0.673889	0.613418	0.516508	0.491991	0.794131	0.702209	0.535576	0.492932	0.430769	0.801404	0.569655	0.526878	0.880447	0.878618
aPFC0320w_1	aPFC0320w_1::PFC0320w::hypothetical protein	1.86288	2.0902	1.96906	1.41125	0.997488	2.32629	2.41757	1.92751	1.51435	1.13182	2.07442	2.29826	1.94008	1.30466	1.12547
aMAL13P1.79_1	aMAL13P1.79_1::MAL13P1.79::hypothetical protein	1.06917	1.04043	1.45001	1.54275	1.65926	1.10829	1.10514	1.22094	1.51435	1.76024	1.08617	1.09757	1.26568	1.53144	1.16291
aMAL8P1.113_4	aMAL8P1.113_4::MAL8P1.113::hypothetical protein	1.30913	1.53468	1.68977	1.02624	1.03993	1.43991	1.62337	1.765	1.09738	1.03891	1.497	1.60829	1.68016	1.13524	1.98069
aPFF1020c_0	aPFF1020c_0::PFF1020c::hypothetical protein, conserved	2.5643	2.84819	2.32487	2.52289	1.92166	2.71525	2.36834	2.42776	3.62022	4.13369	2.38733	2.94035	3.09219	4.17679	2.75402
aPFC1045c_1	aPFC1045c_1::PFC1045c::hypothetical protein	0.719878	0.909595	1.93845	5.22473	10.4823	0.766704	0.803265	1.44139	4.07598	6.20814	0.671964	0.826245	1.58883	3.18828	4.96051
aPF14_0531_1	aPF14_0531_1::PF14_0531::hypothetical protein	1.96795	2.05593	2.26876	1.52241	1.24638	2.25772	2.13902	2.43765	1.88607	1.55246	1.77164	2.10429	2.16606	2.15576	2.41942
aPFA0310c_0	aPFA0310c_0::PFA0310c::calcium-transporting ATPase	1.67262	1.58556	1.94866	1.1957	0.89716	1.93234	1.70888	1.60108	1.39152	1.0727	1.62194	1.76544	1.77265	1.53678	1.71512
aMAL13P1.73_1	aMAL13P1.73_1::MAL13P1.73::hypothetical protein	0.749695	0.706078	0.652953	0.479905	0.439898	0.623336	0.826586	0.637322	0.546265	0.457797	0.689973	0.76486	0.711871	0.609643	0.627083
aPF11_0291_1	aPF11_0291_1::PF11_0291::hypothetical protein	0.912981	0.924131	1.04192	1.09809	1.3988	0.898851	0.987239	1.00191	1.09738	1.21798	0.971364	1.03373	1.30549	1.18994	0.907866
aMAL13P1.45_0	aMAL13P1.45_0::MAL13P1.45::hypothetical protein, conserved	1.10608	1.13492	1.33141	0.920496	0.825773	1.30277	1.19712	1.10648	1.06667	0.969652	1.03777	1.14422	1.10762	1.1219	0.944134
aPFL2015w_0	aPFL2015w_0::PFL2015w::hypothetical protein	1.17992	1.07988	1.45256	1.34753	1.17306	1.42869	1.44717	1.54596	1.55799	1.45448	1.12557	1.38485	1.45887	1.62883	1.16057
aPFB0615c_0	aPFB0615c_0::PFB0615c::hypothetical protein	0.634685	0.697771	NA	NA	0.617401	0.567236	0.608927	0.788527	0.787075	0.614901	NA	0.516864	0.605325	0.409541	0.809592
aPF10_0333_1	aPF10_0333_1::PF10_0333::hypothetical protein	NA	0.564862	0.468034	NA	NA	0.388962	0.410702	0.624603	NA	0.54564	0.476115	0.416192	0.483557	0.705691	1.33372
aPF14_0596_1	aPF14_0596_1::PF14_0596::hypothetical protein	NA	NA	0.316274	NA	0.83542	NA	NA	NA	NA	NA	NA	0.180473	NA	0.213442	0.138052
aPF14_0555_0	aPF14_0555_0::PF14_0555::hypothetical protein	1.96227	1.70912	1.57882	0.932697	0.823844	1.88372	1.63503	1.77348	1.05213	0.744976	1.89545	1.7458	1.4015	1.0592	0.794383
aPF14_0260_0	aPF14_0260_0::PF14_0260::hypothetical protein	1.68681	1.36335	1.63493	1.9264	3.10051	1.60945	1.31891	1.02735	1.75678	1.892	2.05303	1.02882	1.15094	1.59147	0.979232
aPFL0130c_1	aPFL0130c_1::PFL0130c::hypothetical protein, conserved	1.5931	1.88564	2.39884	2.31547	2.27088	1.84882	2.06517	2.25536	2.66022	2.97991	1.5848	1.95819	2.23865	2.33985	2.59608
aPF11_0164_0	aPF11_0164_0::PF11_0164::peptidyl-prolyl cis-trans isomerase	2.97038	2.54292	3.08367	1.50614	1.06502	3.13414	3.10423	2.71604	2.09132	1.68422	2.94223	2.90966	2.26089	1.68219	1.26587
aPF13_0235_5	aPF13_0235_5::PF13_0235::hypothetical protein	0.533874	0.515022	0.617244	0.607337	0.721587	0.617103	0.576537	0.617538	0.57374	0.631794	0.570663	0.627357	0.622887	0.692351	NA
aPFL1875w_0	aPFL1875w_0::PFL1875w::hypothetical protein	1.53773	1.73716	1.1618	1.14147	1.36021	1.15691	1.46272	1.5064	1.30425	1.42069	1.40246	1.50885	1.32656	1.86761	1.41328
aMAL8P1.13_1	aMAL8P1.13_1::MAL8P1.13::integral membrane protein	3.943	3.88447	4.8066	4.66755	3.80473	4.6264	3.95025	NA	5.28003	4.76548	3.88771	4.16806	4.40002	3.82994	1.68938
aPFF1300w_0	aPFF1300w_0::PFF1300w::pyruvate kinase, putative	0.9215	0.863907	0.974328	0.505663	0.43218	1.05718	0.963918	0.723523	0.492932	0.400361	0.859933	0.844661	0.610008	0.417545	0.471482
aMAL7P1.119_1	aMAL7P1.119_1::MAL7P1.119::hypothetical protein	3.01298	2.87934	4.53623	5.2288	4.20218	4.17635	4.33115	4.48386	5.12488	6.55444	3.00526	5.14163	2.87559	3.88731	3.68411
aPF10_0359_0	aPF10_0359_0::PF10_0359::hypothetical protein	NA	0.634432	0.636374	0.543621	0.827703	0.519863	0.645203	0.628843	0.544649	0.662201	0.65508	NA	0.525708	0.516262	0.558057
aPFB0655c_0	aPFB0655c_0::PFB0655c::hypothetical protein	0.34645	0.362384	0.392792	0.497529	0.551802	0.337848	0.349809	0.41546	0.402426	0.449351	0.323038	0.327797	0.354765	0.437555	0.531149
aPFE1150w_2	aPFE1150w_2::PFE1150w::multidrug resistance protein	0.846247	0.845217	0.845523	1.07369	2.02778	0.920045	0.795492	0.688194	0.903439	1.59638	0.771013	0.929373	0.865252	1.20328	1.28341
aPF11_0375_1	aPF11_0375_1::PF11_0375::hypothetical protein	1.10324	1.06016	1.10568	1.17401	1.38143	0.973652	1.06238	1.03158	1.27516	1.23149	1.24488	1.08161	1.11347	1.23129	0.930095
aPF13_0310_0	aPF13_0310_0::PF13_0310::hypothetical protein	0.492697	0.502561	0.576435	0.618183	0.690717	0.593416	0.619292	0.614712	0.468689	0.606455	0.52564	0.54019	0.505803	0.513594	0.586135
aPFE0415w_0	aPFE0415w_0::PFE0415w::transcription factor iib, putative	1.92819	2.21272	1.87979	1.25941	1.08045	1.21052	2.2608	2.61429	1.59678	1.38015	2.30854	2.37929	2.24919	1.15659	1.95028
aPF11_0348_0	aPF11_0348_0::PF11_0348::hypothetical protein	1.78337	1.81192	1.87596	1.55495	1.27532	1.76903	1.86306	2.04056	1.99597	2.08458	1.85268	1.93241	1.99745	2.34119	1.68002
aPF10_0220_0	aPF10_0220_0::PF10_0220::hypothetical protein	2.14117	2.1878	2.41541	2.68286	4.06327	2.16547	2.12477	2.36558	3.22911	4.46986	1.67147	2.18286	1.86749	2.29183	1.253
aPF14_0217_1	aPF14_0217_1::PF14_0217::hypothetical protein	0.981135	0.888828	0.882506	0.746971	0.665635	1.01853	0.984648	0.836573	0.753135	0.731462	0.918463	0.982164	0.962431	0.935141	1.07517
aPF13_0058_0	aPF13_0058_0::PF13_0058::hypothetical protein	1.24097	1.44123	3.48539	6.20894	12.3114	1.21925	1.49122	2.44754	5.45296	7.07305	1.06028	1.40572	2.15435	3.57381	4.68206
aPFA0130c_0	aPFA0130c_0::PFA0130c::Serine/Threonine protein kinase, putative	0.283975	NA	0.297144	0.283334	0.281689	0.225648	0.224137	0.25295	0.223031	0.255083	0.384944	0.187839	0.169772	0.273472	0.311202
aMAL13P1.164_0	aMAL13P1.164_0::MAL13P1.164::elongation factor tu, putative	1.13874	1.00616	0.929692	0.691389	0.663706	0.906331	1.05979	0.969407	0.670711	0.613212	1.14695	1.05951	0.780951	0.675009	0.531149
aPF10_0114_1	aPF10_0114_1::PF10_0114::DNA repair protein RAD23, putative	0.92008	0.92517	0.803438	0.582936	0.555661	1.02103	0.873227	0.821028	0.669094	0.586183	0.960109	0.881492	0.679088	0.680345	0.404796
aMAL8P1.98_0	aMAL8P1.98_0::MAL8P1.98::hypothetical protein	0.413184	0.39665	0.408095	0.338916	0.37044	0.447556	0.485846	0.498835	0.389497	0.49834	0.512133	0.570883	0.524537	1.25397	2.69435
aPF10_0023_0	aPF10_0023_0::PF10_0023::hypothetical protein	0.129209	0.117334	0.104574	0.154546	0.324135	0.140874	0.128263	0.101745	0.108283	0.177375	0.112557	0.1019	0.0983506	0.170753	0.239836
aPFE0040c_1	aPFE0040c_1::PFE0040c::Mature parasite-infected erythrocyte surface antigen (MESA) or PfEMP2	0.0440162	0.0602243	0.0484613	0.0637162	0.0675282	0.0561003	0.0518236	0.0466333	0.0404043	0.0540573	0.0382693	0.041742	0.0362961	0.0373523	0.0690259
aPF10_0040_0	aPF10_0040_0::PF10_0040::hypothetical protein	0.843407	NA	1.02789	1.19027	1.21165	0.676943	0.970396	0.932666	0.979399	1.09635	0.835171	1.00303	1.05493	1.10856	1.91869
aPF10_0080_0	aPF10_0080_0::PF10_0080::endonuclease, putative	2.7574	3.25004	2.2254	1.70136	1.53	2.03457	3.46311	3.38303	2.99315	2.47312	3.31817	3.5628	NA	3.16427	1.51506
aPF14_0359_0	aPF14_0359_0::PF14_0359::hypothetical protein, conserved	0.555172	0.614703	0.601941	0.489395	0.443757	0.713097	0.676297	0.534163	0.426669	0.412187	0.617936	0.611397	0.44492	0.429551	0.427025
aPF14_0568_0	aPF14_0568_0::PF14_0568::hypothetical protein	0.4643	0.556556	0.383865	0.309091	0.40131	0.408909	0.548034	0.493182	0.310305	0.439215	NA	0.530369	0.485899	0.617647	1.12664
aPFB0195c_1	aPFB0195c_1::PFB0195c::hypothetical protein	0.732656	0.743459	0.673357	0.587003	0.517073	0.946225	0.812334	0.661345	0.512326	0.418944	0.802529	0.788187	0.639279	0.432219	0.425855
aMAL7P1.19_3	aMAL7P1.19_3::MAL7P1.19::hypothetical protein	1.05355	1.21279	1.70125	1.54952	1.37565	1.12201	1.30336	1.5926	1.79233	2.29405	1.22237	1.37994	1.85461	2.06371	2.48376
aPF13_0161_1	aPF13_0161_1::PF13_0161::hypothetical protein	0.540973	0.570054	1.34544	4.52656	6.9882	0.650763	0.671115	1.08952	3.01577	4.08301	0.407455	0.550012	1.13337	2.45458	5.54313
aPF14_0281_1	aPF14_0281_1::PF14_0281::aspartyl protease, putative	1.98357	2.23661	2.67813	3.20615	2.51784	1.79022	1.95375	2.32177	3.34386	4.21815	1.95061	2.03922	2.23162	2.41723	2.92132
aPF14_0402_1	aPF14_0402_1::PF14_0402::hypothetical protein	1.49229	1.51911	1.80455	2.02536	1.61296	1.66306	1.79828	2.07024	2.48567	2.87179	1.40471	1.69914	2.57	3.01886	2.16905
aPFA0705c_0	aPFA0705c_0::PFA0705c::STEVOR pseudogene	0.752535	0.722692	0.353258	0.424323	0.845067	0.845244	0.971692	1.30715	0.522023	0.913905	NA	0.793097	NA	0.987167	0.425855
aPFC1015c_2	aPFC1015c_2::PFC1015c::hypothetical protein	1.11602	1.22421	1.06998	0.672409	0.542155	1.17686	1.20231	0.958102	0.698185	0.516922	1.10643	1.17982	0.858226	0.689683	0.494881
aPF10_0125_1	aPF10_0125_1::PF10_0125::hypothetical protein	0.80507	0.573169	0.498642	0.530065	0.600036	0.926278	0.73719	0.760264	0.471922	0.616591	0.595425	0.967432	0.70953	0.833756	1.05879
aPFA0370w_0	aPFA0370w_0::PFA0370w::hypothetical protein	1.70385	2.04763	1.44236	0.906939	1.03029	1.46359	1.87472	1.7975	1.22506	1.27035	1.52514	NA	NA	1.39938	1.02603
aPF14_0283_0	aPF14_0283_0::PF14_0283::hypothetical protein	0.596348	0.581476	0.522872	0.42839	0.405169	0.484956	0.594675	0.538403	0.395962	NA	NA	0.597892	0.537416	0.621649	0.67271
aMAL8P1.113_7	aMAL8P1.113_7::MAL8P1.113::hypothetical protein	1.67545	1.84515	NA	1.07233	1.16148	1.93359	1.90581	1.97414	1.34142	1.29737	1.42497	2.13007	NA	1.39804	0.942964
aPFC0416w_0	aPFC0416w_0::PFC0416w::hypothetical protein	1.60872	1.35505	1.36967	0.883893	0.885584	1.60073	1.6169	1.45128	1.14425	NA	1.0963	1.67582	1.56541	NA	1.04826
aPF07_0038_0	aPF07_0038_0::PF07_0038::Cg7	1.55761	1.97702	1.92315	1.21874	0.870149	1.71044	2.07942	1.90349	1.41253	1.04567	1.62194	1.87716	1.84993	1.28999	1.78648
aPFE0500c_2	aPFE0500c_2::PFE0500c::hypothetical protein	2.1	2.21584	2.73551	2.54458	1.56665	2.62425	2.52122	2.66092	2.5891	2.29574	2.10143	2.64448	2.67069	2.57331	2.79263
aPFL0120c_0	aPFL0120c_0::PFL0120c::cyclophilin, putative	1.17424	1.17126	1.45001	1.4004	1.91973	1.32895	1.20878	1.29725	1.48203	1.55584	1.18972	1.24858	1.42023	1.5061	1.14887
aPF08_0102_0	aPF08_0102_0::PF08_0102::asparagine-rich antigen Pfa55-14	0.790871	0.762149	0.677183	0.719858	0.534437	1.04222	0.899139	0.806897	0.698185	0.672337	0.858808	0.908502	0.83598	0.845762	0.827141
aMAL13P1.43_0	aMAL13P1.43_0::MAL13P1.43::hypothetical protein	0.454361	0.453759	0.402994	0.318581	0.320277	0.482462	0.435318	0.412634	0.311921	0.293936	0.500877	0.428469	0.394573	0.360183	0.356829
aMAL7P1.76_1	aMAL7P1.76_1::MAL7P1.76::hypothetical protein	0.215821	0.179635	0.184918	0.197927	0.291336	0.226894	0.198225	0.172402	0.15192	0.180754	0.231867	0.191522	0.170943	0.20277	0.246855
aPF14_0767_0	aPF14_0767_0::PF14_0767::stevor, putative	0.35071	0.345771	0.386415	0.324004	0.561449	0.312915	0.344627	NA	NA	NA	NA	NA	NA	0.365519	0.288973
aPF14_0736_1	aPF14_0736_1::PF14_0736::hypothetical protein	1.07343	0.952167	0.970502	0.836445	1.27146	1.05718	0.966509	1.15029	0.971318	1.20615	0.993876	0.95761	1.11347	0.889785	0.85522
aPF14_0341_0	aPF14_0341_0::PF14_0341::glucose-6-phosphate isomerase	0.487018	0.407033	0.348156	0.25622	0.237313	0.541056	0.458639	0.330672	0.305456	0.256772	0.500877	0.446885	0.30676	NA	0.267914
aPF11_0469_1	aPF11_0469_1::PF11_0469::hypothetical protein	0.597768	0.577323	0.601941	0.551755	0.6502	0.71933	0.655568	0.628843	0.55273	0.555776	0.492998	0.637179	0.632254	0.444225	0.50424
aPFC0520w_0	aPFC0520w_0::PFC0520w::26S proteasome regulatory subunit S14, putative	1.79046	1.50145	1.60432	1.47361	1.1229	2.05576	1.87731	1.86957	2.30304	1.8447	1.65008	1.67827	1.52326	1.83693	1.29043
aMAL13P1.295_0	aMAL13P1.295_0::MAL13P1.295::hypothetical protein	1.33042	1.62502	1.71017	1.24721	0.879796	NA	1.66095	1.464	1.3495	1.11662	1.41709	1.68564	1.85695	1.65551	2.51301
[truncated: 10,058 more rows]

## Sheet: Sheet3
	CGH-schizonts-Ionomycin and A23187 treatment
[truncated: 9,979 more rows]
