# Supplementary material for: Role of Calcium Signaling in the Transcriptional Regulation of the Apicoplast Genome of Plasmodium falciparum
Source: Biomed Res Int. 2014 Apr 27;2014:869401. doi: 10.1155/2014/869401 (PMC4022301; doi:10.1155/2014/869401)
Supplement: Supplementary file 1 — The supplementary material contains three dataset representing the three featured microarray based genomic studies: Dataset 1 (Transcriptional responses to Ionomycine DS1). This table contains results from the analysis of genome-wide gene expression responses of P. falciparum to Ionomycine and to A23187 as described in Figure 1. Briefly, P. falciparum cultures were treated by both compounds for 30 min, 1.0, 2.0, 4.0 and 6.0 hours and the cell samples were collected for total RNA isolations from both the treatment experimental courses (Inono-30 mins, Iono-1 h, e.t.c.) and untreated control cultures (ctrl-30mins, e.t.c.). The table summarizes relative mRNA levels of all P. falciparum genes determined by two channel competitive microarray hybridization were each sample was hybridized against an arbitrary RNA pool (for more details see materials and methods). Dataset 2 (CGH-DS2). This table contains results from microarray based comparative genomic hybridization (CGH) measuring the copy number of each gene in all time points from the ionophore treatment time courses as described for Dataset 1. The final findings from these the CGH experiment is featured in Figure 2 (a). Dataset 3 (Schizonts_IonomycineEGTA_DS3). This table summarizes results from genome-wide gene expression analyses of P. falciparum response to Inonomycine in the presence and absence of external calcium chelator EGTA. Briefly, the cells were treated for 30 min, 1.0, 2.0, 4.0 and 6.0 hours with Inonomycine of with Inonomycine+EGTA. Total RNA was isolated and subjected to a microarray analysis of mRNA expression levels for all P. falciparum genes using CGH as described in materials and methods. The labels of the experimental time points are analogous to the dataset 1. The findings from these experiments are described in Figure 2 (c). [file 869401.f1.zip › 871434.xls]

## Sheet: together-I+IE
UNIQID	NAME	Ctrl-30 mins	Ctrl-1 hour	Ctrl-2 hours	Ctrl-4 hours	Ctrl-6 hours	Iono-30 mins	Iono-1 hour	Iono-2 hours	Iono-4 hours	Iono-6 hours	IonoEGTA-30 mins	IonoEGTA-1 hour	IonoEGTA-2 hours	IonoEGTA-4 hours	IonoEGTA-6 hours
aPFL1450c_0	aPFL1450c_0::PFL1450c::hypothetical protein	2.02332	1.99882	1.5903	1.639	2.59887	1.37383	1.73479	2.04904	NA	2.72144	NA	2.0208	2.18596	2.60666	1.24247
aMAL8P1.96_0	aMAL8P1.96_0::MAL8P1.96::hypothetical protein	2.29026	2.01648	1.94866	1.39091	1.49527	2.23154	2.09238	1.80739	1.43193	1.2467	1.75026	1.9496	1.38628	1.45007	1.47528
aMAL13P1.295_2	aMAL13P1.295_2::MAL13P1.295::hypothetical protein	1.21257	1.3187	1.626	1.12249	0.848926	1.53091	1.52491	1.52335	1.24122	1.05918	1.35293	1.51867	1.69187	1.43406	2.19362
aPFL0865w_0	aPFL0865w_0::PFL0865w::hypothetical protein	2.16247	1.96767	2.03282	NA	1.72486	2.24276	2.19732	2.32743	2.74102	2.85152	2.33443	2.27371	2.52433	2.78141	2.41357
aPF11_0363_0	aPF11_0363_0::PF11_0363::hypothetical protein	1.41136	1.3322	1.02024	1.11571	0.80455	1.38381	1.26838	1.28171	1.17819	0.99668	1.47562	1.21052	1.14157	1.10189	0.785024
aPF10_0094_0	aPF10_0094_0::PF10_0094::hypothetical protein	2.30446	3.14932	3.0977	3.92058	2.55835	2.50581	2.70389	3.53565	5.98791	6.11185	2.78353	2.86055	4.2361	5.23332	2.94238
aMAL7P1.132_0	aMAL7P1.132_0::MAL7P1.132::hypothetical protein	1.96085	2.54603	2.20754	1.24179	1.03222	2.18666	2.51215	2.45743	1.59678	1.35819	2.45599	2.66044	2.42247	1.77423	1.42498
aPFE0500c_0	aPFE0500c_0::PFE0500c::hypothetical protein	2.03326	2.15354	1.85301	1.81252	1.22901	2.35871	2.00168	2.11263	2.12526	2.16567	2.22299	2.39648	2.38969	2.86545	2.75168
aPF11_0378_1	aPF11_0378_1::PF11_0378::hypothetical protein	0.327992	0.328119	0.364735	0.508374	0.846997	0.331615	0.336853	0.37024	0.402426	0.652066	0.303903	0.348668	0.351252	0.376191	0.593155
aPF14_0669_0	aPF14_0669_0::PF14_0669::hypothetical protein	0.400405	0.332272	0.272914	NA	0.540226	0.431349	0.354991	0.399916	0.33778	0.315897	NA	0.375678	0.337202	0.378859	0.298332
aMAL8P1.219_0	aMAL8P1.219_0::MAL8P1.219::	0.207302	0.260626	0.596839	0.330782	0.37237	0.245595	NA	0.385784	0.274749	0.422322	NA	0.297105	0.553808	NA	0.17666
aPFL0535c_1	aPFL0535c_1::PFL0535c::hypothetical protein	1.81318	1.98844	1.22174	0.820177	0.756316	1.84757	1.85269	1.82718	1.0198	0.967963	0.872314	1.91768	1.69421	1.10723	0.549868
aPFL1795c_1	aPFL1795c_1::PFL1795c::hypothetical protein	0.394726	0.439222	0.474411	0.736126	0.912595	0.415142	0.378312	0.375893	0.534952	0.577737	0.33767	0.322886	0.378182	0.353513	0.434044
aMAL8P1.109_0	aMAL8P1.109_0::MAL8P1.109::hypothetical protein, conserved	2.24057	2.26256	4.23909	6.50583	8.12461	2.43351	2.42664	3.27422	5.94427	5.87197	2.0294	2.31791	3.1402	4.91049	7.09095
aPFL0570c_1	aPFL0570c_1::PFL0570c::hypothetical protein	0.785192	0.833795	0.818741	0.751038	0.787186	0.841504	0.760511	0.864836	0.690105	0.788898	0.729367	0.782048	0.857056	0.743044	0.606024
aPFE1180c_2	aPFE1180c_2::PFE1180c::hypothetical protein	0.609127	0.71127	0.589188	0.588358	0.669494	0.332862	0.687958	0.788527	0.58667	0.613212	0.762009	0.829929	0.66855	0.84843	1.04358
aMAL13P1.293_0	aMAL13P1.293_0::MAL13P1.293::hypothetical protein	0.369168	0.436107	0.496091	0.618183	0.86629	0.345328	0.408111	0.421113	0.441214	0.640241	0.47724	0.541418	0.506974	0.568288	0.662181
aPF13_0165_0	aPF13_0165_0::PF13_0165::hypothetical protein	0.702839	0.72373	0.777932	0.822888	0.816126	0.847738	0.791605	0.758851	0.670711	0.724705	0.651703	0.660505	0.681429	0.622983	0.632933
aPFL0620c_1	aPFL0620c_1::PFL0620c::choline transporter	1.46673	1.30521	1.11844	0.704945	0.567237	1.50224	1.37462	1.23931	0.961621	0.733151	1.48687	1.38608	1.05024	0.865772	0.721847
aPF13_0319_0	aPF13_0319_0::PF13_0319::hypothetical protein	0.316633	0.306313	0.330302	0.292823	0.287477	0.383975	0.29669	0.317954	0.237577	0.216229	0.31741	0.286055	0.270464	0.250794	0.297162
aPFF0835w_1	aPFF0835w_1::PFF0835w::hypothetical protein	1.17282	1.39243	1.42578	1.0059	0.789115	1.50349	1.44717	1.25203	1.19273	0.97472	1.02877	1.21788	1.07834	1.00985	1.12547
aPFF0095c_1	aPFF0095c_1::PFF0095c::hypothetical protein	1.64848	1.82023	1.98436	2.18397	2.16283	1.65683	1.89545	2.02925	2.06385	2.08796	1.57129	1.8391	2.19064	2.08906	2.44984
aPFE1440c_0	aPFE1440c_0::PFE1440c::hypothetical protein	0.643204	0.734113	0.609592	0.772728	1.28304	0.602143	0.59338	0.665584	0.803237	1.20446	0.485119	0.643317	0.563175	0.900457	1.78414
aPFB0615c_1	aPFB0615c_1::PFB0615c::hypothetical protein	NA	0.574208	1.08528	NA	0.634765	0.503656	0.655568	0.825268	NA	0.772005	0.553779	0.640862	0.714213	0.397535	0.622403
aPF14_0170_4	aPF14_0170_4::PF14_0170::hypothetical protein	0.797971	0.880521	1.399	1.19976	1.34285	0.966172	1.05202	1.15453	1.27193	1.48826	0.87344	0.988303	1.23641	1.0592	1.33021
aMAL13P1.380_0	aMAL13P1.380_0::MAL13P1.380::chloroquine resistance marker protein, putative	2.41663	2.7942	4.41636	4.90479	4.32566	2.32255	3.13662	3.8635	6.01215	7.00548	2.31191	2.77339	4.64356	4.93584	4.72535
aPFL1430c_0	aPFL1430c_0::PFL1430c::hypothetical protein	1.3645	NA	1.61198	1.70543	2.62202	1.88996	1.66354	1.36508	1.20081	1.59131	1.39233	1.42045	1.49985	1.09522	2.15852
aPF14_0529_1	aPF14_0529_1::PF14_0529::gamma-adaptin, putative	1.56044	1.32805	1.26255	0.965233	0.762104	1.63065	1.38239	1.2054	1.0198	0.981477	1.58818	1.39222	1.37574	1.37803	1.22258
aPFF0275c_2	aPFF0275c_2::PFF0275c::nucleoside diphosphate kinase, putative	0.861865	0.840025	0.549653	0.470415	0.926101	0.931265	0.814925	0.847878	0.418588	0.87843	NA	0.789414	0.799684	1.05387	1.88593
aPF14_0714_0	aPF14_0714_0::PF14_0714::hypothetical protein, conserved	0.829208	0.768379	0.918215	1.17401	1.73451	0.962432	0.812334	0.741893	1.11516	1.43421	0.868938	0.782048	0.667379	0.943145	0.979232
aMAL13P1.258_1	aMAL13P1.258_1::MAL13P1.258::hypothetical protein	1.36734	1.5731	1.23449	0.801197	0.534437	1.47481	1.76718	1.37498	0.840408	0.604765	1.51614	1.70897	1.18489	0.665671	0.621233
aPF11_0131_0	aPF11_0131_0::PF11_0131::hypothetical protein	0.637525	0.7175	0.760078	0.657497	0.661776	0.645777	0.751442	0.750372	0.719196	0.64193	0.597676	0.718207	0.5983	0.646995	0.890317
aPF07_0035_0	aPF07_0035_0::PF07_0035::cg1 protein	1.99919	2.11304	1.9206	1.15638	0.983982	2.34001	2.26987	1.93034	1.35273	0.969652	2.18022	2.23442	1.74572	0.904459	0.621233
aMAL7P1.229_1	aMAL7P1.229_1::MAL7P1.229::	2.56714	2.27087	2.82606	2.4524	1.77503	3.00448	2.69871	2.24829	2.98022	2.20452	2.6372	2.72059	2.28548	2.0357	1.54197
aPF14_0035_2	aPF14_0035_2::PF14_0035::hypothetical protein	NA	1.09754	1.00493	1.03844	1.16341	1.00482	1.21526	1.1404	0.938995	1.22811	0.997252	1.18842	1.32656	1.13524	1.27639
aPF14_0715_0	aPF14_0715_0::PF14_0715::hypothetical protein	0.881744	1.17022	0.711616	0.672409	0.760175	0.415142	1.09477	0.754611	0.659397	0.738219	1.07604	1.13317	0.859397	0.733706	0.68675
aPF13_0020_1	aPF13_0020_1::PF13_0020::hypothetical protein	1.25375	1.31974	1.0687	0.782218	0.706152	1.35513	1.26838	1.20116	1.01495	0.848023	1.44523	1.44746	1.2048	1.1259	0.969873
aPF14_0266_0	aPF14_0266_0::PF14_0266::hypothetical protein	NA	1.28652	0.87868	0.57209	0.507426	1.11827	1.22044	1.08387	0.735357	0.697676	1.2989	1.36766	NA	1.11523	0.822462
aPFI0500w_1	aPFI0500w_1::PFI0500w::hypothetical protein	1.23245	1.18995	1.20516	0.999124	0.765963	1.28781	1.23211	1.14464	1.10384	0.944313	1.25276	1.28909	1.10293	0.963155	0.689089
aPFC0430w_1	aPFC0430w_1::PFC0430w::hypothetical protein	0.322312	0.332272	0.439978	0.375519	0.416745	0.375249	0.360174	0.333499	0.320002	0.368265	0.315159	0.37445	0.34774	0.369521	0.525299
achr11tRNALeu1_0	achr11tRNALeu1_0::chr11-tRNA-Leu-1::(tRNA) tRNA-Leu	1.23955	0.953205	4.01464	2.63677	0.889443	0.653257	0.892661	0.943971	0.822631	0.528747	1.2944	0.381816	1.1041	1.25397	11.8467
aPFB0455w_0	aPFB0455w_0::PFB0455w::ribosomal L37ae protein, putative	0.708519	0.571093	0.531799	0.408055	0.333782	0.691904	0.627065	0.500248	0.35879	0.292247	0.599927	0.554923	0.337202	0.26947	0.312372
aMAL13P1.28_1	aMAL13P1.28_1::MAL13P1.28::hypothetical protein	0.526774	0.457912	0.364735	0.33756	0.368511	0.544796	0.501393	0.408395	0.387881	0.341236	0.517761	0.513181	0.362961	0.436221	0.352149
aPFE1510c_1	aPFE1510c_1::PFE1510c::Phosphoenolpyruvate/phosphate translocator precursor, putative	1.92819	1.7465	1.25999	0.916429	0.74281	1.48479	1.86694	1.62793	1.27516	1.01188	2.12957	1.91768	1.44013	1.28198	0.813102
aMAL13P1.308_0	aMAL13P1.308_0::MAL13P1.308::hypothetical protein, conserved	2.0858	2.07982	3.56828	5.5162	7.35479	2.0433	2.18955	2.93366	5.22508	6.72675	2.12507	2.38298	3.31816	4.4756	5.69054
aPFL1930w_4	aPFL1930w_4::PFL1930w::hypothetical protein	1.586	1.77558	2.11189	1.45463	1.25024	2.18292	2.09756	2.22992	1.81334	1.62847	1.65571	1.91645	2.41193	1.5728	1.32436
aPF14_0506_0	aPF14_0506_0::PF14_0506::hypothetical protein	2.41805	2.39236	NA	1.27839	1.21165	3.07305	2.87621	2.80365	2.02021	1.35819	1.50038	2.9158	2.82641	2.26915	1.85083
aMAL13P1.92_0	aMAL13P1.92_0::MAL13P1.92::40S ribosomal protein S15, putative	0.863285	0.740344	0.61852	0.355184	0.40324	0.958692	0.85768	0.666997	0.420204	0.349683	0.778892	0.753811	0.467166	0.342841	0.264404
aPF11_0330_0	aPF11_0330_0::PF11_0330::hypothetical protein	0.282556	NA	NA	NA	0.295195	0.144614	0.279847	0.339151	NA	0.302383	0.283643	0.289738	0.44492	0.437555	NA
aPF13_0010_1	aPF13_0010_1::PF13_0010::Gbph2	1.18844	1.48173	1.19368	0.790352	0.474627	1.43243	1.43551	0.955276	0.589902	0.364886	1.23137	0.838523	1.07483	0.590966	0.573266
aPFI1750c_0	aPFI1750c_0::PFI1750c::hypothetical protein	0.516835	0.461027	0.448905	0.409411	0.501638	0.466256	0.454752	0.534163	0.40081	0.542262	0.352302	0.446885	0.498778	0.534938	0.435214
aMAL8P1.102_1	aMAL8P1.102_1::MAL8P1.102::hypothetical protein	0.753955	0.767341	0.564957	0.383653	0.314488	0.733044	0.675002	0.505901	0.308688	0.21454	0.840799	0.531596	0.434382	0.380193	0.374378
aPFF0040c_0	aPFF0040c_0::PFF0040c::RIFIN pseudogene	NA	0.221169	NA	NA	NA	NA	0.238388	0.264255	NA	NA	NA	0.202571	0.234168	NA	NA
aPF07_0096_0	aPF07_0096_0::PF07_0096::hypothetical protein	1.08053	1.25225	0.529249	0.66292	0.931889	0.425115	0.976874	1.20681	0.796772	1.19602	1.43397	1.18351	0.831297	0.82842	0.540508
aMAL13P1.348_0	aMAL13P1.348_0::MAL13P1.348::hypothetical protein	1.71237	1.49834	1.02661	0.673765	0.735093	1.64062	1.63633	1.29867	0.659397	0.770316	1.8448	1.28172	1.11698	0.832422	0.51126
aMAL7P1.115_1	aMAL7P1.115_1::MAL7P1.115::hypothetical protein	0.874644	1.21798	0.967951	NA	0.9917	1.26413	1.30854	1.16301	0.830711	0.788898	0.927467	1.27067	1.07015	0.723033	0.940625
aPFB0745w_1	aPFB0745w_1::PFB0745w::hypothetical protein	NA	0.398726	0.285667	0.197927	0.270113	0.315408	0.361469	0.34763	0.176163	0.234811	0.373688	0.354807	0.30676	0.258798	0.262065
aMAL13P1.295_3	aMAL13P1.295_3::MAL13P1.295::hypothetical protein	1.11744	1.39554	1.29188	1.05606	0.874008	1.60821	1.47568	1.39193	1.25092	1.04229	1.12219	1.52235	1.49399	1.31934	1.40977
aPFL2540w_0	aPFL2540w_0::PFL2540w::hypothetical protein	0.423123	0.425723	0.593014	0.961166	2.20914	0.519863	0.456047	0.525684	0.895358	1.56766	0.397325	0.384272	0.420332	0.560284	0.542848
aPF07_0035_1	aPF07_0035_1::PF07_0035::cg1 protein	1.89554	2.02271	1.83898	1.06148	0.823844	2.05327	2.10922	1.71413	1.37213	0.937555	2.3243	2.17918	1.66259	0.927137	0.734717
aMAL7P1.124_0	aMAL7P1.124_0::MAL7P1.124::hypothetical protein	0.488438	0.479718	NA	0.250798	0.43218	NA	0.489733	0.573731	NA	NA	0.706856	0.498448	0.44492	0.449561	0.979232
aPFL1295w_1	aPFL1295w_1::PFL1295w::hypothetical protein	2.98742	2.99045	2.95231	2.12975	1.76152	2.75764	3.0252	3.22052	3.20325	2.81098	2.91409	3.36637	3.35329	3.47243	3.00555
aPFL0980w_1	aPFL0980w_1::PFL0980w::hypothetical protein	0.92008	1.06846	0.989631	1.13605	1.14605	1.00856	1.12457	1.17855	1.06506	1.04905	0.99275	1.05583	1.11347	0.984499	0.865749
aPFC0965w_2	aPFC0965w_2::PFC0965w::hypothetical protein	1.1714	1.27821	1.7242	2.20295	2.55642	1.26413	1.34612	1.78054	2.21739	2.67414	1.10868	1.29646	1.51858	1.55679	2.01228
aMAL7P1.138_0	aMAL7P1.138_0::MAL7P1.138::hypothetical protein	1.42272	1.36958	1.50868	1.13605	0.974335	1.57579	1.556	1.46259	1.30587	1.13182	1.20098	1.35661	1.35232	1.30466	1.01082
aPFL1720w_0	aPFL1720w_0::PFL1720w::Serine hydroxymethyltransferase	2.12698	1.71743	1.95631	1.15638	0.89909	2.24276	1.99132	1.65054	1.38506	1.25345	1.94948	1.94223	1.64269	1.21128	1.16642
aMAL7P1.207_3	aMAL7P1.207_3::MAL7P1.207::	2.80852	2.74955	3.26731	2.53509	2.12424	3.01072	2.90341	2.98877	3.18062	2.8228	2.74863	2.77216	3.27484	3.79926	5.03772
aPF13_0165_1	aPF13_0165_1::PF13_0165::hypothetical protein	0.406085	0.374844	0.439978	0.440591	0.555661	0.461269	0.4405	0.395676	0.368487	0.322654	0.36806	0.41742	0.350081	0.31616	0.478502
aPFF0325c_0	aPFF0325c_0::PFF0325c::hypothetical protein, expressed	0.563691	0.591859	0.830219	0.788996	0.827703	0.63331	0.598562	0.630256	0.609296	0.780452	0.565035	0.584388	0.707188	0.831088	1.36765
achr13MALr.2_0	achr13MALr.2_0::chr13-MALr.2::(trna) anticodon	0.354969	0.508792	0.374938	NA	0.677211	NA	NA	0.746133	0.391113	NA	NA	0.468983	0.715384	0.444225	0.552207
aPF08_0030_1	aPF08_0030_1::PF08_0030::hypothetical protein	0.555172	NA	0.772831	0.519219	0.603895	0.735537	NA	NA	0.315153	0.645308	NA	0.531596	0.588933	NA	0.717168
aMAL13P1.312_0	aMAL13P1.312_0::MAL13P1.312::hypothetical protein	2.17099	2.21999	1.88744	1.84777	2.61045	1.39129	2.47457	2.53233	2.13819	2.09641	2.35131	2.25038	1.90613	1.50743	1.81105
aPF13_0031_1	aPF13_0031_1::PF13_0031::hypothetical protein	1.13732	1.07573	0.890158	0.711724	0.692646	1.16439	1.21008	0.949623	0.838792	0.777073	0.987122	1.06442	1.01512	0.851098	0.782684
aPFI0235w_1	aPFI0235w_1::PFI0235w::replication factor A-related protein, putative	2.36835	2.06216	2.10934	1.46547	1.1229	2.38115	2.31004	1.9049	1.59678	1.44265	2.53703	2.50084	1.88857	1.77423	1.00029
aPF11_0127_2	aPF11_0127_2::PF11_0127::hypothetical protein	1.8004	2.32383	2.73551	3.13701	3.46902	2.26645	2.64948	2.73582	3.59275	3.96983	2.06542	2.36702	3.12263	3.32035	3.42205
aPFF0710w_0	aPFF0710w_0::PFF0710w::hypothetical protein, conserved	1.8217	2.22207	2.54167	3.50168	2.73393	1.55585	2.50178	2.75419	5.04245	5.92096	2.19936	2.73533	2.90954	4.67971	4.68206
aPFI0190w_0	aPFI0190w_0::PFI0190w::ribosomal protein L32, putative	0.938539	0.767341	0.46931	0.35654	0.358864	0.830284	0.754033	0.552534	0.449295	0.353061	0.885821	0.762405	0.437895	0.468238	0.256215
aPFC0125w_0	aPFC0125w_0::PFC0125w::ABC transporter, putative	0.725557	0.673889	0.613418	0.516508	0.491991	0.794131	0.702209	0.535576	0.492932	0.430769	0.801404	0.569655	0.526878	0.880447	0.878618
aPFC0320w_1	aPFC0320w_1::PFC0320w::hypothetical protein	1.86288	2.0902	1.96906	1.41125	0.997488	2.32629	2.41757	1.92751	1.51435	1.13182	2.07442	2.29826	1.94008	1.30466	1.12547
aMAL13P1.79_1	aMAL13P1.79_1::MAL13P1.79::hypothetical protein	1.06917	1.04043	1.45001	1.54275	1.65926	1.10829	1.10514	1.22094	1.51435	1.76024	1.08617	1.09757	1.26568	1.53144	1.16291
aMAL8P1.113_4	aMAL8P1.113_4::MAL8P1.113::hypothetical protein	1.30913	1.53468	1.68977	1.02624	1.03993	1.43991	1.62337	1.765	1.09738	1.03891	1.497	1.60829	1.68016	1.13524	1.98069
aPFF1020c_0	aPFF1020c_0::PFF1020c::hypothetical protein, conserved	2.5643	2.84819	2.32487	2.52289	1.92166	2.71525	2.36834	2.42776	3.62022	4.13369	2.38733	2.94035	3.09219	4.17679	2.75402
aPFC1045c_1	aPFC1045c_1::PFC1045c::hypothetical protein	0.719878	0.909595	1.93845	5.22473	10.4823	0.766704	0.803265	1.44139	4.07598	6.20814	0.671964	0.826245	1.58883	3.18828	4.96051
aPF14_0531_1	aPF14_0531_1::PF14_0531::hypothetical protein	1.96795	2.05593	2.26876	1.52241	1.24638	2.25772	2.13902	2.43765	1.88607	1.55246	1.77164	2.10429	2.16606	2.15576	2.41942
aPFA0310c_0	aPFA0310c_0::PFA0310c::calcium-transporting ATPase	1.67262	1.58556	1.94866	1.1957	0.89716	1.93234	1.70888	1.60108	1.39152	1.0727	1.62194	1.76544	1.77265	1.53678	1.71512
aMAL13P1.73_1	aMAL13P1.73_1::MAL13P1.73::hypothetical protein	0.749695	0.706078	0.652953	0.479905	0.439898	0.623336	0.826586	0.637322	0.546265	0.457797	0.689973	0.76486	0.711871	0.609643	0.627083
aPF11_0291_1	aPF11_0291_1::PF11_0291::hypothetical protein	0.912981	0.924131	1.04192	1.09809	1.3988	0.898851	0.987239	1.00191	1.09738	1.21798	0.971364	1.03373	1.30549	1.18994	0.907866
aMAL13P1.45_0	aMAL13P1.45_0::MAL13P1.45::hypothetical protein, conserved	1.10608	1.13492	1.33141	0.920496	0.825773	1.30277	1.19712	1.10648	1.06667	0.969652	1.03777	1.14422	1.10762	1.1219	0.944134
aPFL2015w_0	aPFL2015w_0::PFL2015w::hypothetical protein	1.17992	1.07988	1.45256	1.34753	1.17306	1.42869	1.44717	1.54596	1.55799	1.45448	1.12557	1.38485	1.45887	1.62883	1.16057
aPFB0615c_0	aPFB0615c_0::PFB0615c::hypothetical protein	0.634685	0.697771	NA	NA	0.617401	0.567236	0.608927	0.788527	0.787075	0.614901	NA	0.516864	0.605325	0.409541	0.809592
aPF10_0333_1	aPF10_0333_1::PF10_0333::hypothetical protein	NA	0.564862	0.468034	NA	NA	0.388962	0.410702	0.624603	NA	0.54564	0.476115	0.416192	0.483557	0.705691	1.33372
aPF14_0596_1	aPF14_0596_1::PF14_0596::hypothetical protein	NA	NA	0.316274	NA	0.83542	NA	NA	NA	NA	NA	NA	0.180473	NA	0.213442	0.138052
aPF14_0555_0	aPF14_0555_0::PF14_0555::hypothetical protein	1.96227	1.70912	1.57882	0.932697	0.823844	1.88372	1.63503	1.77348	1.05213	0.744976	1.89545	1.7458	1.4015	1.0592	0.794383
aPF14_0260_0	aPF14_0260_0::PF14_0260::hypothetical protein	1.68681	1.36335	1.63493	1.9264	3.10051	1.60945	1.31891	1.02735	1.75678	1.892	2.05303	1.02882	1.15094	1.59147	0.979232
aPFL0130c_1	aPFL0130c_1::PFL0130c::hypothetical protein, conserved	1.5931	1.88564	2.39884	2.31547	2.27088	1.84882	2.06517	2.25536	2.66022	2.97991	1.5848	1.95819	2.23865	2.33985	2.59608
aPF11_0164_0	aPF11_0164_0::PF11_0164::peptidyl-prolyl cis-trans isomerase	2.97038	2.54292	3.08367	1.50614	1.06502	3.13414	3.10423	2.71604	2.09132	1.68422	2.94223	2.90966	2.26089	1.68219	1.26587
aPF13_0235_5	aPF13_0235_5::PF13_0235::hypothetical protein	0.533874	0.515022	0.617244	0.607337	0.721587	0.617103	0.576537	0.617538	0.57374	0.631794	0.570663	0.627357	0.622887	0.692351	NA
aPFL1875w_0	aPFL1875w_0::PFL1875w::hypothetical protein	1.53773	1.73716	1.1618	1.14147	1.36021	1.15691	1.46272	1.5064	1.30425	1.42069	1.40246	1.50885	1.32656	1.86761	1.41328
aMAL8P1.13_1	aMAL8P1.13_1::MAL8P1.13::integral membrane protein	3.943	3.88447	4.8066	4.66755	3.80473	4.6264	3.95025	NA	5.28003	4.76548	3.88771	4.16806	4.40002	3.82994	1.68938
aPFF1300w_0	aPFF1300w_0::PFF1300w::pyruvate kinase, putative	0.9215	0.863907	0.974328	0.505663	0.43218	1.05718	0.963918	0.723523	0.492932	0.400361	0.859933	0.844661	0.610008	0.417545	0.471482
aMAL7P1.119_1	aMAL7P1.119_1::MAL7P1.119::hypothetical protein	3.01298	2.87934	4.53623	5.2288	4.20218	4.17635	4.33115	4.48386	5.12488	6.55444	3.00526	5.14163	2.87559	3.88731	3.68411
aPF10_0359_0	aPF10_0359_0::PF10_0359::hypothetical protein	NA	0.634432	0.636374	0.543621	0.827703	0.519863	0.645203	0.628843	0.544649	0.662201	0.65508	NA	0.525708	0.516262	0.558057
aPFB0655c_0	aPFB0655c_0::PFB0655c::hypothetical protein	0.34645	0.362384	0.392792	0.497529	0.551802	0.337848	0.349809	0.41546	0.402426	0.449351	0.323038	0.327797	0.354765	0.437555	0.531149
aPFE1150w_2	aPFE1150w_2::PFE1150w::multidrug resistance protein	0.846247	0.845217	0.845523	1.07369	2.02778	0.920045	0.795492	0.688194	0.903439	1.59638	0.771013	0.929373	0.865252	1.20328	1.28341
aPF11_0375_1	aPF11_0375_1::PF11_0375::hypothetical protein	1.10324	1.06016	1.10568	1.17401	1.38143	0.973652	1.06238	1.03158	1.27516	1.23149	1.24488	1.08161	1.11347	1.23129	0.930095
aPF13_0310_0	aPF13_0310_0::PF13_0310::hypothetical protein	0.492697	0.502561	0.576435	0.618183	0.690717	0.593416	0.619292	0.614712	0.468689	0.606455	0.52564	0.54019	0.505803	0.513594	0.586135
aPFE0415w_0	aPFE0415w_0::PFE0415w::transcription factor iib, putative	1.92819	2.21272	1.87979	1.25941	1.08045	1.21052	2.2608	2.61429	1.59678	1.38015	2.30854	2.37929	2.24919	1.15659	1.95028
aPF11_0348_0	aPF11_0348_0::PF11_0348::hypothetical protein	1.78337	1.81192	1.87596	1.55495	1.27532	1.76903	1.86306	2.04056	1.99597	2.08458	1.85268	1.93241	1.99745	2.34119	1.68002
aPF10_0220_0	aPF10_0220_0::PF10_0220::hypothetical protein	2.14117	2.1878	2.41541	2.68286	4.06327	2.16547	2.12477	2.36558	3.22911	4.46986	1.67147	2.18286	1.86749	2.29183	1.253
aPF14_0217_1	aPF14_0217_1::PF14_0217::hypothetical protein	0.981135	0.888828	0.882506	0.746971	0.665635	1.01853	0.984648	0.836573	0.753135	0.731462	0.918463	0.982164	0.962431	0.935141	1.07517
aPF13_0058_0	aPF13_0058_0::PF13_0058::hypothetical protein	1.24097	1.44123	3.48539	6.20894	12.3114	1.21925	1.49122	2.44754	5.45296	7.07305	1.06028	1.40572	2.15435	3.57381	4.68206
aPFA0130c_0	aPFA0130c_0::PFA0130c::Serine/Threonine protein kinase, putative	0.283975	NA	0.297144	0.283334	0.281689	0.225648	0.224137	0.25295	0.223031	0.255083	0.384944	0.187839	0.169772	0.273472	0.311202
aMAL13P1.164_0	aMAL13P1.164_0::MAL13P1.164::elongation factor tu, putative	1.13874	1.00616	0.929692	0.691389	0.663706	0.906331	1.05979	0.969407	0.670711	0.613212	1.14695	1.05951	0.780951	0.675009	0.531149
aPF10_0114_1	aPF10_0114_1::PF10_0114::DNA repair protein RAD23, putative	0.92008	0.92517	0.803438	0.582936	0.555661	1.02103	0.873227	0.821028	0.669094	0.586183	0.960109	0.881492	0.679088	0.680345	0.404796
aMAL8P1.98_0	aMAL8P1.98_0::MAL8P1.98::hypothetical protein	0.413184	0.39665	0.408095	0.338916	0.37044	0.447556	0.485846	0.498835	0.389497	0.49834	0.512133	0.570883	0.524537	1.25397	2.69435
aPF10_0023_0	aPF10_0023_0::PF10_0023::hypothetical protein	0.129209	0.117334	0.104574	0.154546	0.324135	0.140874	0.128263	0.101745	0.108283	0.177375	0.112557	0.1019	0.0983506	0.170753	0.239836
aPFE0040c_1	aPFE0040c_1::PFE0040c::Mature parasite-infected erythrocyte surface antigen (MESA) or PfEMP2	0.0440162	0.0602243	0.0484613	0.0637162	0.0675282	0.0561003	0.0518236	0.0466333	0.0404043	0.0540573	0.0382693	0.041742	0.0362961	0.0373523	0.0690259
aPF10_0040_0	aPF10_0040_0::PF10_0040::hypothetical protein	0.843407	NA	1.02789	1.19027	1.21165	0.676943	0.970396	0.932666	0.979399	1.09635	0.835171	1.00303	1.05493	1.10856	1.91869
aPF10_0080_0	aPF10_0080_0::PF10_0080::endonuclease, putative	2.7574	3.25004	2.2254	1.70136	1.53	2.03457	3.46311	3.38303	2.99315	2.47312	3.31817	3.5628	NA	3.16427	1.51506
aPF14_0359_0	aPF14_0359_0::PF14_0359::hypothetical protein, conserved	0.555172	0.614703	0.601941	0.489395	0.443757	0.713097	0.676297	0.534163	0.426669	0.412187	0.617936	0.611397	0.44492	0.429551	0.427025
aPF14_0568_0	aPF14_0568_0::PF14_0568::hypothetical protein	0.4643	0.556556	0.383865	0.309091	0.40131	0.408909	0.548034	0.493182	0.310305	0.439215	NA	0.530369	0.485899	0.617647	1.12664
aPFB0195c_1	aPFB0195c_1::PFB0195c::hypothetical protein	0.732656	0.743459	0.673357	0.587003	0.517073	0.946225	0.812334	0.661345	0.512326	0.418944	0.802529	0.788187	0.639279	0.432219	0.425855
aMAL7P1.19_3	aMAL7P1.19_3::MAL7P1.19::hypothetical protein	1.05355	1.21279	1.70125	1.54952	1.37565	1.12201	1.30336	1.5926	1.79233	2.29405	1.22237	1.37994	1.85461	2.06371	2.48376
aPF13_0161_1	aPF13_0161_1::PF13_0161::hypothetical protein	0.540973	0.570054	1.34544	4.52656	6.9882	0.650763	0.671115	1.08952	3.01577	4.08301	0.407455	0.550012	1.13337	2.45458	5.54313
aPF14_0281_1	aPF14_0281_1::PF14_0281::aspartyl protease, putative	1.98357	2.23661	2.67813	3.20615	2.51784	1.79022	1.95375	2.32177	3.34386	4.21815	1.95061	2.03922	2.23162	2.41723	2.92132
aPF14_0402_1	aPF14_0402_1::PF14_0402::hypothetical protein	1.49229	1.51911	1.80455	2.02536	1.61296	1.66306	1.79828	2.07024	2.48567	2.87179	1.40471	1.69914	2.57	3.01886	2.16905
aPFA0705c_0	aPFA0705c_0::PFA0705c::STEVOR pseudogene	0.752535	0.722692	0.353258	0.424323	0.845067	0.845244	0.971692	1.30715	0.522023	0.913905	NA	0.793097	NA	0.987167	0.425855
aPFC1015c_2	aPFC1015c_2::PFC1015c::hypothetical protein	1.11602	1.22421	1.06998	0.672409	0.542155	1.17686	1.20231	0.958102	0.698185	0.516922	1.10643	1.17982	0.858226	0.689683	0.494881
aPF10_0125_1	aPF10_0125_1::PF10_0125::hypothetical protein	0.80507	0.573169	0.498642	0.530065	0.600036	0.926278	0.73719	0.760264	0.471922	0.616591	0.595425	0.967432	0.70953	0.833756	1.05879
aPFA0370w_0	aPFA0370w_0::PFA0370w::hypothetical protein	1.70385	2.04763	1.44236	0.906939	1.03029	1.46359	1.87472	1.7975	1.22506	1.27035	1.52514	NA	NA	1.39938	1.02603
aPF14_0283_0	aPF14_0283_0::PF14_0283::hypothetical protein	0.596348	0.581476	0.522872	0.42839	0.405169	0.484956	0.594675	0.538403	0.395962	NA	NA	0.597892	0.537416	0.621649	0.67271
aMAL8P1.113_7	aMAL8P1.113_7::MAL8P1.113::hypothetical protein	1.67545	1.84515	NA	1.07233	1.16148	1.93359	1.90581	1.97414	1.34142	1.29737	1.42497	2.13007	NA	1.39804	0.942964
aPFC0416w_0	aPFC0416w_0::PFC0416w::hypothetical protein	1.60872	1.35505	1.36967	0.883893	0.885584	1.60073	1.6169	1.45128	1.14425	NA	1.0963	1.67582	1.56541	NA	1.04826
aPF07_0038_0	aPF07_0038_0::PF07_0038::Cg7	1.55761	1.97702	1.92315	1.21874	0.870149	1.71044	2.07942	1.90349	1.41253	1.04567	1.62194	1.87716	1.84993	1.28999	1.78648
aPFE0500c_2	aPFE0500c_2::PFE0500c::hypothetical protein	2.1	2.21584	2.73551	2.54458	1.56665	2.62425	2.52122	2.66092	2.5891	2.29574	2.10143	2.64448	2.67069	2.57331	2.79263
aPFL0120c_0	aPFL0120c_0::PFL0120c::cyclophilin, putative	1.17424	1.17126	1.45001	1.4004	1.91973	1.32895	1.20878	1.29725	1.48203	1.55584	1.18972	1.24858	1.42023	1.5061	1.14887
aPF08_0102_0	aPF08_0102_0::PF08_0102::asparagine-rich antigen Pfa55-14	0.790871	0.762149	0.677183	0.719858	0.534437	1.04222	0.899139	0.806897	0.698185	0.672337	0.858808	0.908502	0.83598	0.845762	0.827141
aMAL13P1.43_0	aMAL13P1.43_0::MAL13P1.43::hypothetical protein	0.454361	0.453759	0.402994	0.318581	0.320277	0.482462	0.435318	0.412634	0.311921	0.293936	0.500877	0.428469	0.394573	0.360183	0.356829
aMAL7P1.76_1	aMAL7P1.76_1::MAL7P1.76::hypothetical protein	0.215821	0.179635	0.184918	0.197927	0.291336	0.226894	0.198225	0.172402	0.15192	0.180754	0.231867	0.191522	0.170943	0.20277	0.246855
aPF14_0767_0	aPF14_0767_0::PF14_0767::stevor, putative	0.35071	0.345771	0.386415	0.324004	0.561449	0.312915	0.344627	NA	NA	NA	NA	NA	NA	0.365519	0.288973
aPF14_0736_1	aPF14_0736_1::PF14_0736::hypothetical protein	1.07343	0.952167	0.970502	0.836445	1.27146	1.05718	0.966509	1.15029	0.971318	1.20615	0.993876	0.95761	1.11347	0.889785	0.85522
aPF14_0341_0	aPF14_0341_0::PF14_0341::glucose-6-phosphate isomerase	0.487018	0.407033	0.348156	0.25622	0.237313	0.541056	0.458639	0.330672	0.305456	0.256772	0.500877	0.446885	0.30676	NA	0.267914
aPF11_0469_1	aPF11_0469_1::PF11_0469::hypothetical protein	0.597768	0.577323	0.601941	0.551755	0.6502	0.71933	0.655568	0.628843	0.55273	0.555776	0.492998	0.637179	0.632254	0.444225	0.50424
aPFC0520w_0	aPFC0520w_0::PFC0520w::26S proteasome regulatory subunit S14, putative	1.79046	1.50145	1.60432	1.47361	1.1229	2.05576	1.87731	1.86957	2.30304	1.8447	1.65008	1.67827	1.52326	1.83693	1.29043
aMAL13P1.295_0	aMAL13P1.295_0::MAL13P1.295::hypothetical protein	1.33042	1.62502	1.71017	1.24721	0.879796	NA	1.66095	1.464	1.3495	1.11662	1.41709	1.68564	1.85695	1.65551	2.51301
aPFD0487c_1	aPFD0487c_1::PFD0487c::	2.18945	2.22726	2.29681	2.27887	NA	2.49584	2.35797	2.24688	2.32244	2.29743	2.37495	2.03922	2.05366	1.85161	1.49166
aMAL7P1.77_0	aMAL7P1.77_0::MAL7P1.77::hypothetical protein	1.91115	1.89707	1.73058	0.8378	0.605824	2.09815	2.15327	1.5389	0.917985	0.714569	1.87407	1.97169	1.57829	0.767056	0.575606
aMAL8P1.72_0	aMAL8P1.72_0::MAL8P1.72::high mobility group protein, putative	2.94199	1.90537	1.04319	0.900161	0.746669	1.90866	1.80476	1.89501	1.73577	1.73321	2.49201	1.88698	1.19894	2.21712	0.444574
aPF13_0217_0	aPF13_0217_0::PF13_0217::hypothetical protein	1.71947	1.42669	1.71655	1.11842	1.01099	1.49601	2.19214	2.01936	1.61617	1.15716	1.88758	2.07605	1.77734	1.02852	0.949984
aPF14_0181_0	aPF14_0181_0::PF14_0181::calmodulin, putative	0.80365	0.713346	0.619795	0.527353	0.451474	0.795377	0.752737	0.603406	0.520407	0.407119	0.538021	0.730485	0.604154	0.574958	0.439894
aPFI0415c_0	aPFI0415c_0::PFI0415c::ribosomal RNA methyltransferase, putative	0.542393	0.404956	0.437427	0.446013	0.37237	0.387715	0.38479	0.490356	0.276365	0.312518	0.343298	NA	NA	0.364185	0.51594
aPFE0230w_0	aPFE0230w_0::PFE0230w::hypothetical protein	0.817849	0.844179	0.860826	0.752394	1.10553	0.896358	0.730712	0.764503	0.659397	0.846334	0.999504	0.624902	0.828955	0.923135	1.15472
aPF11_0049_2	aPF11_0049_2::PF11_0049::hypothetical protein, conserved	1.23529	1.47757	1.65406	1.33126	1.47983	1.38755	1.42644	1.33541	1.27031	1.49502	1.4835	1.55427	1.71411	1.16859	1.15823
aPF11_0509_0	aPF11_0509_0::PF11_0509::ring-infected erythrocyte surface antigen, putative	0.0397566	0.0332272	0.0905462	0.361962	0.883655	0.0299202	0.0297985	0.0621777	0.197173	0.434147	0.0303903	0.0294649	0.0667379	0.120061	0.133372
aPF11_0436_0	aPF11_0436_0::PF11_0436::hypothetical protein	1.19128	1.06846	0.953923	0.932697	0.542155	0.902591	1.14012	0.914295	1.19758	0.88012	1.11769	1.07056	0.823101	1.06587	1.14419
aPFB0805c_0	aPFB0805c_0::PFB0805c::clathrin coat assembly protein, putative	1.45111	1.23564	1.68467	1.93453	1.80976	1.48603	1.28522	1.43715	1.88445	1.77713	1.22462	1.26208	1.40735	1.81559	1.82041
aPFE0980c_2	aPFE0980c_2::PFE0980c::hypothetical protein	0.934279	0.969819	1.07125	0.955743	0.733163	1.10206	0.995012	0.881793	0.832328	0.790587	0.953355	0.969887	0.892181	0.78173	0.856389
aPF14_0729_0	aPF14_0729_0::PF14_0729::hypothetical protein	0.482758	0.271009	0.311173	0.332138	0.169785	0.194481	0.259118	0.494595	NA	0.273665	NA	0.146097	0.168601	0.177423	0.109974
aMAL13P1.262_2	aMAL13P1.262_2::MAL13P1.262::hypothetical protein	0.789452	1.41942	1.17455	0.771373	0.551802	1.31025	1.37851	1.30573	1.01334	0.795655	1.01751	1.43028	1.3734	0.947147	0.820122
aPF11_0392_0	aPF11_0392_0::PF11_0392::hypothetical protein	3.42616	3.10986	3.25456	2.26667	1.91587	3.43334	3.79478	3.93274	3.47477	3.90226	3.21237	4.17788	4.89529	5.58683	5.67651
aPF14_0535_0	aPF14_0535_0::PF14_0535::hypothetical protein	0.935699	0.959435	0.947546	1.11164	1.4451	1.03848	1.0287	1.16583	1.1394	1.47475	0.921839	0.923234	1.15796	1.30866	1.41094
aPFF1595c_3	aPFF1595c_3::PFF1595c::erythrocyte membrane protein 1 (PfEMP1)	0.211562	0.296968	0.349432	NA	NA	0.306682	NA	0.300997	NA	0.293936	0.136194	0.170651	0.259927	0.165417	NA
aPF10_0140_1	aPF10_0140_1::PF10_0140::hypothetical protein	1.25517	1.81088	1.44491	1.73525	1.61296	1.82638	1.8799	1.5601	2.00405	1.87004	1.30003	2.42226	2.15083	2.26782	2.20298
aPF10_0132_2	aPF10_0132_2::PF10_0132::phospholipase C-like, putative	NA	1.22421	1.37732	1.3516	1.45282	1.23047	1.12587	1.42444	1.4691	1.87849	1.3428	1.33452	1.42843	1.84894	1.13015
aMAL13P1.206_1	aMAL13P1.206_1::MAL13P1.206::phosphate transporter, putative	1.64564	1.46927	1.83388	1.61595	2.81689	1.7042	1.52232	1.6364	1.79718	2.76874	1.57692	1.67827	1.34178	1.53811	1.31617
aPF10_0183_3	aPF10_0183_3::PF10_0183::hypothetical protein	1.22819	1.25537	1.66681	1.6512	1.87343	1.45487	1.32409	1.45411	1.61779	1.6082	1.23812	1.294	1.46472	1.34602	1.92454
aMAL13P1.301_0	aMAL13P1.301_0::MAL13P1.301::guanylyl cyclase	NA	NA	NA	0.325359	0.455333	0.342835	NA	0.507314	NA	0.400361	NA	NA	0.360619	0.364185	0.377888
aPFD1070w_0	aPFD1070w_0::PFD1070w::eukaryotic initiation factor	0.495537	0.408072	0.559856	NA	0.46498	0.579703	0.437909	0.341977	0.397578	0.314208	0.486245	0.462845	0.448432	0.57229	0.401286
aPFI0660c_1	aPFI0660c_1::PFI0660c::protease, putative	1.48945	1.61879	1.13757	0.749682	0.715799	1.04845	1.499	1.41454	0.882429	0.753423	1.7345	1.13194	1.40852	1.10323	0.691429
aPF11_0304_2	aPF11_0304_2::PF11_0304::hypothetical protein	2.23063	2.55538	3.19717	3.42576	2.12617	2.55194	2.48364	2.90257	3.88204	3.82793	1.98437	2.8495	2.97862	3.87263	3.23135
aPF10_0156_1	aPF10_0156_1::PF10_0156::hypothetical protein	1.43266	1.72262	2.0137	4.92513	6.2589	1.13198	1.45236	2.17481	3.41982	3.98334	1.33042	1.34065	2.34168	4.05939	2.66744
aMAL7P1.87_1	aMAL7P1.87_1::MAL7P1.87::hypothetical protein	3.7286	3.74741	3.50069	2.74793	2.00848	2.95586	4.00078	3.88611	3.97739	3.66745	3.85732	4.43079	4.51242	4.80377	3.13659
aPF11_0203_0	aPF11_0203_0::PF11_0203::hypothetical protein	0.58215	0.612626	0.548378	0.435168	NA	0.442569	0.602449	0.57797	0.473538	0.52199	0.679842	0.645773	0.552637	NA	0.652822
aPF13_0036_0	aPF13_0036_0::PF13_0036::DNAJ protein, putative	1.04645	1.02174	1.41813	1.09267	1.31584	1.13572	1.00149	1.00474	0.885661	0.820994	0.937597	0.964976	0.901548	0.721699	0.733547
aPFD0540c_1	aPFD0540c_1::PFD0540c::hypothetical protein	0.542393	0.484909	0.505018	0.39721	0.380087	0.542303	0.526009	0.558186	0.405659	0.417254	0.473864	0.421103	0.470678	0.5923	0.636442
aPFF1470c_1	aPFF1470c_1::PFF1470c::DNA polymerase epsilon, catalytic subunit a, putative	1.3361	1.56791	1.14012	1.56172	1.39494	1.21426	NA	1.86251	1.5289	1.56428	1.62419	1.88207	1.61342	1.23796	1.01667
aMAL13P1.301_1	aMAL13P1.301_1::MAL13P1.301::guanylyl cyclase	NA	0.221169	0.482063	0.437879	0.710011	0.193234	0.370538	0.425352	0.32485	0.586183	0.495249	0.375678	0.396915	0.522932	1.26587
aPFB0235w_0	aPFB0235w_0::PFB0235w::hypothetical protein	NA	0.269971	0.321375	0.277911	0.511285	0.307928	NA	0.432418	NA	0.241568	0.239746	0.236947	0.44609	0.349511	NA
aPFI0410c_2	aPFI0410c_2::PFI0410c::hypothetical protein	1.32333	NA	1.36584	1.90064	2.50433	1.32147	1.56248	1.79185	2.79597	4.54588	1.33042	1.85629	1.90379	2.56397	1.93039
aPFI0010c_0	aPFI0010c_0::PFI0010c::rifin	NA	0.154714	0.223177	0.226396	0.196796	0.125914	NA	0.204904	NA	NA	NA	0.139958	0.200214	0.212108	0.33109
aPFI0695c_1	aPFI0695c_1::PFI0695c::phospholipid or glycerol acyltransferase, putative	0.783772	0.807836	0.92204	1.27026	1.63418	0.784157	0.743668	0.992017	1.48849	NA	0.837422	0.840978	1.00107	1.62082	1.36765
aPFD0872w_5	aPFD0872w_5::PFD0872w::	1.36876	1.40696	1.00493	1.07369	1.42388	0.865191	1.33964	1.72119	1.03273	1.76362	NA	1.418	1.43311	1.51277	0.817782
aPF14_0453_0	aPF14_0453_0::PF14_0453::hypothetical protein	2.69635	1.86592	1.0789	0.77544	0.621259	1.61319	1.9965	1.70989	1.27516	1.25514	2.56742	1.88453	1.1123	1.10589	0.301842
aMAL8P1.150_1	aMAL8P1.150_1::MAL8P1.150::hypothetical protein	2.60973	3.00602	3.31833	3.96667	4.50895	2.03831	2.98245	4.45136	4.92932	6.76729	2.25901	2.95018	4.8426	5.53347	4.41883
aPFI0240c_2	aPFI0240c_2::PFI0240c::E1-E2_ATPase/hydrolase, putative	2.04888	2.09954	1.95758	1.17129	0.918383	2.1742	2.26469	2.20448	1.60971	1.2467	2.03277	2.24424	2.20235	1.76756	1.73618
aPF10_0262_2	aPF10_0262_2::PF10_0262::hypothetical protein	0.479918	0.631317	1.44109	5.27624	14.2214	0.405169	0.537669	1.20823	3.73982	7.69133	0.30728	0.519319	1.16616	2.77474	4.05264
aPFF0245w_0	aPFF0245w_0::PFF0245w::50S ribosomal subunit L24, putative	0.594928	0.553441	0.573884	0.494817	0.484274	0.59591	0.515644	0.624603	0.284446	0.434147	0.567286	0.472666	0.393403	0.342841	0.566247
aPF11_0197_1	aPF11_0197_1::PF11_0197::hypothetical protein	1.6357	1.64682	1.54694	0.984212	0.702293	1.875	1.76589	1.43574	1.05051	0.778762	1.64783	1.71388	1.38276	0.825752	0.884468
aPF10_0219_0	aPF10_0219_0::PF10_0219::hypothetical protein	0.438742	0.376921	0.40682	0.481261	0.800691	0.445062	0.430136	0.433831	0.45576	0.66558	0.420962	0.428469	0.367644	0.528268	0.50541
aPF08_0074_0	aPF08_0074_0::PF08_0074::hypothetical protein, conserved	0.833468	1.02693	0.881231	0.557178	0.574954	0.915058	1.087	0.829507	0.544649	0.520301	0.872314	1.05828	0.789147	0.49225	0.539338
aPFD0200c_0	aPFD0200c_0::PFD0200c::hypothetical protein	NA	0.838987	0.817466	0.589714	0.764033	0.820311	0.746259	0.901577	0.601215	0.734841	0.772139	0.80783	0.755192	0.836424	0.827141
aPF14_0291_0	aPF14_0291_0::PF14_0291::hypothetical protein	0.472819	0.404956	0.36346	0.637162	1.53193	0.471242	0.388677	0.401329	0.480002	1.08452	0.44685	0.430924	0.427357	0.705691	0.835331
aPFC0560c_1	aPFC0560c_1::PFC0560c::hypothetical protein	0.366328	NA	0.414472	0.401277	0.447615	0.306682	0.411997	0.363174	0.316769	0.30914	0.371437	0.407598	0.395744	0.300152	0.360339
aPF13_0232_0	aPF13_0232_0::PF13_0232::Casein kinase II regulatory subunit, putative	1.32191	1.09857	0.765179	0.589714	0.563378	1.42495	1.06238	0.818202	0.610912	0.52368	1.24713	1.17737	0.875789	0.664337	0.436384
aPFB0665w_2	aPFB0665w_2::PFB0665w::Ser/Thr protein kinase, putative	0.397566	0.52852	1.17455	3.44474	6.18944	0.383975	0.47289	0.989191	2.72325	3.78232	0.356805	0.457934	0.913256	2.20378	3.82099
aPFE0635c_1	aPFE0635c_1::PFE0635c::hypothetical protein	0.728397	0.585629	0.695037	0.61276	0.561449	0.658243	0.641317	0.611885	NA	0.464554	0.460357	0.602803	0.619375	NA	0.769815
aPFB0315w_0	aPFB0315w_0::PFB0315w::41 kDa antigen	1.1785	1.40904	2.39884	5.11356	7.57473	0.956198	1.18158	2.33732	3.54103	5.24355	0.935346	1.20806	2.16723	4.38889	5.55717
aMAL7P1.67_0	aMAL7P1.67_0::MAL7P1.67::hypothetical protein	1.72231	1.5378	1.47807	1.05606	0.845067	1.56333	1.60783	1.59684	1.24283	1.03722	1.50713	1.666	1.30783	0.996505	0.824801
aMAL13P1.175_0	aMAL13P1.175_0::MAL13P1.175::MSP7 fragment, pseudogene	2.86389	3.06106	2.29044	1.97791	1.56665	4.11651	3.03427	2.90963	3.00123	2.51873	2.79703	3.14661	2.92125	2.94683	2.36092
aPFE1615c_0	aPFE1615c_0::PFE1615c::hypothetical protein	0.0851926	0.0602243	0.0777932	0.10303	0.12541	0.0885138	NA	0.0833747	0.119597	NA	0.0810408	0.0785731	0.0655671	0.122729	0.153261
aPFA0495c_0	aPFA0495c_0::PFA0495c::selenocysteine-specific elongation factor selB homologue, putative	0.531034	0.600166	0.526698	0.45008	0.563378	0.60339	0.585606	0.707978	NA	0.503408	0.639322	0.759949	0.525708	0.522932	0.458613
aPFL1295w_0	aPFL1295w_0::PFL1295w::hypothetical protein	3.50994	2.9105	2.49703	2.0945	1.54543	3.5767	3.37242	2.64821	2.98668	2.48663	3.10544	3.17607	2.89432	3.97935	2.75051
aPFF0265c_0	aPFF0265c_0::PFF0265c::calcium-binding protein, putative	1.65274	1.9033	0.850624	1.13062	0.964688	NA	1.89415	2.12252	1.39637	1.26528	1.87182	1.8477	1.8593	1.67685	0.893827
aPF11_0442_1	aPF11_0442_1::PF11_0442::hypothetical protein	0.942798	1.29794	2.21774	5.46875	9.95366	0.805351	0.987239	1.72967	4.48002	6.76391	0.68547	0.962521	1.66845	3.54046	6.62883
aPFF1440w_0	aPFF1440w_0::PFF1440w::SET-domain protein, putative	1.42414	1.80673	1.78669	1.44649	1.43932	1.63564	1.78143	2.10132	1.76647	1.3717	1.39233	1.99257	2.03024	1.52211	1.62035
aPF14_0263_0	aPF14_0263_0::PF14_0263::hypothetical protein	NA	1.45057	1.00238	1.21739	NA	1.17437	1.33316	1.4852	1.16526	2.2079	1.54315	1.53954	2.16488	2.31984	1.88476
aPFE0610c_0	aPFE0610c_0::PFE0610c::CDK-activating kinase assembly factor, putative	0.648884	0.722692	0.665706	0.523286	0.484274	0.567236	0.706096	0.57797	0.559195	NA	NA	0.656822	0.632254	0.628319	0.864579
aPF14_0529_0	aPF14_0529_0::PF14_0529::gamma-adaptin, putative	1.27931	1.16191	1.21153	0.855424	0.717728	1.42619	1.35	1.20257	0.992328	0.917284	1.23475	1.32224	1.29027	1.322	1.39222
aPF11_0089_1	aPF11_0089_1::PF11_0089::hypothetical protein	0.305274	NA	0.420848	0.262999	0.405169	0.296708	0.404224	0.609059	NA	0.613212	NA	0.309382	0.578395	0.632321	4.13922
aMAL8P1.132_1	aMAL8P1.132_1::MAL8P1.132::hypothetical protein	0.905882	0.955282	0.552204	0.780862	1.18271	0.785404	0.672411	1.2266	0.766065	NA	0.632569	1.07915	1.23055	1.24997	1.30915
aPFI1230c_0	aPFI1230c_0::PFI1230c::hypothetical protein	NA	0.54098	0.34178	NA	NA	0.59591	0.507871	0.618951	0.286062	0.645308	0.521138	0.629813	0.491753	0.885783	0.474992
aMAL7P1.31_0	aMAL7P1.31_0::MAL7P1.31::hypothetical protein	0.611967	0.566939	0.70779	0.391787	0.410957	0.508643	0.607631	0.497422	0.374951	0.322654	0.638196	0.595437	0.483557	0.372189	0.368528
aPF11_0390_1	aPF11_0390_1::PF11_0390::reticulocyte binding protein, putative	0.935699	0.567977	0.594289	0.393143	0.569166	0.532329	0.458639	0.676889	0.313537	0.454419	2.53815	0.495993	0.540929	0.481578	0.456273
aPF13_0273_3	aPF13_0273_3::PF13_0273::hypothetical protein, conserved	0.482758	0.543057	0.562406	0.444658	0.426392	0.66323	0.585606	0.527097	0.387881	0.331101	0.506505	0.572111	0.516341	0.364185	0.529979
aPFL2435w_0	aPFL2435w_0::PFL2435w::hypothetical protein	1.67545	1.55129	1.59795	0.835089	0.667564	1.63813	1.88767	1.37215	0.924449	0.746666	2.00126	1.85138	1.22587	0.920467	NA
aPFA0675w_1	aPFA0675w_1::PFA0675w::P. falciparum RESA-like protein with DnaJ domain	2.3073	3.43486	1.79179	2.6815	NA	2.03457	2.42793	2.94638	2.19314	3.45291	2.25113	2.15831	2.68942	2.02103	1.91518
aPFC0490w_0	aPFC0490w_0::PFC0490w::hypothetical protein	0.46572	0.432992	0.53435	0.738837	1.19235	0.265541	0.469003	0.477638	0.636771	0.92742	0.551528	0.495993	0.454286	0.53894	0.903187
aPF14_0147_0	aPF14_0147_0::PF14_0147::ATP-dependent protease, putative	0.966936	1.35712	0.756252	0.713079	0.953112	0.728057	1.09607	1.01887	0.661014	NA	1.14358	1.20192	0.912085	1.20461	1.81222
aPFC0875w_1	aPFC0875w_1::PFC0875w::hypothetical protein	0.452941	0.472449	0.604491	1.52241	2.98861	0.194481	0.424953	0.806897	1.32526	2.25858	0.413083	0.473894	0.667379	0.889785	0.625913
aPFL1435c_1	aPFL1435c_1::PFL1435c::myosin d	1.94949	2.25426	4.17022	5.67616	9.63531	1.84258	NA	3.77871	5.64043	7.019	1.84931	2.29458	3.26899	4.65303	4.23281
aPF11_0067_0	aPF11_0067_0::PF11_0067::hypothetical protein	0.271197	0.264779	0.419573	0.896094	1.7866	0.302942	0.283734	0.306649	0.557579	1.25345	0.261132	0.255363	0.258756	0.400203	0.520619
aPFE0365c_0	aPFE0365c_0::PFE0365c::hypothetical protein	1.48945	1.41839	2.59651	4.94953	7.34707	1.68176	1.68945	2.34862	4.01133	4.04416	1.11994	1.69178	2.05834	3.12425	2.77742
aPFL1735c_1	aPFL1735c_1::PFL1735c::hypothetical protein	0.868965	0.827565	0.925866	0.707657	0.682999	1.0684	0.925051	0.846465	0.665862	0.64193	0.80478	0.98953	0.929648	0.844428	0.945304
aPFD0255w_0	aPFD0255w_0::PFD0255w::Plasmodium yoelii blood stage membrane protein ag-1	NA	1.91576	1.80072	2.13246	2.18791	1.83386	2.03537	1.85403	2.56163	3.09309	1.66922	2.21969	1.84173	2.33318	2.78093
aPFC0100c_0	aPFC0100c_0::PFC0100c::regulatory protein, putative	0.589249	0.524367	0.663155	0.544977	0.58846	0.645777	0.542852	0.514379	0.381416	0.452729	NA	0.529141	0.544441	0.616313	0.546358
aPF14_0307_0	aPF14_0307_0::PF14_0307::hypothetical protein, conserved	NA	0.456874	0.538176	0.584291	0.630906	0.473736	0.491028	0.549708	0.564043	0.557465	0.480617	0.484943	0.517512	0.584296	0.480842
aMAL8P1.106_0	aMAL8P1.106_0::MAL8P1.106::hypothetical protein	2.98884	2.92711	2.92298	3.56946	3.25872	2.96085	2.96301	3.43391	5.19437	5.9463	2.69798	3.51983	3.89422	5.87098	2.23808
aPFI1130c_0	aPFI1130c_0::PFI1130c::DNA-directed RNA polymerase II, putative	0.640365	0.617818	0.476961	0.391787	0.468839	0.627077	0.554512	0.466333	0.381416	0.390226	0.603304	0.538963	0.443749	0.454897	0.3346
aPF14_0047_1	aPF14_0047_1::PF14_0047::hypothetical protein	0.897362	0.917901	0.881231	NA	0.854714	1.11203	0.948371	0.81255	0.696569	0.976409	0.791274	1.09511	0.93316	0.857768	0.899677
aPF14_0497_1	aPF14_0497_1::PF14_0497::hypothetical protein	NA	0.569016	0.752426	0.409411	0.486203	0.59965	0.790309	0.659932	0.360406	0.579426	NA	0.579477	0.586591	0.57229	1.05528
aPFA0180w_1	aPFA0180w_1::PFA0180w::hypothetical protein	NA	0.924131	0.839146	0.772728	0.912595	0.786651	1.02352	0.946797	0.677175	0.832819	1.02201	1.02145	0.908573	0.648329	0.575606
aPF10_0030_1	aPF10_0030_1::PF10_0030::hypothetical protein	0.9286	0.929323	0.883782	0.676476	0.669494	1.20179	1.15826	0.938318	0.783842	0.670648	1.1008	1.14054	0.764559	0.626985	0.606024
aPFF1195c_0	aPFF1195c_0::PFF1195c::hypothetical protein, conserved	0.374848	NA	NA	0.375519	0.779468	0.65575	0.601153	0.682542	0.341012	0.954448	NA	0.756266	0.676746	0.693685	0.620063
aPFF1065c_1	aPFF1065c_1::PFF1065c::hypothetical protein	0.678701	0.967742	0.647851	0.57209	0.968547	0.445062	0.938006	0.917121	0.774145	1.06256	0.921839	0.872898	0.944869	1.08588	1.19216
aPF14_0404_3	aPF14_0404_3::PF14_0404::hypothetical protein	0.407505	0.456874	0.445079	0.475838	NA	NA	0.404224	0.791353	NA	NA	0.276889	0.292194	0.393403	0.320162	0.467972
aPFE1320w_2	aPFE1320w_2::PFE1320w::hypothetical protein	0.630425	0.582514	0.68356	0.50024	0.472697	0.775431	0.665933	0.659932	0.470305	0.420633	0.680968	0.696109	0.639279	0.561618	0.866919
aMAL13P1.52_1	aMAL13P1.52_1::MAL13P1.52::hypothetical protein	0.778093	0.847294	1.12226	0.973367	0.962759	0.875164	0.836951	0.95245	0.976167	0.780452	0.900454	0.9306	0.830126	0.789734	1.00731
aPFB0545c_0	aPFB0545c_0::PFB0545c::ribosomal protein L7/L12, putative	0.586409	0.482833	0.715442	0.57209	0.6502	0.70811	0.612814	0.520032	NA	0.486515	0.540272	0.538963	0.511658	0.486914	0.493711
aPFD0285c_3	aPFD0285c_3::PFD0285c::amino acid decarboxylase, putative	0.504056	0.565901	0.516496	0.623605	0.825773	0.388962	NA	0.661345	0.51071	NA	0.471613	0.565972	0.66855	1.06721	1.23077
aPF14_0099_0	aPF14_0099_0::PF14_0099::hypothetical protein, conserved	1.15436	1.63021	1.22556	0.783574	2.02778	1.18933	1.44717	1.7113	1.15233	1.94775	1.4306	NA	1.78085	1.35135	0.865749
aPFD0225w_2	aPFD0225w_2::PFD0225w::hypothetical protein	0.674442	0.806798	1.09676	0.993702	1.00135	0.751744	0.834359	0.973647	1.04728	1.17068	0.589797	0.934283	1.26568	1.28732	1.99239
aMAL8P1.60_0	aMAL8P1.60_0::MAL8P1.60::hypothetical protein	0.68864	NA	0.665706	0.460926	0.625118	0.552276	NA	0.542642	0.189092	0.442594	0.336545	0.245541	0.270464	0.526934	0.707808
aPFF1440w_7	aPFF1440w_7::PFF1440w::SET-domain protein, putative	1.50081	1.96144	2.14378	1.79083	1.67084	2.49584	2.26469	2.30905	NA	1.6403	1.75138	2.21478	2.19416	1.39137	1.02252
aPF14_0258_0	aPF14_0258_0::PF14_0258::hypothetical protein	3.47728	3.56362	2.87197	1.96165	1.93709	NA	3.2908	3.24031	2.28042	2.0508	3.19548	2.96245	2.40959	1.82493	1.84264
aPFL1760w_1	aPFL1760w_1::PFL1760w::hypothetical protein	1.28357	1.05912	1.1618	0.719858	0.600036	1.44739	1.23599	1.01745	0.785459	0.623348	1.21786	1.20929	0.962431	0.847096	0.944134
aPFL0465c_1	aPFL0465c_1::PFL0465c::Zinc finger transcription factor (krox1)	1.85578	2.32694	2.68195	2.66524	2.74743	1.99468	2.76479	2.73441	3.4279	3.40392	1.95849	2.53398	NA	3.30034	3.36589
aPFL1470c_0	aPFL1470c_0::PFL1470c::hypothetical protein	0.362069	0.317735	0.311173	0.357895	0.389734	0.330368	0.304463	0.368827	0.286062	0.307451	0.333168	0.308154	0.276318	0.350845	0.456273
aPFF0280w_0	aPFF0280w_0::PFF0280w::hypothetical protein,conserved	0.846247	NA	0.633823	0.437879	0.748598	0.846491	0.567468	0.739067	0.405659	1.10817	NA	0.78082	0.729434	1.59414	1.27873
aPFD0250c_1	aPFD0250c_1::PFD0250c::hypothetical protein	1.84584	1.72678	2.17056	1.72983	1.38143	2.17544	1.98484	1.70565	1.93132	1.92072	2.20499	1.99625	2.10166	2.68936	2.49429
aPFI0630w_0	aPFI0630w_0::PFI0630w::26S proteasome regulatory subunit, putative	1.53915	1.69251	1.3735	1.04793	0.769821	1.69672	1.69074	1.399	1.42061	1.08114	1.58142	1.52726	1.34764	1.21262	0.926585
aPFC0765c_0	aPFC0765c_0::PFC0765c::hypothetical protein	1.96653	1.67071	1.70252	1.29873	1.08431	2.05078	1.81512	1.70989	1.57253	1.33961	1.24037	1.99502	1.68484	1.63683	1.55601
aPF14_0649_2	aPF14_0649_2::PF14_0649::hypothetical protein	2.24341	2.30929	2.92426	1.92775	1.50877	2.60555	2.51344	2.58461	2.47759	2.00012	1.76939	2.38666	3.13785	2.57197	1.99005
aPFL2255w_0	aPFL2255w_0::PFL2255w::hypothetical protein	2.10994	1.92925	2.02517	1.58613	1.52035	2.52701	2.37093	2.45743	2.03153	1.52712	2.24776	2.39157	2.39671	1.84894	1.06815
aPF13_0121_1	aPF13_0121_1::PF13_0121::dihydrolipoamide succinyltransferase, putative	0.870385	0.827565	0.774106	0.551755	0.578813	0.840258	0.807152	0.747546	0.541417	0.581115	0.858808	0.779593	0.746997	0.931139	1.33138
aPFD0230c_0	aPFD0230c_0::PFD0230c::protease, putative	2.28174	2.36848	2.94339	2.9811	3.16804	2.59931	2.5847	2.69201	3.10305	3.59312	2.03953	2.42717	2.40959	3.20029	2.78912
aMAL13P1.157_1	aMAL13P1.157_1::MAL13P1.157::hypothetical protein	0.438742	0.432992	0.358359	0.738837	1.58209	0.350315	0.441796	0.435244	0.837176	1.38522	0.334293	0.477577	0.482386	0.7884	0.916056
aMAL7P1.43_0	aMAL7P1.43_0::MAL7P1.43::RIF pseudogene	1.16004	0.733075	NA	0.497529	0.89909	0.721824	0.624474	0.730588	0.648084	0.772005	0.909458	0.595437	NA	0.763054	0.237496
aPF07_0130_0	aPF07_0130_0::PF07_0130::stevor	0.860445	1.05496	0.94117	0.889316	0.792974	0.852724	1.04554	1.41878	1.0392	1.17575	1.02652	1.07547	1.34647	1.35535	0.813102
aPF14_0140_1	aPF14_0140_1::PF14_0140::hypothetical protein	1.28073	1.28444	1.75481	2.48222	3.14296	1.4611	1.4977	1.6901	2.66991	3.16066	1.28427	1.4536	1.77265	2.54262	2.41942
atRNA_RNAGly2_0	atRNA_RNAGly2_0::tRNA_RNA-Gly2::	1.87282	1.53468	1.32376	1.12791	0.530579	1.40749	1.1155	0.908643	0.631922	0.327722	1.78065	0.97357	0.736459	0.713695	0.446914
aPF11_0440_0	aPF11_0440_0::PF11_0440::hypothetical protein	1.75639	1.49938	1.36457	1.05335	1.01678	1.70919	1.80864	1.46966	1.32203	1.06087	1.43847	1.59479	1.58649	1.48876	0.964023
aMAL13P1.151_3	aMAL13P1.151_3::MAL13P1.151::hypothetical protein	1.3787	1.47965	1.24724	0.713079	0.792974	1.78025	1.6169	1.58271	0.935762	0.95107	1.95511	1.89803	1.87335	1.33401	1.09389
aPF11_0240_6	aPF11_0240_6::PF11_0240::dynein heavy chain, putative	0.194523	0.168213	0.109676	NA	0.210302	0.105967	NA	0.333499	0.119597	0.19089	0.183467	0.198888	0.216606	0.194765	0.308862
aPF11_0044_0	aPF11_0044_0::PF11_0044::hypothetical protein	0.908721	0.916863	0.784308	0.534132	0.513214	1.14694	0.958736	0.734828	0.551114	0.391915	0.904956	0.988303	0.830126	0.684347	0.665691
aPF11_0309_0	aPF11_0309_0::PF11_0309::hypothetical protein	0.765314	0.871176	0.575159	0.454147	0.439898	0.720577	0.878409	0.599167	0.509094	0.410497	0.879068	0.836067	0.547954	0.506924	0.587305
aPF13_0242_0	aPF13_0242_0::PF13_0242::isocitrate dehydrogenase (NADP), mitochondrial precursor	1.25943	1.17749	1.32503	0.890671	0.704223	1.43741	1.2036	0.984952	0.984248	0.88012	1.14245	1.2142	0.956577	1.15659	0.902017
aPFL1960w_0	aPFL1960w_0::PFL1960w::erythrocyte membrane protein 1 (PfEMP1)	0.444421	0.426762	0.461658	0.421611	0.378158	0.448802	0.32001	0.479051	0.425053	0.488205	NA	0.49231	0.581908	NA	0.148581
aPFL1050w_1	aPFL1050w_1::PFL1050w::hypothetical protein	NA	1.80258	1.74588	1.21196	1.05344	2.22032	2.09756	2.00099	1.45617	NA	1.73337	1.99625	1.6263	1.10723	1.06464
aPFD1115c_0	aPFD1115c_0::PFD1115c::hypothetical protein	0.819269	0.977087	0.944996	1.03302	1.23866	0.775431	NA	0.914295	0.998793	1.28048	0.836296	0.753811	0.826614	0.955151	0.980402
aPFB0680w_1	aPFB0680w_1::PFB0680w::hypothetical protein	2.24057	2.76513	3.33363	4.06292	4.06713	2.82621	2.81143	3.20074	4.65619	5.36856	1.95736	2.49347	2.92242	2.76674	1.91284
aPF11_0450_0	aPF11_0450_0::PF11_0450::hypothetical protein	0.406085	0.44026	NA	0.287401	0.636694	0.240608	0.419771	0.775808	0.192324	0.587873	0.625815	0.413737	0.518683	NA	0.462123
aPFD0985w_0	aPFD0985w_0::PFD0985w::hypothetical protein	0.597768	0.797453	1.27912	3.83246	8.51627	0.582196	0.71387	0.986365	2.65375	5.16416	0.598802	0.703475	1.18606	2.39855	4.54986
aPF11_0070_0	aPF11_0070_0::PF11_0070::hypothetical protein	0.734076	0.71127	0.646576	0.516508	0.659847	0.541056	0.642612	0.661345	0.441214	0.457797	0.61456	0.580704	0.526878	0.542942	0.765135
aPFA0330w_0	aPFA0330w_0::PFA0330w::pfAARP2 protein	NA	0.570054	0.882506	0.843223	1.16534	0.647023	0.694436	0.76733	0.785459	0.837887	0.319661	0.730485	NA	0.84843	0.972213
aPF07_0087_0	aPF07_0087_0::PF07_0087::hypothetical protein	1.70527	1.69874	1.40155	0.706301	0.538296	1.89245	1.91358	1.41878	0.903439	0.623348	1.75363	1.69914	1.04556	0.59897	0.459783
aPFF1060w_0	aPFF1060w_0::PFF1060w::hypothetical protein	1.41562	1.08196	0.590463	0.39721	0.584601	1.38505	1.13494	0.866249	0.41374	0.511855	0.737246	1.22279	0.564345	0.622983	0.286633
aPFL0305c_0	aPFL0305c_0::PFL0305c::hypothetical protein	1.45679	1.96456	1.70507	1.58206	2.14933	1.70171	2.00428	2.3246	1.85375	2.74003	2.54603	2.34001	1.9436	1.81826	2.36677
aPF11_0290_0	aPF11_0290_0::PF11_0290::hypothetical protein	0.92008	0.903365	1.38115	4.17409	6.28012	0.706864	0.831768	1.47389	3.87881	5.3787	0.810408	0.83975	1.18723	3.11225	3.85609
aPF14_0458_0	aPF14_0458_0::PF14_0458::hypothetical protein	0.567951	NA	0.637649	0.793063	0.974335	0.62957	0.672411	0.881793	NA	0.790587	0.593174	0.67401	0.764559	NA	1.92571
aMAL7P1.215_0	aMAL7P1.215_0::MAL7P1.215::	0.558012	NA	0.172165	NA	NA	NA	0.300577	0.323607	0.137374	0.260151	NA	0.329025	0.196701	0.266802	0.133372
aPF13_0072_0	aPF13_0072_0::PF13_0072::hypothetical protein	1.83448	2.18157	2.76612	2.85232	2.85355	2.44099	2.31004	NA	3.20487	3.09478	NA	2.12393	2.92593	3.12158	3.47703
aPF11_0313_0	aPF11_0313_0::PF11_0313::ribosomal phosphoprotein P0	0.911561	0.804721	0.751151	0.395854	0.337641	1.02726	0.851202	0.589275	0.418588	0.383469	0.848678	0.91464	0.679088	0.554948	0.394267
aPF13_0121_0	aPF13_0121_0::PF13_0121::dihydrolipoamide succinyltransferase, putative	0.971196	1.05496	0.973052	0.826955	0.856643	0.878904	0.95744	1.01887	1.21536	0.890255	0.954481	0.906046	0.868764	0.992503	1.19099
aPFL2510w_1	aPFL2510w_1::PFL2510w::chitinase	0.736916	0.80576	0.734572	0.873048	1.15956	0.900098	0.866749	1.11637	0.947076	1.13013	0.798027	0.795553	1.06078	1.23663	1.0155
aMAL7P1.144_1	aMAL7P1.144_1::MAL7P1.144::hypothetical protein, conserved	0.0511156	0.0436107	0.0637649	NA	0.0675282	0.0523603	0.0492324	0.0466333	0.0517174	0.0506787	NA	0.0503359	0.0608837	0.0667005	0.0631763
aPFC0340w_0	aPFC0340w_0::PFC0340w::DNA polymerase delta small subunit, putative	0.785192	0.796414	NA	0.504307	NA	1.07463	0.882296	0.739067	0.517174	0.527058	0.889198	NA	0.667379	0.602973	0.405966
aPF14_0005_0	aPF14_0005_0::PF14_0005::rifin	NA	0.218053	NA	NA	NA	NA	NA	NA	NA	NA	NA	NA	NA	NA	NA
aPFD0170c_0	aPFD0170c_0::PFD0170c::hypothetical protein	2.73894	2.86273	2.35548	1.49259	1.31776	3.19522	2.56268	2.39808	1.60324	1.85146	2.474	2.78443	2.66952	2.45591	2.43229
aMAL8P1.149_1	aMAL8P1.149_1::MAL8P1.149::hypothetical protein	NA	NA	1.17327	1.58342	2.74743	0.339095	0.659455	1.24921	1.19112	1.9089	0.647201	0.86676	0.975311	1.40071	3.28166
aPFE0485w_1	aPFE0485w_1::PFE0485w::phosphatidylinositol 4-kinase	1.07485	1.00408	1.33396	2.08094	2.9423	1.04222	1.22822	1.40041	1.98789	2.35656	1.0873	1.18965	1.29612	1.42205	0.823631
aPF10_0285_0	aPF10_0285_0::PF10_0285::hypothetical protein	0.271197	0.653122	0.27929	0.342983	0.360794	0.346575	0.288916	0.282626	0.195557	0.234811	0.898202	0.187839	0.176797	0.184093	0.263234
aPFL0115w_1	aPFL0115w_1::PFL0115w::hypothetical protein	1.04645	1.18891	0.976878	0.787641	1.11904	1.57205	1.4381	1.46542	0.964853	1.10986	1.15258	1.45483	1.61225	1.09522	1.03656
aPF14_0414_2	aPF14_0414_2::PF14_0414::hypothetical protein, conserved	1.66126	1.64682	1.60177	1.01539	1.18657	1.84009	1.68427	1.58553	1.24607	1.07946	1.75251	1.8477	1.59351	1.12057	1.32904
aPF13_0041_1	aPF13_0041_1::PF13_0041::hypothetical protein	1.32617	1.29378	1.51633	1.92911	3.251	1.2554	1.34223	1.53042	1.92486	2.54914	1.40471	1.36521	1.55839	1.85161	2.05206
aPF13_0258_2	aPF13_0258_2::PF13_0258::sexual stage-specific protein kinase	1.66836	1.99156	2.10934	1.8559	1.55894	1.77277	2.02112	2.40797	2.42102	2.38697	1.91121	1.92627	2.77372	2.74806	2.29189
aPFL1190c_0	aPFL1190c_0::PFL1190c::hypothetical protein	NA	1.41527	NA	1.52783	1.3988	1.34017	1.44847	1.63499	1.69698	2.20283	1.22912	1.42414	1.53614	2.28783	1.87774
aPF10_0374_5	aPF10_0374_5::PF10_0374::gene 11-1 protein precursor	0.496957	0.60432	0.604491	0.517864	0.995558	0.532329	0.668524	0.780048	0.51071	0.917284	0.478366	0.678921	0.824272	NA	0.734717
aPFF0740c_1	aPFF0740c_1::PFF0740c::hypothetical protein	1.68255	1.9386	1.35819	0.965233	0.997488	2.13929	1.92395	1.97132	1.44001	1.2771	1.35856	2.05518	1.97755	NA	1.09389
aPFL1055c_1	aPFL1055c_1::PFL1055c::hypothetical protein	0.380527	0.38419	0.49354	0.660208	0.9917	0.421375	0.397746	0.491769	0.812934	1.10986	0.386069	0.44934	0.533903	0.921801	1.18748
aPFD0985w_4	aPFD0985w_4::PFD0985w::hypothetical protein	0.633265	0.879482	1.43599	4.69331	9.65653	0.63331	0.739781	1.16442	3.11113	5.90913	0.562783	0.763632	1.19894	2.30117	3.1553
aPFI0990c_0	aPFI0990c_0::PFI0990c::hypothetical protein	1.94807	1.81296	1.34927	0.89745	0.812268	1.97473	2.06387	1.5926	1.08283	1.03722	2.09581	2.13498	1.63332	1.17526	0.830651
aPFD0615c_3	aPFD0615c_3::PFD0615c::erythrocyte membrane protein 1 (PfEMP1)	0.11217	0.175481	NA	NA	0.106116	0.236868	NA	NA	NA	NA	0.0990499	0.0773454	0.0772755	0.0747046	NA
aMAL13P1.57_0	aMAL13P1.57_0::MAL13P1.57::hypothetical protein	1.1643	1.07885	0.948822	0.831022	0.771751	1.38007	1.1168	0.946797	0.938995	0.888566	1.09293	1.07301	0.989361	0.944479	0.706638
aPF08_0060_2	aPF08_0060_2::PF08_0060::asparagine-rich antigen	0.57931	0.588744	0.619795	0.657497	0.696505	0.664477	0.589493	0.628843	0.631922	0.765248	0.693349	0.557378	0.866422	0.968491	1.23545
aPFE1120w_13	aPFE1120w_13::PFE1120w::hypothetical protein	4.49107	5.39838	7.33934	9.50185	8.16319	4.67128	5.30414	6.94695	10.3306	11.3047	5.28454	5.58483	7.18545	6.65271	3.96841
aPFA0340w_1	aPFA0340w_1::PFA0340w::hypothetical protein	1.62434	NA	1.7089	1.51563	1.20972	1.80892	2.10404	1.7113	1.81334	1.45279	1.71874	2.07359	1.68133	1.45807	1.6847
aPF10_0372_0	aPF10_0372_0::PF10_0372::hypothetical protein	2.0219	2.2906	2.39628	1.55766	1.39301	2.36369	2.19861	1.9911	1.87152	1.5305	2.1836	2.0073	1.871	1.31133	1.04592
aPFA0725w_2	aPFA0725w_2::PFA0725w::hypothetical protein	0.569371	0.743459	0.49354	0.669698	NA	0.563496	0.953554	1.15453	0.698185	1.05243	0.45698	NA	1.05259	2.80142	3.76601
aPF10_0286_1	aPF10_0286_1::PF10_0286::hypothetical protein	0.207302	0.208708	0.206598	0.18437	0.173644	0.231881	0.218955	0.186533	0.143839	0.146968	0.245374	0.233264	0.16743	0.162749	0.382567
aPFF0385c_1	aPFF0385c_1::PFF0385c::hypothetical protein	0.800811	0.767341	0.996008	0.568023	0.926101	0.61087	0.741077	0.794179	0.678791	0.802412	0.930844	0.847116	0.772755	1.18727	0.925415
aPFF0350w_0	aPFF0350w_0::PFF0350w::MYND finger protein, putative	1.17992	1.19722	1.1618	1.17536	1.17113	1.27659	1.19453	1.1842	1.15071	1.21629	1.24488	1.08406	1.31134	1.40471	1.29979
aMAL13P1.29_0	aMAL13P1.29_0::MAL13P1.29::hypothetical protein	2.5288	2.94891	2.4575	2.00909	1.62646	3.0718	3.10553	2.74712	2.56971	2.61333	2.39296	3.35163	3.51838	3.03354	2.57736
aMAL8P1.113_8	aMAL8P1.113_8::MAL8P1.113::hypothetical protein	1.01379	1.47653	1.52143	0.9693	1.02064	1.02726	1.72832	1.58412	1.11839	1.13351	1.69173	1.69423	1.54668	1.10723	1.08219
aPFI0410c_3	aPFI0410c_3::PFI0410c::hypothetical protein	1.41988	1.46927	1.58902	2.24769	2.52941	1.6481	1.77884	2.26242	2.81537	4.67257	1.48012	1.78017	2.12508	2.98018	2.28605
aPF13_0033_1	aPF13_0033_1::PF13_0033::26S proteasome regulatory subunit, putative	1.70527	1.78077	2.13995	1.37464	1.20007	2.1904	1.92136	1.9261	1.97173	1.27879	1.63545	1.99993	1.95648	1.58881	0.972213
aPF10_0272_0	aPF10_0272_0::PF10_0272::ribosomal protein L3, putative	0.883163	0.724768	0.68611	0.409411	0.461121	0.984872	0.818812	0.579383	0.442831	0.432458	0.773265	0.800464	0.558491	0.421547	0.458613
aPFF1510w_1	aPFF1510w_1::PFF1510w::hypothetical protein, conserved in Plasmodium falciparum	0.661663	0.620933	0.814915	0.793063	0.609683	0.619596	0.617996	0.818202	0.538185	0.815927	NA	0.502131	0.601812	1.71554	4.29248
aPFL1645w_1	aPFL1645w_1::PFL1645w::hypothetical protein	0.887423	0.95632	1.2957	1.0642	0.908737	1.19182	1.06497	1.14887	1.00687	0.989923	0.931969	1.04969	1.27036	1.10056	1.10675
aPF14_0647_0	aPF14_0647_0::PF14_0647::hypothetical protein	1.6286	2.02478	2.51489	3.33358	4.67295	1.5733	2.11311	2.63407	3.96285	4.85502	1.63095	1.94837	2.75031	3.26032	2.73881
aPF13_0125_0	aPF13_0125_0::PF13_0125::hypothetical protein	0.46714	0.476603	0.777932	1.95351	3.29152	0.477476	0.453456	0.548294	1.51597	2.22479	NA	0.489854	0.61235	1.2433	1.50219
aPF11_0149_0	aPF11_0149_0::PF11_0149::hypothetical protein	0.941378	0.884674	0.956473	1.06284	1.34671	0.976145	0.862862	0.771569	0.884045	0.988234	0.866687	0.880264	0.738801	0.745712	0.698449
aMAL7P1.57_0	aMAL7P1.57_0::MAL7P1.57::rifin	0.513995	NA	0.317549	NA	NA	0.236868	0.312237	0.431005	NA	0.244947	0.285894	0.245541	0.396915	0.234786	0.139222
aPFE0435c_0	aPFE0435c_0::PFE0435c::single-strand binding protein, putative	1.12454	1.25744	1.43471	0.925919	0.733163	1.40999	1.48345	1.23508	1.06829	0.83113	1.32479	1.27927	1.04088	1.06721	1.53261
aPF11_0482_0	aPF11_0482_0::PF11_0482::hypothetical protein	0.57363	0.821335	0.804713	0.481261	0.625118	0.958692	0.849906	0.805484	0.42182	0.532126	0.619062	0.827473	0.75168	0.77506	0.781514
aPF07_0102_0	aPF07_0102_0::PF07_0102::hypothetical protein	0.69858	0.619895	0.622345	0.493462	0.472697	0.613363	0.627065	0.69526	0.415356	0.410497	0.623564	0.55124	0.495266	0.529602	0.321731
aPFI1135c_0	aPFI1135c_0::PFI1135c::hypothetical protein	0.942798	0.730998	0.689936	0.690033	0.987841	0.714344	0.598562	0.890272	0.499397	0.73653	0.648327	0.596665	0.556149	0.667005	NA
aPFI0175w_0	aPFI0175w_0::PFI0175w::hypothetical protein	0.705679	0.952167	1.941	4.7028	7.30076	0.857711	0.949667	1.69152	3.55719	3.93604	0.649452	0.909729	1.38979	2.628	3.34951
aPFL1550w_1	aPFL1550w_1::PFL1550w::lipoamide dehydrogenase	2.67505	2.82743	2.12465	2.35343	1.98147	2.07945	2.42793	2.78952	3.23234	2.83125	2.31191	2.41858	3.12615	3.51245	2.33986
aPFB0315w_2	aPFB0315w_2::PFB0315w::41 kDa antigen	1.30913	1.56791	1.84791	4.13206	5.65307	1.19805	1.50418	1.96284	2.9382	3.56271	1.51051	1.56778	2.24333	2.72005	3.83035
aPFI0585c_2	aPFI0585c_2::PFI0585c::hypothetical protein	0.873224	0.944899	0.786859	0.597848	0.520932	0.991105	0.900434	0.778635	0.588286	0.491583	NA	1.02022	0.847689	0.632321	0.707808
aPF14_0334_3	aPF14_0334_3::PF14_0334::NAD(P)H-dependent glutamate synthase, putative	1.93387	2.26879	2.52254	3.09634	4.80029	2.04953	2.22453	2.65668	3.92891	4.99523	1.32479	2.24179	3.22333	4.53563	5.33606
aPF14_0216_0	aPF14_0216_0::PF14_0216::hypothetical protein	NA	1.51807	NA	1.39905	NA	NA	2.36056	2.40797	2.1188	2.51873	1.6951	2.49715	2.33466	2.28916	NA
aPF07_0086_3	aPF07_0086_3::PF07_0086::hypothetical protein	1.96937	1.93964	1.99457	1.60104	1.42002	2.32754	2.05869	2.1098	1.61294	1.51867	1.72099	NA	2.04429	1.64884	1.41211
aPF11_0242_2	aPF11_0242_2::PF11_0242::asparagine-rich protein	2.00913	2.14212	2.71383	3.46237	2.99053	2.11436	2.55231	3.11595	4.47356	4.62696	1.77277	2.47751	4.69039	5.09325	5.28341
aPF14_0419_3	aPF14_0419_3::PF14_0419::hypothetical protein	1.60588	1.95833	1.57754	1.21739	2.06636	1.70545	2.01853	2.03208	1.64526	2.06938	1.62082	1.93118	2.21523	1.65817	0.886808
aMAL13P1.348_1	aMAL13P1.348_1::MAL13P1.348::hypothetical protein	1.13732	1.01031	0.869753	0.559889	0.800691	1.35638	1.27875	0.958102	0.615761	0.621658	1.35181	1.21297	0.812564	0.58563	0.459783
aPF10_0232_1	aPF10_0232_1::PF10_0232::hypothetical protein	1.03367	1.22421	1.40538	1.82337	2.38471	1.25914	1.28782	1.36084	1.69375	2.10992	1.04903	1.3382	1.78319	1.82493	1.82977
aPFL1075w_1	aPFL1075w_1::PFL1075w::hypothetical protein	1.34036	1.9656	1.93463	1.62137	1.41423	1.56457	1.75941	1.54172	1.75193	1.56597	1.65233	1.80718	1.77851	2.08906	1.84264
aPFL1290w_1	aPFL1290w_1::PFL1290w::hypothetical protein	0.289655	0.429877	0.468034	0.360607	0.542155	0.430102	0.489733	0.467746	0.40081	0.440904	0.381567	0.486171	0.470678	0.652331	0.899677
aPFF0470w_0	aPFF0470w_0::PFF0470w::hypothetical protein	0.407505	NA	NA	NA	0.544084	0.316655	0.290212	0.336325	NA	0.625037	NA	0.370767	0.288027	0.346843	0.33577
aPFF0655c_0	aPFF0655c_0::PFF0655c::adapter-related protein, putative	1.26937	1.33532	1.28933	0.973367	0.995558	1.57953	1.30207	1.24638	1.18304	1.28217	1.37995	1.5776	1.43077	1.44073	2.43346
aPFL0710w_0	aPFL0710w_0::PFL0710w::hypothetical protein	0.871805	0.725807	0.51522	0.53142	0.573025	0.750497	0.664637	0.579383	0.481619	0.511855	0.562783	0.65805	0.647475	0.634989	0.403626
aMAL13P1.256_0	aMAL13P1.256_0::MAL13P1.256::phosphatidylinositol transfer protein, putative	0.81359	0.998893	1.18348	1.36786	1.33706	0.785404	0.928937	1.22236	1.62748	1.64537	0.694475	0.870443	1.27622	1.21128	1.08336
aPF08_0111_1	aPF08_0111_1::PF08_0111::hypothetical protein	0.742596	0.960474	0.886332	0.832378	0.760175	1.08461	0.974283	0.822442	0.746671	0.85647	0.62469	0.974798	1.10762	1.22596	1.32319
aPF14_0495_3	aPF14_0495_3::PF14_0495::hypothetical protein	3.67038	4.23128	4.78747	5.66261	4.28901	3.51811	3.75721	4.44288	5.69538	6.38213	3.73238	4.00477	4.77352	4.2715	2.65574
aPF10_0250_1	aPF10_0250_1::PF10_0250::hypothetical protein	0.599188	NA	0.350707	0.489395	0.771751	0.492436	0.553216	0.849291	0.447679	0.837887	0.716986	0.535279	NA	0.873777	1.17695
aPFC1025w_0	aPFC1025w_0::PFC1025w::F49C12.11-like protein	1.63286	1.39139	0.957749	0.582936	0.503567	1.5359	1.21915	0.946797	0.57374	0.59294	1.12444	1.18105	0.738801	0.57896	0.437554
aPF11_0528_0	aPF11_0528_0::PF11_0528::hypothetical protein	2.14827	2.45362	2.49193	1.81795	1.86957	2.6043	2.36445	2.72875	2.92688	2.38528	1.8358	2.58555	2.79011	2.74139	2.35507
aPFD0625c_3	aPFD0625c_3::PFD0625c::erythrocyte membrane protein 1 (PfEMP1)	0.965516	1.09961	0.761353	1.06013	1.35442	0.863944	1.16473	1.20681	0.895358	1.10986	1.2325	1.21543	NA	0.951149	0.868089
aPF14_0045_0	aPF14_0045_0::PF14_0045::hypothetical protein	0.123529	0.11318	0.145384	0.252154	0.657918	0.123421	0.119194	0.115877	0.166466	0.413876	0.118185	0.120315	0.108888	0.174755	0.311202
aPF07_0106_0	aPF07_0106_0::PF07_0106::hypothetical protein	0.322312	0.32085	NA	0.574802	0.765963	0.408909	0.371834	0.416873	0.659397	0.731462	NA	0.33148	0.358277	0.416211	0.720677
aPFF0195c_2	aPFF0195c_2::PFF0195c::hypothetical protein	0.717038	0.666621	0.916939	0.65343	0.881725	0.736784	0.74885	0.747546	0.714347	0.979788	NA	0.680149	0.764559	3.00019	6.8207
aPFD0380c_2	aPFD0380c_2::PFD0380c::hypothetical protein	2.72616	2.50242	3.52365	4.23645	3.81438	2.94714	2.76738	3.31662	4.1277	3.95969	2.18135	2.68867	3.01492	2.90814	2.48259
aPF14_0740_1	aPF14_0740_1::PF14_0740::hypothetical protein	0.562271	0.513983	0.460383	0.505663	0.962759	0.744264	0.651681	0.678302	0.470305	0.804102	0.450227	0.686287	0.621717	0.659001	0.464463
aMAL7P1.152_1	aMAL7P1.152_1::MAL7P1.152::hypothetical protein	0.756794	0.930362	0.892709	NA	0.798762	0.928771	0.918573	0.99767	0.842025	0.756801	1.00513	0.976025	1.05259	0.743044	1.05996
aPF13_0157_1	aPF13_0157_1::PF13_0157::ribose-phosphate pyrophosphokinase, putative	0.509736	0.486986	0.455281	0.359251	0.43411	0.486202	0.555808	0.422526	0.3798	0.368265	0.489622	0.536507	0.454286	0.414877	0.319391
aPFE0260w_1	aPFE0260w_1::PFE0260w::hypothetical protein	1.23387	1.37997	1.16052	0.54091	0.428322	1.31399	1.51843	1.28454	0.791923	0.560844	0.967988	NA	1.15913	0.641659	1.03656
aPFA0185w_0	aPFA0185w_0::PFA0185w::hypothetical protein	1.01805	1.03523	0.747325	0.555822	0.947324	1.218	0.982056	0.963755	NA	0.80748	0.921839	1.03496	0.841835	0.74171	0.51594
aPF10_0261_0	aPF10_0261_0::PF10_0261::hypothetical protein	0.444421	0.352001	0.600665	0.745615	1.0573	0.405169	0.415884	0.651453	0.709499	1.79065	0.265634	0.297105	0.6264	1.17393	1.22843
aPFI0730w_1	aPFI0730w_1::PFI0730w::hypothetical protein	1.96937	1.55649	1.81475	1.86268	2.18213	1.73412	1.78921	2.10698	2.44527	3.03565	1.06028	2.1313	1.99043	4.43558	1.58643
aPFF0515c_0	aPFF0515c_0::PFF0515c::hypothetical protein, conserved	0.430223	0.465181	0.479512	0.237241	0.196796	0.401429	0.496211	NA	NA	0.224675	NA	0.453023	0.324323	0.325498	0.568586
aPFL1250c_1	aPFL1250c_1::PFL1250c::hypothetical protein	1.26937	1.30936	1.19368	0.661564	0.561449	1.02851	1.42385	1.19692	0.821014	0.652066	1.69173	1.49534	1.09005	0.804408	0.802573
aMAL7P1.350_0	aMAL7P1.350_0::MAL7P1.350::	0.0908721	0.0643777	NA	NA	NA	NA	NA	NA	NA	NA	NA	0.116632	NA	NA	NA
aPFI0250c_2	aPFI0250c_2::PFI0250c::hypothetical protein	1.01663	0.958397	0.997283	0.875759	1.36407	1.15691	1.08441	1.06833	0.919601	1.24501	1.01301	1.06565	1.00341	1.09255	0.909036
aPFE0930w_1	aPFE0930w_1::PFE0930w::hypothetical protein, conserved	1.53631	1.61048	1.74843	1.25806	1.34671	2.12932	1.92784	NA	1.67758	1.73659	1.74463	2.05763	2.21757	1.61282	1.68587
aPFE0985w_1	aPFE0985w_1::PFE0985w::hypothetical protein	0.684381	0.624048	0.526698	0.391787	0.397452	0.69315	0.680184	0.593515	0.429901	0.549019	0.65508	0.696109	0.729434	NA	0.418835
aPF13_0278_1	aPF13_0278_1::PF13_0278::hypothetical protein	0.69006	0.694656	0.589188	0.479905	0.43218	0.868931	0.732008	0.654279	0.572124	0.469622	0.676466	0.7489	0.633425	0.744378	0.451593
aPF14_0018_1	aPF14_0018_1::PF14_0018::hypothetical protein	1.58742	1.49626	2.57355	3.71045	3.72563	1.68924	1.54823	2.5507	4.87922	6.03921	1.20998	1.56287	2.44237	3.50178	2.76338
aPFE0320w_1	aPFE0320w_1::PFE0320w::hypothetical protein	0.939959	1.05393	0.70779	1.08453	2.27088	0.59217	1.07534	0.984952	0.736974	1.55415	NA	1.10371	0.901548	1.6475	1.31149
aMAL13P1.86_0	aMAL13P1.86_0::MAL13P1.86::cholinephosphate cytidylyltransferase	2.29026	2.35705	2.85412	2.91468	2.61816	2.59682	2.56527	2.52385	3.62507	3.4698	1.739	2.42349	2.55009	3.38038	2.77157
aPFB0390w_0	aPFB0390w_0::PFB0390w::ribosome releasing factor, putative	1.75923	1.69147	1.63876	1.09402	0.852785	1.94481	2.15586	1.96566	1.32688	1.05749	1.98437	2.08833	1.59	1.09789	1.5525
aPFI0755c_1	aPFI0755c_1::PFI0755c::6-phosphofructokinase, putative	0.709939	0.695695	0.645301	0.42839	0.412887	0.804104	NA	NA	0.365254	0.402051	NA	0.65805	0.518683	0.486914	0.528809
aPF14_0463_2	aPF14_0463_2::PF14_0463::chloroquine resistance marker protein	2.03042	2.38405	2.7878	2.17449	1.51842	2.72523	2.60543	2.77115	2.33052	2.17074	2.02039	2.43086	2.95052	2.03837	2.31646
aMAL7P1.162_6	aMAL7P1.162_6::MAL7P1.162::dynein heavy chain, putative	0.734076	0.852485	0.904186	0.677832	1.86378	0.282995	0.84602	0.984952	1.05213	2.39203	1.0828	1.18351	1.20011	0.751048	2.6768
aPFF0565c_1	aPFF0565c_1::PFF0565c::hypothetical protein, conserved	0.92292	1.12246	0.974328	1.13062	1.85606	0.820311	1.16344	1.46118	1.24768	1.93255	0.841924	1.71019	1.33359	1.20595	1.074
aPF10_0149_1	aPF10_0149_1::PF10_0149::cysteine -- tRNA ligase, putative	0.518255	0.414302	0.388966	0.311803	0.368511	0.55851	0.462525	0.367414	0.292527	0.297315	0.511007	0.504587	0.355936	0.368187	0.259725
aPF10_0045_3	aPF10_0045_3::PF10_0045::hypothetical protein	2.36694	2.7807	2.61819	1.94131	1.29461	2.90225	2.79588	2.87713	2.66345	1.85991	2.3727	2.93667	3.04067	2.49727	2.45218
aPF08_0117_1	aPF08_0117_1::PF08_0117::hypothetical protein	0.621906	0.770456	0.651677	0.576157	0.46305	0.71933	0.629656	0.664171	0.405659	0.484826	0.574039	0.644545	0.5702	0.50559	0.540508
aPF10_0281_0	aPF10_0281_0::PF10_0281::hypothetical protein	0.369168	0.378998	0.746049	2.23549	3.40535	0.361535	0.380903	0.60058	1.60486	1.9714	0.315159	0.376905	0.518683	1.10323	1.42498
arps2_0	arps2_0::rps2::	1.27505	1.22733	1.00238	0.580224	0.455333	0.72681	0.469003	0.416873	NA	NA	1.26064	0.421103	0.244706	0.290814	0.146241
aPFF1315w_1	aPFF1315w_1::PFF1315w::hypothetical protein with ankyrin repeats	1.21967	1.26575	1.29698	1.44514	2.37506	1.37383	1.13234	1.35095	1.64688	2.66401	1.1841	1.2142	1.7024	2.01035	1.46358
aPFL0920c_0	aPFL0920c_0::PFL0920c::hypothetical protein	0.761054	0.827565	0.594289	0.668342	0.764033	0.881398	0.709983	0.641561	0.800004	1.58793	0.793525	0.806602	0.828955	1.42606	1.64024
aPF11_0331_1	aPF11_0331_1::PF11_0331::t-complex protein 1, alpha subunit, putative	0.34361	0.395611	0.392792	0.324004	0.345358	0.450049	0.423658	0.332086	0.300608	0.277043	0.375939	0.400232	0.340715	NA	0.376718
aPF11_0507_7	aPF11_0507_7::PF11_0507::antigen 332, putative	0.376267	0.386266	0.409371	0.386364	0.380087	0.344082	0.408111	0.373066	0.341012	0.349683	0.365809	0.392866	0.45897	0.392199	0.369698
aPF14_0675_0	aPF14_0675_0::PF14_0675::reticulocyte binding protein 2 homolog B, putative	2.67505	2.41105	2.06853	1.00997	0.914525	2.78507	2.81532	2.35286	1.40768	1.12845	2.68673	2.712	1.96233	1.37937	0.838841
aPF08_0035_1	aPF08_0035_1::PF08_0035::hypothetical protein	1.31765	1.89291	3.82207	8.26142	12.7377	1.44115	1.80605	3.44662	7.4263	10.2895	1.25838	1.75807	3.58512	5.10792	7.0617
aMAL7P1.310_0	aMAL7P1.310_0::MAL7P1.310::	1.1501	1.67694	1.54566	1.81388	3.56549	1.32147	1.5573	1.69858	1.89254	2.14709	1.54765	1.35784	2.37212	1.73688	1.10207
aPFA0005w_0	aPFA0005w_0::PFA0005w::erythrocyte membrane protein 1 (PfEMP1)	NA	NA	0.173441	NA	NA	NA	NA	0.264255	NA	NA	NA	NA	NA	NA	0.0935945
aPFI1445w_1	aPFI1445w_1::PFI1445w::hypothetical protein	3.63772	3.27496	4.09881	4.59299	3.62337	3.77991	3.8466	3.6699	4.69982	5.00705	3.81342	4.3694	4.63536	5.05723	3.34132
aPF13_0198_1	aPF13_0198_1::PF13_0198::reticulocyte binding protein 2 homolog a	0.624746	0.82445	1.49975	4.43031	8.02428	0.590923	0.782536	1.37498	3.24204	4.95131	0.599927	0.798008	1.44248	2.28383	2.74349
aPF14_0020_1	aPF14_0020_1::PF14_0020::choline kinase, putative	1.66126	2.00609	2.27513	2.34123	2.02392	2.11685	2.05999	2.0236	2.82022	2.97484	2.07329	2.13989	2.53838	2.52662	2.9611
aPFE0715w_0	aPFE0715w_0::PFE0715w::asparagine -- tRNA ligase, putative	2.74746	2.897	1.99202	1.59968	1.39301	1.85131	2.80495	1.77206	2.0089	1.52543	2.25226	1.59111	1.57244	3.0949	2.8207
aPF13_0309_0	aPF13_0309_0::PF13_0309::hypothetical protein	0.256998	0.294891	0.292043	0.321292	0.347288	0.259308	0.283734	0.250124	0.242426	0.256772	0.283643	0.294649	0.288027	0.32283	0.405966
aMAL7P1.37_1	aMAL7P1.37_1::MAL7P1.37::sin3 associated polypeptide p18-like protein, putative	0.636105	0.621972	0.68356	0.570735	0.524791	0.799117	0.764397	0.772982	0.597983	0.579426	0.732744	0.766088	0.854714	0.625651	0.781514
aPFL1010c_3	aPFL1010c_3::PFL1010c::hypothetical protein	1.93671	1.87526	1.84281	1.82201	1.43739	1.60073	1.98743	2.29775	2.59395	2.42075	1.84255	2.00239	2.52199	3.37771	3.58116
aPFL0360c_0	aPFL0360c_0::PFL0360c::hypothetical protein	1.03793	1.18683	1.18475	0.973367	1.01871	1.43866	1.22951	1.15453	1.18788	1.55752	0.827292	1.99379	1.20948	1.32867	1.18397
aPF14_0062_0	aPF14_0062_0::PF14_0062::hypothetical protein	NA	NA	0.242307	NA	NA	NA	0.299281	0.569491	NA	NA	NA	0.381816	0.327835	0.344175	1.28341
aPFE0735w_0	aPFE0735w_0::PFE0735w::hypothetical protein	1.06633	0.238821	0.804713	0.868981	0.976265	0.876411	0.592084	0.85777	0.87758	0.915595	1.04565	0.991986	0.882814	0.881781	0.699619
aPFE0705c_2	aPFE0705c_2::PFE0705c::helicase, belonging to UvrD family, putative	2.09148	2.04763	1.41431	1.24857	1.34478	2.0969	2.03537	2.45178	1.88445	1.99674	1.70974	2.24793	2.09698	2.08239	1.26821
aPFI0465c_0	aPFI0465c_0::PFI0465c::hypothetical protein	2.27322	2.50762	2.7827	1.49801	1.32162	3.14037	2.83086	2.39667	1.94425	1.5457	1.97199	2.60396	2.55477	1.49142	1.21907
aPF11_0123_0	aPF11_0123_0::PF11_0123::hypothetical protein	0.614807	0.620933	0.585362	0.742904	0.846997	0.593416	0.663342	0.570905	0.55273	0.543951	0.792399	0.563517	0.497607	0.506924	0.623573
aPF14_0244_1	aPF14_0244_1::PF14_0244::ABC transporter, putative	0.678701	0.83691	0.5369	0.535487	0.613542	0.846491	0.835655	0.65004	0.494548	0.533815	0.840799	0.796781	0.734117	0.843094	0.67856
aPF14_0222_0	aPF14_0222_0::PF14_0222::hypothetical protein	2.19087	2.52942	2.19734	2.24769	3.42464	2.23528	2.64559	2.29775	3.26143	4.49351	1.5848	2.88265	NA	2.98418	3.32377
aPF10_0097_0	aPF10_0097_0::PF10_0097::hypothetical protein	1.11744	1.31974	1.17327	1.00319	0.596177	0.698137	0.909504	0.854944	0.568892	0.587873	1.00851	0.974798	0.791489	0.713695	0.790873
aMAL13P1.262_0	aMAL13P1.262_0::MAL13P1.262::hypothetical protein	1.39148	1.31144	1.33779	0.852713	0.710011	1.21426	1.7335	1.45552	1.16687	0.750044	1.51726	1.5334	1.44833	0.963155	0.84001
aPFD0420c_0	aPFD0420c_0::PFD0420c::flap exonuclease, putative	2.47201	2.44428	2.25218	1.36109	1.02643	2.94714	2.57304	2.13665	1.6889	1.32271	2.44586	2.43454	2.31709	1.97967	2.38783
aPF10_0187_0	aPF10_0187_0::PF10_0187::ribosomal protein L30e, putative	0.724137	0.555517	NA	0.322648	0.258537	0.664477	0.594675	0.493182	0.410507	0.339547	0.664084	0.558606	0.379352	0.422881	0.224627
aPF14_0048_0	aPF14_0048_0::PF14_0048::hypothetical protein	1.586	1.88357	1.90019	2.38868	2.91143	1.36261	NA	2.19035	2.67153	3.6911	1.35631	1.75071	2.07356	2.35053	2.02398
aPFE1390w_1	aPFE1390w_1::PFE1390w::RNA helicase-1	0.492697	0.471411	0.474411	0.372808	0.488132	0.474982	0.424953	0.381545	0.30384	0.353061	0.487371	0.482488	0.419161	0.404205	0.457443
aMAL13P1.176_2	aMAL13P1.176_2::MAL13P1.176::Plasmodium falciparum reticulocyte binding protein 2 homolog b	0.623326	0.914786	1.68212	4.05208	8.47189	0.771691	0.707392	1.51629	3.18224	4.7317	0.590923	0.890086	1.47409	2.22646	2.41006
aPF14_0587_1	aPF14_0587_1::PF14_0587::hypothetical protein	0.657403	0.704001	0.70524	0.530065	0.609683	0.811584	0.750146	0.630256	0.568892	0.484826	0.626941	0.757494	0.768072	0.676343	0.446914
aPF14_0700_0	aPF14_0700_0::PF14_0700::hypothetical protein, conserved	1.37018	1.39139	1.05212	0.751038	0.721587	NA	1.25802	1.20399	0.838792	0.793966	1.44635	1.4978	1.0561	0.980497	0.766305
aPF10_0232_2	aPF10_0232_2::PF10_0232::hypothetical protein	1.07343	1.06223	1.80837	2.07688	2.69534	1.32397	1.33187	1.52335	2.01698	2.16398	1.08392	1.29891	1.59351	1.93698	1.88944
aPFE1325w_3	aPFE1325w_3::PFE1325w::hypothetical protein	0.849086	NA	1.41303	1.23637	1.10939	1.14819	0.991126	1.10648	1.17496	NA	1.0828	1.20806	1.66025	2.29983	3.28868
aPF08_0030_0	aPF08_0030_0::PF08_0030::hypothetical protein	0.22576	0.227399	0.340505	NA	0.449545	0.276761	0.309646	NA	0.195557	0.273665	NA	0.279917	0.295052	0.3295	0.772154
aPFE1535w_1	aPFE1535w_1::PFE1535w::hypothetical protein	0.397566	0.401841	0.414472	0.370096	0.37044	0.451296	0.392563	0.406981	0.268284	0.302383	0.407455	0.397776	0.31964	0.31616	0.386077
aPF11_0393_0	aPF11_0393_0::PF11_0393::hypothetical protein, conserved	0.69858	0.735152	0.552204	0.504307	0.781398	NA	0.654272	0.618951	0.426669	0.520301	0.590923	0.61508	0.532733	0.536272	0.740566
aPFI0655c_0	aPFI0655c_0::PFI0655c::hypothetical protein	0.815009	0.70504	0.582811	0.464993	0.609683	0.579703	0.768284	0.696673	0.57374	0.614901	0.688847	0.753811	0.506974	0.731037	1.22375
aPF11_0515_0	aPF11_0515_0::PF11_0515::rifin	0.626166	0.49114	0.335403	0.435168	NA	0.403922	0.32908	0.497422	0.245658	0.327722	0.388321	0.346213	0.353594	0.426883	NA
aPFE1200w_0	aPFE1200w_0::PFE1200w::hypothetical protein	1.06207	1.17437	1.0738	1.06555	1.16727	1.09458	1.17769	1.03865	1.05374	1.01526	0.980369	1.14913	0.975311	0.864438	0.822462
aPFB0195c_0	aPFB0195c_0::PFB0195c::hypothetical protein	0.707099	0.726845	NA	0.49075	0.449545	0.827791	0.776058	0.620364	0.501013	0.391915	0.712484	0.759949	0.636938	0.457565	0.457443
aMAL7P1.52_1	aMAL7P1.52_1::MAL7P1.52::RIF pseudogene	NA	NA	0.227003	NA	NA	NA	NA	NA	NA	NA	NA	NA	0.234168	NA	NA
aPFF1440w_2	aPFF1440w_2::PFF1440w::SET-domain protein, putative	1.47383	1.77973	1.94483	1.56308	1.57823	1.64935	1.94209	1.91338	1.52566	1.5305	1.35856	1.7458	1.96467	1.3807	1.24247
aPFI0390c_0	aPFI0390c_0::PFI0390c::hypothetical protein	2.92637	2.92399	1.86449	1.66882	1.82133	2.56191	2.7609	2.12817	1.65981	1.80416	2.7205	2.16444	1.80192	1.57146	1.71161
aPF08_0131_0	aPF08_0131_0::PF08_0131::1-cys peroxidoxin	0.846247	0.938668	0.744774	0.359251	0.374299	1.07713	0.971692	0.637322	0.47677	0.368265	0.879068	0.854483	0.498778	0.304154	0.347469
aPF10_0128_1	aPF10_0128_1::PF10_0128::hypothetical protein	0.765314	0.673889	0.800887	0.61276	0.576884	0.71185	0.590789	0.572318	0.4897	0.503408	0.533519	0.602803	0.502291	0.486914	0.444574
aPF10_0214_0	aPF10_0214_0::PF10_0214::hypothetical protein	0.424543	0.502561	0.580261	0.471771	0.43411	0.585936	0.544147	0.446549	0.447679	0.407119	0.454729	0.50827	0.530391	0.586964	0.583796
aPF13_0136_1	aPF13_0136_1::PF13_0136::hypothetical protein	0.526774	0.603281	0.61852	0.483972	0.486203	0.578456	0.576537	0.55536	0.588286	0.461176	0.499752	0.511953	0.478874	0.497586	0.563907
aPF11_0327_1	aPF11_0327_1::PF11_0327::hypothetical protein	0.746855	0.8556	1.35182	2.17042	3.60022	0.956198	0.992421	1.09659	1.62425	2.0035	0.857682	0.995669	1.1123	1.27265	2.46621
aPF14_0292_0	aPF14_0292_0::PF14_0292::hypothetical protein, conserved	0.34077	0.280355	NA	NA	0.472697	0.354055	0.28503	0.278387	NA	0.354751	0.290396	0.308154	0.266952	0.374857	NA
aPF10_0183_0	aPF10_0183_0::PF10_0183::hypothetical protein	1.17708	1.36439	1.04319	1.30822	1.3988	1.18808	1.13753	1.03017	1.3398	1.5136	1.15483	1.36152	1.55019	1.48609	1.42147
aPF14_0175_5	aPF14_0175_5::PF14_0175::hypothetical protein	0.992494	1.12349	1.41686	1.25263	1.34671	1.17811	1.32021	NA	1.22182	1.20953	1.25838	1.37503	1.57244	1.06587	1.11962
aMAL8P1.138_0	aMAL8P1.138_0::MAL8P1.138::hypothetical protein, conserved	2.29168	2.19923	1.60943	1.17265	1.43353	1.99592	2.31651	2.03208	1.40445	1.3717	2.14646	2.34001	1.92252	1.48876	1.31617
aPFE1485w_2	aPFE1485w_2::PFE1485w::hypothetical protein	1.4071	1.75481	1.55204	1.33804	1.22515	1.7603	1.79828	1.99675	1.59193	1.44772	1.60168	1.73966	1.823	1.66218	1.5525
aPF10_0295_0	aPF10_0295_0::PF10_0295::hypothetical protein	0.477079	0.554479	0.925866	1.30957	1.83484	0.508643	0.523418	0.662758	1.1394	1.4511	0.44685	0.514408	0.677917	0.943145	0.918396
aPF07_0086_0	aPF07_0086_0::PF07_0086::hypothetical protein	1.329	1.6759	1.6158	1.21061	1.17692	1.11702	1.44847	1.62934	1.26061	1.10648	1.45648	1.55919	1.51975	1.30333	1.86253
aPF10_0065_0	aPF10_0065_0::PF10_0065::hypothetical protein	0.903042	0.95632	0.553479	0.424323	0.493921	1.02601	0.983352	0.782874	NA	NA	1.03665	1.02513	0.618204	0.452229	0.325241
aPF10_0203_0	aPF10_0203_0::PF10_0203::ADP-ribosylation factor	2.40953	2.28437	2.36823	1.51292	1.0573	2.52077	2.52769	2.07589	1.99759	1.37001	2.06204	2.31791	1.96818	1.61148	1.50687
aPF11_0460_0	aPF11_0460_0::PF11_0460::hypothetical protein	0.769573	0.665582	0.701414	0.587003	0.68107	0.834024	0.743668	0.829507	0.583437	0.611523	0.808157	0.726801	0.683771	0.751048	0.772154
aPFL0950c_2	aPFL0950c_2::PFL0950c::p-type Atpase2	1.19128	1.16295	1.43343	1.15638	1.2676	1.40749	1.30854	1.38204	1.44486	1.69436	1.30228	1.33329	1.37691	1.55946	1.04007
aPFE0745w_0	aPFE0745w_0::PFE0745w::hypothetical protein	1.38296	1.26575	1.03554	0.656141	0.646341	1.52717	1.33575	1.16583	0.791923	0.604765	1.25501	1.17369	1.13103	0.911129	NA
aPF10_0345_0	aPF10_0345_0::PF10_0345::merozoite surface protein-3	1.81602	1.13803	0.559856	3.60742	1.25602	0.68567	0.551921	0.320781	0.0727277	0.478069	0.787897	0.0699792	0.190847	0.336171	0.155601
aMAL8P1.144_1	aMAL8P1.144_1::MAL8P1.144::hypothetical protein	0.910141	1.01031	1.55204	3.81077	6.73738	0.746757	0.939302	1.44281	3.02547	4.20126	0.706856	0.988303	1.46238	2.84678	2.8558
aMAL13P1.103_1	aMAL13P1.103_1::MAL13P1.103::hypothetical protein	1.85578	1.92925	2.0392	1.3394	1.202	2.43351	2.26599	2.11687	1.85213	1.79909	2.20048	2.41244	2.34519	1.977	2.7002
aPFC0450w_0	aPFC0450w_0::PFC0450w::hypothetical protein	1.1856	0.94386	0.939895	1.24857	1.69399	1.06591	0.971692	0.996257	1.1992	1.40549	1.10193	1.01163	0.853543	0.988501	0.698449
aPFI0550w_3	aPFI0550w_3::PFI0550w::hypothetical protein	0.68864	NA	0.510119	0.60327	1.91394	0.332862	0.743668	0.97506	0.32485	1.07439	1.13457	NA	NA	1.05253	2.50599
aPF14_0551_1	aPF14_0551_1::PF14_0551::hypothetical protein	1.73367	NA	1.00238	0.997769	0.6502	1.43492	1.95375	1.40889	0.804853	NA	1.20548	1.83665	1.33125	1.38337	1.33021
aPFF0325c_2	aPFF0325c_2::PFF0325c::hypothetical protein, expressed	0.478499	0.559671	0.62107	0.688677	0.846997	0.509889	0.589493	0.599167	0.630306	0.772005	0.423213	0.606486	0.656842	0.756384	0.996781
aPF14_0741_1	aPF14_0741_1::PF14_0741::hypothetical protein	0.390466	0.423647	0.284391	0.371452	0.544084	0.164561	0.270778	0.580796	0.239193	0.263529	0.404079	0.247996	0.314956	0.324164	0.416495
aMAL13P1.32_0	aMAL13P1.32_0::MAL13P1.32::hypothetical protein	0.482758	0.478679	0.202772	NA	0.708081	0.471242	0.655568	0.956689	NA	0.447662	NA	0.441974	1.77499	NA	0.328751
aPFC0355c_0	aPFC0355c_0::PFC0355c::hypothetical protein	1.63428	1.93548	2.79163	6.25097	8.45067	0.981132	1.78791	2.53798	5.53538	6.11692	1.45086	1.56655	2.385	4.84913	8.01637
aPFF1450w_0	aPFF1450w_0::PFF1450w::sec14-like cytosolic factor or phosphatidylinositol/phosphatidylcholine transfer protein, putative	0.971196	0.902326	0.892709	0.833733	0.547943	1.09333	0.980761	0.839399	0.98748	0.793966	0.991625	0.977253	0.922623	1.12724	0.947644
aPF14_0733_0	aPF14_0733_0::PF14_0733::hypothetical protein	0.873224	1.21279	1.56734	7.07114	17.7213	0.996092	1.41997	1.88935	3.71881	11.3824	0.909458	1.28786	1.88388	2.87079	3.49341
aPFA0540c_0	aPFA0540c_0::PFA0540c::hypothetical protein	1.19128	1.12453	0.915664	0.717146	0.708081	0.921291	1.42774	1.37639	1.04889	0.841266	1.16496	1.46097	1.00224	0.8551	0.934775
aPFE0840c_3	aPFE0840c_3::PFE0840c::hypothetical protein	2.38539	2.62703	3.37954	2.01316	1.83484	2.59059	2.79847	3.06932	2.35961	2.06769	2.95124	2.83723	3.89305	2.76007	3.53553
aPFF0100w_1	aPFF0100w_1::PFF0100w::putative ATP dependent RNA helicase	0.339351	0.523328	0.733296	0.894738	0.827703	0.619596	0.615405	0.655692	0.796772	0.910527	0.32754	0.788187	0.810222	1.10589	3.80345
aPF13_0340_0	aPF13_0340_0::PF13_0340::exosome complex exonuclease, putative	0.518255	0.520213	0.422124	0.380942	0.412887	0.460022	0.480664	0.423939	0.350709	0.341236	0.570663	0.511953	0.467166	0.449561	0.409476
aPFE0675c_0	aPFE0675c_0::PFE0675c::deoxyribodipyrimidine photolyase (photoreactivating enzyme, DNA photolyase), putative	1.39716	1.51391	1.76756	1.24179	1.27339	1.73786	1.69074	1.65195	1.3996	1.31933	1.61406	1.75194	1.74924	1.61148	1.72916
aPF10_0375_1	aPF10_0375_1::PF10_0375::hypothetical protein	NA	0.871176	0.79196	0.718502	0.740881	0.375249	0.926346	0.941145	0.803237	0.944313	NA	0.946561	0.789147	0.669673	NA
aPFL0555c_0	aPFL0555c_0::PFL0555c::hypothetical protein	0.822109	0.796414	0.695037	0.592425	0.609683	1.01355	0.855089	0.794179	0.625458	0.586183	1.10531	0.896225	0.776268	0.675009	0.727697
aPFC0210c_0	aPFC0210c_0::PFC0210c::circumsporozoite (CS) protein	1.00953	1.0965	0.739673	NA	0.951183	1.15567	1.16992	1.05843	0.703034	0.930798	0.778892	0.964976	1.13923	1.24063	1.40275
aMAL7P1.167_2	aMAL7P1.167_2::MAL7P1.167::hypothetical protein	2.357	2.6426	3.16019	3.52608	4.30058	3.08178	2.91767	3.53706	3.85295	4.25363	2.14533	2.72428	3.94105	3.33769	2.52471
aPF10_0224_1	aPF10_0224_1::PF10_0224::dynein heavy chain, putative	0.549492	0.569016	0.413197	0.467704	NA	0.311668	0.483255	0.888859	NA	0.844645	NA	NA	0.5702	0.326832	0.829481
aPFF0335c_0	aPFF0335c_0::PFF0335c::hypothetical protein	2.32576	1.9739	1.77649	1.28653	0.887513	2.68658	2.46032	2.08578	1.65657	1.21629	2.20611	2.42595	2.1122	1.55679	0.871599
aPF14_0093_1	aPF14_0093_1::PF14_0093::hypothetical protein	0.722717	NA	0.590463	0.710368	0.887513	1.01853	0.868045	1.06691	0.850105	2.13864	NA	1.11721	1.08888	1.50476	2.83591
arpl36_0	arpl36_0::rpl36::	1.73935	1.61048	2.52509	1.98605	1.66505	1.23047	0.677593	0.466333	0.32485	0.277043	1.13795	0.666644	0.402769	0.334836	0.318221
aPF14_0187_0	aPF14_0187_0::PF14_0187::glutathione s-transferase, putative	0.46004	0.422608	0.414472	0.310447	0.31063	0.531083	0.444387	0.361761	0.321618	0.268597	0.423213	0.419875	0.316127	0.30949	0.311202
aPF10_0284_2	aPF10_0284_2::PF10_0284::hypothetical protein	NA	0.316697	0.337954	0.226396	0.165926	0.276761	0.255231	0.332086	0.184243	0.246636	0.240871	0.260273	0.234168	0.201436	0.287803
aPFC0175w_0	aPFC0175w_0::PFC0175w::IBR domain protein, putative	1.21399	1.38412	1.25234	1.11842	0.910666	1.48977	1.31502	1.07822	1.22667	1.10479	1.14695	1.36398	1.45418	1.23529	1.63205
aPFC0245c_2	aPFC0245c_2::PFC0245c::hypothetical protein	0.844827	1.03108	2.02517	2.21651	2.68569	1.04222	1.0572	1.46683	1.92809	2.30926	0.888072	1.08775	1.49048	1.39404	2.70254
aPF14_0084_7	aPF14_0084_7::PF14_0084::hypothetical protein	1.63286	1.89291	1.77266	1.30957	1.02257	1.99592	1.8786	1.89218	1.62263	1.34467	1.59155	2.16076	2.10283	1.30866	0.724187
aMAL8P1.200_0	aMAL8P1.200_0::MAL8P1.200::	1.31197	0.939707	1.0789	1.12791	1.00906	0.890125	0.980761	0.911469	0.774145	0.704434	1.24037	0.741534	0.909743	0.777728	1.26119
aPFI0335w_1	aPFI0335w_1::PFI0335w::hypothetical protein	0.434482	0.380036	0.25761	0.288756	0.314488	0.337848	0.349809	0.368827	0.2699	0.322654	0.401827	0.376905	0.339544	0.341507	0.228137
aPFL1365w_0	aPFL1365w_0::PFL1365w::hypothetical protein	0.401825	0.5036	0.433601	0.831022	1.36793	0.417635	NA	0.802658	0.675559	0.699366	0.523389	0.647001	0.714213	0.717697	0.565077
aPFD0415c_0	aPFD0415c_0::PFD0415c::hypothetical protein	0.617646	0.573169	0.646576	0.417545	0.480415	0.775431	0.576537	0.589275	0.287678	0.454419	0.539147	0.617536	0.554979	0.381527	0.414156
aPFE1050w_0	aPFE1050w_0::PFE1050w::adenosylhomocysteinase(S-adenosyl-L-homocysteine hydrolase)	1.52921	1.27302	1.2753	0.844579	0.6502	1.5546	1.36426	1.2803	1.06344	0.775384	1.39233	1.53954	1.44248	0.827086	0.627083
aPF10_0348_1	aPF10_0348_1::PF10_0348::hypothetical protein	2.29736	2.06009	2.5557	3.27935	3.52497	1.28407	1.47438	1.7	3.08365	2.64543	1.57467	1.06074	2.03961	2.2358	2.28488
aPFB0175c_1	aPFB0175c_1::PFB0175c::hypothetical protein	0.373428	0.335387	0.34433	0.321292	0.497779	0.387715	0.334262	0.346217	0.30384	0.442594	NA	0.353579	0.313785	0.348177	0.455103
aPFD0320c_3	aPFD0320c_3::PFD0320c::hypothetical protein	0.717038	0.794338	0.994732	0.904228	0.810338	1.14195	0.953554	1.02452	NA	1.11155	0.836296	0.887631	1.01161	1.14725	NA
aPFI1315c_0	aPFI1315c_0::PFI1315c::hypothetical protein	1.11176	NA	0.960299	0.763239	0.839279	0.75299	1.27486	1.15594	0.972934	0.92573	1.13345	1.26822	1.25865	1.04987	0.999121
aPF14_0362_0	aPF14_0362_0::PF14_0362::hypothetical protein	NA	1.99259	2.30064	3.00008	2.45996	1.53964	2.19214	2.54222	3.81739	4.69453	1.87632	2.08342	2.57585	4.46627	4.60953
aPF10_0082_0	aPF10_0082_0::PF10_0082::hypothetical protein	2.08864	2.47439	1.96013	2.31954	1.57051	2.02709	2.63134	2.66092	3.18547	3.03903	2.51001	2.64325	3.2444	3.6165	4.53348
aPFE1640w_1	aPFE1640w_1::PFE1640w::erythrocyte membrane protein 1 (PfEMP1), truncated, pseudogene	NA	NA	0.153036	NA	NA	NA	0.124377	0.315128	NA	NA	NA	NA	NA	NA	NA
aMAL13P1.245_0	aMAL13P1.245_0::MAL13P1.245::hypothetical protein	0.878904	0.894019	0.64275	0.616827	0.924172	0.497423	0.580424	NA	0.588286	0.853091	0.607806	0.629813	0.677917	0.648329	0.499561
aPFB0400w_1	aPFB0400w_1::PFB0400w::hypothetical protein	0.364908	0.417417	0.372387	0.524642	0.943465	0.322888	0.310941	0.587862	0.347477	0.643619	0.24875	0.309382	0.606496	0.73504	2.18192
aPFL0475w_1	aPFL0475w_1::PFL0475w::3',5'-cyclic-nucleotide phosphodiesterase, putative	2.80852	2.8077	3.34766	3.47457	4.96043	3.13912	2.8205	3.45793	4.34103	5.31112	2.03953	2.99806	3.26782	3.09891	3.73442
aPFE1055c_1	aPFE1055c_1::PFE1055c::hypothetical protein	0.583569	0.600166	0.55603	0.444658	NA	0.69689	0.620587	0.481877	0.444447	0.378401	0.567286	0.578249	0.542099	0.366853	0.299502
aPFL0035c_1	aPFL0035c_1::PFL0035c::octapeptide-repeat antigen, putative	0.0354969	0.0290738	0.0561131	0.123365	0.273972	0.0311668	0.0259118	0.0423939	0.0581821	0.11994	0.0292647	0.0245541	0.0316127	0.0947147	0.152091
aMAL13P1.352_0	aMAL13P1.352_0::MAL13P1.352::hypothetical protein	0.617646	0.561747	0.612143	0.553111	0.447615	0.66323	0.627065	0.60482	0.425053	0.410497	0.527891	0.543873	0.510487	0.433553	0.51477
aPF10_0290_0	aPF10_0290_0::PF10_0290::hypothetical protein	0.569371	0.530597	0.408095	0.325359	NA	0.364029	NA	0.631669	0.200405	0.591251	NA	0.437063	0.426186	1.56613	4.40479
aPFL1600c_0	aPFL1600c_0::PFL1600c::hypothetical protein	1.83732	2.56992	NA	3.05973	4.54368	1.05095	2.39943	3.20215	2.97214	4.78238	2.67547	3.00051	3.64483	3.98736	3.17168
aPFE1485w_0	aPFE1485w_0::PFE1485w::hypothetical protein	1.04219	1.32182	1.21281	1.10758	1.038	1.38131	1.38369	1.51488	1.05859	1.26866	1.27527	1.29155	1.47292	1.36069	1.13951
aPF14_0547_4	aPF14_0547_4::PF14_0547::hypothetical protein	1.45963	1.65824	1.58647	1.00048	0.729304	1.83635	1.88379	1.72543	1.21859	0.87843	1.73	1.98029	1.78787	1.0472	1.06581
aPF10_0224_5	aPF10_0224_5::PF10_0224::dynein heavy chain, putative	0.401825	0.347847	0.331577	0.336205	0.405169	0.400182	0.366652	0.791353	NA	0.456108	0.391697	0.353579	0.36179	0.31616	0.67388
aPF14_0079_1	aPF14_0079_1::PF14_0079::hypothetical protein	0.421703	0.52852	0.511394	0.546333	0.522861	0.441322	0.478072	0.449375	0.399194	0.388536	0.422088	0.461617	0.422674	0.392199	0.540508
aPF13_0104_1	aPF13_0104_1::PF13_0104::hypothetical protein	NA	0.808875	0.460383	0.521931	0.779468	0.295462	0.755328	1.04572	0.547882	0.956138	0.895951	1.01163	0.965944	1.19927	0.796723
aPF14_0755_0	aPF14_0755_0::PF14_0755::hypothetical protein	0.237119	NA	NA	NA	NA	0.275515	NA	NA	NA	0.195958	NA	0.223442	NA	NA	0.250365
aPFL1230w_1	aPFL1230w_1::PFL1230w::hypothetical protein	0.308113	0.32708	0.405545	0.353828	0.501638	0.314162	0.32001	0.340564	0.289294	0.364886	0.330917	0.352351	0.362961	0.366853	0.390757
aPFL0335c_0	aPFL0335c_0::PFL0335c::eukaryotic translation initiation factor 5, putative	0.839147	1.01966	0.998558	0.999124	1.04958	1.05843	0.965214	0.942558	0.924449	0.92742	0.891449	0.952699	0.956577	0.885783	0.898507
aPFC0875w_0	aPFC0875w_0::PFC0875w::hypothetical protein	0.398985	0.439222	0.563682	0.925919	0.858573	0.518616	0.377016	0.453615	0.518791	0.613212	0.409706	0.311837	0.399257	0.374857	0.518279
aPFA0210c_1	aPFA0210c_1::PFA0210c::hypothetical protein	1.47951	1.45161	2.15525	4.35575	6.15085	1.63065	1.50418	1.83142	2.88971	3.89719	1.52514	1.59356	1.87335	2.49193	1.53378
aPF11_0464_0	aPF11_0464_0::PF11_0464::hypothetical protein	2.73042	2.9188	3.94322	4.2717	3.78351	3.00448	3.15476	3.77447	5.71639	6.28584	2.59331	3.61068	4.64941	5.02788	5.26235
aPFC0925w_0	aPFC0925w_0::PFC0925w::hypothetical protein	0.651724	0.693618	0.714167	0.997769	1.08624	0.725564	0.638725	0.681129	0.803237	1.18757	0.553779	0.58316	0.629912	1.22996	3.59169
aPF10_0142_0	aPF10_0142_0::PF10_0142::hypothetical protein	0.444421	0.445452	0.448905	0.422967	0.486203	0.431349	0.453456	0.575144	0.307072	0.373333	0.415334	0.457934	0.392232	0.452229	0.51126
aMAL7P1.16_0	aMAL7P1.16_0::MAL7P1.16::hypothetical protein	0.80791	0.832757	0.786859	0.666987	0.646341	0.988612	0.804561	0.664171	0.719196	0.491583	0.870063	0.790642	NA	0.745712	1.71629
aMAL7P1.202_1	aMAL7P1.202_1::MAL7P1.202::	1.09331	1.32701	1.2804	0.913718	0.879796	1.44489	1.41997	1.38345	1.06182	0.866605	1.04115	1.07056	1.24343	0.872443	0.857559
aPF13_0149_0	aPF13_0149_0::PF13_0149::chromatin assembly factor 1 subunit, putative	1.46247	1.4973	1.4092	1.1008	0.966618	1.12699	1.6169	1.4852	1.39314	1.27372	1.40021	1.72984	1.78787	1.56613	1.10558
aPF14_0059_2	aPF14_0059_2::PF14_0059::hypothetical protein	0.670182	0.771494	0.798337	0.661564	0.677211	0.815324	0.812334	0.809724	0.706266	0.655444	0.689973	0.750128	0.908573	0.660335	0.733547
aMAL13P1.138_0	aMAL13P1.138_0::MAL13P1.138::hypothetical protein	NA	0.794338	0.64275	0.627672	0.644412	0.60339	0.759215	0.798418	0.505861	0.420633	0.577416	0.813968	0.631083	0.49225	1.22258
ac1rRNA18s_1	ac1rRNA18s_1::c1rRNA18s::	1.13306	1.09131	2.06981	1.75287	1.35635	1.17561	0.974283	0.905816	1.17496	0.947691	1.20998	0.834839	0.963602	0.820416	1.35127
aMAL8P1.19_0	aMAL8P1.19_0::MAL8P1.19::hypothetical protein, conserved	0.34503	0.352001	0.350707	0.281978	0.335712	0.339095	0.356287	0.308062	0.229496	0.248325	0.269011	0.341302	0.329006	0.248126	0.232816
aPFL0280c_0	aPFL0280c_0::PFL0280c::hypothetical protein	1.25091	1.21798	1.15032	0.6941	0.61933	1.45985	1.24895	1.00897	0.736974	0.61828	1.11769	1.1123	0.734117	0.604307	0.533489
aMAL13P1.19_4	aMAL13P1.19_4::MAL13P1.19::hypothetical protein	1.19554	1.53676	1.51378	1.18621	1.01871	1.92237	1.81382	1.79609	1.47556	1.1994	1.72662	1.7814	1.74455	1.20194	0.974553
aPF10_0147_0	aPF10_0147_0::PF10_0147::FAD synthetase, putative	1.81602	2.0144	1.74588	1.4248	1.0708	1.61319	1.86306	1.47107	1.69213	1.47475	1.63207	1.79736	1.77851	1.70086	2.05089
aPF14_0208_0	aPF14_0208_0::PF14_0208::hypothetical protein, conserved	0.660243	NA	0.51267	NA	0.436039	0.68941	NA	0.493182	0.473538	0.358129	0.647201	0.595437	0.489412	0.457565	0.418835
aPF14_0731_0	aPF14_0731_0::PF14_0731::hypothetical protein	0.278296	0.23259	0.270363	0.288756	0.252748	0.386469	0.269483	0.231753	0.258587	0.278733	0.281392	0.270095	0.206068	0.244124	0.274934
aPF10_0337_0	aPF10_0337_0::PF10_0337::ADP-ribosylation factor-like protein	2.61683	2.35913	2.27003	2.27887	1.59559	3.09175	2.67539	2.35569	2.21577	1.92748	2.68673	2.65553	2.03843	1.95966	1.92337
aPF08_0050_1	aPF08_0050_1::PF08_0050::hypothetical protein	0.366328	NA	0.478237	NA	1.06887	NA	0.431431	0.541229	NA	0.988234	NA	0.40146	0.532733	0.796404	5.04708
aPFC0145c_0	aPFC0145c_0::PFC0145c::hypothetical protein	1.63996	2.06424	NA	2.93501	3.00404	1.72415	2.15845	2.04197	3.3778	3.73502	1.55891	2.15953	2.83578	3.14693	4.54518
aMAL8P1.22_0	aMAL8P1.22_0::MAL8P1.22::dehydrodolichyl diphosphate synthetase, putative	2.27322	2.25737	2.19479	1.62273	1.19621	1.86502	2.37222	2.2384	2.33052	1.62003	2.32317	2.33264	2.2246	1.7182	1.40509
aPF14_0406_1	aPF14_0406_1::PF14_0406::hypothetical protein	NA	1.32182	0.652953	0.460926	0.571096	0.58843	1.12198	0.967994	NA	0.653755	0.871189	1.35048	0.865252	0.784398	0.569756
aPFB0950w_0	aPFB0950w_0::PFB0950w::hypothetical protein	NA	0.2897	0.355808	NA	NA	NA	0.265596	0.377306	NA	NA	NA	NA	0.296223	0.288146	0.635273
aPF14_0220_1	aPF14_0220_1::PF14_0220::hypothetical protein	0.318052	0.399765	NA	NA	0.812268	0.254321	NA	0.541229	NA	0.723016	0.321912	0.341302	0.439065	0.546944	0.482012
aPF10_0242_0	aPF10_0242_0::PF10_0242::hypothetical protein	0.826368	0.831718	0.930968	0.818821	1.01485	0.967418	0.925051	0.883206	0.772529	0.881809	0.762009	0.885175	0.752851	0.744378	0.824801
aPFC0690c_0	aPFC0690c_0::PFC0690c::hypothetical protein	NA	2.03309	2.79545	2.57441	2.44645	2.09441	1.82808	2.19176	3.08365	3.24681	2.00463	1.91031	2.04429	2.63734	2.67797
aPFF0135w_0	aPFF0135w_0::PFF0135w::hypothetical protein, conserved	0.279716	0.287623	0.350707	0.360607	0.540226	0.213181	0.287621	0.374479	0.34586	0.363197	0.279141	NA	0.323152	0.346843	NA
aPF11_0220_0	aPF11_0220_0::PF11_0220::hypothetical protein	3.12373	3.49924	3.11173	1.94673	1.62646	3.65275	3.90102	3.76882	2.83153	2.62853	3.99014	4.72912	4.43749	3.74056	3.41503
aPF14_0115_0	aPF14_0115_0::PF14_0115::hypothetical protein	1.04929	0.940745	0.615969	0.463637	0.542155	1.04097	1.01574	0.823855	0.646468	0.540572	1.10643	1.12335	0.782122	0.791068	0.51009
aPF10_0160_0	aPF10_0160_0::PF10_0160::3.8 protein	0.604868	0.531635	0.323926	0.307736	0.297124	0.572223	0.467708	0.32502	0.2699	0.265218	0.462608	0.475122	0.329006	0.368187	0.274934
aPF14_0704_0	aPF14_0704_0::PF14_0704::hypothetical protein	0.684381	0.613665	0.730746	0.669698	0.717728	0.825298	0.768284	0.683955	0.623842	0.660512	0.76426	0.721891	0.778609	0.769724	0.68675
aPFE1465w_2	aPFE1465w_2::PFE1465w::hypothetical protein	2.60973	2.60003	3.30302	2.72624	2.09916	2.85613	3.01224	3.58511	3.8578	3.36337	2.41209	2.86669	4.05111	4.02871	3.61041
aPF10_0045_1	aPF10_0045_1::PF10_0045::hypothetical protein	2.1213	2.17431	2.2662	1.51157	1.22708	2.48462	2.40202	2.37547	2.06708	1.69942	2.26577	2.59782	2.98564	2.9495	2.42761
aPF11_0271_0	aPF11_0271_0::PF11_0271::hypothetical protein, conserved	1.28215	1.40385	1.08273	0.821532	0.694576	1.82264	1.50288	1.17148	0.917985	0.766937	1.35406	1.47325	1.24577	1.07121	1.17227
aPF14_0156_0	aPF14_0156_0::PF14_0156::dimethyladenosine transferase, putative	0.383367	0.336425	0.34178	0.401277	0.389734	0.391455	0.375721	0.323607	0.307072	0.28549	0.354554	0.352351	0.262268	0.365519	0.449254
aPFA0255c_1	aPFA0255c_1::PFA0255c::hypothetical protein	1.06065	1.09961	1.4819	1.32448	1.14026	1.24418	1.12457	1.16442	1.53213	2.10654	NA	1.14054	1.28324	2.20512	3.69932
aMAL8P1.18_0	aMAL8P1.18_0::MAL8P1.18::hypothetical protein	1.79472	1.68213	1.42196	0.886604	0.715799	1.74659	1.73738	1.44846	0.893742	0.782141	1.73675	1.93609	1.35115	1.07921	0.918396
aMAL7P1.219_0	aMAL7P1.219_0::MAL7P1.219::	0.217241	0.238821	0.156862	0.385009	0.567237	0.216921	0.20859	0.590688	NA	0.361508	0.325289	0.284828	0.217776	0.164083	NA
aMAL13P1.211_0	aMAL13P1.211_0::MAL13P1.211::hypothetical protein	0.68722	NA	0.901636	1.15367	2.46381	0.60713	0.577833	1.12485	0.720812	2.00688	0.894826	0.666644	0.828955	2.13308	2.96344
aPFB0230c_1	aPFB0230c_1::PFB0230c::hypothetical protein	0.753955	NA	0.842972	0.845934	1.31584	0.58469	0.742373	0.895924	0.659397	1.04905	NA	0.654367	0.892181	0.769724	0.944134
aPF14_0508_0	aPF14_0508_0::PF14_0508::pyridine nucleotide transhydrogenase, putative	NA	0.392496	0.335403	0.254865	0.561449	0.311668	0.343331	0.538403	NA	0.506787	NA	0.428469	0.422674	0.50559	0.909036
aPFE0945c_0	aPFE0945c_0::PFE0945c::hypothetical protein	NA	0.468296	0.591738	0.299602	0.509356	0.344082	0.680184	1.16725	0.525255	1.01019	0.569537	0.969887	1.03034	0.428217	1.03422
aPF14_0195_2	aPF14_0195_2::PF14_0195::hypothetical protein	0.789452	0.964627	NA	1.28517	2.30561	0.289228	1.05979	1.49933	0.958389	2.13019	1.36644	NA	1.70474	1.39537	2.04036
aPF13_0175_0	aPF13_0175_0::PF13_0175::hypothetical protein, conserved	0.491277	0.446491	0.459107	0.364674	0.397452	0.567236	0.471594	0.447962	0.34586	0.378401	0.590923	0.482488	0.40394	0.346843	0.410646
aPF14_0270_0	aPF14_0270_0::PF14_0270::ribosomal protein L15, putative	1.68255	1.66551	1.31738	0.73477	0.686858	1.57953	1.96411	1.68586	1.03112	0.797344	1.67484	1.76912	1.39096	0.885783	0.630593
aPF14_0651_0	aPF14_0651_0::PF14_0651::hypothetical protein	NA	1.00097	NA	0.72528	0.613542	0.910071	0.844724	0.62743	0.462225	0.758491	0.935346	0.80783	NA	1.24063	2.21702
aPF14_0183_1	aPF14_0183_1::PF14_0183::RNA helicase, putative	0.298174	0.28347	NA	0.372808	0.630906	0.356548	0.317419	0.337738	0.370103	0.538883	0.276889	NA	NA	0.333502	0.359169
aPF11_0324_2	aPF11_0324_2::PF11_0324::hypothetical protein	0.604868	0.620933	0.64275	0.460926	0.449545	0.258061	0.629656	0.585036	0.418588	0.449351	0.642699	0.537735	0.601812	0.432219	0.780344
aPF10_0046_1	aPF10_0046_1::PF10_0046::hypothetical protein	1.1501	1.23667	1.50995	1.27704	1.09782	1.54213	1.42774	1.43433	1.48688	1.37339	1.23137	1.31978	1.55488	1.86761	NA
aPF07_0088_0	aPF07_0088_0::PF07_0088::40S ribosomal protein S5, putative	0.616227	0.537865	0.61852	0.34705	0.337641	0.65949	0.581719	0.436657	0.332931	0.293936	0.550402	0.564744	0.399257	0.32283	0.360339
aPF13_0235_1	aPF13_0235_1::PF13_0235::hypothetical protein	0.438742	0.515022	0.503743	0.536843	0.640553	0.538563	0.546739	0.599167	0.57374	0.719637	0.472738	0.5672	0.579566	0.589632	0.938285
aPF14_0722_4	aPF14_0722_4::PF14_0722::hypothetical protein	0.170385	NA	NA	NA	NA	NA	NA	NA	NA	NA	NA	0.190294	NA	NA	NA
aMAL13P1.35_1	aMAL13P1.35_1::MAL13P1.35::u1 small nuclear ribonucleoprotein a, putative	0.854766	0.802645	0.821292	0.760527	0.9589	0.905085	0.895252	0.787113	0.916368	0.979788	0.610057	0.833612	0.757534	0.839092	0.591985
aPFE0670w_0	aPFE0670w_0::PFE0670w::hypothetical protein	NA	0.507753	0.464208	NA	0.43411	0.487449	0.550625	0.67265	0.407275	0.530437	0.506505	0.712069	0.564345	0.566954	0.207078
aPF11_0414_1	aPF11_0414_1::PF11_0414::hypothetical protein	1.33468	1.41112	1.11461	0.661564	1.09782	1.24667	1.49511	1.30149	1.00203	1.20784	1.47562	1.56532	1.4577	1.27531	1.4706
aPFE1130w_0	aPFE1130w_0::PFE1130w::hypothetical protein	5.93793	6.20414	8.71029	6.9532	5.39261	6.36302	4.44387	4.50365	6.50993	5.64223	4.85907	4.378	4.53467	5.28401	4.32757
aPF08_0109_1	aPF08_0109_1::PF08_0109::hypothetical protein	2.14969	1.8223	2.20499	1.97927	1.5435	2.35247	2.05092	2.19176	2.49537	2.27209	1.63995	2.11411	1.93189	2.41989	2.58321
aPF14_0124_1	aPF14_0124_1::PF14_0124::actin II	0.264097	0.240897	0.302246	0.239953	0.37044	0.273021	0.256527	0.261429	0.226264	0.265218	NA	0.262729	0.22246	0.238788	0.321731
aPF14_0300_1	aPF14_0300_1::PF14_0300::syntaxin, putative	1.1714	1.24602	0.825118	0.592425	0.480415	0.661983	1.21785	1.01604	0.787075	0.513544	1.52739	1.07793	0.87696	0.900457	0.540508
aMAL8P1.110_0	aMAL8P1.110_0::MAL8P1.110::plastid 50S ribosomal protein L33, putative	1.1785	1.18268	1.42068	1.27839	1.15763	1.38131	1.25024	1.30291	1.21536	1.60482	1.23137	1.27313	1.16733	1.32734	1.36297
aPFC0150w_0	aPFC0150w_0::PFC0150w::hypothetical protein, conserved	1.82596	1.87838	2.55442	2.66252	2.95966	2.16672	2.2025	2.6256	3.28406	4.13031	1.9281	2.16444	3.03482	3.32569	2.78444
aPFI0225w_0	aPFI0225w_0::PFI0225w::hypothetical protein	0.822109	0.979164	1.12226	1.07233	1.26567	0.944978	1.06497	1.14887	1.22667	1.25176	1.01639	1.10125	1.12401	1.12991	1.33489
aPF07_0089_0	aPF07_0089_0::PF07_0089::hypothetical protein	0.782352	0.869099	0.795786	0.844579	1.43932	0.536069	1.06238	1.13474	0.89051	1.31427	0.866687	1.11476	1.03971	1.03786	1.53495
aPF10_0049_1	aPF10_0049_1::PF10_0049::hypothetical protein	2.8142	NA	1.49592	0.974722	0.920313	2.03457	2.94747	2.08437	1.2396	1.23825	3.36319	3.16748	1.94711	0.980497	1.13483
aPFI0885w_0	aPFI0885w_0::PFI0885w::heme binding protein, putative	2.15821	2.0144	2.05706	1.79083	1.79239	2.25648	2.18436	1.99251	2.29173	2.31264	2.08117	2.10429	1.80544	2.19445	2.32816
aPFB0380c_1	aPFB0380c_1::PFB0380c::hypothetical protein	1.85152	2.0279	1.91805	1.49665	1.25024	2.45096	2.13513	2.13665	1.87314	1.74504	1.91909	2.2332	2.5056	1.62216	1.00731
aPFB0700c_1	aPFB0700c_1::PFB0700c::hypothetical protein	1.22961	1.42877	1.48955	1.83015	2.0297	1.29031	1.25413	1.54455	2.47759	2.62347	1.24488	1.30628	1.63566	2.19445	1.66598
aPFB0095c_2	aPFB0095c_2::PFB0095c::erythrocyte membrane protein 3	0.00141988	NA	0.00382589	NA	NA	0.00124667	NA	0.00141313	NA	NA	NA	NA	NA	NA	NA
aPF11_0408_1	aPF11_0408_1::PF11_0408::hypothetical protein	1.58742	1.83996	1.70252	0.955743	0.731234	2.11934	1.92006	1.60956	1.28324	0.957827	1.53978	1.87471	1.77968	1.47675	0.951154
aPF13_0215_0	aPF13_0215_0::PF13_0215::hypothetical protein	0.897362	0.838987	1.0891	1.49123	2.24194	1.06341	0.983352	0.895924	1.38344	1.35481	0.912835	0.892542	0.927306	1.85427	1.77596
aMAL13P1.134_0	aMAL13P1.134_0::MAL13P1.134::helicase, putative	1.24949	1.26679	1.23959	1.02895	0.845067	1.54463	1.44976	1.26051	1.01172	0.897012	1.36531	1.32101	1.21416	0.908461	0.813102
aMAL7P1.17_2	aMAL7P1.17_2::MAL7P1.17::hypothetical protein	3.11095	3.63319	4.82063	3.53286	2.58344	4.74359	4.348	4.91345	5.32528	4.2891	3.0199	4.30311	5.5896	4.0007	2.44984
aMAL13P1.52_2	aMAL13P1.52_2::MAL13P1.52::hypothetical protein	0.313793	0.291776	0.350707	0.30638	0.333782	0.332862	0.314828	0.269908	0.235961	0.209472	0.305029	0.353579	0.332519	0.294816	0.366188
aPF10_0361_1	aPF10_0361_1::PF10_0361::hypothetical protein	0.644624	0.82445	0.72947	0.648007	0.825773	0.870178	0.860271	0.683955	0.657781	0.731462	0.63482	0.728029	0.652158	0.484246	0.569756
aPF10_0167_1	aPF10_0167_1::PF10_0167::hypothetical protein	0.956997	1.11311	0.846798	NA	0.854714	1.31524	NA	0.934079	NA	1.56935	NA	0.946561	1.04205	1.08055	3.47002
aPFD0830w_0	aPFD0830w_0::PFD0830w::bifunctional dihydrofolate reductase-thymidylate synthase	1.81034	1.18268	1.33906	1.12791	0.524791	1.76903	1.3228	1.27464	0.943843	0.510165	1.85493	1.04232	0.880472	0.692351	0.635273
aPF13_0233_0	aPF13_0233_0::PF13_0233::myosin a	0.542393	0.69881	1.61453	4.48454	9.69705	0.463762	0.559694	1.01463	3.36163	5.87535	0.487371	0.547556	0.955406	2.44124	3.70049
aPFE0450w_2	aPFE0450w_2::PFE0450w::chromosome condensation protein, putative	2.04746	2.07878	1.99074	1.30822	0.964688	2.71151	2.50956	2.3359	1.67597	1.42914	2.3378	2.55363	2.19181	1.80625	1.50804
aPFI0590c_0	aPFI0590c_0::PFI0590c::hypothetical protein	0.57505	0.563824	0.562406	0.5504	0.725446	0.579703	0.540261	0.563839	0.505861	0.516922	0.615685	0.552467	0.495266	0.574958	0.656331
aMAL13P1.328_1	aMAL13P1.328_1::MAL13P1.328::hypothetical protein	2.7432	2.68933	2.88217	2.8374	2.55835	3.11419	2.91637	2.76691	3.06749	3.21641	2.53928	2.78566	2.47867	2.28116	1.65779
aPFL1935c_1	aPFL1935c_1::PFL1935c::hypothetical protein	0.92292	0.95009	1.08145	0.763239	0.833491	1.04347	0.966509	1.06974	0.775762	NA	0.997252	NA	1.08186	0.871109	0.572096
aPFF0295c_0	aPFF0295c_0::PFF0295c::hypothetical protein	0.606287	0.590821	0.732021	0.820177	0.877867	0.638297	0.667228	0.78994	1.07799	1.42745	0.640448	0.669099	0.832468	1.72354	2.36209
aPFL2190c_2	aPFL2190c_2::PFL2190c::hypothetical protein	0.222921	0.330195	0.386415	0.403988	0.654059	0.305435	0.334262	0.614712	0.373335	0.582805	NA	0.424786	0.513999	NA	0.67505
aMAL13P1.339_0	aMAL13P1.339_0::MAL13P1.339::hypothetical protein	NA	0.311505	0.34433	0.23453	0.362723	NA	NA	0.44231	NA	0.471312	NA	0.316748	0.324323	0.48558	0.900847
aPFI0495w_1	aPFI0495w_1::PFI0495w::hypothetical protein	1.53347	1.67901	1.61963	1.02624	0.881725	2.08693	1.77625	1.63217	1.14263	1.10986	1.64558	1.92381	1.72114	1.44206	1.75607
aPFA0385w_1	aPFA0385w_1::PFA0385w::hypothetical protein	0.911561	0.890904	0.535625	0.456859	0.640553	0.777924	0.778649	0.932666	0.471922	0.826062	0.77439	0.88272	0.683771	0.765722	0.350979
aPF07_0039_0	aPF07_0039_0::PF07_0039::hypothetical protein	1.45821	1.52118	1.36202	0.831022	0.654059	1.38879	1.54952	1.32693	0.982631	0.729773	1.35293	1.42168	1.1322	0.864438	0.622403
aPF11_0426_0	aPF11_0426_0::PF11_0426::hypothetical protein	1.04219	NA	NA	0.939475	1.22708	0.987365	0.980761	1.07822	0.850105	NA	NA	0.964976	1.2048	1.44873	1.87891
aMAL13P1.225_0	aMAL13P1.225_0::MAL13P1.225::thioredoxin, putative	0.407505	0.366538	0.513945	0.723925	1.74609	0.447556	0.365356	0.408395	0.594751	1.05243	0.401827	0.368312	0.365302	0.509592	0.472652
aMAL8P1.1_2	aMAL8P1.1_2::MAL8P1.1::conserved hypothetical protein, conserved in P. falciparum	0.211562	NA	NA	NA	0.285548	0.209441	0.250049	0.373066	0.126061	NA	NA	0.219759	0.259927	0.250794	0.536998
aPF11_0357_1	aPF11_0357_1::PF11_0357::hypothetical protein	0.890263	1.056	1.36329	1.77321	1.82519	0.852724	1.12587	1.42302	1.70021	2.29237	0.793525	1.24858	1.74924	2.15309	2.35039
aPFI0825w_0	aPFI0825w_0::PFI0825w::hypothetical protein	0.986815	0.982279	1.07508	0.87847	0.68107	1.29654	1.14141	1.16725	1.1895	0.868295	0.931969	1.10248	1.09122	1.10056	1.07751
aPFL1645w_3	aPFL1645w_3::PFL1645w::hypothetical protein	0.80791	0.990586	1.31611	1.1374	0.910666	1.11577	0.726825	1.18279	1.06182	0.957827	0.907207	1.05337	1.23641	0.948481	0.879788
aPF13_0273_0	aPF13_0273_0::PF13_0273::hypothetical protein, conserved	0.623326	0.667659	0.586637	0.403988	0.397452	0.729304	0.640021	0.575144	0.437982	NA	0.62469	0.649456	0.509316	0.457565	0.498391
aPF11_0375_0	aPF11_0375_0::PF11_0375::hypothetical protein	1.05355	1.00616	0.960299	1.19841	1.40073	0.951212	1.03647	0.999083	1.16203	1.12507	0.979243	1.18842	1.09942	1.24997	0.966363
aPF14_0171_1	aPF14_0171_1::PF14_0171::hypothetical protein	2.00629	2.34563	2.77505	3.14785	2.30175	2.88605	2.86196	3.26716	3.50224	3.24512	2.37382	3.16993	3.27367	2.47192	2.19245
aPFL0075w_1	aPFL0075w_1::PFL0075w::XPA binding protein 1, putative	0.356389	0.465181	0.454006	0.357895	0.547943	0.427609	0.411997	0.428178	0.332931	0.398672	0.450227	0.40146	0.384036	0.405539	0.407136
aPF13_0090_0	aPF13_0090_0::PF13_0090::ADP-ribosylation factor, putative	0.983975	1.05808	2.08256	3.98023	6.08718	0.61087	0.969101	1.61097	3.0384	3.4546	0.718112	0.902363	1.62513	2.53195	2.9611
aPFA0470c_0	aPFA0470c_0::PFA0470c::cold-shock protein, putative	0.4643	0.398726	0.317549	0.277911	0.447615	NA	0.357583	0.521445	0.583437	0.52199	0.517761	0.477577	0.37584	0.436221	0.295993
aPF14_0631_2	aPF14_0631_2::PF14_0631::hypothetical protein	1.34604	1.5326	2.41797	2.9567	3.52304	1.3863	1.57025	1.71413	2.13334	2.66063	1.11544	1.38853	2.25738	2.9495	5.79584
aPFC0395w_1	aPFC0395w_1::PFC0395w::asparagine synthetase, putative	0.986815	0.796414	0.911838	0.661564	0.630906	0.841504	0.811039	0.644387	0.517174	0.486515	0.747376	0.70102	0.592446	0.514928	0.608364
aPF10_0338_0	aPF10_0338_0::PF10_0338::hypothetical protein	2.19939	2.05282	1.73951	1.77863	1.63804	2.07571	1.71536	1.78478	1.68567	2.04066	2.39633	1.86734	1.66377	2.68003	3.36004
aPF14_0487_0	aPF14_0487_0::PF14_0487::hypothetical protein	0.609127	0.618857	0.744774	0.652074	0.791045	0.796624	0.651681	0.53275	0.575357	0.591251	0.567286	0.654367	0.633425	0.760386	1.13483
aMAL13P1.88_1	aMAL13P1.88_1::MAL13P1.88::hypothetical protein	0.870385	0.899211	0.863377	0.738837	0.68107	1.08336	0.927642	0.873314	0.892126	1.00851	0.696726	1.00181	0.896864	1.16859	1.12196
aMAL8P1.81_0	aMAL8P1.81_0::MAL8P1.81::hypothetical protein, conserved	3.40912	3.17008	4.30541	2.72217	2.68376	3.90957	3.63283	3.79143	3.96285	2.68766	2.70136	3.01402	NA	NA	1.6496
aPFF1370w_4	aPFF1370w_4::PFF1370w::P. falciparum PK4 protein kinase	1.13448	1.15776	1.45894	1.052	0.937677	1.33768	1.26061	1.37921	1.15718	NA	1.01414	1.28295	1.41555	1.06454	1.40158
aPFC0120w_1	aPFC0120w_1::PFC0120w::Cytoadherence linked asexual protein, CLAG	2.96754	3.16074	4.74921	5.47146	5.74376	3.3174	3.1133	3.45086	5.0279	6.07637	3.05929	3.08891	3.51135	3.66986	3.46417
aPF11_0445_0	aPF11_0445_0::PF11_0445::DNA-directed RNA polymerase I, putative	0.620486	0.62301	0.684835	0.588358	0.559519	0.66323	0.628361	0.620364	0.625458	0.59294	0.679842	0.65805	0.662696	0.654999	0.547528
aPFE1460w_0	aPFE1460w_0::PFE1460w::hypothetical protein	NA	0.74242	0.623621	0.497529	0.482344	0.977392	0.808448	0.702326	0.470305	0.513544	0.835171	0.650684	0.690796	0.617647	0.411816
aPFL1955w_1	aPFL1955w_1::PFL1955w::erythrocyte membrane protein 1 (PfEMP1)	0.248478	0.205593	0.272914	0.176236	0.160138	0.190741	NA	0.224688	NA	0.14359	0.247625	0.0687515	0.0819589	0.144073	0.116993
aPFI0225w_2	aPFI0225w_2::PFI0225w::hypothetical protein	0.772413	0.975011	1.50358	2.47138	4.83502	0.921291	0.965214	1.32693	1.90062	2.85828	0.741749	0.89868	1.25163	1.53545	1.83211
aPFL0955c_0	aPFL0955c_0::PFL0955c::phosphatidylethanolamine-binding protein, putative	0.597768	0.651045	0.497366	0.35654	0.694576	0.527343	0.585606	0.702326	0.311921	NA	0.65508	0.643317	0.593616	0.703023	0.705468
aPFI1010w_1	aPFI1010w_1::PFI1010w::hypothetical protein	1.1572	1.3862	1.78032	3.42034	5.86531	1.73911	1.68297	2.40091	NA	4.48675	1.56454	1.87348	2.24801	2.2398	2.1129
aPFB0050c_0	aPFB0050c_0::PFB0050c::stevor isoform gam beta	0.407505	0.275163	0.230829	0.474482	0.482344	0.431349	0.437909	0.74472	0.192324	0.483137	NA	0.472666	0.556149	0.390865	0.16847
aPFE0655w_2	aPFE0655w_2::PFE0655w::hypothetical protein	1.11176	1.33532	1.084	0.839156	0.764033	1.05593	1.12587	0.939731	0.89051	0.751734	1.05466	1.22034	0.987019	0.783064	0.584966
aPFI1265w_0	aPFI1265w_0::PFI1265w::hypothetical protein	1.32475	1.27302	1.19113	1.04115	0.879796	1.41248	1.26579	1.18138	0.981015	0.954448	1.3338	1.40327	1.13572	1.13791	1.3267
aPFF0445w_4	aPFF0445w_4::PFF0445w::hypothetical protein	1.17424	1.20137	1.69615	1.30279	1.23866	1.31275	1.36814	1.44705	1.49496	1.42914	1.33042	1.37871	1.72231	1.41538	1.41211
aPFI0170w_1	aPFI0170w_1::PFI0170w::hypothetical protein	0.719878	0.784993	0.816191	0.660208	0.723516	0.901345	0.786423	0.706565	0.602831	0.562533	0.739498	0.752583	0.763388	0.634989	0.724187
aPFL1340c_1	aPFL1340c_1::PFL1340c::hypothetical protein	1.82738	1.52222	2.06343	2.33852	2.15318	2.01836	1.9084	2.18894	2.89133	3.6438	1.22462	1.93486	2.34285	3.32302	3.8713
aPF14_0439_1	aPF14_0439_1::PF14_0439::leucine aminopeptidase, putative	0.502636	0.557594	0.572609	0.482616	0.383946	0.68567	0.611518	0.503074	0.470305	0.420633	0.592048	0.553695	0.410965	0.364185	0.430535
aPF11_0360_0	aPF11_0360_0::PF11_0360::hypothetical protein	1.71805	1.94275	0.999834	0.713079	0.953112	2.38115	1.92395	1.61379	0.951924	1.03384	NA	2.3621	1.37223	1.05787	1.01316
aPF10_0066_0	aPF10_0066_0::PF10_0066::hypothetical protein	0.682961	0.640662	0.633823	0.528709	0.547943	0.630817	0.743668	0.751785	0.547882	0.50003	0.651703	0.640862	0.533903	0.406873	0.315881
aPFL2370c_0	aPFL2370c_0::PFL2370c::hypothetical protein	1.62434	1.71432	1.83898	1.19976	1.12097	1.52717	1.84103	1.62934	1.33819	1.10817	1.59943	1.60829	1.74924	1.318	1.04358
aPFC0060c_1	aPFC0060c_1::PFC0060c::Serine/threonine protein kinase, putative	0.951318	0.84314	0.959024	1.16045	1.50298	0.706864	0.830473	1.01887	1.17334	1.0254	0.751879	0.766088	0.887497	1.06854	1.13834
aPFL0325w_1	aPFL0325w_1::PFL0325w::hypothetical protein	1.65416	2.11097	1.22429	1.58613	3.27801	1.64935	1.92136	2.07447	1.90385	3.86003	1.54991	1.96064	1.9998	2.22913	2.31646
aPFE1530c_0	aPFE1530c_0::PFE1530c::hypothetical protein, conserved	0.494117	0.485948	0.492265	0.447369	0.46498	0.380235	0.529896	0.515792	0.415356	0.344615	0.387195	0.453023	0.423844	0.325498	0.545188
aPFL1990c_2	aPFL1990c_2::PFL1990c::hypothetical protein	2.14969	2.55538	1.82878	3.62776	4.58227	1.94855	3.18974	4.18286	3.00446	6.41761	1.98663	3.13065	4.46442	5.55082	4.96051
aPF14_0486_0	aPF14_0486_0::PF14_0486::elongation factor 2	0.80791	0.737228	0.844247	0.458214	0.380087	0.780417	0.853793	0.601993	0.386265	0.334479	0.973615	0.785731	0.510487	0.314826	0.379058
aPF11_0067_1	aPF11_0067_1::PF11_0067::hypothetical protein	0.323732	0.304237	0.510119	0.973367	2.49661	0.329122	0.309646	0.358935	0.630306	1.6724	0.324163	0.311837	0.346569	0.448227	0.491371
aPFF0740c_0	aPFF0740c_0::PFF0740c::hypothetical protein	1.85152	1.76	2.02772	1.26755	1.11904	2.68409	2.25303	1.97414	1.72122	1.28048	1.75363	2.19759	2.05014	1.47408	1.85083
aPF11_0488_2	aPF11_0488_2::PF11_0488::hypothetical protein	1.1501	1.19722	1.2957	1.14554	1.09203	1.29779	1.28393	1.12909	0.943843	1.05918	1.20323	1.29155	1.30666	1.05654	1.3735
aPFC0820w_0	aPFC0820w_0::PFC0820w::hypothetical protein	2.05598	2.66337	3.83355	4.26627	5.55854	2.05576	2.28671	3.45934	4.35396	5.40235	2.1262	2.50206	3.95393	3.61917	3.21731
aPF13_0139_0	aPF13_0139_0::PF13_0139::hypothetical protein	NA	1.2211	0.842972	0.711724	0.918383	0.933758	1.18676	1.25627	NA	0.979788	1.00175	1.24121	1.22821	1.02452	0.531149
aPF11_0479_0	aPF11_0479_0::PF11_0479::hypothetical protein	1.50791	1.65409	2.20627	1.74338	2.79181	2.00216	2.33465	2.04904	NA	2.52549	1.36306	1.98643	2.29836	2.09573	3.70283
aPF14_0438_1	aPF14_0438_1::PF14_0438::hypothetical protein	0.477079	0.479718	0.478237	0.455503	0.671423	0.391455	0.478072	0.599167	0.501013	0.599698	0.518886	0.55124	0.518683	0.907127	1.53846
aMAL13P1.380_10	aMAL13P1.380_10::MAL13P1.380::chloroquine resistance marker protein, putative	1.86856	1.99052	2.19734	2.25989	2.45224	0.772937	1.84362	4.15319	2.26587	2.72313	2.52465	2.19759	4.83674	2.98551	0.994441
aPFA0020w_0	aPFA0020w_0::PFA0020w::rifin	0.153347	0.149522	0.160688	NA	0.173644	0.144614	0.126968	0.168162	0.114748	NA	0.176714	0.147325	0.163918	0.148075	0.153261
aPFL0100c_1	aPFL0100c_1::PFL0100c::ATP dependent RNA helicase, putative	0.313793	0.412225	0.605767	NA	0.46305	0.488696	0.485846	0.512966	0.483235	0.49834	0.443473	0.482488	0.429699	0.490916	0.713658
aPFI0805w_1	aPFI0805w_1::PFI0805w::hypothetical protein	1.1998	1.59075	1.27785	0.923207	0.68107	2.08319	2.07812	1.45835	0.91152	0.78383	1.50713	2.13743	1.16499	0.732372	1.29862
aPF08_0117_0	aPF08_0117_0::PF08_0117::hypothetical protein	0.69858	0.619895	0.581536	0.416189	0.430251	0.617103	0.664637	0.593515	0.368487	0.349683	0.511007	0.627357	0.611179	0.469572	0.524129
aPFC0230c_1	aPFC0230c_1::PFC0230c::hypothetical protein	1.22677	1.37789	1.31228	1.00048	0.748598	1.41622	1.3811	1.29443	0.935762	0.897012	1.11881	1.35293	1.3172	NA	1.62971
aPFL0385c_1	aPFL0385c_1::PFL0385c::blood stage antigen 41-3 precursor	0.658823	0.535789	0.353258	NA	0.669494	0.499916	0.548034	0.66841	0.326466	0.609833	NA	0.536507	0.625229	0.633655	0.310032
aPF08_0114_2	aPF08_0114_2::PF08_0114::hypothetical protein	1.10892	1.34985	0.990907	0.680543	0.738951	NA	1.24506	1.06409	0.724044	0.638551	1.27077	1.26822	1.15328	0.745712	0.466802
aMAL7P1.89_3	aMAL7P1.89_3::MAL7P1.89::hypothetical protein	0.604868	0.771494	0.482063	0.477194	1.31391	0.445062	0.72553	0.928426	0.488083	0.851402	0.891449	0.871671	0.917939	0.8551	0.710148
aPF13_0181_1	aPF13_0181_1::PF13_0181::hypothetical protein, conserved	0.516835	0.848332	0.492265	0.535487	1.2348	0.398935	0.860271	1.17007	NA	1.15885	0.776641	0.935511	1.11932	0.875111	0.664521
aPFC0165w_2	aPFC0165w_2::PFC0165w::hypothetical protein	1.65132	2.14004	2.0239	1.40311	1.15763	1.69548	2.10792	2.08719	1.72122	1.3717	1.89883	2.06991	2.38032	1.32067	1.59228
aPF13_0101_2	aPF13_0101_2::PF13_0101::hypothetical protein	0.952737	0.968781	0.859551	0.727992	0.808409	1.02352	0.983352	1.09235	0.825863	NA	0.673089	1.12335	1.19192	1.10456	0.835331
aPF14_0083_0	aPF14_0083_0::PF14_0083::ribosomal protein S8e, putative	0.888843	0.706078	0.675908	0.370096	0.314488	0.968665	0.873227	0.593515	0.402426	0.287179	0.739498	0.737851	0.449603	0.297484	0.228137
aPF14_0631_1	aPF14_0631_1::PF14_0631::hypothetical protein	1.35314	1.18683	0.961575	1.19976	1.77696	0.992352	0.887478	1.21247	1.19273	2.46298	1.21449	1.44255	1.78202	1.79024	1.19684
aPFC0830w_0	aPFC0830w_0::PFC0830w::trophozoite stage antigen, PFC0830w	0.522515	0.561747	0.885057	2.54187	5.09548	0.428856	0.527305	0.797005	2.18345	3.30087	0.361307	0.546329	0.756363	1.7769	2.53992
aPF10_0170_0	aPF10_0170_0::PF10_0170::hypothetical protein	0.522515	0.520213	1.23959	4.06564	7.99341	0.441322	0.502689	1.02735	3.57335	5.38883	0.383818	0.448112	0.882814	2.22379	3.21731
aPF11_0222_0	aPF11_0222_0::PF11_0222::hypothetical protein	0.495537	0.608473	0.641475	0.660208	0.55759	0.422622	0.573946	0.900164	NA	0.662201	0.444599	0.369539	0.546783	1.06721	2.09184
aPFD0005w_3	aPFD0005w_3::PFD0005w::erythrocyte membrane protein 1 (PfEMP1)	0.22718	0.231552	NA	NA	NA	0.150847	0.207294	0.269908	NA	NA	0.279141	0.213621	0.224801	NA	0.0900847
aPF14_0519_0	aPF14_0519_0::PF14_0519::ribosomal protein S11, putative	0.877484	0.929323	0.584086	0.447369	0.534437	0.635803	0.914686	0.917121	0.57374	0.638551	0.796901	1.0988	0.902718	0.759052	0.464463
aPF10_0217_0	aPF10_0217_0::PF10_0217::pre-mRNA splicing factor, putative	0.80507	0.775647	0.733296	0.54091	0.430251	0.907578	0.782536	0.753198	0.463841	0.413876	0.676466	0.696109	0.577225	0.501588	0.521789
aPFI0215c_0	aPFI0215c_0::PFI0215c::signal peptidase, putative	2.32718	2.14419	1.47042	0.935408	0.875937	2.47465	1.89156	1.65054	1.12162	1.02709	2.28265	2.26512	1.61927	1.1886	0.693769
aPF10_0195_1	aPF10_0195_1::PF10_0195::hypothetical protein	1.38012	1.083	0.706515	0.574802	1.77696	1.01604	0.987239	1.33965	0.827479	2.06431	1.10981	1.80227	1.6462	1.80625	0.574436
aPFE0965c_0	aPFE0965c_0::PFE0965c::vacuolar ATP synthetase, putative	1.70385	1.47861	1.98309	1.73254	1.97761	1.66556	1.74257	1.57423	1.68082	1.52374	1.53415	1.58497	1.26334	0.963155	0.84118
aPF14_0096_0	aPF14_0096_0::PF14_0096::hypothetical protein	0.880324	0.873252	0.758802	0.740193	0.738951	0.891371	0.905617	0.829507	0.678791	0.694298	0.691098	0.945333	0.840664	0.787066	0.785024
aPFB0150c_1	aPFB0150c_1::PFB0150c::protein kinase, putative	0.995334	1.35297	1.62983	2.6937	4.44336	1.12076	1.26579	1.92751	2.70062	3.29411	NA	1.32715	2.08644	1.87829	1.76426
aPFC0960c_2	aPFC0960c_2::PFC0960c::hypothetical protein	2.67789	2.90011	3.39102	1.80303	1.60331	3.26753	3.25063	2.95344	2.72648	1.92241	2.39296	2.34492	3.41417	NA	2.19245
aMAL13P1.322_1	aMAL13P1.322_1::MAL13P1.322::splicing factor, putative	0.871805	0.851447	0.956473	0.911006	0.910666	0.944978	0.93412	1.04572	0.908288	1.02878	0.984871	1.03741	0.942527	1.28732	0.856389
aPF11_0196_0	aPF11_0196_0::PF11_0196::hypothetical protein	0.830628	0.685311	0.66443	0.437879	0.762104	0.787897	0.763102	0.986365	0.452528	0.778762	NA	1.01286	0.813734	0.584296	NA
aMAL7P1.170_0	aMAL7P1.170_0::MAL7P1.170::ring stage expressed protein	0.105071	0.0934515	0.154311	0.271133	0.625118	0.115941	0.0932824	0.11305	0.189092	0.344615	0.135068	0.0785731	0.096009	0.158747	0.242176
aMAL8P1.148_0	aMAL8P1.148_0::MAL8P1.148::hypothetical protein	0.762474	0.672851	0.85445	0.538199	NA	0.482462	0.733303	0.870488	0.631922	0.758491	0.805906	0.783276	0.823101	0.765722	0.712488
aPFL0410w_0	aPFL0410w_0::PFL0410w::hypothetical protein	NA	0.264779	0.294594	NA	0.810338	NA	0.256527	0.421113	NA	0.701055	0.275764	0.354807	0.393403	0.273472	NA
aPFE1140c_0	aPFE1140c_0::PFE1140c::G10 protein, putative	1.49087	1.41423	1.44746	1.01946	1.1885	1.36012	1.39664	1.54596	1.12647	1.09635	1.40358	1.35416	1.30666	NA	0.763965
aMAL13P1.114_0	aMAL13P1.114_0::MAL13P1.114::hypothetical protein	2.07728	2.55019	2.57865	2.34937	2.24772	2.48961	2.31133	2.78669	3.28406	4.46648	2.07892	2.5168	2.72338	3.83128	4.05147
aPF10_0014_0	aPF10_0014_0::PF10_0014::hypothetical protein	0.11927	0.0404957	0.0306072	0.0610049	NA	0.0523603	0.0349809	NA	NA	0.0337858	0.0393948	0.0306926	0.0281002	0.0346843	NA
aPF14_0303_0	aPF14_0303_0::PF14_0303::hypothetical protein	3.57099	NA	3.2061	3.41898	5.37332	4.31972	4.26767	4.86682	3.4683	2.52042	4.32218	3.14292	4.51125	3.60049	3.35653
aMAL13P1.360_0	aMAL13P1.360_0::MAL13P1.360::hypothetical protein, conserved	1.19554	1.1858	1.22046	1.77321	2.21492	1.20803	1.0572	1.06267	1.38021	1.54739	1.00513	1.00181	1.20948	1.46341	1.55133
aMAL13P1.360_1	aMAL13P1.360_1::MAL13P1.360::hypothetical protein, conserved	1.23245	1.49522	1.45767	2.30734	2.84969	0.852724	1.36296	1.34954	1.92001	2.08627	1.20323	1.26576	1.39096	1.33534	1.22258
aPF11_0262_0	aPF11_0262_0::PF11_0262::hypothetical protein	1.64706	1.36232	1.07125	0.791708	NA	1.56083	1.50547	1.37215	1.11192	0.946002	1.67372	1.57269	NA	1.54212	1.21439
aPF14_0261_0	aPF14_0261_0::PF14_0261::proliferation-associated protein 2g4, putative	0.80933	0.691541	0.692487	0.5504	0.410957	0.860204	0.66075	0.548294	0.555962	0.383469	0.724865	0.588071	0.440236	0.528268	0.425855
aPF10_0343_0	aPF10_0343_0::PF10_0343::S-antigen	0.0979715	0.059186	0.0841697	0.0976078	0.0250819	0.0374002	0.0233206	0.0141313	0.00646468	0.00506787	0.578541	0.00491082	0.00585421	0.00800406	0.0116993
aPFE1305c_0	aPFE1305c_0::PFE1305c::hypothetical protein	1.87282	1.63748	1.72675	1.66882	1.63804	1.71667	1.77107	1.84837	1.95072	1.7028	1.67034	NA	1.75158	1.93031	1.7818
aPF14_0727_1	aPF14_0727_1::PF14_0727::hypothetical protein	1.1501	1.23875	1.25999	1.36109	2.35384	1.47357	1.33705	1.50357	1.27031	1.88356	1.36081	1.23139	1.50921	1.44607	1.58643
aMAL13P1.535_0	aMAL13P1.535_0::MAL13P1.535::null	0.513995	0.49737	0.763903	0.530065	0.544084	0.533576	0.480664	0.620364	0.355557	0.709501	0.569537	0.435835	0.448432	0.352179	0.369698
aPFL0165c_0	aPFL0165c_0::PFL0165c::hypothetical protein	1.11034	1.18787	1.14267	0.810687	0.943465	1.43741	1.14401	1.09094	0.937379	1.00006	1.12894	1.07301	1.17084	1.06321	1.1477
aPFL1595w_0	aPFL1595w_0::PFL1595w::hypothetical protein, conserved	88.1531	5.0848	2.30191	1.34075	7.38951	1.69797	1.59876	1.09518	0.969702	0.54564	2.65184	1.00303	0.880472	0.677677	0.935945
aPFF0995c_0	aPFF0995c_0::PFF0995c::Merozoite surface protein 10, MSP10	2.69209	2.83989	3.9649	4.37608	6.11613	2.76263	3.11719	3.82534	4.96326	6.42943	2.48525	2.85564	4.02184	3.76191	2.79964
aPF07_0075_0	aPF07_0075_0::PF07_0075::hypothetical protein	0.492697	0.486986	0.348156	0.246731	0.387805	0.302942	0.34074	0.320781	0.22788	0.293936	0.452478	0.408826	0.314956	0.346843	0.276104
aPFC0165w_1	aPFC0165w_1::PFC0165w::hypothetical protein	1.61582	1.87111	2.24197	1.36515	1.13254	2.01088	2.07294	1.82576	1.63718	1.4511	1.83355	1.93486	2.07239	1.40871	1.91518
aPF13_0035_1	aPF13_0035_1::PF13_0035::hypothetical protein	0.619066	0.665582	0.867203	0.799842	0.758245	0.760471	0.707392	0.739067	0.809701	0.920663	0.568411	0.653139	0.739972	1.07254	1.5057
aMAL13P1.116_3	aMAL13P1.116_3::MAL13P1.116::hypothetical protein	NA	0.776686	0.766454	0.798486	0.947324	0.679437	0.89007	0.743306	0.808085	0.773694	0.757507	0.864304	0.844176	0.614979	0.644632
aPFI0440w_0	aPFI0440w_0::PFI0440w::hypothetical protein	1.36734	1.71016	1.0891	0.831022	1.13833	0.62957	1.33705	1.67739	1.18788	1.29062	1.68497	1.55305	1.71997	1.50743	1.09155
aPFF1475c_1	aPFF1475c_1::PFF1475c::hypothetical protein	3.7144	3.94885	3.9394	3.50439	2.30561	3.1304	3.94248	3.74056	4.14063	3.19276	4.23663	4.19384	3.24674	2.86679	1.54197
aPFE0705c_1	aPFE0705c_1::PFE0705c::helicase, belonging to UvrD family, putative	2.22921	2.35705	2.65007	2.08772	1.55701	2.71525	2.55101	2.39384	2.48082	1.97816	2.44023	2.43086	2.70464	2.34119	1.98186
aPF10_0224_2	aPF10_0224_2::PF10_0224::dynein heavy chain, putative	0.481338	0.455836	0.49354	0.394498	0.58846	0.489942	0.536374	0.852117	0.331315	0.697676	0.452478	0.570883	0.698992	0.484246	1.0038
aPF10_0166_0	aPF10_0166_0::PF10_0166::hypothetical protein	2.60405	2.49827	3.28007	3.57082	3.09472	2.17794	2.50178	3.62468	4.08729	4.02895	2.24663	2.31054	2.81236	3.26566	1.45071
aPF11_0278_0	aPF11_0278_0::PF11_0278::hypothetical protein	1.09047	1.56064	2.61309	3.82433	5.80357	1.16564	1.68297	2.60581	3.95638	4.96144	0.978118	1.38731	2.05717	3.04021	4.44574
aPFI0605c_0	aPFI0605c_0::PFI0605c::hypothetical protein, conserved	1.51217	1.3592	1.25107	0.848646	0.785256	1.54961	1.3798	1.20681	0.924449	0.937555	1.32817	1.46711	1.06429	0.99784	0.802573
aPFI0880c_1	aPFI0880c_1::PFI0880c::acid phosphatase, putative	4.06227	3.96754	3.72897	3.27122	2.25351	4.45561	3.78312	3.89741	3.71234	3.41574	3.91472	4.26136	3.70922	3.6125	1.92571
aPFL0790w_0	aPFL0790w_0::PFL0790w::hypothetical protein	1.63996	1.72885	1.90785	1.10758	0.956971	1.84383	1.74127	1.47813	1.1394	1.02371	NA	1.85997	1.79256	1.52211	NA
aPF13_0024_1	aPF13_0024_1::PF13_0024::hypothetical protein	1.85152	1.75689	2.15015	1.41125	1.08431	2.37242	2.03537	1.97556	1.88445	1.46124	1.66809	1.86857	2.23162	2.31584	1.38169
aPF14_0170_2	aPF14_0170_2::PF14_0170::hypothetical protein	0.877484	1.02485	1.34289	1.51292	1.36407	1.12575	1.02481	1.13474	1.25415	1.49164	1.29103	0.928145	1.27973	1.4554	2.13395
aPFL1130c_3	aPFL1130c_3::PFL1130c::hypothetical protein	0.951318	1.11311	1.04574	0.826955	0.756316	0.861451	1.087	1.26899	0.968086	1.06256	1.19648	1.20315	1.26217	0.955151	0.554547
aPFF1275c_0	aPFF1275c_0::PFF1275c::3-oxoacyl-[acyl-carrier-protein] synthase i/ii	1.26795	1.18164	NA	0.929985	0.810338	1.26787	1.43292	1.22801	1.15879	1.17743	1.46774	1.0988	1.15445	1.40071	1.81807
aPFI1260c_0	aPFI1260c_0::PFI1260c::Histone deacetylase	1.21116	1.31663	1.57627	1.11029	0.800691	1.42869	1.39664	1.26193	1.19597	0.859848	1.27077	1.32347	1.30549	1.27131	1.42381
aMAL13P1.234_6	aMAL13P1.234_6::MAL13P1.234::hypothetical protein	2.47627	2.39132	2.05706	2.32225	1.92745	1.86876	2.12736	2.6256	2.84446	2.64374	2.14983	2.2909	3.28421	2.68003	1.84147
aPF11_0176_1	aPF11_0176_1::PF11_0176::hypothetical protein	1.86714	2.31033	1.65661	1.03708	1.29654	2.81249	1.92654	1.83566	1.11354	NA	NA	2.37684	1.71294	1.45007	1.34074
aMAL13P1.405_1	aMAL13P1.405_1::MAL13P1.405::erythrocyte membrane protein pfemp3, putative	2.87809	3.81178	5.67763	7.61748	10.0559	2.7913	3.09128	4.41038	7.74469	10.3537	3.01202	3.31603	6.32371	7.4251	5.87422
aPF13_0331_0	aPF13_0331_0::PF13_0331::hypothetical protein, conserved	1.17566	0.869099	0.6402	0.436524	0.559519	1.17686	0.908208	0.662758	0.480002	0.510165	1.00738	0.847116	0.632254	0.725701	0.609534
aPFE1295c_0	aPFE1295c_0::PFE1295c::hypothetical protein	0.759634	0.795376	0.593014	0.547688	0.563378	0.676943	0.838246	0.610472	0.481619	0.591251	0.827292	0.864304	0.795001	0.896455	1.16993
aPF14_0479_0	aPF14_0479_0::PF14_0479::hypothetical protein	1.02657	1.06327	1.30846	1.28924	1.03029	1.22423	1.1466	1.37356	1.49981	1.52036	1.16834	1.23875	1.45887	1.31133	1.29979
aPFF0955c_0	aPFF0955c_0::PFF0955c::hypothetical protein	NA	2.10785	2.75592	2.16771	1.58788	2.66663	2.47457	2.45743	2.73294	2.07445	1.24037	2.25529	3.02662	2.36387	4.14858
aMAL7P1.127_2	aMAL7P1.127_2::MAL7P1.127::hypothetical protein	1.78621	2.18573	1.55969	1.13876	0.980124	1.22423	NA	2.27938	1.25415	1.19433	2.30291	2.25775	2.10517	1.28465	1.21088
aPFD0960c_0	aPFD0960c_0::PFD0960c::unknown	0.884583	0.899211	0.980704	0.877115	0.77368	0.937498	0.875818	0.986365	1.17172	1.06932	0.747376	0.909729	0.895693	1.04853	0.769815
aPFC0365w_0	aPFC0365w_0::PFC0365w::conserved protein, putative	0.792291	0.695695	0.689936	0.536843	0.648271	0.913811	0.817517	0.60058	0.643236	0.603076	0.837422	0.821335	0.728263	0.626985	1.82977
aPFL1475w_0	aPFL1475w_0::PFL1475w::sun-family protein, putative	0.637525	0.591859	0.696313	0.635806	0.812268	0.64079	0.611518	0.60482	0.585054	0.739909	0.697852	0.613853	0.576054	0.751048	0.770985
aPFI0465c_1	aPFI0465c_1::PFI0465c::hypothetical protein	2.73042	2.56992	2.74827	1.38142	1.06695	2.28266	2.44866	1.99534	1.29617	1.33792	2.71149	1.98397	1.7586	1.38604	1.03188
aPF14_0271_0	aPF14_0271_0::PF14_0271::hypothetical protein	0.709939	0.590821	0.767729	0.593781	1.11132	0.791637	0.782536	0.9256	0.690105	1.00513	0.929718	0.871671	1.11698	0.756384	1.51623
aPF08_0040_1	aPF08_0040_1::PF08_0040::hypothetical protein	0.492697	0.389381	0.314999	0.273844	0.382017	0.426362	0.387381	0.373066	0.255355	0.420633	0.431092	0.428469	0.332519	0.400203	0.577946
aPFL0290w_1	aPFL0290w_1::PFL0290w::hypothetical protein	1.06917	1.30728	1.34927	1.96707	2.13775	1.42993	1.38498	1.45694	1.7794	1.91734	1.04903	1.31733	1.54434	1.35669	1.04358
aPF10_0138_0	aPF10_0138_0::PF10_0138::hypothetical protein	1.41846	2.03932	4.43931	8.59084	12.6644	1.50847	1.90452	3.12726	7.20812	7.98696	1.36081	1.69792	3.0758	3.60983	2.80315
aPFB0150c_4	aPFB0150c_4::PFB0150c::protein kinase, putative	1.37586	1.7652	2.56335	4.11308	6.72195	1.05095	1.63374	2.90822	4.4574	4.51885	1.25726	1.82069	2.49975	2.76407	2.53173
aPF11_0140_0	aPF11_0140_0::PF11_0140::hypothetical protein	1.16004	1.16399	0.887607	0.905584	1.02643	0.759224	1.12975	0.92984	1.15071	1.17743	1.28652	1.10985	0.983506	0.991169	1.03773
aPFC0220w_0	aPFC0220w_0::PFC0220w::hypothetical protein	NA	1.58141	0.978154	0.618183	0.544084	1.09333	1.70888	1.36367	0.872732	0.800723	1.52965	1.60338	1.36286	1.0512	0.634103
aMAL7P1.207_0	aMAL7P1.207_0::MAL7P1.207::	1.57606	2.06735	2.06471	1.50479	1.38336	1.64311	2.44607	2.04621	2.37739	1.67577	1.66922	2.43086	2.27377	3.39906	4.52646
aPFL2430c_0	aPFL2430c_0::PFL2430c::eukaryotic translation initiation factor 2b, subunit 2, putative	1.07627	0.975011	0.739673	0.657497	0.698434	1.17935	1.06238	NA	0.712731	0.694298	1.11769	1.09757	0.887497	0.849764	0.658671
aPF11_0504_0	aPF11_0504_0::PF11_0504::hypothetical protein	0.164706	NA	0.145384	0.178948	NA	0.132147	0.124377	0.146966	NA	NA	NA	0.116632	0.100692	0.145407	0.116993
aPFL0820c_0	aPFL0820c_0::PFL0820c::hypothetical protein	NA	0.441299	0.437427	0.38772	0.3415	0.326628	0.479368	0.561013	0.350709	0.326033	0.550402	0.47635	NA	0.344175	0.400116
aPFA0405w_1	aPFA0405w_1::PFA0405w::hypothetical protein	1.23103	1.31767	1.06615	0.751038	0.746669	1.38381	1.61171	1.48944	1.17334	0.991613	NA	1.78999	1.53497	1.16859	1.13366
aPF14_0045_1	aPF14_0045_1::PF14_0045::hypothetical protein	0.11359	0.107988	0.142833	0.314514	0.688788	0.118434	0.106238	0.13566	0.205254	0.464554	0.102427	0.10681	0.113572	0.189429	0.274934
aPF08_0141_3	aPF08_0141_3::PF08_0141::erythrocyte membrane protein 1 (PfEMP1)	0.0184584	NA	NA	NA	0.00964688	NA	0.0129559	0.0155444	NA	0.0101357	NA	0.0110493	0.0105376	NA	NA
aPFB0010w_0	aPFB0010w_0::PFB0010w::erythrocyte membrane protein 1 (PfEMP1)	0.249898	0.249204	NA	NA	NA	0.180768	0.239684	0.488943	0.15192	NA	NA	0.284828	0.282173	0.197433	0.17432
aPF11_0129_1	aPF11_0129_1::PF11_0129::hypothetical protein	1.09047	1.12972	0.781758	NA	0.538296	0.946225	1.31502	1.16301	NA	NA	1.27639	1.26208	0.951894	0.613645	0.484351
aPF11_0378_0	aPF11_0378_0::PF11_0378::hypothetical protein	0.339351	0.322927	0.424674	0.464993	0.765963	0.392702	0.330375	0.313715	0.408891	0.50003	0.343298	0.348668	0.34774	0.408207	0.559227
aMAL8P1.30_1	aMAL8P1.30_1::MAL8P1.30::hypothetical protein	1.99351	2.12239	1.89127	0.831022	0.918383	2.38239	2.32558	1.68162	1.1798	0.92742	NA	2.53767	2.38852	1.30333	1.16525
aPF13_0286_1	aPF13_0286_1::PF13_0286::methyltransferase, putative	0.312373	0.33331	0.419573	0.4189	0.561449	0.364029	0.366652	0.374479	0.308688	0.400361	0.315159	0.338847	0.369986	0.334836	0.374378
aPF10_0326_1	aPF10_0326_1::PF10_0326::hypothetical protein	1.1004	1.06639	0.943721	0.715791	0.667564	1.27909	1.18417	0.931253	0.772529	0.633483	1.04903	1.13194	0.929648	0.800406	0.446914
aPFF0825c_1	aPFF0825c_1::PFF0825c::mitochondrial import receptor subunit tom40	0.325152	0.2897	0.348156	0.288756	0.289407	0.332862	NA	0.291105	0.263436	0.290558	0.379316	0.341302	0.272806	0.310824	0.387247
aPF14_0326_12	aPF14_0326_12::PF14_0326::hypothetical protein	0.531034	0.563824	0.57771	0.726636	0.92996	0.539809	0.507871	0.563839	0.554346	0.714569	0.460357	0.564744	0.528049	0.50559	0.599005
aPFL0410w_4	aPFL0410w_4::PFL0410w::hypothetical protein	0.379107	0.461027	0.330302	0.512441	0.914525	0.332862	0.513053	0.83516	0.449295	0.797344	0.292647	0.511953	0.525708	0.346843	0.217607
aPFL1620w_0	aPFL1620w_0::PFL1620w::asparagine/aspartate rich protein, putative	0.832048	0.820297	1.00366	0.702234	0.740881	1.03474	1.09348	0.884619	0.783842	0.787209	0.852054	1.03987	1.02097	0.888451	1.15823
aPFL0425c_2	aPFL0425c_2::PFL0425c::hypothetical protein	0.472819	0.608473	0.461658	0.401277	0.513214	0.264295	0.536374	0.57797	0.391113	0.50003	0.360181	0.475122	0.492924	0.430885	0.721847
aPFL1540c_1	aPFL1540c_1::PFL1540c::phenylalanyl-tRNA synthetase alpha chain, putative	1.37302	1.55129	1.08145	0.860847	0.617401	0.902591	1.53657	1.2054	0.842025	0.621658	1.57917	1.6353	1.29963	0.803074	0.349809
aPF07_0009_0	aPF07_0009_0::PF07_0009::chitinase precursor fragment, putative	0.275456	NA	0.374938	0.284689	0.792974	0.189494	NA	0.480464	0.376568	0.799034	NA	0.279917	NA	0.502922	0.435214
aPF14_0228_0	aPF14_0228_0::PF14_0228::hypothetical protein	0.709939	0.701925	0.669531	0.637162	0.640553	0.690657	0.72553	0.58221	0.559195	0.603076	0.664084	0.740306	0.706017	0.764388	0.861069
aPFI1105w_1	aPFI1105w_1::PFI1105w::Phosphoglycerate kinase	0.744016	0.671812	0.646576	0.477194	0.366582	0.897605	0.735895	0.599167	0.415356	0.341236	0.682094	0.691198	0.436724	0.341507	0.359169
aPF07_0081_0	aPF07_0081_0::PF07_0081::hypothetical protein	1.61866	1.80154	NA	0.814754	0.655988	1.98844	2.06646	1.53183	1.25092	0.711191	1.21786	1.94714	1.70123	1.10589	0.565077
aPFF1150w_0	aPFF1150w_0::PFF1150w::ribonuclease H1 large subunit, putative	0.905882	0.821335	1.09803	0.989635	0.760175	0.930018	0.816221	0.689607	0.518791	0.614901	0.789022	0.687515	0.569029	0.620315	0.50424
aClp_0	aClp_0::Clp::	1.70243	1.66759	1.89127	1.6146	1.43353	1.7815	1.2619	0.734828	0.442831	0.322654	1.60056	1.20438	0.728263	0.528268	0.535828
aPFI0180w_1	aPFI0180w_1::PFI0180w::alpha tubulin	2.85537	2.48893	2.19734	1.24179	1.28304	3.07679	2.6741	2.09991	1.65981	1.63016	2.81392	2.65798	1.88505	1.48742	1.08921
aPFF0990c_1	aPFF0990c_1::PFF0990c::hypothetical protein	2.30872	3.10155	3.77998	5.15152	5.68009	2.01961	3.09516	3.91154	5.75195	6.20138	2.31191	2.97718	3.84153	3.67787	3.08862
aPFL1130c_4	aPFL1130c_4::PFL1130c::hypothetical protein	1.04787	1.20552	1.3008	1.01268	0.80648	1.10081	1.39664	1.35237	1.17657	1.00851	0.979243	1.24489	1.20948	0.78173	0.761625
aPF14_0337_0	aPF14_0337_0::PF14_0337::hypothetical protein	1.81318	2.166	2.74444	3.50304	3.96873	2.21035	2.15586	3.25444	4.76447	6.1355	1.7345	2.33878	3.54648	5.29602	4.44223
aPF14_0687_1	aPF14_0687_1::PF14_0687::hypothetical protein	0.512576	0.5036	0.371112	0.319937	0.410957	0.615856	0.47289	0.473399	0.235961	NA	0.768762	0.531596	0.412136	0.313492	0.304182
aPFF0990c_0	aPFF0990c_0::PFF0990c::hypothetical protein	2.19939	2.08501	2.92936	4.32321	5.16301	2.21658	2.41627	3.9073	4.04689	5.80778	2.21174	2.49224	3.12849	3.98469	2.39953
aPFC0780w_2	aPFC0780w_2::PFC0780w::hypothetical protein	0.92008	1.01758	0.936069	0.844579	0.779468	1.03973	0.975579	0.912882	0.867883	0.755112	0.846426	1.15773	1.14274	0.771058	0.693769
atRNA_RNAPhe_0	atRNA_RNAPhe_0::tRNA_RNA-Phe::	NA	0.549287	1.3837	0.714435	0.71194	NA	0.32001	0.654279	NA	0.68923	0.753004	0.249224	0.518683	NA	NA
aPFL0335c_1	aPFL0335c_1::PFL0335c::eukaryotic translation initiation factor 5, putative	0.820689	0.808875	0.902911	0.790352	1.08817	1.00607	0.866749	0.76309	0.769297	0.702744	0.78452	0.842206	0.873447	0.81508	1.11494
aMAL8P1.66_0	aMAL8P1.66_0::MAL8P1.66::hypothetical protein	0.851926	0.787069	1.10823	1.58342	2.87863	0.759224	0.709983	0.953863	1.58061	2.38697	0.613434	0.757494	0.80788	1.02986	0.938285
aPF14_0584_0	aPF14_0584_0::PF14_0584::ribosomal protein S4, putative	0.428803	0.380036	0.367286	0.429745	0.453404	0.423869	0.400337	0.401329	0.326466	0.371644	0.40633	0.386727	0.302077	0.401537	0.596665
aPF10_0328_1	aPF10_0328_1::PF10_0328::hypothetical protein	1.02799	0.869099	0.817466	0.664275	0.586531	1.06092	0.851202	0.764503	0.480002	0.559155	0.876817	0.913413	0.715384	0.769724	0.603684
aPFL2520w_3	aPFL2520w_3::PFL2520w::reticulocyte-binding protein, putative	0.34787	0.501523	1.03427	2.43206	5.20932	0.356548	0.414588	0.862009	1.95557	2.76537	0.260006	0.426014	0.802026	1.54212	1.75373
aPF07_0046_1	aPF07_0046_1::PF07_0046::50S ribosomal protein L1, putative	0.68864	0.680119	0.660604	NA	0.443757	0.996092	NA	0.693847	0.504245	0.363197	NA	0.772226	0.564345	0.356181	NA
aMAL8P1.100_0	aMAL8P1.100_0::MAL8P1.100::hypothetical protein	0.640365	0.626125	0.593014	0.501596	0.576884	NA	0.601153	0.703739	0.392729	0.554087	0.516635	0.577021	0.58425	0.667005	0.582626
aPFE1640w_0	aPFE1640w_0::PFE1640w::erythrocyte membrane protein 1 (PfEMP1), truncated, pseudogene	0.141988	0.127717	0.107125	NA	NA	0.105967	NA	0.216209	NA	NA	NA	NA	NA	NA	NA
aPF14_0692_1	aPF14_0692_1::PF14_0692::hypothetical protein	0.961257	1.01966	1.17072	1.39905	2.06443	0.948718	0.823995	0.837986	0.955157	1.24501	0.83292	0.893769	0.800855	0.859102	1.14185
aPFL0350c_2	aPFL0350c_2::PFL0350c::hypothetical protein	2.25192	2.27814	2.65645	1.99418	1.70943	2.09815	2.45903	2.72028	2.35476	2.21466	2.2804	2.27371	3.03716	2.57331	2.70137
aMAL7P1.162_0	aMAL7P1.162_0::MAL7P1.162::dynein heavy chain, putative	0.912981	1.07262	NA	1.43023	2.16862	0.491189	1.03129	1.18844	1.02788	2.60826	0.818287	0.752583	1.21065	1.70753	2.94355
aPFI0870w_1	aPFI0870w_1::PFI0870w::hypothetical protein	1.00953	0.862869	0.784308	0.677832	0.592319	1.15442	0.950962	0.775808	0.665862	0.608144	1.03102	0.928145	0.662696	0.652331	0.577946
aPFB0550w_0	aPFB0550w_0::PFB0550w::peptide chain release factor subunit 1, putative	0.712778	0.626125	0.689936	0.593781	0.684929	0.70437	0.676297	0.534163	0.483235	0.613212	0.652829	0.645773	0.481216	0.496252	0.555717
aPF14_0166_0	aPF14_0166_0::PF14_0166::lysine -- tRNA ligase, putative	0.900202	0.786031	0.733296	0.532776	0.665635	1.08336	0.847315	0.67265	0.606064	0.663891	NA	0.869215	0.602983	0.844428	0.737057
aPFD1140w_0	aPFD1140w_0::PFD1140w::hypothetical protein	NA	0.0571093	0.141558	0.237241	0.420604	0.068567	0.066075	0.115877	0.237577	NA	NA	0.0613853	0.0971798	0.178757	0.318221
aPF11_0335_0	aPF11_0335_0::PF11_0335::hypothetical protein	2.74178	3.28015	3.51217	3.99107	3.76807	2.92469	3.12626	3.32509	3.7382	4.06443	2.55954	2.90107	3.06175	2.6907	2.08014
aPF11_0465_1	aPF11_0465_1::PF11_0465::dynamin-like protein	2.35558	2.31656	2.91533	2.48222	1.78081	2.6043	2.30097	2.40797	2.99476	2.74003	2.34568	2.35474	2.666	3.00552	3.38227
aMAL13P1.230_1	aMAL13P1.230_1::MAL13P1.230::hypothetical protein	0.594928	0.578361	0.608317	0.595137	1.04572	0.634557	0.63743	NA	0.53172	0.873362	0.592048	0.730485	0.792659	1.03653	1.63322
aPFD1130w_1	aPFD1130w_1::PFD1130w::hypothetical protein	1.08621	1.15153	2.08894	5.24506	7.28533	1.04222	1.21138	1.96708	4.99881	4.94962	0.902705	1.13931	1.68484	3.50311	3.01257
aPF07_0051_2	aPF07_0051_2::PF07_0051::erythrocyte membrane protein 1 (PfEMP1)	0.330831	0.148484	0.23593	0.138278	NA	0.273021	NA	0.349043	NA	0.131765	0.0765386	NA	0.0784463	0.0653665	0.0666861
aPF14_0303_1	aPF14_0303_1::PF14_0303::hypothetical protein	NA	3.37568	2.90513	2.54458	2.22457	NA	4.19641	4.2083	3.86749	3.26708	4.12858	4.02933	NA	4.28084	2.75285
aPF11_0345_0	aPF11_0345_0::PF11_0345::hypothetical protein	0.841987	0.844179	0.837871	1.29737	2.7976	0.473736	0.778649	0.960928	1.16203	1.7197	0.90383	0.730485	0.735288	0.996505	1.71278
aMAL8P1.220_0	aMAL8P1.220_0::MAL8P1.220::	0.569371	NA	0.452731	0.348406	0.46498	0.543549	0.478072	0.780048	0.284446	0.626726	1.15371	0.394093	0.420332	0.452229	0.321731
aPFL1210w_2	aPFL1210w_2::PFL1210w::hypothetical protein	0.570791	0.6417	0.582811	0.539554	0.428322	0.570976	0.672411	0.712218	0.502629	0.452729	0.67534	0.812741	0.61235	0.416211	0.34513
aMAL7P1.228_1	aMAL7P1.228_1::MAL7P1.228::	0.0127789	0.0103835	0.0178542	0.00813398	0.00964688	0.0162067	0.0103647	0.0127182	0.00646468	0.0101357	0.0191346	0.00859394	0.00819589	0.0106721	0.00935945
aPF14_0041_0	aPF14_0041_0::PF14_0041::ribosomal protein L16, putative	1.07059	1.17853	1.18093	1.09267	1.11325	1.25665	1.1466	1.25062	1.0198	1.01695	1.08167	1.2007	1.07834	0.961821	0.975722
aPFB0315w_1	aPFB0315w_1::PFB0315w::41 kDa antigen	1.45537	1.56064	2.28916	3.89076	6.27433	1.43741	1.62337	2.14654	2.84931	3.98165	1.37882	1.58865	2.29251	2.98018	3.642
aPF14_0693_0	aPF14_0693_0::PF14_0693::hypothetical protein	1.31339	1.43915	1.36457	1.55359	2.69534	1.10455	1.2347	NA	0.95354	1.60145	0.778892	NA	0.93316	1.27131	1.18982
aPF14_0063_0	aPF14_0063_0::PF14_0063::ATP-dependent Clp protease, putative	2.7432	2.71632	2.30319	1.49259	1.06695	2.24152	3.26748	2.53939	1.76486	1.28217	3.05817	3.13065	2.36627	1.42472	0.789703
aPFF1130c_0	aPFF1130c_0::PFF1130c::Fe-superoxide dismutase	2.16389	1.9521	1.58775	1.26755	1.09396	1.8351	2.23619	1.89218	1.7293	1.31596	1.96299	2.16076	1.57829	1.31267	1.16291
aPFF0370w_1	aPFF0370w_1::PFF0370w::para-hydroxybenzoate--polyprenyltransf erase (4- hydroxybenzoate octaprenyltransferase), putative	1.56328	1.66655	1.23576	0.748327	0.698434	1.56582	1.71666	1.23508	1.0796	NA	NA	1.86979	1.46941	1.39271	0.995611
aPFL2285c_0	aPFL2285c_0::PFL2285c::hypothetical protein	1.53773	1.56583	2.43072	3.11667	3.67353	1.51969	1.66742	2.65951	4.3879	5.94461	1.55553	1.9987	3.17298	3.8753	2.49663
aMAL8P1.23_3	aMAL8P1.23_3::MAL8P1.23::ubiquitin-protein ligase 1, putative	1.11886	1.1806	1.42961	1.1374	1.30233	1.42121	NA	1.22094	1.21051	1.23318	1.19085	1.31733	1.38979	1.38737	0.996781
aPFC0835c_0	aPFC0835c_0::PFC0835c::hypothetical protein	1.12312	1.29898	1.43471	1.10351	0.879796	1.46733	1.38628	1.38487	1.32364	1.10311	1.08955	1.30505	1.25865	1.1139	0.923076
aPFF0670w_6	aPFF0670w_6::PFF0670w::hypothetical protein	4.06937	4.25931	5.35753	3.93414	2.50819	4.22373	4.75611	5.40381	4.35558	3.51879	4.37283	4.85803	6.4806	3.86463	2.62065
aPFL1575w_0	aPFL1575w_0::PFL1575w::hypothetical protein	3.74564	4.1399	3.91644	4.34084	5.28263	4.06665	4.03706	4.50506	4.7176	4.24687	4.12295	4.18647	4.16936	4.00203	3.2489
aMAL8P1.130_1	aMAL8P1.130_1::MAL8P1.130::hypothetical protein	0.631845	0.62924	0.575159	0.451436	0.410957	0.630817	0.664637	0.512966	0.428285	0.390226	0.720363	0.661733	0.451945	0.441557	0.51711
aMAL13P1.298_0	aMAL13P1.298_0::MAL13P1.298::hypothetical protein	1.54625	1.45992	1.79434	1.65527	1.48369	1.93982	1.81901	1.83424	1.90708	1.8295	1.75026	1.77894	1.9717	1.80492	2.60427
aPFD0692c_0	aPFD0692c_0::PFD0692c::	3.20466	2.7672	1.68977	1.37329	1.038	2.66165	3.01613	3.02268	1.82142	1.71463	2.93773	3.15152	2.13561	1.82359	0.762795
aPFL2460w_0	aPFL2460w_0::PFL2460w::coronin	0.951318	1.23148	2.35675	6.32553	9.59479	0.987365	1.10384	1.83283	5.04083	6.51728	1.00175	1.12703	1.83471	3.95667	3.32143
aPFL0745c_1	aPFL0745c_1::PFL0745c::hypothetical protein	2.96328	2.90946	3.02501	2.64761	1.81169	3.22016	2.92026	3.49043	3.58143	2.92923	2.93998	3.22395	3.80758	4.64102	2.86984
aPF14_0051_2	aPF14_0051_2::PF14_0051::hypothetical protein, conserved	0.418864	0.515022	0.434877	0.414833	0.430251	0.691904	0.570059	0.497422	0.381416	0.375022	0.41646	0.619991	0.547954	0.377525	0.444574
aPF11_0144_0	aPF11_0144_0::PF11_0144::hypothetical protein	0.629005	0.648969	0.654228	0.654786	0.922242	0.604636	0.682775	0.55536	0.525255	0.557465	0.696726	0.708386	0.64045	0.584296	0.754605
aPF13_0101_0	aPF13_0101_0::PF13_0101::hypothetical protein	0.81359	1.03835	0.896535	0.839156	0.821915	1.04721	1.13105	1.01887	0.884045	0.809169	0.957858	0.864304	1.11464	1.03786	1.25885
aPF13_0170_1	aPF13_0170_1::PF13_0170::glutaminyl-tRNA synthetase, putative	0.715618	0.658314	0.794511	0.630384	0.490062	0.824051	0.691844	0.65004	0.627074	0.614901	0.721488	0.68997	0.674404	0.763054	0.928925
aPFE0570w_2	aPFE0570w_2::PFE0570w::hypothetical protein	0.759634	0.891943	0.990907	0.770017	0.937677	0.891371	0.884887	0.80831	0.866267	0.917284	0.895951	0.961293	1.11347	0.896455	0.934775
aPF14_0409_0	aPF14_0409_0::PF14_0409::hypothetical protein	2.40953	2.19923	2.19734	1.89929	1.25602	2.96708	2.53288	2.35145	2.50345	1.84808	2.23763	2.27985	2.52199	3.06956	2.76338
aPFD0965w_2	aPFD0965w_2::PFD0965w::hypothetical protein	1.72799	1.88772	2.4728	2.08366	1.48948	1.69922	1.86306	2.13807	2.30466	2.1606	1.78515	1.92381	2.65664	2.20378	1.68821
aPFL0355c_0	aPFL0355c_0::PFL0355c::hypothetical protein	0.596348	0.597051	0.659329	0.944898	1.18464	0.605883	NA	0.686781	0.745054	1.0406	0.514384	0.574566	0.642792	0.843094	0.785024
aPFC0940c_0	aPFC0940c_0::PFC0940c::hypothetical protein	1.8998	2.30721	1.95631	2.38868	2.59694	1.25291	NA	1.9049	3.0481	3.9901	2.01702	2.21601	2.25738	3.4084	3.90757
aMAL8P1.152_1	aMAL8P1.152_1::MAL8P1.152::hypothetical protein	0.558012	0.512945	0.681009	0.68461	NA	0.537316	0.583015	0.558186	0.564043	0.773694	0.504254	0.595437	0.614691	0.829754	1.09155
aPFA0220w_1	aPFA0220w_1::PFA0220w::ubiquitin carboxyl-terminal hydrolase, putative	0.513995	0.538904	0.90036	2.16635	4.71347	0.522356	0.5286	0.661345	1.26708	2.67752	0.487371	0.552467	0.677917	0.873777	1.0623
aPF07_0005_0	aPF07_0005_0::PF07_0005::lysophospholipases-like protein, putative	0.154767	0.177558	0.359634	1.17943	3.26451	0.152094	0.15288	0.274147	0.788691	2.04742	0.130566	0.157146	0.258756	0.672341	0.815442
aPF14_0549_1	aPF14_0549_1::PF14_0549::hypothetical protein	1.13874	1.08923	1.19368	1.15638	1.04572	NA	0.940598	1.12061	1.39314	1.24163	0.997252	1.09389	1.01161	1.59014	1.04943
aPFL0135w_1	aPFL0135w_1::PFL0135w::hypothetical protein	1.36024	1.46615	1.51505	1.69051	1.74416	1.65184	1.72572	1.62369	1.61455	2.23831	1.48575	1.60093	1.60288	1.34468	1.22492
aPFD0540c_0	aPFD0540c_0::PFD0540c::hypothetical protein	0.667342	0.600166	0.687386	0.524642	0.520932	0.733044	0.690549	0.671237	0.49778	0.488205	0.543649	0.664188	0.617033	0.641659	0.600175
aPF08_0107_2	aPF08_0107_2::PF08_0107::erythrocyte membrane protein 1 (PfEMP1)	0.149087	0.105912	0.191295	NA	NA	0.105967	0.0868045	0.180881	0.066263	NA	NA	NA	0.073763	0.109389	0.102954
aMAL13P1.326_0	aMAL13P1.326_0::MAL13P1.326::ferrochelatase, putative	0.417444	NA	0.218076	NA	0.380087	0.427609	0.310941	0.375893	0.169698	NA	0.514384	0.432152	0.270464	0.281476	0.156771
aPFB0145c_2	aPFB0145c_2::PFB0145c::hypothetical protein	1.85862	1.93237	2.33635	4.16596	5.36753	2.05327	1.91488	2.79941	3.40689	3.20458	1.65796	2.32773	3.00672	3.4204	2.96461
aPF08_0142_2	aPF08_0142_2::PF08_0142::erythrocyte membrane protein 1 (PfEMP1)	0.847667	0.979164	1.2804	1.22281	1.47404	0.895111	0.844724	1.00332	1.62263	1.05412	0.949979	0.778365	1.04556	1.09522	1.6145
aPFC0425w_5	aPFC0425w_5::PFC0425w::hypothetical protein	0.525354	0.565901	0.757527	0.889316	1.40845	0.688163	0.615405	0.651453	0.570508	0.748355	0.491873	0.579477	0.542099	0.414877	0.410646
aPFD0865c_1	aPFD0865c_1::PFD0865c::cdc2-related protein kinase 1	0.955577	1.2076	0.952648	0.68461	0.534437	0.941238	1.13882	1.02452	0.610912	0.663891	1.27189	1.19578	1.16265	0.76839	0.387247
aPFE1060c_2	aPFE1060c_2::PFE1060c::hypothetical protein	0.856186	0.83691	0.610868	0.492106	0.590389	0.772937	0.943189	0.849291	0.437982	0.56929	1.02877	NA	0.785634	0.481578	0.34045
aMAL13P1.321_0	aMAL13P1.321_0::MAL13P1.321::hypothetical protein	1.92535	1.74962	1.48827	1.43972	1.15377	2.0807	2.01723	2.00523	2.05738	1.70618	1.62419	2.0294	1.98106	2.22113	2.00526
aPF11_0326_4	aPF11_0326_4::PF11_0326::hypothetical protein	0.265517	0.250242	0.261436	0.249442	0.245031	NA	0.237093	0.339151	0.124445	0.255083	0.245374	0.254135	0.217776	0.168085	NA
aMAL13P1.1_0	aMAL13P1.1_0::MAL13P1.1::	NA	NA	0.45018	0.371452	0.409028	0.499916	0.663342	0.479051	0.268284	0.391915	0.660708	0.332708	0.362961	0.330834	0.178999
aPFE0295w_0	aPFE0295w_0::PFE0295w::hypothetical protein	0.948478	0.756957	0.868478	0.706301	0.509356	0.827791	0.820108	0.696673	0.675559	0.479758	0.865561	0.817652	0.6264	0.476242	0.520619
aPF14_0487_1	aPF14_0487_1::PF14_0487::hypothetical protein	0.567951	0.619895	0.710341	0.608693	0.777539	0.74177	0.668524	0.67265	0.591518	0.613212	0.538021	0.604031	0.653329	0.739042	0.785024
aMAL13P1.224_0	aMAL13P1.224_0::MAL13P1.224::hypothetical protein	0.849086	0.922055	0.979429	1.01133	1.13254	0.974898	0.852498	0.832334	0.743438	0.883498	0.620187	0.869215	0.852372	0.660335	0.627083
aPF10_0341_0	aPF10_0341_0::PF10_0341::hypothetical protein, conserved	0.651724	0.70504	0.462933	0.305024	0.335712	0.691904	0.529896	0.425352	0.452528	0.464554	NA	0.552467	0.402769	0.504256	1.63205
achr12tRNAPro1_0	achr12tRNAPro1_0::chr12-tRNA-Pro-1::(tRNA) tRNA-Pro	0.898782	0.775647	0.538176	0.566668	0.679141	0.609623	0.698322	0.617538	0.408891	0.616591	0.710233	0.450568	0.385207	0.638991	0.951154
aPF11_0374_0	aPF11_0374_0::PF11_0374::hypothetical protein	1.09189	1.27094	1.22684	0.786285	0.621259	1.33768	1.29559	1.15311	0.913136	0.677405	1.15033	1.19947	1.12167	0.893787	1.29745
aMAL7P1.16_1	aMAL7P1.16_1::MAL7P1.16::hypothetical protein	0.744016	0.71127	0.589188	0.542266	0.546014	0.790391	0.747555	0.661345	0.457376	0.478069	0.540272	0.844661	0.61235	0.776394	1.04475
aPFL1035w_1	aPFL1035w_1::PFL1035w::hypothetical protein	0.428803	0.506715	0.517771	0.326715	0.327994	0.453789	0.474186	0.4197	0.328083	0.283801	0.452478	0.484943	0.382865	0.317494	0.412986
aMAL7P1.89_7	aMAL7P1.89_7::MAL7P1.89::hypothetical protein	NA	0.926208	0.650402	0.904228	1.6419	0.766704	0.886183	1.1404	0.614145	NA	0.533519	0.885175	0.850031	0.917799	0.597835
aPF11_0357_0	aPF11_0357_0::PF11_0357::hypothetical protein	0.942798	1.01654	0.888883	1.10622	1.48562	1.20429	1.09348	1.31986	1.16849	1.90214	NA	1.21543	1.40501	2.08372	NA
aPFL1455w_0	aPFL1455w_0::PFL1455w::hypothetical protein	0.22576	0.227399	0.160688	0.173525	0.266254	0.193234	0.277256	0.349043	0.143839	0.280422	0.196974	0.369539	0.33369	0.217444	0.216437
aPFB0500c_0	aPFB0500c_0::PFB0500c::rab5 protein, putative	2.3428	2.0279	NA	NA	0.870149	2.30635	2.16493	2.22427	NA	1.10142	NA	2.00853	2.02321	1.58214	NA
aMAL13P1.26_5	aMAL13P1.26_5::MAL13P1.26::hypothetical protein	0.553752	0.673889	0.678459	0.534132	0.582672	0.724317	0.66982	0.662758	0.512326	0.464554	0.59655	0.686287	0.587762	0.476242	0.387247
aMALP1.29a_0	aMALP1.29a_0::MALP1.29::	2.41947	2.15146	2.06343	1.35295	1.19428	2.08942	2.15327	2.41787	2.05577	1.15041	2.15096	1.84033	1.89559	1.17793	0.588475
aPFL0380c_0	aPFL0380c_0::PFL0380c::tRNA delta(2)-isopentenylpyrophosphate transferase, putative	0.374848	0.336425	0.373662	0.334849	0.364652	0.334108	0.37313	0.368827	0.268284	NA	0.326414	0.322886	0.284514	0.245458	0.218777
aPFA0480w_0	aPFA0480w_0::PFA0480w::phenylalanyl-tRNA synthetase beta chain, putative	0.853346	0.74242	0.772831	0.530065	0.52672	0.967418	0.765693	0.66841	0.564043	0.50003	0.81491	0.628585	0.742313	0.772392	0.719508
aPF11_0142_0	aPF11_0142_0::PF11_0142::hypothetical protein, conserved	1.67404	1.2969	1.54949	1.57664	2.13968	1.59699	1.42644	1.32976	1.49819	1.92748	1.497	1.39467	1.06312	1.10589	0.975722
aMAL13P1.298_2	aMAL13P1.298_2::MAL13P1.298::hypothetical protein	1.37444	1.60114	1.54439	1.41938	1.27532	1.67802	1.70888	1.76076	1.73415	1.69605	1.4486	1.70528	1.71997	1.32067	2.14214
aPFL0775w_0	aPFL0775w_0::PFL0775w::hypothetical protein	1.35172	1.00408	1.17072	0.934053	0.800691	1.61444	1.53009	1.27323	1.04243	0.842955	NA	1.52358	1.26217	0.947147	1.00263
aPF07_0067_1	aPF07_0067_1::PF07_0067::hypothetical protein	0.239959	0.294891	0.392792	0.338916	0.491991	0.329122	0.305759	0.341977	0.24889	0.315897	0.226239	0.284828	0.286856	0.248126	0.280783
aPFB0905c_0	aPFB0905c_0::PFB0905c::hypothetical protein	2.38823	2.61457	2.83499	3.26579	2.99053	2.34749	2.87232	3.46641	4.75962	4.72494	2.67885	2.77707	3.59799	4.58499	3.14477
aPFD0660w_0	aPFD0660w_0::PFD0660w::hypothetical protein	2.39391	2.3664	2.34527	1.91284	1.33513	2.72897	2.6443	2.68919	2.32728	1.90721	2.22412	2.45664	2.53136	2.26515	0.67271
aPF10_0350_1	aPF10_0350_1::PF10_0350::hypothetical protein	0.536713	0.44026	0.526698	0.483972	0.547943	0.548536	0.488437	0.435244	0.399194	0.562533	0.469361	0.510725	0.410965	0.584296	1.38637
aPF10_0058_1	aPF10_0058_1::PF10_0058::hypothetical protein	0.655983	0.570054	0.641475	0.629028	0.615471	0.604636	NA	0.568078	0.533336	0.535505	0.567286	0.602803	0.583079	0.556282	0.691429
aMAL8P1.126_1	aMAL8P1.126_1::MAL8P1.126::serine protease, putative	1.59878	1.89707	2.67175	2.6937	2.69534	1.12325	1.71536	2.21296	2.66668	3.44446	1.39683	1.4315	2.7105	4.21147	7.78004
aPF14_0304_1	aPF14_0304_1::PF14_0304::hypothetical protein	2.03752	2.40586	1.6005	2.61779	6.1605	1.9498	NA	2.5182	2.76365	2.93429	1.76601	2.31422	2.68942	2.99752	1.72916
aPFE0570w_14	aPFE0570w_14::PFE0570w::hypothetical protein	1.08337	1.23148	1.36967	1.12113	0.976265	1.29903	1.20101	1.10083	1.04243	0.929109	1.08955	1.30873	1.39213	1.10056	0.620063
aPF13_0214_1	aPF13_0214_1::PF13_0214::elongation factor 1-gamma, putative	0.738336	0.634432	0.576435	0.345694	0.335712	0.942485	0.694436	0.541229	0.415356	0.326033	0.891449	0.675238	0.409794	0.318828	0.362679
aPF11_0240_2	aPF11_0240_2::PF11_0240::dynein heavy chain, putative	0.823529	0.569016	0.706515	0.441946	0.46305	0.567236	0.431431	0.825268	NA	0.596319	0.964611	NA	0.491753	0.500254	0.735887
aPFA0675w_0	aPFA0675w_0::PFA0675w::P. falciparum RESA-like protein with DnaJ domain	1.97363	2.26776	2.10297	1.56986	4.53018	2.41605	2.53029	2.71745	2.37092	4.36512	NA	2.53767	2.61332	2.57731	2.1632
aPFC0120w_0	aPFC0120w_0::PFC0120w::Cytoadherence linked asexual protein, CLAG	3.43468	3.55635	5.41364	5.57178	6.09104	3.06058	3.60174	4.45984	6.51317	7.2859	3.52865	3.65488	4.13658	4.601	3.70517
aMAL13P1.351_2	aMAL13P1.351_2::MAL13P1.351::hypothetical protein	1.04787	0.981241	0.780482	0.615471	0.870149	0.992352	1.06627	1.05278	0.861419	0.795655	1.07942	1.19947	1.17318	0.992503	0.84235
aPFL0390c_1	aPFL0390c_1::PFL0390c::hypothetical protein	0.705679	0.642739	0.845523	0.736126	0.767892	0.680683	0.663342	0.884619	NA	0.726394	0.570663	0.58316	0.632254	0.693685	0.699619
aMAL13P1.132_0	aMAL13P1.132_0::MAL13P1.132::microfibril-associated protein homologue, putative	1.03935	0.936592	0.937344	1.15367	0.860502	1.11702	1.01574	1.02311	0.809701	0.731462	0.849803	0.937967	0.809051	0.864438	0.902017
aPF14_0394_0	aPF14_0394_0::PF14_0394::hypothetical protein	1.65132	1.59698	1.73568	1.12656	0.964688	1.76778	1.71018	1.56575	1.419	0.947691	1.51389	1.4401	1.55136	1.32067	0.971043
aPFE0440w_2	aPFE0440w_2::PFE0440w::hypothetical protein	2.37261	3.03406	3.36296	2.25311	2.01234	3.23013	3.21436	3.74056	3.13214	3.51372	2.95236	3.09873	4.02301	4.08074	3.86896
aPFA0220w_0	aPFA0220w_0::PFA0220w::ubiquitin carboxyl-terminal hydrolase, putative	0.491277	0.553441	0.848073	2.25718	4.95464	0.537316	0.544147	0.655692	1.33334	2.91909	0.526765	0.61508	0.717726	0.924469	1.12664
aPF11_0395_5	aPF11_0395_5::PF11_0395::guanylyl cyclase	3.32819	3.39021	4.0631	3.38103	2.38471	3.73628	3.97746	4.35244	4.50103	3.42081	3.45662	4.24295	5.19853	4.47027	3.12255
aPFI0335w_0	aPFI0335w_0::PFI0335w::hypothetical protein	0.472819	0.401841	0.438703	0.447369	0.360794	0.509889	0.42884	0.384371	0.339396	0.331101	0.84305	0.396549	0.351252	0.326832	0.319391
aPF11_0353_0	aPF11_0353_0::PF11_0353::hypothetical protein	NA	0.404956	0.424674	NA	0.437969	0.465009	0.453456	0.418286	0.352325	0.434147	0.41646	0.403915	0.388719	0.462901	0.459783
aPFE1630w_0	aPFE1630w_0::PFE1630w::rifin	0.190264	NA	0.161963	NA	NA	NA	0.155471	0.409808	NA	NA	NA	0.14978	0.23651	NA	NA
aPF14_0221_0	aPF14_0221_0::PF14_0221::hypothetical protein, conserved	0.819269	0.646892	0.730746	0.79713	0.688788	0.764211	0.638725	0.66841	0.854954	1.00513	0.65508	0.622446	0.694309	1.01918	1.02369
aPF10_0308_1	aPF10_0308_1::PF10_0308::hypothetical protein	3.71724	NA	5.70823	8.35631	9.31696	3.95819	3.96709	5.95634	8.71116	10.0259	3.96762	4.22208	5.83079	8.26152	7.7894
aPFF0715c_0	aPFF0715c_0::PFF0715c::endonuclease iii homologue, putative	0.820689	0.767341	0.842972	0.962521	0.764033	0.887631	0.804561	0.792766	0.830711	0.772005	0.719237	0.806602	0.826614	0.977829	0.664521
aPFD0665c_0	aPFD0665c_0::PFD0665c::26s proteasome aaa-ATPase subunit Rpt3	1.97647	1.58764	1.63493	1.36651	1.04186	2.08693	1.78143	1.80881	1.76647	1.5305	1.77614	1.68687	1.56307	1.53545	1.10207
aPF13_0097_1	aPF13_0097_1::PF13_0097::hypothetical protein	0.785192	0.851447	0.952648	0.894738	0.827703	0.886385	0.759215	0.775808	0.851722	0.866605	0.791274	0.861849	1.02214	1.18327	1.18748
aPF14_0491_1	aPF14_0491_1::PF14_0491::hypothetical protein	0.682961	1.01654	0.914389	1.5197	2.03163	0.408909	NA	1.5926	NA	2.39879	NA	0.934283	1.60522	3.79259	8.00584
aPF14_0095_0	aPF14_0095_0::PF14_0095::hypothetical protein	0.624746	0.624048	0.571334	NA	0.439898	0.489942	0.636134	0.682542	0.370103	0.533815	0.59655	0.703475	0.475361	0.486914	0.430535
aPF14_0538_2	aPF14_0538_2::PF14_0538::hypothetical protein	1.41988	1.45888	1.49592	0.985568	0.829632	2.18542	1.66872	1.71271	1.33819	1.02202	1.53302	1.70037	1.83822	1.35802	1.02486
aPFC1095w_0	aPFC1095w_0::PFC1095w::rifin (3D7-rifT3-5)	0.354969	0.312543	0.206598	NA	NA	NA	0.225432	0.440897	NA	NA	NA	0.178017	NA	NA	NA
aPF10_0090_0	aPF10_0090_0::PF10_0090::hypothetical protein	1.39006	NA	0.916939	NA	0.752457	0.642037	1.47438	1.28454	1.0198	NA	1.44073	1.666	1.542	1.37937	1.56537
aPFL0635c_1	aPFL0635c_1::PFL0635c::bromodomain protein, putative	0.664502	0.659352	0.786859	0.871692	NA	0.64453	0.783831	0.743306	0.840408	1.07101	0.724865	0.68997	0.855885	0.981831	0.872769
aPF10_0364_0	aPF10_0364_0::PF10_0364::hypothetical protein	NA	0.461027	NA	0.677832	0.717728	0.425115	0.562286	0.959515	0.412123	0.90208	NA	0.671555	0.734117	0.577626	0.423515
aMAL13P1.193_1	aMAL13P1.193_1::MAL13P1.193::hypothetical protein	1.08337	0.990586	1.08655	0.867625	0.875937	1.19805	1.11032	1.04713	0.938995	0.915595	0.915086	0.876581	0.927306	0.865772	0.985082
aPFB0655c_1	aPFB0655c_1::PFB0655c::hypothetical protein	0.327992	0.311505	0.317549	0.371452	0.484274	0.354055	0.304463	0.282626	0.316769	0.435837	0.255504	0.329025	0.331348	0.404205	0.462123
aPF13_0071_1	aPF13_0071_1::PF13_0071::hypothetical protein	0.474239	0.445452	0.420848	0.338916	0.3087	0.553523	0.487141	0.432418	0.365254	0.297315	0.52564	0.54019	0.386378	0.368187	0.383737
aPF08_0036_1	aPF08_0036_1::PF08_0036::protein transport protein	1.21683	1.20241	1.51378	1.50072	1.35828	1.41996	1.27356	1.40889	1.58223	1.80078	1.37544	1.33697	1.49868	1.96099	1.81105
aPF10_0181_1	aPF10_0181_1::PF10_0181::hypothetical protein	0.559432	0.569016	0.725645	0.80662	1.08431	0.456282	0.39645	0.479051	0.486467	0.704434	NA	0.44934	0.532733	1.31934	3.42907
aORF78_0	aORF78_0::ORF78::	1.00527	0.615742	0.530524	0.641229	0.617401	0.55851	0.303168	0.268495	0.218183	0.19089	0.945476	NA	0.238852	0.28948	0.156771
aPF10_0177_3	aPF10_0177_3::PF10_0177::erythrocyte membrane-associated antigen	2.70345	3.09013	3.62057	3.12074	2.38085	2.25772	3.39315	4.30439	4.92932	4.77055	2.98838	3.68925	4.76532	4.53563	4.17665
aMAL7P1.55_3	aMAL7P1.55_3::MAL7P1.55::erythrocyte membrane protein 1 (PfEMP1)	0.0425963	0.0342655	0.0701414	0.0393143	0.0405169	0.0386469	0.0349809	0.0395676	0.0290911	0.0337858	0.0540272	0.0257818	0.0362961	0.0253462	0.033928
aPF14_0711_1	aPF14_0711_1::PF14_0711::hypothetical protein, conserved	0.773833	0.808875	0.68611	0.610049	0.698434	0.70811	0.750146	0.811137	0.585054	0.729773	0.678717	0.774682	0.845347	0.669673	0.561567
aMAL13P1.296_3	aMAL13P1.296_3::MAL13P1.296::hypothetical protein	NA	1.96352	2.13485	2.76827	3.11594	2.13804	2.40591	3.10041	3.27921	2.78733	2.32992	2.27494	2.899	3.18295	2.17022
aPF13_0252_1	aPF13_0252_1::PF13_0252::nucleoside transporter 1	0.786612	0.702963	0.617244	0.374163	0.385875	0.835271	0.833064	0.55536	0.368487	0.344615	0.809283	0.698564	0.526878	0.356181	0.265574
aPFL1390w_1	aPFL1390w_1::PFL1390w::hypothetical protein	2.3357	2.22934	1.63748	0.99099	1.01292	2.93841	2.44219	2.33025	1.3592	1.78727	1.37657	2.79426	2.31241	2.00769	1.51389
aPFA0375c_1	aPFA0375c_1::PFA0375c::patched family protein, putative	0.454361	0.470373	0.598115	1.32584	3.44201	0.491189	0.524714	0.575144	0.964853	2.43089	0.471613	0.5672	0.538587	0.777728	0.880958
aPFI1500w_4	aPFI1500w_4::PFI1500w::hypothetical protein	1.70385	1.81088	1.83005	1.55224	1.28497	1.76404	1.84751	2.08719	1.74708	1.34974	1.77614	1.94591	2.03492	1.35135	0.831821
aPFC0950c_1	aPFC0950c_1::PFC0950c::peptidase, putative	1.19412	0.994739	1.05722	0.675121	0.499709	1.0497	1.16862	1.07398	0.816166	0.726394	1.07717	1.22525	1.12986	0.703023	0.723017
aPFI0260c_5	aPFI0260c_5::PFI0260c::hypothetical protein	0.403245	0.448567	0.413197	0.412122	0.667564	0.669463	0.610222	0.805484	0.373335	0.660512	NA	0.73294	0.727092	1.56613	3.06405
aPFB0880w_0	aPFB0880w_0::PFB0880w::hypothetical protein, conserved	0.533874	0.479718	0.441253	0.402632	0.505497	0.476229	0.441796	0.414047	NA	0.413876	0.495249	0.502131	0.464824	0.513594	0.787364
aPFI0295c_2	aPFI0295c_2::PFI0295c::hypothetical protein	0.731237	0.725807	0.734572	0.573446	0.565307	0.867684	0.73719	0.617538	0.449295	0.503408	0.868938	0.82379	0.652158	0.510926	0.85288
aMAL8P1.25a_0	aMAL8P1.25a_0::MAL8P1.25::hypothetical protein	0.900202	0.938668	0.872304	0.660208	0.692646	0.982378	0.954849	0.683955	0.654549	0.701055	0.945476	0.904819	0.650988	0.721699	0.809592
aPFF0835w_0	aPFF0835w_0::PFF0835w::hypothetical protein	1.10466	1.36232	1.10568	0.885249	0.673353	1.42993	1.40571	1.20823	1.09738	0.85478	1.12669	1.18474	0.994044	0.86177	0.918396
aPFC1016w_0	aPFC1016w_0::PFC1016w::hypothetical protein	0.411764	0.336425	0.318825	NA	0.582672	0.311668	0.382199	0.576557	NA	0.368265	NA	0.41742	0.396915	NA	0.141562
aPF14_0614_2	aPF14_0614_2::PF14_0614::hypothetical protein	0.562271	0.666621	1.17455	2.38732	4.87361	0.638297	0.647795	0.941145	1.77779	2.84983	0.549277	0.634724	0.82193	1.13257	1.12196
aPF10_0208_0	aPF10_0208_0::PF10_0208::hypothetical protein, conserved	1.15294	1.26367	1.36457	0.799842	0.702293	1.34017	1.36555	1.19551	0.864651	0.646998	1.38895	1.36889	1.09708	0.760386	0.636442
aPFL0050c_0	aPFL0050c_0::PFL0050c::hypothetical protein	0.34219	0.350962	0.270363	0.238597	0.275901	0.406415	0.3524	0.285452	0.2699	0.256772	0.318535	0.311837	0.22246	0.205438	0.194209
aPF13_0033_0	aPF13_0033_0::PF13_0033::26S proteasome regulatory subunit, putative	1.8501	1.6624	1.83515	1.49801	1.09203	1.966	2.07294	1.97273	1.8586	1.44603	1.95286	2.08342	1.86866	1.59681	1.19684
aPF14_0419_1	aPF14_0419_1::PF14_0419::hypothetical protein	1.74787	2.17119	1.77266	1.73932	2.26895	1.06715	1.88638	1.90631	1.79072	2.76706	2.08793	2.08833	1.93306	1.8983	1.30096
aPF11_0342_1	aPF11_0342_1::PF11_0342::hypothetical protein	1.47383	1.64163	1.81092	1.376	1.01099	2.12184	1.94209	1.9261	1.60001	1.40042	1.6422	1.87102	2.03726	1.75156	1.75841
aPFD0945c_1	aPFD0945c_1::PFD0945c::hypothetical protein	1.29919	1.30001	0.728195	0.813398	0.783327	1.43118	1.10902	1.18986	1.09091	1.26359	1.37657	1.40204	1.3734	1.46207	1.09155
aPF11_0079_2	aPF11_0079_2::PF11_0079::hypothetical protein	NA	1.0425	1.15797	0.859491	0.9589	1.00731	1.06886	1.04996	0.858186	0.866605	1.1357	1.21788	1.24812	0.667005	0.50541
aPF14_0417_0	aPF14_0417_0::PF14_0417::heat shock protein, putative	1.50649	1.31351	1.34671	0.850001	0.698434	1.42744	1.56507	1.36084	0.971318	0.785519	1.18072	1.48307	1.03268	0.913797	0.655161
aPFD0430c_0	aPFD0430c_0::PFD0430c::hypothetical protein	NA	0.28347	0.339229	NA	0.436039	NA	0.243571	0.421113	0.214951	NA	NA	0.255363	0.381694	0.340173	0.740566
aPF10_0402_0	aPF10_0402_0::PF10_0402::rifin	0.276876	NA	NA	NA	NA	0.195728	NA	0.520032	NA	NA	NA	NA	NA	0.166751	NA
aPF08_0022_0	aPF08_0022_0::PF08_0022::hypothetical protein, conserved in P. falciparum	1.49229	1.21279	1.1873	0.917785	0.982053	0.979885	1.6441	1.70423	1.26061	1.04905	NA	1.91399	1.77148	1.2433	0.949984
aPF13_0187_0	aPF13_0187_0::PF13_0187::hypothetical protein	1.71805	1.90849	1.46532	1.02353	0.781398	1.69049	1.95634	1.76217	1.21374	1.1673	1.72775	1.88944	1.76094	1.71153	2.94472
aPFE0325w_1	aPFE0325w_1::PFE0325w::hypothetical protein	0.630425	0.710231	1.12099	0.868981	NA	0.847738	0.86934	0.791353	0.751519	0.876741	0.711358	0.92569	0.98819	0.86177	1.75022
aPFE0110w_0	aPFE0110w_0::PFE0110w::hypothetical protein	1.34888	1.29482	1.30846	1.13198	0.80648	1.62815	1.50936	1.39617	1.27839	1.05412	1.38895	1.44255	1.32539	1.31667	0.917226
aMAL7P1.147_2	aMAL7P1.147_2::MAL7P1.147::ubiquitin carboxyl-terminal hydrolase, putative	1.57038	1.65409	1.93208	1.376	1.20972	1.94232	1.85528	1.76359	1.37374	1.27541	1.88758	1.95451	1.88154	1.40338	1.33723
aPF11_0201_3	aPF11_0201_3::PF11_0201::hypothetical protein	1.26227	1.29898	1.54056	1.28924	0.987841	1.53715	1.5858	1.43574	1.34627	1.18419	1.34618	1.45483	1.41672	1.18193	1.44954
aPFC0370w_1	aPFC0370w_1::PFC0370w::hypothetical protein	2.30304	2.43908	3.58869	5.98932	5.25562	2.67162	2.44996	3.23042	6.83802	6.63891	NA	2.85073	3.60502	5.11059	4.28663
aMAL13P1.35_0	aMAL13P1.35_0::MAL13P1.35::u1 small nuclear ribonucleoprotein a, putative	1.05639	1.14426	1.11334	1.04793	0.978194	1.0497	1.13364	1.2054	1.18304	1.15885	1.32367	1.10371	1.30666	1.1926	1.29979
atRNA_RNAAla_0	atRNA_RNAAla_0::tRNA_RNA-Al::	1.54341	1.14426	1.45256	1.13198	0.852785	1.47606	1.37073	1.43998	1.51274	1.3413	1.31354	1.42537	1.51975	1.26864	1.27055
aPFF0575c_0	aPFF0575c_0::PFF0575c::hypothetical protein	1.6357	2.11512	2.1425	2.66252	3.33396	1.27909	1.95893	2.54081	2.69254	3.29242	1.8887	2.39894	2.53136	3.938	5.29745
aPF14_0646_0	aPF14_0646_0::PF14_0646::hypothetical protein	1.26369	1.29482	1.1873	0.843223	0.694576	1.14943	1.14012	1.10507	0.866267	0.694298	1.10306	1.16632	0.943698	0.961821	0.948814
aPFB0755w_1	aPFB0755w_1::PFB0755w::hypothetical protein	2.19371	2.38924	NA	NA	1.27918	1.2367	2.27765	2.61853	1.11516	1.55415	2.74863	2.52048	2.8147	2.00902	NA
aPFI0785c_1	aPFI0785c_1::PFI0785c::transporter, putative	2.33144	2.68621	3.12193	4.26763	3.87419	2.70902	2.57952	3.26292	4.7079	4.96144	2.49426	2.78198	3.11561	4.39289	3.48171
aMAL8P1.16_0	aMAL8P1.16_0::MAL8P1.16::hypothetical protein	0.516835	0.580438	0.487164	0.383653	0.422534	0.432596	0.667228	NA	NA	NA	NA	0.688742	NA	0.622983	0.823631
aPF14_0698_0	aPF14_0698_0::PF14_0698::hypothetical protein	0.327992	0.354077	NA	0.45008	0.33957	0.365275	0.478072	0.630256	0.353941	0.432458	0.321912	0.440746	0.380523	NA	0.816612
aMAL13P1.351_1	aMAL13P1.351_1::MAL13P1.351::hypothetical protein	1.07059	1.18372	0.913113	0.788996	0.993629	0.766704	1.1155	1.17855	0.993945	1.04229	1.03665	1.25717	1.25163	1.04453	0.67622
aPF13_0155_2	aPF13_0155_2::PF13_0155::hypothetical protein	2.38255	2.4775	2.68833	2.26938	1.73837	2.87732	2.9384	3.53	2.63112	2.11837	2.41322	2.82249	2.70933	2.3612	2.809
aPF07_0111_1	aPF07_0111_1::PF07_0111::hypothetical protein	1.11176	1.06119	1.03044	0.89745	0.708081	0.893865	1.19065	1.11355	0.843641	0.746666	1.17622	1.19824	1.23172	0.728369	0.628253
aPFL0150w_1	aPFL0150w_1::PFL0150w::origin recognition complex 1 protein	1.4213	1.46407	1.48572	1.08046	0.904878	1.50349	1.87731	1.49792	1.17657	1.25514	1.73562	1.84647	1.69187	NA	2.06961
aPFB0265c_2	aPFB0265c_2::PFB0265c::DNA repair endonuclease, putative	1.1714	1.16711	1.44109	1.51157	2.01041	1.3302	1.29688	1.33823	1.31071	1.72645	1.19648	1.2007	1.33008	1.14858	1.24247
aPF07_0033_0	aPF07_0033_0::PF07_0033::Cg4	0.543813	0.575246	0.475686	0.352473	0.457262	0.71933	0.6167	0.457854	0.408891	0.461176	0.578541	0.547556	0.503462	0.445559	0.497221
aPF14_0760_0	aPF14_0760_0::PF14_0760::hypothetical protein	0.646044	0.520213	0.68356	0.95032	2.09337	0.647023	0.546739	0.730588	0.848489	1.41225	0.273513	0.577021	0.752851	1.01918	0.801403
aPFE0410w_0	aPFE0410w_0::PFE0410w::triose or hexose phosphate / phosphate translocator, putative	1.20122	1.04147	0.772831	0.525998	0.430251	1.19805	1.16862	0.764503	0.625458	0.49834	1.39345	1.17491	0.803197	0.659001	0.629423
aPF11_0060_0	aPF11_0060_0::PF11_0060::hypothetical protein	1.8501	2.28852	5.02595	NA	11.5319	1.84258	2.57045	4.21254	7.66388	9.7151	1.76714	2.39648	5.25473	6.08309	6.86165
aPF14_0708_2	aPF14_0708_2::PF14_0708::hypothetical protein	1.85152	1.68317	1.18475	2.60152	5.56239	1.84632	1.499	2.16915	2.18506	5.16416	NA	2.01712	NA	5.01054	3.98128
aPFB0450w_0	aPFB0450w_0::PFB0450w::Sec61-gamma subunit of protein trans	1.40852	1.48692	1.42961	0.935408	0.738951	1.75781	1.56118	1.44563	1.20243	0.907148	1.63995	1.73106	1.22821	1.0512	0.997951
aPF07_0042_4	aPF07_0042_4::PF07_0042::hypothetical protein	0.718458	0.458951	0.34178	0.299602	0.297124	0.387715	0.335558	0.381545	0.252123	0.288868	0.521138	0.31552	0.346569	0.460233	0.222287
aPF14_0268_0	aPF14_0268_0::PF14_0268::hypothetical protein	1.50365	1.40073	1.12226	0.715791	0.740881	1.77776	1.60523	1.43715	0.938995	0.969652	5.04254	1.81332	1.47409	1.42739	1.10207
aMAL7P1.123_0	aMAL7P1.123_0::MAL7P1.123::hypothetical protein	2.20223	1.61567	0.999834	0.951676	NA	0.815324	1.44069	2.50689	1.96526	2.79071	0.988248	2.21601	2.16723	NA	NA
aPF14_0204_1	aPF14_0204_1::PF14_0204::hypothetical protein	1.60588	1.86176	1.74588	2.24362	2.29596	1.22548	2.00946	2.88137	2.98507	2.98666	1.91234	1.99257	2.5618	3.22163	2.12342
aMAL7P1.171_0	aMAL7P1.171_0::MAL7P1.171::hypothetical protein	0.170385	0.148484	0.163238	0.189793	0.202585	0.177028	0.138628	0.144139	0.148688	0.173997	0.135068	0.122771	0.135818	0.164083	0.197718
aPFI1465w_0	aPFI1465w_0::PFI1465w::hypothetical protein	0.894523	0.761111	0.891433	0.551755	1.22323	NA	0.842133	1.51488	0.64162	1.29737	NA	1.21543	1.34998	NA	1.18865
aPFL1025c_0	aPFL1025c_0::PFL1025c::hypothetical protein	2.70203	2.47958	3.201	2.70726	2.07794	1.97348	2.92026	3.45369	5.25902	3.62521	2.67435	2.70832	3.75723	6.46461	5.36179
aPF14_0708_1	aPF14_0708_1::PF14_0708::hypothetical protein	1.83448	2.24699	1.89254	3.2075	5.819	1.93484	2.02112	2.55635	2.41133	5.83312	NA	2.36824	3.17883	5.14794	4.04094
aPFL1920c_0	aPFL1920c_0::PFL1920c::hydroxyethylthiazole kinase, putative	1.17566	1.40904	0.771555	0.588358	0.628977	1.52967	1.27097	1.22518	0.709499	0.785519	1.48012	1.65249	1.1603	0.860436	0.492541
aPF13_0260_0	aPF13_0260_0::PF13_0260::hypothetical protein, conserved	3.25436	2.69556	2.3338	1.65933	1.45861	3.47946	3.28691	2.87289	2.13981	1.55584	2.96474	3.22027	2.5817	2.01836	1.43434
aPFF0915w_0	aPFF0915w_0::PFF0915w::N-acetylglucosamine transferase	2.63529	2.54811	2.84902	2.00096	1.4644	2.6978	2.78811	2.77821	2.75719	1.99505	2.20836	2.47751	2.74328	2.40789	1.9842
aPFE1345c_1	aPFE1345c_1::PFE1345c::minichromosome maintenance protein 3, putative	2.74036	2.12031	2.43327	1.67289	1.25988	2.97207	2.35409	2.48146	2.21254	1.8616	2.44023	2.60519	2.29485	2.33318	2.49663
aMAL13P1.380_5	aMAL13P1.380_5::MAL13P1.380::chloroquine resistance marker protein, putative	2.55436	2.93022	4.93795	5.6721	4.83888	2.97207	2.9669	3.90307	5.6873	5.80609	2.65296	3.084	4.06048	4.41157	4.52178
aPF14_0542_0	aPF14_0542_0::PF14_0542::hypothetical protein, conserved	0.558012	0.469334	0.658054	0.395854	0.380087	0.642037	0.506575	0.471985	NA	0.385158	0.504254	0.592982	0.451945	0.420213	0.50892
aMAL13P1.119_1	aMAL13P1.119_1::MAL13P1.119::cAMP-specific 3',5'-cyclic phosphodiesterase 4B, putative	1.62576	1.94171	0.687386	0.657497	1.37758	NA	1.62985	1.32269	0.376568	1.71632	NA	NA	1.27622	3.30034	2.71892
aPF11_0097_0	aPF11_0097_0::PF11_0097::succinyl-CoA synthetase alpha subunit, putative	2.70345	2.65298	2.35548	1.82066	1.48755	2.38364	2.64948	2.0773	1.78264	1.70787	2.6372	2.34123	2.18011	1.72221	1.84966
aPFI1160w_1	aPFI1160w_1::PFI1160w::hypothetical protein	1.36166	1.40593	1.6107	1.4831	1.20779	1.55211	NA	1.39193	1.39475	1.38691	1.47787	1.24612	NA	1.38203	1.55133
aPFC0105w_0	aPFC0105w_0::PFC0105w::serine/threonine protein kinase, putative	0.468559	0.469334	0.499917	0.488039	0.451474	NA	0.454752	0.462093	0.402426	0.452729	0.489622	0.455479	0.521024	0.508258	0.444574
aPFL1155w_0	aPFL1155w_0::PFL1155w::GTP cyclohydrolase I	0.546653	0.461027	0.510119	0.414833	0.304842	0.572223	0.523418	0.471985	0.431517	0.283801	0.444599	0.491082	0.396915	0.364185	0.34045
aPF14_0366_1	aPF14_0366_1::PF14_0366::small subunit DNA primase	1.32333	1.1048	1.0585	0.709012	0.725446	1.31275	1.30854	1.1305	0.981015	0.886877	1.27752	1.23875	0.96009	0.991169	0.955834
aMAL13P1.125_0	aMAL13P1.125_0::MAL13P1.125::hypothetical protein	0.400405	0.561747	0.46931	0.501596	1.01871	0.431349	0.647795	0.877554	0.583437	1.38015	NA	0.647001	0.562004	0.759052	1.13717
aMAL13P1.308_2	aMAL13P1.308_2::MAL13P1.308::hypothetical protein, conserved	2.10142	2.06216	3.15764	5.75751	7.95289	1.99842	2.174	3.22335	5.30589	6.30781	1.93035	2.21846	2.94115	4.58232	5.44252
aPFF1240w_0	aPFF1240w_0::PFF1240w::poly(A) polymerase PAP, putative	0.786612	0.762149	0.867203	0.802553	0.758245	0.781664	0.786423	0.758851	0.730509	0.829441	0.866687	0.935511	0.837151	1.07254	1.18748
aPF11_0443_0	aPF11_0443_0::PF11_0443::hypothetical protein, conserved	3.17201	2.66025	2.98547	2.09315	1.48562	3.40466	3.00318	3.21487	3.0384	2.05755	2.56517	2.836	2.63439	1.88229	0.884468
aPF11_0521_4	aPF11_0521_4::PF11_0521::erythrocyte membrane protein 1 (PfEMP1)	NA	0.0342655	0.047186	NA	NA	0.0448802	0.0310941	NA	NA	0.0185822	NA	0.0294649	0.0421503	NA	NA
aPFD1045w_0	aPFD1045w_0::PFD1045w::	2.54442	1.96248	1.50485	0.858135	0.798762	2.77883	2.53676	1.93457	1.44486	1.12845	2.48863	2.3928	1.75743	1.63149	0.865749
aPF07_0101_2	aPF07_0101_2::PF07_0101::hypothetical protein	3.20324	2.82639	3.46498	2.92417	2.73972	2.57937	3.57712	4.43864	4.08729	4.62189	3.38908	3.5186	3.92349	4.07673	3.71804
aPF14_0170_3	aPF14_0170_3::PF14_0170::hypothetical protein	0.817849	1.07365	1.28933	1.2445	1.65541	0.848984	1.08182	1.2266	1.24283	1.63523	0.906081	1.00426	1.37223	1.24463	1.52325
aPFF1365c_5	aPFF1365c_5::PFF1365c::null	2.7503	3.44317	5.58325	6.21979	6.20488	3.27626	3.47607	5.33457	7.41499	8.19812	2.91297	3.42407	5.46549	5.21998	4.43872
aPF14_0318_0	aPF14_0318_0::PF14_0318::hypothetical protein	1.08479	1.2834	1.31866	0.917785	0.771751	0.952458	1.36555	1.11637	0.769297	0.682473	1.11769	1.15036	0.997557	0.912463	1.64843
aPFI0565w_1	aPFI0565w_1::PFI0565w::hypothetical protein	2.37829	2.21895	1.78669	1.36922	1.20007	2.89477	2.44607	2.19318	1.72445	1.36832	1.67259	2.61378	2.50092	2.37187	1.19216
aPFL1985c_1	aPFL1985c_1::PFL1985c::hypothetical protein	1.00101	0.982279	0.910563	0.958454	1.17885	0.725564	0.877114	1.07257	0.905055	1.20277	0.949979	0.985847	1.00575	1.37403	2.68499
aPFC0110w_0	aPFC0110w_0::PFC0110w::Cytoadherence linked asexual protein, CLAG	3.18194	3.02056	5.40089	5.69786	4.94306	2.55942	3.00577	2.32884	3.49739	2.90727	2.64171	1.65986	2.45408	2.69737	3.15647
aPFC0095c_0	aPFC0095c_0::PFC0095c::hypothetical protein	1.02515	0.929323	0.609592	0.638518	0.636694	0.528589	NA	0.85353	0.673943	0.596319	0.95223	0.928145	0.931989	0.852432	0.298332
aPF10_0312_0	aPF10_0312_0::PF10_0312::hypothetical protein	2.16247	2.2013	1.74206	1.32177	1.42195	2.85239	1.98873	2.26807	1.9087	1.65212	1.97762	2.26143	2.15083	2.00102	1.22258
aPFE1330c_1	aPFE1330c_1::PFE1330c::hypothetical protein	1.09615	1.06016	0.886332	0.611404	0.459192	1.40251	1.15567	0.982125	0.593134	0.467933	NA	1.17491	0.851201	0.540274	0.68441
aPFF1340w_1	aPFF1340w_1::PFF1340w::hypothetical protein	0.69574	0.762149	0.594289	0.641229	0.918383	0.415142	0.702209	0.935492	0.623842	0.755112	0.765386	0.692426	0.708359	0.749714	1.72682
aPFF0095c_2	aPFF0095c_2::PFF0095c::hypothetical protein	1.42272	1.53676	1.24342	1.36515	1.82905	0.959938	1.67131	1.80739	1.43516	1.84977	1.31466	1.67091	1.97872	1.96366	2.00643
aMAL13P1.66_3	aMAL13P1.66_3::MAL13P1.66::hypothetical protein	NA	0.551364	0.367286	0.279267	NA	0.488696	0.42884	0.576557	0.307072	0.662201	NA	NA	0.659184	1.41138	3.30739
aPF10_0232_0	aPF10_0232_0::PF10_0232::hypothetical protein	1.09331	1.24498	1.91932	2.25311	2.6799	1.405	1.40053	1.59118	2.08001	2.3025	1.27639	1.40327	1.71997	2.07572	2.35624
aPFC0720w_1	aPFC0720w_1::PFC0720w::hypothetical protein	2.06876	2.1878	2.49831	NA	1.36407	2.15051	2.37741	2.18329	2.5083	1.83964	2.09355	2.09324	2.19181	2.01169	2.21117
aMAL8P1.26_0	aMAL8P1.26_0::MAL8P1.26::hypothetical protein	1.21683	1.3104	1.16435	0.867625	0.846997	0.936251	1.12716	1.00615	0.811317	0.741598	1.22912	1.23753	0.937844	0.799072	0.814272
aPF13_0187_1	aPF13_0187_1::PF13_0187::hypothetical protein	1.46815	1.44019	1.15542	0.905584	0.756316	1.83884	1.48993	1.33541	0.948692	0.957827	0.933095	1.62916	1.50102	1.60081	2.0661
aPF11_0172_0	aPF11_0172_0::PF11_0172::hypothetical protein, conserved	2.28174	2.39651	2.51106	2.4646	2.22843	2.37117	2.36315	2.31612	2.73618	2.51366	2.55616	2.38789	2.14966	2.13708	1.5408
ac11rRNA18s_1	ac11rRNA18s_1::c11rRNA18s::	1.02089	0.680119	0.53435	0.539554	0.600036	0.56973	0.434022	0.563839	0.60768	0.83113	0.85318	0.511953	0.439065	0.931139	0.412986
aPF07_0085_1	aPF07_0085_1::PF07_0085::ferrodoxin reductase-like protein	0.637525	0.699848	0.703964	0.481261	0.451474	0.68567	0.619292	0.55536	0.397578	0.452729	0.536895	0.688742	0.613521	0.501588	0.68207
ac7rRNAITS2_0	ac7rRNAITS2_0::c7rRNAITS2::	1.67687	1.8275	1.60815	1.02217	0.926101	1.47481	1.81642	1.4103	0.850105	0.766937	1.06816	1.39467	1.42023	0.74171	1.85785
aPFL1110c_0	aPFL1110c_0::PFL1110c::cAMP-dependent protein kinase regulatory subunit, putative	3.91318	3.82943	4.82318	6.33502	8.42366	3.49692	4.42185	5.12684	7.23559	7.8704	3.14033	3.87709	4.25952	5.02121	4.05849
aPFD0320c_5	aPFD0320c_5::PFD0320c::hypothetical protein	0.613387	0.708155	0.974328	0.877115	0.690717	0.900098	0.822699	0.739067	0.898591	0.962895	0.680968	0.714524	0.803197	1.00451	2.06844
aPF11_0091_1	aPF11_0091_1::PF11_0091::hypothetical protein	2.16957	2.45362	3.61419	6.15607	5.25176	2.27892	2.51733	3.10041	4.03719	5.73851	2.0294	2.33018	3.40481	4.91849	5.81924
aPF13_0118_1	aPF13_0118_1::PF13_0118::hypothetical protein	0.718458	0.715423	0.723094	0.549044	0.40324	0.814077	0.795492	0.62319	0.468689	0.35644	0.772139	0.809058	0.659184	0.488248	0.931265
aPFC0755c_2	aPFC0755c_2::PFC0755c::protein kinase, putative	2.10994	2.37886	2.92681	2.08772	1.47404	2.35247	2.53806	2.71038	2.88001	2.23493	2.11832	2.54503	2.79363	2.61599	3.51096
aPFL1950w_0	aPFL1950w_0::PFL1950w::erythrocyte membrane protein 1 (PfEMP1)	0.0951318	0.0892981	0.156862	0.0759172	NA	0.135887	0.072553	0.159684	NA	NA	0.0697852	0.0319203	0.0386378	0.0293482	0.0620063
aPF10_0078_1	aPF10_0078_1::PF10_0078::hypothetical protein	1.25091	1.3239	1.53546	1.16994	0.937677	1.52094	1.51454	1.50074	1.51597	1.44603	1.37094	1.48061	1.77617	1.76756	1.6145
aPF14_0275_0	aPF14_0275_0::PF14_0275::hypothetical protein	1.49229	1.34778	1.17072	0.981501	0.889443	1.28657	1.42903	1.34389	1.23475	0.97303	1.32142	1.24735	1.14625	0.915131	0.593155
aMAL7P1.146_1	aMAL7P1.146_1::MAL7P1.146::hypothetical protein	1.39858	1.51495	1.46277	1.21603	0.968547	1.55834	1.68297	1.67315	1.49496	1.2771	1.68835	1.74089	1.74455	1.53011	1.18163
aPF11_0508_0	aPF11_0508_0::PF11_0508::hypothetical protein	1.07343	0.916863	0.888883	0.471771	0.470768	1.39503	1.03129	0.761677	0.517174	0.513544	0.918463	1.00549	0.618204	0.500254	0.449254
aPF07_0120_3	aPF07_0120_3::PF07_0120::hypothetical protein	1.74361	1.83684	1.80327	1.31228	1.14605	2.19165	2.17529	2.26949	1.5693	1.36326	1.71649	2.02817	1.98106	1.43806	1.95846
aMAL13P1.356_1	aMAL13P1.356_1::MAL13P1.356::erythrocyte membrane protein 1 (PfEMP1)	0.315213	0.263741	0.302246	0.249442	0.212231	0.367769	0.270778	0.414047	0.181011	0.371644	0.32754	0.209938	0.272806	0.213442	NA
aMAL7P1.115_0	aMAL7P1.115_0::MAL7P1.115::hypothetical protein	1.05923	1.21591	0.950097	NA	0.874008	0.74551	1.39924	1.24214	0.772529	0.753423	1.05916	1.30751	1.10879	0.919133	0.868089
aPF11_0226_1	aPF11_0226_1::PF11_0226::hypothetical protein	0.508316	0.802645	0.360909	0.760527	3.20855	0.165808	0.659455	1.50922	0.389497	1.5457	NA	0.845889	1.10996	NA	0.264404
aPF10_0056_0	aPF10_0056_0::PF10_0056::hypothetical protein	0.594928	NA	0.422124	NA	NA	0.476229	0.57265	0.847878	NA	0.844645	0.308405	0.570883	0.471849	1.0552	0.85522
aPFB0335c_0	aPFB0335c_0::PFB0335c::cysteine protease, putative	4.05943	3.86889	4.40233	2.41444	1.61296	3.74875	4.18087	3.43532	2.68123	2.00181	3.85732	3.93234	3.68229	1.8356	2.38081
aPFI0905w_0	aPFI0905w_0::PFI0905w::hypothetical protein	2.11846	1.90953	2.42052	1.73525	1.45475	1.97473	1.9382	2.27938	2.12203	1.69098	1.84593	1.72247	1.89208	1.69152	2.38198
aPF14_0501_1	aPF14_0501_1::PF14_0501::hypothetical protein	1.19128	1.44123	1.82623	1.42616	1.30426	1.35264	1.51195	1.59966	1.81173	1.77206	1.2944	1.44624	1.64152	1.85561	2.52237
aPF13_0024_0	aPF13_0024_0::PF13_0024::hypothetical protein	1.79046	NA	1.96906	1.47632	1.03993	2.15924	1.97448	2.06034	1.76486	1.33623	1.46211	1.95205	2.28197	2.20912	1.35712
aPF14_0200_1	aPF14_0200_1::PF14_0200::hypothetical protein	0.975455	0.890904	0.798337	0.458214	0.461121	1.08211	0.887478	0.774395	0.576973	0.471312	0.971364	0.887631	0.742313	0.693685	0.8482
aMAL7P1.145_1	aMAL7P1.145_1::MAL7P1.145::DNA mismatch repair protein pms1 homologue, putative	0.715618	0.714385	0.663155	0.558534	0.528649	0.784157	0.7048	0.746133	0.594751	0.621658	0.831794	0.840978	0.792659	0.673675	0.388417
aPFL1890c_1	aPFL1890c_1::PFL1890c::hypothetical protein, conserved	1.16004	1.3457	1.57372	1.72983	1.90622	0.814077	1.26579	1.6901	1.73415	1.97478	1.2415	1.23139	1.55839	2.11974	1.61801
aPF11_0205_0	aPF11_0205_0::PF11_0205::hypothetical protein	1.29067	1.13595	1.17838	1.19298	0.870149	1.15068	1.27745	1.34954	1.27677	1.05243	1.29553	1.20806	1.13454	1.4514	0.582626
aPF10_0079_1	aPF10_0079_1::PF10_0079::hypothetical protein	1.23955	1.47861	1.71528	1.61053	1.63611	1.40999	1.67131	1.81587	1.90546	2.3498	1.30116	1.49903	1.88974	1.86628	1.70693
aPF11_0237_0	aPF11_0237_0::PF11_0237::hypothetical protein	1.95375	2.24595	1.89509	1.87895	2.02778	2.19913	1.85917	2.06034	2.24001	2.10485	1.42384	2.20619	2.33583	1.65684	1.74788
aMAL13P1.188_1	aMAL13P1.188_1::MAL13P1.188::hypothetical protein	1.66694	2.52734	2.30574	2.93501	2.95195	1.592	2.50826	2.92801	4.65619	5.64391	2.33555	2.84459	3.55702	4.41157	4.93009
aPF07_0018_0	aPF07_0018_0::PF07_0018::hypothetical protein	1.5718	1.64786	1.28933	1.03573	0.864361	1.99468	1.74905	1.35943	1.3495	1.73828	1.45311	1.98643	1.65908	2.03703	1.70459
aPF11_0129_0	aPF11_0129_0::PF11_0129::hypothetical protein	1.10466	1.28652	0.822567	0.753749	0.652129	NA	1.22951	1.07539	0.992328	0.761869	1.32592	1.36889	0.923794	0.829754	0.85054
aPF14_0709_0	aPF14_0709_0::PF14_0709::ribosomal protein L20, putative	0.92434	0.807836	0.83277	0.707657	0.769821	0.728057	0.795492	0.871901	0.979399	0.699366	0.96236	0.813968	0.76573	0.648329	0.690259
aPF10_0381_0	aPF10_0381_0::PF10_0381::hypothetical protein	NA	0.172366	0.274189	0.319937	0.333782	0.147107	0.158062	0.364588	0.192324	NA	NA	0.120315	0.16743	0.22278	0.17549
aPFL2535w_1	aPFL2535w_1::PFL2535w::RESA-like protein, putative	1.38438	1.3239	1.13374	1.01539	NA	1.77028	1.57285	1.09376	0.997177	0.638551	1.28427	1.40327	1.02332	0.932473	0.836501
aPFL2240w_0	aPFL2240w_0::PFL2240w::hypothetical protein	0.6929	0.590821	0.465484	0.441946	0.405169	0.819064	0.602449	0.53275	0.404043	0.400361	0.684345	0.664188	0.484728	0.436221	0.600175
aPF14_0615_0	aPF14_0615_0::PF14_0615::ATP synthase (C/AC39) subunit, putative	1.1856	1.23979	1.54184	1.91691	2.24965	1.17312	1.13234	1.30715	1.78587	1.84639	1.06816	1.14913	1.09239	1.35936	1.00965
aPFF0920c_2	aPFF0920c_2::PFF0920c::hypothetical protein	1.46673	1.64163	1.72675	1.13469	0.941536	1.85879	1.7024	1.77348	1.36082	1.06256	1.1931	1.62794	1.75509	1.30466	1.07517
aMAL13P1.203_0	aMAL13P1.203_0::MAL13P1.203::hypothetical protein	0.594928	0.411187	0.585362	0.409411	0.52672	0.541056	0.47289	0.575144	0.315153	0.408808	0.353428	0.493537	0.413307	0.573624	0.799063
aPF14_0284_1	aPF14_0284_1::PF14_0284::hypothetical protein	0.854766	NA	0.733296	0.637162	0.789115	0.784157	0.732008	1.04148	0.447679	0.755112	0.830668	0.818879	0.7107	0.716363	1.00497
aPFI1430w_1	aPFI1430w_1::PFI1430w::hypothetical protein	0.942798	0.842102	0.742223	0.558534	0.659847	0.932511	0.93412	0.798418	0.505861	0.54564	0.969113	0.923234	0.743484	0.541608	0.442234
aPF14_0712_4	aPF14_0712_4::PF14_0712::hypothetical protein	1.23103	1.37374	1.084	0.875759	1.68628	1.72415	1.51325	1.52618	1.03596	1.44772	NA	1.63285	1.73636	1.16192	1.25183
aPF11_0439_1	aPF11_0439_1::PF11_0439::hypothetical protein	0.644624	0.61055	0.543277	0.488039	0.511285	0.63705	0.584311	0.542642	0.454144	0.469622	0.670838	0.640862	0.517512	0.50559	0.424685
aPF07_0081_1	aPF07_0081_1::PF07_0081::hypothetical protein	1.48945	1.6219	1.10951	0.62225	0.630906	1.93982	1.69593	1.58836	0.934146	0.777073	1.56229	1.89189	1.49282	0.995171	0.459783
aPF14_0682_0	aPF14_0682_0::PF14_0682::hypothetical protein	0.734076	0.655199	0.725645	NA	0.933818	0.775431	0.734599	0.987778	0.404043	0.787209	NA	0.991986	0.956577	NA	0.425855
aPF13_0106_1	aPF13_0106_1::PF13_0106::hypothetical protein	1.05639	0.997854	1.14522	0.936764	1.09589	0.877658	1.10514	1.10365	1.1491	1.18926	1.30566	1.37748	1.50219	2.06105	1.4589
aPF10_0025_0	aPF10_0025_0::PF10_0025::PF70 protein	0.198783	0.158868	0.210424	0.273844	0.528649	0.220661	0.180087	0.163923	0.214951	0.310829	0.191346	0.180473	0.182651	0.29615	0.348639
aPF11_0481_1	aPF11_0481_1::PF11_0481::hypothetical protein	0.139148	0.156791	0.155586	0.142345	0.192938	0.170794	0.123081	0.189359	0.169698	0.255083	0.131691	0.144869	0.168601	0.293482	0.33928
aPFL1520w_0	aPFL1520w_0::PFL1520w::dim1 protein homolog, putative	0.827788	0.834833	0.752426	1.2201	1.48755	0.769197	0.733303	0.854944	1.12162	1.12338	0.787897	0.783276	0.796172	1.05787	0.591985
aPFF0800w_1	aPFF0800w_1::PFF0800w::hypothetical protein	NA	NA	0.507569	0.462281	0.80455	0.718084	0.76958	0.870488	0.313537	0.832819	0.47724	0.730485	0.895693	NA	0.491371
aPF11_0507_4	aPF11_0507_4::PF11_0507::antigen 332, putative	0.381947	0.476603	0.507569	0.508374	0.428322	0.469996	0.4405	0.425352	0.444447	0.405429	0.451352	0.477577	0.477703	0.480244	0.417665
aPFI0755c_0	aPFI0755c_0::PFI0755c::6-phosphofructokinase, putative	0.643204	0.631317	0.655503	0.382297	0.387805	0.791637	0.73719	0.528511	0.386265	0.375022	0.63482	0.600348	0.499949	0.502922	0.541678
aPF14_0177_1	aPF14_0177_1::PF14_0177::DNA replication licensing factor MCM2	2.3641	2.2283	2.27386	1.39362	1.07273	2.80501	2.43441	2.06034	1.70506	1.42914	2.25339	2.47014	1.91315	1.68619	1.5174
aPF14_0648_2	aPF14_0648_2::PF14_0648::hypothetical protein	1.09473	0.880521	1.07253	0.923207	1.17306	0.942485	0.796787	0.839399	0.861419	0.991613	0.837422	0.719435	0.847689	0.796404	0.967533
aPFD0165w_1	aPFD0165w_1::PFD0165w::ubiquitin-specific protease, putative	0.69432	1.09857	1.20898	1.28788	0.926101	1.37508	1.14141	1.20257	1.34465	1.2619	1.01414	1.21052	1.36988	0.745712	0.479672
aPFC0865w_0	aPFC0865w_0::PFC0865w::RNA-binding protein, putative	0.545233	0.551364	0.540726	0.431101	0.426392	0.467502	0.551921	0.466333	0.34586	0.307451	0.507631	0.504587	0.423844	0.340173	0.51009
aPFF1140c_1	aPFF1140c_1::PFF1140c::ATP-dependent DEAD box helicase, putative	0.682961	0.661429	0.594289	0.393143	0.648271	0.837764	NA	0.62319	0.463841	0.572669	0.523389	0.837295	0.673234	0.418879	0.427025
aPFE0440w_0	aPFE0440w_0::PFE0440w::hypothetical protein	2.20365	2.59276	3.04414	2.52425	1.57823	2.83867	3.0537	3.17954	3.28406	2.79577	2.65634	2.83109	3.51955	4.09141	5.73968
aMAL13P1.380_11	aMAL13P1.380_11::MAL13P1.380::chloroquine resistance marker protein, putative	2.76308	3.51378	4.95836	5.96899	5.55854	2.66913	3.69891	5.43066	7.7059	7.32645	2.9805	3.65979	4.92573	4.75841	2.8441
aPF14_0588_2	aPF14_0588_2::PF14_0588::hypothetical protein	3.4787	NA	NA	6.92338	11.7788	3.68018	4.78591	5.25684	5.36245	8.7691	NA	4.48849	6.01344	5.17196	7.68411
aMAL13P1.93_1	aMAL13P1.93_1::MAL13P1.93::hypothetical protein	0.363489	0.343694	0.424674	0.357895	0.410957	NA	0.387381	0.354696	0.313537	0.337858	0.345549	0.351124	0.331348	0.320162	0.424685
aPF14_0632_1	aPF14_0632_1::PF14_0632::26S proteasome subunit, putative	1.64848	1.52326	1.63876	1.24857	0.89909	1.77028	1.69333	1.51629	1.46102	1.23318	1.73225	1.58497	1.71177	1.92231	1.75139
aPF14_0738_0	aPF14_0738_0::PF14_0738::lysophospholipase, putative	1.05497	1.2429	0.72947	0.877115	1.14219	NA	1.36944	1.24779	0.80162	0.893634	NA	1.06196	1.09239	1.02852	0.866919
aPF10_0260_1	aPF10_0260_1::PF10_0260::hypothetical protein	0.660243	0.609511	0.627447	0.498884	0.524791	0.701877	NA	0.74472	0.408891	0.528747	0.680968	0.656822	0.55732	0.437555	0.499561
aPF13_0254_3	aPF13_0254_3::PF13_0254::hypothetical protein	1.40426	1.56479	1.73951	1.2323	1.27918	1.81391	1.63762	1.62086	1.5693	1.53387	1.2325	1.36398	1.86983	1.25264	1.94794
aMAL7P1.131_0	aMAL7P1.131_0::MAL7P1.131::hypothetical protein	0.538133	0.562786	0.494816	0.435168	0.659847	0.376495	0.511758	0.493182	0.446063	0.623348	0.543649	0.472666	0.469507	0.420213	0.366188
aPFL0365c_0	aPFL0365c_0::PFL0365c::hypothetical protein	0.877484	0.848332	0.531799	0.422967	1.00906	0.344082	0.798083	1.33541	0.460608	0.95107	0.750753	1.05337	1.04673	0.586964	0.436384
aPF14_0392_2	aPF14_0392_2::PF14_0392::Ser/Thr protein kinase, putative	3.4716	3.83359	3.03138	2.62185	2.05865	4.19755	3.89065	3.90448	3.70265	2.60995	3.07167	4.75122	4.67634	3.09624	2.55162
aPF10_0388_0	aPF10_0388_0::PF10_0388::hypothetical protein	0.600608	0.395611	0.613418	0.493462	0.544084	0.546043	0.377016	0.404155	NA	0.511855	0.497501	0.353579	0.343056	0.430885	0.451593
aORF470_1	aORF470_1::ORF470::	2.02048	2.1525	1.85428	1.99825	1.79625	1.29405	1.40312	1.23649	1.47233	1.24838	1.75363	1.50762	1.19543	1.28332	0.631763
aPFI1075w_0	aPFI1075w_0::PFI1075w::hypothetical protein	0.498377	0.517098	0.542002	0.479905	0.457262	0.575963	0.592084	0.524271	0.433134	0.396983	0.512133	0.495993	0.453115	0.381527	0.305352
aPFE0025c_0	aPFE0025c_0::PFE0025c::rifin	NA	NA	0.177266	NA	NA	NA	NA	0.353282	NA	NA	NA	NA	NA	NA	NA
aPFF0330w_0	aPFF0330w_0::PFF0330w::coatomer alpha subunit, putative	1.63144	1.33324	2.00604	1.37464	1.16727	1.95603	1.66354	1.52477	1.56768	1.28555	1.59268	1.63162	1.82183	1.88496	2.11056
aPFD1060w_0	aPFD1060w_0::PFD1060w::u5 small nuclear ribonucleoprotein-specific protein, putative	1.02373	1.01031	0.7486	0.649363	0.611613	1.03225	0.976874	0.828094	0.693337	0.692608	0.823915	1.06933	0.953065	0.844428	0.621233
aPFL2080c_0	aPFL2080c_0::PFL2080c::hypothetical protein	0.391886	0.436107	0.270363	0.271133	0.349217	0.245595	0.318715	0.603406	0.298991	0.543951	0.443473	0.371995	0.395744	0.53894	0.402456
aPF11_0214_1	aPF11_0214_1::PF11_0214::hypothetical protein	1.1856	1.3997	1.20388	1.18214	1.4316	1.22673	1.38758	1.34247	0.969702	1.28893	1.07041	1.47202	1.68367	1.43806	1.46358
aPF13_0255_1	aPF13_0255_1::PF13_0255::hypothetical protein	3.45314	3.19293	3.82334	4.85192	5.8846	2.6791	3.02002	3.77023	6.00246	7.90587	3.05366	3.20431	3.94222	5.69089	4.41766
aMAL8P1.85_0	aMAL8P1.85_0::MAL8P1.85::hypothetical protein	1.16146	1.2834	1.03682	0.630384	0.77561	0.936251	1.3798	1.19692	0.948692	0.832819	1.24037	1.27313	1.07483	0.860436	0.813102
aPFA0700c_0	aPFA0700c_0::PFA0700c::hypothetical protein, conserved in P. falciparum	0.893103	0.923093	1.20898	1.61188	2.13389	0.986118	1.3228	1.91055	1.9087	2.53393	0.772139	1.43396	1.58766	1.65817	1.07985
aPFB0260w_0	aPFB0260w_0::PFB0260w::proteasome 26S regulatory subunit, putative	2.0787	1.8005	1.91295	1.59155	1.26374	2.30136	2.15975	1.98403	1.98304	1.74166	2.03052	1.97047	1.87569	1.98234	1.92454
aPFA0175w_0	aPFA0175w_0::PFA0175w::hypothetical protein	1.75355	1.94483	1.65916	1.85997	2.72814	2.57313	2.46939	1.82859	1.7988	1.8295	1.89208	2.12393	2.03726	NA	1.33372
aPFE1325w_1	aPFE1325w_1::PFE1325w::hypothetical protein	0.938539	1.13595	1.46659	1.25263	1.11325	0.943731	1.1738	1.20681	1.08283	1.45786	1.17959	1.33329	1.95413	2.27182	4.74524
aMAL13P1.178_1	aMAL13P1.178_1::MAL13P1.178::hypothetical protein	1.06491	0.724768	0.914389	0.700878	NA	1.11079	1.21397	1.03441	0.791923	0.513544	1.56679	1.3603	1.28558	0.916465	0.322901
aPFA0555c_0	aPFA0555c_0::PFA0555c::UMP-CMP kinase, putative	2.65375	2.44635	3.17677	3.5776	2.6799	2.82122	2.81791	3.02127	4.66427	4.01882	2.24888	2.53153	2.59575	3.39372	2.73296
aMAL7P1.178_1	aMAL7P1.178_1::MAL7P1.178::hypothetical protein	0.839147	0.74865	0.960299	1.51834	2.22071	0.826544	0.804561	0.994844	1.44647	1.97478	0.749628	0.840978	1.11347	1.88896	1.49634
aPF14_0086_0	aPF14_0086_0::PF14_0086::hypothetical protein	0.256998	0.274124	0.265262	0.216906	0.281689	0.208194	0.24098	0.244471	0.210102	0.211161	0.267885	0.216076	0.234168	0.310824	0.404796
aPF11_0438_0	aPF11_0438_0::PF11_0438::Ribosomal protein, putative	0.782352	0.533712	0.391516	0.26571	0.262395	0.675697	0.583015	0.488943	0.352325	0.268597	NA	0.563517	0.303248	0.341507	0.237496
aPF13_0210_2	aPF13_0210_2::PF13_0210::hypothetical protein	0.785192	0.833795	0.964125	0.755105	0.594248	0.857711	0.830473	0.795592	0.741822	0.611523	0.877942	0.848344	0.953065	0.820416	0.900847
aPFI1480w_1	aPFI1480w_1::PFI1480w::hypothetical protein	0.846247	0.953205	1.12226	1.54003	2.0162	0.994845	0.950962	0.956689	1.03758	1.14872	0.777767	0.913413	0.683771	0.566954	1.19333
aPF14_0385_1	aPF14_0385_1::PF14_0385::hypothetical protein	0.81359	0.659352	0.590463	0.488039	0.80648	1.05095	0.729417	0.821028	0.41374	0.695987	NA	NA	0.715384	NA	0.815442
aPF07_0113_1	aPF07_0113_1::PF07_0113::hypothetical protein	1.17282	1.35505	0.992182	0.558534	0.574954	1.47481	1.43551	1.21388	0.652933	0.682473	1.29553	1.37748	1.12752	0.661669	0.478502
aPFA0110w_0	aPFA0110w_0::PFA0110w::ring-infected erythrocyte surface antigen precursor	0.100811	0.0996816	0.21425	0.649363	1.62454	0.0835271	0.0906912	0.154031	0.410507	0.80748	0.0922965	0.0871671	0.161576	0.344175	0.453933
aMAL13P1.310_0	aMAL13P1.310_0::MAL13P1.310::cysteine protease, putative	1.56186	1.54922	1.39773	1.45056	1.2348	1.29031	1.59746	1.5926	2.13334	1.91565	1.4306	1.60707	1.58532	2.26382	2.38081
aPFD0115c_0	aPFD0115c_0::PFD0115c::hypothetical protein	1.02373	1.17749	1.38242	1.34482	1.51456	1.23919	1.22304	1.11496	1.29778	1.26697	1.07942	NA	0.963602	0.955151	0.609534
aPF14_0572_0	aPF14_0572_0::PF14_0572::hypothetical protein	2.72332	2.73294	2.76485	3.14514	2.77637	2.37616	2.7894	2.88279	3.7883	4.32458	2.76102	2.91457	2.79714	3.07356	2.53758
aPF11_0154_0	aPF11_0154_0::PF11_0154::hypothetical protein	1.29919	1.36335	0.98453	0.824244	0.762104	1.37882	1.37721	1.098	0.906671	0.844645	1.35631	1.39345	1.05961	0.953817	0.747586
aPF11_0134_1	aPF11_0134_1::PF11_0134::hypothetical protein	0.279716	0.345771	0.312448	0.332138	0.210302	0.445062	0.419771	0.450788	NA	0.336169	0.361307	0.466528	0.310273	0.228116	0.319391
aun4tRNAThr1_0	aun4tRNAThr1_0::un-4-tRNA-Thr-1::	NA	0.157829	0.443804	0.295535	0.175573	0.200714	0.215068	0.268495	0.240809	0.429079	0.288145	0.136275	0.193189	0.288146	1.02135
aPF14_0430_0	aPF14_0430_0::PF14_0430::hypothetical protein	0.684381	0.618857	0.650402	NA	0.385875	0.64827	0.702209	0.665584	0.239193	0.40374	0.602178	0.67401	0.490582	0.386863	0.404796
aPFL0945w_0	aPFL0945w_0::PFL0945w::VAR fragment, pseudogene	0.322312	0.345771	0.498642	NA	0.478485	0.178274	0.332966	0.556773	0.307072	0.535505	NA	NA	0.57137	0.620315	0.395437
aPF11_0085_0	aPF11_0085_0::PF11_0085::hypothetical protein	0.941378	0.872214	0.799612	0.588358	0.540226	0.986118	1.05202	1.01745	0.669094	0.668958	0.911709	0.931828	0.914427	0.684347	0.601345
aPF14_0605_0	aPF14_0605_0::PF14_0605::cyclin, putative	0.817849	0.752804	0.673357	0.406699	0.424463	0.908825	0.78124	0.723523	0.494548	0.410497	0.70573	0.676465	0.591275	0.500254	0.34279
aPFA0125c_2	aPFA0125c_2::PFA0125c::Ebl-1 like protein, putative	0.354969	0.496331	1.09676	3.25766	5.86531	0.306682	0.409406	0.864836	2.19961	3.49007	0.31741	0.43338	0.89101	1.79291	2.88271
aPF14_0084_3	aPF14_0084_3::PF14_0084::hypothetical protein	1.31623	1.81296	2.18586	1.58342	1.2213	2.08568	1.75034	2.2497	1.88445	1.53725	1.59155	1.98397	2.0115	1.62749	1.51857
aPF14_0387_1	aPF14_0387_1::PF14_0387::hypothetical protein	1.26653	1.20137	0.964125	0.685966	0.544084	1.48728	1.20878	0.972233	0.712731	0.648687	NA	1.23139	0.913256	0.80841	0.954664
aPFA0210c_0	aPFA0210c_0::PFA0210c::hypothetical protein	NA	1.57518	2.38226	3.8067	6.21452	1.72415	1.54693	2.02784	3.16446	4.21815	1.10868	1.68932	2.26206	3.11491	1.85902
aPFE1173c_0	aPFE1173c_0::PFE1173c::	1.3503	1.65824	0.925866	0.634451	0.83735	1.59449	1.58062	1.13757	0.638387	0.815927	1.64445	1.54077	0.957748	NA	0.499561
aPFE1070c_0	aPFE1070c_0::PFE1070c::hypothetical protein	0.424543	0.498408	0.418298	0.371452	0.420604	0.523603	0.448274	0.463507	0.399194	0.349683	0.408581	0.435835	0.474191	0.490916	0.453933
aPFD0330w_1	aPFD0330w_1::PFD0330w::hypothetical protein	0.386207	0.546172	0.452731	0.508374	0.717728	0.590923	0.606336	0.575144	0.580205	0.623348	0.455855	0.827473	0.776268	0.745712	0.646972
aPFD0855c_0	aPFD0855c_0::PFD0855c::hypothetical protein	1.4426	NA	0.692487	0.614116	1.48176	1.31275	1.22692	1.39052	0.68364	1.90214	1.05803	1.44133	1.36169	2.3065	1.41913
aPF13_0313_0	aPF13_0313_0::PF13_0313::zinc finger protein	0.363489	0.364461	0.415747	0.517864	0.590389	0.334108	0.335558	0.351869	0.341012	0.577737	0.303903	0.335163	0.348911	0.517596	1.10441
aMAL13P1.310_3	aMAL13P1.310_3::MAL13P1.310::cysteine protease, putative	1.82454	1.84515	1.53673	1.58342	1.36986	1.25415	1.84233	2.05328	2.27557	1.94268	1.76039	2.09692	2.44589	2.66669	2.86282
aPFB0180w_1	aPFB0180w_1::PFB0180w::5'-3' exonuclease, N-terminal resolvase-like domain, putative	0.715618	0.876367	0.637649	0.607337	0.58846	0.563496	0.798083	0.951036	0.644852	0.672337	NA	0.987075	0.944869	0.629653	0.408306
aPF14_0282_1	aPF14_0282_1::PF14_0282::hypothetical protein, conserved	0.531034	0.506715	0.64275	0.481261	0.449545	0.543549	0.538965	0.528511	0.316769	0.368265	0.470487	0.554923	0.517512	0.460233	0.67739
aPFE1430c_0	aPFE1430c_0::PFE1430c::cyclophilin, putative	0.529614	0.462066	0.46931	0.366029	0.376229	0.585936	0.469003	0.373066	0.362022	0.331101	0.52564	0.483716	0.37584	0.382861	0.465633
aMAL13P1.122_2	aMAL13P1.122_2::MAL13P1.122::hypothetical protein	0.285395	0.319812	0.366011	0.555822	0.914525	0.331615	0.32001	0.374479	0.334547	0.47638	0.261132	0.286055	0.330177	0.405539	0.606024
aPF13_0237_0	aPF13_0237_0::PF13_0237::hypothetical protein	2.10426	2.42974	2.4473	1.8193	1.366	2.6978	2.58081	2.31188	2.0994	1.89876	2.32092	2.57081	2.52785	2.40655	3.24656
aPF13_0076_0	aPF13_0076_0::PF13_0076::hypothetical protein	0.298174	0.275163	0.292043	0.298246	0.418675	0.371509	0.282438	0.282626	0.266668	0.317586	0.326414	0.277461	0.251731	0.294816	0.381398
aPFE1095w_0	aPFE1095w_0::PFE1095w::hypothetical protein	3.69168	4.05787	2.30064	3.37289	4.54947	3.39843	3.00447	4.69866	NA	7.29604	3.49826	6.42704	6.66677	6.44994	4.79087
aPF14_0525_0	aPF14_0525_0::PF14_0525::hypothetical protein	0.752535	0.695695	0.740948	0.892027	1.2676	0.979885	0.848611	0.876141	0.938995	1.25514	0.760883	0.879037	0.892181	0.82175	0.827141
aPF11_0477_0	aPF11_0477_0::PF11_0477::CCAAT-box DNA binding protein subunit B	3.37221	3.60619	3.59889	4.4886	4.65752	3.73753	3.73259	3.6275	4.93902	5.4412	3.11557	4.04283	3.82865	4.90649	2.35039
aPFB0405w_0	aPFB0405w_0::PFB0405w::transmission-blocking target antigen s230 precursor	1.42698	1.82853	1.5074	1.55359	3.38413	0.896358	1.91358	2.39384	2.539	3.5019	1.5893	2.11902	2.47047	2.32118	3.0699
aPF13_0326_0	aPF13_0326_0::PF13_0326::actin-depolymerizing factor, putative	1.88134	2.05905	3.41652	4.25407	4.76942	1.88497	1.96282	2.84604	4.35235	4.32289	1.75926	1.93364	2.53253	2.51594	1.55133
aPFL2395c_0	aPFL2395c_0::PFL2395c::dimethyladenosine transferase, putative	0.80365	0.835872	0.682284	0.505663	NA	0.966172	0.843428	0.743306	0.462225	0.467933	0.587546	0.822562	0.70953	0.54561	0.485521
aPF10_0159_0	aPF10_0159_0::PF10_0159::glycophorin-binding protein 130 precursor	1.23103	1.38101	1.26127	0.732059	0.476556	1.48229	1.64151	1.18844	0.806469	0.675716	1.47787	1.58497	1.43896	0.84176	0.749926
aPF14_0626_7	aPF14_0626_7::PF14_0626::dynein beta chain, putative	0.215821	0.230514	0.198946	0.145056	0.15435	0.195728	NA	0.423939	NA	0.19089	0.227365	0.195205	0.197872	NA	0.129862
aPF13_0234_0	aPF13_0234_0::PF13_0234::phosphoenolpyruvate carboxykinase	0.508316	0.424685	0.457832	0.370096	0.405169	0.497423	0.485846	0.462093	0.381416	0.437526	0.487371	0.48126	0.415649	0.404205	0.594325
aPF00_0003_3	aPF00_0003_3::PF00_0003::hypothetical protein	2.86389	2.82327	3.35531	2.56627	2.13775	3.23138	2.97856	3.13856	3.2679	2.99511	2.49988	2.89002	3.40129	3.80593	5.21906
aPF14_0604_0	aPF14_0604_0::PF14_0604::hypothetical protein	0.619066	0.619895	0.5369	0.553111	0.760175	0.519863	0.570059	0.520032	0.538185	0.672337	0.593174	0.554923	0.439065	0.593634	0.596665
aPF11_0305_1	aPF11_0305_1::PF11_0305::hypothetical protein	0.316633	0.356154	0.335403	0.313158	0.324135	0.391455	0.406815	0.337738	0.289294	0.307451	0.319661	0.373222	0.365302	0.30282	0.245686
aPFE0765w_3	aPFE0765w_3::PFE0765w::phosphatidylinositol 3-kinase, putative	1.18276	1.61463	1.20771	1.05335	1.15956	1.26039	1.3215	1.17148	1.16849	1.34974	1.0873	1.31364	1.35115	1.30866	1.03071
aPF14_0174_1	aPF14_0174_1::PF14_0174::hypothetical protein, conserved	0.451521	0.501523	0.520322	0.443302	0.559519	0.479969	NA	0.481877	NA	0.459487	0.407455	0.414964	0.449603	0.429551	0.421175
aPF14_0073_3	aPF14_0073_3::PF14_0073::hypothetical protein	0.380527	0.424685	0.369836	0.375519	0.540226	0.64079	0.513053	0.527097	0.357174	0.388536	NA	0.589298	0.574883	0.536272	0.591985
aPFE1635w_0	aPFE1635w_0::PFE1635w::RIF pseudogene	0.204462	NA	NA	NA	0.24696	NA	0.1762	0.224688	NA	0.202715	NA	0.244313	0.277489	NA	0.135712
aPF14_0609_1	aPF14_0609_1::PF14_0609::hypothetical protein	0.590669	0.645854	NA	NA	0.351147	0.528589	0.632247	0.566665	0.42182	NA	0.722614	0.574566	0.513999	NA	0.376718
aMAL13P1.145_2	aMAL13P1.145_2::MAL13P1.145::hypothetical protein	NA	1.0695	0.850624	0.862202	NA	0.913811	0.922459	1.23084	0.822631	0.917284	0.888072	0.881492	1.04205	0.875111	0.899677
aPFC0425w_2	aPFC0425w_2::PFC0425w::hypothetical protein	0.522515	0.570054	0.585362	0.714435	1.49527	0.66697	0.576537	0.568078	0.581821	0.868295	0.562783	0.629813	0.592446	0.453563	0.372038
aPFL1620w_7	aPFL1620w_7::PFL1620w::asparagine/aspartate rich protein, putative	1.06207	1.13388	0.905462	0.671054	0.725446	1.23421	1.02611	0.781461	0.678791	0.800723	1.27639	1.46956	NA	1.03786	0.67154
aPFF1105c_1	aPFF1105c_1::PFF1105c::chorismate synthase	1.09331	1.05496	0.959024	0.599203	0.501638	1.11079	1.09736	0.894511	0.712731	0.619969	1.16721	1.1479	0.906231	0.811078	0.84235
aMAL13P1.38_1	aMAL13P1.38_1::MAL13P1.38::hypothetical protein	2.38255	2.62806	3.44968	4.07377	3.4806	2.47589	3.03038	3.91013	5.55316	5.69966	3.12457	2.85319	3.74435	5.7736	4.3112
aPFF0860c_0	aPFF0860c_0::PFF0860c::histone h2a	2.44361	2.52111	3.41015	2.57712	2.34998	2.73645	2.66762	3.06791	3.11921	2.86334	2.13745	1.94591	2.40022	3.25098	3.00087
aPF13_0098_0	aPF13_0098_0::PF13_0098::hypothetical protein	0.911561	0.914786	0.762628	0.587003	0.493921	0.956198	1.0572	0.972233	0.685256	0.54564	0.953355	1.06196	0.823101	0.747046	0.50775
aMAL13P1.485_1	aMAL13P1.485_1::MAL13P1.485::acyl-coa ligase antigen	3.44036	2.94372	1.84153	1.30822	1.19235	3.05061	3.01613	3.02975	1.16526	1.51022	2.60906	2.97718	2.24684	1.71153	0.823631
aMAL8P1.335_1	aMAL8P1.335_1::MAL8P1.335::	0.0724137	0.139139	0.77028	NA	0.221878	NA	0.247457	0.30241	NA	NA	NA	NA	NA	NA	0.239836
aPFE0430w_2	aPFE0430w_2::PFE0430w::ATP-dependent RNA helicase, putative	0.965516	0.934515	1.23959	0.871692	0.812268	0.961185	0.921164	1.07257	0.858186	0.849712	0.861059	0.887631	1.08888	1.29933	1.87189
aPF14_0112_2	aPF14_0112_2::PF14_0112::POM1, putative	1.12596	1.05496	1.12864	0.818821	0.698434	1.54712	1.23858	1.00332	0.733741	0.687541	1.2415	1.20561	0.803197	0.831088	0.638782
aPF13_0269_0	aPF13_0269_0::PF13_0269::glycerol kinase, putative	0.562271	NA	NA	0.559889	1.20007	0.675697	0.621883	0.891685	0.599599	0.858159	NA	0.827473	0.883985	0.724367	0.937115
aMAL13P1.314_0	aMAL13P1.314_0::MAL13P1.314::hypothetical protein	2.65091	2.96345	3.35658	3.35256	3.11016	1.80269	2.94876	3.41554	3.65416	3.47318	2.50776	2.53521	4.07218	3.69654	3.16349
aMAL8P1.18_1	aMAL8P1.18_1::MAL8P1.18::hypothetical protein	1.52495	1.46096	1.30463	0.896094	0.686858	1.88123	1.79698	1.33965	0.919601	0.702744	1.52965	1.62916	1.19309	0.78173	0.942964
aPFL1205c_0	aPFL1205c_0::PFL1205c::hypothetical protein	NA	0.411187	0.329027	0.372808	0.468839	0.301695	NA	0.409808	0.307072	0.393604	0.291522	0.416192	0.415649	0.373523	0.34396
aPF11_0289_1	aPF11_0289_1::PF11_0289::hypothetical protein	1.09615	1.18268	1.06742	0.66292	0.567237	1.20179	1.1453	1.12485	0.782226	0.646998	NA	1.06688	1.02214	0.929805	0.837671
aMAL8P1.40_0	aMAL8P1.40_0::MAL8P1.40::RNA-binding protein, putative	0.634685	0.569016	0.645301	0.455503	0.447615	0.787897	0.720347	0.62319	0.680408	0.489894	0.639322	0.883948	0.646304	0.481578	0.416495
aPFL1330c_1	aPFL1330c_1::PFL1330c::hypothetical protein	1.81318	2.09539	1.55459	1.30686	1.28111	1.1619	2.24914	1.70141	1.68567	1.53894	1.99	2.72919	2.41779	2.08372	2.60544
aPFF0225w_2	aPFF0225w_2::PFF0225w::DNA helicase, putative	NA	0.443375	0.502467	0.45008	0.43411	0.733044	0.542852	0.553947	0.470305	0.49834	0.640448	0.644545	0.573712	0.406873	1.32787
aPFL2350c_0	aPFL2350c_0::PFL2350c::hypothetical protein	0.526774	0.428839	0.360909	0.375519	0.441827	0.492436	0.434022	0.385784	0.271517	0.461176	0.521138	0.454251	0.421503	0.412209	0.303012
aPFF1080w_0	aPFF1080w_0::PFF1080w::hypothetical protein, conserved	1.19128	1.083	0.669531	0.49075	0.52672	1.30277	0.931528	0.761677	0.578589	0.50003	1.23475	0.910957	0.744655	0.50559	0.271424
aMAL8P1.34_0	aMAL8P1.34_0::MAL8P1.34::hypothetical protein	0.880324	1.00305	0.908012	0.706301	0.536367	0.829038	0.927642	0.849291	0.646468	0.584494	0.920714	0.946561	0.838322	0.677677	0.486691
aPFF1400w_2	aPFF1400w_2::PFF1400w::hypothetical protein	0.611967	0.576284	0.552204	0.523286	0.762104	0.70437	0.583015	NA	0.462225	NA	1.07041	0.639634	0.521024	0.659001	0.487861
aPF10_0001_3	aPF10_0001_3::PF10_0001::erythrocyte membrane protein 1 (PfEMP1)	0.11359	NA	0.154311	NA	0.131198	NA	NA	NA	NA	0.111493	NA	0.112949	0.108888	0.0933807	0.195378
aPF11_0471_0	aPF11_0471_0::PF11_0471::hypothetical protein	0.377687	0.31462	0.383865	0.463637	0.55759	0.437582	0.37313	0.356109	0.386265	1.08283	0.366935	0.347441	0.324323	0.341507	0.367358
aMAL13P1.123_0	aMAL13P1.123_0::MAL13P1.123::hypothetical protein	2.04604	2.1795	2.59268	1.69729	1.40845	2.05327	2.15068	2.04904	2.13334	2.07783	2.28378	2.48856	2.39671	2.45591	3.13074
aPFL0370w_0	aPFL0370w_0::PFL0370w::hypothetical protein	NA	0.524367	0.335403	0.413478	1.2541	NA	0.502689	0.979299	0.370103	1.01019	NA	0.607714	0.866422	1.14725	0.458613
aPFD0380c_1	aPFD0380c_1::PFD0380c::hypothetical protein	1.79472	2.70594	2.80183	3.59251	3.12945	2.73395	2.83734	3.39999	4.09376	4.6844	2.07217	2.70832	3.03599	3.04154	2.03451
aPFE1045c_1	aPFE1045c_1::PFE1045c::hypothetical protein	1.14584	1.35816	1.27275	0.932697	0.673353	1.14195	1.29429	1.18986	1.0198	0.726394	1.21561	1.29523	1.08303	0.736374	0.542848
aPFI1070c_1	aPFI1070c_1::PFI1070c::hypothetical protein	0.357809	0.315658	0.374938	0.355184	0.466909	0.380235	0.347218	0.281213	0.310305	0.30914	0.395074	0.348668	0.277489	0.305488	0.271424
aPFD0940w_0	aPFD0940w_0::PFD0940w::hypothetical protein	4.24969	4.332	3.4127	2.80351	1.96411	4.86202	4.44776	4.4231	3.06587	2.26703	5.04817	5.09743	4.06633	2.10774	1.57824
aPF13_0006_0	aPF13_0006_0::PF13_0006::RIFIN	0.283975	NA	NA	NA	NA	NA	NA	0.366001	NA	NA	NA	0.154691	0.256414	NA	NA
aPFA0270c_0	aPFA0270c_0::PFA0270c::hypothetical protein	0.707099	0.543057	0.424674	0.280622	0.416745	0.460022	0.706096	0.613298	0.41374	0.457797	0.606681	0.623674	0.516341	0.51226	0.606024
aPF14_0416_1	aPF14_0416_1::PF14_0416::hypothetical protein	1.17424	0.9314	0.816191	0.536843	0.52672	1.13697	1.01963	0.911469	0.672327	0.555776	0.929718	1.07056	0.853543	0.78173	0.594325
aPFL0420w_1	aPFL0420w_1::PFL0420w::hypothetical protein	2.1	2.24076	2.2407	1.44785	1.05923	2.98578	2.70389	2.65244	1.88122	1.34805	2.21962	2.34369	2.68825	1.72087	1.65545
aPF13_0135_1	aPF13_0135_1::PF13_0135::hypothetical protein	0.752535	0.779801	1.16307	NA	0.584601	0.841504	0.834359	0.919948	0.557579	0.57098	0.777767	0.768543	0.832468	0.556282	0.84235
aPFI0260c_3	aPFI0260c_3::PFI0260c::hypothetical protein	0.6929	1.10065	0.70524	0.711724	1.15956	0.554769	0.633543	0.811137	0.525255	0.917284	0.610057	0.730485	0.725921	1.06187	5.60865
aPF10_0254_0	aPF10_0254_0::PF10_0254::hypothetical protein	2.99594	2.77343	4.71223	NA	3.2838	3.50938	3.53825	4.1546	5.73417	6.26557	3.14709	3.79729	4.42344	6.1151	7.7894
aPF07_0126_1	aPF07_0126_1::PF07_0126::hypothetical protein	0.222921	0.257511	0.429775	1.14554	2.1281	0.250581	0.268187	0.34763	0.754751	1.07946	0.234118	0.236947	0.354765	0.53894	0.708978
aPF11_0213_3	aPF11_0213_3::PF11_0213::hypothetical protein	0.590669	0.593936	0.651677	0.398565	0.355005	NA	0.586902	0.597754	0.294143	0.391915	0.428841	0.534052	0.502291	0.330834	0.835331
aPFL0465c_0	aPFL0465c_0::PFL0465c::Zinc finger transcription factor (krox1)	1.68823	1.75273	2.15398	2.03214	2.02392	1.85131	2.03926	2.03349	1.87314	2.30757	1.90108	1.93609	1.99511	2.8281	2.92249
aPFE0860c_1	aPFE0860c_1::PFE0860c::hypothetical protein	0.542393	0.583553	0.627447	0.729347	0.918383	0.589676	0.54933	0.777222	0.35879	0.940934	0.597676	0.50827	0.503462	0.757718	1.136
aPF07_0055_1	aPF07_0055_1::PF07_0055::hypothetical protein	0.383367	0.430915	0.413197	0.432457	NA	0.278008	0.435318	0.768743	NA	NA	NA	0.368312	NA	1.11523	0.476162
aPFB0920w_0	aPFB0920w_0::PFB0920w::hypothetical protein	0.401825	0.41534	0.30097	0.395854	0.611613	0.460022	NA	0.390024	0.407275	0.559155	0.408581	0.399004	0.385207	0.554948	0.595495
aPFL2425w_0	aPFL2425w_0::PFL2425w::adaptor-related protein complex 3, sigma 2 subunit, putative	1.41136	1.09442	0.976878	0.65343	0.623189	1.58826	1.34741	1.098	0.908288	0.695987	1.32817	1.27436	0.94604	0.807076	0.452763
aPFF0120w_0	aPFF0120w_0::PFF0120w::putative geranylgeranyltransferase	0.548073	0.53475	NA	0.398565	0.229596	0.474982	0.56099	0.641561	0.281214	0.319276	0.608932	0.592982	0.405111	0.312158	0.265574
aPFE1045c_0	aPFE1045c_0::PFE1045c::hypothetical protein	1.23529	1.1858	NA	0.850001	0.727375	1.77277	1.33057	1.00756	1.07475	0.751734	1.38895	1.32469	0.999898	0.865772	0.555717
aPFC1120c_3	aPFC1120c_3::PFC1120c::var (3D7-varT3-2)	0.440162	0.381074	0.30097	0.249442	0.21802	0.387715	0.281143	0.462093	0.155152	0.288868	0.221737	0.164512	0.229485	0.150743	0.131032
aPFF0770c_1	aPFF0770c_1::PFF0770c::hypothetica protein with PP2C domain	0.702839	1.24602	2.44475	4.43438	5.92512	1.20055	1.28263	1.53325	1.21536	1.767	0.687721	1.12581	1.53966	2.31317	2.17139
aPFF0385c_0	aPFF0385c_0::PFF0385c::hypothetical protein	NA	0.651045	0.68611	0.824244	0.710011	0.435089	0.608927	0.782874	0.528488	0.910527	0.511007	0.712069	0.631083	0.641659	0.471482
aPFC0640w_0	aPFC0640w_0::PFC0640w::CTRP protein	0.23144	NA	0.193845	0.166747	0.416745	0.234375	0.23191	0.293931	NA	0.273665	NA	0.244313	0.261098	0.442891	0.806082
aPFL1335w_1	aPFL1335w_1::PFL1335w::hypothetical protein	3.02576	2.90323	2.87835	2.35614	1.90622	3.09798	3.18974	3.39293	3.42143	2.93429	2.97262	3.25342	3.34509	3.63785	3.41737
aPFB0370c_0	aPFB0370c_0::PFB0370c::RNA-binding protein, putative	0.394726	0.431954	0.377488	0.31587	0.501638	0.478722	0.395155	0.374479	0.316769	0.35644	0.431092	0.423558	0.378182	0.434887	0.446914
aMAL8P1.105_0	aMAL8P1.105_0::MAL8P1.105::hypothetical protein	1.12454	1.06742	1.06998	0.679188	0.565307	1.32023	1.22563	0.873314	0.638387	0.510165	1.12782	1.15527	0.708359	0.630987	0.754605
aPFA0350c_0	aPFA0350c_0::PFA0350c::hypothetical protein	0.655983	0.62301	0.548378	NA	0.528649	0.826544	0.589493	0.616125	0.407275	0.549019	0.81491	0.639634	0.462482	0.739042	0.408306
aPFD0975w_1	aPFD0975w_1::PFD0975w::unknown	NA	0.822373	0.781758	0.624961	0.764033	0.593416	0.752737	0.710804	0.578589	0.533815	0.778892	0.545101	0.766901	0.859102	0.914886
aPFL1425w_0	aPFL1425w_0::PFL1425w::t-complex protein 1, gamma subunit, putative	0.749695	0.607435	0.637649	0.50973	0.534437	0.781664	0.715165	0.569491	0.431517	0.415565	0.666336	0.713297	0.469507	0.448227	0.404796
aPF10_0286_0	aPF10_0286_0::PF10_0286::hypothetical protein	0.282556	0.280355	0.316274	0.220973	0.208373	0.347822	0.272074	0.238819	0.18586	0.19089	0.263383	0.262729	0.200214	0.200102	0.452763
aPF14_0650_0	aPF14_0650_0::PF14_0650::hypothetical protein	1.95517	1.60217	1.77266	1.28924	0.993629	1.73412	1.82678	1.90066	1.97334	1.4359	1.45423	1.51376	1.80778	2.2358	2.21702
aPFA0620c_1	aPFA0620c_1::PFA0620c::glutamic acid-rich protein (garp)	1.28925	1.40281	1.48955	1.01539	0.964688	1.7067	1.62596	1.1404	0.78061	0.922352	1.08505	1.42045	1.12635	0.634989	0.657501
aPF14_0217_0	aPF14_0217_0::PF14_0217::hypothetical protein	1.02799	1.03627	1.00621	0.866269	0.655988	1.15193	1.11291	0.905816	0.819398	0.660512	0.99275	1.05828	1.01629	0.977829	0.887978
aPFI0260c_0	aPFI0260c_0::PFI0260c::hypothetical protein	1.01521	1.60321	1.10313	1.07911	1.29268	1.24293	1.13105	1.2803	0.97455	1.68929	1.03665	1.25103	1.43311	2.72938	9.44719
aPF11_0094_0	aPF11_0094_0::PF11_0094::hypothetical protein	1.29919	1.43292	1.91422	1.75423	3.64073	1.29654	1.51843	2.07306	2.78466	4.33303	1.32142	1.63408	NA	2.51861	2.89441
aPF11_0127_0	aPF11_0127_0::PF11_0127::hypothetical protein	1.63854	1.94275	1.70507	2.17177	2.55257	1.99717	2.04444	2.11263	2.77496	3.63028	1.88532	2.19145	2.76201	3.59516	2.79847
aPFI0690c_1	aPFI0690c_1::PFI0690c::hypothetical protein	1.42414	1.71847	3.11555	5.77242	7.57666	1.67428	1.93691	2.97323	4.82265	5.86859	1.07492	1.41923	2.88378	3.70455	6.72944
aPF08_0018_0	aPF08_0018_0::PF08_0018::Translation initiation factor like protein	NA	0.884674	0.92204	0.698167	0.71194	1.04845	0.983352	0.854944	0.712731	0.709501	0.702354	0.971115	0.935502	0.879113	0.653991
aPFL0415w_0	aPFL0415w_0::PFL0415w::acyl carrier protein, mitochondrial precursor, putative	0.975455	1.01135	0.906737	0.542266	0.513214	1.17437	0.998899	0.778635	0.568892	0.57098	0.858808	0.988303	0.755192	0.510926	0.356829
aPF11_0395_6	aPF11_0395_6::PF11_0395::guanylyl cyclase	2.98032	2.41936	3.4331	3.27257	2.07408	2.51953	3.46181	3.99774	3.97901	3.20458	4.0194	3.82307	3.67761	3.5458	2.47089
aMAL13P1.170_0	aMAL13P1.170_0::MAL13P1.170::hypothetical protein	0.444421	0.493216	0.554755	0.525998	0.542155	0.496176	0.466412	0.395676	0.45576	0.574358	0.512133	0.502131	0.450774	0.654999	0.822462
aPFD1060w_4	aPFD1060w_4::PFD1060w::u5 small nuclear ribonucleoprotein-specific protein, putative	0.773833	0.870137	0.803438	0.538199	0.590389	0.903838	0.822699	0.801245	0.609296	0.599698	0.944351	1.00549	0.782122	0.621649	0.5136
aMAL13P1.1_2	aMAL13P1.1_2::MAL13P1.1::	0.543813	0.405995	0.543277	0.416189	0.299053	0.320395	0.305759	0.486117	NA	0.322654	0.181216	0.352351	0.317298	0.421547	0.16379
aMAL7P1.167_0	aMAL7P1.167_0::MAL7P1.167::hypothetical protein	2.71622	2.52111	4.04269	4.05072	4.60542	3.54803	3.39185	3.65859	4.5172	4.48337	2.725	3.36514	4.50423	3.938	2.70137
aPFC0600w_0	aPFC0600w_0::PFC0600w::hypothetical protein	0.521095	0.583553	0.582811	0.420256	0.503567	0.519863	0.617996	0.552534	0.496164	0.489894	0.62469	0.604031	0.530391	0.576292	0.617724
aPFI1055w_0	aPFI1055w_0::PFI1055w::hypothetical protein	0.364908	0.32085	0.318825	0.302313	0.333782	0.407662	0.354991	0.409808	0.168082	0.251704	NA	0.394093	0.283344	NA	0.327581
aPFD0735c_1	aPFD0735c_1::PFD0735c::hypothetical protein	0.6929	0.808875	0.677183	0.511085	0.362723	0.878904	0.950962	0.774395	0.494548	0.478069	0.775516	0.993213	0.865252	0.520264	0.664521
aPFD0255w_1	aPFD0255w_1::PFD0255w::Plasmodium yoelii blood stage membrane protein ag-1	2.16531	2.26256	2.21264	2.78182	2.57186	2.34375	2.46291	2.25818	2.80405	3.51541	2.10031	2.44559	2.12625	2.79875	2.56566
aPFL2405c_4	aPFL2405c_4::PFL2405c::PFG377 protein	0.502636	0.790184	0.527973	0.451436	1.19043	0.546043	0.647795	1.03441	0.597983	1.22305	NA	NA	0.917939	0.667005	1.03071
aPFF0365c_1	aPFF0365c_1::PFF0365c::conserved hypothetical protein, EXS family	0.427383	0.64793	0.70779	0.359251	0.40131	0.278008	0.601153	0.760264	0.284446	0.353061	1.00063	0.721891	0.675575	0.450895	0.424685
aPF10_0064_0	aPF10_0064_0::PF10_0064::hypothetical protein	0.69148	0.658314	0.651677	0.645296	0.582672	0.770444	0.831768	0.691021	0.539801	0.533815	0.703479	0.773454	0.632254	0.516262	0.496051
aPFF1325c_0	aPFF1325c_0::PFF1325c::c3h4-type ring finger protein, putative	2.36126	2.15146	2.6743	2.13517	1.92938	2.42104	2.2906	2.20166	2.45496	1.80416	1.98663	2.32527	2.54073	2.31718	1.68119
aPF14_0140_0	aPF14_0140_0::PF14_0140::hypothetical protein	1.3787	1.65201	1.79817	2.85638	3.10437	1.38879	1.6143	1.75652	2.60688	3.12687	1.40358	1.66477	1.79958	2.72938	2.34103
aPF14_0450_1	aPF14_0450_1::PF14_0450::hypothetical protein	0.935699	1.07469	0.841697	0.911006	0.642483	1.25914	1.10125	0.967994	0.812934	0.706123	0.966862	1.14299	0.86291	0.789734	1.06347
aPFF0520w_1	aPFF0520w_1::PFF0520w::calcium-dependent protein kinase	1.28215	1.31455	1.172	0.936764	0.810338	1.16065	1.35778	1.48803	1.49981	1.48657	1.10868	1.50517	1.48111	1.87295	2.50131
aPF10_0104_0	aPF10_0104_0::PF10_0104::hypothetical protein	1.29777	1.23875	1.02151	0.782218	0.785256	1.50349	1.39146	1.12203	0.945459	0.765248	1.1492	1.30628	1.09591	0.989835	0.68675
aPF13_0088_0	aPF13_0088_0::PF13_0088::Myb1 protein	1.10466	1.03108	0.765179	0.757816	0.748598	1.20429	1.09348	0.941145	0.745054	0.723016	0.973615	1.08284	0.745826	0.973827	0.994441
aPF13_0013_1	aPF13_0013_1::PF13_0013::PBS lyase HEAT-like repeat domain protein	0.511156	0.481794	0.484613	0.486683	0.735093	0.572223	0.476777	0.476225	0.444447	0.555776	0.58642	0.451795	0.419161	0.486914	0.551037
aPFD0980w_1	aPFD0980w_1::PFD0980w::holo-(acyl-carrier protein) synthase, putative	0.448681	0.501523	0.466759	0.50024	NA	0.431349	0.555808	0.488943	0.374951	0.420633	0.464859	0.510725	0.442578	0.504256	1.26821
aPF13_0188_0	aPF13_0188_0::PF13_0188::hypothetical protein	1.37444	1.4973	1.15414	0.997769	1.02836	1.82513	1.72572	1.86816	1.32526	1.05074	1.07604	1.97169	1.71528	1.23663	0.988592
aPF11_0507_3	aPF11_0507_3::PF11_0507::antigen 332, putative	0.333671	0.362384	0.484613	0.451436	0.409028	0.413895	0.38479	0.387198	0.404043	0.375022	0.329791	0.395321	0.465995	0.394867	0.663351
aPF14_0564_1	aPF14_0564_1::PF14_0564::hypothetical protein, conserved	0.611967	0.61055	0.503743	0.455503	0.532508	0.600896	0.507871	0.671237	NA	0.54564	0.544774	0.677693	0.47302	0.59897	0.822462
aMAL13P1.96_0	aMAL13P1.96_0::MAL13P1.96::chromosome segregation protein, putative	1.59594	1.6894	1.48317	1.12927	NA	1.96351	1.94727	1.94729	1.50789	1.27372	1.53865	1.82437	1.67782	1.47675	1.57473
aPF07_0021_1	aPF07_0021_1::PF07_0021::hypothetical protein	1.97647	2.15458	2.27768	1.5807	1.40459	2.46841	2.28931	2.98029	1.89254	2.13357	1.80879	2.69236	3.38022	3.10024	2.97396
aPFL1490w_0	aPFL1490w_0::PFL1490w::hypothetical protein	0.237119	0.225322	0.327752	0.409411	0.665635	0.275515	0.237093	0.243058	0.329699	0.488205	0.229616	0.232036	0.240022	0.290814	0.467972
aPFI1720w_0	aPFI1720w_0::PFI1720w::hypothetical protein	0.0539553	0.0529558	0.085445	0.19386	0.335712	0.0486202	0.0466412	0.0621777	0.0905055	0.16724	0.0607806	0.0429697	0.0632254	0.158747	0.303012
aPF10_0106_0	aPF10_0106_0::PF10_0106::hypothetical protein	0.590669	0.71127	0.70524	0.649363	0.765963	0.499916	0.647795	0.678302	0.610912	0.670648	0.592048	0.635951	0.620546	0.669673	0.801403
aPF10_0266_0	aPF10_0266_0::PF10_0266::hypothetical protein	0.367748	0.347847	0.413197	0.45008	0.586531	0.428856	0.37313	0.350456	0.363638	0.449351	0.303903	0.35849	0.337202	0.550946	1.31032
aMAL13P1.21_0	aMAL13P1.21_0::MAL13P1.21::hypothetical protein	1.84726	1.52637	2.01497	1.86539	1.60717	1.88622	2.0276	2.066	2.29658	2.23831	1.57917	1.78017	2.00448	2.57597	2.52003
aPF10_0363_1	aPF10_0363_1::PF10_0363::pyruvate kinase, putative	0.603448	0.665582	0.566232	0.578869	0.582672	0.448802	0.66075	0.593515	0.557579	0.567601	0.728242	0.750128	0.467166	0.432219	0.408306
aMAL13P1.121_0	aMAL13P1.121_0::MAL13P1.121::hypothetical protein	2.91075	2.35186	1.8071	1.26755	1.40073	3.23636	2.77774	2.22285	1.49334	1.28893	3.05366	3.29393	2.04663	1.36202	0.742906
aPFC0221c_0	aPFC0221c_0::PFC0221c::hypothetical protein	0.741176	0.638585	0.672082	0.588358	0.740881	0.559756	0.628361	NA	0.622225	0.692608	0.697852	0.654367	0.66855	0.951149	1.10909
aPF11_0108_1	aPF11_0108_1::PF11_0108::hypothetical protein, conserved	1.17708	0.986432	1.12226	1.05064	1.05923	1.16065	1.09866	1.22801	1.04243	1.01357	0.966862	0.958838	0.979994	1.05253	0.972213
aPFF0045c_0	aPFF0045c_0::PFF0045c::RIFIN pseudogene	0.238539	NA	NA	NA	NA	NA	NA	NA	NA	NA	NA	NA	NA	0.176089	NA
aMAL13P1.246_2	aMAL13P1.246_2::MAL13P1.246::hypothetical protein	0.322312	0.368614	0.355808	0.467704	NA	0.352808	0.383494	0.730588	0.371719	0.844645	0.496375	0.359718	0.465995	0.752382	1.85785
aPF10_0079_5	aPF10_0079_5::PF10_0079::hypothetical protein	1.28073	1.45057	1.79052	1.77863	1.5628	1.37383	1.50936	1.68586	1.74385	1.73828	1.36081	1.5334	1.87335	1.72087	1.29043
aMAL8P1.68_1	aMAL8P1.68_1::MAL8P1.68::hypothetical protein	0.993914	0.932438	0.691212	1.28381	1.88886	0.774184	0.906912	1.14181	1.06829	NA	0.879068	0.931828	1.00458	2.41856	4.30184
aPFE1350c_0	aPFE1350c_0::PFE1350c::ubiquitin-conjugating enzyme, putative	1.3929	1.30417	1.67192	1.2323	0.951183	1.61195	1.4096	1.3128	1.42546	1.2619	1.29328	1.36152	1.22119	1.33134	1.11494
aPF08_0072_0	aPF08_0072_0::PF08_0072::hypothetical protein	0.46146	0.455836	0.468034	0.700878	1.21165	0.270528	0.413293	0.661345	0.45576	1.4359	NA	0.392866	0.38989	0.612311	0.565077
aMAL7P1.207_1	aMAL7P1.207_1::MAL7P1.207::	1.76349	2.52942	NA	2.53645	1.81747	2.16547	2.66373	2.95909	2.89779	2.50015	2.22412	2.70341	2.64376	3.8126	4.36384
aPFE1160w_0	aPFE1160w_0::PFE1160w::hypothetical protein	1.94949	1.91056	1.36329	1.25941	1.42195	2.35247	2.07942	1.69434	1.42223	1.39197	2.16221	2.28108	1.7305	1.38604	0.84586
aMAL7P1.89_1	aMAL7P1.89_1::MAL7P1.89::hypothetical protein	0.538133	NA	NA	0.832378	1.95832	0.594663	0.829177	NA	0.95354	1.73997	NA	NA	1.10996	1.22329	1.84381
aPF11_0115_0	aPF11_0115_0::PF11_0115::hypothetical protein	0.770993	0.792261	0.932243	0.786285	0.767892	0.893865	0.811039	0.804071	0.720812	0.652066	0.67534	0.801691	0.766901	0.789734	0.773324
aPFF0810c_0	aPFF0810c_0::PFF0810c::hypothetical protein	NA	0.829642	0.720543	0.745615	0.843138	0.885138	0.818812	0.741893	0.597983	0.721326	0.886947	0.993213	0.885156	1.55012	1.00263
aPF13_0254_5	aPF13_0254_5::PF13_0254::hypothetical protein	1.50649	1.66759	1.69487	1.37193	1.38529	1.17312	1.73479	1.65478	1.56445	1.47644	1.69736	1.78263	1.77031	1.34735	1.53378
aPF11_0109_0	aPF11_0109_0::PF11_0109::hypothetical protein	0.6929	0.642739	0.553479	0.544977	0.586531	0.710604	0.640021	0.586449	0.473538	0.488205	0.607806	0.574566	0.457799	0.544276	0.699619
aPF10_0245_1	aPF10_0245_1::PF10_0245::glucosamine--fructose-6-phosphate aminotransferase, putative	1.31907	1.61671	1.86576	1.66747	2.22457	1.62192	1.9667	2.00099	1.94102	1.91565	1.488	2.11656	1.97053	1.52344	1.95846
aPFE1410c_0	aPFE1410c_0::PFE1410c::hypothetical protein	2.73894	3.40267	2.69853	3.87855	5.97142	2.06698	NA	3.15411	4.47033	5.71149	2.61582	2.85564	3.05238	4.89982	3.99882
achr5tRNAArg1_0	achr5tRNAArg1_0::chr5-tRNA-Arg-1::(tRNA) tRNA-Arg	0.521095	NA	NA	NA	0.302912	0.246841	NA	0.635908	NA	0.533815	0.521138	0.531596	0.590104	0.667005	NA
aPFI0330c_0	aPFI0330c_0::PFI0330c::hypothetical protein	0.454361	0.585629	0.487164	0.366029	0.426392	0.415142	0.483255	0.477638	0.381416	0.391915	0.503128	0.509498	0.419161	0.465569	0.735887
aPF08_0033_0	aPF08_0033_0::PF08_0033::hypothetical protein, conserved	0.670182	0.791223	0.608317	NA	0.810338	0.57347	0.702209	0.924187	0.719196	1.12169	0.741749	0.779593	0.981165	1.19127	1.16642
aPF13_0138_0	aPF13_0138_0::PF13_0138::hypothetical protein, conserved	0.34787	0.332272	0.359634	0.416189	0.636694	0.387715	0.304463	0.368827	0.357174	0.393604	0.361307	0.287283	0.299735	0.420213	0.483181
aPFL0765w_0	aPFL0765w_0::PFL0765w::hypothetical protein	2.53164	2.29268	2.5608	1.71491	1.23673	2.79878	2.89305	2.46733	1.93617	1.36326	2.38508	2.60642	2.20118	1.34068	1.24013
aMAL13P1.83_0	aMAL13P1.83_0::MAL13P1.83::hypothetical protein	0.717038	NA	0.763903	0.551755	0.524791	0.931265	0.812334	0.620364	0.572124	0.501719	0.6956	0.740306	0.689625	0.76839	0.666861
aPF14_0539_0	aPF14_0539_0::PF14_0539::hypothetical protein	0.744016	0.701925	0.668256	0.380942	0.459192	0.497423	0.783831	0.821028	0.43475	0.513544	0.902705	0.902363	0.75168	0.695019	0.940625
aPFF0910c_1	aPFF0910c_1::PFF0910c::hypothetical protein	1.38012	1.41735	0.79196	0.585647	0.580742	1.39752	1.31114	0.934079	0.720812	0.581115	1.52965	1.38362	0.987019	0.799072	0.490201
aPFI1045w_0	aPFI1045w_0::PFI1045w::hypothetical protein	0.756794	0.671812	0.821292	NA	0.740881	0.609623	0.645203	NA	NA	0.511855	0.66521	0.526685	0.559662	0.654999	0.521789
aPFL1085w_1	aPFL1085w_1::PFL1085w::hypothetical protein	5.80162	7.87485	6.00538	7.22569	12.3789	7.66205	8.08318	8.86456	7.11923	9.92795	6.49902	9.554	12.2985	7.97871	5.96899
aPFE0005w_2	aPFE0005w_2::PFE0005w::erythrocyte membrane protein 1 (PfEMP1)	0.443002	NA	0.432326	NA	0.466909	0.59591	NA	0.753198	NA	0.337858	0.312908	0.272551	NA	NA	NA
aPFC0940c_1	aPFC0940c_1::PFC0940c::hypothetical protein	0.660243	1.33532	1.10568	1.46818	2.35384	1.03225	1.86435	1.63923	1.68243	2.49846	1.15821	1.96187	1.84759	1.50877	1.27405
aPFB0405w_2	aPFB0405w_2::PFB0405w::transmission-blocking target antigen s230 precursor	1.35882	1.56687	1.39263	1.34075	1.90237	1.38007	1.67908	1.89783	1.78425	2.07951	1.68835	1.72001	2.06068	1.65684	2.11758
aPFL1345c_0	aPFL1345c_0::PFL1345c::hypothetical protein, conserved	0.322312	0.29593	0.357083	0.45957	0.627048	0.331615	0.335558	0.322194	0.353941	0.440904	0.325289	0.330253	0.36179	0.364185	0.418835
aPF08_0063_0	aPF08_0063_0::PF08_0063::hypothetical protein	0.751115	0.801606	0.973052	0.629028	0.584601	0.811584	0.865453	0.705152	0.599599	0.54564	0.721488	0.864304	0.690796	0.570956	0.886808
aMAL8P1.61_1	aMAL8P1.61_1::MAL8P1.61::hypothetical protein	2.73042	2.56369	1.95503	1.44785	1.33706	2.63422	2.86714	2.28786	2.14951	1.8768	2.31754	2.92194	2.25504	2.42123	1.5408
aPF14_0319_3	aPF14_0319_3::PF14_0319::hypothetical protein	1.71805	2.34459	2.60543	1.45192	1.38336	2.3986	2.60932	2.63266	2.01698	1.74166	2.60456	2.51434	2.39788	1.8356	1.7818
aPF08_0135_0	aPF08_0135_0::PF08_0135::hypothetical protein, conserved	0.389046	0.334349	0.506293	0.523286	0.594248	0.413895	0.395155	0.37024	0.480002	0.473001	0.384944	0.383044	0.402769	0.490916	0.389587
aMAL8P1.131_0	aMAL8P1.131_0::MAL8P1.131::Gas41 homologue	0.773833	0.700886	0.654228	0.508374	0.478485	0.643283	0.719052	0.576557	0.484851	0.45104	0.766511	0.757494	0.556149	0.530936	0.50658
aPFL0235w_0	aPFL0235w_0::PFL0235w::hypothetical protein	1.38296	NA	0.997283	NA	0.657918	1.33269	1.24377	1.12344	0.749903	0.667269	NA	1.26945	0.867593	NA	0.749926
aMAL7P1.108_0	aMAL7P1.108_0::MAL7P1.108::hypothetical protein	1.42272	1.50976	1.95121	2.16093	2.25544	1.65808	1.6169	1.87381	2.62304	3.22654	1.56116	1.666	1.80778	2.44257	2.77625
aPF10_0122_0	aPF10_0122_0::PF10_0122::phosphoglucomutase, putative	0.962677	0.890904	0.68356	0.542266	0.480415	0.999832	0.795492	0.57797	0.538185	0.625037	0.936472	0.906046	0.617033	0.728369	0.496051
aMAL13P1.107_2	aMAL13P1.107_2::MAL13P1.107::hypothetical protein	NA	0.33331	0.239756	0.281978	0.426392	NA	NA	NA	0.260203	0.440904	0.3962	0.321659	0.454286	0.321496	0.486691
aPF11_0287_0	aPF11_0287_0::PF11_0287::hypothetical protein	1.20832	1.25225	1.85556	3.25359	4.53597	1.09832	1.13623	1.56433	3.05618	3.20289	0.999504	1.0767	1.52912	2.27049	2.44048
aPFB0485c_1	aPFB0485c_1::PFB0485c::hypothetical protein	0.34077	0.374844	0.485889	0.607337	1.15184	0.388962	0.423658	0.414047	0.484851	0.780452	0.361307	0.365856	0.392232	0.720365	0.806082
aMAL13P1.155_0	aMAL13P1.155_0::MAL13P1.155::hypothetical protein	0.326572	0.377959	0.232104	0.313158	0.304842	0.214428	0.400337	0.416873	0.20687	0.258461	NA	0.430924	0.316127	0.26947	0.17432
aMAL13P1.167_0	aMAL13P1.167_0::MAL13P1.167::signal peptidase, putative	2.0432	2.44116	1.75609	0.912362	0.889443	2.14054	2.30226	1.72119	1.14586	0.939245	1.981	1.96433	1.58181	1.17126	0.84235
aPF14_0585_0	aPF14_0585_0::PF14_0585::ribosomal protein S28e, putative	1.09756	0.942822	0.862101	0.676476	0.61933	1.3115	1.00408	0.787113	0.783842	0.633483	0.953355	1.16386	0.615862	0.605641	0.439894
aMAL8P1.113_6	aMAL8P1.113_6::MAL8P1.113::hypothetical protein	1.32475	1.47134	1.2957	1.03844	0.922242	1.28657	1.55212	1.67597	1.10869	1.03722	1.54878	1.66722	1.45301	1.18727	0.894997
aPF10_0219_1	aPF10_0219_1::PF10_0219::hypothetical protein	0.410344	0.429877	0.457832	0.513797	0.982053	0.406415	0.414588	0.508727	0.441214	0.73653	0.391697	0.438291	0.41799	0.48558	0.561567
aPFI1495w_0	aPFI1495w_0::PFI1495w::hypothetical protein	0.410344	0.454797	0.460383	0.342983	0.40324	0.380235	0.463821	0.436657	0.370103	0.344615	0.391697	0.44934	0.419161	0.336171	0.319391
aPF14_0052_0	aPF14_0052_0::PF14_0052::hypothetical protein, conserved	0.394726	0.410148	0.437427	0.345694	0.410957	0.446309	0.415884	0.404155	0.297375	0.324343	0.462608	0.4653	0.362961	0.333502	0.276104
aPFF1445c_0	aPFF1445c_0::PFF1445c::cullin-like protein, putative	0.898782	0.83068	0.767729	0.657497	0.611613	0.947471	1.00926	0.908643	0.825863	0.778762	0.90383	0.977253	0.892181	1.07388	0.707808
aPF14_0175_0	aPF14_0175_0::PF14_0175::hypothetical protein	1.00243	1.1723	1.52526	1.22145	1.28689	1.24917	1.22433	1.39052	1.259	1.12169	1.06704	1.05828	1.28207	1.16326	1.4086
aPFD1210w_0	aPFD1210w_0::PFD1210w::hypothetical protein	0.484178	NA	0.593014	NA	0.436039	0.519863	0.445683	0.67265	NA	NA	NA	NA	NA	NA	NA
aPFF1595c_0	aPFF1595c_0::PFF1595c::erythrocyte membrane protein 1 (PfEMP1)	NA	0.259588	0.280566	NA	NA	0.233128	0.194338	0.592101	NA	0.305761	NA	0.105583	0.168601	0.0947147	0.125183
aPFE1325w_6	aPFE1325w_6::PFE1325w::hypothetical protein	0.815009	0.996816	0.864652	0.729347	1.02064	0.951212	0.941893	1.2803	0.793539	1.45617	1.11994	1.26576	1.56073	2.0397	1.43785
aPF14_0339_0	aPF14_0339_0::PF14_0339::hypothetical protein	0.783772	0.945937	0.586637	0.671054	0.875937	0.578456	0.873227	0.934079	0.68364	0.947691	0.931969	0.794325	0.951894	1.31133	1.05996
aMAL13P1.148_0	aMAL13P1.148_0::MAL13P1.148::P. falciparum myosin	1.55477	1.48588	2.09149	1.67831	1.58402	1.73163	1.71795	1.67315	1.54344	1.76869	1.43172	1.72001	1.90379	2.12108	2.86516
aPF10_0079_3	aPF10_0079_3::PF10_0079::hypothetical protein	1.14442	1.11726	1.69997	1.59155	1.50684	1.37259	1.3228	1.43433	1.45132	1.56766	1.21899	1.24244	1.40384	1.20861	2.09067
aPF14_0031_0	aPF14_0031_0::PF14_0031::hypothetical protein	0.783772	NA	0.646576	0.584291	0.750528	0.471242	NA	0.856357	0.33778	1.1352	NA	0.660505	0.620546	0.521598	NA
aMAL7P1.92_2	aMAL7P1.92_2::MAL7P1.92::cysteine repeat modular protein 2 homologue	NA	0.557594	0.417022	0.39721	0.783327	0.311668	0.393859	0.7857	0.242426	0.685851	NA	0.327797	0.560833	0.469572	0.473822
aPF11_0350_0	aPF11_0350_0::PF11_0350::hypothetical protein	1.58458	1.59698	1.47169	1.04928	0.833491	1.83386	1.74645	1.68162	1.18304	0.788898	1.24713	1.71142	1.38862	0.916465	1.12079
aPF07_0095_0	aPF07_0095_0::PF07_0095::hypothetical protein, conserved	0.569371	0.61055	0.503743	0.50024	0.613542	0.410155	0.542852	0.524271	0.504245	0.579426	0.588672	0.568427	0.464824	0.458899	0.436384
aPF13_0161_0	aPF13_0161_0::PF13_0161::hypothetical protein	0.550912	0.82445	1.43343	3.88533	7.32392	0.57347	0.671115	1.26475	2.81698	3.99686	0.411958	0.572111	1.15796	2.33985	5.78882
aPF14_0326_9	aPF14_0326_9::PF14_0326::hypothetical protein	0.542393	0.544095	0.614694	0.699523	0.895231	0.613363	0.550625	0.601993	0.547882	0.719637	0.507631	0.518091	0.47302	0.509592	0.668031
aPF07_0040_0	aPF07_0040_0::PF07_0040::lysophospholipase-like protein, putative	2.81704	2.88973	2.8911	2.62185	1.67277	3.07056	2.76608	2.83756	3.06264	2.41737	2.49088	2.84336	2.83461	2.52528	1.77479
aPFC0510w_1	aPFC0510w_1::PFC0510w::zinc finger protein, putative	1.53347	1.77246	1.34927	1.0764	1.038	2.04704	1.74127	2.09567	1.51758	1.38184	NA	1.92995	2.09932	1.79291	1.46007
aPFL1665c_0	aPFL1665c_0::PFL1665c::hypothetical protein	0.736916	0.753842	0.831494	0.551755	0.536367	0.880151	0.724234	0.707978	0.651317	0.488205	0.714735	NA	0.645133	0.701689	0.704298
aMAL7P1.64_0	aMAL7P1.64_0::MAL7P1.64::hypothetical protein	0.864705	0.932438	1.22174	0.980145	1.24252	1.07962	1.00408	0.99767	1.00041	0.886877	0.943225	0.922006	0.818418	0.696353	0.659841
aPF13_0170_0	aPF13_0170_0::PF13_0170::glutaminyl-tRNA synthetase, putative	0.752535	0.690503	0.706515	0.585647	0.472697	0.765457	0.69314	0.628843	0.661014	0.650376	0.712484	0.758722	0.70953	0.827086	0.903187
aPF11_0168_3	aPF11_0168_3::PF11_0168::hypothetical protein	2.90507	2.99252	4.49543	4.49267	3.96487	3.2027	3.25322	3.79001	4.74992	4.92428	2.66422	3.21168	3.78065	3.25232	2.36326
aMAL8P1.2_1	aMAL8P1.2_1::MAL8P1.2::hypothetical protein with DNAJ domain	0.242799	0.190018	0.207874	0.23453	0.314488	0.248088	0.229319	0.248711	NA	NA	0.172212	NA	NA	0.212108	0.17198
aPF07_0118_7	aPF07_0118_7::PF07_0118::hypothetical protein	1.90831	2.2906	1.71145	1.52648	1.202	2.10314	2.31651	2.09285	1.45779	1.46124	1.56229	2.39034	2.52433	1.84494	0.794383
aPFI1495w_1	aPFI1495w_1::PFI1495w::hypothetical protein	0.367748	0.340579	0.374938	NA	0.362723	0.589676	0.38479	0.354696	0.289294	0.287179	0.382693	0.360945	0.310273	0.2628	0.281953
aPFL2060c_0	aPFL2060c_0::PFL2060c::rabGDI protein	1.3645	1.26471	1.53928	1.31364	0.771751	1.32272	1.3215	1.25345	1.48688	1.10142	1.26401	1.22402	1.2727	1.28198	1.09974
aPFF1035w_1	aPFF1035w_1::PFF1035w::Pfs77 protein	0.983975	0.91271	0.679734	0.620894	NA	0.949965	0.844724	0.62319	0.513942	0.924041	0.948853	0.875354	0.7107	1.39004	1.95729
aPFA0505c_0	aPFA0505c_0::PFA0505c::DNA-directed RNA polymerase 2 subunit, putative	0.667342	0.551364	0.576435	0.513797	0.528649	0.65949	0.550625	0.590688	0.58667	0.57098	0.514384	0.525458	0.498778	0.621649	0.486691
aMAL13P1.142_0	aMAL13P1.142_0::MAL13P1.142::hypothetical protein	1.22109	1.14842	0.913113	0.917785	0.833491	0.784157	1.09866	1.02876	1.03273	0.937555	1.40358	1.16141	1.0479	1.10856	0.649312
aPFE0155w_1	aPFE0155w_1::PFE0155w::hypothetical protein	1.59168	1.70809	2.10679	1.70678	1.29654	1.6506	1.89156	1.96142	1.67758	1.3717	1.65008	1.76298	2.1321	NA	1.2413
aPFE0205w_0	aPFE0205w_0::PFE0205w::ATP-dependent helicase, putative	1.40284	1.33947	1.42961	1.94809	2.29596	1.16564	1.32409	1.52053	1.75839	2.08627	1.5364	1.37748	1.43428	1.68085	1.09389
aPF07_0037_0	aPF07_0037_0::PF07_0037::Cg2	0.775253	0.675966	0.535625	0.488039	0.457262	0.767951	0.682775	0.618951	NA	0.440904	NA	0.788187	0.6264	0.59897	0.524129
aPF07_0049_2	aPF07_0049_2::PF07_0049::erythrocyte membrane protein 1 (PfEMP1)	0.873224	0.990586	1.00111	1.16587	1.1557	0.65949	1.04813	1.29443	1.4093	1.63523	1.03102	1.05214	1.27856	1.30333	1.06932
aPFA0765c_1	aPFA0765c_1::PFA0765c::erythrocyte membrane protein 1 (PfEMP1)	0.337931	0.269971	0.302246	NA	NA	0.376495	0.338149	0.579383	NA	0.322654	NA	NA	0.249389	NA	0.156771
aPFL1865w_1	aPFL1865w_1::PFL1865w::hypothetical protein	0.81217	0.91894	0.951372	0.690033	0.819985	0.944978	0.914686	0.934079	NA	NA	0.886947	1.09634	0.984677	0.856434	1.15004
aPF10_0326_0	aPF10_0326_0::PF10_0326::hypothetical protein	1.02373	0.877406	0.756252	0.73477	0.690717	1.05469	1.09348	0.917121	0.787075	0.608144	0.967988	0.971115	0.83598	0.760386	0.644632
aPFC0570c_0	aPFC0570c_0::PFC0570c::hypothetical protein	1.06775	1.01966	1.38497	0.982856	1.13061	1.15193	1.12457	1.12909	0.908288	1.01526	1.09743	1.07179	1.00575	1.06721	1.07634
aPF11_0114_0	aPF11_0114_0::PF11_0114::actin, putative	2.03042	1.65928	1.57882	1.43565	1.62646	0.559756	1.34741	1.5389	1.36082	0.90377	1.9326	1.22279	1.1884	1.30066	1.12898
aPF11_0015_0	aPF11_0015_0::PF11_0015::hypothetical protein	0.0979715	NA	NA	NA	NA	NA	NA	NA	NA	NA	0.127189	NA	NA	NA	NA
aPF11_0179_0	aPF11_0179_0::PF11_0179::hypothetical protein	1.8217	1.79115	1.70125	1.43565	1.34285	1.8563	1.84751	1.6251	1.98304	1.66564	1.4925	1.7593	1.46589	1.33134	1.08687
aMAL8P1.50_0	aMAL8P1.50_0::MAL8P1.50::hypothetical protein	1.02089	0.81822	0.77028	0.494817	0.68107	1.00981	0.897843	0.696673	0.617377	0.560844	1.05015	0.880264	0.669721	0.581628	NA
aPF08_0113_0	aPF08_0113_0::PF08_0113::vacuolar proton translocating ATPase subunit A	1.1146	1.0965	1.55586	2.18669	2.82075	1.33145	1.25543	1.38063	2.05738	2.66063	1.13907	1.33697	1.46121	1.9063	2.17958
aMAL13P1.37_0	aMAL13P1.37_0::MAL13P1.37::hypothetical protein	2.89371	2.50346	2.87835	2.54458	1.47597	NA	2.71167	2.65103	3.99032	3.71813	2.69348	2.80653	2.69996	5.15728	6.22403
aPFL1275c_0	aPFL1275c_0::PFL1275c::hypothetical protein	1.07201	1.17749	1.13757	0.778151	0.785256	1.21675	1.17899	1.05137	1.02142	0.820994	0.99275	1.18719	1.17904	0.971159	0.772154
aPF10_0026_1	aPF10_0026_1::PF10_0026::hypothetical protein	0.445841	0.420532	0.475686	0.403988	0.466909	NA	0.426249	0.39709	0.383032	NA	0.375939	0.384272	0.37584	0.561618	0.650482
aPFD0110w_1	aPFD0110w_1::PFD0110w::reticulocyte binding protein, putative	0.654563	0.9314	2.59141	8.32107	16.7759	0.572223	0.738486	1.61945	4.45578	7.03589	0.560532	0.714524	1.40267	2.39188	3.13892
aPFL0015c_0	aPFL0015c_0::PFL0015c::rifin	NA	0.160944	0.139007	NA	0.165926	0.129654	NA	0.282626	NA	0.14359	NA	0.164512	0.174455	0.170753	NA
aPF14_0381_0	aPF14_0381_0::PF14_0381::delta-aminolevulinic acid dehydratase	0.763894	0.815105	0.823843	0.502951	0.598107	1.16689	0.925051	0.85777	0.618993	0.550708	0.881319	0.822562	0.613521	0.560284	0.910206
aPF13_0308_1	aPF13_0308_1::PF13_0308::DNA helicase	2.08864	2.02582	2.75592	2.21244	1.68242	1.82887	2.25173	2.23557	2.3386	2.19608	2.27927	2.28967	2.46228	2.28249	1.53963
aPFF0965c_0	aPFF0965c_0::PFF0965c::hypothetical protein	0.755375	0.848332	0.959024	0.761883	0.758245	1.06092	0.877114	0.866249	0.670711	0.723016	0.763134	1.03741	0.843006	0.621649	0.964023
aPF11_0191_0	aPF11_0191_0::PF11_0191::hypothetical protein	NA	0.545134	0.587912	0.616827	0.638624	0.58843	0.542852	0.57797	0.635155	0.780452	0.547026	0.581932	0.667379	1.07655	0.875108
aPFF0745c_3	aPFF0745c_3::PFF0745c::ribonuclease, putative	1.42414	1.5596	1.47807	0.970655	0.854714	1.47357	1.57155	1.39617	1.21536	1.00344	1.497	1.53954	1.6743	1.47008	1.432
aPF10_0380_0	aPF10_0380_0::PF10_0380::trophozoite antigen R45, putative	0.258418	0.242974	0.325201	0.508374	0.638624	0.311668	0.272074	0.284039	0.433134	0.501719	0.252127	0.201344	0.223631	0.26947	0.327581
aPFL0765w_1	aPFL0765w_1::PFL0765w::hypothetical protein	2.03042	1.99052	1.22939	0.852713	0.98977	2.26146	2.11829	2.33166	1.76486	1.49671	1.5893	2.31913	1.49048	1.60882	0.491371
aMAL8P1.154_2	aMAL8P1.154_2::MAL8P1.154::hypothetical protein	0.611967	0.751765	0.826393	0.820177	1.10939	0.835271	0.726825	0.715044	0.682024	0.805791	0.661833	0.757494	0.824272	0.872443	1.24247
aPFB0075c_0	aPFB0075c_0::PFB0075c::hypothetical protein	0.0539553	NA	0.0204048	0.0230463	0.03087	0.0324135	0.0246162	0.0296757	0.0177779	NA	NA	0.0171879	0.0187335	0.0240122	0.016379
aPFE0890c_0	aPFE0890c_0::PFE0890c::hypothetical protein	0.35071	0.468296	0.371112	0.254865	0.422534	0.306682	0.330375	0.539816	0.265052	0.466244	NA	0.416192	0.366473	0.663003	2.44048
aPFL1660c_1	aPFL1660c_1::PFL1660c::hypothetical protein	0.354969	0.381074	NA	0.318581	NA	0.188248	0.411997	0.48753	0.253739	0.479758	0.294899	0.332708	0.40394	0.765722	1.13015
aPFE0250w_3	aPFE0250w_3::PFE0250w::hypothetical protein	1.63144	1.62709	1.87214	1.35024	1.00713	1.95852	1.9084	1.90631	1.49496	1.25683	1.61406	2.05518	2.16723	1.72888	0.968703
aPF14_0109_0	aPF14_0109_0::PF14_0109::hypothetical protein	1.76207	1.52949	1.42961	1.71627	1.59559	1.92362	1.75423	1.4103	1.57577	1.39704	NA	1.71142	1.39916	1.14858	0.971043
aPF11_0202_1	aPF11_0202_1::PF11_0202::clathrin coat assembly protein, putative	0.758214	0.584591	0.317549	NA	0.266254	0.229388	0.365356	0.659932	0.344244	0.434147	1.14583	NA	0.624058	0.717697	0.300672
aPFB0910w_0	aPFB0910w_0::PFB0910w::hypothetical protein	0.293915	0.291776	0.313723	0.882537	2.30175	0.235621	0.234502	0.463507	0.767681	1.84977	0.263383	0.265184	0.282173	0.600304	0.387247
aPF13_0226_1	aPF13_0226_1::PF13_0226::hypothetical protein, conserved	NA	1.86176	1.35564	1.65255	2.3249	1.11079	1.57285	1.69576	NA	3.05086	1.70298	1.95573	2.01268	2.98418	2.83357
aPF11_0207_1	aPF11_0207_1::PF11_0207::hypothetical protein	0.535294	0.548249	0.576435	0.563956	0.785256	0.718084	0.658159	0.542642	0.478386	0.695987	0.411958	0.550012	0.536245	0.509592	0.591985
aPFI0285w_1	aPFI0285w_1::PFI0285w::hypothetical protein	0.846247	1.06327	0.964125	0.966588	1.14798	0.827791	0.866749	0.833747	0.80162	1.14703	0.716986	0.952699	0.923794	1.04186	1.58643
aPFF1045w_2	aPFF1045w_2::PFF1045w::hypothetical protein, conserved	0.594928	0.566939	0.497366	0.425679	0.443757	0.331615	0.606336	0.501661	0.386265	0.420633	0.641573	0.581932	0.50112	0.448227	0.553377
aMAL13P1.80_0	aMAL13P1.80_0::MAL13P1.80::hypothetical protein	1.11886	1.15672	NA	1.37871	1.66119	1.03723	1.02611	1.12061	1.49819	1.67746	1.04228	1.04846	1.27153	1.41005	1.09389
aPFD0320c_2	aPFD0320c_2::PFD0320c::hypothetical protein	1.85152	NA	1.66426	1.63629	1.97568	1.86502	2.7311	2.75984	1.79718	2.93429	NA	2.86301	2.85685	1.65817	1.46943
aPFF0845c_3	aPFF0845c_3::PFF0845c::erythrocyte membrane protein 1 (PfEMP1)	0.330831	0.134985	0.102024	NA	0.117692	0.152094	0.117899	0.137074	NA	0.0726394	0.422088	NA	0.0819589	0.138737	0.156771
aPFL1955w_2	aPFL1955w_2::PFL1955w::erythrocyte membrane protein 1 (PfEMP1)	NA	0.179635	0.14921	NA	NA	0.155834	NA	0.250124	NA	0.157104	NA	0.0613853	0.0679088	0.0867106	0.0713658
aPF14_0350_0	aPF14_0350_0::PF14_0350::hypothetical protein	1.96511	2.112	1.87724	1.54546	1.02257	2.27393	2.10922	1.58412	1.78425	1.58962	1.69623	2.16076	1.94125	2.22913	1.62386
aPF14_0582_0	aPF14_0582_0::PF14_0582::hypothetical protein	0.768153	0.709193	0.665706	0.631739	0.630906	0.926278	0.81363	0.723523	0.504245	0.555776	0.901579	0.768543	0.686113	0.74171	1.07166
aPFD0720w_0	aPFD0720w_0::PFD0720w::hypothetical protein	1.21967	1.43085	2.39118	5.06883	8.64554	1.13821	1.20231	1.96566	4.63033	6.5139	0.984871	1.28418	2.03726	3.72322	4.10412
aPF10_0267_1	aPF10_0267_1::PF10_0267::hypothetical protein	0.731237	0.675966	0.673357	0.444658	0.482344	0.69315	0.59338	0.536989	0.423437	0.562533	0.613434	0.730485	0.601812	0.589632	0.613044
aPFE1040c_0	aPFE1040c_0::PFE1040c::hypothetical protein	0.722717	NA	0.62107	0.481261	0.407099	0.665723	0.742373	0.794179	0.504245	0.442594	0.741749	0.63104	0.592446	0.574958	NA
aPF11_0042_0	aPF11_0042_0::PF11_0042::hypothetical protein	NA	NA	0.221902	NA	NA	0.249335	0.1762	0.262842	NA	NA	NA	0.193977	0.159234	0.278808	0.156771
aPF14_0664_1	aPF14_0664_1::PF14_0664::biotin carboxylase subunit of acetyl CoA carboxylase, putative	2.28316	2.7537	1.99967	2.13246	2.7648	2.83992	2.89953	2.76408	2.45173	2.98666	2.97825	3.26447	3.89422	4.12609	3.59871
aPF11_0461_0	aPF11_0461_0::PF11_0461::rab6	1.95943	1.67486	1.73058	1.55495	1.18657	2.18666	1.89933	1.9162	2.02829	1.57611	1.92022	1.96556	1.57478	1.55279	1.1477
aPFD0690c_1	aPFD0690c_1::PFD0690c::hypothetical protein	0.69148	0.756957	0.631273	0.566668	0.524791	0.514876	0.743668	0.877554	0.520407	0.550708	0.791274	0.798008	0.649817	0.584296	0.298332
ac5rRNA28s_1	ac5rRNA28s_1::c5rRNA28s::	1.21825	1.29482	1.68339	1.58884	1.52807	1.36511	1.09736	1.0655	1.36405	1.08283	1.26401	1.02882	1.13454	0.872443	0.981572
aPF11_0181_1	aPF11_0181_1::PF11_0181::tyrosine --tRNA ligase, putative	1.329	1.04354	0.964125	0.677832	0.630906	1.47855	1.19972	1.07963	0.78061	0.848023	1.41146	1.25471	0.782122	1.58881	2.45218
aPFC0080c_1	aPFC0080c_1::PFC0080c::hypothetical protein	0.195943	0.190018	0.234655	0.344339	0.470768	0.208194	0.189156	0.180881	0.205254	0.290558	0.212732	0.195205	0.187335	0.268136	0.326411
aPF14_0216_1	aPF14_0216_1::PF14_0216::hypothetical protein	2.64949	2.14419	1.83133	1.80574	1.72486	2.70653	2.18695	2.33449	2.32405	2.66908	1.5454	2.48365	2.04312	2.61866	2.19596
aMAL8P1.90_0	aMAL8P1.90_0::MAL8P1.90::hypothetical protein	0.421703	0.519175	0.417022	0.363318	0.486203	0.56599	0.51694	0.805484	NA	0.505097	0.350051	0.324114	0.400428	0.261466	0.186019
aPFF0450c_0	aPFF0450c_0::PFF0450c::transporter protein, putative	1.1927	1.21383	1.29443	1.15503	1.22708	1.12325	1.23988	1.11637	1.38506	1.48657	1.26626	1.17246	1.08303	1.18994	1.03188
aPFI0370c_0	aPFI0370c_0::PFI0370c::subunit of proteaseome activator complex, putative	1.23955	1.17853	1.06742	0.977434	0.891372	1.15816	1.03647	1.00474	1.05859	0.898702	1.08392	1.06933	0.991702	1.09255	0.770985
aPF07_0067_0	aPF07_0067_0::PF07_0067::hypothetical protein	0.329411	NA	0.327752	0.30638	0.449545	0.369015	0.321306	0.391437	0.265052	0.38009	0.253253	0.316748	0.297394	0.338839	0.236326
aPF10_0224_6	aPF10_0224_6::PF10_0224::dynein heavy chain, putative	NA	0.190018	NA	NA	0.285548	0.219414	0.22025	0.260016	NA	0.199336	NA	0.298332	0.405111	NA	0.444574
aPF08_0089_0	aPF08_0089_0::PF08_0089::hypothetical protein	1.45253	1.37893	1.40793	1.05742	0.810338	1.4424	1.59357	1.55303	1.31395	1.26021	1.36756	1.5555	1.7305	1.58747	1.42849
aPFF0770c_2	aPFF0770c_2::PFF0770c::hypothetica protein with PP2C domain	1.01521	1.63021	1.47552	0.925919	0.974335	NA	1.65447	1.47531	1.20081	1.15547	1.47224	1.76421	1.4214	1.13791	1.1828
aPFL1070c_0	aPFL1070c_0::PFL1070c::endoplasmin homolog precursor, putative	2.01339	1.85449	2.00349	1.18621	0.98977	2.26894	2.00168	1.86674	1.42869	1.02709	1.92585	2.04045	1.55839	1.23663	1.2647
aPF08_0139_0	aPF08_0139_0::PF08_0139::rifin	0.147667	0.107988	0.182368	NA	0.18522	0.133394	0.1762	0.175228	0.137374	0.244947	0.192472	0.158374	0.255243	0.224114	0.155601
aPF11_0357_2	aPF11_0357_2::PF11_0357::hypothetical protein	1.01379	NA	0.887607	1.39091	1.76345	0.627077	1.15696	1.65901	NA	2.59137	1.09855	1.23139	1.70357	2.54396	1.70225
aPFC0705c_3	aPFC0705c_3::PFC0705c::hypothetical protein	2.57708	2.98941	2.29171	1.6512	1.34671	2.41481	2.68316	2.45743	1.81496	NA	2.49426	2.65675	2.72221	1.73421	1.2179
aPF13_0258_0	aPF13_0258_0::PF13_0258::sexual stage-specific protein kinase	1.89696	2.21895	1.91422	NA	1.63804	2.0059	2.48883	2.50265	3.00446	2.89713	2.23875	2.49838	2.97394	3.55514	NA
aPFE0245c_1	aPFE0245c_1::PFE0245c::hypothetical protein	0.367748	0.41534	0.295869	0.324004	0.428322	0.340342	0.387381	0.371653	0.284446	0.359819	0.374814	0.416192	0.422674	0.461567	0.319391
aPFF1145c_2	aPFF1145c_2::PFF1145c::protein kinase, putative	0.188844	0.187941	0.293319	0.657497	1.4316	0.168301	0.218955	0.268495	0.496164	0.898702	0.194723	0.219759	0.330177	0.448227	0.560397
aPF11_0466_0	aPF11_0466_0::PF11_0466::transport protein, putative	0.817849	0.721653	0.721819	0.498884	0.443757	0.885138	0.741077	0.723523	0.431517	0.368265	0.612308	0.77591	0.525708	0.540274	0.85288
aMAL7P1.211_0	aMAL7P1.211_0::MAL7P1.211::	0.600608	0.794338	0.720543	0.886604	0.756316	NA	0.527305	0.900164	0.512326	0.530437	0.344423	0.399004	0.585421	0.533604	0.608364
aMAL7P1.29_3	aMAL7P1.29_3::MAL7P1.29::hypothetical protein	0.797971	1.03212	0.87868	0.866269	1.22515	0.785404	1.11939	1.22518	0.972934	1.61665	NA	1.12212	1.23407	1.29799	1.30564
aPFD0285c_1	aPFD0285c_1::PFD0285c::amino acid decarboxylase, putative	0.538133	0.531635	0.70779	0.638518	0.754386	0.435089	NA	0.683955	0.507477	0.723016	0.468236	0.545101	0.565516	0.883115	2.26499
aPFE1530c_1	aPFE1530c_1::PFE1530c::hypothetical protein, conserved	0.424543	0.418455	0.408095	0.385009	0.409028	0.502409	0.4405	0.399916	0.33778	0.393604	0.425464	0.421103	0.393403	0.373523	0.51009
aPF08_0025_0	aPF08_0025_0::PF08_0025::hypothetical protein	0.724137	0.817181	0.573884	0.615471	0.729304	0.645777	0.765693	NA	0.60768	0.707812	0.700103	0.813968	0.697821	0.57229	0.308862
aPF10_0222_0	aPF10_0222_0::PF10_0222::hypothetical protein	1.23245	1.21072	1.08273	0.927274	1.24059	1.02851	1.16992	1.21953	1.099	0.981477	1.23587	1.14054	0.955406	0.937809	0.775664
aPF13_0297_0	aPF13_0297_0::PF13_0297::hypothetical protein, conserved	1.1146	0.790184	0.7486	0.577513	0.704223	1.07339	0.862862	0.756025	0.64162	0.657133	0.856556	0.785731	0.625229	0.729703	0.778004
aPF14_0691_1	aPF14_0691_1::PF14_0691::hypothetical protein	1.63428	1.7517	2.24835	3.31324	3.56163	1.83136	1.99391	2.10132	3.07234	3.01031	1.70861	1.87716	2.14966	1.70353	1.30798
aPFC0680w_1	aPFC0680w_1::PFC0680w::hypothetical protein	1.05497	1.12765	1.29698	NA	1.82519	1.11203	1.18417	1.29725	1.56607	1.76869	NA	1.2805	1.34764	1.97033	2.12108
aPF14_0481_1	aPF14_0481_1::PF14_0481::hypothetical protein, conserved	0.509736	0.508792	0.441253	0.319937	0.335712	0.532329	0.488437	0.452202	0.273133	0.320965	0.57629	0.546329	0.41799	0.474908	0.33343
aPF14_0360_0	aPF14_0360_0::PF14_0360::hypothetical protein	0.792291	0.714385	0.714167	0.702234	0.657918	0.716837	0.738486	0.675476	0.785459	0.907148	0.786771	0.691198	0.772755	1.15392	1.02135
aPFL1670c_1	aPFL1670c_1::PFL1670c::hypothetical protein	1.79188	1.83269	1.37605	0.807976	0.704223	2.1929	1.72832	1.98121	0.859802	0.908837	2.12732	2.12884	1.60405	0.780396	0.641122
aPF14_0088_1	aPF14_0088_1::PF14_0088::hypothetical protein	1.46673	1.69147	1.39263	0.74426	0.814197	1.63813	1.70629	1.53042	1.0198	0.988234	1.68047	1.72493	1.40267	0.957819	0.742906
aPF11_0466_1	aPF11_0466_1::PF11_0466::transport protein, putative	0.770993	0.910633	0.812365	0.456859	0.439898	1.02227	0.941893	0.799832	0.543033	0.484826	0.862184	0.912185	0.721238	0.546944	0.832991
aPFI0495w_4	aPFI0495w_4::PFI0495w::hypothetical protein	1.96653	2.0767	2.21519	1.76779	1.16727	2.35871	2.26858	2.85594	2.22708	1.60989	1.59043	2.08955	2.31709	1.90763	1.69055
aPF10_0044_0	aPF10_0044_0::PF10_0044::hypothetical protein	1.47525	1.36647	1.81475	1.48852	1.37758	1.88622	1.6156	1.75935	1.51112	1.56935	1.46436	1.68073	1.94477	1.64617	1.70459
aPF11_0092_0	aPF11_0092_0::PF11_0092::hypothetical protein	0.837727	1.12453	1.31611	1.06284	1.31776	0.918798	0.914686	0.97506	NA	1.10311	0.742874	0.79187	0.97414	1.29399	1.78882
aMAL8P1.42_0	aMAL8P1.42_0::MAL8P1.42::hypothetical protein	1.08337	0.998893	1.21918	0.817465	0.781398	1.1993	1.12457	1.07822	0.955157	0.751734	1.05015	1.09389	1.05142	0.871109	0.762795
aPFD0725c_0	aPFD0725c_0::PFD0725c::arsenical pump-driving ATPase, putative	1.19838	0.992663	1.25234	0.864914	0.814197	1.23047	1.07145	0.983538	0.788691	0.738219	1.1492	1.05214	0.950723	0.752382	0.67622
aPF11_0016_0	aPF11_0016_0::PF11_0016::hypothetical protein	0.326572	0.342656	0.45018	0.543621	0.956971	0.402675	0.387381	0.517206	0.287678	0.918973	0.227365	0.294649	0.282173	0.268136	0.223457
aMAL13P1.238_0	aMAL13P1.238_0::MAL13P1.238::hypothetical protein	0.675861	0.615742	0.422124	0.300957	0.451474	0.374002	0.608927	0.46068	0.342628	0.456108	0.812659	0.597892	0.408624	0.641659	2.07312
aPFL1585c_1	aPFL1585c_1::PFL1585c::hypothetical protein	0.435902	0.455836	0.502467	0.414833	0.474627	0.453789	0.463821	0.470572	0.32485	0.347994	0.578541	0.515636	0.408624	0.440223	0.324071
aPF14_0440_1	aPF14_0440_1::PF14_0440::hypothetical protein	NA	0.913748	1.23831	2.01587	3.59829	0.922538	0.922459	1.13757	1.91031	2.46298	0.934221	1.10125	1.24226	1.39004	1.16408
aMAL8P1.144_2	aMAL8P1.144_2::MAL8P1.144::hypothetical protein	0.826368	1.1183	1.94993	4.43438	7.79082	0.903838	1.05979	1.7	4.05659	4.56108	0.818287	1.01777	1.66611	2.93616	3.25007
aPFD0145c_0	aPFD0145c_0::PFD0145c::hypothetical protein	0.850506	0.896096	0.734572	0.683255	0.654059	0.876411	0.969101	0.943971	0.672327	0.611523	0.96236	0.753811	0.915598	0.851098	0.666861
aMAL7P1.50_1	aMAL7P1.50_1::MAL7P1.50::erythrocyte membrane protein 1 (PfEMP1)	0.069574	NA	NA	NA	NA	NA	NA	NA	NA	0.0337858	NA	NA	NA	0.0560284	NA
aPFL1175w_1	aPFL1175w_1::PFL1175w::hypothetical protein	0.337931	0.346809	0.331577	0.357895	0.530579	0.289228	0.326488	0.334912	0.339396	0.440904	NA	0.332708	0.300906	0.560284	0.961683
aPFB0440c_0	aPFB0440c_0::PFB0440c::hypothetical protein	0.776673	0.70504	0.849348	0.904228	1.15377	0.668217	0.697027	0.739067	0.785459	0.907148	0.698977	0.676465	0.674404	1.02585	0.734717
aPF10_0127_1	aPF10_0127_1::PF10_0127::hypothetical protein	1.46247	1.52222	1.24979	1.49665	1.33706	1.43367	1.48475	1.42161	2.0089	1.9714	1.36644	1.53586	1.58415	2.06772	1.7549
aMAL13P1.243_0	aMAL13P1.243_0::MAL13P1.243::elongation factor Tu, putative	0.681541	0.645854	0.59939	0.584291	0.553731	0.710604	0.72553	0.67265	0.491316	0.560844	0.668587	0.647001	0.613521	0.701689	0.638782
aPFD0250c_2	aPFD0250c_2::PFD0250c::hypothetical protein	1.56328	1.67382	2.39884	NA	1.36793	1.7628	1.83455	1.73674	1.78748	1.55246	1.74801	1.85015	1.86983	1.92764	3.07809
aPF11_0084_0	aPF11_0084_0::PF11_0084::hypothetical protein	0.726977	0.807836	0.711616	0.561245	0.491991	0.819064	0.866749	0.724936	0.623842	0.59294	0.933095	0.83975	0.785634	0.693685	0.747586
aPF14_0084_1	aPF14_0084_1::PF14_0084::hypothetical protein	1.35598	1.45992	1.2753	0.92863	0.939607	1.90492	1.86176	1.78761	1.44486	1.47644	1.4835	1.64635	1.74104	1.62749	1.15706
aPF14_0461_2	aPF14_0461_2::PF14_0461::hypothetical protein	1.93529	2.03205	2.08001	1.54139	1.26953	2.42229	2.10015	2.3896	1.81981	1.41393	2.38395	2.31791	2.64844	2.17444	1.52442
aPF13_0270_0	aPF13_0270_0::PF13_0270::hypothetical protein	0.549492	0.548249	0.57771	0.805264	1.366	0.602143	0.51694	0.576557	0.636771	1.08959	0.507631	0.432152	0.504632	0.602973	0.687919
aPF10_0317_0	aPF10_0317_0::PF10_0317::hypothetical protein	1.85436	1.30832	1.49082	1.02488	0.802621	1.75781	1.68427	1.31845	1.0699	0.853091	1.14583	1.59356	1.1486	0.964489	0.961683
aPF14_0029_3	aPF14_0029_3::PF14_0029::hypothetical protein	0.937119	1.26263	1.49975	1.95622	3.44201	0.882644	1.02481	1.25486	1.67758	2.26703	1.00738	1.09389	1.39564	1.33534	1.51155
aPF14_0471_0	aPF14_0471_0::PF14_0471::hypothetical protein	1.36308	1.41631	1.4768	1.20654	0.922242	1.35513	1.44069	1.37356	1.61779	1.09128	1.27414	1.41186	1.33125	1.60348	1.43317
aPFC0010c_0	aPFC0010c_0::PFC0010c::rifin	0.123529	0.0976049	NA	NA	NA	NA	NA	NA	NA	NA	NA	0.115404	NA	0.113391	NA
aPFD1250w_1	aPFD1250w_1::PFD1250w::	NA	0.211823	0.158137	0.132855	0.387805	NA	0.2643	0.528511	NA	0.305761	NA	NA	0.421503	0.444225	NA
aPF11_0252_2	aPF11_0252_2::PF11_0252::hypothetical protein	0.983975	1.15984	1.21281	0.649363	0.519002	1.40251	1.19453	0.980712	0.675559	0.418944	1.05128	1.16386	0.930819	0.617647	0.975722
aPF14_0152_1	aPF14_0152_1::PF14_0152::hypothetical protein	1.17282	1.25225	1.22939	0.902872	NA	1.20429	1.37592	1.17148	NA	0.834509	1.1402	1.40327	1.3289	1.06721	1.26236
aPFL0690c_0	aPFL0690c_0::PFL0690c::hypothetical protein	0.604868	0.599128	0.59939	0.284689	0.378158	0.486202	0.592084	0.548294	0.294143	0.439215	0.657331	0.677693	0.457799	0.382861	0.388417
aPFL2015w_1	aPFL2015w_1::PFL2015w::hypothetical protein	1.39716	1.48588	1.47807	1.46818	1.29847	1.45985	1.55341	1.93599	1.95395	1.48489	1.37995	1.45729	1.68016	2.02236	1.23428
aPF11_0077_1	aPF11_0077_1::PF11_0077::hypothetical protein	0.536713	0.583553	0.663155	0.557178	0.567237	0.706864	0.64909	0.638735	0.43475	0.525369	0.571788	0.589298	0.64045	0.450895	0.434044
aPF07_0079_0	aPF07_0079_0::PF07_0079::60S ribosomal protein L11a, putative	0.935699	0.716461	0.695037	0.416189	0.356935	1.11453	0.919868	0.585036	0.408891	0.324343	0.781144	0.784503	0.437895	0.388197	0.280783
aMAL7P1.153_0	aMAL7P1.153_0::MAL7P1.153::hypothetical protein	NA	1.06327	0.828944	0.642585	1.00521	1.44115	1.40183	1.39759	0.736974	1.0406	1.04115	1.42659	1.55956	1.5181	0.697279
aPFB0210c_0	aPFB0210c_0::PFB0210c::monosaccharide transporter, putative	0.802231	0.773571	1.00366	1.09673	1.24831	0.941238	0.870636	0.843639	1.07475	1.20277	0.720363	0.805375	0.797343	0.869775	0.933605
aPFL1705w_1	aPFL1705w_1::PFL1705w::hypothetical protein	0.778093	0.891943	0.91949	0.784929	0.735093	0.994845	0.995012	0.956689	0.867883	0.897012	0.778892	0.801691	0.939014	0.825752	1.20503
aPF14_0469_0	aPF14_0469_0::PF14_0469::transcription factor IIIb subunit, putative	0.915821	0.883636	0.882506	0.848646	0.823844	0.73055	0.868045	0.836573	0.707882	0.99668	NA	0.76486	0.846518	1.76756	5.60631
aPFI0540w_0	aPFI0540w_0::PFI0540w::hypothetical protein	0.670182	0.853524	1.56862	4.23781	7.83906	0.632063	0.776058	1.24073	2.90264	3.83469	0.691098	0.854483	1.46472	2.87346	3.37993
aPF14_0094_0	aPF14_0094_0::PF14_0094::hypothetical protein	1.39006	1.79738	1.76756	1.78812	1.27339	1.73911	1.77107	1.83848	1.99435	1.72476	1.61294	1.7372	1.94828	1.75422	1.89295
aPFE1170w_0	aPFE1170w_0::PFE1170w::hypothetical protein	1.36876	1.27094	1.58775	1.99825	2.59308	1.43741	1.34871	1.54455	1.97011	2.0339	1.31354	1.27559	1.38042	1.49943	1.03305
aPF14_0120_0	aPF14_0120_0::PF14_0120::hypothetical protein	1.94097	2.36017	1.97416	2.07688	1.65541	1.93359	2.18955	2.06176	2.14951	1.84301	1.94273	2.14971	1.84056	1.54879	1.64492
aPFL1930w_0	aPFL1930w_0::PFL1930w::hypothetical protein	2.18803	2.43285	2.61691	1.88708	NA	2.02709	2.9384	2.8305	2.59395	1.95282	2.11494	2.3842	3.15542	2.36787	1.87891
aMAL13P1.320_0	aMAL13P1.320_0::MAL13P1.320::hypothetical protein	0.441582	NA	0.343055	NA	0.791045	NA	0.377016	0.665584	0.30384	0.59463	NA	0.573338	0.528049	0.703023	1.04358
aMAL7P1.162_2	aMAL7P1.162_2::MAL7P1.162::dynein heavy chain, putative	0.832048	0.955282	0.706515	0.812043	1.43932	NA	0.844724	1.17007	0.698185	2.1927	0.927467	0.950244	1.23641	2.24114	1.54197
aPFC0920w_0	aPFC0920w_0::PFC0920w::histone H2A variant, putative	2.79148	2.44116	3.63843	3.00686	2.95773	3.11045	2.79459	3.15411	3.87881	3.16573	2.49538	2.71323	2.58522	2.39321	2.25446
aPF14_0293_0	aPF14_0293_0::PF14_0293::hypothetical protein	3.73854	3.97792	3.95087	4.13206	2.87091	3.76495	3.57194	3.88187	5.61296	4.54588	2.72162	4.37554	3.68581	4.16478	3.91693
aPF14_0716_0	aPF14_0716_0::PF14_0716::Proteosome subunit alpha type 1, putative	1.51643	1.34674	0.874854	0.563956	0.449545	1.31773	1.20101	0.898751	0.675559	0.619969	1.25951	1.49412	0.819589	0.697687	0.463293
aPFD0860w_0	aPFD0860w_0::PFD0860w::hypothetical protein	1.74077	1.9116	1.31866	1.34075	2.40207	1.59948	1.91229	1.89642	1.57577	2.56265	1.08054	2.10429	1.85578	2.28383	1.52091
aPFL0435w_1	aPFL0435w_1::PFL0435w::hypothetical protein	1.49371	1.19306	1.18348	0.931341	0.976265	1.28781	1.50547	1.14322	1.00526	0.846334	1.31016	1.36398	1.25046	1.0512	1.11494
aPFD0990w_0	aPFD0990w_0::PFD0990w::ribosome recycling factor, putative	1.31907	1.2969	1.55076	1.28246	2.04128	1.38256	1.30077	1.53466	1.21698	2.066	1.43622	1.34311	1.58064	1.61148	1.11611
aPFI0220w_0	aPFI0220w_0::PFI0220w::prefoldin subunit, putative	1.1785	0.938668	0.735847	0.437879	0.37044	1.21426	0.93412	0.777222	0.575357	0.413876	1.04565	0.972342	0.624058	NA	0.431705
aPF14_0517_0	aPF14_0517_0::PF14_0517::peptidase, putative	0.775253	0.680119	0.777932	0.569379	0.632836	0.792884	0.724234	0.617538	0.528488	0.564223	0.68547	0.639634	0.52922	0.448227	0.407136
aPF11_0474_0	aPF11_0474_0::PF11_0474::hypothetical protein, conserved	0.438742	NA	NA	NA	0.710011	0.787897	NA	0.706565	0.265052	NA	NA	0.644545	0.362961	0.638991	NA
aPF10_0373_0	aPF10_0373_0::PF10_0373::hypothetical protein	0.673022	0.709193	0.646576	0.467704	0.605824	0.834024	0.739781	0.699499	0.512326	0.756801	0.92409	0.864304	0.725921	0.671007	0.641122
aPFE1135w_0	aPFE1135w_0::PFE1135w::hypothetical protein, conserved	1.93245	2.29995	2.43199	1.84641	1.97182	3.0369	2.55749	2.19742	2.07031	2.11161	1.32254	2.83477	2.80182	2.14375	3.4162
aPFL1085w_0	aPFL1085w_0::PFL1085w::hypothetical protein	4.1432	5.40461	3.33745	4.14155	7.9471	5.83318	6.59066	5.63698	4.1875	NA	3.90347	6.64066	7.67135	NA	4.66919
aPFL1245w_1	aPFL1245w_1::PFL1245w::ubiquitin-activating enzyme e1, putative	1.69959	1.55753	1.2651	0.909651	0.846997	1.86876	1.60653	1.55303	1.19273	1.10986	1.47674	1.76667	1.62981	1.7062	1.08804
aMAL7P1.162_5	aMAL7P1.162_5::MAL7P1.162::dynein heavy chain, putative	0.540973	0.954244	0.696313	1.08453	1.12097	0.446309	0.874523	1.24921	0.749903	1.39873	0.861059	1.09143	1.27856	1.16726	1.16993
aPFI0860c_0	aPFI0860c_0::PFI0860c::ATP-dependant RNA helicase, putative	0.519675	0.580438	0.542002	0.389076	0.420604	0.554769	0.50528	0.440897	0.366871	0.373333	0.511007	0.504587	0.419161	0.444225	0.547528
aPF11_0276_1	aPF11_0276_1::PF11_0276::hypothetical protein	0.736916	0.709193	0.780482	1.4126	2.20914	0.716837	0.761806	0.871901	0.691721	1.21629	NA	0.877809	1.03268	0.773726	0.756945
aPFE1525w_1	aPFE1525w_1::PFE1525w::hypothetical protein	0.396146	0.472449	0.23593	NA	NA	0.301695	NA	0.76733	NA	NA	NA	0.516864	0.412136	0.372189	0.438724
aPF07_0064_1	aPF07_0064_1::PF07_0064::hypothetical protein	1.41136	1.16711	1.17072	0.948965	0.605824	1.86004	1.33964	1.39617	0.985864	0.690919	1.62082	1.46097	1.10762	0.803074	0.818952
aPF14_0544_0	aPF14_0544_0::PF14_0544::hypothetical protein	1.32049	1.37893	1.33906	1.29873	0.983982	1.20055	1.47049	1.53183	1.33172	1.39873	1.31691	1.54936	1.62044	1.87695	1.80403
aPFF0210w_0	aPFF0210w_0::PFF0210w::hypothetical protein	1.41988	1.66032	1.26382	1.19841	0.787186	NA	1.51066	1.30997	1.39475	1.17406	1.46099	1.57146	1.54083	2.27315	4.39309
achr4tRNAAla1_0	achr4tRNAAla1_0::chr4-tRNA-Al-1::	0.23428	0.138101	0.27929	0.187082	0.0983982	0.199468	NA	0.131421	0.114748	0.140211	0.192472	0.110493	0.0901548	0.141405	0.288973
aPF14_0364_1	aPF14_0364_1::PF14_0364::cleavage and polyadenylation specifity factor protein, putative	0.516835	0.496331	NA	0.410766	NA	0.529836	0.4405	NA	0.366871	0.447662	0.641573	0.468983	0.453115	0.586964	0.632933
aPF14_0128_0	aPF14_0128_0::PF14_0128::ubiquitin conjugating enzyme, putative	1.16998	1.26056	1.4972	1.02624	1.10167	1.2554	1.3215	1.13192	1.10384	1.08283	1.5893	1.73966	1.55136	1.2473	1.315
aPFC0560c_0	aPFC0560c_0::PFC0560c::hypothetical protein	0.292495	0.315658	0.307347	0.333493	0.368511	0.281748	0.37313	0.361761	0.260203	0.30914	0.282517	0.340074	0.358277	0.280142	0.242176
aPFB0245c_0	aPFB0245c_0::PFB0245c::DNA-directed RNA polymerase II 16 kDa subunit, putative	0.796551	0.688426	0.845523	0.554467	0.600036	0.718084	0.747555	0.699499	0.625458	0.537194	0.763134	0.743989	0.622887	0.605641	0.631763
aPFL0930w_1	aPFL0930w_1::PFL0930w::clathrin heavy chain, putative	1.47099	1.58141	1.47169	1.06013	0.818056	1.94855	1.71795	1.55868	1.33819	1.05243	1.56341	1.61934	1.88622	1.63816	1.53495
aPF11_0041_0	aPF11_0041_0::PF11_0041::hypothetical protein	0.540973	0.477641	0.392792	0.424323	0.470768	0.417635	0.629656	0.657105	0.300608	0.596319	0.318535	0.455479	0.396915	0.392199	0.379058
aPFL1410c_1	aPFL1410c_1::PFL1410c::hypothetical protein	0.34645	0.407033	0.390241	0.351117	0.383946	0.403922	0.379608	0.29817	0.276365	0.337858	0.359056	0.421103	0.393403	0.438889	0.465633
aPFB0415c_0	aPFB0415c_0::PFB0415c::hypothetical protein	0.795131	0.722692	0.739673	0.569379	0.491991	0.791637	0.719052	0.679716	0.507477	0.430769	0.755255	0.730485	0.659184	0.548278	0.575606
aPFE1395c_0	aPFE1395c_0::PFE1395c::hypothetical protein	2.15253	1.57725	1.50868	1.11436	0.708081	1.95478	1.77107	1.66608	1.28647	0.888566	1.66696	1.66722	1.33008	0.989835	0.558057
aPFF1070c_0	aPFF1070c_0::PFF1070c::osjnba0088k19.13 protein	0.418864	0.420532	0.499917	0.467704	0.482344	0.519863	0.467708	0.455028	0.460608	0.439215	0.441222	0.448112	0.50112	0.553614	0.713658
aPFE0710w_1	aPFE0710w_1::PFE0710w::hypothetical protein	NA	1.84722	1.62345	1.49936	1.29847	1.70545	1.83067	2.07589	1.84405	1.3717	1.70636	1.93732	2.2527	1.62883	1.11026
aPF08_0011_0	aPF08_0011_0::PF08_0011::leucine -- tRNA ligase	0.824948	0.905441	0.803438	0.5504	0.530579	0.848984	0.838246	0.80831	0.596367	0.478069	0.783395	0.805375	0.631083	0.650997	0.491371
aPF10_0234_1	aPF10_0234_1::PF10_0234::hypothetical protein	0.443002	0.476603	0.503743	0.402632	0.625118	0.281748	0.458639	0.601993	0.378184	0.587873	0.492998	0.52423	0.550295	0.454897	0.775664
aPF14_0248_0	aPF14_0248_0::PF14_0248::ubiquinol-cytochrome c reductase hinge protein, putative	2.23347	2.24907	2.36185	1.69729	1.37758	1.99094	2.25951	2.32884	2.14466	1.44772	2.25001	2.01835	1.82768	1.58881	1.15121
aPFI1805w_0	aPFI1805w_0::PFI1805w::rifin	0.326572	0.229475	0.438703	0.412122	0.358864	0.356548	0.313533	0.466333	0.147071	0.33279	NA	0.238175	0.241193	0.146741	0.154431
aPFD0190w_1	aPFD0190w_1::PFD0190w::hypothetical protein	3.32819	2.99149	3.04669	3.58844	3.07929	2.153	3.63283	3.92144	5.057	4.94793	3.59731	4.22699	4.65058	6.8915	5.06229
aPF10_0199_2	aPF10_0199_2::PF10_0199::hypothetical protein	0.682961	0.808875	0.564957	0.542266	NA	0.551029	0.75792	0.90299	0.538185	0.61828	0.742874	0.832384	0.761047	0.557616	0.382567
aPF13_0047_0	aPF13_0047_0::PF13_0047::hypothetical protein	1.27363	1.31663	1.36967	1.08182	0.916454	1.30402	1.51584	1.48237	1.12809	1.05412	1.38557	1.37257	1.53146	1.26598	1.04007
aPF14_0185_0	aPF14_0185_0::PF14_0185::ATP-dependent RNA helicase, putative	0.322312	0.350962	0.373662	0.427034	0.511285	0.364029	0.387381	0.366001	0.350709	0.381779	0.320787	0.376905	0.346569	0.421547	0.721847
aPFI0635c_0	aPFI0635c_0::PFI0635c::hypothetical protein	0.418864	0.366538	0.34433	0.393143	0.430251	0.393949	0.358878	0.344804	0.3798	0.354751	0.440097	0.381816	0.27866	0.361517	0.357999
aPF11_0385_0	aPF11_0385_0::PF11_0385::hypothetical protein	NA	0.689464	0.795786	0.669698	0.642483	0.841504	0.68148	0.715044	NA	0.552397	NA	0.643317	0.617033	0.700355	0.614214
aPFE0615w_0	aPFE0615w_0::PFE0615w::hypothetical protein	0.468559	0.397688	0.417022	NA	0.393593	0.548536	0.419771	0.46492	0.232728	0.42739	NA	0.405143	0.47302	0.596302	1.09038
aPF00_0001_0	aPF00_0001_0::PF00_0001::hypothetical protein	0.376267	NA	NA	NA	0.353076	0.258061	NA	0.341977	NA	0.375022	0.506505	0.4653	0.38989	0.405539	0.148581
aPFF1535w_0	aPFF1535w_0::PFF1535w::hypothetical protein, conserved in P. falciparum	NA	0.104873	0.112226	NA	0.260466	0.134641	0.0971692	0.144139	NA	0.170618	NA	0.0945333	0.096009	0.140071	NA
aPF08_0134_0	aPF08_0134_0::PF08_0134::hypothetical protein	1.67545	1.70601	1.77904	1.25534	1.22515	1.48853	1.53786	1.48096	1.36405	1.2298	1.54653	1.53954	1.48697	1.28198	1.4823
aPF11_0279_0	aPF11_0279_0::PF11_0279::hypothetical protein	0.539553	0.420532	0.714167	0.508374	1.00328	0.706864	0.550625	0.845052	0.630306	1.19264	0.407455	0.67401	0.953065	0.707025	1.06698
aPF11_0416_0	aPF11_0416_0::PF11_0416::myosin heavy chain subunit, putative	1.02799	NA	0.853174	0.906939	1.25024	0.258061	0.860271	1.22801	0.601215	NA	1.03665	1.03987	0.916768	3.10157	9.8087
aPF14_0022_0	aPF14_0022_0::PF14_0022::exopolyphosphatase, putative	0.416024	0.315658	0.378763	0.299602	0.37044	0.410155	0.380903	0.305236	0.276365	0.246636	0.352302	0.373222	0.310273	0.281476	0.381398
aPFI0550w_1	aPFI0550w_1::PFI0550w::hypothetical protein	0.724137	0.700886	0.826393	0.569379	0.584601	0.805351	0.74885	0.633082	0.533336	0.510165	0.768762	0.618763	0.607666	0.649663	1.07985
aPF14_0149_1	aPF14_0149_1::PF14_0149::hypothetical protein	NA	1.84619	1.55969	1.94809	5.74376	1.6693	1.65058	2.75984	2.57456	4.30093	NA	1.9275	2.52785	NA	2.10354
aPF11_0188_1	aPF11_0188_1::PF11_0188::heat shock protein 90, putative	0.427383	0.393535	0.386415	0.370096	0.395522	0.506149	0.424953	0.363174	0.349093	0.400361	0.395074	0.443202	0.364132	0.397535	0.459783
aPFL0295c_1	aPFL0295c_1::PFL0295c::hypothetical protein, conserved	1.14584	1.0965	1.44236	1.2689	1.31584	1.25041	1.15307	1.31421	1.45455	1.68929	1.23587	1.37994	1.49399	2.09039	1.38754
aMAL13P1.26_1	aMAL13P1.26_1::MAL13P1.26::hypothetical protein	0.443002	0.5036	0.610868	0.482616	NA	0.62209	0.599858	0.508727	0.402426	0.408808	0.495249	0.594209	0.57137	0.456231	0.482012
aPF10_0025_1	aPF10_0025_1::PF10_0025::PF70 protein	0.173225	0.147446	0.163238	0.239953	0.493921	0.189494	0.147697	0.151205	0.208486	0.33279	0.178965	0.166968	0.149868	0.265468	0.253875
aPFL0610w_0	aPFL0610w_0::PFL0610w::hypothetical protein	0.315213	NA	0.473136	0.561245	0.636694	0.351562	0.462525	0.594928	0.536568	NA	0.461482	0.50827	0.477703	0.352179	0.559227
aPF14_0210_1	aPF14_0210_1::PF14_0210::hypothetical protein	1.30771	1.21383	1.30208	1.40718	2.11653	1.41497	1.16473	1.56999	1.72607	3.11167	NA	1.27313	1.58883	5.29335	9.9526
aPF11_0508_1	aPF11_0508_1::PF11_0508::hypothetical protein	0.843407	0.802645	0.816191	0.473127	0.474627	1.13447	0.909504	0.761677	0.512326	0.516922	0.749628	0.865532	0.573712	0.397535	0.434044
aPFC0565w_1	aPFC0565w_1::PFC0565w::hypothetical protein	0.589249	0.492178	NA	0.374163	0.445686	0.639543	0.502689	0.634495	0.328083	0.393604	NA	0.459162	0.394573	0.468238	0.315881
aPF14_0179_4	aPF14_0179_4::PF14_0179::hypothetical protein	0.401825	NA	0.386415	0.287401	NA	0.352808	0.360174	0.788527	NA	NA	NA	0.232036	NA	0.57229	0.33577
aPFL2305w_0	aPFL2305w_0::PFL2305w::hypothetical protein, conserved	1.02515	1.05704	0.763903	0.634451	0.58846	0.961185	1.04813	0.946797	0.769297	0.628416	0.971364	1.02759	0.833639	0.817748	0.795553
aPFE0555w_0	aPFE0555w_0::PFE0555w::stearoyl-CoA desaturase (acyl-CoA desaturase, faty acid desaturase), putative	3.10385	2.91776	3.07984	1.87624	1.31969	4.21126	3.60562	3.59924	2.66506	1.78896	3.51064	3.33813	2.80651	1.73021	1.01784
aPFB0820c_2	aPFB0820c_2::PFB0820c::hypothetical protein	1.27789	1.30209	1.31866	1.05742	0.910666	1.44739	1.24247	1.16442	0.871116	1.2146	1.36756	1.47202	1.49516	1.33001	0.997951
aPFC0760c_2	aPFC0760c_2::PFC0760c::hypothetical protein	1.39148	1.4755	1.77011	1.52919	1.85799	1.7628	1.55082	2.03349	1.97173	2.20283	1.49813	1.82928	2.11454	2.10774	1.26119
aMAL13P1.120_0	aMAL13P1.120_0::MAL13P1.120::splicing factor, putative	0.69858	0.630278	0.613418	0.473127	0.436039	0.895111	0.732008	0.707978	0.536568	0.38009	0.562783	0.782048	0.607666	0.53227	0.769815
aPFB0875c_0	aPFB0875c_0::PFB0875c::hypothetical protein	0.494117	0.501523	0.605767	0.660208	0.874008	0.602143	0.519531	0.596341	0.606064	0.672337	0.479492	0.47635	0.489412	0.618981	0.746416
aPF11_0333_1	aPF11_0333_1::PF11_0333::hypothetical protein	1.84158	1.90745	1.79689	1.17943	0.908737	2.12184	2.14161	2.01795	1.43678	1.21291	1.81667	2.00484	1.97755	1.51944	1.10792
aPFL0345w_0	aPFL0345w_0::PFL0345w::hypothetical protein	0.587829	0.826527	0.901636	0.798486	0.983982	0.751744	0.760511	0.723523	0.541417	0.766937	0.760883	0.799236	0.883985	0.819082	1.63088
aPFC0305w_0	aPFC0305w_0::PFC0305w::EB1 homolog, putative	0.853346	0.708155	0.609592	0.516508	0.731234	0.61835	0.69314	0.78994	0.551114	1.25345	NA	0.773454	0.679088	1.07254	0.742906
aPF07_0120_1	aPF07_0120_1::PF07_0120::hypothetical protein	1.86856	2.07566	2.11444	1.61595	1.28304	1.93982	2.3217	2.31895	1.81658	1.56428	1.80203	2.12516	2.13093	1.72621	2.02632
aPF11_0397_0	aPF11_0397_0::PF11_0397::hypothetical protein, conserved	0.833468	0.837948	0.62107	0.466348	0.422534	0.839011	0.835655	0.80831	0.492932	0.442594	0.70573	0.757494	0.655671	0.51893	0.356829
aPF14_0384_0	aPF14_0384_0::PF14_0384::hypothetical protein	0.631845	0.631317	0.688661	0.665631	0.756316	0.408909	0.636134	0.826681	0.707882	1.03553	0.623564	0.683832	0.847689	1.26864	1.74437
aPFL0370w_1	aPFL0370w_1::PFL0370w::hypothetical protein	0.648884	NA	0.66188	0.942186	1.40459	0.436336	0.535078	0.884619	0.609296	1.26697	NA	0.661733	0.832468	1.02852	0.751096
aPFI0175w_1	aPFI0175w_1::PFI0175w::hypothetical protein	0.765314	0.871176	1.79817	4.26356	6.61776	0.873918	0.925051	1.43009	3.27759	4.02389	0.599927	0.820107	1.24577	2.33185	4.01052
aMAL8P1.23_0	aMAL8P1.23_0::MAL8P1.23::ubiquitin-protein ligase 1, putative	0.761054	0.823412	1.00876	0.783574	0.821915	0.951212	0.893956	0.7857	0.824247	0.864916	0.793525	0.968659	1.01395	1.13391	1.20971
aPFC0075c_0	aPFC0075c_0::PFC0075c::hypothetical protein	0.629005	0.564862	0.497366	0.391787	0.410957	0.445062	0.563581	0.491769	0.426669	0.319276	0.602178	0.545101	0.457799	0.48558	0.34162
aPF11_0346_0	aPF11_0346_0::PF11_0346::hypothetical protein	0.745435	0.772532	0.709066	0.543621	0.661776	0.390209	0.782536	0.616125	NA	0.59294	0.714735	0.686287	0.599471	NA	0.802573
aMAL8P1.7_2	aMAL8P1.7_2::MAL8P1.7::hypothetical protein	1.36592	1.57206	1.4819	1.70949	2.75708	1.57579	1.78143	1.98403	1.57738	2.64712	1.9945	1.68441	2.29251	1.95299	3.75665
aMAL13P1.229_0	aMAL13P1.229_0::MAL13P1.229::hypothetical protein	2.0929	1.70912	1.55076	1.01675	0.980124	2.31507	2.01723	1.75087	1.43839	1.13689	1.95173	1.92995	1.44131	1.28332	1.00965
aPF14_0490_0	aPF14_0490_0::PF14_0490::hypothetical protein	0.742596	0.576284	0.580261	0.448725	0.476556	0.796624	0.655568	0.62743	0.513942	0.489894	0.431092	0.627357	0.489412	0.717697	1.2647
aPF08_0011_2	aPF08_0011_2::PF08_0011::leucine -- tRNA ligase	0.759634	0.700886	0.622345	NA	NA	0.974898	0.752737	0.712218	0.441214	0.506787	0.592048	0.710841	0.631083	0.618981	0.50307
aPF14_0710_4	aPF14_0710_4::PF14_0710::hypothetical protein	0.887423	NA	0.784308	0.967944	0.89716	1.09707	1.52491	1.49368	0.864651	0.99837	NA	1.78508	1.44833	0.582962	0.17432
aPF10_0186_1	aPF10_0186_1::PF10_0186::hypothetical protein	2.96186	NA	2.85922	2.43071	NA	1.88372	3.47866	3.81404	3.32931	NA	3.50164	2.97227	3.95042	5.01454	6.4159
aPFL0545w_0	aPFL0545w_0::PFL0545w::kinesin-related protein, putative	NA	NA	0.881231	0.870336	1.31969	0.307928	NA	0.949623	0.68364	1.42407	1.04115	1.16509	1.42374	1.31267	2.1281
aPFD0820w_0	aPFD0820w_0::PFD0820w::hypothetical protein	0.535294	0.60432	NA	0.264354	0.49585	0.382729	0.538965	0.642974	0.310305	0.57098	0.549277	0.635951	NA	0.428217	0.497221
aPFF0310w_0	aPFF0310w_0::PFF0310w::hypothetical protein	0.475659	0.258549	NA	0.29689	0.327994	0.55851	0.406815	0.563839	0.28283	0.336169	NA	0.455479	NA	0.32283	0.283123
aPFL1240c_0	aPFL1240c_0::PFL1240c::hypothetical protein	0.58215	0.62301	0.659329	0.57209	0.46498	0.703124	0.619292	0.610472	0.486467	0.425701	0.513259	0.579477	0.525708	0.564286	0.718338
aPFD0005w_1	aPFD0005w_1::PFD0005w::erythrocyte membrane protein 1 (PfEMP1)	0.332251	0.368614	0.186194	NA	NA	0.269281	0.215068	0.469159	NA	0.199336	0.70573	0.155919	NA	NA	NA
aPFE0735w_2	aPFE0735w_2::PFE0735w::hypothetical protein	0.296754	0.395611	0.266537	NA	0.297124	0.281748	0.395155	0.456441	NA	0.266908	NA	0.419875	0.628742	0.392199	0.445744
aPFE1240w_1	aPFE1240w_1::PFE1240w::hypothetical protein, conserved	0.323732	0.347847	0.40682	0.424323	0.422534	0.386469	0.344627	0.395676	0.342628	0.385158	0.290396	0.29956	0.329006	0.300152	0.572096
aPF11_0127_1	aPF11_0127_1::PF11_0127::hypothetical protein	1.72515	1.96871	2.26365	2.82114	3.03298	2.2116	2.24785	2.67788	3.12891	3.55257	1.68272	2.16444	2.59575	2.90281	4.01169
aPFI1465w_1	aPFI1465w_1::PFI1465w::hypothetical protein	1.00101	0.632355	0.83532	0.54091	0.706152	0.860204	0.926346	0.984952	0.541417	1.03722	NA	0.923234	0.70953	0.913797	0.85522
aPFD1050w_0	aPFD1050w_0::PFD1050w::alpha-tubulin ii	2.84401	2.56888	3.26221	3.59251	4.9257	2.86859	2.8205	2.53939	2.63759	4.01882	2.31079	2.89125	2.65078	3.43107	NA
aPF11_0101_0	aPF11_0101_0::PF11_0101::hypothetical protein	0.411764	0.493216	0.429775	0.383653	0.368511	0.307928	0.424953	0.411221	0.35879	0.415565	0.443473	0.454251	0.408624	0.446893	0.519449
aPF13_0298_2	aPF13_0298_2::PF13_0298::hypothetical protein	NA	0.565901	0.585362	0.494817	0.748598	0.400182	0.607631	0.651453	0.360406	0.768627	0.392823	0.613853	0.638108	0.517596	0.910206
aPF14_0046_0	aPF14_0046_0::PF14_0046::hypothetical protein	0.68864	0.673889	1.05212	1.14689	2.02778	0.800364	0.746259	0.734828	0.898591	1.42914	0.676466	0.686287	0.5983	0.620315	0.979232
aPFD0085c_1	aPFD0085c_1::PFD0085c::ATP-dept. acyl-coa synthetase, putative	0.630425	0.60432	0.966676	NA	10.5691	0.61835	0.677593	1.09235	1.85698	4.98002	0.568411	0.743989	1.08537	1.87962	2.53407
aPF14_0478_1	aPF14_0478_1::PF14_0478::hypothetical protein	0.849086	0.911671	0.81364	0.741548	0.902948	0.772937	0.871931	0.819615	0.901823	1.01526	0.83292	0.902363	0.942527	NA	0.581456
aPFE0195w_1	aPFE0195w_1::PFE0195w::P-type ATPase, putative	0.975455	1.12349	0.94117	0.637162	0.580742	1.27036	1.09348	1.02452	0.703034	0.579426	1.16834	1.51008	1.03971	0.743044	0.836501
aPFC0965w_4	aPFC0965w_4::PFC0965w::hypothetical protein	1.04503	1.28652	1.71783	2.21922	2.60852	1.44739	1.33964	1.69434	2.059	2.77719	NA	1.46465	1.64737	1.68219	1.23779
aPFB0440c_1	aPFB0440c_1::PFB0440c::hypothetical protein	0.724137	0.532674	0.695037	0.828311	0.978194	0.615856	0.610222	0.675476	0.696569	0.802412	0.652829	0.611397	0.677917	1.05654	0.730037
aPFB0720c_0	aPFB0720c_0::PFB0720c::hypothetical protein, conserved	1.10892	1.21902	0.974328	0.955743	0.752457	1.20179	1.27745	1.24214	0.833944	0.812548	1.51839	1.56901	1.63215	1.23796	1.2062
aPFL0985c_0	aPFL0985c_0::PFL0985c::hypothetical protein	0.833468	0.655199	0.665706	0.515152	0.43411	0.895111	0.756624	0.626017	0.536568	0.479758	0.402953	0.746445	0.711871	0.787066	0.868089
aPFL1930w_3	aPFL1930w_3::PFL1930w::hypothetical protein	2.20081	2.2283	2.62839	2.0823	1.52035	2.6978	2.61579	3.31803	2.77012	2.1133	2.09581	2.32282	3.0196	2.01436	1.15823
aPFL1835w_0	aPFL1835w_0::PFL1835w::hypothetical protein	0.673022	0.831718	1.49465	3.01771	4.7945	0.725564	0.86934	1.34954	2.24809	3.64549	0.651703	0.843433	1.33359	1.80492	2.55162
aPF10_0335_0	aPF10_0335_0::PF10_0335::hypothetical protein	1.27789	1.45577	1.40155	0.905584	0.916454	1.07089	1.53268	1.53183	1.11677	1.05918	1.53752	1.5641	1.52326	1.17926	1.11494
aPFL1385c_0	aPFL1385c_0::PFL1385c::101 kd malaria antigen	6.4505	8.04929	7.37377	6.07744	4.19254	6.4266	7.15942	9.28992	7.87721	6.64397	7.69888	8.06848	7.94884	5.37072	2.15735
aPF14_0419_5	aPF14_0419_5::PF14_0419::hypothetical protein	1.63144	1.80984	1.34289	1.32177	1.8059	0.60713	1.6169	1.98403	1.64688	NA	1.7435	1.28295	1.74338	1.61148	0.919566
aPF13_0034_0	aPF13_0034_0::PF13_0034::vacuolar ATP synthase subunit h, putative	1.1998	1.25121	1.02917	0.790352	0.657918	1.02352	1.27227	1.14887	1.13294	0.918973	1.09405	1.12335	1.02566	1.09255	0.773324
aMAL7P1.132_3	aMAL7P1.132_3::MAL7P1.132::hypothetical protein	1.6073	1.63229	1.68594	0.925919	0.916454	1.88248	1.82678	1.84979	1.42869	1.20277	1.00288	1.87839	1.97053	1.3847	1.17578
arps8_0	arps8_0::rps8::	1.6215	1.57414	1.53801	1.28381	1.04958	1.2367	1.04165	0.815376	0.539801	0.537194	1.21224	1.02513	0.827785	0.529602	0.407136
aPF11_0079_0	aPF11_0079_0::PF11_0079::hypothetical protein	0.738336	0.948014	0.85445	0.597848	0.715799	0.804104	0.862862	0.806897	0.602831	0.733151	0.563909	0.890086	0.866422	0.644327	0.558057
aPF14_0622_0	aPF14_0622_0::PF14_0622::hypothetical protein	NA	NA	0.164513	NA	NA	NA	NA	NA	NA	0.304072	NA	0.179245	0.259927	NA	0.455103
aMAL7P1.28_1	aMAL7P1.28_1::MAL7P1.28::hypothetical protein	0.369168	0.40911	0.519046	0.46906	0.490062	0.305435	0.422362	0.450788	0.383032	0.359819	0.373688	0.410053	0.416819	0.581628	0.952324
aPF14_0301_0	aPF14_0301_0::PF14_0301::hypothetical protein	1.07485	1.06016	0.79196	0.65343	0.634765	1.02227	1.04813	0.969407	0.829095	0.748355	1.21561	1.13072	0.968286	0.851098	0.741736
aPFL2125c_1	aPFL2125c_1::PFL2125c::hypothetical protein	0.484178	0.407033	0.480787	0.414833	0.430251	0.532329	0.445683	0.436657	0.436366	0.38009	0.447976	0.450568	0.387548	0.429551	NA
aPFL2235w_1	aPFL2235w_1::PFL2235w::hypothetical protein	1.53773	1.6624	1.63876	1.75694	1.63418	1.97598	1.75941	1.765	1.87961	2.26534	1.76376	1.65249	1.88154	1.53811	1.20269
aPF10_0306_0	aPF10_0306_0::PF10_0306::hypothetical protein	3.21886	2.9811	3.49432	4.38015	3.77579	2.83493	3.48902	4.27331	6.00246	8.86877	2.65859	3.25587	3.25611	6.82213	4.65048
aPF10_0356_0	aPF10_0356_0::PF10_0356::liver stage antigen, putative	0.176065	NA	NA	NA	NA	0.275515	0.185269	0.292518	NA	0.413876	NA	0.190294	NA	0.165417	NA
aPF14_0379_1	aPF14_0379_1::PF14_0379::hypothetical protein	2.28174	2.55123	2.43709	1.71491	1.14991	2.33003	2.75054	2.93931	2.09456	1.90045	2.40534	2.95509	2.99033	2.44924	3.61041
aPFE0165w_0	aPFE0165w_0::PFE0165w::actin depolymerizing factor, putative	2.14827	2.02063	2.6743	3.10583	3.63109	2.30759	2.23619	2.35145	3.07234	3.22823	2.12957	1.94223	1.84642	1.41672	1.19333
aPFL1260w_0	aPFL1260w_0::PFL1260w::hydrolase / phosphatase, putative	0.753955	0.9314	0.902911	0.95981	1.1885	0.706864	0.935415	0.99343	0.945459	1.3565	0.820538	1.02882	1.02449	0.945813	2.29306
aPFA0285c_1	aPFA0285c_1::PFA0285c::hypothetical protein	2.50608	2.74851	3.02118	2.10535	1.93902	2.97456	2.82957	2.76408	2.82183	2.68428	2.40421	2.54994	2.61566	2.59732	2.28371
aPFD0340c_2	aPFD0340c_2::PFD0340c::hypothetical protein	0.249898	0.218053	NA	0.23453	0.600036	0.168301	0.189156	0.286865	NA	0.407119	NA	NA	NA	0.312158	0.3346
aMAL7P1.224_0	aMAL7P1.224_0::MAL7P1.224::	0.252738	NA	NA	NA	NA	NA	NA	NA	NA	NA	NA	NA	0.0971798	NA	NA
aPF13_0148_2	aPF13_0148_2::PF13_0148::hypothetical protein	1.27647	1.25225	0.517771	0.656141	0.752457	1.36386	1.30466	1.23084	0.66263	0.858159	1.39458	1.42905	1.18957	1.01251	0.50775
aPFL1760w_0	aPFL1760w_0::PFL1760w::hypothetical protein	1.33326	1.28963	1.07635	0.864914	0.715799	1.21301	1.34353	1.26334	0.875964	0.648687	1.39908	1.29523	1.1041	1.01251	0.84118
aMAL7P1.37_0	aMAL7P1.37_0::MAL7P1.37::sin3 associated polypeptide p18-like protein, putative	0.817849	0.876367	0.924591	0.760527	0.625118	0.846491	0.865453	0.914295	0.714347	0.581115	0.711358	0.755039	0.762218	0.829754	1.0857
aMAL8P1.112_1	aMAL8P1.112_1::MAL8P1.112::hypothetical protein, conserved	0.80507	0.84314	0.578985	0.610049	1.02643	0.372755	0.691844	0.696673	0.580205	1.00682	0.855431	0.661733	0.736459	1.25664	1.87072
aMAL8P1.78_0	aMAL8P1.78_0::MAL8P1.78::small heat shock protein	0.508316	NA	0.388966	NA	0.725446	0.236868	NA	0.788527	0.431517	0.741598	NA	0.595437	NA	0.697687	0.814272
aPF13_0248_0	aPF13_0248_0::PF13_0248::pf47	NA	NA	1.20898	1.17401	1.92938	0.612116	1.46142	2.36275	1.09253	2.20959	1.85493	2.00975	1.89325	1.33401	1.29043
aPFF0010w_0	aPFF0010w_0::PFF0010w::erythrocyte membrane protein 1 (PfEMP1)	NA	NA	0.0204048	NA	NA	NA	NA	0.0127182	NA	NA	NA	NA	NA	NA	NA
aMAL13P1.294_1	aMAL13P1.294_1::MAL13P1.294::GTP-binding protein, putative	0.57363	0.481794	0.45018	0.345694	0.368511	0.56599	0.48455	0.426765	0.334547	0.326033	0.491873	0.491082	0.352423	0.333502	0.322901
aPFE0570w_8	aPFE0570w_8::PFE0570w::hypothetical protein	1.06065	1.15776	1.28805	1.09538	1.07659	1.43367	1.23599	1.21529	1.16849	1.11493	0.910584	1.15282	1.1685	1.01118	0.835331
aMAL8P1.17_1	aMAL8P1.17_1::MAL8P1.17::disulfide isomerase precursor, putative	2.09148	1.56583	1.66299	0.889316	0.758245	2.27268	1.76977	1.50074	1.31556	0.959516	1.68835	1.8833	1.61108	1.26731	0.802573
aPF10_0289_0	aPF10_0289_0::PF10_0289::adenosine deaminase, putative	0.369168	0.342656	0.3201	0.227752	0.194867	0.357795	0.316124	0.250124	0.20687	0.163861	0.372563	0.329025	0.225972	0.154745	0.155601
aPFC0610c_1	aPFC0610c_1::PFC0610c::hypothetical protein	1.49229	1.65617	1.70252	2.00774	3.55391	1.56831	1.45624	1.71554	1.5693	2.26027	1.50151	1.6218	1.7949	2.26515	2.86165
aPFE0835w_0	aPFE0835w_0::PFE0835w::ubiquitin carboxyl-terminal hydrolase 2, putative	1.57322	1.65824	1.9461	2.1067	2.40014	1.15317	1.762	1.94871	2.37415	2.63022	1.488	1.59233	2.03609	2.54929	2.4007
aPFC0350c_0	aPFC0350c_0::PFC0350c::T-complex protein eta subunit, putative	0.682961	0.693618	0.784308	1.22416	1.74609	0.638297	0.625769	0.565252	1.00526	1.39028	0.652829	0.618763	0.55732	1.02185	1.61099
aPFI1595c_0	aPFI1595c_0::PFI1595c::hypothetical protein	0.822109	0.715423	NA	1.27704	0.733163	0.476229	0.685367	0.919948	0.450911	0.64193	0.85318	0.860621	0.718896	0.493584	1.02954
aPFA0410w_0	aPFA0410w_0::PFA0410w::hypothetical protein	0.844827	0.847294	1.05722	1.15231	1.43353	0.993598	0.98983	1.00615	1.44486	1.34636	0.732744	1.01408	1.07717	1.21528	1.18397
aPFA0295c_0	aPFA0295c_0::PFA0295c::hypothetical protein	2.7645	2.60834	3.26986	3.50575	2.213	2.06823	3.10682	3.01845	4.81619	3.96307	3.14821	2.88142	3.34743	5.13594	5.36179
aPFC0581w_0	aPFC0581w_0::PFC0581w::hypothetical protein	3.15213	2.97591	2.85794	1.80981	1.63997	2.62051	3.33355	3.01986	2.12203	1.90214	2.66197	2.7918	2.26558	1.7142	1.07517
aMAL8P1.20_1	aMAL8P1.20_1::MAL8P1.20::hypothetical protein	NA	0.827565	NA	NA	NA	1.32771	0.967805	NA	NA	0.648687	NA	1.1123	0.892181	0.891119	0.880958
aPFC0425w_0	aPFC0425w_0::PFC0425w::hypothetical protein	0.427383	0.448567	0.561131	0.584291	1.08624	0.55851	0.496211	0.432418	0.484851	0.685851	0.454729	0.500904	0.467166	0.400203	0.490201
aMAL13P1.100_0	aMAL13P1.100_0::MAL13P1.100::hypothetical protein	1.18702	1.09234	0.744774	0.623605	0.758245	1.12824	1.24636	1.21812	0.678791	0.935866	NA	1.46097	1.21182	1.22729	0.584966
aPFL2190c_0	aPFL2190c_0::PFL2190c::hypothetical protein	0.269777	NA	NA	0.254865	NA	0.350315	0.332966	0.398503	NA	0.515233	NA	0.295877	0.478874	NA	0.410646
aPF07_0082_5	aPF07_0082_5::PF07_0082::hypothetical protein	1.29351	1.32286	1.43216	0.965233	0.750528	1.53216	1.52102	1.5714	1.1394	0.80748	1.40696	1.59233	1.48228	0.924469	0.937115
aPFC0166w_0	aPFC0166w_0::PFC0166w::	0.57505	0.526443	0.49099	0.35654	0.395522	0.512383	0.479368	0.494595	0.298991	0.396983	0.603304	0.49231	0.394573	0.616313	0.611874
aPF08_0058_0	aPF08_0058_0::PF08_0058::hypothetical protein	2.61683	2.42247	2.83626	3.7701	4.05362	2.42977	2.4098	3.06932	4.82912	7.07643	2.81392	2.83232	3.31582	5.42008	4.19888
aPF08_0032_1	aPF08_0032_1::PF08_0032::hypothetical protein	1.43834	1.4485	1.49465	0.709012	0.598107	1.82014	1.58321	1.31845	0.796772	0.670648	1.64896	1.63776	1.02332	0.612311	0.490201
aPFI1650w_0	aPFI1650w_0::PFI1650w::DNA excision-repair helicase, putative	0.680121	0.672851	0.609592	0.478549	0.447615	0.612116	0.646499	0.53275	0.471922	0.437526	0.66521	0.68997	0.566687	0.581628	0.774494
aPF11_0428_0	aPF11_0428_0::PF11_0428::hypothetical protein, conserved	1.11602	0.878444	0.747325	0.601915	0.559519	0.994845	0.900434	0.842226	0.596367	0.473001	0.979243	0.853255	0.766901	0.719031	0.621233
aPFC0205c_0	aPFC0205c_0::PFC0205c::PfGLP-1, 1-cys-glutaredoxin-like protein-1	0.57221	0.473488	0.51522	0.389076	0.333782	0.600896	0.498802	0.412634	0.344244	0.314208	0.503128	0.498448	0.311444	0.384195	0.400116
aPFD1045c_2	aPFD1045c_2::PFD1045c::erythrocyte membrane-associated antigen, putative	0.779513	0.966704	1.10058	1.14011	1.4972	1.04097	0.899139	0.97082	1.28001	1.64706	0.840799	0.971115	1.30432	1.70887	1.54431
aPFC0525c_1	aPFC0525c_1::PFC0525c::glycogen synthase kinase, putative	2.16815	2.25841	2.43454	1.97791	1.62646	2.07322	2.43571	2.35993	2.40648	2.19439	2.42447	2.3621	NA	2.61333	1.93273
aPFL1970w_3	aPFL1970w_3::PFL1970w::VAR pseudogene	0.12069	0.0436107	0.116052	NA	0.0520932	0.0523603	0.0570059	0.0678302	NA	NA	NA	0.0368311	0.0456628	0.0400203	0.0397777
aPFI1165c_0	aPFI1165c_0::PFI1165c::hypothetical protein	0.584989	NA	0.637649	0.672409	0.800691	NA	NA	1.06126	0.544649	0.863227	NA	0.708386	0.679088	0.880447	1.44252
aPFF0290w_0	aPFF0290w_0::PFF0290w::long chain polyunsaturated fatty acid elongation enzyme, putative	0.69006	0.691541	0.923316	1.4709	3.83367	0.770444	0.642612	0.787113	1.17172	2.4123	0.626941	0.666644	0.84886	1.17793	1.07985
aPF14_0101_6	aPF14_0101_6::PF14_0101::hypothetical protein	1.10466	0.898173	0.610868	0.536843	0.781398	1.10954	0.918573	1.00332	0.896974	NA	1.1886	1.04723	0.759876	1.03252	1.16291
aPF14_0229_0	aPF14_0229_0::PF14_0229::hypothetical protein	0.81359	0.792261	0.68356	0.482616	0.455333	0.957445	0.947076	0.83516	0.589902	0.49834	0.874566	0.967432	0.803197	0.7884	0.797893
aPFE0635c_2	aPFE0635c_2::PFE0635c::hypothetical protein	0.546653	0.275163	0.295869	0.235886	0.578813	0.357795	0.371834	0.356109	NA	0.334479	NA	0.364628	0.353594	0.22945	0.232816
aPFD0055w_0	aPFD0055w_0::PFD0055w::rifin	NA	0.218053	0.201497	NA	0.273972	0.229388	0.168427	0.366001	NA	NA	NA	NA	0.152209	0.142739	0.112313
aPF10_0278_1	aPF10_0278_1::PF10_0278::hypothetical protein, conserved	NA	0.372768	0.443804	0.456859	0.490062	0.437582	0.406815	0.401329	0.399194	0.354751	0.342172	0.368312	0.379352	0.378859	0.327581
aPF10_0230_0	aPF10_0230_0::PF10_0230::hypothetical protein, conserved	0.834888	0.65416	0.743499	NA	0.623189	0.762964	0.803265	0.983538	0.342628	NA	0.759758	0.683832	0.799684	1.00051	0.669201
aPFE0330w_0	aPFE0330w_0::PFE0330w::hypothetical protein	1.18702	1.79946	1.04574	0.932697	0.955042	1.19805	1.22174	0.908643	0.680408	0.834509	1.20886	0.923234	1.29846	1.15659	1.4589
aPF14_0151_0	aPF14_0151_0::PF14_0151::hypothetical protein	2.11136	1.92822	2.02645	2.2138	1.66312	1.81142	2.09238	2.1847	2.87678	2.79577	2.12057	1.95573	2.29016	2.91348	2.58204
aPF07_0037_1	aPF07_0037_1::PF07_0037::Cg2	0.651724	0.677004	0.605767	0.443302	0.391664	0.817818	0.729417	0.628843	0.460608	0.432458	0.70573	0.753811	0.530391	0.486914	0.498391
aPF14_0665_0	aPF14_0665_0::PF14_0665::hypothetical protein	1.02799	1.20656	1.12099	0.879826	0.684929	0.930018	1.1168	0.986365	0.981015	0.837887	1.04453	0.987075	0.989361	0.719031	0.617724
aPF14_0561_1	aPF14_0561_1::PF14_0561::hypothetical protein	0.539553	0.527482	0.614694	0.46906	0.52672	0.428856	0.629656	0.505901	0.496164	0.469622	0.584169	0.592982	0.502291	0.582962	0.621233
aPF13_0352_0	aPF13_0352_0::PF13_0352::hypothetical protein	0.252738	0.249204	0.318825	0.405344	0.715799	0.301695	0.281143	0.272734	0.3798	0.442594	0.237495	0.276234	0.302077	0.377525	0.518279
aPFI0910w_1	aPFI0910w_1::PFI0910w::DNA helicase, putative	1.02515	1.01966	0.788134	0.538199	0.596177	0.932511	1.11162	0.982125	0.636771	0.675716	1.04678	1.1344	1.00341	0.787066	1.09506
aMAL13P1.470_0	aMAL13P1.470_0::MAL13P1.470::null	0.0440162	0.0301121	0.0395342	NA	0.0327994	0.0311668	0.0336853	0.0310889	0.0339396	0.0304072	NA	0.0306926	0.029271	0.0787066	0.0491371
aPF11_0241_3	aPF11_0241_3::PF11_0241::hypothetical protein	1.68539	1.67694	1.58392	1.64171	1.38915	1.78274	1.8514	1.84837	1.93779	1.62172	1.68835	2.07359	1.58064	1.49142	1.98654
aPFD0403w_0	aPFD0403w_0::PFD0403w::	0.932859	1.16814	1.15287	0.818821	0.904878	0.935005	1.2036	1.16442	0.91152	0.869984	0.776641	0.990758	0.887497	0.659001	1.05645
achr13MALr.18_0	achr13MALr.18_0::chr13-MALr.18::(trna) anticodon	0.204462	NA	NA	NA	0.27783	0.188248	0.185269	0.235993	NA	0.197647	NA	NA	0.224801	NA	0.156771
aPFL1460c_0	aPFL1460c_0::PFL1460c::hypothetical protein	1.47525	NA	0.939895	0.908295	0.972406	1.38755	1.08052	1.18138	1.06182	1.70787	NA	1.33943	1.22704	2.01569	1.16291
aMAL7P1.25_1	aMAL7P1.25_1::MAL7P1.25::hypothetical protein	0.634685	0.545134	0.364735	0.363318	0.569166	0.706864	0.54933	0.55536	NA	0.555776	0.684345	0.737851	0.552637	0.550946	0.661011
aPF11_0482_2	aPF11_0482_2::PF11_0482::hypothetical protein	1.67829	1.93029	1.74588	1.18621	1.13061	2.20536	1.95375	1.76217	1.63556	1.44772	NA	1.77649	2.53721	1.61682	1.74671
aPF13_0176_1	aPF13_0176_1::PF13_0176::apurinic/apyrimidinic endonuclease Apn1	1.14726	1.89914	1.63493	2.02536	2.36349	1.26413	1.9965	2.23981	2.17052	2.37514	1.61519	1.80227	2.34988	1.63816	1.3384
aPF11_0326_2	aPF11_0326_2::PF11_0326::hypothetical protein	NA	0.144331	0.184918	0.183015	0.314488	NA	0.193043	0.303823	NA	NA	0.23862	0.257818	0.300906	0.176089	0.264404
aPFD1070w_1	aPFD1070w_1::PFD1070w::eukaryotic initiation factor	0.478499	0.432992	0.441253	0.367385	0.358864	0.518616	0.450865	0.395676	0.292527	0.314208	0.486245	0.446885	0.396915	0.376191	0.362679
aPFL0435w_0	aPFL0435w_0::PFL0435w::hypothetical protein	0.853346	0.832757	0.989631	0.692744	0.812268	0.930018	0.923755	0.719283	0.588286	0.652066	0.848678	0.858166	0.638108	0.574958	0.570926
aMAL8P1.113_3	aMAL8P1.113_3::MAL8P1.113::hypothetical protein	1.18702	1.52845	1.4921	1.09944	1.54157	1.25415	1.40571	1.24355	0.995561	1.32947	1.06816	1.69055	1.61576	1.20861	1.33372
aPFE0160c_0	aPFE0160c_0::PFE0160c::Ser/Arg-rich splicing factor, putative	0.80507	0.825488	0.622345	0.489395	0.407099	0.917551	0.796787	0.614712	0.515558	0.407119	0.747376	0.777137	0.638108	0.482912	0.472652
aMAL13P1.234_3	aMAL13P1.234_3::MAL13P1.234::hypothetical protein	1.8146	2.19611	1.99967	1.95622	1.67084	2.01836	2.17659	2.21296	2.12203	2.93767	1.77502	2.65553	3.18235	2.79475	1.87657
aPFL0925w_2	aPFL0925w_2::PFL0925w::Formin 2, putative	1.27931	1.58868	1.68849	1.85862	1.8194	1.62691	1.47827	2.03067	2.49052	2.98328	1.19085	1.50762	2.06068	2.36787	2.38081
aPFF1135w_0	aPFF1135w_0::PFF1135w::transcription or splicing factor-like protein, putative	0.843407	0.768379	0.670807	0.614116	0.669494	0.902591	0.759215	0.720696	0.659397	0.625037	NA	0.879037	0.745826	0.792402	0.67622
aPFE0915c_0	aPFE0915c_0::PFE0915c::proteasome subunit beta type 1	1.60588	1.33116	1.52016	0.915073	0.758245	1.78025	1.57673	1.30573	1.0796	0.967963	1.6332	1.5199	1.15913	0.984499	0.873938
aPFF1065c_0	aPFF1065c_0::PFF1065c::hypothetical protein	0.525354	0.829642	0.684835	0.641229	NA	0.75299	0.790309	0.813963	0.772529	1.02033	NA	0.794325	0.837151	1.14992	1.76894
aPFF0640w_0	aPFF0640w_0::PFF0640w::hypothetical protein	1.72515	NA	1.47042	0.898805	0.96083	1.72041	1.89804	1.73532	1.34627	1.31933	1.64783	1.5997	NA	1.15792	0.823631
aPFD0565c_1	aPFD0565c_1::PFD0565c::RNA helicase, putative	0.370588	0.420532	0.316274	0.271133	0.318347	0.418882	0.446978	0.343391	0.287678	0.320965	0.46711	0.478805	0.398086	0.388197	0.425855
aPFI0570w_0	aPFI0570w_0::PFI0570w::GTP-binding protein, putative	1.59452	1.87111	1.2753	0.929985	0.615471	1.41123	1.76977	1.70989	0.984248	0.978098	1.68835	1.70651	1.51507	1.43006	0.993271
aPFD1245c_0	aPFD1245c_0::PFD1245c::erythrocyte membrane protein 1 (PfEMP1)	NA	NA	0.178542	NA	NA	0.165808	NA	0.418286	NA	NA	NA	NA	NA	NA	0.124013
aPF13_0318_0	aPF13_0318_0::PF13_0318::hypothetical protein, conserved	1.07343	0.799529	0.90036	0.733414	0.638624	1.11453	0.903026	1.01745	0.838792	0.64193	0.856556	0.885175	0.798514	0.759052	0.441064
aPFL0125c_1	aPFL0125c_1::PFL0125c::hypothetical protein	0.590669	0.626125	0.837871	0.970655	1.31776	0.594663	0.513053	0.565252	0.57374	0.59463	0.512133	0.487399	0.456628	0.438889	0.942964
aPFI0195c_0	aPFI0195c_0::PFI0195c::hypothetical protein	1.04929	0.951129	0.955198	0.700878	0.630906	1.24792	1.04813	0.772982	0.735357	0.589562	0.98262	1.00917	0.839493	0.816414	0.799063
aPFI0450c_0	aPFI0450c_0::PFI0450c::apoptosis-related protein, putative	0.630425	0.54098	0.494816	0.372808	0.306771	0.654503	0.576537	0.449375	0.284446	0.246636	0.67534	0.461617	0.374669	0.357515	0.354489
aMAL13P1.237_0	aMAL13P1.237_0::MAL13P1.237::hypothetical protein	0.394726	0.342656	0.377488	0.344339	0.449545	0.441322	0.401633	0.346217	0.320002	0.390226	0.414209	0.376905	0.284514	0.32283	0.498391
aMAL7P1.43_1	aMAL7P1.43_1::MAL7P1.43::RIF pseudogene	NA	0.203517	0.290768	NA	0.331853	0.265541	NA	0.470572	NA	0.326033	NA	0.227125	0.275148	0.29615	0.239836
aMAL13P1.1_1	aMAL13P1.1_1::MAL13P1.1::	NA	NA	0.132631	NA	NA	NA	0.103647	NA	NA	NA	NA	0.143641	0.20841	NA	NA
aPFC0820w_3	aPFC0820w_3::PFC0820w::hypothetical protein	1.95659	2.69867	3.55298	6.28757	6.86472	1.50598	3.27266	5.34163	5.90549	7.18117	NA	3.45353	5.78395	4.21814	2.02632
aPF11_0036_0	aPF11_0036_0::PF11_0036::hypothetical protein, conserved	0.761054	0.706078	0.91949	1.33804	1.57051	0.776677	0.765693	0.88038	1.21698	1.38015	0.811534	0.827473	0.935502	1.28065	1.19567
aMAL7P1.15_2	aMAL7P1.15_2::MAL7P1.15::hypothetical protein	0.34361	0.375883	0.461658	0.471771	0.497779	0.412649	0.463821	0.46068	0.405659	0.445972	0.342172	0.357262	0.391061	0.360183	0.524129
aPF13_0151_1	aPF13_0151_1::PF13_0151::hypothetical protein	1.10608	1.21591	1.0687	0.755105	0.901019	1.06591	1.24247	1.25345	1.22667	1.11662	1.31916	1.34434	1.41438	1.33134	1.21088
aPFC1065w_1	aPFC1065w_1::PFC1065w::hypothetical protein	0.773833	0.795376	0.585362	0.508374	0.507426	0.900098	0.726825	0.664171	0.640003	0.613212	0.686596	0.840978	0.780951	0.75505	0.711318
aPF11_0007_3	aPF11_0007_3::PF11_0007::erythrocyte membrane protein 1 (PfEMP1)	0.252738	0.200402	0.359634	0.258932	0.189079	0.225648	0.212477	0.241645	0.223031	0.138522	0.402953	0.1817	0.196701	0.154745	0.263234
aPFF1290c_0	aPFF1290c_0::PFF1290c::hypothetical protein	0.789452	0.594975	0.431051	NA	0.33957	0.822804	0.64909	0.471985	0.295759	0.341236	NA	0.82379	0.407453	0.473574	0.311202
aPF07_0049_0	aPF07_0049_0::PF07_0049::erythrocyte membrane protein 1 (PfEMP1)	0.433062	0.374844	0.381314	0.268421	0.337641	0.336602	0.28503	0.431005	0.219799	0.342926	0.298275	0.268867	0.309102	0.345509	0.783854
ac5rRNA28s_0	ac5rRNA28s_0::c5rRNA28s::	1.12596	0.690503	0.881231	0.702234	0.831561	0.559756	0.535078	0.456441	0.425053	0.47469	0.607806	0.427241	0.443749	0.357515	0.356829
aPFF1280w_0	aPFF1280w_0::PFF1280w::hypothetical protein	2.40953	2.56057	2.72659	2.43884	2.24579	2.01961	2.67928	2.60157	3.14668	3.38365	2.37382	2.45664	2.7386	3.51645	3.17285
aPFL0375w_0	aPFL0375w_0::PFL0375w::hypothetical protein	1.95233	1.62086	1.9257	1.30144	1.1364	1.79272	2.02241	1.62369	1.38506	1.30244	1.43847	1.87962	1.49516	1.74755	1.52676
aPF14_0146_0	aPF14_0146_0::PF14_0146::ribonucleoprotein, putative	0.836308	0.747612	0.698863	0.515152	0.505497	0.992352	0.787718	0.599167	0.4897	0.378401	0.750753	0.730485	0.504632	0.481578	0.549868
aMAL13P1.249_2	aMAL13P1.249_2::MAL13P1.249::hypothetical protein	2.14543	2.29787	2.28151	1.69729	1.29075	2.61303	2.3489	2.48994	2.18345	1.67746	1.96862	2.00607	2.45291	2.02903	1.86721
aPF07_0024_1	aPF07_0024_1::PF07_0024::hypothetical protein	1.23103	1.38724	1.71655	1.60917	1.40845	1.49975	1.61042	1.73674	1.76486	1.91734	1.29665	1.48184	1.85227	1.97033	2.58672
aPFE0055c_0	aPFE0055c_0::PFE0055c::heat shock protein, putative	0.288235	0.251281	0.299695	0.614116	1.2676	0.287981	0.25264	0.265668	0.460608	0.935866	NA	0.246769	0.240022	0.428217	0.487861
aPF07_0045_0	aPF07_0045_0::PF07_0045::hypothetical protein	0.942798	0.891943	0.820017	0.623605	0.642483	0.649517	1.08052	1.03017	0.806469	0.611523	1.03665	1.08529	0.979994	0.76172	NA
aPFE0215w_1	aPFE0215w_1::PFE0215w::ATP-dependent helicase, putative	1.20548	1.36128	0.950097	0.719858	0.733163	1.72914	1.42774	1.17714	0.774145	0.707812	1.62532	1.48921	1.1041	1.00051	0.704298
aPF14_0580_0	aPF14_0580_0::PF14_0580::hypothetical protein	1.48093	1.86176	1.32759	1.45463	1.33513	2.12807	1.9693	1.70706	1.57738	1.56259	0.95223	2.03676	1.85227	1.64217	1.1126
aPF11_0431_0	aPF11_0431_0::PF11_0431::membrane skeletal protein, putative	0.751115	0.708155	0.392792	0.370096	1.61682	0.531083	0.607631	1.07822	0.336163	1.29568	0.390572	0.870443	0.597129	1.22329	1.14419
aPF13_0333_1	aPF13_0333_1::PF13_0333::hypothetical protein	1.1785	1.19099	1.26892	1.03302	0.74474	1.40625	1.32927	1.29867	1.04405	0.78383	1.237	1.26085	1.20831	1.01785	1.32436
aPFA0435w_0	aPFA0435w_0::PFA0435w::hypothetical protein	1.42414	1.37166	1.38115	0.881182	0.914525	1.31025	1.35389	1.16018	1.08445	1.08959	1.36869	1.37503	1.28441	1.18193	0.949984
aPFC0755c_0	aPFC0755c_0::PFC0755c::protein kinase, putative	2.12982	NA	2.05833	1.82744	1.22708	2.39112	2.50696	2.61429	2.78789	2.20114	2.46274	2.69358	2.93296	2.94149	2.68265
aPF10_0163_0	aPF10_0163_0::PF10_0163::hypothetical protein	0.329411	0.306313	0.539451	1.24721	2.68376	0.320395	0.309646	0.46068	0.798388	1.65888	0.25888	0.308154	0.357107	0.665671	0.737057
aPFC0760c_4	aPFC0760c_4::PFC0760c::hypothetical protein	1.69675	1.62606	1.87979	2.06061	2.18984	1.84134	1.89545	2.38395	2.48405	2.46636	1.55441	2.0294	2.58873	2.19044	1.63205
aPF10_0354_0	aPF10_0354_0::PF10_0354::hypothetical protein	3.65476	4.77226	1.18985	1.80574	2.98668	1.7441	2.27894	2.92659	1.00203	2.5238	2.02715	1.35048	1.81949	NA	3.76367
aMAL8P1.157_0	aMAL8P1.157_0::MAL8P1.157::hypothetical protein	0.638945	0.735152	0.631273	0.532776	0.497779	0.855218	0.765693	0.679716	0.504245	0.532126	0.548151	0.798008	0.647475	0.610977	0.666861
aPFF1590w_1	aPFF1590w_1::PFF1590w::RIFIN	0.0596348	0.0373806	NA	NA	0.0636694	0.0598403	NA	NA	NA	NA	NA	0.0405143	0.0409794	0.0453563	NA
aPF14_0218_0	aPF14_0218_0::PF14_0218::actin, putative	0.709939	0.721653	0.679734	0.562601	0.632836	0.858958	0.820108	0.76309	0.680408	0.631794	0.75413	0.656822	0.611179	0.582962	0.576776
aMAL7P1.161_0	aMAL7P1.161_0::MAL7P1.161::dynein light chain, putative	1.76775	NA	0.535625	0.389076	0.748598	NA	1.71536	1.21388	0.526871	0.778762	1.02877	1.88207	0.66855	0.845762	0.890317
aMAL8P1.35_0	aMAL8P1.35_0::MAL8P1.35::exonuclease, putative	0.504056	0.473488	0.562406	0.435168	0.486203	0.526096	0.531191	0.637322	0.336163	0.471312	0.613434	0.519319	0.577225	0.416211	0.384907
aPFI0625c_0	aPFI0625c_0::PFI0625c::hypothetical protein	0.57221	0.519175	0.459107	0.393143	0.393593	0.664477	0.531191	0.435244	0.449295	0.457797	0.44685	0.537735	0.44609	0.493584	0.420005
aPFA0240w_1	aPFA0240w_1::PFA0240w::hypothetical protein	0.176065	0.184826	0.258885	NA	0.258537	NA	0.172313	0.361761	NA	NA	NA	0.218531	NA	0.422881	0.610704
aPFE1120w_8	aPFE1120w_8::PFE1120w::hypothetical protein	8.91399	8.66711	10.034	12.4884	11.3332	6.71583	7.85256	10.2961	15.095	15.305	6.94812	7.24469	10.6465	8.69641	4.50189
aPFI0030c_0	aPFI0030c_0::PFI0030c::rifin	0.971196	1.0207	NA	1.03573	1.721	0.898851	0.954849	1.01321	0.969702	1.11831	0.925216	0.881492	1.19777	1.00451	0.857559
aPFL0405w_1	aPFL0405w_1::PFL0405w::hypothetical protein	0.285395	0.305275	0.215525	0.271133	0.455333	NA	0.297985	0.306649	0.266668	0.467933	0.338796	0.370767	0.341886	0.361517	0.249195
aPF10_0107_0	aPF10_0107_0::PF10_0107::hypothetical protein	NA	1.13803	1.04574	0.942186	1.0573	1.36511	1.10902	1.02735	0.984248	0.92742	0.422088	1.07056	NA	1.41538	1.05645
aPF11_0454_0	aPF11_0454_0::PF11_0454::Ribosomal protein, 40S subunit, putative	1.04361	0.801606	0.485889	0.402632	0.416745	0.866438	0.751442	0.832334	0.633539	0.606455	0.955606	0.829929	0.578395	0.680345	0.365018
aPFL0270c_1	aPFL0270c_1::PFL0270c::hypothetical protein	1.56896	1.8763	1.89892	1.93996	1.44317	1.66805	1.93302	1.69717	1.95395	1.58117	1.69961	1.81455	1.64854	1.57413	2.38315
aPFL0885w_1	aPFL0885w_1::PFL0885w::hypothetical protein	1.22819	1.35712	1.83898	1.94538	1.83291	1.26413	1.33575	1.54172	1.81173	2.22817	1.27752	1.37257	1.86632	2.61199	3.7157
atRNARNALys_0	atRNARNALys_0::tRNARNA-Lys::	1.13164	0.572131	0.465484	0.436524	0.351147	0.623336	0.559694	0.539816	0.657781	0.611523	0.729367	0.518091	0.357107	0.650997	0.300672
aPFF0285c_0	aPFF0285c_0::PFF0285c::DNA repair protein RAD50, putative	0.941378	0.964627	0.915664	0.561245	0.737022	0.873918	1.04554	0.85777	0.648084	0.743287	1.22799	1.09266	0.985848	0.704357	0.932435
aPFD0745c_0	aPFD0745c_0::PFD0745c::nonclathrin coat protein zeta2-cop-related protein, putative	1.80324	1.85242	1.65406	1.53461	1.66891	1.94481	1.68556	1.57423	1.63072	1.5305	1.50939	1.64021	1.50219	1.57947	1.02486
arpoC_1	arpoC_1::rpoC::	1.72373	1.60944	2.08639	1.75694	1.50106	1.4611	1.01186	0.630256	0.505861	0.503408	1.32704	1.09757	0.539758	0.510926	0.499561
aPFF0960c_0	aPFF0960c_0::PFF0960c::hypothetical protein	1.91257	2.36744	2.64242	2.05519	1.55122	2.72024	2.60673	3.01845	2.62466	2.21635	2.43573	2.37315	2.72572	2.94016	2.86633
aPF14_0211_0	aPF14_0211_0::PF14_0211::hypothetical protein	1.96369	1.35505	2.70873	1.28381	1.43546	1.9286	2.61579	2.562	1.31395	1.23656	1.47112	2.85073	1.61342	0.812412	1.65428
aPF13_0164_1	aPF13_0164_1::PF13_0164::hypothetical protein, conserved	2.89229	3.77129	3.32088	3.52202	2.8111	3.51312	3.3789	3.63316	4.15517	3.88874	NA	3.99864	4.11199	4.72506	4.19654
aMAL7P1.38_1	aMAL7P1.38_1::MAL7P1.38::regulator of chromosome condensation protein, putative	0.741176	0.612626	0.66188	0.493462	0.43411	0.868931	0.665933	0.664171	0.55273	0.457797	0.584169	0.655594	0.593616	0.516262	0.491371
aPFL2330w_1	aPFL2330w_1::PFL2330w::hypothetical protein	1.3716	1.14011	0.939895	0.516508	0.519002	1.1245	1.37592	1.04289	0.743438	0.608144	1.4835	1.1921	0.790318	0.640325	0.478502
aPF13_0016_0	aPF13_0016_0::PF13_0016::methyl transferase-like protein, putative	1.27079	1.13284	0.877405	0.685966	0.607754	1.5546	1.09089	1.09094	0.787075	0.643619	1.01976	1.08897	0.903889	0.731037	0.50073
aPF13_0322_0	aPF13_0322_0::PF13_0322::falcilysin	1.58032	1.40177	1.57499	1.07097	0.83735	1.61444	1.40831	1.17572	1.02465	0.917284	1.52289	1.42782	1.24695	1.13257	1.02252
aPFD0365c_0	aPFD0365c_0::PFD0365c::hypothetical protein	0.742596	0.782916	0.550929	0.45957	0.490062	0.977392	0.809743	0.638735	0.528488	0.402051	NA	0.772226	0.559662	0.396201	0.228137
aPFF0810c_1	aPFF0810c_1::PFF0810c::hypothetical protein	0.770993	0.690503	0.510119	0.376875	0.646341	0.59217	0.621883	0.733414	0.444447	0.677405	0.604429	0.817652	0.645133	0.960487	0.67505
aMAL13P1.114_1	aMAL13P1.114_1::MAL13P1.114::hypothetical protein	2.66085	3.33414	3.41652	3.6508	3.22013	2.57812	3.20529	3.92144	4.74669	5.50201	2.95574	3.43021	4.33328	4.77709	4.44574
aPF11_0053_1	aPF11_0053_1::PF11_0053::PfSNF2L	1.24949	1.25017	1.36202	1.00861	0.825773	1.32397	1.27616	1.29584	1.10546	1.10311	0.975867	1.19824	1.22119	1.39537	1.2799
aMAL8P1.213_0	aMAL8P1.213_0::MAL8P1.213::	NA	NA	NA	NA	0.113833	NA	NA	0.0819615	NA	NA	NA	NA	NA	NA	0.0608364
aPF13_0229_1	aPF13_0229_1::PF13_0229::IRP-like protein	2.65233	2.94061	3.17677	3.4949	2.85741	2.32255	2.88916	3.62468	4.35719	4.19282	2.64846	2.86055	3.76542	3.59783	3.26762
aPFL1165w_1	aPFL1165w_1::PFL1165w::hypothetical protein	0.92292	1.11207	1.37095	2.81978	7.54579	0.800364	0.917277	1.24497	2.10264	2.64543	1.02201	1.12581	1.40267	2.18911	1.47879
aPFE0250w_2	aPFE0250w_2::PFE0250w::hypothetical protein	1.63996	1.86384	1.8071	1.28924	1.01485	1.97224	1.85658	1.82294	1.50465	1.25176	1.78965	1.93364	1.96116	1.65817	0.957004
aPFL1345c_1	aPFL1345c_1::PFL1345c::hypothetical protein, conserved	0.283975	0.256472	0.337954	0.322648	0.540226	0.305435	0.270778	0.288279	0.292527	0.410497	0.299401	NA	0.311444	0.357515	0.414156
aMAL7P1.202_0	aMAL7P1.202_0::MAL7P1.202::	1.24097	1.13907	1.15287	0.978789	0.779468	1.5172	1.39535	1.12768	1.19758	0.917284	1.00063	1.35907	1.309	1.314	0.887978
aPFI0260c_6	aPFI0260c_6::PFI0260c::hypothetical protein	0.603448	NA	0.557305	0.582936	1.06502	0.289228	0.703505	0.935492	0.585054	1.16899	0.443473	0.947788	0.754022	NA	6.68616
aMAL8P1.74_0	aMAL8P1.74_0::MAL8P1.74::hypothetical protein	1.1288	1.02277	0.844247	0.561245	0.501638	0.839011	1.19065	0.904403	0.593134	0.49834	1.46549	1.34065	0.956577	0.732372	0.813102
aPF10_0105_0	aPF10_0105_0::PF10_0105::hypothetical protein	NA	0.860792	0.839146	0.73477	0.829632	0.66323	0.949667	0.864836	0.745054	0.738219	0.877942	0.888858	0.906231	0.74838	0.573266
aPF07_0007_0	aPF07_0007_0::PF07_0007::hypothetical protein	0.34219	0.293853	0.395342	0.33756	0.349217	0.356548	0.316124	0.319367	0.34586	0.329411	0.32754	0.305699	0.314956	0.325498	0.366188
aPFC0305w_1	aPFC0305w_1::PFC0305w::EB1 homolog, putative	0.407505	NA	0.756252	0.475838	NA	0.375249	0.503984	0.606233	NA	0.709501	0.305029	0.475122	0.488241	NA	0.568586
aPFF0390w_1	aPFF0390w_1::PFF0390w::hypothetical protein	0.961257	1.083	0.961575	1.04115	1.00521	1.18309	0.963918	0.893098	0.643236	NA	0.865561	1.09634	NA	1.61682	4.02573
aMAL13P1.332_0	aMAL13P1.332_0::MAL13P1.332::hypothetical protein	1.06207	1.01551	1.00111	0.817465	1.22515	1.45113	1.18417	0.883206	0.930914	0.920663	0.957858	1.09389	0.718896	0.82842	0.706638
aPFI0625c_1	aPFI0625c_1::PFI0625c::hypothetical protein	0.381947	0.376921	0.404269	0.310447	0.422534	0.486202	0.413293	0.367414	0.381416	0.376711	0.377065	0.422331	0.37584	0.385529	0.482012
aPF14_0379_3	aPF14_0379_3::PF14_0379::hypothetical protein	1.27079	1.56999	1.18603	0.836445	0.933818	1.57704	1.58191	1.70706	1.04889	1.05749	1.43847	1.43396	1.66377	0.931139	1.50804
aPFD0235c_0	aPFD0235c_0::PFD0235c::hypothetical protein	2.29026	2.30514	2.26238	2.67608	3.52111	2.05701	2.23748	2.58038	2.49537	3.65055	1.99	2.15339	2.15201	3.54446	4.56975
aMAL13P1.75_0	aMAL13P1.75_0::MAL13P1.75::hypothetical protein	0.876064	0.927247	0.953923	0.801197	0.798762	1.01978	NA	0.919948	0.754751	0.788898	0.813785	0.960065	0.989361	0.960487	0.946474
aPFL0005w_3	aPFL0005w_3::PFL0005w::erythrocyte membrane protein 1 (PfEMP1)	0.413184	0.455836	1.06105	0.412122	0.771751	0.420129	0.418475	0.41546	0.386265	0.491583	0.434469	0.31552	NA	0.408207	0.797893
aPFI1210w_1	aPFI1210w_1::PFI1210w::hypothetical protein	3.23448	3.72145	4.38065	3.34036	2.48697	3.19647	4.15625	4.37222	4.15356	3.58974	3.69411	3.61314	5.18097	4.70772	4.86223
aPF10_0360_0	aPF10_0360_0::PF10_0360::hypothetical protein	2.26612	2.11616	1.58647	1.07369	0.968547	1.86004	2.48753	2.22851	1.71314	1.40211	2.60006	2.25529	1.8991	1.55946	1.07985
aPF11_0410_0	aPF11_0410_0::PF11_0410::hypothetical protein	0.400405	0.401841	0.410646	NA	0.351147	0.375249	0.366652	0.443723	0.174546	0.273665	0.381567	0.468983	0.353594	0.409541	0.443404
aPF08_0010_0	aPF08_0010_0::PF08_0010::hypothetical protein	1.27647	1.50457	1.23576	1.02895	0.891372	1.77152	1.64669	1.27323	1.0699	0.898702	1.24488	1.56532	NA	1.06988	0.753436
aPFD0872w_4	aPFD0872w_4::PFD0872w::	0.613387	0.977087	0.886332	1.07233	1.06887	0.56973	1.26579	1.33399	0.916368	1.19602	0.933095	1.16509	1.37457	0.672341	0.796723
aPF10_0267_0	aPF10_0267_0::PF10_0267::hypothetical protein	0.540973	0.502561	NA	0.393143	NA	0.325382	0.4405	0.573731	0.313537	0.417254	0.553779	0.580704	0.564345	NA	NA
aPFC0410w_0	aPFC0410w_0::PFC0410w::rat BRAIN protein-like	0.484178	0.461027	0.520322	0.736126	1.08624	0.482462	0.459934	0.418286	0.49778	0.628416	0.472738	0.459162	0.44492	0.608309	0.85054
aPF10_0319_1	aPF10_0319_1::PF10_0319::hypothetical protein	1.06633	1.19099	1.40283	1.19027	1.06116	1.30028	1.22174	1.20823	1.24283	1.20784	1.05353	1.21543	1.19075	1.34468	2.17841
aPFD0225w_3	aPFD0225w_3::PFD0225w::hypothetical protein	0.850506	1.07781	1.35054	1.4709	1.28497	0.647023	1.00797	1.30432	1.10061	1.40887	0.877942	0.990758	1.35818	1.56746	1.63556
aPFI1590c_0	aPFI1590c_0::PFI1590c::hypothetical protein	1.31197	1.34882	1.8377	1.16452	0.856643	1.44614	1.6169	1.55303	1.27354	0.994991	1.3822	1.47325	1.49868	1.35802	1.78999
aPF11_0160_0	aPF11_0160_0::PF11_0160::hypothetical protein	2.12272	2.20026	1.59285	1.3638	1.23287	2.43725	2.21416	1.98403	2.02344	2.07445	2.08005	2.24424	2.46111	3.24831	2.81368
aMAL8P1.91_0	aMAL8P1.91_0::MAL8P1.91::hypothetical protein	1.75213	1.75689	1.52526	1.61866	1.50491	1.68924	1.70759	1.80881	2.15435	2.27547	1.17284	2.00975	1.99863	2.52928	1.60281
aPFC0955w_1	aPFC0955w_1::PFC0955w::ATP-dependent RNA helicase	1.55619	1.69563	1.67447	1.35973	0.970477	1.67054	1.80216	1.82152	1.55476	1.33454	1.66134	1.90049	1.86047	1.46074	0.910206
aPFA0300c_0	aPFA0300c_0::PFA0300c::vacuolar ATP synthase, putative	1.59168	1.42877	1.22046	1.32042	1.14412	1.43617	1.54952	1.41454	1.58546	1.46124	1.51164	1.47325	1.25982	1.34335	0.923076
aPF11_0400_0	aPF11_0400_0::PF11_0400::hypothetical protein	0.989654	1.10169	1.0636	0.771373	0.667564	1.22548	1.13494	0.877554	0.795156	0.832819	1.1886	1.10862	0.996386	0.889785	1.07634
aPFI1730w_0	aPFI1730w_0::PFI1730w::cytoadherence linked asexual protein (CLAG)	4.17586	4.0018	4.91627	3.37831	2.27474	5.18616	4.87919	4.38777	4.08891	3.20289	4.44486	4.87644	4.05111	2.48526	1.28224
aPF13_0130_0	aPF13_0130_0::PF13_0130::vacuolar ATP synthase subunit g, putative	1.46673	1.07677	0.987081	0.704945	0.522861	1.28906	1.11032	1.09376	1.01819	0.711191	1.25838	1.18474	0.860568	0.953817	0.525299
aPF14_0737_0	aPF14_0737_0::PF14_0737::lysophospholipase, putative	1.24239	1.03835	0.480787	0.565312	0.96083	0.777924	1.0585	1.13898	0.688488	0.859848	0.882445	1.00058	0.819589	0.79507	0.423515
aPF11_0358_0	aPF11_0358_0::PF11_0358::DNA-directed RNA polymerase, beta subunit, putative	0.247059	0.222207	0.237205	0.318581	0.528649	0.270528	0.22025	0.235993	0.266668	0.471312	0.279141	0.234492	0.243535	0.336171	0.388417
aPF14_0031_1	aPF14_0031_1::PF14_0031::hypothetical protein	0.646044	0.767341	0.581536	0.666987	0.652129	0.462516	0.665933	0.914295	NA	0.763559	0.572914	0.59912	0.688455	0.494918	0.664521
aPF07_0017_1	aPF07_0017_1::PF07_0017::hypothetical protein	2.04036	2.19611	2.30319	2.02672	1.52035	2.29637	2.14809	2.29775	2.42749	2.06769	1.84931	2.1669	2.4693	2.18111	1.61801
aPFE0355c_1	aPFE0355c_1::PFE0355c::serine protease belonging to subtilisin family, putative	3.66896	3.99869	3.72387	3.41085	2.82654	3.6353	4.15755	4.49234	4.26184	3.79076	4.05429	4.51427	4.53233	3.66052	2.389
aPFB0820c_0	aPFB0820c_0::PFB0820c::hypothetical protein	0.752535	0.797453	NA	0.553111	0.601966	0.841504	0.820108	0.795592	0.767681	0.694298	0.961234	0.887631	0.934331	0.896455	NA
aMAL7P1.79_1	aMAL7P1.79_1::MAL7P1.79::hypothetical protein	1.01947	1.11519	0.734572	0.675121	0.654059	1.16439	1.06497	0.927013	0.630306	0.66558	1.06929	1.18228	0.941356	0.537606	1.13366
aPFA0560c_0	aPFA0560c_0::PFA0560c::hypothetical protein	0.840567	0.93763	0.885057	0.607337	0.534437	1.15068	0.950962	0.719283	0.575357	0.452729	0.676466	0.739078	0.720067	0.672341	0.493711
aPF10_0113_1	aPF10_0113_1::PF10_0113::hypothetical protein	0.900202	0.61678	0.529249	0.4189	0.480415	1.07588	0.791605	0.658519	0.491316	0.579426	1.17847	0.924462	0.569029	1.23263	0.913716
aPF14_0087_1	aPF14_0087_1::PF14_0087::hypothetical protein	0.553752	0.481794	0.474411	0.391787	0.349217	0.516123	0.544147	NA	0.429901	NA	0.587546	0.553695	NA	0.421547	0.416495
aPF14_0282_3	aPF14_0282_3::PF14_0282::hypothetical protein, conserved	0.526774	0.572131	0.605767	0.498884	0.491991	0.56225	0.557103	0.556773	0.378184	0.402051	0.540272	0.574566	0.530391	0.418879	0.418835
aPF14_0640_1	aPF14_0640_1::PF14_0640::hypothetical protein	0.254158	0.262703	0.318825	NA	0.418675	0.218168	0.292803	NA	0.258587	0.268597	0.290396	NA	0.269293	0.254796	0.293653
aPFI1665w_0	aPFI1665w_0::PFI1665w::uncharacterised trophozoite protein	1.8004	1.6624	1.96396	1.43158	1.17113	2.01961	1.87601	1.86816	1.67112	1.29906	1.46999	1.67091	1.54551	1.35535	1.41679
aPFD0940w_2	aPFD0940w_2::PFD0940w::hypothetical protein	NA	4.84598	4.18935	2.58118	2.0953	2.75889	5.06187	4.59126	2.53092	2.28054	5.15397	5.07288	4.5171	2.31851	1.36063
aPFI1580c_0	aPFI1580c_0::PFI1580c::DHHC-type zinc finger protein, putative	2.87667	3.56673	1.96523	1.7244	1.56472	NA	3.36464	3.26433	2.96244	2.41399	3.54441	3.50387	3.9633	3.3417	1.9222
aPF10_0177_0	aPF10_0177_0::PF10_0177::erythrocyte membrane-associated antigen	1.13164	1.29275	1.59412	2.23007	3.24907	1.29903	1.15437	1.24638	1.99112	2.91065	1.30341	1.38485	1.56893	1.51143	1.61684
aPFL0575w_2	aPFL0575w_2::PFL0575w::hypothetical protein	0.81359	0.997854	0.965401	0.679188	0.713869	NA	1.10255	0.980712	0.808085	0.751734	0.763134	0.903591	1.00107	0.661669	0.622403
aPFA0330w_2	aPFA0330w_2::PFA0330w::pfAARP2 protein	0.711358	0.679081	0.896535	1.0181	1.28882	0.816571	0.751442	0.85353	0.937379	1.12845	0.756381	0.777137	0.766901	1.01918	0.961683
aPFB0670c_0	aPFB0670c_0::PFB0670c::hypothetical protein	1.16288	1.27198	1.76884	4.08597	6.22803	1.05219	1.2632	2.066	4.01618	4.93272	1.03777	1.20806	NA	3.95534	3.21614
aMAL13P1.333_0	aMAL13P1.333_0::MAL13P1.333::hypothetical protein	0.6929	0.73619	0.839146	0.932697	1.00906	0.761717	0.680184	0.754611	0.808085	0.929109	0.691098	0.740306	0.797343	0.865772	1.05294
aPF11_0191_1	aPF11_0191_1::PF11_0191::hypothetical protein	0.543813	0.571093	0.674633	0.706301	0.694576	0.70063	0.659455	0.617538	0.861419	0.810859	0.550402	0.586843	0.731776	0.891119	1.14536
aPFA0250w_0	aPFA0250w_0::PFA0250w::hypothetical protein	1.08905	1.25017	0.672082	0.45957	0.478485	0.795377	1.07793	1.05278	0.546265	0.59294	1.13682	1.12212	0.743484	0.640325	0.538168
aPF14_0664_0	aPF14_0664_0::PF14_0664::biotin carboxylase subunit of acetyl CoA carboxylase, putative	NA	NA	1.80455	1.06013	NA	2.06698	2.35797	2.67788	1.13778	2.76706	2.37607	2.7562	3.084	3.33236	3.5016
aPFF0505c_0	aPFF0505c_0::PFF0505c::conserved hypothetical protein	0.596348	0.617818	0.604491	0.596492	0.551802	0.635803	0.632247	0.654279	0.523639	0.464554	0.529016	0.553695	0.573712	0.59897	1.02837
aPF14_0274_0	aPF14_0274_0::PF14_0274::hypothetical protein, conserved	0.237119	0.165098	0.187469	0.172169	0.283618	0.203208	0.18786	0.190773	0.169698	NA	0.207104	0.197661	0.166259	0.198767	0.263234
aPFE1415w_0	aPFE1415w_0::PFE1415w::cell cycle regulator with zn-finger domain, putative	3.40628	3.44525	3.65118	4.48725	5.84408	3.3149	3.112	3.25868	4.84851	5.86521	3.17072	3.17362	4.02535	4.77576	3.93448
aPF13_0253_0	aPF13_0253_0::PF13_0253::ethanolamine-phosphate cytidylyltransferase, putative	0.717038	0.658314	0.882506	1.04928	1.55315	0.69689	0.668524	0.726349	1.20243	1.38184	0.63482	0.67401	0.732946	1.49809	2.07546
aMAL13P1.390_0	aMAL13P1.390_0::MAL13P1.390::null	0.596348	0.611588	0.635098	0.5504	0.536367	0.743017	0.662046	0.624603	0.528488	NA	0.557156	0.67401	0.615862	0.549612	0.930095
aPF11_0126_0	aPF11_0126_0::PF11_0126::hypothetical protein	NA	0.917901	0.988356	1.24314	2.06057	1.15691	0.991126	0.992017	1.16364	1.14027	NA	0.98953	0.840664	0.963155	0.916056
aPF14_0352_1	aPF14_0352_1::PF14_0352::ribonucleoside-diphosphate reductase, large subunit	2.61683	2.82327	3.23161	2.50798	1.51456	3.31615	2.78681	2.32743	2.4388	2.06938	2.47737	2.54749	2.49038	2.80142	3.4045
aPFE0420c_3	aPFE0420c_3::PFE0420c::guanidine nucleotide exchange factor, putative	2.38539	2.92607	2.95742	3.28206	2.5545	2.37367	3.09387	2.92377	4.15841	3.6742	2.43348	3.05944	3.4973	3.71522	3.13659
aMAL13P1.264_1	aMAL13P1.264_1::MAL13P1.264::hypothetical protein	0.414604	0.369653	0.443804	0.584291	0.754386	0.291721	0.361469	0.462093	0.580205	0.706123	0.321912	0.368312	0.398086	0.517596	0.463293
aPFC0590c_2	aPFC0590c_2::PFC0590c::hypothetical protein	1.39006	1.50249	1.02789	0.685966	0.530579	1.83261	1.37332	1.12203	0.793539	0.630105	1.92585	1.56901	1.1486	0.753716	0.491371
aPFE0660c_0	aPFE0660c_0::PFE0660c::uridine phosphorylase, putative	0.817849	0.781878	0.636374	0.326715	0.256607	0.897605	0.785127	0.570905	0.329699	0.221297	0.732744	0.714524	0.41799	0.198767	0.135712
aPFF1125c_1	aPFF1125c_1::PFF1125c::RNA-binding protein mei2 homologue, putative	0.393306	0.341617	0.304796	0.229107	0.327994	0.154587	0.348513	0.48753	0.328083	0.447662	0.638196	0.521775	0.488241	0.628319	0.822462
aPF10_0143_3	aPF10_0143_3::PF10_0143::ADA2-like protein	3.08255	2.86896	3.04159	2.30734	1.8059	2.20661	1.91618	2.05045	1.7988	1.74841	3.61532	1.65863	1.87569	1.95432	1.39105
aPFD0800c_1	aPFD0800c_1::PFD0800c::hypothetical protein	1.81602	2.02374	NA	1.81117	1.74223	1.68924	2.13902	2.70897	2.48567	2.29912	1.92247	2.43699	2.94467	2.45858	2.05206
aPFE0325w_0	aPFE0325w_0::PFE0325w::hypothetical protein	0.790871	1.01966	0.969226	0.99099	1.06116	0.993598	0.941893	0.887446	0.882429	0.92573	0.798027	0.977253	0.998727	0.923135	1.39924
aMAL13P1.123_2	aMAL13P1.123_2::MAL13P1.123::hypothetical protein	2.32434	2.33733	2.68195	2.01858	1.6882	1.95603	2.79977	3.06791	2.73456	2.58799	2.86682	3.00174	3.09687	2.60265	1.76192
aPF11_0306_0	aPF11_0306_0::PF11_0306::A/G-specific adenine glycosylase, putative	1.02657	1.03835	0.798337	0.523286	0.472697	0.911318	0.976874	0.821028	0.546265	0.496651	1.00626	0.994441	0.886327	0.695019	0.645802
aPF14_0321_0	aPF14_0321_0::PF14_0321::ABC transporter, putative	0.516835	1.01654	0.674633	0.695456	1.1036	0.60339	0.520827	0.795592	0.578589	0.773694	0.542523	0.548784	0.535074	0.59897	0.663351
aPF13_0327_0	aPF13_0327_0::PF13_0327::hypothetical protein	1.97647	1.82334	1.86704	1.39769	1.3795	2.17669	1.83196	1.91903	2.11718	1.77713	1.98212	2.07237	1.85227	1.81159	1.22141
aPFE0075c_1	aPFE0075c_1::PFE0075c::rhoptry-associated protein, putative	2.71338	2.48477	3.14744	3.22648	3.2047	2.78133	2.59506	2.8305	3.70265	4.14552	2.24213	2.4063	2.39203	2.48793	1.1711
aPFA0165c_1	aPFA0165c_1::PFA0165c::hypothetical protein	NA	0.782916	0.805988	0.927274	1.58402	0.821557	0.785127	0.837986	0.745054	0.898702	0.715861	0.757494	0.764559	0.641659	0.802573
aPF11_0507_2	aPF11_0507_2::PF11_0507::antigen 332, putative	0.377687	0.470373	0.485889	0.46906	0.451474	0.378989	0.404224	0.431005	0.386265	0.456108	0.342172	0.432152	0.539758	0.596302	0.437554
aPFE0465c_4	aPFE0465c_4::PFE0465c::RNA polymerase I	0.298174	0.293853	0.377488	0.456859	0.740881	0.349068	0.305759	0.316541	0.362022	0.530437	0.305029	0.313065	0.312615	0.374857	0.438724
aPFE1455w_1	aPFE1455w_1::PFE1455w::sugar transporter, putative	0.296754	0.317735	0.38514	NA	0.468839	0.428856	0.515644	0.592101	0.244042	0.445972	0.299401	0.613853	0.559662	0.261466	0.723017
aPF14_0371_1	aPF14_0371_1::PF14_0371::hypothetical protein	0.592089	NA	0.585362	0.35654	0.594248	0.513629	0.562286	NA	NA	0.50003	NA	0.651911	0.437895	0.813746	1.8169
aPFA0615w_0	aPFA0615w_0::PFA0615w::hypothetical protein	0.0553752	0.0872214	0.0905462	0.0948965	0.202585	0.0810337	0.0958736	0.0890272	0.164849	0.420633	0.0641573	0.123998	0.133476	0.0720365	0.145071
aPFE0425w_0	aPFE0425w_0::PFE0425w::hypothetical protein	2.01055	1.80984	2.00732	2.00367	1.40652	1.34142	1.93431	2.1847	2.27557	2.08458	1.84143	2.03062	2.11103	3.62584	2.54343
aPF08_0103_2	aPF08_0103_2::PF08_0103::erythrocyte membrane protein 1 (PfEMP1)	NA	0.017652	0.0306072	NA	NA	0.0187001	0.0194338	0.0197838	NA	NA	NA	NA	0.0187335	NA	0.017549
aPFF0175c_3	aPFF0175c_3::PFF0175c::hypothetical protein	0.886003	1.01654	1.2804	0.904228	1.39108	0.815324	1.03388	1.18562	1.14586	1.37677	0.944351	1.07301	1.2446	1.37536	1.83445
aPFI1200w_0	aPFI1200w_0::PFI1200w::hypothetical protein	1.02089	1.02485	1.39263	2.67879	4.0131	1.06092	1.08052	1.24073	2.25132	3.04917	0.993876	1.11598	1.29261	2.09039	2.24042
aPFB0240w_1	aPFB0240w_1::PFB0240w::hypothetical protein, conserved	0.417444	0.344732	0.376213	0.298246	0.376229	0.442569	0.369243	0.316541	0.341012	0.307451	0.462608	0.439518	0.373498	0.396201	0.387247
aPFA0515w_2	aPFA0515w_2::PFA0515w::phosphatidylinositol-4-phosphate 5-kinase, putative	0.769573	0.856639	0.994732	1.06148	1.52807	0.848984	0.971692	0.946797	0.947076	1.20784	0.908333	0.963748	1.07483	0.992503	0.997951
aPF10_0334_1	aPF10_0334_1::PF10_0334::flavoprotein subunit of succinate dehydrogenase	1.29777	1.29067	1.40155	1.14554	1.01292	1.34391	NA	1.28736	1.33819	1.06763	1.30003	1.30259	1.3933	1.27131	1.16408
aPF11_0288_0	aPF11_0288_0::PF11_0288::hypothetical protein	NA	0.155753	0.206598	NA	0.252748	NA	0.198225	0.281213	NA	0.197647	NA	0.185383	0.22246	NA	NA
aPFI1550c_0	aPFI1550c_0::PFI1550c::hypothetical protein	2.20365	2.4069	3.21503	4.80041	7.49177	1.9286	2.64689	3.38586	5.62912	6.6879	2.09693	2.59046	3.30411	5.17329	5.56068
aPFA0285c_0	aPFA0285c_0::PFA0285c::hypothetical protein	2.5004	2.55642	2.73296	2.18669	1.71522	2.70902	2.69742	3.16682	3.14668	3.08295	3.05254	3.084	3.00204	3.38438	2.57268
aPFE0060w_1	aPFE0060w_1::PFE0060w::hypothetical protein	0.359229	0.311505	0.289493	0.23453	0.266254	0.385222	0.309646	0.30241	0.295759	0.324343	0.354554	0.34253	0.257585	0.314826	0.269084
aPF14_0419_2	aPF14_0419_2::PF14_0419::hypothetical protein	0.887423	1.15361	1.12099	0.812043	1.07659	1.14569	1.08052	1.22094	1.04728	1.22473	1.0389	1.19333	1.4776	1.10723	0.978062
aMAL13P1.305_0	aMAL13P1.305_0::MAL13P1.305::hypothetical protein	0.949898	0.935553	0.990907	0.756461	1.23673	0.60339	0.791605	1.28595	0.609296	1.11662	NA	1.01654	0.91911	1.04186	1.30915
aPF11_0165_0	aPF11_0165_0::PF11_0165::falcipain 2 precursor	0.504056	0.398726	0.419573	0.482616	0.839279	0.570976	0.488437	0.375893	0.458992	0.748355	0.50538	0.516864	0.364132	0.380193	0.377888
aPFL0115w_0	aPFL0115w_0::PFL0115w::hypothetical protein	1.02515	1.85034	1.03682	0.91914	NA	1.27784	1.44069	1.54879	0.943843	1.81092	1.47449	1.29768	1.82885	1.88229	1.50336
aMAL8P1.45_1	aMAL8P1.45_1::MAL8P1.45::hypothetical protein	0.408925	0.455836	0.47186	0.42839	1.22323	0.433842	0.357583	0.399916	0.357174	1.10648	0.478366	0.468983	0.441407	0.847096	2.14916
aPFL0785c_0	aPFL0785c_0::PFL0785c::signal recognition particle 19 kd protein, putative	1.06775	0.954244	0.869753	0.859491	0.679141	1.21177	0.903026	1.06267	1.20405	0.80748	0.964611	0.946561	0.97414	1.13257	0.776834
aPFC0060c_0	aPFC0060c_0::PFC0060c::Serine/threonine protein kinase, putative	0.91866	0.923093	0.865927	0.985568	1.30233	0.825298	0.760511	1.00191	1.00364	0.947691	NA	0.773454	1.01629	1.03919	1.28224
aPFE0355c_0	aPFE0355c_0::PFE0355c::serine protease belonging to subtilisin family, putative	3.81947	4.46594	4.48012	3.84466	3.32625	NA	4.97117	4.74529	4.59154	3.65224	3.54666	5.07533	5.09667	4.06473	3.15413
aMAL13P1.218_0	aMAL13P1.218_0::MAL13P1.218::UDP-N-acetylglucosamine pyrophosphorylase, putative	0.502636	0.535789	0.353258	0.25622	0.358864	0.604636	0.497506	0.484704	0.298991	0.369954	0.480617	0.607714	0.489412	0.428217	0.476162
aPF11_0439_0	aPF11_0439_0::PF11_0439::hypothetical protein	0.770993	0.651045	0.702689	0.549044	0.520932	0.791637	0.643908	0.558186	0.509094	0.378401	0.721488	0.713297	0.545612	0.557616	0.541678
ac11rRNA28s_1	ac11rRNA28s_1::c11rRNA28s::	1.09189	1.80777	2.35037	1.56444	1.4451	1.17312	0.917277	0.774395	0.667478	0.604765	1.05128	0.712069	0.859397	0.528268	0.762795
aPF14_0710_6	aPF14_0710_6::PF14_0710::hypothetical protein	1.20548	1.18164	1.0891	1.21467	1.09589	1.26413	1.09089	1.38769	1.23799	2.11837	1.54991	0.960065	1.35349	1.306	0.900847
aPFF0680c_0	aPFF0680c_0::PFF0680c::thiamin-phosphate pyrophosphorylase, putative	1.62008	1.58556	1.75991	1.65255	1.21358	1.75033	1.86824	1.63499	1.98304	1.83964	1.69285	1.7237	1.80075	1.95432	1.86838
aPF11_0079_1	aPF11_0079_1::PF11_0079::hypothetical protein	1.27221	1.20033	1.21153	1.02217	0.953112	1.25914	1.11291	1.09376	0.976167	0.944313	0.720363	1.19701	1.25982	1.15659	0.740566
aMAL13P1.81_0	aMAL13P1.81_0::MAL13P1.81::hypothetical protein, conserved	1.22677	1.15361	1.64003	1.97385	1.96989	1.17561	1.10773	1.20681	1.70021	1.84639	0.99275	1.03618	1.10762	1.52477	1.46592
aPF14_0686_0	aPF14_0686_0::PF14_0686::hypothetical protein	0.542393	0.61678	0.461658	0.332138	0.416745	0.347822	0.579128	0.60058	0.308688	0.381779	0.551528	0.554923	0.505803	NA	0.306522
aPF10_0211_5	aPF10_0211_5::PF10_0211::hypothetical protein	1.34746	1.91679	3.42545	6.31604	8.58959	1.33394	1.78921	3.38162	5.90387	5.70135	1.18297	1.73597	3.27016	3.36037	2.23457
aMAL13P1.135_0	aMAL13P1.135_0::MAL13P1.135::snare protein homologue, putative	1.95233	2.13589	2.05833	1.76779	1.3332	1.86253	1.95375	2.01371	2.23193	1.7501	1.89208	2.07728	2.08293	1.69553	0.965193
aPF14_0285_0	aPF14_0285_0::PF14_0285::exodeoxyribonuclease III, putative	1.40568	1.18683	1.16817	0.88796	0.874008	1.43492	1.36555	1.14746	0.87758	0.836198	0.716986	1.27313	1.11698	1.17126	0.906696
aPFC0820w_7	aPFC0820w_7::PFC0820w::hypothetical protein	2.36268	2.85235	4.14854	6.35129	5.98686	1.64187	3.13921	4.50223	5.91518	6.70648	2.27927	3.07417	4.29699	3.77125	1.8871
aMAL8P1.86_0	aMAL8P1.86_0::MAL8P1.86::hypothetical protein	0.900202	0.95009	0.7486	0.582936	0.586531	0.881398	0.875818	0.736241	0.636771	0.599698	1.01076	0.890086	0.601812	0.594968	0.324071
aPF14_0512_1	aPF14_0512_1::PF14_0512::hypothetical protein	0.715618	0.670774	0.780482	0.802553	0.80455	0.782911	0.739781	0.797005	0.845257	1.05749	0.825041	0.726801	0.766901	0.892453	0.947644
aPF10_0157_0	aPF10_0157_0::PF10_0157::hypothetical protein	0.34361	NA	0.674633	NA	0.598107	0.229388	0.348513	NA	0.365254	0.650376	NA	NA	0.465995	0.574958	1.05879
aPF08_0098_0	aPF08_0098_0::PF08_0098::abc transporter, putative	0.991074	0.884674	0.818741	0.629028	0.762104	0.917551	0.836951	0.883206	0.606064	0.739909	NA	0.858166	0.828955	0.893787	0.930095
aPFL2405c_1	aPFL2405c_1::PFL2405c::PFG377 protein	0.715618	0.915825	NA	0.981501	1.34478	0.852724	1.09218	1.49085	1.22991	1.53219	NA	0.988303	1.21885	1.00851	NA
aPFD0615c_1	aPFD0615c_1::PFD0615c::erythrocyte membrane protein 1 (PfEMP1)	NA	0.0446491	0.142833	NA	NA	0.0748004	0.0479368	0.121529	NA	NA	NA	0.0380589	NA	NA	NA
aPF14_0031_4	aPF14_0031_4::PF14_0031::hypothetical protein	NA	1.78285	1.88362	1.28246	1.24831	1.67927	2.12477	2.11404	2.01375	1.62003	1.59718	2.00361	1.98575	1.74889	1.58643
aPF11_0098_0	aPF11_0098_0::PF11_0098::endoplasmic reticulum-resident calcium binding protein	2.79432	2.51488	2.11827	1.16723	0.852785	2.83743	2.89435	2.18187	1.37374	0.922352	2.15096	2.62852	1.86515	0.908461	0.882128
aMAL13P1.39_3	aMAL13P1.39_3::MAL13P1.39::hypothetical protein	1.91257	1.99363	2.24197	1.67018	1.11325	2.54446	2.36834	2.30058	1.93779	1.39873	2.11156	2.24056	2.36861	1.72487	1.22141
aPFC0790w_1	aPFC0790w_1::PFC0790w::hypothetical protein	0.587829	0.478679	0.460383	0.310447	0.318347	0.517369	0.563581	0.501661	0.387881	0.334479	0.500877	0.545101	0.467166	0.422881	0.562737
aPF14_0634_0	aPF14_0634_0::PF14_0634::hypothetical protein	0.319472	0.280355	0.219351	0.250798	0.314488	0.282995	0.250049	0.398503	0.189092	0.317586	0.338796	0.281144	0.277489	0.274806	0.212927
aMAL7P1.134_4	aMAL7P1.134_4::MAL7P1.134::hypothetical protein	0.891683	0.751765	1.15797	0.840512	1.00135	1.07089	0.944484	0.774395	0.740206	0.628416	1.00401	1.41432	0.799684	0.597636	0.621233
aPF11_0083_1	aPF11_0083_1::PF11_0083::nucleic acid binding factor, putative	2.69351	2.94372	2.32104	1.74745	1.8059	2.47839	2.9384	2.86441	2.48244	2.52549	2.59331	2.73042	3.69869	3.17895	1.80637
aPFD1045w_1	aPFD1045w_1::PFD1045w::	2.17667	2.08397	1.42833	0.981501	0.841208	1.70296	1.90711	2.17481	1.33334	1.27372	2.60906	2.32773	2.08176	1.33134	0.749926
aPFD1060w_2	aPFD1060w_2::PFD1060w::u5 small nuclear ribonucleoprotein-specific protein, putative	0.988234	0.966704	1.12481	0.809331	0.810338	1.17561	1.01056	1.0867	0.872732	0.772005	NA	1.01286	1.01629	0.833756	0.635273
aPF13_0013_0	aPF13_0013_0::PF13_0013::PBS lyase HEAT-like repeat domain protein	0.638945	0.490101	0.622345	0.534132	0.77368	0.617103	0.527305	0.508727	0.475154	0.586183	0.548151	0.391638	0.451945	0.51893	0.546358
aPFD0535w_0	aPFD0535w_0::PFD0535w::hypothetical protein	2.01197	2.54915	2.68833	2.2016	2.59501	2.47091	2.55361	3.06791	3.00446	4.132	2.28828	2.93667	3.30528	3.59916	2.94355
aPF10_0273_0	aPF10_0273_0::PF10_0273::hypothetical protein	1.3574	1.10065	0.706515	0.462281	0.671423	1.09957	1.12457	0.979299	NA	0.567601	1.2944	1.20192	0.77978	0.715029	0.938285
aPF07_0015_1	aPF07_0015_1::PF07_0015::hypothetical protein	0.434482	0.398726	0.457832	0.374163	0.382017	0.497423	0.439205	0.446549	0.341012	0.390226	0.369186	0.396549	0.382865	0.624317	1.01082
aPF14_0184_1	aPF14_0184_1::PF14_0184::hypothetical protein	2.15253	2.20442	2.13612	1.49936	1.4316	1.94356	2.38129	2.23275	1.6889	1.57273	2.46049	2.44191	2.64844	2.09973	2.30008
aPF13_0189_1	aPF13_0189_1::PF13_0189::hypothetical protein	1.41562	1.43292	1.17455	0.829666	0.823844	1.20553	1.65058	1.39476	0.785459	0.961205	1.75588	1.72738	NA	1.41805	1.14653
aPFL0935c_3	aPFL0935c_3::PFL0935c::erythrocyte membrane protein 1 (PfEMP1)	0.655983	0.563824	0.689936	0.631739	0.501638	0.620843	0.474186	0.689607	0.255355	0.508476	0.418711	0.32657	0.30676	0.413543	0.258555
aPFI1085w_2	aPFI1085w_2::PFI1085w::ubiquitin-like protein, putative	0.92434	0.554479	0.682284	0.54091	0.607754	0.624583	0.558399	0.496009	0.462225	0.486515	0.693349	0.542646	0.588933	0.593634	0.988592
aPF11_0262_1	aPF11_0262_1::PF11_0262::hypothetical protein	1.65842	1.08611	0.656778	0.456859	0.534437	1.1993	1.02352	0.809724	0.635155	0.56929	1.87745	0.864304	0.899206	1.14458	0.858729
aPF14_0530_1	aPF14_0530_1::PF14_0530::ferlin, putative	2.04888	2.18573	2.17821	1.75423	1.53578	2.40982	2.4072	2.2059	3.25012	2.43089	2.01589	2.44682	2.77723	3.4871	2.91547
aPF10_0111_0	aPF10_0111_0::PF10_0111::20S proteasome beta subunit, putative	2.1071	2.06839	1.35692	1.0059	0.816126	2.02584	1.88638	0.637322	1.40284	1.02202	1.50939	1.93241	1.3652	1.36202	0.932435
aMAL13P1.336_1	aMAL13P1.336_1::MAL13P1.336::hypothetical protein	1.05781	0.903365	0.957749	0.786285	0.638624	1.25665	1.08441	0.990604	0.829095	0.694298	1.04115	1.07793	0.908573	0.883115	0.969873
aPF13_0189_0	aPF13_0189_0::PF13_0189::hypothetical protein	1.27079	1.37581	1.1618	0.787641	0.71194	1.28657	1.44976	1.29019	0.976167	0.918973	1.50713	1.73352	1.49516	1.32601	1.31266
aPF08_0027_1	aPF08_0027_1::PF08_0027::hypothetical protein	0.406085	0.466219	0.497366	0.448725	0.478485	0.553523	0.489733	0.474812	0.395962	0.473001	0.454729	0.47635	0.455457	0.469572	0.418835
aPFL0110c_0	aPFL0110c_0::PFL0110c::PfmpC	2.68925	2.5045	2.47663	1.4709	1.29847	2.90225	2.52381	2.2822	2.21415	1.68253	2.3862	2.63711	2.57819	2.07038	1.05177
aPFF0685c_0	aPFF0685c_0::PFF0685c::Hypothetical protein	0.965516	0.96255	0.905462	0.780862	0.86629	1.03848	0.94578	0.823855	0.66263	0.731462	0.757507	1.10493	0.792659	0.839092	1.08102
aMAL13P1.162_0	aMAL13P1.162_0::MAL13P1.162::DNAJ-like protein, putative	0.853346	0.842102	0.803438	0.507018	0.673353	1.01479	0.831768	0.863422	0.640003	0.71288	0.889198	0.976025	0.69665	0.82175	0.744076
aPF11_0447_0	aPF11_0447_0::PF11_0447::translation initiation factor eIF-1A, putative	1.09756	0.745535	0.816191	0.66292	0.601966	1.05843	0.865453	0.914295	0.669094	0.584494	0.846426	0.822562	0.531562	0.673675	0.583796
aPF14_0759_0	aPF14_0759_0::PF14_0759::hypothetical protein	1.12028	1.47653	0.624896	NA	NA	0.623336	1.52232	NA	0.60768	0.675716	0.880193	1.95205	1.19894	0.589632	NA
aPF08_0099_0	aPF08_0099_0::PF08_0099::hypothetical protein, conserved	1.66552	1.28548	0.946271	0.455503	0.43411	1.35638	1.35907	1.24921	0.762832	0.599698	1.42272	1.16755	0.880472	0.53894	0.369698
aPF11_0526_0	aPF11_0526_0::PF11_0526::hypothetical protein	0.437322	0.401841	0.382589	0.33756	0.345358	0.541056	0.457343	0.422526	0.344244	0.326033	0.472738	0.475122	0.348911	0.409541	0.520619
aPF10_0374_8	aPF10_0374_8::PF10_0374::gene 11-1 protein precursor	0.531034	0.673889	0.59939	0.664275	1.11325	0.447556	0.71387	NA	0.559195	1.14027	NA	0.842206	1.03385	0.600304	1.0272
aPFB0755w_0	aPFB0755w_0::PFB0755w::hypothetical protein	NA	2.60626	2.08256	1.56579	1.69206	2.54321	2.79588	2.68212	2.17375	2.1285	2.53928	2.65184	2.80416	2.94549	NA
aPFI0595c_1	aPFI0595c_1::PFI0595c::hypothetical protein	NA	0.142254	NA	NA	NA	0.114694	NA	0.169576	NA	NA	NA	0.151008	0.168601	0.246792	0.423515
aPF10_0089_1	aPF10_0089_1::PF10_0089::hypothetical protein	0.411764	NA	0.525423	0.585647	0.611613	0.396442	0.388677	0.480464	0.41374	0.57098	0.390572	0.454251	0.540929	0.474908	0.483181
aPFF0220w_2	aPFF0220w_2::PFF0220w::hypothetical protein, expressed	0.239959	NA	0.334128	0.281978	0.621259	0.519863	0.331671	0.573731	0.428285	0.577737	0.424339	0.217304	0.357107	0.3295	0.446914
aPF07_0062_1	aPF07_0062_1::PF07_0062::GTP-binding translation elongation factor tu family protein, putative	1.16714	1.00097	1.07508	0.774084	0.640553	1.10081	1.06886	0.936905	0.787075	0.682473	1.1357	1.14177	1.19309	0.907127	0.975722
aPFE0170c_1	aPFE0170c_1::PFE0170c::protein kinase, putative	0.725557	0.69881	0.830219	0.9693	0.995558	0.759224	0.73719	0.901577	0.930914	0.85647	0.664084	0.728029	0.791489	0.884449	1.08453
aPF08_0095_1	aPF08_0095_1::PF08_0095::dihydropteroate synthetase	0.437322	0.443375	0.466759	0.322648	0.337641	0.440076	0.437909	0.388611	0.295759	0.260151	0.409706	0.40146	0.37584	0.317494	0.389587
aPFF0200c_0	aPFF0200c_0::PFF0200c::hypothetical protein	3.45314	3.10882	3.44713	3.26308	2.20914	4.65383	4.89733	5.08585	5.53538	4.18944	3.44986	4.2982	5.31679	6.18981	4.63293
aPF08_0091_0	aPF08_0091_0::PF08_0091::hypothetical protein	2.82414	3.05586	3.1028	2.49849	2.27088	3.00822	3.02909	3.02692	3.52325	3.23161	2.75089	2.96736	2.5138	2.42256	1.21088
aPF07_0043_0	aPF07_0043_0::PF07_0043::60S ribosomal protein L34-a, putative	1.04077	0.589783	0.348156	0.351117	0.293265	0.802857	0.614109	0.556773	0.525255	0.429079	0.749628	0.597892	0.348911	0.55895	0.195378
aMAL7P1.122_1	aMAL7P1.122_1::MAL7P1.122::conserved GTP-binding protein, putative	0.756794	0.569016	0.615969	0.433812	0.509356	0.820311	0.621883	0.46492	0.404043	0.398672	0.603304	0.590526	0.414478	0.442891	0.489031
aPF10_0083_0	aPF10_0083_0::PF10_0083::hypothetical protein	0.587829	NA	0.820017	0.690033	0.781398	0.58469	0.590789	0.966581	0.378184	0.898702	0.607806	0.55615	0.497607	0.691017	1.09155
aPF07_0086_1	aPF07_0086_1::PF07_0086::hypothetical protein	1.70527	1.87422	2.1323	1.46141	1.41037	1.92237	1.90711	1.9798	1.85375	1.28724	1.48687	1.95696	2.2164	1.8356	1.61918
aPF07_0069_0	aPF07_0069_0::PF07_0069::hypothetical protein	1.52211	1.51807	1.23066	NA	1.24831	1.49975	1.44329	1.33541	1.64203	1.91396	1.72887	1.69301	1.6181	1.90363	1.494
aPFF1090c_1	aPFF1090c_1::PFF1090c::hypothetical protein	1.07059	0.875329	0.567508	0.29689	0.393593	0.777924	0.879705	0.730588	0.34586	0.466244	1.41934	0.980936	0.608837	0.681679	0.485521
aPFI0165c_1	aPFI0165c_1::PFI0165c::DEAD/DEAH box helicase, putative	0.525354	0.564862	0.552204	0.549044	0.497779	0.57721	0.6167	0.552534	0.512326	0.400361	0.496375	0.546329	0.533903	0.521598	0.604854
aPFD0485w_0	aPFD0485w_0::PFD0485w::hypothetical protein	1.04219	1.12038	1.40665	1.50343	1.45668	1.33643	1.27227	1.36932	1.75516	1.7501	1.09743	1.2498	1.17904	1.18193	0.778004
aPF14_0155_0	aPF14_0155_0::PF14_0155::hypothetical protein	1.34036	1.33947	0.732021	0.810687	2.25544	1.09707	0.922459	1.24921	0.672327	2.22479	0.570663	1.27436	NA	2.59465	1.88593
aPFI0790w_0	aPFI0790w_0::PFI0790w::thioredoxin, putative	1.79756	1.42462	1.26255	1.29466	1.36793	1.71792	1.32798	1.54738	1.46425	1.67409	NA	1.41432	1.25397	1.75823	2.00877
aPF13_0176_0	aPF13_0176_0::PF13_0176::apurinic/apyrimidinic endonuclease Apn1	2.27038	2.3176	1.8071	1.54952	1.03993	2.43725	2.4966	2.05893	1.98466	1.60989	2.2759	2.6457	2.0478	1.71554	1.44018
aMAL13P1.32_3	aMAL13P1.32_3::MAL13P1.32::hypothetical protein	0.836308	1.15568	0.668256	0.798486	1.62454	1.03349	1.4109	1.82435	0.651317	1.68929	NA	1.74457	1.78905	1.15659	1.15589
aPFI0095c_1	aPFI0095c_1::PFI0095c::hypothetical protein	0.268357	0.253357	0.241031	0.235886	0.326065	0.265541	0.238388	0.204904	0.202021	0.288868	0.315159	0.245541	0.22246	0.3295	0.416495
aPFL1225c_0	aPFL1225c_0::PFL1225c::hypothetical protein	0.474239	0.501523	0.484613	NA	0.874008	0.479969	0.493619	0.579383	0.530104	0.576048	0.445725	0.461617	0.496437	0.582962	0.574436
aPFE1555c_3	aPFE1555c_3::PFE1555c::hypothetical protein	3.12373	3.49509	3.33108	2.47273	2.06829	4.33094	3.87252	4.26059	4.07598	3.39209	NA	4.00723	4.22088	3.16294	1.06464
arps17_0	arps17_0::rps17::	1.33752	1.25848	0.893984	0.929985	0.497779	NA	0.148993	0.199251	NA	NA	0.88357	NA	NA	0.192097	0.0935945
aMAL13P1.137_2	aMAL13P1.137_2::MAL13P1.137::hypothetical malaria antigen	3.13935	3.59788	3.76851	2.98788	1.97182	4.15641	3.99948	4.23515	4.15032	3.012	2.99513	4.54374	5.08028	4.91316	3.74261
aPF13_0151_0	aPF13_0151_0::PF13_0151::hypothetical protein	1.05781	0.95009	0.992182	0.877115	0.74474	1.38381	1.15567	1.20964	1.12324	0.750044	0.753004	1.18596	1.18723	1.16192	0.838841
aPF14_0399_0	aPF14_0399_0::PF14_0399::ADP-ribosylation-like factor, putative	0.478499	0.456874	0.498642	0.505663	0.571096	0.345328	0.553216	0.544055	0.483235	0.464554	0.47724	0.518091	0.456628	0.404205	0.544018
aPF10_0131_0	aPF10_0131_0::PF10_0131::hypothetical protein	1.02515	1.31974	1.44491	1.90606	2.83233	1.15193	1.28782	1.98262	2.18183	2.26196	NA	1.31242	1.8593	1.99034	1.6496
aPF14_0080_0	aPF14_0080_0::PF14_0080::hypothetical protein	0.69716	0.563824	0.589188	0.374163	0.58846	0.638297	0.559694	0.675476	0.447679	0.481447	0.524514	0.561061	0.738801	0.83509	0.593155
aPF14_0370_1	aPF14_0370_1::PF14_0370::RNA helicase, putative	0.549492	0.788108	0.737122	0.593781	0.472697	0.483709	0.719052	0.705152	0.599599	0.572669	0.530142	0.671555	0.704846	0.783064	1.51623
aPF11_0289_2	aPF11_0289_2::PF11_0289::hypothetical protein	1.02515	1.07885	1.0738	0.687322	0.632836	1.00482	1.1155	1.033	0.772529	0.653755	1.06366	1.12581	1.04205	0.779062	0.959343
aPFL2465c_0	aPFL2465c_0::PFL2465c::thymidylate kinase, putative	2.30304	1.85657	1.81092	1.21874	1.14991	2.20162	2.12088	1.65054	1.37051	1.30244	2.07217	2.1006	1.47058	1.2433	1.20152
aPFB0130w_0	aPFB0130w_0::PFB0130w::polyprenyl synthetase, putative	1.16714	1.22006	0.827668	0.576157	0.603895	0.497423	1.06886	0.866249	0.743438	0.449351	1.47224	1.019	1.09825	1.30466	0.574436
aPFF1125c_0	aPFF1125c_0::PFF1125c::RNA-binding protein mei2 homologue, putative	0.932859	0.859754	0.848073	0.620894	0.877867	0.952458	1.01186	0.887446	0.712731	1.01188	NA	0.912185	0.900377	1.18727	2.00292
aPFB0435c_1	aPFB0435c_1::PFB0435c::hypothetical protein	2.77728	2.54396	1.89254	1.89793	1.60331	2.31258	2.53676	2.70897	2.66668	2.47312	2.70474	2.71077	3.03833	3.33903	2.16437
aMAL7P1.100_1	aMAL7P1.100_1::MAL7P1.100::serine/threonine protein kinase 2, putative	0.629005	0.841064	0.725645	0.584291	1.12483	0.665723	0.917277	1.52194	0.517174	1.09466	NA	1.53954	1.42374	0.747046	0.975722
aPF10_0385_0	aPF10_0385_0::PF10_0385::PfEMP-1, truncated, putative	0.183164	0.204555	0.200222	NA	0.121551	0.155834	0.158062	0.226101	0.095354	0.170618	NA	NA	0.242364	0.162749	NA
aPF08_0130_0	aPF08_0130_0::PF08_0130::wd repeat protein, putative	0.352129	0.332272	0.454006	0.515152	0.756316	0.349068	0.357583	0.406981	0.357174	0.467933	0.296024	0.333936	0.344227	0.393533	0.538168
aPFL1785c_1	aPFL1785c_1::PFL1785c::hypothetical protein	3.23732	3.51066	3.18569	NA	2.86705	3.24634	3.4955	NA	4.26669	4.32965	3.52302	3.84886	3.40949	2.61066	1.89178
aPF14_0333_0	aPF14_0333_0::PF14_0333::hypothetical protein	1.36308	1.49107	1.56096	1.40447	1.58981	1.73537	1.43163	1.58129	1.51758	2.15722	1.58142	1.76544	1.56893	2.09573	1.58292
aPFB0540w_1	aPFB0540w_1::PFB0540w::hypothetical protein	1.6641	1.77869	1.8122	1.31228	1.14798	1.85006	2.06258	1.85968	1.6291	1.63354	1.81329	2.12025	2.22694	1.90497	2.15033
aPF11_0236_0	aPF11_0236_0::PF11_0236::hypothetical protein	2.029	NA	1.80327	1.62544	2.26702	NA	2.08979	2.65244	1.96688	2.39034	1.90784	2.1448	2.57234	1.3767	1.07751
aMAL8P1.82_0	aMAL8P1.82_0::MAL8P1.82::hypothetical protein	2.23205	2.79939	3.23671	2.57169	2.26123	NA	3.02131	3.18096	3.67194	3.45291	2.28715	2.80162	3.43173	3.49911	3.7976
aPF11_0336_0	aPF11_0336_0::PF11_0336::hypothetical protein, conserved	1.13164	1.0342	0.888883	0.752394	0.536367	1.24293	1.08959	0.963755	0.91152	0.581115	1.06816	1.12826	0.934331	0.875111	0.759285
aPFC0885c_0	aPFC0885c_0::PFC0885c::hypothetical protein	0.905882	0.825488	0.711616	0.50973	0.55759	0.809091	0.877114	0.854944	0.627074	0.543951	0.993876	0.860621	0.82193	0.675009	0.730037
aPFE1255w_1	aPFE1255w_1::PFE1255w::hypothetical protein	2.05314	2.01336	2.37205	2.17042	2.66061	2.35497	2.42275	2.37123	2.3887	2.0508	1.93823	2.36702	2.4213	1.77957	1.4823
aPF14_0657_0	aPF14_0657_0::PF14_0657::hypothetical protein	0.699999	0.7175	0.738398	0.555822	0.702293	0.619596	0.611518	0.662758	0.41374	0.765248	0.67534	0.698564	0.661525	0.610977	0.727697
aPFB0960c_0	aPFB0960c_0::PFB0960c::hypothetical protein	NA	0.345771	0.302246	0.417545	0.46305	0.377742	0.322602	0.511553	0.223031	0.353061	NA	0.303243	0.289198	NA	0.16847
aPF10_0067_0	aPF10_0067_0::PF10_0067::hypothetical protein	0.448681	0.52852	0.613418	0.605982	0.762104	0.56599	0.510462	0.55536	0.576973	0.586183	0.355679	0.500904	0.601812	0.588298	0.540508
aPF14_0056_0	aPF14_0056_0::PF14_0056::hypothetical protein	0.567951	0.597051	0.564957	0.6941	0.750528	0.656997	0.642612	0.594928	0.594751	0.716259	0.500877	0.497221	0.499949	0.506924	0.586135
aPF14_0495_1	aPF14_0495_1::PF14_0495::hypothetical protein	4.20568	4.00803	5.90208	5.80766	4.83309	4.28232	4.19382	4.89791	6.09458	6.32132	4.32555	4.30433	4.15531	4.43692	3.08745
aPF14_0110_0	aPF14_0110_0::PF14_0110::hypothetical protein	0.9286	1.03316	1.6107	2.52289	3.73142	0.892618	1.06238	1.50357	2.48082	3.27722	0.973615	1.10616	1.75509	2.31984	2.09886
aMAL13P1.259_0	aMAL13P1.259_0::MAL13P1.259::hypothetical protein	0.204462	NA	0.237205	0.211484	0.418675	NA	0.171018	0.285452	0.189092	0.302383	NA	0.180473	NA	0.376191	0.668031
aPFD0585c_2	aPFD0585c_2::PFD0585c::hypothetical protein	1.54199	1.4755	1.24214	0.932697	0.821915	1.54338	1.53916	1.55727	0.87758	0.961205	1.35856	1.4757	1.14742	1.29666	1.2916
aPFD0020c_3	aPFD0020c_3::PFD0020c::erythrocyte membrane protein 1 (PfEMP1)	NA	0.0249204	0.0497366	NA	NA	NA	0.0194338	0.0395676	NA	NA	NA	NA	0.0140501	NA	NA
aPF14_0320_1	aPF14_0320_1::PF14_0320::hypothetical protein	2.01623	3.17112	2.3695	1.74474	1.66505	3.15533	2.96172	2.83615	1.97011	1.81767	2.73625	3.31849	2.91656	NA	1.38169
aPF08_0005_0	aPF08_0005_0::PF08_0005::hypothetical protein	0.23144	0.190018	0.343055	0.223685	0.202585	0.196974	0.168427	0.163923	0.137374	0.146968	0.265634	0.174334	0.189676	0.208106	0.629423
aPF11_0396_1	aPF11_0396_1::PF11_0396::Protein phosphatase 2C	1.32191	1.27198	0.68356	0.732059	1.33899	1.55086	1.46402	1.6251	0.706266	1.57104	1.07154	1.60584	2.04078	1.7769	0.920736
aPFI1345c_0	aPFI1345c_0::PFI1345c::hypothetical protein	NA	NA	0.540726	0.451436	0.702293	0.895111	0.611518	0.987778	0.622225	NA	NA	0.845889	1.04673	0.908461	NA
aPF13_0330_1	aPF13_0330_1::PF13_0330::ATP-dependent DNA helicase, putative	0.494117	0.485948	0.535625	0.512441	0.503567	0.57347	0.523418	0.520032	0.384648	0.481447	0.423213	0.543873	0.440236	0.500254	1.02369
aPF14_0649_0	aPF14_0649_0::PF14_0649::hypothetical protein	1.6641	1.78181	1.99202	1.6756	1.0901	2.00839	2.01853	2.01654	2.02344	1.70618	2.232	2.35228	2.86036	2.46658	2.47089
aPF14_0402_3	aPF14_0402_3::PF14_0402::hypothetical protein	1.04787	1.38827	1.94866	1.63358	1.36793	1.22423	1.56118	1.83283	2.45981	2.17411	1.31129	1.4757	2.22577	2.03036	1.93741
aPFF1365c_0	aPFF1365c_0::PFF1365c::null	2.18661	2.36536	3.31833	4.15375	4.49931	2.41979	2.54454	3.1753	5.3673	6.42943	2.12957	2.712	4.11316	4.48494	3.64784
aMAL13P1.200_0	aMAL13P1.200_0::MAL13P1.200::hypothetical protein, conserved	0.45862	0.397688	0.420848	NA	0.262395	0.493683	0.408111	0.315128	0.242426	0.255083	0.355679	0.503359	0.277489	0.509592	0.969873
ac11rRNA18s_0	ac11rRNA18s_0::c11rRNA18s::	1.4213	2.27295	2.43837	2.06061	2.07408	1.58951	1.35	1.27747	1.3689	1.10648	1.11319	1.07793	1.29495	0.931139	1.27172
aMAL8P1.92_1	aMAL8P1.92_1::MAL8P1.92::ATPase, putative	0.379107	0.338502	0.415747	0.38772	0.621259	0.388962	0.336853	0.385784	0.349093	0.530437	0.346675	0.402687	0.385207	0.562952	0.645802
aPFI0240c_3	aPFI0240c_3::PFI0240c::E1-E2_ATPase/hydrolase, putative	1.3716	1.68213	1.98819	0.985568	0.819985	2.06574	1.82548	1.53042	1.03112	0.881809	1.71649	1.94837	1.89208	1.17126	2.05557
aPFA0320w_0	aPFA0320w_0::PFA0320w::hypothetical protein	1.34036	1.30521	1.09038	0.713079	0.74281	0.733044	1.43422	1.37356	0.893742	0.866605	1.39683	1.50394	1.38628	1.09789	1.53729
aPF14_0088_0	aPF14_0088_0::PF14_0088::hypothetical protein	1.51075	1.5731	1.44619	1.08046	0.879796	1.9872	1.89933	1.74098	1.17496	1.04567	1.67034	1.78017	1.5982	1.03386	0.814272
aMAL8P1.33_1	aMAL8P1.33_1::MAL8P1.33::GTP-binding protein, putative	1.29493	1.54299	1.18603	1.03979	1.35249	1.61818	1.64799	NA	1.25738	1.54401	1.59268	1.76176	1.86281	1.59414	0.759285
aPF14_0360_1	aPF14_0360_1::PF14_0360::hypothetical protein	0.69006	0.697771	0.769005	0.786285	0.684929	0.791637	0.734599	0.674063	0.762832	0.826062	0.78452	0.67401	0.698992	0.983165	0.992101
aPFL0105w_1	aPFL0105w_1::PFL0105w::hypothetical protein	1.00101	0.899211	0.742223	0.760527	0.733163	0.736784	0.903026	0.935492	0.971318	0.897012	0.901579	0.812741	0.850031	0.888451	0.68207
aPF10_0184_2	aPF10_0184_2::PF10_0184::hypothetical protein	2.39107	2.75163	3.15764	2.25176	1.63804	2.81623	2.9086	3.50315	3.25658	2.46298	2.60681	2.64816	3.50433	3.55247	2.56917
aPFF0130c_1	aPFF0130c_1::PFF0130c::hypothetical protein	NA	NA	NA	0.211484	NA	NA	NA	0.330672	0.203637	NA	0.239746	0.31552	0.271635	0.28281	0.958173
aPFL1980c_1	aPFL1980c_1::PFL1980c::hypothetical protein	0.816429	0.960474	1.09931	NA	0.574954	1.32397	1.20619	NA	NA	0.645308	1.05128	1.21543	1.19777	0.600304	0.698449
aPFA0655w_0	aPFA0655w_0::PFA0655w::hypothetical protein	0.542393	NA	0.45018	0.394498	0.58846	0.281748	0.779945	0.628843	NA	0.684162	NA	NA	0.393403	0.410875	0.230476
aMAL13P1.296_4	aMAL13P1.296_4::MAL13P1.296::hypothetical protein	2.36268	2.74955	2.99567	3.43661	3.87612	2.2091	2.78681	3.28694	3.73982	3.86847	2.48188	3.01893	3.44227	4.12476	3.5367
aPFI1400c_0	aPFI1400c_0::PFI1400c::hypothetical protein	0.471399	0.530597	0.274189	0.252154	0.474627	0.503656	0.432727	0.462093	0.247274	0.439215	0.389446	0.395321	0.407453	0.362851	0.280783
aPFD0425w_0	aPFD0425w_0::PFD0425w::hypothetical protein	0.428803	0.410148	0.15176	0.177592	0.493921	0.198221	0.421066	0.62319	0.20687	0.555776	0.325289	0.515636	0.382865	NA	0.318221
aPFL1135c_0	aPFL1135c_0::PFL1135c::hypothetical protein	1.16288	1.28652	0.809814	0.534132	0.519002	1.15317	1.28263	0.958102	0.699802	0.695987	1.31916	1.40818	0.954235	0.917799	0.609534
aPFL1580w_1	aPFL1580w_1::PFL1580w::hypothetical protein	6.19208	5.36619	5.41236	6.61564	6.04667	3.70262	4.29876	5.50838	6.65377	5.09827	5.46913	4.43201	NA	5.69489	3.58467
aPFE1270c_1	aPFE1270c_1::PFE1270c::hypothetical protein	0.34503	0.361346	0.34433	0.31587	0.520932	0.352808	0.351105	0.284039	0.289294	0.432458	NA	NA	0.350081	0.349511	1.05294
aPF08_0107_1	aPF08_0107_1::PF08_0107::erythrocyte membrane protein 1 (PfEMP1)	0.488438	0.525405	0.474411	0.361962	0.360794	0.491189	0.458639	0.569491	0.263436	0.402051	0.420962	0.385499	0.454286	0.330834	0.390757
aPF13_0265_0	aPF13_0265_0::PF13_0265::hypothetical protein	1.32333	1.44538	1.52016	1.34889	1.6091	1.27161	1.54434	1.80315	1.38991	2.07614	0.975867	1.10248	1.61576	1.5141	1.21439
aMAL13P1.320_1	aMAL13P1.320_1::MAL13P1.320::hypothetical protein	0.610547	0.573169	0.594289	0.607337	0.80648	0.517369	0.557103	0.628843	NA	0.616591	0.641573	0.554923	NA	0.576292	0.857559
aMAL13P1.460_0	aMAL13P1.460_0::MAL13P1.460::null	1.72799	1.57725	1.46149	1.23094	1.93131	1.43367	1.34353	1.41454	1.09091	1.69098	1.31016	1.39836	1.19543	1.52477	0.878618
ac5rRNA18s_0	ac5rRNA18s_0::c5rRNA18s::	1.03509	0.667659	1.27785	1.3516	0.987841	0.840258	0.783831	0.705152	0.853338	0.614901	1.13795	0.541418	0.634596	0.522932	0.731207
aPF07_0116_0	aPF07_0116_0::PF07_0116::hypothetical protein	NA	1.30001	1.0534	0.87847	0.872078	1.43367	1.32798	1.2054	1.23314	1.4984	1.30566	1.52972	1.60405	1.7142	1.29745
aPFL0075w_0	aPFL0075w_0::PFL0075w::XPA binding protein 1, putative	0.410344	0.369653	0.420848	0.39721	0.592319	0.390209	0.389972	0.447962	0.363638	0.440904	0.353428	0.367084	0.364132	0.376191	0.387247
aPF11_0408_2	aPF11_0408_2::PF11_0408::hypothetical protein	1.42982	1.34882	1.35947	1.03166	0.872078	1.53465	1.49252	1.35802	1.32203	1.29062	1.63207	1.47693	1.74689	1.20194	1.14419
aMAL7P1.110_0	aMAL7P1.110_0::MAL7P1.110::hypothetical protein, conserved	1.40568	1.11	1.05085	0.905584	1.00135	1.39752	1.24636	1.06409	0.772529	0.814237	1.15033	1.27067	0.817247	0.73504	1.33255
aMAL8P1.15_0	aMAL8P1.15_0::MAL8P1.15::hypothetical protein	0.715618	0.780839	0.725645	0.596492	0.638624	0.786651	0.921164	0.734828	0.609296	0.59294	0.765386	0.875354	0.861739	0.566954	0.489031
aPF13_0093_0	aPF13_0093_0::PF13_0093::hypothetical protein	0.792291	0.986432	0.691212	0.615471	0.491991	0.784157	1.0857	1.02735	0.509094	0.728084	1.00738	1.09511	0.931989	NA	1.47762
aPF14_0276_0	aPF14_0276_0::PF14_0276::ribosomal protein L15, putative	1.37586	NA	1.12354	0.958454	0.874008	0.956198	1.23081	1.2266	1.12809	0.989923	1.14808	1.13194	1.18606	1.24863	0.610704
aPF14_0621_0	aPF14_0621_0::PF14_0621::hypothetical protein	0.336511	0.292815	0.339229	0.4189	0.501638	0.287981	0.309646	0.358935	0.55273	0.57098	0.323038	0.317976	0.303248	0.418879	0.207078
aPFL2270w_0	aPFL2270w_0::PFL2270w::hypothetical protein	1.07059	1.056	0.692487	0.661564	1.13447	0.760471	0.893956	0.722109	0.585054	0.918973	1.19985	1.07547	0.638108	0.737707	0.663351
aMAL8P1.151_1	aMAL8P1.151_1::MAL8P1.151::hypothetical protein, conserved	2.66227	2.84404	2.77632	3.076	2.96352	1.68052	3.04723	3.03399	3.52487	3.18938	3.20336	3.30253	3.02194	2.67202	1.72682
aPFI0035c_0	aPFI0035c_0::PFI0035c::rifin	0.161866	0.130832	0.239756	0.172169	0.167856	0.127161	0.15288	NA	0.0969702	0.130075	0.137319	0.103127	0.138159	0.121395	0.16496
aPFL0625c_0	aPFL0625c_0::PFL0625c::eukaryotic translation initiation factor 3 subunit 10, putative	0.604868	0.651045	0.632548	0.517864	0.476556	0.70437	0.647795	0.517206	0.454144	0.447662	0.584169	0.639634	0.622887	0.668339	0.793213
aPFL1325c_1	aPFL1325c_1::PFL1325c::hypothetical protein	1.23103	1.36647	NA	1.14282	0.962759	1.63189	1.68556	1.53042	1.36405	0.944313	1.41934	NA	1.72816	1.22729	0.748756
aMAL13P1.256_2	aMAL13P1.256_2::MAL13P1.256::phosphatidylinositol transfer protein, putative	0.955577	0.929323	1.40283	1.68509	1.57051	0.905085	0.893956	1.21247	1.62102	1.63523	0.879068	0.961293	1.27153	1.29399	NA
aPFL1585c_0	aPFL1585c_0::PFL1585c::hypothetical protein	0.505476	NA	0.522872	0.460926	NA	0.337848	0.48455	0.488943	0.389497	0.533815	0.574039	0.55615	0.443749	0.441557	0.50892
aMAL13P1.45_1	aMAL13P1.45_1::MAL13P1.45::hypothetical protein, conserved	0.930019	1.03004	1.11461	0.840512	0.727375	1.13323	NA	0.928426	0.984248	0.900391	NA	1.04969	1.14274	1.10056	1.15355
aPFE0375w_0	aPFE0375w_0::PFE0375w::cell differentiation protein rcd1, putative	1.75639	1.65824	1.97544	2.25311	2.4561	1.59449	1.65576	1.62793	2.18183	2.48157	1.58142	1.86488	1.9436	2.19711	2.42059
ac7rRNA5.8s_0	ac7rRNA5.8s_0::c7rRNA5.8s::	2.26328	1.52534	1.15542	0.995057	1.29268	1.57953	1.06238	1.18562	1.31395	1.24332	1.77614	0.949016	0.944869	1.1259	0.379058
aMAL7P1.95_0	aMAL7P1.95_0::MAL7P1.95::hypothetical protein	0.6929	NA	0.766454	0.989635	0.848926	0.799117	0.787718	0.963755	0.78061	0.95107	0.534644	0.713297	0.693138	1.02852	1.17461
aPFE1550w_1	aPFE1550w_1::PFE1550w::hypothetical protein	1.329	1.26367	0.979429	1.03166	0.964688	1.49351	1.31891	1.50922	1.48526	1.72814	1.26064	1.43396	1.49048	1.82226	1.29277
aMAL8P1.207_3	aMAL8P1.207_3::MAL8P1.207::	NA	NA	0.0369836	NA	NA	NA	0.0323897	0.0226101	NA	NA	NA	NA	NA	NA	NA
aPF10_0299_1	aPF10_0299_1::PF10_0299::hypothetical protein, conserved	0.627586	0.581476	0.544552	0.416189	0.466909	0.467502	0.459934	0.503074	0.33778	0.369954	0.472738	0.460389	0.392232	0.386863	NA
aMAL7P1.50_0	aMAL7P1.50_0::MAL7P1.50::erythrocyte membrane protein 1 (PfEMP1)	0.124949	NA	0.117327	NA	NA	0.119681	NA	0.269908	NA	0.0929109	NA	0.0564744	NA	NA	0.051477
aPF11_0392_4	aPF11_0392_4::PF11_0392::hypothetical protein	2.85821	2.91257	2.92681	2.37512	1.98147	2.84989	3.53696	4.30015	5.42225	3.44953	3.17185	3.0533	4.33445	5.01988	3.94501
aPF14_0655_1	aPF14_0655_1::PF14_0655::RNA helicase-1, putative	0.58073	0.474526	0.462933	0.303669	0.378158	0.564743	0.540261	0.426765	0.344244	0.337858	0.541398	0.514408	0.36179	0.384195	0.33577
aPF13_0204_1	aPF13_0204_1::PF13_0204::nuclear movement protein, putative	0.408925	0.391458	0.362185	0.340272	0.380087	0.513629	0.419771	0.388611	0.34586	0.35644	0.417585	0.421103	0.353594	0.345509	0.315881
aPFD0207c_1	aPFD0207c_1::PFD0207c::	1.26085	0.986432	0.775381	0.591069	0.559519	1.32147	1.05202	1.17007	0.97455	0.891945	1.15708	1.14054	0.963602	0.953817	0.728867
aPFC0875w_2	aPFC0875w_2::PFC0875w::hypothetical protein	0.441582	0.558632	0.855725	1.90064	3.35133	0.387715	0.47289	0.734828	1.43354	2.26196	0.410832	0.434608	0.6264	0.845762	0.941794
aPF13_0067_0	aPF13_0067_0::PF13_0067::hypothetical protein	2.16247	2.67271	2.23305	1.31499	1.48948	2.41979	2.86584	2.6044	1.85698	1.85822	2.04741	2.74392	2.60629	2.2398	1.47177
aPF08_0123_0	aPF08_0123_0::PF08_0123::hypothetical protein	1.06207	0.883636	1.21153	0.719858	0.690717	0.920045	0.905617	0.994844	1.05213	0.599698	1.49475	0.924462	0.823101	0.673675	0.458613
aPF13_0158_0	aPF13_0158_0::PF13_0158::hypothetical protein	0.660243	0.581476	0.633823	0.60327	0.667564	0.688163	0.612814	0.531337	0.543033	0.489894	0.579667	0.585615	0.504632	0.486914	0.465633
aPFL1165w_0	aPFL1165w_0::PFL1165w::hypothetical protein	0.91866	1.06223	1.5903	3.02313	3.79701	1.16065	0.956145	1.23931	2.29173	2.80929	NA	1.05705	1.37925	2.15042	2.33752
aPFE1370w_0	aPFE1370w_0::PFE1370w::hsp70 interacting protein, putative	0.653143	0.597051	0.563682	0.523286	0.542155	0.767951	0.623178	0.545468	0.45576	0.439215	0.584169	0.575794	0.440236	0.460233	0.472652
aPFC0815c_0	aPFC0815c_0::PFC0815c::hypothetical protein	0.57505	NA	0.739673	0.610049	1.61489	0.352808	0.689253	1.02452	0.97455	2.73158	NA	NA	0.785634	1.26064	1.54548
aPFE0515w_0	aPFE0515w_0::PFE0515w::hypothetical protein	NA	0.338502	0.561131	0.601915	0.528649	0.330368	NA	0.309475	0.481619	0.28549	0.649452	0.295877	0.37584	0.653665	0.966363
aPFE0385w_1	aPFE0385w_1::PFE0385w::hypothetical protein	0.948478	1.12661	1.24724	1.78677	2.69534	1.00233	1.02481	1.25627	1.80849	NA	0.900454	1.12335	1.33827	1.92498	1.63088
aPF08_0068_1	aPF08_0068_1::PF08_0068::hypothetical protein	1.49939	1.78285	1.74333	1.59833	1.43739	1.66057	1.54823	1.59825	1.6889	1.38691	1.34955	1.61443	1.97053	1.54345	1.00848
aPFL1725w_1	aPFL1725w_1::PFL1725w::ATP synthase beta chain, mitochondrial precursor, putative	1.31623	1.25433	1.01514	0.614116	0.621259	1.25041	1.2632	0.987778	0.60768	0.699366	1.42384	1.35416	0.934331	0.679011	0.740566
aPF14_0262_0	aPF14_0262_0::PF14_0262::hypothetical protein	0.69858	0.819258	0.742223	0.807976	1.40845	0.531083	0.738486	1.00474	0.386265	NA	0.468236	0.902363	0.96126	1.16993	1.06815
aPF08_0125_1	aPF08_0125_1::PF08_0125::tubulin gamma chain	1.46673	1.39866	1.58647	0.87847	0.827703	1.48728	1.65965	1.31845	0.934146	0.744976	1.43735	1.5997	1.34881	0.791068	0.892657
aPFA0350w_1	aPFA0350w_1::PFA0350w::	0.619066	0.566939	0.418298	0.319937	0.491991	0.503656	0.586902	0.494595	0.313537	0.383469	0.793525	0.635951	0.460141	0.488248	0.486691
aMAL7P1.146_2	aMAL7P1.146_2::MAL7P1.146::hypothetical protein	1.38722	1.46719	2.13485	1.17672	1.11904	1.93982	1.77884	1.75228	1.55799	1.03891	1.69285	1.80227	2.35339	1.58347	1.63673
aMAL8P1.98_1	aMAL8P1.98_1::MAL8P1.98::hypothetical protein	NA	NA	0.650402	0.436524	0.490062	0.746757	0.936711	0.837986	0.572124	0.603076	0.983746	1.01531	0.686113	1.0432	1.49985
aPFF0600w_0	aPFF0600w_0::PFF0600w::hypothetical protein	2.61115	2.86585	1.47935	1.20925	1.04186	2.18666	2.50308	2.53798	1.92809	1.66395	NA	2.95263	2.17542	2.13975	2.00292
aPF11_0148_0	aPF11_0148_0::PF11_0148::dynein light chain type 2, putative	0.268357	0.256472	0.312448	NA	0.414816	NA	0.255231	0.497422	NA	0.368265	0.288145	NA	0.286856	0.333502	1.01082
aPF14_0212_0	aPF14_0212_0::PF14_0212::hypothetical protein	3.16207	3.44525	3.42418	3.67385	2.67026	3.01695	3.33614	3.1315	5.02144	5.01043	2.83868	3.21536	3.20459	5.63619	5.59227
aPF13_0271_1	aPF13_0271_1::PF13_0271::ABC transporter, putative	0.935699	1.03627	1.1669	1.45056	1.69978	1.23296	1.0287	1.40324	2.0089	2.65556	1.30228	1.17491	1.35583	1.67685	1.11611
aPF14_0668_0	aPF14_0668_0::PF14_0668::hypothetical protein	0.871805	0.83068	0.613418	NA	0.455333	0.58469	0.827881	0.712218	0.612528	0.52368	0.864435	0.865532	0.653329	0.668339	0.622403
aPF14_0430_1	aPF14_0430_1::PF14_0430::hypothetical protein	0.550912	0.562786	0.508844	0.413478	NA	0.587183	0.721643	0.609059	0.402426	0.413876	0.908333	0.901136	0.629912	0.546944	0.288973
aPFC0380w_1	aPFC0380w_1::PFC0380w::dual-specificity protein phosphatase, putative	1.04503	1.04043	0.959024	0.668342	0.750528	0.962432	1.08182	1.08246	NA	0.716259	1.07492	1.08529	0.915598	0.865772	0.806082
aPFI0330c_1	aPFI0330c_1::PFI0330c::hypothetical protein	0.552332	0.548249	0.581536	0.508374	0.459192	0.791637	0.598562	0.535576	0.486467	0.456108	0.595425	0.62613	0.552637	0.649663	0.786194
aPF14_0520_0	aPF14_0520_0::PF14_0520::6-phosphogluconate dehydrogenase, decarboxylating, putative	1.32617	1.0695	1.11206	0.713079	0.544084	1.37882	1.23988	1.01321	0.743438	0.614901	1.16384	1.1123	0.769243	0.653665	0.621233
aPFD0875c_0	aPFD0875c_0::PFD0875c::hypothetical protein	0.403245	0.44026	0.466759	0.382297	0.449545	0.492436	0.446978	0.391437	0.389497	0.503408	0.366935	0.457934	0.442578	0.638991	1.30096
aPF07_0118_1	aPF07_0118_1::PF07_0118::hypothetical protein	1.52495	1.94068	1.86321	1.21061	1.13833	NA	2.01205	1.95153	1.53536	1.41731	1.80879	2.09201	2.16137	1.42472	1.26704
aPFD0260c_0	aPFD0260c_0::PFD0260c::sequestrin	NA	0.383151	0.427225	0.324004	0.362723	0.378989	0.395155	0.589275	0.218183	0.437526	0.35793	0.40146	0.414478	NA	1.33138
aPF11_0176_0	aPF11_0176_0::PF11_0176::hypothetical protein	3.26856	3.00498	1.96906	NA	1.10746	0.943731	2.85159	1.98686	1.56445	1.1521	2.90621	2.95877	1.9916	NA	1.22024
aPF11_0226_2	aPF11_0226_2::PF11_0226::hypothetical protein	0.847667	0.864946	0.672082	0.721213	2.00462	0.676943	0.698322	1.19975	0.882429	1.76193	NA	0.812741	0.76573	0.907127	0.489031
aPFL1320w_1	aPFL1320w_1::PFL1320w::hypothetical protein	2.18803	NA	2.96634	2.00232	1.57051	3.78739	3.04075	3.25161	3.22103	2.43764	2.20161	3.14538	3.66942	2.71738	1.86604
aPF07_0106_1	aPF07_0106_1::PF07_0106::hypothetical protein	0.34503	0.290738	0.418298	0.528709	0.764033	0.269281	0.330375	0.390024	0.502629	0.606455	0.310656	0.320431	0.311444	0.364185	0.813102
aMAL8P1.215_0	aMAL8P1.215_0::MAL8P1.215::	0.292495	NA	0.168339	NA	0.264325	0.255568	0.235797	0.418286	NA	NA	0.120436	NA	NA	0.220112	NA
aPF11_0056_1	aPF11_0056_1::PF11_0056::hypothetical protein	0.718458	0.452721	NA	NA	0.457262	0.61087	NA	0.651453	NA	NA	0.442348	0.543873	NA	0.285478	0.381398
aPFL1310c_1	aPFL1310c_1::PFL1310c::ATP-dependent RNA helicase, putative	0.836308	0.691541	0.767729	0.519219	0.542155	0.850231	0.733303	0.618951	0.536568	0.57098	0.805906	0.798008	0.787976	0.744378	0.793213
aPFI0395w_2	aPFI0395w_2::PFI0395w::hypothetical protein	1.58316	3.1057	1.66809	NA	2.41365	1.86627	2.25044	2.47863	2.07678	3.29749	2.06992	NA	2.85802	3.62184	2.36092
aPFL1280w_0	aPFL1280w_0::PFL1280w::hypothetical protein	0.817849	0.819258	0.666981	0.60327	0.690717	0.654503	0.774762	0.780048	0.612528	0.619969	0.756381	0.903591	0.715384	1.00051	1.53495
aPF10_0161_1	aPF10_0161_1::PF10_0161::hypothetical protein	0.455781	0.414302	0.49354	0.604626	0.688788	0.514876	0.502689	0.558186	0.588286	0.719637	0.401827	0.484943	0.502291	0.999174	1.15355
aMAL13P1.296_0	aMAL13P1.296_0::MAL13P1.296::hypothetical protein	2.5359	NA	1.95503	2.43884	3.77772	2.40608	2.90082	3.32933	3.36163	4.95468	2.08005	3.09382	3.74903	4.48894	2.53641
aPF10_0188_1	aPF10_0188_1::PF10_0188::hypothetical protein	2.82698	2.20961	2.85922	2.72624	2.11267	3.01196	2.45385	2.86018	3.08527	2.46298	NA	2.67885	3.04887	2.96417	2.09535
aPFL0330c_0	aPFL0330c_0::PFL0330c::DNA-directed RNA polymerase III subunit, putative	0.369168	0.369653	0.339229	0.355184	0.385875	0.339095	0.32908	0.402742	0.318385	0.314208	0.315159	0.338847	0.332519	0.388197	0.560397
aMAL13P1.163_0	aMAL13P1.163_0::MAL13P1.163::er lumen protein retaining receptor 1, putative	2.32576	2.14731	1.75353	1.25128	0.850855	2.68783	2.22582	1.86674	1.6695	1.15716	2.25001	2.31177	1.59586	1.34335	0.753436
aPF10_0242_1	aPF10_0242_1::PF10_0242::hypothetical protein	0.738336	0.762149	0.996008	0.848646	1.04379	0.820311	0.853793	0.743306	0.690105	0.758491	0.819413	0.796781	0.89101	0.622983	0.989762
aPFI0120c_1	aPFI0120c_1::PFI0120c::hypothetical protein	0.0937119	0.086183	0.172165	0.427034	1.0901	0.0785404	0.0803265	0.152618	0.273133	0.550708	0.0776641	0.0834839	0.135818	0.272138	0.366188
aPFF1295w_0	aPFF1295w_0::PFF1295w::hypothetical protein, conserved	0.629005	0.549287	0.525423	0.363318	0.418675	0.72307	0.585606	0.453615	0.376568	0.315897	0.67534	0.547556	0.364132	0.350845	0.418835
aPFA0665w_0	aPFA0665w_0::PFA0665w::hypothetical protein	0.773833	NA	0.692487	0.493462	NA	NA	1.13364	0.994844	0.316769	NA	1.03327	1.16386	NA	0.573624	NA
aPFD0165w_0	aPFD0165w_0::PFD0165w::ubiquitin-specific protease, putative	1.31623	1.32286	1.67192	1.35566	1.44317	1.68052	1.4692	1.45128	1.64849	1.45786	1.53077	1.66231	1.53731	1.33268	1.0974
aPF14_0245_1	aPF14_0245_1::PF14_0245::hypothetical protein	1.13164	1.15153	1.25999	1.02217	0.83542	1.36137	1.15955	1.34247	1.17657	1.13351	1.49475	1.13931	1.29963	1.20995	1.09506
aPFL0220c_0	aPFL0220c_0::PFL0220c::hypothetical protein	1.18702	1.22318	0.938619	1.34211	2.01813	1.27036	1.20101	NA	1.26384	2.28899	0.854305	1.36889	1.56424	1.47408	3.00438
aMAL7P1.35_1	aMAL7P1.35_1::MAL7P1.35::hypothetical protein	0.80507	0.847294	0.580261	0.671054	0.729304	NA	1.02611	0.922774	0.622225	0.804102	0.930844	1.25103	0.882814	0.965823	1.42381
aPF11_0128_0	aPF11_0128_0::PF11_0128::hypothetical protein, conserved	1.45111	1.55753	1.42451	1.20654	1.20972	1.58078	NA	1.52053	1.25415	0.97303	1.35631	1.52481	1.45887	1.01518	1.19918
aPF11_0407_1	aPF11_0407_1::PF11_0407::adrenodoxin reductase, putative	0.884583	0.696733	0.637649	0.595137	0.74474	0.812831	0.881001	0.806897	0.686872	0.744976	0.857682	0.806602	0.715384	0.601639	0.563907
aPFE1275c_1	aPFE1275c_1::PFE1275c::RNA methyltransferase, putative	0.853346	0.770456	0.733296	0.629028	0.870149	0.716837	0.755328	0.621777	0.60768	0.873362	NA	0.755039	0.572541	0.596302	1.57824
aPFI0975c_5	aPFI0975c_5::PFI0975c::hypothetical protein	3.94158	4.01115	3.29282	2.86858	1.93324	4.05792	3.7883	4.21819	NA	3.69448	3.62883	4.78928	4.8344	4.26083	2.32114
aPF14_0611_1	aPF14_0611_1::PF14_0611::hypothetical protein	0.35071	0.337464	0.396618	NA	0.385875	0.294215	0.277256	0.394263	NA	0.277043	0.325289	NA	0.317298	0.278808	0.278444
aPFI0405w_0	aPFI0405w_0::PFI0405w::hypothetical protein	3.46308	3.38398	3.24691	2.49578	1.90044	2.73146	3.1418	2.86865	3.13699	2.51197	3.36207	2.96859	2.76787	2.00102	1.53963
aPFB0932w_0	aPFB0932w_0::PFB0932w::hypothetical protein	0.159026	0.147446	0.159412	0.207417	0.393593	0.168301	0.171018	0.141313	0.158385	0.201025	0.158705	0.147325	0.151038	0.230784	0.357999
aPFC0840w_0	aPFC0840w_0::PFC0840w::P-type ATPase, putative	2.01339	2.08397	2.32487	1.90335	1.87343	2.16796	2.38647	2.78104	2.9188	2.71469	1.76714	2.60028	3.12849	2.41056	2.21234
aPF13_0184_0	aPF13_0184_0::PF13_0184::hypothetical protein	0.289655	0.287623	0.335403	0.355184	0.459192	0.289228	0.259118	0.305236	0.286062	0.408808	0.24875	0.261501	0.288027	0.350845	0.483181
aPFC0140c_0	aPFC0140c_0::PFC0140c::N-ethylmaleimide-sensitive fusion protein, putative	1.52211	1.3862	1.46914	1.4492	1.47404	1.36261	1.53139	1.35802	1.19112	1.37001	NA	1.24858	1.12049	1.3847	2.58204
aPFE1270c_2	aPFE1270c_2::PFE1270c::hypothetical protein	0.293915	0.343694	0.34433	0.30638	0.486203	0.356548	0.354991	0.29817	0.28283	0.418944	NA	0.34253	0.289198	0.341507	1.2413
aPFE0570w_12	aPFE0570w_12::PFE0570w::hypothetical protein	1.06775	0.938668	1.02151	0.929985	0.856643	1.20678	1.07145	1.10789	1.03758	0.99668	0.918463	0.97357	1.11581	0.883115	0.711318
aPF14_0569_1	aPF14_0569_1::PF14_0569::hypothetical protein	1.08195	1.11103	1.22429	1.06691	0.792974	1.17312	1.22563	1.04148	1.02465	0.827752	0.998378	1.03127	1.06429	0.99784	1.40041
aPF14_0074_1	aPF14_0074_1::PF14_0074::hypothetical protein	NA	NA	0.200222	NA	NA	NA	NA	0.353282	NA	NA	NA	NA	0.19553	0.154745	0.270254
aMAL13P1.298_1	aMAL13P1.298_1::MAL13P1.298::hypothetical protein	1.17992	1.71224	NA	1.22281	1.45475	1.41871	1.44588	1.66184	1.79395	2.10148	1.29215	2.0208	1.78085	1.59281	1.58058
aPF14_0095_1	aPF14_0095_1::PF14_0095::hypothetical protein	0.866125	0.882598	0.956473	0.809331	0.598107	0.941238	0.747555	0.671237	0.473538	0.567601	0.660708	0.644545	0.642792	0.494918	0.527639
aPF11_0390_0	aPF11_0390_0::PF11_0390::reticulocyte binding protein, putative	0.92434	0.972934	NA	NA	3.56935	1.09333	1.25543	1.70565	NA	NA	0.930844	1.29523	1.9354	2.17844	1.494
aPF14_0545_0	aPF14_0545_0::PF14_0545::thioredoxin	2.77018	2.12654	1.43726	0.925919	0.536367	2.78008	2.28412	1.67173	1.37213	0.826062	2.23875	2.26512	1.21182	0.985833	0.535828
aPFL1400c_0	aPFL1400c_0::PFL1400c::hypothetical protein	0.359229	0.316697	0.354533	0.29689	0.355005	0.385222	0.375721	0.344804	0.274749	0.304072	0.33767	0.336391	0.302077	0.252128	0.274934
aMAL7P1.127_1	aMAL7P1.127_1::MAL7P1.127::hypothetical protein	1.72941	1.71328	1.15542	0.767306	0.698434	NA	1.68556	1.83707	1.16849	NA	2.56629	2.37929	2.07824	1.29933	0.960513
aMAL13P1.137_5	aMAL13P1.137_5::MAL13P1.137::hypothetical malaria antigen	2.74888	2.63741	2.87325	2.13653	1.67856	3.19647	2.96949	3.43956	3.15638	2.45623	2.93886	3.42898	3.51955	3.06556	1.9456
[truncated: 8,204 more rows]
