# Supplementary material for: Role of Calcium Signaling in the Transcriptional Regulation of the Apicoplast Genome of Plasmodium falciparum
Source: Biomed Res Int. 2014 Apr 27;2014:869401. doi: 10.1155/2014/869401 (PMC4022301; doi:10.1155/2014/869401)
Supplement: Supplementary file 1 — The supplementary material contains three dataset representing the three featured microarray based genomic studies: Dataset 1 (Transcriptional responses to Ionomycine DS1). This table contains results from the analysis of genome-wide gene expression responses of P. falciparum to Ionomycine and to A23187 as described in Figure 1. Briefly, P. falciparum cultures were treated by both compounds for 30 min, 1.0, 2.0, 4.0 and 6.0 hours and the cell samples were collected for total RNA isolations from both the treatment experimental courses (Inono-30 mins, Iono-1 h, e.t.c.) and untreated control cultures (ctrl-30mins, e.t.c.). The table summarizes relative mRNA levels of all P. falciparum genes determined by two channel competitive microarray hybridization were each sample was hybridized against an arbitrary RNA pool (for more details see materials and methods). Dataset 2 (CGH-DS2). This table contains results from microarray based comparative genomic hybridization (CGH) measuring the copy number of each gene in all time points from the ionophore treatment time courses as described for Dataset 1. The final findings from these the CGH experiment is featured in Figure 2 (a). Dataset 3 (Schizonts_IonomycineEGTA_DS3). This table summarizes results from genome-wide gene expression analyses of P. falciparum response to Inonomycine in the presence and absence of external calcium chelator EGTA. Briefly, the cells were treated for 30 min, 1.0, 2.0, 4.0 and 6.0 hours with Inonomycine of with Inonomycine+EGTA. Total RNA was isolated and subjected to a microarray analysis of mRNA expression levels for all P. falciparum genes using CGH as described in materials and methods. The labels of the experimental time points are analogous to the dataset 1. The findings from these experiments are described in Figure 2 (c). [file 869401.f1.zip › 871435.xls]

## Sheet: CGH-IonoA23together-Oct2008
UNIQID	NAME	Iono-30 mins	Iono-1 hour	Iono-2 hours	Iono-4 hours	Iono-6 hours	A23-30 mins	A23-1 hour	A23-2 hours	A23-4 hours	A23-6 hours
aPFL1450c_0	aPFL1450c_0	0.899823	0.899823	0.892431	1.07012	0.913162	0.830593	0.921007	0.815096	0.905999	0.924943
aMAL8P1.96_0	aMAL8P1.96_0	1.08847	1.08847	1.05821	1.09068	0.967742	0.935669	0.956073	0.928638	1.06254	0.996793
aMAL13P1.295_2	aMAL13P1.295_2	0.900766	0.900766	0.895409	1.00845	0.905815	0.968692	0.921007	0.76248	0.900129	0.949231
aPFL0865w_0	aPFL0865w_0	0.972451	0.972451	0.971846	1.04523	0.922609	0.977699	1.0128	0.941561	0	0.953279
aPF11_0363_0	aPF11_0363_0	1.04225	1.04225	0.995671	0.889423	1.09684	1.08377	1.03652	1.06526	0.995034	1.04031
aPF14_0595_0	aPF14_0595_0	0.883789	0.883789	0.979788	0.95759	0.941502	0.953681	0.984952	0.972023	0.933395	0.916848
aPF10_0094_0	aPF10_0094_0	1.10167	1.10167	0.880519	0.892669	1.05486	1.18385	1.08293	1.14095	1.02928	1.0565
aMAL7P1.132_0	aMAL7P1.132_0	0.94887	0.94887	0.937102	1.09284	0.830243	0.855611	1.01899	0.908329	0.93633	0.960362
aPFE0500c_0	aPFE0500c_0	1.07809	1.07809	1.07211	0.890505	1.32776	1.31394	1.01796	1.27388	0.999926	1.06055
aPF11_0378_1	aPF11_0378_1	0.927176	0.927176	1.02545	1.01061	0.983486	0.930665	1.03755	0.892637	0.956876	0.967446
aPF14_0669_0	aPF14_0669_0	1.02055	1.02055	1.04729	1.14045	0.956197	0.885633	0.973607	0.954484	1.08309	0.934051
aMAL8P1.219_0	aMAL8P1.219_0	1.15638	1.15638		0.943524	1.206	1.24789	0	0	0.794462	0.971494
aPFL0535c_1	aPFL0535c_1	0.980939	0.980939	1.02942	1.03333	0.961445	0.967691	1.02002	0.9711	0.997969	0.936075
aPFL1795c_1	aPFL1795c_1	0.92529	0.92529	0.986737	1.09609	0.826045	0.784561	1.01692	0.89356	1.01656	0.853093
aMAL8P1.109_0	aMAL8P1.109_0	1.03187	1.03187	0.882504	1.06687	0.995032	1.01573	0.922039	0.927714	0.988185	0.945183
aPFL0570c_1	aPFL0570c_1	0.839458	0.839458	0.994678	0.945688	1.09055	1.15382	0.950917	1.14834	1.10853	1.00793
aPFE1180c_2	aPFE1180c_2	0.941325	0.941325	0.966883	1.20321	0.778812	0.872623	1.03136	0.765249	0.951984	0.90774
aMAL13P1.293_0	aMAL13P1.293_0	0.913971	0.913971	0.916256	0.889423	0.933105	1.01172	0.996297	0.926791	0.903064	0.999829
aPF13_0165_0	aPF13_0165_0	1.07432	1.07432	1.01255	0.948934	0.999231	1.07577	1.0654	0	1.04689	1.02513
aPFL0620c_1	aPFL0620c_1	0.986599	0.986599	0.956956	1.06038	0.916311	0.894639	1.0128	0.868636	0.955898	1.04739
aPF13_0319_0	aPF13_0319_0	0.943211	0.943211	0.895409	0.975985	1.00343	0.913653	0.941634	0.930484	0.871755	0.961374
aPFF0835w_1	aPFF0835w_1	1.04413	1.04413	0.990708	0.993297	0.951998	1.02874	1.00558	1.03572	1.04591	0.950243
aPFF0095c_1	aPFF0095c_1	1.00263	1.00263	0.944051	1.0355	0.935204	0.982702	0.931321	0.936945	1.01362	0.961374
aPFE1440c_0	aPFE1440c_0	1.05357	1.05357	1.08204	1.06471	1.0727	1.15282	1.02414	1.07818	1.1643	0.951255
aPFB0615c_1	aPFB0615c_1	0.979053	0.979053	0.990708	0.985723	0.826045	0.869621	0.954011	0.923099	0.938287	0.893572
aPF14_0170_4	aPF14_0170_4	0.959246	0.959246	0.963905	0.971657	0.989784	1.01272	0.999391	0.984947	0.89328	1.00084
aMAL13P1.380_0	aMAL13P1.380_0	0.932836	0.932836	1.01453	1.14153	0.889021	0.851608	1.06952	0.886175	1.11244	0.952267
aPFL1430c_0	aPFL1430c_0	0.980939	0.980939	1.05623	1.17616	1.02862	0.969693	1.08912	1.03295	1.04298	0.991734
aPF14_0529_1	aPF14_0529_1	0.964905	0.964905	0.982766	1.09934	1.04331	0.986705	1.10665	1.02002	1.04102	1.00894
aPFF0275c_2	aPFF0275c_2	1.063	1.063	1.03836	1.14478	0.959345	1.02874	0.975669	1.01449	1.14179	1.0393
aPF14_0714_0	aPF14_0714_0	0.937552	0.937552	0.995671	1.37092	0.968792	0.883631	1.13862	0.897252	1.14571	0.998817
aMAL13P1.258_1	aMAL13P1.258_1	1.04036	1.04036	0.918241	0.887259	1.08215	1.08177	0	1.08741	0.983293	1.05245
aPF11_0131_0	aPF11_0131_0	0.907369	0.907369	0.970854	1.05605	0.881674	0.96569	1.02311	0.914791	1.02047	0.925955
aPF07_0035_0	aPF07_0035_0	0.970564	0.970564	0.962912	1.04091	0.942552	0.877627	0.960199	0.896329	1.0058	0.97959
aMAL7P1.229_1	aMAL7P1.229_1	0.942268	0.942268	1.03736	1.20646	0.91946	0.790565	0.973607	0.86679	0.971552	1.02007
aPF14_0035_2	aPF14_0035_2	0.965848	0.965848	0.999642	1.03333	1.079	1.04975	1.04271	1.03479	1.12027	1.01906
aPF14_0715_0	aPF14_0715_0	0.980939	0.980939	1.11777	1.01927	0.970891	0.935669	0.928227	0.981254	0.993077	1.01703
aPF13_0020_1	aPF13_0020_1	1.01867	1.01867	0.989715	1.00412	1.10629	1.01573	0.988046	1.01079	1.00873	1.07067
aPF14_0266_0	aPF14_0266_0	0.973394	0.973394	0.978795	1.01602	0.9457	0.968692	0.963293	0.967408	0.998947	0.935063
aPFI0500w_1	aPFI0500w_1	0.914915	0.914915	0.944051	1.00736	0.903716	0.910651	0.911725	0.914791	0.882518	0.937087
aPFC0430w_1	aPFC0430w_1	1.00546	1.00546	1.08799	1.05497	0.928907	0.938671	1.06437	0.933253	1.00677	0.994769
achr11tRNALeu1_0	achr11tRNALeu1_0	1.09318	1.09318	1.03935	0.933786	1.03177	0.949679	1.05508	0.924022	0.909913	1.05549
aPFB0455w_0	aPFB0455w_0	1.07903	1.07903	1.16443	0.986805	1.24904	1.14482	1.09943	1.14003	1.04885	1.11013
aMAL13P1.28_1	aMAL13P1.28_1	1.00829	1.00829	0.963905	1.0474	1.04122	1.01272	0.955042	1.01079	1.01852	0.999829
bHB3vsa_5	bHB3vsa_5	1.14034	1.14034	1.0195	0.905653	1.04646	1.13481	1.1015	1.23049	0.9422	1.09799
aPFE1510c_1	aPFE1510c_1	0.999804	0.999804	0.977803	0.92513	0.937304	1.07377	1.14275	0.969254	0.934373	1.04436
aMAL13P1.308_0	aMAL13P1.308_0	1.05545	1.05545	1.1277	1.01818	1.11154	1.10679	1.01589	1.06249	1.01167	1.14353
bDd2var_109	bDd2var_109	1.01018	1.01018		1.04848	1.12623	1.04775	1.04477	1.09849	1.10853	1.13139
aPFL1930w_4	aPFL1930w_4			1.04531	0.929458	1.0811	1.03474	0.918944	1.07818	0.956876	1.02614
aPF14_0506_0	aPF14_0506_0	0.936608	0.936608	1.0592	1.05714	1.04017	0.977699	0.987014	0.990485	0.998947	0.988698
aPF11_0330_0	aPF11_0330_0	1.0281	1.0281	0.956956	1.03009	0.879575	0.918656	1.03961	0.839097	0.879582	0.941135
bDd2var_23	bDd2var_23	0.97528	0.97528	0.959934	0.766072	1.10839	1.15282	1.16957	1.1631	0.924589	0.995781
aPFI1750c_0	aPFI1750c_0	0.923404	0.923404	0.962912	1.08094	1.10419	0.974696	1.00867	0.953561	1.08113	1.03019
aMAL8P1.102_1	aMAL8P1.102_1	0.929063	0.929063	0.898387	0.833158	0.950948	1.02173	0.947823	0.98587	0.909913	0.91786
aPF07_0096_0	aPF07_0096_0	1.01018	1.01018	1.01056	0.980313	1.01288	0.964689	1.04374	1.00249	0.967639	1.0565
aMAL13P1.348_0	aMAL13P1.348_0	0.952643	0.952643	0.894416	0.943524	0.922609	1.01873	1.02724	0.948023	0.974487	0.992746
aMAL7P1.115_1	aMAL7P1.115_1	0.950757	0.950757	0.975817	1.06255	0.97404	0.911651	0.992171	0.915714	1.00188	0.986674
aPFB0745w_1	aPFB0745w_1	1.04508	1.04508	1.0056	0.842896	1.07165	1.02073	1.00558	1.05695	0.891323	1.03221
aMAL13P1.295_3	aMAL13P1.295_3	0.964905	0.964905	0.922212	1.12639	1.02022	1.08678	1.0128	0.9711	1.11636	0.991734
aPFL2540w_0	aPFL2540w_0	0.900766	0.900766	0.955963	1.03117	0.988734	1.00272	1.118	0.998793	1.11831	1.02918
aPF07_0035_1	aPF07_0035_1	1.07998	1.07998	1.1009	1.12963	1.0916	1.1258	0.984952	1.05418	1.07331	1.07472
aMAL7P1.124_0	aMAL7P1.124_0	0.927176	0.927176	0.907321	1.07337	0.873277	0.804575	0.901411	0.804019	0.880561	1.01197
aPFL1295w_1	aPFL1295w_1	1.02904	1.02904	1.12174	0.896997	0.97509	1.08077	1.03755	1.0911	0.986228	1.0312
aPFL0980w_1	aPFL0980w_1	1.146	1.146	1.12274	0.900243	1.2039	1.19385	1.10872	1.22126	1.09972	1.07573
aPFC0965w_2	aPFC0965w_2	1.04791	1.04791	1.04431	0.938114	0.997131	1.00972	0.943697	0.981254	0.896215	0.991734
aPFL1720w_0	aPFL1720w_0	1.01207	1.01207	0.997656	1.06363	0.995032	0.961687	1.0293	0.979408	1.02145	0.949231
aMAL7P1.207_3	aMAL7P1.207_3	1.15921	1.15921	1.13068	1.00953	1.20076	1.21887	1.1149	1.2028	1.0645	1.22348
aPF13_0165_1	aPF13_0165_1	0.895107	0.895107	1.08402	0.972739	0.961445	0.866619	0.936478	1.06341	0.928503	1.08281
aPFF0325c_0	aPFF0325c_0	1.0979	1.0979	1.03736	0.891587	1.08845	1.17984	1.05612	1.15849	1.00286	0.98971
achr13MALr.2_0	achr13MALr.2_0	0.947927	0.947927	0.93611	0.984641	0.899517	0.932666	0.951948	0.858482	0.965682	0.957326
aPF08_0030_1	aPF08_0030_1	1.04413	1.04413	1.03736	1.07445	1.04541	1.12981	1.05302	1.1631	1.22691	0.993757
aMAL13P1.312_0	aMAL13P1.312_0	0.862095	0.862095	0.929161	0.913227	0.89322	0.870622	0.930289	0.934176	0.923611	0.925955
aPF13_0031_1	aPF13_0031_1	0.942268	0.942268	0.962912	1.19564	0.918411	0.877627	0.997328	0.857559	0.99112	0.96947
aPFI0235w_1	aPFI0235w_1	0.991315	0.991315	0.91427	0.92513	0.895319	0.99371	1.07468	0.92033	0.855122	0.932027
bDd2var_141	bDd2var_141	1.02527	1.02527	0.943058	0.937032	0.944651	0.920658	0.951948	0.908329	0.926546	1.05448
aPF11_0127_2	aPF11_0127_2	0.916801	0.916801	0.866621	1.029	0.848087	0.8396	0.946791	0.835405	0.973509	0.963398
aPFF0710w_0	aPFF0710w_0	0.985655	0.985655	0.964898	0.898079	0.996082	1.07277	1.01074	0.962792	0.87469	0.982626
aPFI0190w_0	aPFI0190w_0	0.964905	0.964905	1.0056	0.982477	0.950948	0.980701	1.05715	0.898175	0.897194	0.935063
aPFC0125w_0	aPFC0125w_0	0.945097	0.945097	0.933131	1.03982	0.902666	0.910651	0.985983	0.875098	0.925567	0.994769
aPFC0320w_1	aPFC0320w_1	0.980939	0.980939	0.933131	1.0593	0.793507	0.891637	1.06127	0.831712	0.884474	0.944171
aMAL13P1.79_1	aMAL13P1.79_1	0.976223	0.976223	0.966883	1.03441	1.02127	1.00072	0.979795	0.952638	1.00188	1.01096
aMAL8P1.113_4	aMAL8P1.113_4	0.941325	0.941325	0.896402	1.09393	0.794556	0.868621	0.940603	0.818789	0.906978	0.910776
aPFF1020c_0	aPFF1020c_0	0.921517	0.921517	0.956956	1.20537	0.832342	0.956684	0.939572	0.849251	1.03026	0.988698
aPFC1045c_1	aPFC1045c_1	0.937552	0.937552	0.913278	1.03333	0.981387	0.944675	0.975669	0.915714	0.955898	0.942147
bHB3vsa_178	bHB3vsa_178	0.954529	0.954529	1.02049	1.01927	1.10524	0.919657	0.988046	1.0191	0.982315	1.03221
aPFF1565c_0	aPFF1565c_0	1.13374	1.13374	1.32028	0.944606	1.18501	0	0	1.3108	1.09483	1.23157
aPF14_0531_1	aPF14_0531_1	0.994144	0.994144	0.964898	1.14586	0.817648	0.822588	0.956073	0	1.00286	0.896608
aPFA0310c_0	aPFA0310c_0	0.985655	0.985655	1.04828	0.999789	1.06641	1.00972	0.982889	1.03941	1.0058	1.07067
aMAL13P1.73_1	aMAL13P1.73_1	0.845117	0.845117	0.856694	1.15235	0.760969	0.846605	0.902443	0.795711	0.951984	0.891548
aPF11_0291_1	aPF11_0291_1	1.04319	1.04319	0.946036	0.970575	1.05486	1.02974	1.05096	1.02556	1.01754	1.0059
aMAL13P1.45_0	aMAL13P1.45_0	0.981883	0.981883	0.951	0.964082	0.968792	1.01172	0.848812	1.0311	1.03026	0.863213
aPFB0615c_0	aPFB0615c_0	0.997917	0.997917	1.05722	0.937032	0.959345	0.929664	1.03136	0.972023	0.938287	0.943159
aPF10_0333_1	aPF10_0333_1	0.997917	0.997917	0.907321	0.903489	1.02442	1.02974	0.987014	1.04772	1.03613	0.953279
aPF14_0596_1	aPF14_0596_1	0.938495	0.938495	1.01453	1.09393	0.818697	0.977699	0.912756	0.883406	1.02536	0.915836
aPF14_0555_0	aPF14_0555_0	0.94887	0.94887	0.932139	1.16317	0.778812	0.842602	0.950917	0.808635	1.01265	0.90774
aPF14_0260_0	aPF14_0260_0	0.912085	0.912085	1.01552	0.85047	1.11049	1.24789	0.969481	1.12895	1.00873	0.96441
aPFL0130c_1	aPFL0130c_1	0.997917	0.997917	0.953978	0.993297	0.999231	0.983703	1.03343	0.945253	0.977423	1.02816
aPF11_0164_0	aPF11_0164_0	0.94887	0.94887	0.968868	1.13721	0.78511	0.838599	0.969481	0.78925	0.881539	0.889524
aPF13_0235_5	aPF13_0235_5	1.03753	1.03753	0.979788	0.931622	1.06955	1.04575	0.937509	1.02095	0.915783	0.999829
aPFL1875w_0	aPFL1875w_0	1.10073	1.10073	1.05325	0.998707	1.02442	1.07977	1.01796	1.06987	1.01656	0.951255
aMAL8P1.13_1	aMAL8P1.13_1	0.950757	0.950757	1.08799	1.10475	1.03177	0.955683	1.00145	1.04126	1.0283	1.01096
aPFF1300w_0	aPFF1300w_0	1.19222	1.19222	1.05225	0.879685	1.19341	1.21387	1.04065	1.1391	0.967639	1.08787
aPF10_0359_0	aPF10_0359_0	0.967735	0.967735	0.961919	1.14586	0.743125	0.775554	0.950917	0.783711	0.96079	0.848033
aPFB0655c_0	aPFB0655c_0	1.08564	1.08564	1.03339	0.988969	1.02967	0.987706	0.940603	1.02741	0.963725	0.963398
aPFE1150w_2	aPFE1150w_2	0.942268	0.942268	0.896402	0.978149	1.0916	1.04174	0.942666	0.949869	0.920675	0.990722
aPF11_0375_1	aPF11_0375_1	0.934722	0.934722	0.94008	1.06146	0.814499	0.912652	0.951948	0.812327	0.953941	0.915836
aPF13_0310_0	aPF13_0310_0	0.976223	0.976223	0.970854	1.04415	0.886922	0.915654	0.995265	0.890791	0.945135	1.01501
aPFE0415w_0	aPFE0415w_0	0.996974	0.996974	1.02347	0.998707	1.02337	1.08578	1.09428	1.04495	0.922632	1.08382
aPF11_0348_0	aPF11_0348_0	0.94887	0.94887	0.971846	1.00845	0.921559	0.926662	1.1149	0.982177	0.963725	0.956314
aPF10_0220_0	aPF10_0220_0	0.987542	0.987542	0.986737	1.06904	0.879575	0.904646	1.02724	0.882483	0.956876	0.930003
aPF14_0217_1	aPF14_0217_1	0.982826	0.982826	0.970854	0.978149	1.05906	1.08578	0.976701	0.975716	1.01754	1.01197
aPF13_0058_0	aPF13_0058_0	1.05923	1.05923	1.0185	0.985723	1.09265	1.04675	1.07674	1.11141	1.04885	1.0393
aPFA0130c_0	aPFA0130c_0	0.953586	0.953586	1.05325	1.21511	0.988734	0.971694	1.02414	1.08095	1.1868	1.06763
aMAL13P1.164_0	aMAL13P1.164_0	1.04602	1.04602	1.08501	0.903489	1.04122	1.07077	0.933383	1.06156	0.877626	1.06156
aPF10_0114_1	aPF10_0114_1	0.958302	0.958302	0.916256	0.966247	1.02757	1.1188	0.981858	1.08187	1.03123	1.01703
aMAL8P1.98_0	aMAL8P1.98_0	0.821537	0.821537	0.864636	1.11773	0.850186	0.794568	0.957105	0.800327	0.937308	0.943159
aPF10_0023_0	aPF10_0023_0	0.986599	0.986599	0.906329	1.00195	0.940452	0.972695	0.982889	0.914791	0.948071	1.05346
aPFE0040c_1	aPFE0040c_1	1.09601	1.09601	0.969861	1.12422	0.818697	0.940672	1.04271	0.889867	0.965682	0.915836
aPF10_0040_0	aPF10_0040_0	0.946041	0.946041	0.933131	1.10366	0.833392	0.810579	0.996297	0.828943	0.922632	0.978578
aPF10_0080_0	aPF10_0080_0	0.97811	0.97811	0.951993	1.04415	0.997131	0.892638	1.01899	0.861251	0.924589	1.06257
aPF14_0359_0	aPF14_0359_0	1.13185	1.13185	1.0592	1.02359	0.882724	1.02373	1.07674	1.05141	1.087	0.967446
aPF14_0568_0	aPF14_0568_0	0.974337	0.974337	0.985744	1.1134	0.851235	0.940672	1.07984	0.973869	1.11831	0.898632
aPFB0195c_1	aPFB0195c_1	1.04885	1.04885	0.982766	1.01818	0.993983	0.910651	0.981858	0.945253	0.984271	0.985662
aMAL7P1.19_3	aMAL7P1.19_3	0.982826	0.982826	0.971846	0.981395	0.840739	0.910651	1.01692	0.848328	0.905021	0.949231
aPF13_0161_1	aPF13_0161_1	0.990372	0.990372	1.05523	1.12639	0.884823	1.13981	0.888004	1.06895	1.15451	0.891548
aPF14_0281_1	aPF14_0281_1	0.979996	0.979996	0.973832	1.02359	0.970891	0.959686	1.0097	0.946176	0.934373	0.954291
aPF14_0402_1	aPF14_0402_1	0.991315	0.991315	1.09196	0.978149	1.02862	1.22387	1.01074	1.13172	1.15647	0.992746
aPFA0705c_0	aPFA0705c_0	1.05923	1.05923	1.02148	1.01818	1.0748	1.04375	0.993203	1.18157	1.08798	1.00287
aPFC1015c_2	aPFC1015c_2	0.920574	0.920574	0.977803	1.07769	1.05801	0.950679	1.00558	0.899098	0.948071	1.09698
aPF10_0125_1	aPF10_0125_1	1.12431	1.12431	1.14458	0.808271	1.3603	1.35297	0.950917	1.25265	1.09287	1.06966
aPFA0370w_0	aPFA0370w_0	0.915858	0.915858	0.982766	0.940278	0.970891	0.847606	0.852937	0.945253	0	1.06257
aPF14_0283_0	aPF14_0283_0	0.981883	0.981883	0.997656	1.10691	0.923659	0.861616	0.941634	0.921253	0.939265	0.95935
aMAL8P1.113_7	aMAL8P1.113_7	0.946041	0.946041	1.03339	1.25406	0.966693	0.905647	1.09634	0.92033	1.1144	0.971494
bDd2rif_85	bDd2rif_85	0.972451	0.972451	0.883497	0.939196	1.02757	0.935669	0.966387	0.903714	0.85023	1.04031
aPFC0416w_0	aPFC0416w_0	1.26296	1.26296	1.21803	0.908899	1.7476	1.35597	1.03652	1.41603	1.17897	1.32062
aPF07_0038_0	aPF07_0038_0	0.980939	0.980939	1.03042	1.0474	0.873277	0.944675	1.02621	0.93233	1.11342	0.951255
aPFE0500c_2	aPFE0500c_2	0.910199	0.910199	0.918241	1.10907	0.854384	0.865618	0.947823	0.819712	0.951006	0.924943
aPFL0120c_0	aPFL0120c_0	0.982826	0.982826	1.01354	1.26056	0.934155	0.869621	1.00455	0.898175	1.1144	0.957326
aPF08_0102_0	aPF08_0102_0	1.01018	1.01018	0.962912	0.997625	1.01393	0.947677	0.928227	1.01541	0.965682	0.943159
aMAL13P1.43_0	aMAL13P1.43_0	1.32144	1.32144	1.05722	0.666526	1.23119	1.43503	1.01589	1.32188	1.12516	1.00287
aMAL7P1.76_1	aMAL7P1.76_1	0.987542	0.987542	1.03637	1.15776	1.206	0.928663	0.975669	0.99787	1.03906	1.01197
aPF14_0767_0	aPF14_0767_0	1.07998	1.07998	0.967876	1.07661	0.940452	0.943674	1.06127	0.974793	0.909913	1.04233
aPF14_0736_1	aPF14_0736_1	1.12148	1.12148	1.06715	0.980313	0.966693	1.13081	1.12831	1.1031	0.992099	1.05549
aPF14_0341_0	aPF14_0341_0	1.22146	1.22146	1.17733	0.782303		1.57212	1.00661	1.51757	1.03123	1.94704
aPF11_0469_1	aPF11_0469_1	0.97811	0.97811	0.974825	1.11773	0.872228	0.833596	1.01486	0.858482	1.00775	1.00084
aPFC0520w_0	aPFC0520w_0	0.937552	0.937552	1.02049	1.06579	0.956197	0.958685	1.00352	0.930484	1.01265	0.992746
aMAL13P1.295_0	aMAL13P1.295_0	0.860208	0.860208	0.887468	1.2281	0.832342	0.886633	0.918944	0.760634	0.984271	0.89256
aPFD0487c_1	aPFD0487c_1	1.01112	1.01112	1.05821	1.06904	1.15037	1.08377	0.904505	1.16403	1.04298	1.06864
bDd2ste_4	bDd2ste_4	1.06771	1.06771	0.994678	0.956508	0.982437	0.926662	0.977732	0.960023	0.878604	1.03424
aMAL7P1.77_0	aMAL7P1.77_0	1.08564	1.08564	1.09891	1.01277	1.24274	1.17584	1.04477	1.20926	1.09581	1.16175
aMAL8P1.72_0	aMAL8P1.72_0	1.27711	1.27711	0.958941	0.551832	1.09789	1.42602	0	1.25172	0.753369	1.01197
aPF13_0217_0	aPF13_0217_0	0.996974	0.996974	1.12671	0.832076	0.878525	1.07077	0.971544	1.00156	0.876647	0.843985
aPF14_0181_0	aPF14_0181_0	0.920574	0.920574	0.93611	1.03117	1.04751	0.93767	1.03755	0.918484	1.00482	1.02715
aPFI0415c_0	aPFI0415c_0	1.02433	1.02433	0.927175	1.06579	0.913162	0.966691	0.927195	0.936022	0.948071	1.07168
aMAL13P1.440_0	aMAL13P1.440_0	1.09695	1.09695	1.06814	1.06579	0.970891	1.05876	1.0623	1.01541	1.06939	0.96441
aPFE0230w_0	aPFE0230w_0	0.942268	0.942268	0.96589	1.11016	0.97299	0.932666	1.11181	0.915714	1.01656	1.04942
aPF11_0049_2	aPF11_0049_2	0.849833	0.849833	0.875555	0.94136	0.844938	0.809578	0.910694	0.773557	0.861971	0.874345
aPF11_0509_0	aPF11_0509_0	1.03565	1.03565	1.13663	1.0052		1.02173	0.977732	1.1308	1.03221	0.960362
aPF11_0436_0	aPF11_0436_0	0.944154	0.944154	0.774301	1.0593	0.932055	0.908649	0.866345	0.860328	0.762174	1.04031
aPFB0805c_0	aPFB0805c_0	0.958302	0.958302	0.981773	1.07012	0.991883	0.889636	0.947823	0.936022	0.946114	1.0059
aPFE0980c_2	aPFE0980c_2	1.04602	1.04602	1.08501	1.05064	1.00343	1.08478	1.00764	1.10772	1.06939	0.98971
aPFD1020c_0	aPFD1020c_0	0.939438	0.939438	0.954971	0.926212	0.956197	0.820586	1.02414	0.896329	0.858058	0.999829
aPF14_0729_0	aPF14_0729_0	1.12902	1.12902	1.05325	1.00736	1.09999	1.09678	1.12212	1.1631	1.12907	1.10305
aMAL13P1.262_2	aMAL13P1.262_2	1.06111	1.06111	1.0602	0.993297	1.01183	1.03674	0.974638	1.15757	1.0782	0.983638
aPF11_0392_0	aPF11_0392_0	0.993201	0.993201	1.01255	1.01169	0.962494	0.956684	0.962262	0.996024	1.00188	1.05448
aPF14_0535_0	aPF14_0535_0	0.889448	0.889448	0.980781	0.904571	0.885873	0.927663	1.01796	0.955407	0.970574	0.985662
aPFF1595c_3	aPFF1595c_3	1.28748	1.28748	1.06615	1.0052	0.967742	1.15182	1.15822	1.4188	1.13788	1.07674
aPF10_0140_1	aPF10_0140_1	1.07149	1.07149	1.16344	1.0355	1.20076	1.14082	1.05508	1.16864	1.10853	1.01299
aPF10_0132_2	aPF10_0132_2	0.930949	0.930949	1.03141	0.964082	0.843888	0.849607	0.978763	0.848328	0.900129	0.934051
aMAL13P1.206_1	aMAL13P1.206_1	1.02338	1.02338	1.06715	0.920802	1.10104	1.01372	1.07262	1.10587	1.02732	1.12025
aPF10_0183_3	aPF10_0183_3	0.995088	0.995088	0.981773	1.13612	0.986635	0.908649	0.993203	0.931407	0.975466	1.01703
aMAL13P1.301_0	aMAL13P1.301_0	0.968678	0.968678	1.0195	1.09393	1.02232	0.828592	1.00455	0.949869	0.996012	1.06966
aPFD1070w_0	aPFD1070w_0	1.09318	1.09318	1.1277	1.18806	1.15877	1.03074	1.2036	1.02926	1.12027	1.09394
aPFI0660c_1	aPFI0660c_1	0.954529	0.954529	0.9917	1.02576	0.938353	0.890636	1.04683	0.877867	0.970574	0.98971
aPF11_0304_2	aPF11_0304_2	1.00924	1.00924	1.14855	1.00087	1.15142	1.10479	0.994234	1.08741	1.01265	1.04638
aPF10_0156_1	aPF10_0156_1	0.962075	0.962075	0.892431	1.13721	0.824995	0.88163	0.969481	0.811404	1.03515	0.928991
aMAL7P1.87_1	aMAL7P1.87_1	1.03753	1.03753	1.00957	0.903489	1.10629	1.16783	1.03652	1.35326	1.05472	1.12633
aPF11_0203_0	aPF11_0203_0	1.08186	1.08186	1.0463	0.967329	1.23539	1.25089	1.01899	1.24157	1.09483	1.07269
aPF13_0036_0	aPF13_0036_0	0.989428	0.989428	0.929161	1.1134	0.855434	0.859614	1.03136	0.870482	1.13592	0.949231
aPFF1470c_1	aPFF1470c_1	0.984712	0.984712	0.94008	1.03009	0.958296	0.990708	0.994234	0.931407	1.00188	0.986674
aMAL13P1.301_1	aMAL13P1.301_1	0.918687	0.918687	0.979788	0.960836	1.00868	1.09979	0.989077	1.01264	0.941222	1.04739
aPFB0235w_0	aPFB0235w_0	0.927176	0.927176	0.951993	1.18049	0.83864	0.856612	0.913788	0.834481	0.997969	0.944171
aPFI0410c_2	aPFI0410c_2	0.981883	0.981883	1.00461	0.8667	1.01707	1.27291	0.912756	1.25357	0.972531	0.91786
aPFI0010c_0	aPFI0010c_0	1.15638	1.15638	1.07409	0.858044	1.19131	1.30693	1.08087	1.22403	1.02732	1.16175
aPFI0695c_1	aPFI0695c_1	0.980939	0.980939	0.954971	0.896997	1.08635	1.01372	0.973607	1.01818	0.951984	1.08686
aPFD0872w_5	aPFD0872w_5	1.00075	1.00075	0.96589	1.06255	0.89217	0.916655	1.11903	0.895406	0.919697	0.949231
aPF14_0453_0	aPF14_0453_0	1.07526	1.07526	0.947029	0.833158	1.12623	1.16083	1.06334	1.1548	0.98525	1.07269
aMAL8P1.150_1	aMAL8P1.150_1	0.947927	0.947927	0.947029	0.95759	0.996082	0.862616	0.935446	0.925868	0.854144	0.980602
aPFI0240c_2	aPFI0240c_2	1.06017	1.06017	1.01056	1.04415	0.982437	0	1.05818	0.981254	0.992099	0.956314
aPF10_0262_2	aPF10_0262_2	1.0696	1.0696	0.977803	0.995461	0.826045	0.961687	0.879753	0.99787	1.0283	0.88244
aPFF0245w_0	aPFF0245w_0	1.18562	1.18562	1.03439	0.74876	1.33511	1.31194	0.998359	1.35511	1.04298	1.14049
aPF11_0197_1	aPF11_0197_1	0.932836	0.932836	0.968868	1.03441	1.00133	1.02573	1.01796	1.0431	1.03123	1.04334
aPF10_0219_0	aPF10_0219_0	1.00641	1.00641	1.0324	1.00628	1.30467	1.06376	1.00764	1.13633	1.06548	1.14049
aPF08_0074_0	aPF08_0074_0	1.03848	1.03848	1.00659	1.0171	1.09475	1.08878	1.10768	1.08649	0.987207	1.09495
aPFD0200c_0	aPFD0200c_0	1.0215	1.0215	1.00858	1.0355		1.02874	1.0819	0.996024	1.0782	0.95935
aPF14_0291_0	aPF14_0291_0	1.00075	1.00075	1.15549	1.02468	1.06011	0.987706	1.02105	1.08372	1.04004	0.997805
aPFC0560c_1	aPFC0560c_1	0.995088	0.995088	0.967876	0.905653	0.949899	0.913653	0.994234	0.873252	0.86882	0.980602
aPF13_0232_0	aPF13_0232_0	1.00641	1.00641	1.02247	1.00628	1.0748	1.05075	1.01692	1.03387	1.03319	1.04334
aPFB0665w_2	aPFB0665w_2	1.17147	1.17147	1.1823	0.921884	1.19866	1.33095	1.07674	1.32834	1.04787	1.10204
aPFE0635c_1	aPFE0635c_1	0.994144	0.994144	1.07012	1.09068	1.079	1.06976	1.01074	1.10033	0.724017	1.00489
aMAL13P1.175_0	aMAL13P1.175_0	1.04036	1.04036	1.04531	1.04199	1.19866	1.08277	1.25929	1.11972	1.13201	1.02007
aPFE1615c_0	aPFE1615c_0	1.07903	1.07903	1.03339	0.978149	1.13988	1.00972	0.996297	1.04218	0.972531	1.11621
aPFL1295w_0	aPFL1295w_0	0.993201	0.993201	1.09792	1.08202	0.841789	0.897641	1.07055	0.966485	1.22691	0.914824
aPFF0265c_0	aPFF0265c_0	1.01867	1.01867	0.96589	0.986805	0.938353	0.834596	0.978763	0.929561	0.941222	0.986674
aPF11_0442_1	aPF11_0442_1	1.06489	1.06489	1.08898	1.03766	1.16507	1.18885	1.13037	1.22126	1.09287	1.05448
aPFF1440w_0	aPFF1440w_0	0.9517	0.9517	0.952985	0.996543	0.823945	0.787563	0.974638	0.849251	0.915783	0.886488
bDd2ste_14	bDd2ste_14	1.10544	1.10544	1.06913	0.909981	1.09475	1.03974	1.06024	1.13357	1.0146	1.06156
aPF14_0263_0	aPF14_0263_0	1.01018	1.01018	1.01255	1.10258	1.02862	1.10179	0.971544	1.01726	1.1281	1.06156
aPFE0610c_0	aPFE0610c_0	0.869641	0.869641	0.867614	1.01169	0.894269	0.864618	1.00145	0.863098	0.89328	0.982626
aPF14_0529_0	aPF14_0529_0	0.996974	0.996974	0.947029	0.975985	1.02127	0.925661	1.00867	0.996947	0.972531	1.04334
aPF11_0089_1	aPF11_0089_1	1.03942	1.03942	1.03042	1.19023	0.896369	0.95168	1.12315	0.963715	1.20539	0.859165
aPFI1230c_0	aPFI1230c_0	0.957359	0.957359	1.00262	1.16642	0.89217	0.872623	0.89316	0.829866	0.986228	0.930003
aMAL7P1.31_0	aMAL7P1.31_0	0.970564	0.970564	0.970854	1.08743	0.89322	0.874625	1.01177	0.852943	0.928503	0.955303
aPF11_0390_1	aPF11_0390_1	1.01301	1.01301	0.937102	0.91972	0.999231	0.961687	1.00145	0.9591	0.869798	0.976554
aPF13_0273_3	aPF13_0273_3	0.999804	0.999804	0.930153	0.929458	0.963544	1.03974	1.02621	0.941561	0.894258	0.96441
aPFL2435w_0	aPFL2435w_0	0.973394	0.973394				0	1.03343	0.904637	0.990142	1.04537
aPFA0675w_1	aPFA0675w_1	1.03848	1.03848	1.01255	1.07986	0.980338	0.946676	0.947823	1.01541	0.940243	0.958338
aPFC0490w_0	aPFC0490w_0	0.921517	0.921517	0.946036	1.09717	0.791407	0.720515	0.91585	0.767095	0.870777	0.961374
aPF14_0147_0	aPF14_0147_0	1.03282	1.03282	1.01751	0.993297	0.881674	1.02673	0.995265	0.9831	1.03123	0.824758
aPFC0875w_1	aPFC0875w_1	1.11959	1.11959	1.0999	0.849388	1.12308	1.20186	0.999391	1.14649	0.904043	1.06055
aPFL1435c_1	aPFL1435c_1	1.11488	1.11488	1.11876	0.991133	1.11784	1.19786	1.00248	1.19449	1.01949	1.11317
aPF11_0067_0	aPF11_0067_0	1.08941	1.08941	0.970854	1.04091	1.0706	1.01473	1.0623	0.980331	1.05863	0.906728
aPFE0365c_0	aPFE0365c_0	1.02527	1.02527	1.1684	1.26164	1.00448	1.03674	0.998359	1.22218	1.26605	0.903692
aPFL1735c_1	aPFL1735c_1	1.01961	1.01961	1.04431	1.1253	1.00448	0.975697	0.998359	0.984024	1.02341	0.995781
aPFD0255w_0	aPFD0255w_0	1.04319	1.04319	1.06516	0.849388	1.20181	1.32495	1.05199	1.24988	1.05276	1.11013
aPFC0100c_0	aPFC0100c_0	1.02055	1.02055	1.06814	1.1859	1.0706	0.985704	1.04993	1.14557	1.13103	1.02108
aPF14_0307_0	aPF14_0307_0	0.87247	0.87247	0.848753	1.22485	0.786159	0.710508	0.936478	0.686786	0.91774	0.891548
aMAL8P1.106_0	aMAL8P1.106_0	0.994144	0.994144	1.03042	0.800697	1.27108	1.20186	0.994234	1.29788	1.0009	1.04942
aPFI1130c_0	aPFI1130c_0	0.966791	0.966791	1.02644	0.986805	1.00028	1.06976	0.975669	0.975716	0.950027	0.975542
aPF14_0047_1	aPF14_0047_1	0.905483	0.905483	0.908314	0.95218	1.02862	0.952681	0.941634	0.972946	0.937308	1.01299
aPF14_0497_1	aPF14_0497_1	0.919631	0.919631	1.02942	1.18049	0.984536	0.946676	0.993203	0.950792	1.15256	1.00287
aPFA0180w_1	aPFA0180w_1	0.962075	0.962075	0.911292	0.887259	0.900567	0.976698	0.929258	0.934176	0.930459	0.971494
aPF10_0030_1	aPF10_0030_1	1.04036	1.04036	1.06417	0.933786	0.801904	0.980701	1.08087	0.903714	0.843382	0
aPFF1195c_0	aPFF1195c_0	1.01112	1.01112	1.05424	1.0593	1.04436	1.00072	1.04477	1.01172	0.975466	1.04942
aPFF1065c_1	aPFF1065c_1	1.00075	1.00075	0.984751	0.984641	0.820797	0.840601	0.850874	0.832635	0.905021	0.921907
aPF14_0404_3	aPF14_0404_3	1.03848	1.03848	0.948022	1.13071	0.734728	1.09278	1.01383	0.975716	1.0645	0.848033
aPFE1320w_2	aPFE1320w_2	1.01772	1.01772	0.913278	0.964082	0.900567	0.934668	0.917913	0.912022	0.931438	0.966434
aMAL13P1.52_1	aMAL13P1.52_1	1.0913	1.0913	1.00063	0.983559	1.04331	0.930665	1.02827	1.03479	0.955898	1.05852
aPFB0545c_0	aPFB0545c_0	0.988485	0.988485	1.0602	1.16426	1.11049	0.962688	0.963293	0.993255	1.05569	0.985662
aPFD0285c_3	aPFD0285c_3	1.20071	1.20071	1.01354	0.733612	1.18186	1.17784	1.05612	1.26741	0.950027	1.06662
aPF14_0099_0	aPF14_0099_0	1.05545	1.05545	1.06317	1.07769	0.954097	0.964689	1.07365	0.963715	1.04102	1.1243
aPFD0225w_2	aPFD0225w_2	0.935665	0.935665	0.975817	1.08094	0.868029	0.958685	1.06746	0.883406	0.979379	0.997805
aMAL8P1.60_0	aMAL8P1.60_0	0.857379	0.857379	0.921219	1.01927	0.844938	0.761544	0.979795	0.757864	0.866863	0.925955
aPFF1440w_7	aPFF1440w_7	1.10922	1.10922	1.11777	1.0355	1.14933	1.12681	1.03858	1.04772	1.01852	1.04031
aPF14_0258_0	aPF14_0258_0	0.800786	0.800786	0.910299	1.17291	0.847037	0.858613	0.946791	0.733864	0.907956	0.96441
aPFL1760w_1	aPFL1760w_1	0.984712	0.984712	0.996664	1.20105	0.889021	0.860615	0.946791	0.888944	1.04395	0.966434
aPFL0465c_1	aPFL0465c_1	1.063	1.063	0.974825	0.990051	1.06851	1.03874	1.08396	1.02833	1.01656	1.11621
aPFL1470c_0	aPFL1470c_0	0.897937	0.897937	0.935117	1.08311	0.943601	0.904646	0.971544	0.891714	0.943179	1.00084
aPFF0280w_0	aPFF0280w_0	1.01112	1.01112	1.02843	1.03441	0.981387	0.925661	0.999391	0.9831	1.07722	0.949231
aPFD0250c_1	aPFD0250c_1	1.00829	1.00829	1.04729	1.15127	1.10629	0.998714	1.17679	1.14464	1.20148	0.961374
aPFI0630w_0	aPFI0630w_0	1.13468	1.13468	1.03042	0.805025	1.28787	1.4	1.10356	1.31265	1.10657	1.16883
aPF14_0649_2	aPF14_0649_2	1.01867	1.01867	1.08501	0.971657	1.25639	1.19886	0.999391	1.17418	1.13788	0.985662
aPFL2255w_0	aPFL2255w_0	1.10261	1.10261	1.16443	0.958672	1.07375	1.13081	1.08293	1.07079	1.02928	1.15871
aMAL8P1.218_0	aMAL8P1.218_0	1.23372	1.23372	1.20612	0.838568	1.35715	0	0	1.20372	0	0.942147
bDd2ste_25	bDd2ste_25	1.05451	1.05451	0.934124	0.953262	0.926807	1.04475	1.04065	0.9591	0.98525	1.02816
aPF13_0121_1	aPF13_0121_1	0.953586	0.953586	0.952985	1.10691	0.878525	0.875626	0.979795	0.833558	0.950027	0.987686
aPFD0230c_0	aPFD0230c_0	1.08281	1.08281	1.06516	1.00412	1.23015	1.05776	1.12315	1.18249	1.10168	1.04942
aMAL13P1.157_1	aMAL13P1.157_1	0.945097	0.945097	0.918241	1.06471	0.955147	0.877627	0.936478	0.910176	0.945135	0.911788
aMAL7P1.43_0	aMAL7P1.43_0	0.988485	0.988485	0.934124	0.992215	0.898468	0.927663	1.04168	0.918484	0.88741	0.925955
aPF07_0130_0	aPF07_0130_0	0.966791	0.966791	0.937102	1.05714	0.890071	0	0.998359	0.948946	0.927524	0.938099
aPF14_0140_1	aPF14_0140_1	0.92812	0.92812	0.901365	1.05173	0.868029	0.924661	1.04271	0.902791	0.928503	0.939111
bDd2var_130	bDd2var_130	1.16581	1.16581	1.17436	0.851552	1.21335	1.26991	1.13037	1.30249	1.10168	1.09799
atRNA_RNAGly2_0	atRNA_RNAGly2_0	0.863981	0.863981	0.775293	0.795287	0.714786	0.877627	0.987014	0.847405	1.06059	0.980602
aPF11_0440_0	aPF11_0440_0	0.996974	0.996974	0.9917	0.955426	1.02652	0.963689	1.06334	1.01726	1.01852	1.00084
aMAL13P1.151_3	aMAL13P1.151_3	1.02999	1.02999	1.08104	0.83424	1.3519	1.20086	1.08087	1.24803	0.961768	1.08079
aPF11_0240_6	aPF11_0240_6	0.97528	0.97528	1.05821	1.04848	1.11364	0.975697	1.118	0.943407	0.935351	1.09495
aPF11_0044_0	aPF11_0044_0	0.942268	0.942268	0.906329	1.07661	0.983486	0.945676	0.94576	0.94433	1.01852	0.883452
aPF11_0309_0	aPF11_0309_0	0.950757	0.950757	0.913278	1.11557	0.750473	0.880629	0.955042	0.855713	0.997969	0.932027
aPF13_0242_0	aPF13_0242_0	1.06583	1.06583	1.01453	1.10799	1.08425	1.04174	1.01796	1.08003	1.1506	1.03626
aPFL1050w_1	aPFL1050w_1	0.97811	0.97811	0.990708	0.92513	1.09999	1.06776	0.926164	0.957254	0.992099	0.973518
bDd2var_118	bDd2var_118	1.02433	1.02433	0.96589	1.06687	1.19971	1.03174	1.118	1.14464	1.13103	1.099
aPFD1115c_0	aPFD1115c_0	0.971507	0.971507	0.929161	1.08094	0.935204	1.03074	0.94576	0.896329	1.04298	1.03221
aPFB0680w_1	aPFB0680w_1	1.01584	1.01584	1.06317	0.937032	1.12938	1.05776	0.879753	1.04126	0.951006	1.01096
aPF11_0450_0	aPF11_0450_0	0.940381	0.940381	0.885482	0.904571	0.916311	0.977699	0.974638	0.894483	0.902086	0.955303
aPFD0985w_0	aPFD0985w_0	1.02244	1.02244	1.03637	0.875357	1.15352	1.21787	0.994234	1.24434	1.14277	1.02918
aPF11_0070_0	aPF11_0070_0	1.07337	1.07337	1.11579	0.934868	1.0895	1.02974	1.02517	1.04679	1.0508	1.014
aPFA0330w_0	aPFA0330w_0	1.02244	1.02244	1.14656	1.03982	1.10314	1.09879	1.00661	1.05879	1.11733	1.02007
aPF07_0087_0	aPF07_0087_0	1.01207	1.01207	0.995671	1.12639	0.877476	0.850608	0.994234	0.874175	0.986228	0.921907
aPFF1060w_0	aPFF1060w_0	1.11488	1.11488	1.06615	1.01061	1.13253	1.07277	1.07881	1.05972	1.12125	0.973518
aPFL0305c_0	aPFL0305c_0	1.04319	1.04319	0.997656	1.01818	0.913162	0.964689	1.00042	0.948023	0.913827	0.999829
aPF11_0290_0	aPF11_0290_0	1.09224	1.09224	0.992693	0.933786	1.13148	1.13881	0	1.16495	1.06939	1.02918
aPF14_0458_0	aPF14_0458_0	0.986599	0.986599	0.974825	1.00304	1.04856	1.02373	0.971544	1.07172	0.971552	1.09597
aMAL7P1.215_0	aMAL7P1.215_0	1.3752	1.3752	1.40764			#N/A	#N/A	#N/A	#N/A	#N/A
aPF13_0072_0	aPF13_0072_0	0.867754	0.867754	0.967876	1.07012	0.969842	0.878628	0.941634	0.910176	0.993077	0.987686
aPF11_0313_0	aPF11_0313_0	0.993201	0.993201	0.999642	1.07012	0.939403	0.929664	0.979795	0.952638	0.962747	0.958338
aPF13_0121_0	aPF13_0121_0	1.01207	1.01207	0.98773	0.964082	0.981387	1.06376	0.926164	1.11233	1.07624	1.04132
aPFL2510w_1	aPFL2510w_1	0.92529	0.92529	0.992693	1.04091	0.913162	0.920658	0.958136	0.963715	0.981336	0.947207
aMAL7P1.144_1	aMAL7P1.144_1	1.0347	1.0347	1.09693	1.1253	1.11994	0.982702	0.987014	1.01449	0.974487	1.06358
aPFC0340w_0	aPFC0340w_0	1.05262	1.05262	0.992693	1.09393	0.942552	0.912652	0.959168	0.928638	0.915783	0.996793
aPFD0170c_0	aPFD0170c_0	1.10544	1.10544	1.0185	0.862372	1.26583	1.38199	1.02105	1.29788	1.06646	1.14859
aMAL8P1.149_1	aMAL8P1.149_1	1.10356	1.10356	1.19818	0.800697	1.10734	1.17284	1.04271	1.28495	0.995034	1.0059
aPFE0485w_1	aPFE0485w_1	0.931892	0.931892	0.929161	1.08311	0.957246	0.920658	0.942666	0.864021	0.931438	1.02614
aPFL0115w_1	aPFL0115w_1	0.982826	0.982826	1.11976	1.07661	1.05486	1.07977	1.05921	1.1188	1.13495	1.04436
aPF14_0414_2	aPF14_0414_2	0.870584	0.870584	0.909307	0.996543	0.879575	0.924661	0.999391	0.915714	0.928503	0.97959
aPF13_0041_1	aPF13_0041_1	1.10356	1.10356	1.04828	0.886177	1.17766	1.22488	0.997328	1.06618	0.989163	1.10811
aPF13_0258_2	aPF13_0258_2	0.99886	0.99886	0.990708	1.00845	0.932055	0.938671	0.964324	0.907406	0.959811	1.06561
aPFL1190c_0	aPFL1190c_0	1.01772	1.01772	0.980781	0.790959	1.17032	1.22688	0.93854	1.22034	0.962747	0.938099
aPF10_0374_5	aPF10_0374_5	1.10073	1.10073	1.15351	0.987887	1.06116	0.992709	1.01074	1.00341	0.902086	1.05549
aPFF0740c_1	aPFF0740c_1	1.03659	1.03659	1.02049	0.977067	1.07795	0.922659	0.958136	1.04956	0.922632	1.01197
aPFL1055c_1	aPFL1055c_1	0.960189	0.960189	1.06814	0.956508	1.0727	1.17684	1.00558	1.17234	0.959811	0.991734
aPFD0985w_4	aPFD0985w_4	1.04225	1.04225	0.990708	0.958672	0.985586	1.09979	1.0458	1.07264	0.973509	0.978578
aPFI0990c_0	aPFI0990c_0	0.930006	0.930006	0.998649	1.08635	0.962494	0.952681	1.08603	0.955407	0.993077	0.967446
aMAL13P1.57_0	aMAL13P1.57_0			1.03736	1.10042	1.08425	0.958685	0.925133	1.09756	1.06744	0.993757
bDd2var_134	bDd2var_134	1.0413	1.0413	1.03439	1.0593	1.04856	1.02473	1.04271	1.0911	0.981336	1.00489
aPF08_0060_2	aPF08_0060_2	0.969621	0.969621	0.919234	1.01169	0.917361	0.967691	0.921007	0.936945	0.940243	0.956314
aPFE1120w_13	aPFE1120w_13	0.85172	0.85172		1.02576	0.866979	0.840601	1.04477	0.886175	0.916762	0.963398
aPFA0340w_1	aPFA0340w_1	0.967735	0.967735	0.918241	0.983559	0.875376	0.959686	0.974638	0.918484	0.965682	0.957326
aPF10_0372_0	aPF10_0372_0	1.04225	1.04225	1.08104	0.981395	0.979288	0.987706	0.946791	0.991408	0.938287	1.06662
aPFA0725w_2	aPFA0725w_2	1.02999	1.02999	0.992693	1.13829	0.897418	0.964689	0.989077	1.00249	1.09483	0.965422
aPFF0385c_1	aPFF0385c_1	0.961132	0.961132	0.93611	1.07661	0.901617	0.835597	0.914819	0.826174	0.899151	0.95935
aPFF0350w_0	aPFF0350w_0	1.01395	1.01395	1.1009	1.01169	1.15982	1.03674	0.972575	1.04126	1.0146	1.12025
aMAL13P1.29_0	aMAL13P1.29_0	0.94887	0.94887	0.947029	1.00628	0.922609	1.03974	0.998359	1.01264	1.01754	1.00894
aMAL8P1.113_8	aMAL8P1.113_8	1.05357	1.05357	1.08204	1.00628	1.01602	1.05075	1.09221	0.987716	1.087	1.03019
aPFI0410c_3	aPFI0410c_3	0.974337	0.974337	0.957949	1.02035	0.911063	0.96569	1.04271	0.903714	0.973509	0.995781
aPF13_0033_1	aPF13_0033_1	0.911142	0.911142	0.94008	1.19239	0.959345	0.844603	0.999391	0.886175	1.06646	0.97453
aPF10_0272_0	aPF10_0272_0	0.974337	0.974337	0.945044	1.04199	1.00133	0.880629	0.988046	0.895406	0.93633	1.04132
aPFF1510w_1	aPFF1510w_1	1.08186	1.08186	1.05821	0.836404	1.29942	1.29192	0.96845	1.36896	1.01656	1.0231
aPFL1645w_1	aPFL1645w_1	0.89605	0.89605	1.087	1.0896	1.02022	1.06376	1.04477	1.11603	1.11636	1.00894
bDd2rif_36	bDd2rif_36	1.01301	1.01301	0.929161	1.03982	0.939403	0.949679	0.935446	0.90556	0.922632	0.954291
aPF14_0647_0	aPF14_0647_0	1.05074	1.05074	1.05722	1.09825	0.958296	0.975697	1.05818	0.918484	1.05472	1.00793
aPF11_0149_0	aPF11_0149_0	1.00358	1.00358	1.02247	1.11124	0.951998	0.898642	0.962262	0.869559	1.01069	1.00793
aMAL7P1.57_0	aMAL7P1.57_0	1.02055	1.02055	1.0056	0.892669	0.998181	0.957684	1.02724	0.952638	0.866863	0.980602
aPFE0435c_0	aPFE0435c_0	1.03187	1.03187	0.949014	1.03009	0.963544	0.974696	1.02208	0.977562	1.01754	1.01602
aPF11_0482_0	aPF11_0482_0	1.08092	1.08092	1.04828	0.968411	1.14723	1.09078	0.999391	1.1548	1.07135	1.02007
aPF07_0102_0	aPF07_0102_0	1.0215	1.0215	0.999642	0.874275	0.966693	0.985704	1.0128	0.974793	0.972531	0.869285
aPFI1135c_0	aPFI1135c_0	0.969621	0.969621	1.00063	1.02251	1.10314	0.99371	0.99114	1.08464	0.96666	1.21234
aPFI0175w_0	aPFI0175w_0	1.20354	1.20354	1.02446	0.75958	1.06955	1.31094	1.05199	1.18341	1.00188	0.90774
aPFL1550w_1	aPFL1550w_1	0.979053	0.979053	1.06119	0.858044	1.17137	0.994711	0.998359	0.990485	0.871755	1.099
aPFB0315w_2	aPFB0315w_2	1.06489	1.06489	1.11777	0.901325	1.16192	1.12981	1.04477	1.13818	1.04982	1.03525
aPFI0585c_2	aPFI0585c_2	0.954529	0.954529	0.992693	1.10583	0.912113	0.916655	1.04271	0.912022	1.03711	0.981614
aPF14_0334_3	aPF14_0334_3	1.05923	1.05923	1.10884	1.1134	1.02232	0.981701	0.98392	1.01172	1.07037	1.02614
aPF14_0216_0	aPF14_0216_0	1.0413	1.0413	1.00361	1.04199	0.97404	1.03174	0.948854	0.936945	0	1.0484
aPF07_0086_3	aPF07_0086_3	1.15543	1.15543	1.09395	0.940278	1.02967	1.00972	0.861188	0.975716	0.98525	1.06662
aPF11_0242_2	aPF11_0242_2	1.02904	1.02904	1.0999	1.15776	1.06536	1.04775	1.06437	1.08741	1.1232	1.06966
aPF14_0419_3	aPF14_0419_3	1.05923	1.05923	1.07409	0.918638	1.02127	1.17584	1.00867	1.09756	1.07722	0.997805
aMAL13P1.348_1	aMAL13P1.348_1	0.889448	0.889448	0.870592	0.917555	0.891121	0.890636	0.843655	0.918484	0.845338	0.982626
aPF10_0232_1	aPF10_0232_1	1.15921	1.15921	1.10983	1.02251	1.09475	1.15182	1.04477	1.09756	1.03906	1.12633
aPFL1075w_1	aPFL1075w_1	0.969621	0.969621	1.05027	1.04415	0.948849	0.940672	0.910694	0.986793	1.06059	0.934051
aPFL1290w_1	aPFL1290w_1	0.930949	0.930949	0.982766	0.953262	1.05696	0.957684	0.930289	1.00064	0.910891	0.998817
aPFF0470w_0	aPFF0470w_0	1.04696	1.04696	1.14954	1.15452	1.03177	0.919657	1.03858	1.02002	1.03808	1.01299
aPF08_0111_1	aPF08_0111_1	0.995088	0.995088	1.11876	0.998707	1.24904	1.04174	0.98392	1.1068	0.98525	1.02412
aPF14_0495_3	aPF14_0495_3	1.03376	1.03376	1.06814	1.01169	0.9457	1.07077	1.06024	1.05049	1.0283	0.947207
aPF10_0250_1	aPF10_0250_1	0.966791	0.966791	0.96589	0.951098	0.821846	0.870622	0.952979	0.907406	0.858058	0.824758
aPFC1025w_0	aPFC1025w_0	1.00075	1.00075	1.087	0.824502	1.28158	1.44203	0.90038	1.43173	1.13397	1.05448
aPF11_0528_0	aPF11_0528_0	1.07432	1.07432	1.04729	1.08419	1.00238	0.931666	1.09118	0.940638	1.04689	1.00894
aPFD0625c_3	aPFD0625c_3	1.03282	1.03282	0.890446	1.07337	0.8124	0.828592	1.11697	0.923099	0.929481	0.934051
aPF14_0045_0	aPF14_0045_0	0.973394	0.973394	0.951	0.992215	1.0916	1.06476	0.935446	1.01726	0.975466	0.956314
aPFF0195c_2	aPFF0195c_2	0.932836	0.932836	1.0056	1.16426	0.989784	0.8396	0.995265	0.901868	0.976444	1.03322
aPFD0380c_2	aPFD0380c_2	0.996031	0.996031	0.946036	0.786631	1.10524	1.20586	0.875627	1.19264	0.978401	1.0818
aPF14_0740_1	aPF14_0740_1	1.05545	1.05545	1.13167	1.13071	1.10209	0.967691	1.02414	0.9711	1.04885	0
aMAL7P1.152_1	aMAL7P1.152_1	0.992258	0.992258	0.928168	1.05173	1.08635	1.01573	1.03446	1.00895	0.993077	1.08888
aPF13_0157_1	aPF13_0157_1	0.921517	0.921517	0.960927	0.91972	1.10944	1.03874	0.910694	1.00433	0.931438	1.06561
aPFE0260w_1	aPFE0260w_1	0.933779	0.933779	1.00758	1.07769	0.927857	0.848606	0.94576	0.867713	0.954919	0.96947
aPFA0185w_0	aPFA0185w_0	1.02999	1.02999	1.15649	0.982477	1.11469	1.19185	1.07984	1.20926	1.1868	1.0231
aPF10_0261_0	aPF10_0261_0	0.893221	0.893221	1.04332	0.987887	1.05696	0.949679	1.02414	1.06895	0.990142	0.977566
aPFI0730w_1	aPFI0730w_1	1.0413	1.0413	1.06218	1.1015	1.08635	1.04375	1.02827	1.04033	1.0283	1.01906
aPFF0515c_0	aPFF0515c_0	0.904539	0.904539	0.971846	0.954344	0.970891	0.936669	0.962262	0.93233	0.901107	0.934051
aPFL1250c_1	aPFL1250c_1	0.980939	0.980939	0.951993	1.07445	0.884823	0.977699	1.07159	0.908329	0.992099	0.940123
aMAL7P1.350_0	aMAL7P1.350_0	1.00546	1.00546	0.980781	0.948934	0.957246	0.897641	1.06127	0.928638	0.863928	1.11216
aPFI0250c_2	aPFI0250c_2	1.0979	1.0979	1.06417	0.884013	1.2102	1.1248	1.03755	1.0948	0.856101	1.05751
aPFE0930w_1	aPFE0930w_1	0.89888	0.89888	0.906329	0.964082	1.03072	0.963689	0.918944	0.948946	0.806202	1.04436
aPFE0985w_1	aPFE0985w_1	0.984712	0.984712	0.984751	0.922966	0.976139	0.969693	0.955042	1.00618	0.913827	1.00185
aPF13_0278_1	aPF13_0278_1	0.936608	0.936608	0.916256	1.03009	1.08845	0.971694	0.863251	0.973869	1.00188	1.02007
aPF14_0018_1	aPF14_0018_1	1.02338	1.02338	1.01453	1.02684	1.00238	0.942674	0.971544	0.966485	0.965682	1.01804
aPFE0320w_1	aPFE0320w_1	1.06017	1.06017	1.02446	1.07878	0.987685	0.980701	0.993203	0.986793	0.951984	0
aMAL13P1.86_0	aMAL13P1.86_0	1.02621	1.02621	1.08104	1.07445	1.19866	1.08478	0.967419	1.08926	1.15745	1.01299
aPFB0390w_0	aPFB0390w_0	0.895107	0.895107	0.900373	1.09825	0.793507	0.824589	0.963293	0.821558	0.951006	0.903692
aPFI0755c_1	aPFI0755c_1	1.02621	1.02621	0.977803	1.01061	1.14408	1.06976	0.912756	1.06895	1.03221	1.03626
aPF14_0463_2	aPF14_0463_2	0.972451	0.972451	0.984751	1.08419	0.821846	0.856612	1.03136	0.926791	1.0058	0.891548
aMAL7P1.162_6	aMAL7P1.162_6	0.995088	0.995088	0.97681	1.0896	0.898468	0.849607	0.963293	0.800327	0.871755	0.973518
aPFF0565c_1	aPFF0565c_1	0.937552	0.937552	1.03538	1.04956	1.14093	1.11079	1.0654	0.999716	1.06157	0.97959
aPF10_0149_1	aPF10_0149_1	0.958302	0.958302	1.0592	1.07553	0.858583	0.92366	0.970513	0.903714	1.00384	0.908752
aPF10_0045_3	aPF10_0045_3	1.12053	1.12053	1.14358	0.856962	1.0706	1.26891	1.00042	1.18711	0.965682	1.03221
aPF08_0117_1	aPF08_0117_1	1.12148	1.12148	1.13763	0.806107		1.46405	1.00558	1.52404	1.12907	1.15365
aPF10_0281_0	aPF10_0281_0	1.08658	1.08658	1.08501	1.00412	0.991883	0.989707	1.00455	0.984947	0.93633	0.927979
arps2_0	arps2_0	0.907369	0.907369	0.664112	0.621081	0.870128	1.09578	0.933383	0	1.08994	1.10103
aPFF1315w_1	aPFF1315w_1	1.01961	1.01961	0.983759	0.950016	1.01078	1.09378	0.96845	1.04679	0.967639	0.968458
aPFL0920c_0	aPFL0920c_0	0.881902	0.881902	0.915263	0.907817	1.03282	0.989707	0.958136	0.963715	0.951984	1.07067
aPF11_0331_1	aPF11_0331_1	1.0413	1.0413	1.11579	0.948934	1.06536	1.13681	1.02517	1.06895	0.968617	1.03525
aPF11_0507_7	aPF11_0507_7	1.06677	1.06677	1.0731	0.865618	1.00763	1.06176	0.99114	1.15203	0.970574	0.97453
aPF14_0675_0	aPF14_0675_0	1.07903	1.07903	1.03836	0.928376	1.05381	1.07177	0.987014	1.08833	1.06059	0.987686
aPF08_0035_1	aPF08_0035_1	1.00075	1.00075	0.951	0.922966	1.02862	1.03474	0.941634	0.935099	0.894258	0.985662
aMAL7P1.310_0	aMAL7P1.310_0	0.971507	0.971507	0.956956	0.932704	0.910014	0.902645	0.967419	1.02279	0.938287	0.963398
aPFI1445w_1	aPFI1445w_1	0.955473	0.955473	1.09494	1.02792	1.13778	1.01973	1.03755	1.07264	0.972531	1.05852
aPF13_0198_1	aPF13_0198_1	0.913971	0.913971	0.973832	0.94677	0.868029	0.92366	0.898317	0.926791	0.943179	0.880417
aPF14_0020_1	aPF14_0020_1	0.989428	0.989428	0.921219	1.05064	0.951998	0.915654	0.981858	0.925868	1.05961	1.05448
aPFE0715w_0	aPFE0715w_0	1.01301	1.01301	1.0056	1.09717	0.980338	0.898642	1.01383	0.953561	0.950027	0.986674
aPF13_0309_0	aPF13_0309_0	0.89605	0.89605	0.764374	1.11016	0.829194	0.812581	1.04786	0.78648	0.980358	1.0231
aMAL7P1.37_1	aMAL7P1.37_1	0.94887	0.94887	0.972839	1.01061	1.04226	0.93767	1.03343	0.954484	0.962747	1.02209
aPFL1010c_3	aPFL1010c_3	0.966791	0.966791	0.96589	0.998707	1.04122	1.04875	0.993203	1.07079	1.01949	1.014
aPFL0360c_0	aPFL0360c_0	1.00735	1.00735	0.897394	1.07337	1.04017	1.02573	1.11387	0.871405	1.02634	0.98465
aPF14_0062_0	aPF14_0062_0	0.973394	0.973394	0.942066	0.95218	1.00133	0.992709	1.03136	1.01079	1.03711	1.02412
aPFE0735w_0	aPFE0735w_0	1.20071	1.20071	1.08402	0.704397	1.30467	1.28792	1.03136	1.39665	1.05178	1.10305
aPFE0705c_2	aPFE0705c_2	0.987542	0.987542	0.973832	1.04307	0.862781	0.884632	1.04271	0.930484	0.96079	0.9128
aPFI0465c_0	aPFI0465c_0	0.957359	0.957359	1.01354	1.00953	0.856483	0.882631	0.864282	0.904637	1.01167	0.982626
aPF11_0123_0	aPF11_0123_0	1.00829	1.00829	0.948022	1.09176	0.874327	0.819586	1.08499	0.912945	0.941222	1.04132
aPF14_0244_1	aPF14_0244_1	1.07054	1.07054	0.992693	1.00736	1.07795	1.05876	0.948854	1.05418	0.934373	1.0565
aPF14_0222_0	aPF14_0222_0	0.995088	0.995088	0.994678	0.987887	1.09789	1.13681	0.93854	1.01079	0.994055	1.06156
aPF10_0097_0	aPF10_0097_0	1.08186	1.08186	1.00659	0.83965	1.25639	1.15883	1.07881	1.22495	1.01265	1.11823
aMAL13P1.262_0	aMAL13P1.262_0	1.03282	1.03282	0.986737	0.892669	1.06431	1.21587	0.974638	1.20464	1.09874	1.01703
aPFD0420c_0	aPFD0420c_0	1.02621	1.02621	1.06218	0.999789	1.10629	1.06276	1.05508	1.09572	1.03123	1.00388
aPF10_0187_0	aPF10_0187_0	1.00169	1.00169	0.944051	1.17399	0.943601	0.86762	1.14069	0.87879	0.969595	1.03525
aPF14_0048_0	aPF14_0048_0	0.973394	0.973394	1.00063	0.945688	0.97509	1.06076	1.02311	0.996024	1.0146	0.98971
aPFE1390w_1	aPFE1390w_1	1.00641	1.00641	0.971846	0.929458	1.09055	1.10479	1.02517	0.975716	0.929481	1.01804
aMAL13P1.176_2	aMAL13P1.176_2	0.985655	0.985655	0.994678	0.955426	1.02232	1.13481	1.01177	1.12526	1.04787	0.96947
aPF14_0587_1	aPF14_0587_1	1.08564	1.08564	1.14755	0.979231	0.999231	1.00372	1.03136	1.01818	1.00188	0.972506
aPF14_0700_0	aPF14_0700_0	1.06017	1.06017	1.02446	0.971657	0.963544	1.04275	0.985983	0.994178	0.971552	1.01906
aPF10_0232_2	aPF10_0232_2	1.0149	1.0149	1.09494	1.04848	1.12518	1.1128	1.05818	1.14926	1.04787	1.01096
aPFE1325w_3	aPFE1325w_3	1.02999	1.02999	1.04233	1.02576	1.13778	0.961687	1.12315	1.05603	0.992099	1.07876
aPF08_0030_0	aPF08_0030_0	0.900766	0.900766	0.947029	1.09501	1.00553	0.964689	0.913788	0.936022	0.96079	1.00489
aPFE1535w_1	aPFE1535w_1	1.00075	1.00075	0.923204	1.0052	0.887972	0.952681	1.09634	0.978485	0.967639	0.869285
aPF11_0393_0	aPF11_0393_0	0.986599	0.986599	1.00262	0.929458	0.976139	0.912652	1.02724	1.02279	1.0645	0.973518
aPFI0655c_0	aPFI0655c_0	0.971507	0.971507	0.891438	1.02143	1.04017	0.941673	0.987014	1.0311	0.923611	1.05954
aPFE1200w_0	aPFE1200w_0	0.983769	0.983769	1.08204	1.029	0.936254	1.02073	1.03652	1.04033	0	0.971494
aPFB0195c_0	aPFB0195c_0	0.971507	0.971507	0.996664	1.06904	1.0853	0.998714	1.01074	1.04033	1.01069	1.0059
aMAL7P1.52_1	aMAL7P1.52_1	1.08941	1.08941	1.03637	1.02359	0.978238	0.976698	1.08293	0.951715	0.973509	1.07472
aPFF1440w_2	aPFF1440w_2	1.00829	1.00829	0.982766	0.94677	0.987685	0.946676	1.15513	0.939715	0.892302	1.01197
aPFI0390c_0	aPFI0390c_0	1.03093	1.03093	0.947029	1.03009	0.848087	0.938671	0.992171	0.869559	0.979379	0.919883
aPF08_0131_0	aPF08_0131_0	1.00924	1.00924	0.958941	0.990051	0.983486	0.892638	0.831279	0.898175	0.848274	1.00287
aPF10_0128_1	aPF10_0128_1	0.97528	0.97528	1.0463	0.986805	1.14513	1.13381	1.00558	1.03941	1.06548	1.08686
bDd2var_60	bDd2var_60	1.1394	1.1394	1.02942	0.853716	1.10734	1.14782	1.15203	1.20095	0.964703	1.11115
aPF10_0214_0	aPF10_0214_0	0.94887	0.94887	0.876548	1.01927	1.03177	0.998714	0.982889	0.949869	0.951006	0.950243
aPF13_0136_1	aPF13_0136_1	1.03282	1.03282	1.04729	0.434973	1.22805	1.12881	1.01383	1.08833	0.896215	1.09597
aPF11_0327_1	aPF11_0327_1	1.05923	1.05923	1.05722	0.891587	1.34455	1.21787	1.02208	1.23695	0.990142	1.16883
aPF14_0292_0	aPF14_0292_0	0.930006	0.930006	0.947029	1.00628	0.957246	0.864618	0.947823	0.925868	1.02243	0.965422
aPF10_0183_0	aPF10_0183_0	0.926233	0.926233	0.929161	1.16642	0.898468	0.8396	0.993203	0.822481	0.980358	1.04537
aPF14_0175_5	aPF14_0175_5	0.955473	0.955473	0.959934	1.08419	0.895319	0.871623	0.947823	0.889867	0.988185	0.967446
aMAL8P1.138_0	aMAL8P1.138_0	1.09695	1.09695	1.25377	0.971657	1.23434	1.33696	0.980826	1.24711	1.0508	1.12329
aPFE1485w_2	aPFE1485w_2	0.930949	0.930949	0.924197	1.25731	0.895319	0.809578	0.931321	0.845559	1.01656	0.928991
aPF10_0295_0	aPF10_0295_0	1.14506	1.14506	1.07806	0.890505	1.11994	1.21987	1.07984	1.21757	1.00188	1.10305
aPF07_0086_0	aPF07_0086_0	1.00452	1.00452	1.05821	1.08094	0.923659	0.888635	1.02517	0.923099	0.988185	0.950243
aPF10_0065_0	aPF10_0065_0	1.00829	1.00829	1.02446	1.03982	0.924708	1.02373	0.943697	0.955407	0.93633	0.966434
aPF10_0203_0	aPF10_0203_0	0.897937	0.897937	1.05424	0.977067	1.10314	1.06676	1.02002	1.05972	0.961768	0.986674
aPF11_0460_0	aPF11_0460_0	1.14506	1.14506	1.09792	0.996543	0.896369	0.918656	1.09428	0.941561	0.935351	0.952267
aPFL0950c_2	aPFL0950c_2	1.01395	1.01395	1.11579	0.91972	1.14723	1.05375	1.00455	1.15203	0.977423	1.0312
aPFE0745w_0	aPFE0745w_0	1.11393	1.11393	1.15947	0.893751	1.08635	1.02373	1.03136	1.16126	1.05961	1.14454
aMAL8P1.144_1	aMAL8P1.144_1	1.11488	1.11488	1.12274	1.02251	1.18711	1.12881	1.07055	1.17511	1.13886	1.02412
aMAL13P1.103_1	aMAL13P1.103_1	1.00075	1.00075	0.948022	0.856962	1.19236	1.16283	1.02621	1.14649	0.961768	0.960362
aPFC0450w_0	aPFC0450w_0	1.04696	1.04696	1.04531	0.740104		1.27491	1.04271	1.36065	1.01265	1.0818
aPFI0550w_3	aPFI0550w_3	1.01961	1.01961	0.904343	1.12747	0.874327	0.871623	0.96845	0.831712	0.976444	0.965422
aPF14_0551_1	aPF14_0551_1	1.10073	1.10073	0.970854	0.985723	0.962494	1.05275	1.00661	0.958177	0.989163	0.971494
aPFF0325c_2	aPFF0325c_2	1.0215	1.0215	1.0185	1.00087	1.00868	0.996712	1.0293	1.03479	1.06841	1.02715
aPF14_0741_1	aPF14_0741_1	1.05451	1.05451	0.810037	0.944606	0.986635	0.969693	1.09221	0.965562	0.940243	1.11216
aMAL13P1.32_0	aMAL13P1.32_0	0.937552	0.937552	1.01453	1.05822	1.04646	0.988706	1.03549	1.01541	1.01558	1.00185
aPFC0355c_0	aPFC0355c_0	0.991315	0.991315	1.1277	1.10583	0.737877	0.690493	0.942666	0.77448	0.98525	0.878393
aPFF1450w_0	aPFF1450w_0	1.07243	1.07243	0.969861	0.914309	1.04646	1.03574	1.03136	0.966485	0.937308	0.947207
aPF14_0733_0	aPF14_0733_0	1.13846	1.13846	1.08402	1.00087	1.15562	1.10379	1.1149	1.13172	1.03711	1.03727
aPFA0540c_0	aPFA0540c_0	1.0564	1.0564	1.01056	0.8667	1.03387	1.16884	0.947823	1.11972	1.01265	1.02918
aPFE0840c_3	aPFE0840c_3	1.00735	1.00735	1.05722	1.029	0.955147	1.01673	0.969481	0.948946	0.941222	0.919883
aPFF0100w_1	aPFF0100w_1	1.15355	1.15355	0.982766	0.963	1.10839	1.21487	1.17575	1.12987	1.042	1.08686
aPF13_0340_0	aPF13_0340_0	0.932836	0.932836	0.903351	1.02143	0.905815	0.902645	0.982889	0.819712	0.860014	1.01906
aPFE0675c_0	aPFE0675c_0	1.04036	1.04036	0.992693	1.05822	0.882724	0.988706	1.02105	0.9471	0.997969	0.904704
aPF10_0375_1	aPF10_0375_1	1.01772	1.01772	1.01056	0.934868	0.969842	0.902645	1.0623	0.967408	0.88741	0.988698
aPFL0555c_0	aPFL0555c_0	1.04602	1.04602	0.962912	0.982477	0.938353	0.907649	0.948854	0.895406	0.873712	0.952267
aPFC0210c_0	aPFC0210c_0	1.09318	1.09318	1.12274	0.95759	1.17032	1.24889	1.08706	1.0911	1.14571	1.07674
aMAL7P1.167_2	aMAL7P1.167_2	1.00358	1.00358	1.03736	1.08419	0.999231	0.959686	0.89316	0.933253	1.01362	0.95935
aPF10_0224_1	aPF10_0224_1	0.961132	0.961132	1.04431	0.798533	0.936254	1.06876	0.933383	1.10587	0.907956	0.967446
aPFF0335c_0	aPFF0335c_0	0.969621	0.969621	1.15549	1.06579	1.11469	1.10579	1.11078	1.17787	1.09874	1.0393
aPF14_0093_1	aPF14_0093_1	1.04413	1.04413	1.02049	0.838568	1.0937	1.23388	1.04786	1.1188	0.888388	0.968458
arpl36_0	arpl36_0	0.888505	0.888505	0.758417	0.853716	0.557344	0.803574	0.921007	0.749556	0.949049	0.846009
aPF14_0187_0	aPF14_0187_0	0.944154	0.944154	0.901365	1.08743	1.10839	1.00372	0.952979	0.965562	1.08896	1.03626
aPF10_0284_2	aPF10_0284_2	1.0696	1.0696	0.948022	0.761744	1.12204	1.22287	0.916882	1.24249	1.04787	0.955303
aPFC0175w_0	aPFC0175w_0	0.970564	0.970564	0.949014	0.943524	0.982437	0.952681	0.897286	1.00064	0.902086	1.05043
aPFC0245c_2	aPFC0245c_2	0.962075	0.962075	0.961919	1.05822	0.866979	0.893639	0.946791	0.909253	0.976444	0.937087
bHB3vsa_133	bHB3vsa_133					0.387307	#N/A	#N/A	#N/A	#N/A	#N/A
aPF14_0084_7	aPF14_0084_7	0.983769	0.983769	1.15351	0.913227	0.996082	1.19385	0.954011	1.15941	1.02145	0.972506
aMAL8P1.200_0	aMAL8P1.200_0	1.01772	1.01772	0.977803	0.951098	1.10209	1.14982	1.05405	1.1391	0.925567	1.05144
aPFI0335w_1	aPFI0335w_1	1.01018	1.01018	0.915263	0.975985	1.02652	1.04174	1.01692	0.899098	0.943179	1.05549
aPFL1365w_0	aPFL1365w_0	1.12242	1.12242	1.21803	0.872111	1.32461	1.15683	1.0819	1.36803	1.07037	1.15669
aPFD0415c_0	aPFD0415c_0	1.05545	1.05545	1.02843	1.10583	1.01917	0.955683	0.988046	1.00618	1.11146	1.05852
aPFE1050w_0	aPFE1050w_0	1.03187	1.03187	1.10189	1.01927	1.25114	1.2589	1.01796	1.33665	1.22007	1.09799
aPF10_0348_1	aPF10_0348_1	1.12148	1.12148	1.0056	0.906735	1.03702	1.13381	1.06024	1.12433	1.0146	0.992746
aPFB0175c_1	aPFB0175c_1	1.08564	1.08564	1.10884	0.878603	1.09684	0.99371	0.857063	0.977562	0.923611	1.06156
aPFD0320c_3	aPFD0320c_3	1.05168	1.05168	1.1277	1.05497	1.06536	0.980701	1.07777	1.06803	1.13984	1.05549
aPFD0630c_0	aPFD0630c_0	1.10073	1.10073	1.07509	0.824502	1.09579	1.04675	1.07777	1.04033	0.872734	1.06156
aPFI1315c_0	aPFI1315c_0	0.958302	0.958302	1.07012	0.797451	1.05801	0.953681	1.17988	0.975716	0.827727	1.03322
aPF14_0362_0	aPF14_0362_0	0.938495	0.938495	0.943058	1.01386	0.866979	0.989707	0.995265	0.989562	1.02243	0.958338
aPF10_0082_0	aPF10_0082_0	1.02621	1.02621	0.993686	0.893751	1.17137	1.18184	1.03652	1.18526	1.05178	1.08484
aMAL13P1.245_0	aMAL13P1.245_0	0.946041	0.946041	0.961919	1.0896	0.91946	0.984704	0.971544	0.849251	1.02047	0.962386
aPFB0400w_1	aPFB0400w_1	1.01867	1.01867	0.896402	0.967329	0.918411	0.994711	0.955042	0.979408	0.957855	0.864225
aPFL0475w_1	aPFL0475w_1	1.01678	1.01678	1.03439	1.029	1.04017	0.982702	0.971544	0.986793	1.04395	0.970482
aPFE1055c_1	aPFE1055c_1	0.985655	0.985655	0.945044	1.01169	1.00133	1.03774	0.941634	1.08926	1.00873	0.90774
aPFL0035c_1	aPFL0035c_1	1.07337	1.07337	1.00957	0.890505	1.17662	1.25089	1.00145	1.20464	1.0782	1.17591
aPF10_0290_0	aPF10_0290_0	1.06583	1.06583	1.09097	0.91972	1.0895	1.11179	1.10356	1.17326	1.01852	1.01096
aPFL1600c_0	aPFL1600c_0	0.950757	0.950757	1.04233	1.07337	1.03702	0.959686	1.10975	0.960946	0.977423	1.00185
aPFE1485w_0	aPFE1485w_0	1.04602	1.04602	1.0324	1.04199	1.03282	1.05575	0.962262	1.09941	1.08407	1.02715
aPF14_0547_4	aPF14_0547_4	0.970564	0.970564	1.07211	0.911063	1.01812	1.00472	0.907599	0.94433	0.982315	1.05751
aPF10_0224_5	aPF10_0224_5	0.999804	0.999804	1.10685	1.03982	0.934155	0.994711	1.05921	1.02741	0.940243	0.927979
aPF14_0079_1	aPF14_0079_1	1.03753	1.03753	0.946036	1.05497	0.933105	0.969693	1.01796	0.927714	0.972531	0.930003
aPF13_0104_1	aPF13_0104_1	0.92246	0.92246	0.93611	0.967329	0.792457	0.936669	0.92307	0.933253	0.891323	0.866249
aPF14_0755_0	aPF14_0755_0	1.12336	1.12336	0.964898	1.21187	0.896369	0.898642	1.01796	0.882483	1.00971	0.98465
aPFL1230w_1	aPFL1230w_1	0.883789	0.883789	0.92519	1.00195	0.905815	0.873624	0.933383	0.821558	0.910891	0.980602
aPFL0335c_0	aPFL0335c_0	0.945097	0.945097	0.972839	1.03117	0.989784	0.902645	1.04065	0.909253	0.912848	0.995781
aPFC0875w_0	aPFC0875w_0	0.732875	0.732875	0.951993	1.05605	0.911063	0.913653	1.02827	0.916637	0.993077	0.982626
aPFA0210c_1	aPFA0210c_1	1.02621	1.02621	1.01056	0.931622	1.0916	1.01673	0.963293	1.01079	1.00286	1.03221
aPF11_0464_0	aPF11_0464_0	1.04036	1.04036	0.986737	1.06687	1.02757	0.985704	0.937509	0.987716	1.06059	0.942147
aPFC0925w_0	aPFC0925w_0	1.02433	1.02433	1.00361	1.03225	1.04017	1.09879	0.98392	1.04956	1.04689	1.04942
aPF10_0142_0	aPF10_0142_0	0.991315	0.991315	0.975817	1.0474	1.13253	1.01773	1.01899	1.03849	0.986228	1.05245
aMAL7P1.16_0	aMAL7P1.16_0	1.03282	1.03282	1.18726	1.06363	1.06746	0.991709	0.980826	1.00433	1.21811	0.982626
aMAL7P1.202_1	aMAL7P1.202_1	0.963962	0.963962	0.939088	0.94136	1.02967	0.975697	0.936478	1.00064	0.950027	0.975542
aPF13_0149_0	aPF13_0149_0	0.995088	0.995088	0.994678	1.11232	0.934155	0.884632	1.00248	0.900022	0.935351	0.926967
aPF14_0059_2	aPF14_0059_2	0.980939	0.980939	1.03637	0.958672	1.01497	1.04475	1.07674	0.972946	0.952963	0.939111
aMAL13P1.138_0	aMAL13P1.138_0	1.01961	1.01961	1.0195	1.1437	1.08215	1.06276	1.11593	1.12618	1.21517	1.06156
ac1rRNA18s_1	ac1rRNA18s_1	0.960189	0.960189	1.06317	1.1134	0.997131	0.872623	0.925133	0.850174	1.03123	0.96947
bHB3vsa_239	bHB3vsa_239	1.06866	1.06866				#N/A	#N/A	#N/A	#N/A	#N/A
aMAL8P1.19_0	aMAL8P1.19_0	0.854549	0.854549	1.01255	0.815845	1.00448	1.1138	0.992171	1.02741	1.07233	1.02918
aPFL0280c_0	aPFL0280c_0	0.979996	0.979996	1.03141	0.958672	0.921559	0.934668	0.853969	1.00249	0.990142	0.95935
aMAL13P1.19_4	aMAL13P1.19_4	1.16204	1.16204	1.03637	0.874275	1.13253	1.18485	1.15513	1.12064	1.01852	1.01906
aPF10_0147_0	aPF10_0147_0	1.04036	1.04036	1.04034	0.999789	1.00973	1.01272	1.0293	0.994178	1.03319	1.08585
aPF14_0208_0	aPF14_0208_0	0.995088	0.995088	1.09693	1.01818	0.978238	0.959686	0.955042	0.954484	0.965682	1.01299
aPF10_0337_0	aPF10_0337_0	1.04602	1.04602	0.985744	0.968411	1.01497	0.990708	0.963293	1.02372	0.952963	1.03019
aPF08_0050_1	aPF08_0050_1	0.968678	0.968678	0.901365	0.892669	1.00763	0.990708	0.941634	0.929561	0.883496	0.960362
aPFC0145c_0	aPFC0145c_0	0.991315	0.991315	0.951993	1.12747	0.940452	0.924661	1.00867	0.949869	1.04298	0.988698
aMAL8P1.22_0	aMAL8P1.22_0	0.967735	0.967735	0.905336	0.959754	0.856483	0.877627	1.06127	0.912022	0.938287	0.895596
aPF14_0406_1	aPF14_0406_1	0.966791	0.966791	0.931146	0.893751	1.00133	1.02173	0.985983	0.9831	0.944157	1.02513
aPFB0950w_0	aPFB0950w_0	1.0696	1.0696	1.15847	0.726037	1.25114	1.43903	0	1.48804	0.818922	1.0818
aPF14_0220_1	aPF14_0220_1	1.00829	1.00829	0.916256	0.899161	1.12938	1.05475	1.0128	1.03849	0.976444	1.11115
aPF10_0242_0	aPF10_0242_0	1.03093	1.03093	1.11678	0.963	1.13253	1.1158	1.09428	1.15941	1.09483	0.971494
aPFC0690c_0	aPFC0690c_0	1.02999	1.02999	1.02942	1.04091	1.00868	0.996712	1.15719	0.981254	0.980358	1.03626
aPFF0135w_0	aPFF0135w_0	0.880016	0.880016	0.92519	1.15452	0.774614	0.846605	0.997328	0.805865	0.968617	0.872321
aPF11_0220_0	aPF11_0220_0	0.915858	0.915858	1.00063	0.995461	1.03177	0.973696	0.944729	1.03941	0.995034	0.988698
aPF14_0115_0	aPF14_0115_0	1.00169	1.00169	1.0463	0.980313	1.09475	0.994711	1.05302	1.06156	0.976444	1.05549
aPF14_0704_0	aPF14_0704_0	1.02904	1.02904	1.03538	1.00412	1.02547	1.13381	1.01074	1.12064	1.08407	0.942147
aPFE1465w_2	aPFE1465w_2	0.979053	0.979053	0.952985	0.986805	1.04017	0.996712	0.998359	1.02464	1.00775	1.06156
aPF10_0045_1	aPF10_0045_1	1.04602	1.04602	0.997656	1.14694	1.03597	0.920658	0.992171	0.984024	1.03319	1.06864
aPF11_0271_0	aPF11_0271_0	0.996974	0.996974	1.17535	1.11773	1.14513	1.09578	0.997328	1.16126	1.20148	1.07472
aPF14_0156_0	aPF14_0156_0	1.07715	1.07715	1.13366	0.74876	1.26058	1.30493	1.05508	1.34588	1.13103	1.15567
aPFA0255c_1	aPFA0255c_1	0.97528	0.97528	0.971846	1.11448	0.903716	1.01873	0.988046	0.888944	0.956876	0.877381
aMAL8P1.18_0	aMAL8P1.18_0	0.887562	0.887562	0.908314	1.08743	0.798755	0.772552	0.924101	0.787403	0.939265	0.871309
aMAL13P1.211_0	aMAL13P1.211_0	1.00641	1.00641	0.994678	0.862372	0.910014	0.960686	1.04993	0.924945	0.871755	0.982626
aPFB0230c_1	aPFB0230c_1	0.977167	0.977167	0.941073	1.01602	0.897418	0.943674	0.833341	0.954484	1.02634	0.865237
aPF14_0508_0	aPF14_0508_0	0.995088	0.995088	0.926183	1.22377	0.788259	0.79757	0.954011	0.718171	0.951984	0.905716
aPFE0945c_0	aPFE0945c_0	0.912085	0.912085	0.982766	1.12206	0.836541	0.786562	0.925133	0.811404	0.952963	0.939111
aPF14_0195_2	aPF14_0195_2	0.887562	0.887562	0.959934	1.07878	0.86488	0.966691	0.979795	0.892637	1.05178	0.981614
aPF13_0175_0	aPF13_0175_0	0.977167	0.977167	1.02446	0.985723	0.917361	0.964689	1.0623	0.934176	0.944157	0.994769
aPF14_0270_0	aPF14_0270_0	0.980939	0.980939	0.920226	0.999789	0.873277	0.927663	0.950917	0.922176	0.879582	0.947207
aPF14_0651_0	aPF14_0651_0	0.967735	0.967735	0.892431	1.15127	0.9457	0.925661	1.11284	0.877867	0.986228	0.995781
aPF14_0183_1	aPF14_0183_1	0.9517	0.9517	1.08601	0.943524	1.15667	0.975697	0.973607	0.964638	0.978401	1.03221
aPF11_0324_2	aPF11_0324_2	0.85172	0.85172	0.945044	1.2703	0.758869	0.764546	1.01589	0.742172	0.999926	0.839938
aPF10_0046_1	aPF10_0046_1	1.08186	1.08186	1.06317	0.947852	0.94675	1.16984	0.936478	1.11603	1.03613	1.00388
aPF07_0088_0	aPF07_0088_0	1.10639	1.10639	1.02644	1.12422	1.00238	0.859614	0.970513	0.967408	1.02439	1.04638
aPF13_0235_1	aPF13_0235_1	0.986599	0.986599	1.01652	1.10583	0.898468	0.941673	1.19122	0.921253	1.01362	0.931015
aPF14_0722_4	aPF14_0722_4	1.06866	1.06866	1.09494	0.917555	1.20076	1.08578	1.02105	1.19449	1.15549	1.01501
aMAL13P1.35_1	aMAL13P1.35_1	0.996974	0.996974	1.19818	0.905653	1.06746	0.975697	0.962262	0.960946	0.918719	1.00287
aPFE0670w_0	aPFE0670w_0	1.26673	1.26673	1.18031	0.628655	1.76125	1.8213	1.08912	1.68281	0.995034	1.11722
aPF11_0414_1	aPF11_0414_1	0.868697	0.868697	0.856694	1.1134	0.819747	0.941673	0.930289	0.806789	0.938287	0.893572
aPFD0125c_0	aPFD0125c_0	1.00735	1.00735	0.996664	0.948934	0.980338	0.929664	1.02724	0.9711	0.949049	0.993757
aPFE1130w_0	aPFE1130w_0	0.980939	0.980939	0.979788	1.26921	0.900567	0.891637	0.976701	0.890791	1.03221	0.990722
aPF08_0109_1	aPF08_0109_1	1.01961	1.01961	1.10288	1.01277	1.29837	1.03874	1.01692	1.02279	1.00873	1.02209
aPF14_0124_1	aPF14_0124_1	1.19222	1.19222	1.22399	0.787713	1.34875	1.32995	1.13141	1.40219	1.13103	1.22752
aPF14_0300_1	aPF14_0300_1	0.999804	0.999804	0.923204	0.875357	1.07795	1.03574	1.01899	1.00802	0.888388	1.13037
aMAL8P1.110_0	aMAL8P1.110_0	0.988485	0.988485	1.01354	0.986805	1.01497	1.02373	0.996297	0.937869	0.999926	0.972506
aPFC0150w_0	aPFC0150w_0	0.942268	0.942268	0.955963	1.06796	0.968792	0.912652	0.985983	0.93233	0.989163	0.994769
aPFI0225w_0	aPFI0225w_0	0.938495	0.938495	0.934124	0.981395	0.884823	0.886633	0.946791	0.904637	0.894258	0.970482
aPF07_0089_0	aPF07_0089_0	0.918687	0.918687	1.00163	1.02684	0.962494	0.880629	0.978763	0.948023	0.987207	0.996793
aPF10_0049_1	aPF10_0049_1	0.972451	0.972451	0.858679	1.13504	0.841789	0.901644	0.969481	0.824327	0.890345	0.965422
aPFI0885w_0	aPFI0885w_0	1.04508	1.04508	1.0602	0.872111	1.15877	1.10979	0.935446	1.12803	1.00971	1.08888
aPFB0380c_1	aPFB0380c_1	0.974337	0.974337	0.996664	1.05605	1.01393	1.07277	0.999391	1.04126	1.04102	1.01602
aPFB0700c_1	aPFB0700c_1	1.06489	1.06489	1.00858	0.907817	1.10944	1.1158	0.943697	1.09572	1.04787	1.05448
aPF11_0408_1	aPF11_0408_1	0.931892	0.931892	0.978795	1.04199	0.913162	0.900643	1.03755	0.973869	1.08015	0.958338
aMAL13P1.134_0	aMAL13P1.134_0	1.04508	1.04508	0.981773	0.984641	1.02757	1.01473	0.950917	1.02187	1.02243	0.924943
aMAL7P1.17_2	aMAL7P1.17_2	0.980939	0.980939	0.977803	1.04523	0.948849	0.99371	1.04168	1.00156	1.07526	0.932027
aMAL13P1.52_2	aMAL13P1.52_2	0.956416	0.956416	1.00957	1.0355	0.9457	0.969693	1.03446	0.976639	0.931438	0.970482
aPF10_0361_1	aPF10_0361_1	0.970564	0.970564	1.02644	0.951098	0.929956	1.08578	0.924101	0.994178	0.995034	0.90268
aPF10_0167_1	aPF10_0167_1	0.820594	0.820594	0.889453	1.15993	0.908964	0.869621	0.898317	0.919407	0.956876	0.88244
aPFD0830w_0	aPFD0830w_0	1.14977	1.14977	1.05821	0.95218	1.08425	1.13881	1.01177	1.08649	1.02732	1.0393
aPF13_0233_0	aPF13_0233_0	1.04791	1.04791	1.00461	0.988969	1.09684	1.07377	1.03755	1.10033	1.06744	1.09293
bDd2rif_7	bDd2rif_7	1.16109	1.16109	1.06715	0.987887	1.22595	1.07377	1.06952	1.22403	1.02145	1.08079
aPFE0450w_2	aPFE0450w_2	0.935665	0.935665	0.94008	1.03982	0.860682	0.898642	0.897286	0.896329	1.00775	0.883452
aPFI0590c_0	aPFI0590c_0	1.26202	1.26202	1.1684		1.32356	1.38699	1.07777	1.32834	1.03417	1.21234
aMAL13P1.356_0	aMAL13P1.356_0	1.46386	1.46386	1.17733		1.19761	0	0	1.21295	0	0.928991
aMAL13P1.328_1	aMAL13P1.328_1	0.967735	0.967735	0.98773	1.30276	0.978238	0.869621	0.979795	0.929561	1.03515	1.0312
aPFL1935c_1	aPFL1935c_1	0.897937	0.897937	0.897394	1.11232	0.889021	0.915654	0.954011	0.924022	0.890345	1.00489
aPFF0295c_0	aPFF0295c_0	0.993201	0.993201	1.17039	0.95759	0.998181	0.911651	0.960199	0.966485	0.964703	1.02715
aPFL2190c_2	aPFL2190c_2	1.02433	1.02433	1.03637	1.09501	0.97299	0.967691	0.970513	0.934176	0.972531	0.898632
bDd2var_183	bDd2var_183	1.06017	1.06017	1.02545	0.93054	1.0706	1.21887	0.982889	1.11049	1.0009	1.05245
aMAL13P1.339_0	aMAL13P1.339_0	1.0149	1.0149	1.09097	1.10475	0.977189	0.950679	0.956073	0.996947	1.06939	0.909764
aPFI0495w_1	aPFI0495w_1	0.936608	0.936608	0.93611	0.960836	0.998181	1.08177	1.0293	0.994178	0.953941	1.00489
aPFA0385w_1	aPFA0385w_1	1.1111	1.1111	0.982766	0.705479	1.0853	1.14982	0.928227	1.12157	0.931438	0
aPF07_0039_0	aPF07_0039_0	1.03753	1.03753	1.02644	0.881849	1.23015	1.13381	1.03136	0	1.0645	1.15972
aPF11_0426_0	aPF11_0426_0	1.00452	1.00452	1.15152	1.00304	1.21125	1.16683	0.96123	1.09941	1.14082	1.08382
aMAL13P1.225_0	aMAL13P1.225_0	0.913971	0.913971	0.934124	1.029	1.00553	0.999714	0.975669	0.984947	1.04004	1.00691
aMAL8P1.1_2	aMAL8P1.1_2	1.01678	1.01678	1.07012	0.993297	0.844938	1.00572	1.03136	0.889867	0.833598	0.901668
aPF11_0357_1	aPF11_0357_1	0.960189	0.960189	1.00758	1.06579	0.904766	0.977699	1.05818	0.888021	1.06939	0.936075
aPFI0825w_0	aPFI0825w_0	1.04885	1.04885	1.04828	0.878603	1.04961	1.06876	0.852937	0	0.968617	0.994769
aPFL1645w_3	aPFL1645w_3	0.980939	0.980939	0.988722	1.13504	0.831293	0.873624	1.04374	0.876944	0.989163	0.861189
aPF13_0273_0	aPF13_0273_0	0.999804	0.999804	0.985744	1.09825	1.03387	1.05475	0.989077	1.03756	1.03906	1.02108
aPF11_0375_0	aPF11_0375_0	1.0281	1.0281	1.03042	0.999789	1.05801	1.13981	1.06024	1.01726	1.02047	1.0737
aPF14_0171_1	aPF14_0171_1	1.0215	1.0215	1.00063	1.06796	0.745224	0.930665	0.963293	0.838174	0.930459	0.795411
aPFL0075w_1	aPFL0075w_1	1.04791	1.04791	1.02942	1.00412	1.0895	1.18285	1.05715	1.14557	1.13592	1.11519
aPF13_0090_0	aPF13_0090_0	0.930949	0.930949	0.879526		0.860682	0.89564	0.965356	0.890791	0.996991	0.942147
aPFA0470c_0	aPFA0470c_0	1.09318	1.09318	1.11082	0.728201	1.3435	1.36197	0.977732	1.37819	1.06939	1.08989
aPF14_0631_2	aPF14_0631_2	1.11299	1.11299	0.966883	0.992215	1.07165	0.990708	1.16131	0.980331	0.93633	1.00084
aPFC0395w_1	aPFC0395w_1			1.16939	1.05605	1.26058	0.961687	0	1.04864	0	0
bDd2ste_10	bDd2ste_10	1.15166	1.15166	1.02446	1.03333	0.941502	0.986705	1.06643	0.948946	0.91774	1.09698
aPF10_0338_0	aPF10_0338_0	0.992258	0.992258	1.1406	1.09393	0.890071	0.801573	1.08603	0.842789	0.958833	1.08989
aPF14_0487_0	aPF14_0487_0	0.99886	0.99886	1.10288	0.955426	0.995032	1.29392	1.02621	1.20372	1.13005	0.961374
aMAL13P1.88_1	aMAL13P1.88_1	0.947927	0.947927	0.946036	1.19455	0.882724	0.866619	0.897286	0.923099	1.18093	0.921907
aMAL8P1.81_0	aMAL8P1.81_0	1.01301	1.01301	0.978795	0.959754	1.26058	1.04875	0.966387	1.09203	1.09385	1.02918
aPFF1370w_4	aPFF1370w_4	1.04225	1.04225	1.1823	1.03117	1.07375	1.13781	1.08396	1.16957	1.10461	0.967446
aPFC0120w_1	aPFC0120w_1	1.13563	1.13563	1.09693	0.835322	1.17871	1.19886	1.01383	1.1788	0.892302	1.07573
aPF11_0445_0	aPF11_0445_0	1.04696	1.04696	1.06119	0.947852	1.0769	1.1238	1.16544	1.05233	1.03808	1.16782
aPFE1460w_0	aPFE1460w_0	0.952643	0.952643	1.05325	0.904571	1.23434	1.16283	0.941634	1.2028	0.992099	1.08787
aPFI0225w_2	aPFI0225w_2	0.944154	0.944154	0.892431	1.07661	0.913162	0.918656	0.958136	0.919407	0.948071	0.961374
aPFL0955c_0	aPFL0955c_0	1.02527	1.02527	1.07806	0.903489	1.12099	1.00872	1.01899	1.08372	0.924589	1.00489
aPFI1010w_1	aPFI1010w_1	0.995088	0.995088	0.980781	0.938114	0.933105	1.01473	0.911725	0.964638	1.02243	0.949231
aPFE0655w_2	aPFE0655w_2	0.967735	0.967735	1.02148	1.08202	0.948849	0.973696	0.981858	0.977562	1.01069	1.00489
aPFI1265w_0	aPFI1265w_0	0.99886	0.99886	1.03836	1.05714	0.951998	1.09078	0.967419	1.0551	1.03026	0.986674
aPFF0445w_4	aPFF0445w_4	0.963962	0.963962	0.955963	1.02792	0.939403	0.917656	1.00455	0.926791	0.928503	0.952267
aPFI0170w_1	aPFI0170w_1	0.977167	0.977167	0.904343	0.987887	0.873277	0.963689	1.02208	0.900945	0.87469	0.941135
aPFL1340c_1	aPFL1340c_1	0.947927	0.947927	1.04531	1.27246	1.02442	0.870622	0.99114	0.980331	1.05863	0.993757
aPF14_0439_1	aPF14_0439_1	1.04696	1.04696	0.994678	0.901325	1.04436	1.03774	0.995265	1.01356	0.916762	1.03525
bDd2var_127	bDd2var_127	1.04225	1.04225	1.00758	1.02684	0.914212	0.920658	1.07365	0.993255	0.98525	0.981614
aPF10_0066_0	aPF10_0066_0	1.17052	1.17052	1.21506	0.833158	1.26268	1.2609	1.02311	1.22311	1.11929	1.06966
aPFL2370c_0	aPFL2370c_0	0.963962	0.963962	0.905336	1.09068	0.798755	0.846605	0.888004	0.862174	1.03221	0.908752
bDd2rif_64	bDd2rif_64	1.06866	1.06866	0.969861	0.83965	1.17137	1.18885	1.06024	1.21203	1.05374	1.07978
aPFC0060c_1	aPFC0060c_1	0.963018	0.963018	0.920226	0.933786	1.04751	0.925661	0.988046	0.996947	1.01167	0.992746
aPFL0325w_1	aPFL0325w_1	1.00075	1.00075	0.929161	1.07661	0.913162	0.872623	0.925133	0.856636	0.905999	0.97453
aPFE1530c_0	aPFE1530c_0	0.972451	0.972451	0.946036	1.00845	0.877476	0.907649	0.979795	0.945253	0.977423	0.944171
aPFL1990c_2	aPFL1990c_2	0.965848	0.965848	0.933131	1.03225	0.992933	0.924661	0.987014	0.941561	0.986228	0.98971
aPF14_0486_0	aPF14_0486_0	1.06771	1.06771	0.977803	0.984641	0.997131	1.04074	1.06024	0.999716	0.962747	1.06358
bDd2var_126	bDd2var_126	1.13846	1.13846	1.0592	0.92513	1.05276	1.07377	1.12934	1.18987	1.00873	1.00287
aPF11_0067_1	aPF11_0067_1	0.974337	0.974337	0.848753	0.992215	0.845987	0.910651	0.984952	0.887098	0.970574	0.888512
bHB3vsa_284	bHB3vsa_284	1.04791	1.04791	1.01453	1.01602	0.891121	0.934668	1.00352	0.915714	0.87469	0.977566
aPFF0740c_0	aPFF0740c_0	1.04696	1.04696	0.884489	0.943524	1.00133	1.17384	0.967419	1.18434	1.00971	0.89762
aPF11_0488_2	aPF11_0488_2	0.966791	0.966791	0.971846	1.23242	0.844938	0.8396	0.959168	0.847405	1.00482	0.935063
aPF13_0139_0	aPF13_0139_0	0.996031	0.996031	1.087	0.875357	1.26478	1.08678	1.02311	1.12157	1.05374	1.07472
aPF11_0479_0	aPF11_0479_0	0.905483	0.905483	0.981773	1.19131	1.09789	0.96569	1.06746	1.02095	1.13397	1.01602
aPF14_0438_1	aPF14_0438_1	0.990372	0.990372	0.949014	0.939196	0.936254	1.03574	0.935446	1.03941	0.970574	0.960362
aMAL13P1.380_10	aMAL13P1.380_10	0.931892	0.931892	0.933131	1.02576	0.797705	0.847606	0.936478	0.848328	0.983293	0.890536
aPFA0020w_0	aPFA0020w_0	1.04885	1.04885	1.02347	1.03982	1.00238	1.05475	1.05199	1.05695	0.955898	1.05346
aPFL0100c_1	aPFL0100c_1	0.954529	0.954529	1.0592	1.02684	0.918411	0.957684	0.941634	1.01633	1.087	0.926967
bDd2var_53	bDd2var_53	1.0281	1.0281	0.959934	0.966247	0.932055	0.926662	1.00558	1.00249	0.86882	0.976554
aPFI0805w_1	aPFI0805w_1	0.906426	0.906426	0.911292	1.05281	0.988734	0.882631	0.978763	0.859405	0.944157	0.899644
aPF08_0117_0	aPF08_0117_0	0.876243	0.876243	1.05623	1.25839	0.964593	0.942674	1.05508	0.994178	1.02439	0.946195
bDd2rif_55	bDd2rif_55	0.987542	0.987542	0.953978	1.05173	1.03492	0.944675	1.00145	0.955407	0.99112	1.10103
aPFC0230c_1	aPFC0230c_1	1.05545	1.05545	1.00262	1.01818	1.03702	1.09378	0.969481	1.08464	1.03613	1.03221
aPFL0385c_1	aPFL0385c_1	0.857379	0.857379	0.969861	1.17616	0.922609	0.844603	0.96845	0.89356	1.06254	0.914824
aPF08_0114_2	aPF08_0114_2	0.965848	0.965848	0.997656	1.03658	1.27528	0.953681	1.04993	1.03756	1.0009	1.10406
aMAL7P1.89_3	aMAL7P1.89_3	1.08658	1.08658	1.12671	0.848306	1.206	1.20286	1.03136	1.20557	1.01167	1.07674
aPF13_0181_1	aPF13_0181_1	0.908312	0.908312	0.944051	1.16534	0.8103	0.802573	0.958136	0.771711	0.938287	0.944171
aPFC0165w_2	aPFC0165w_2	1.01584	1.01584	1.08601	0.963	0.960395	1.10779	1.04374	1.12987	1.0009	0.945183
aPF14_0083_0	aPF14_0083_0	0.94887	0.94887	0.945044	1.11989	0.997131	0.9797	1.05405	0.984024	0.971552	0.971494
aPF14_0631_1	aPF14_0631_1	1.0149	1.0149	0.889453	1.06146	0.923659	1.01072	1.02827	0.901868	0.987207	1.03828
aPFC0830w_0	aPFC0830w_0	1.19976	1.19976	1.12174	0.642722	1.40858	1.56011	1.03136	1.52127	1.05472	1.33783
aPF10_0170_0	aPF10_0170_0	1.00924	1.00924	1.03736	0.975985	1.02232	1.04775	0.922039	1.05326	0.931438	1.00793
bDd2var_143	bDd2var_143	1.02621	1.02621	1.08799	0.938114	1.07795	1.04275	1.10253	1.01079	0.963725	1.099
aPF11_0222_0	aPF11_0222_0	0.981883	0.981883	1.02347	0.948934	1.03177	1.02273	0.913788	0.9711	0.968617	1.08989
aPF14_0519_0	aPF14_0519_0	1.10356	1.10356	1.03836	0.909981	1.0748	1.18885	1.07365	1.12618	1.07526	1.05751
aPF10_0217_0	aPF10_0217_0	0.934722	0.934722	1.01255	0.924048		1.19185	0.998359	1.09664	1.0058	0.96441
aPFI0215c_0	aPFI0215c_0	0.97811	0.97811	1.00957	1.17399	1.01497	0.870622	0.954011	0.852943	0.951984	1.11013
aPF10_0195_1	aPF10_0195_1	1.02055	1.02055	1.03439	0.836404	1.20495	1.20686	0.89316	1.07726	0.972531	1.07775
aPFE0965c_0	aPFE0965c_0	1.11676	1.11676	0.988722	1.00304	0.989784	0.968692	1.01692	0.961869	0.9422	1.0059
aPFB0150c_1	aPFB0150c_1	0.959246	0.959246	1.02247		0.845987	0.997713	0.925133	1.00895	1.10364	0.807554
aPFC0960c_2	aPFC0960c_2	0.946041	0.946041	0.968868	1.07661	0.735778	0.85361	0.963293	0.810481	0.964703	0.888512
aMAL13P1.322_1	aMAL13P1.322_1	1.0215	1.0215	1.00063	0.916473		1.16683	1.09737	1.07541	1.00873	1.23258
aPF11_0196_0	aPF11_0196_0	0.988485	0.988485	0.9917	1.07228	0.964593	0.897641	0.982889	0.948023	0.953941	0.986674
aMAL7P1.170_0	aMAL7P1.170_0	1.2158	1.2158	1.06317	0.808271	1.12728	1.38199	1.01383	1.3228	1.06744	1.00793
aMAL8P1.148_0	aMAL8P1.148_0	0.979053	0.979053	1.07112	1.0474	0.802953	0.919657	0.99114	0.949869	0.968617	0.818686
aPFL0410w_0	aPFL0410w_0	0.900766	0.900766	0.984751	1.0355	0.928907	0.836598	0.995265	0.890791	0.937308	0.973518
aPFE1140c_0	aPFE1140c_0	1.00169	1.00169	0.951	1.00087	1.04122	1.03874	1.00042	0.998793	0.998947	1.07573
aMAL13P1.114_0	aMAL13P1.114_0	1.08092	1.08092	1.00163	0.847224	1.17766	1.21887	1.01589	1.17695	0.989163	1.09495
aPF10_0014_0	aPF10_0014_0	1.43274	1.43274				0	0	0.923099	1.11636	0
aPF14_0303_0	aPF14_0303_0	0.990372	0.990372	1.05623	1.09717	0.658107	0.844603	0.902443	0.863098	0.995034	0.872321
aMAL13P1.360_0	aMAL13P1.360_0	0.924347	0.924347	0.964898	0.968411	1.04331	1.15382	0.930289	1.03849	1.06646	0.940123
aMAL13P1.360_1	aMAL13P1.360_1	0.879073	0.879073	0.860665	0.983559	0.957246	0.954682	0.905537	0.864021	0.938287	0.950243
aPF11_0262_0	aPF11_0262_0	1.05262	1.05262	1.05424	1.03117	1.07795	0.938671	0.93854	1.02833	0.906978	1.06662
aPF14_0261_0	aPF14_0261_0	1.13468	1.13468	1.08303	1.10258	1.19026	1.08077	1.04683	1.11141	1.14277	0.955303
aPF10_0343_0	aPF10_0343_0			1.38977			#N/A	#N/A	#N/A	#N/A	#N/A
aPFE1305c_0	aPFE1305c_0	0.914915	0.914915	0.907321	0.959754	0.97509	0.906648	0.988046	0.939715	0.922632	1.014
aPF14_0727_1	aPF14_0727_1	0.963962	0.963962	0.973832	1.09934	0.863831	0.882631	1.05818	0.863098	0.924589	0.980602
aMAL13P1.535_0	aMAL13P1.535_0	1.16864	1.16864	1.15053	1.05714	1.3519	1.16083	1.09634	1.21664	1.12712	1.18603
aPFL0165c_0	aPFL0165c_0	1.03187	1.03187	1.00461	0.966247	1.06116	1.1228	0.948854	1.0791	1.01656	1.16175
aPFL1595w_0	aPFL1595w_0	1.00829	1.00829	1.05523	1.17183	1.02127	0.879628	1.08293	0.935099	1.01265	1.03525
bDd2rif_71	bDd2rif_71	0.963018	0.963018	0.890446	0.86129	0.960395	0.912652	0.988046	0.98587	0.905021	1.09293
aPFF0995c_0	aPFF0995c_0	0.989428	0.989428	1.03736	1.07661	0.912113	0.871623	0.924101	0.873252	0.949049	0.988698
aPF07_0075_0	aPF07_0075_0	0.937552	0.937552	1.09295	0.871029	1.18921	1.1208	1.02002	1.15572	0.937308	1.0646
aPFC0165w_1	aPFC0165w_1	0.941325	0.941325	0.954971	1.09393	0.835491	0.922659	1.02105	0.896329	1.01949	0.967446
aPF13_0035_1	aPF13_0035_1	0.995088	0.995088	0.998649	1.07553	1.01812	0.917656	0.904505	1.05233	1.1007	0
aMAL13P1.116_3	aMAL13P1.116_3	0.996031	0.996031	0.973832	0.968411	1.01602	0.983703	0.98392	1.00525	1.01754	1.05549
aPFI0440w_0	aPFI0440w_0	0.983769	0.983769	0.915263	0.987887	0.992933	0.924661	1.06746	0.970177	0.958833	0.990722
aPFF1475c_1	aPFF1475c_1	0.940381	0.940381	1.00262	0.865618	0.9478	1.00972	1.08912	1.05233	0.891323	0.973518
aPFE0705c_1	aPFE0705c_1	0.929063	0.929063	1.01652	1.1556	0.929956	0.858613	0.955042	0.954484	1.04982	0.993757
aPF10_0224_2	aPF10_0224_2	1.11582	1.11582	1.10288	1.06038	1.01707	1.03374	0.878721	1.09295	1.17115	0.858153
aPF10_0166_0	aPF10_0166_0	1.02904	1.02904	1.04828	1.07337	1.13253	1.05475	1.01692	1.0311	1.03515	1.10811
aPF11_0278_0	aPF11_0278_0	0.952643	0.952643	0.982766	0.854798	1.01707	1.1248	1.1149	1.18803	0	0.919883
aPFI0605c_0	aPFI0605c_0	0.939438	0.939438	0.903351	1.12098	1.01183	0.826591	1.0654	0.851097	1.02145	1.03019
aPFL0790w_0	aPFL0790w_0	0.989428	0.989428	0.992693	1.07445	0.940452	0.9797	0.98392	0.984947	1.03808	1.00185
aPF13_0024_1	aPF13_0024_1	1.01207	1.01207	1.01552	1.08635	1.00553	0.996712	0.987014	1.04864	1.042	0.972506
aPF14_0170_2	aPF14_0170_2	1.01207	1.01207	1.1009	1.15344	1.0727	0.984704	1.02105	1.08926	1.10951	0.955303
aPFL1130c_3	aPFL1130c_3	0.841344	0.841344	1.06913	1.09393	0.802953	0.729521	0.910694	0.753249	0.916762	0.928991
aPFF1275c_0	aPFF1275c_0	0.971507	0.971507	0.969861	1.01386	0.940452	0.919657	0.885941	0.921253	0.930459	0.950243
aPFI1260c_0	aPFI1260c_0	1.04319	1.04319	0.970854	1.04632	1.05486	0.978699	1.00661	0.902791	0.921654	0.96947
aMAL13P1.234_6	aMAL13P1.234_6	1.05074	1.05074	1.05722	0.992215	0.97404	0.973696	1.01796	1.0071	0.900129	1.01602
aPF11_0176_1	aPF11_0176_1	0.981883	0.981883	1.0602	1.00845	0.987685	0.936669	0.927195	0.91756	0.901107	1.00793
aMAL13P1.405_1	aMAL13P1.405_1	0.934722	0.934722	1.02545	0.902407	0.949899	0.984704	0.931321	0.972023	0.884474	0.962386
aPF13_0331_0	aPF13_0331_0	1.0281	1.0281	0.990708	1.05064	0.869079	0.932666	1.0128	0.865867	0.943179	0.968458
aPFE1295c_0	aPFE1295c_0	0.941325	0.941325	0.912285	0.837486	0.985586	0.969693	0.919976	0.980331	0.916762	0.910776
aPF14_0479_0	aPF14_0479_0	1.04319	1.04319	0.970854	0.994379	0.968792	0.972695	1.12419	1.04033	0.982315	1.05954
aMAL7P1.127_2	aMAL7P1.127_2	0.899823	0.899823	0.947029	1.08202	0.849136	0.896641	0.954011	0.787403	0.815986	0.889524
aPFD0960c_0	aPFD0960c_0	1.01678	1.01678	1.05523	1.02143	1.0727	1.05375	0.93854	1.06895	1.03613	1.01501
aPFC0365w_0	aPFC0365w_0	0.944154	0.944154	1.0463	0.907817	0.931006	0.880629	1.04168	0.957254	0.895237	1.03828
bDd2rif_59	bDd2rif_59	1.07149	1.07149	0.989715	0.893751	0.983486	1.03274	1.01796	0.998793	0.877626	1.01602
aPFL1475w_0	aPFL1475w_0	0.971507	0.971507	0.954971	1.01277	0.989784	1.01673	0.96123	0.973869	0.99112	1.02816
aPFI0465c_1	aPFI0465c_1	0.935665	0.935665	0.951993	1.08635	0.86488	0.883631	1.0097	0.790173	0.964703	0.998817
aPF14_0271_0	aPF14_0271_0	0.987542	0.987542	1.05821	0.958672	0.982437	0.985704	0.909662	0.973869	0.904043	0.894584
aPF08_0040_1	aPF08_0040_1	1.01961	1.01961	0.974825	1.02143	1.05381	0.89564	0.93854	0.884329	1.01167	0.980602
aPFL0290w_1	aPFL0290w_1	1.05451	1.05451	0.990708	1.05714	1.04436	1.09078	1.00042	1.03202	1.18093	0.942147
aPF10_0138_0	aPF10_0138_0	0.919631	0.919631	0.970854	1.07769	0.97509	0.9797	0.987014	0.946176	1.06254	0.939111
aPFB0150c_4	aPFB0150c_4	0.982826	0.982826	0.982766	0.921884	1.01183	0.983703	1.02002	1.06987	0.940243	1.02007
aPF11_0140_0	aPF11_0140_0	1.04602	1.04602	1.02644	0.991133	1.12099	1.05876	1.02002	1.07264	1.05765	1.14049
aPFC0220w_0	aPFC0220w_0	0.879073	0.879073	0.922212	1.09393	0.887972	0.808578	0.981858	0.890791	0.920675	0.915836
aMAL7P1.207_0	aMAL7P1.207_0	1.05357	1.05357	0.990708	0.963	1.22385	1.14682	1.05715	1.10864	1.00677	1.22752
aPFL2430c_0	aPFL2430c_0	1.09695	1.09695	0.969861	0.862372	0.944651	1.10079	0.956073	1.1031	0.978401	0.914824
aPF11_0504_0	aPF11_0504_0	1.01395	1.01395	1.08998	1.19564	1.03177	0.935669	1.11078	0.955407	1.1144	1.03525
aPFL0820c_0	aPFL0820c_0	1.21486	1.21486	1.11479	0.75958	1.50304	1.46705	1.24279	1.39849	1.07233	1.27913
aPF14_0045_1	aPF14_0045_1	0.870584	0.870584	0.909307	0.869947	0.937304	1.18184	0.889035	0.9831	0.950027	0.881428
aPF11_0129_1	aPF11_0129_1	0.946984	0.946984	0.956956	0.999789	0.881674	0.964689	0.909662	0.912945	1.05178	0.97453
aPF11_0378_0	aPF11_0378_0	0.979996	0.979996	1.05126	1.23026	0.881674	0.819586	0.898317	0.894483	1.09679	0.909764
aMAL8P1.30_1	aMAL8P1.30_1	0.903596	0.903596	1.02347	1.02576	1.09055	0.847606	1.23351	1.00249	1.12125	1.00084
aPF13_0286_1	aPF13_0286_1					0.78406	0	0.951948	0.966485	0.912848	0
aPF10_0326_1	aPF10_0326_1	0.977167	0.977167	0.963905	1.10799	0.904766	0.947677	1.01383	0.972023	1.14375	0.894584
aPFF0825c_1	aPFF0825c_1	1.0347	1.0347	0.957949	0.981395	1.01393	1.03574	0.911725	0.936022	0.899151	0.998817
aPF14_0326_12	aPF14_0326_12	0.984712	0.984712	0.990708	0.958672	1.02127	1.02874	0.942666	1.00802	1.042	0.939111
aPFL0410w_4	aPFL0410w_4	1.02433	1.02433	1.04233	0.988969	1.02757	1.17184	0.987014	1.04956	1.08994	0.943159
aPFL1620w_0	aPFL1620w_0	0.965848	0.965848	1.08402	0.909981	1.14198	1.15483	1.04065	1.22957	1.0782	0.985662
aPFL0425c_2	aPFL0425c_2	1.0215	1.0215	0.964898		1.0769	0	0.973607	1.08833	0.970574	1.04537
aPFL1540c_1	aPFL1540c_1	0.968678	0.968678	1.02247	0.911063	0.977189	1.01673	1.00867	0.948023	0.947092	0.923931
aPF07_0009_0	aPF07_0009_0	1.0215	1.0215	1.01453	1.17075	0.991883	1.02173	1.10356	1.03479	1.05667	0.999829
aPF14_0228_0	aPF14_0228_0	0.99886	0.99886	1.03836	0.929458	1.09684	1.08978	1.05818	1.03664	1.00482	0.996793
aPFI1105w_1	aPFI1105w_1	1.03848	1.03848	1.0185	1.03766	1.07795	0.944675	0.929258	1.00987	1.06352	1.02412
aPF07_0081_0	aPF07_0081_0	0.934722	0.934722	1.11182	1.14803	0.990834	0.975697	0.905537	0.994178	1.04004	1.04537
aPFF1150w_0	aPFF1150w_0	1.05168	1.05168	1.02247	1.05064	0.981387	0.904646	0.943697	0.940638	1.01754	0.963398
aClp_0	aClp_0	0.826253	0.826253	0.754447	0.867782	0.572039	0.6995	0.973607	0.721863	1.08994	0.82577
aPFI0180w_1	aPFI0180w_1	1.21863	1.21863	1.16443	0.794205	1.21545	1.29392	1.02621	1.29788	0.929481	1.17186
aPFF0990c_1	aPFF0990c_1	0.892278	0.892278	1.00758	1.06363	0.781961	0.785561	0.949885	0.815096	0.920675	0.858153
aPFL1130c_4	aPFL1130c_4	1.05923	1.05923	1.03836	0.896997	1.06116	1.04975	0.970513	1.14095	1.04004	1.09192
aPF14_0337_0	aPF14_0337_0	1.06866	1.06866	1.17932	0.807189	1.32356	1.28292	0	1.36249	1.02341	1.08888
aPF14_0687_1	aPF14_0687_1	1.00641	1.00641	1.04133	1.15776	0.86488	0.845604	0.99114	0.811404	1.02047	0.96441
aPFF0990c_0	aPFF0990c_0	1.02527	1.02527	0.953978	0.996543	0.986635	0.893639	1.0819	0.895406	0.955898	0.965422
aPFC0780w_2	aPFC0780w_2	1.03753	1.03753	0.990708	1.00195	0.931006	1.02573	0.98392	1.02556	1.04885	0.97959
atRNA_RNAPhe_0	atRNA_RNAPhe_0	0.923404	0.923404	0.664112	0.900243	0.724232	0.887634	1.07055	0.745864	1.09092	1.06257
aPFL0335c_1	aPFL0335c_1	0.981883	0.981883	1.01552	1.1134	1.03702	1.00472	1.07055	1.04864	1.1731	0.990722
aMAL8P1.66_0	aMAL8P1.66_0	1.01018	1.01018	0.997656	0.94677	1.18396	1.07177	1.02414	1.01541	1.06254	1.09394
aPF14_0584_0	aPF14_0584_0	1.04979	1.04979	0.998649	1.06146	0.924708	0.992709	1.02621	0.943407	1.09777	1.00894
aPF10_0328_1	aPF10_0328_1	1.00829	1.00829	1.05424	1.0896	1.09475	0.969693	0.999391	1.00156	1.03613	1.04233
aPFL2520w_3	aPFL2520w_3	0.970564	0.970564	1.00461	0.997625	1.04856	1.01673	1.02002	1.09849	0.935351	1.00084
aPF07_0046_1	aPF07_0046_1	0.979053	0.979053	0.969861	1.04091	1.08635	0.966691	1.01383	0.952638	0.950027	0.986674
aMAL8P1.100_0	aMAL8P1.100_0	1.09601	1.09601	1.04034	0.994379	1.14618	0.983703	1.13759	0.960946	1.05961	1.03727
aPF14_0692_1	aPF14_0692_1	1.17618	1.17618	1.11479	0.967329	1.27738	1.31594	1.118	1.26557	1.11146	1.15061
aPFL0350c_2	aPFL0350c_2	0.986599	0.986599	0.960927	1.1015	0.891121	1.00672	0.996297	0.89356	1.01265	0.948219
aMAL7P1.162_0	aMAL7P1.162_0	1.03282	1.03282	1.03141	1.08635	0.914212	0.930665	1.05302	0.995101	1.25137	0.933039
aPFI0870w_1	aPFI0870w_1	0.986599	0.986599	0.979788	1.07769	0.848087	0.967691	1.0128	0.956331	0.964703	0.883452
aPFB0550w_0	aPFB0550w_0	1.02904	1.02904	1.02644	1.09284	1.0748	0.96569	1.01486	0.9711	1.04102	1.05751
aPF14_0166_0	aPF14_0166_0	1.03187	1.03187	1.06715	0.956508	1.06431	0.944675	0.937509	1.00341	0.978401	0.987686
aPFD1140w_0	aPFD1140w_0	0.972451	0.972451	1.16344	0.972739	1.0874	1.05275	0.89316	1.17695	1.04493	1.08281
aPF11_0335_0	aPF11_0335_0	1.00263	1.00263	1.00758	1.06904	0.964593	0.946676	0.971544	1.00433	0.996012	0.999829
aPF11_0465_1	aPF11_0465_1	1.05923	1.05923	0.972839	1.01602	1.06011	1.01272	1.05612	1.09849	0.959811	1.09698
aMAL13P1.230_1	aMAL13P1.230_1	0.97811	0.97811	1.02148	1.00412	0.875376	0.908649	0.985983	0.852943	0.937308	0.98971
aPFD1130w_1	aPFD1130w_1	0.945097	0.945097	1.0185	1.14262	1.09684	0.893639	0.994234	0	1.03319	1.03626
aPF14_0303_1	aPF14_0303_1	0.957359	0.957359	0.957949	1.02251	0.753621	0.862616	0.956073	0.864944	0.916762	0.856129
aPF14_0722_1	aPF14_0722_1	0.950757	0.950757	1.03935	1.01927	0.751522	0.800572	0.984952	0.853867	0.916762	0.898632
aPF11_0345_0	aPF11_0345_0	0.976223	0.976223	1.06417	0.954344	1.00658	1.00872	1.04168	0.956331	0.976444	0.987686
aPF14_0626_2	aPF14_0626_2	0.931892	0.931892	0.960927	1.13721	0.754671	0.829593	1.03755	0.847405	0.944157	0.954291
aPFL1210w_2	aPFL1210w_2	0.915858	0.915858	0.947029	0.953262	0.9478	0.968692	0.955042	0.943407	1.0058	0.998817
aMAL7P1.228_1	aMAL7P1.228_1	0.969621	0.969621	0.938095	0.947852	0.913162	0.954682	0.972575	0.876021	0.877626	0.975542
aPF14_0041_0	aPF14_0041_0	1.10261	1.10261	1.03439	0.965165	1.19131	1.09478	1.04271	1.16772	1.02928	0.991734
aPFB0315w_1	aPFB0315w_1	1.01207	1.01207	1.04034	0.938114	1.02442	1.03874	0.992171	1.07633	0.926546	1.04942
aPF14_0693_0	aPF14_0693_0	1.06866	1.06866	1.03042	0.939196	1.23644	1.14682	1.08912	1.19449	1.10266	1.10305
aPF14_0063_0	aPF14_0063_0	0.920574	0.920574	0.946036	0.776893	1.04751	1.09578	0.946791	1.0671	0.81403	1.06966
aPFF1130c_0	aPFF1130c_0	0.991315	0.991315	0.948022	1.03766	0.902666	0.903646	1.06437	0.922176	0.993077	0.995781
aPFF0370w_1	aPFF0370w_1	0.971507	0.971507	0.982766	1.0474	0.918411	0.900643	0.998359	0.885252	0.905999	0.904704
aPFL2285c_0	aPFL2285c_0	0.943211	0.943211	1.07012	1.10366	0.969842	1.00272	0.957105	0.980331	0.98525	0.97959
aMAL8P1.23_3	aMAL8P1.23_3	0.963018	0.963018	1.03339	1.00953	0.933105	0.915654	0.917913	1.09849	0.984271	0.883452
aPFC0835c_0	aPFC0835c_0	0.991315	0.991315	0.917248	1.17941	0.847037	0.831594	1.02311	0.86679	0.988185	0.992746
aPFF0670w_6	aPFF0670w_6	0.960189	0.960189	0.938095	0.905653	0.831293	1.02473	0.951948	0.888021	0.949049	0.899644
aPFL1575w_0	aPFL1575w_0	0.995088	0.995088	1.01453	1.0171	1.08005	0.9797	1.07468	0.950792	1.06841	1.06257
aMAL8P1.130_1	aMAL8P1.130_1	1.01867	1.01867	0.971846	1.05822	0.831293	0.90965	1.02621	0.87879	0.98525	0.946195
aMAL13P1.298_0	aMAL13P1.298_0	0.904539	0.904539	0.944051	1.14153	0.856483	0.88163	1.01177	0.883406	0.945135	0.942147
aPFD0692c_0	aPFD0692c_0	0.742307	0.742307	0.799118	1.14045	0.750473	0.859614	0.932352	0.720017	1.00971	0.828806
aPFL2460w_0	aPFL2460w_0	1.02055	1.02055	1.02049	1.02576	1.079	0.910651	1.02105	1.02187	1.03515	0.991734
aPFL0745c_1	aPFL0745c_1	1.03848	1.03848	1.03637	1.00736	1.00553	1.03174	0.967419	1.05603	1.04885	0.976554
aPF14_0051_2	aPF14_0051_2	0.92529	0.92529	1.04332	1.01061	1.00658	0.978699	0.965356	0.937869	1.19854	1.02614
aPF11_0144_0	aPF11_0144_0	0.915858	0.915858	0.907321	1.04307	0.938353	0.880629	0.90038	0.907406	0.937308	0.939111
aPF13_0101_0	aPF13_0101_0	0.940381	0.940381	1.00659	1.07769	0.939403	0.939671	0.902443	0.886175	1.02145	1.06662
aPF13_0170_1	aPF13_0170_1	1.03282	1.03282	0.999642	1.00628	1.05066	1.04074	1.02827	1.01264	0.927524	0.986674
aPFE0570w_2	aPFE0570w_2	1.07337	1.07337	1.10685	0.783385	1.47366	1.44603	0.902443	1.34772	0.981336	1.13847
aPF14_0409_0	aPF14_0409_0	1.00924	1.00924	1.14458	0.975985	1.2123	1.10579	1.01486	1.11049	1.04298	1.01197
aPFD0965w_2	aPFD0965w_2	1.0413	1.0413	1.0602	0.83965	1.05906	1.10579	0.964324	1.01818	0.88741	0.91786
aPFL0355c_0	aPFL0355c_0	0.982826	0.982826	0.963905	1.00845	1.05276	1.08077	1.0097	0.988639	1.02928	0.97453
aPFC0940c_0	aPFC0940c_0	0.92529	0.92529	0.97681	1.04956	0.815549	0.875626	1.06849	0.856636	0	0.914824
aMAL8P1.152_1	aMAL8P1.152_1	0.99886	0.99886	1.04431	0.955426	1.04751	1.06776	0.967419	1.04495	1.10755	0.978578
aPFA0220w_1	aPFA0220w_1	0.984712	0.984712	1.11182	1.01277	0.951998	0.885633	0.998359	0.921253	0.892302	0.970482
aPF07_0005_0	aPF07_0005_0	1.19788	1.19788	1.18825	0.94136	1.06746	1.20986	1.06746	1.24803	1.10853	1.16073
aPF14_0549_1	aPF14_0549_1	0.877186	0.877186	0.91427	1.14694	0.851235	0.859614	0.984952	0.827097	1.00188	0.841962
aPFL0135w_1	aPFL0135w_1	0.915858	0.915858	0.975817	1.12855	0.86593	0.884632	0.990108	0.952638	1.05374	0.923931
aPFD0540c_0	aPFD0540c_0	1.06583	1.06583	1.05325	0.940278	1.17452	1.06776	0.99114	1.0791	1.02145	1.08281
aMAL13P1.326_0	aMAL13P1.326_0	0.900766	0.900766	0.892431	1.05822	0.878525	0.905647	0.910694	0.814173	0.939265	0.945183
aPFB0145c_2	aPFB0145c_2	1.01301	1.01301	0.986737	1.03225	1.10839	0.925661	0.981858	1.08187	0.987207	1.04638
aPF08_0142_2	aPF08_0142_2	0.968678	0.968678	0.963905	1.00736	1.03912	0.964689	0.830247	1.0071	0.899151	1.01096
aPFC0425w_5	aPFC0425w_5	1.01395	1.01395	1.05424	1.06146	0.917361	0.917656	1.00558	0.952638	0.974487	0.936075
aPFD0865c_1	aPFD0865c_1	1.03282	1.03282	0.996664	0.887259	1.09684	1.1258	0.979795	1.14187	0.996012	1.03525
aPFE1060c_2	aPFE1060c_2	0.963962	0.963962	1.02545	0.918638	1.06221	1.07777	1.07777	1.12895	1.10559	0.96947
aPF10_0391_0	aPF10_0391_0	1.06394	1.06394	1.0324	0.920802	0.955147	0	0.958136	0.936022	0.941222	1.01906
aPF11_0326_4	aPF11_0326_4	0.968678	0.968678	1.02049	0.884013	0.97404	0.9797	1.02002	0.960023	0.91187	1.01906
aMAL13P1.1_0	aMAL13P1.1_0	1.0215	1.0215	1.15152	0.848306	1.04961	0	1.05612	1.13449	0.940243	1.01197
aPFE0295w_0	aPFE0295w_0	1.12808	1.12808	1.06615	0.698987	1.33196	1.18685	1.07468	1.25911	0.840446	1.11621
aPF14_0487_1	aPF14_0487_1	0.974337	0.974337	0.952985	0.988969	1.01497	0.953681	0.973607	1.05418	0.956876	0.96441
aMAL13P1.224_0	aMAL13P1.224_0	0.976223	0.976223	1.14855	0.888341	1.27108	1.13981	0.962262	1.10126	1.29736	1.1071
aPF10_0341_0	aPF10_0341_0	1.04696	1.04696	1.19123	0.986805	1.03072	0.883631	0.963293	1.03849	0.972531	0.960362
achr12tRNAPro1_0	achr12tRNAPro1_0	1.07809	1.07809	1.05424	0.890505	1.05696	1.02974	1.00455	1.07079	0.946114	1.02614
bDd2var_90	bDd2var_90	0.97811	0.97811	1.00858	0.854798	1.03702	1.14582	0.984952	1.03572	0.906978	1.07269
aPF11_0374_0	aPF11_0374_0	0.913971	0.913971	0.879526	1.10583	0.870128	0.922659	0.947823	0.867713	0.986228	0.972506
aMAL7P1.16_1	aMAL7P1.16_1	0.964905	0.964905	1.0999	1.03225	1.05591	0.96569	1.00867	1.06249	1.11342	1.12025
aPFL1035w_1	aPFL1035w_1	0.918687	0.918687	0.962912	1.16534	0.833392	0.870622	0.908631	0.840943	0.974487	0.895596
aMAL7P1.89_7	aMAL7P1.89_7	1.11016	1.11016	1.00957	0.954344	1.13883	0.972695	0.993203	1.15849	1.00188	1.04334
aPF11_0357_0	aPF11_0357_0	0.973394	0.973394	0.990708	1.28436	0.835491	0.897641	0.924101	0.867713	1.05178	0.913812
aPFL1455w_0	aPFL1455w_0	0.999804	0.999804	1.03141	1.02792	0.907914	1.01072	0.948854	1.05695	0.984271	1.00489
aPFB0500c_0	aPFB0500c_0	0.936608	0.936608	1.00361	0.982477	0.902666	0.887634	0.977732	0.82525	0.852187	0.949231
aMAL13P1.26_5	aMAL13P1.26_5	1.10827	1.10827	1.00461	0.939196	0.929956	1.01172	1.07571	1.02464	1.04102	0.946195
aMALP1.29a_0	aMALP1.29a_0	1.04036	1.04036	0.977803	0.781221	1.2102	1.13381	0.994234	1.15941	0.946114	1.06864
aPFL0380c_0	aPFL0380c_0	0.977167	0.977167	0.975817	0.85588	1.14198	1.16583	1.01383	1.2868	1.06841	1.04638
aPFA0480w_0	aPFA0480w_0	1.04979	1.04979	1.00758	0.905653	1.10104	1.1128	0.963293	1.19818	0.998947	0.999829
aPF11_0142_0	aPF11_0142_0	0.946984	0.946984	1.03042	1.02576	1.03282	1.01673	0.947823	1.02649	1.09581	1.04233
aMAL13P1.298_2	aMAL13P1.298_2	0.904539	0.904539	0.886475	0.937032	0.959345	0.975697	0.98392	0.940638	0.935351	0.980602
aPFL0775w_0	aPFL0775w_0	0.997917	0.997917	0.97681	1.00412	1.0727	0.939671	1.06746	1.01818	1.01754	1.05954
aPFB0905c_0	aPFB0905c_0	1.05923	1.05923	0.919234	1.05714	0.89322	1.10579	0.973607	1.00341	1.08994	0.972506
aPFD0660w_0	aPFD0660w_0	0.930949	0.930949	1.00361	1.13504	0.912113	0.884632	1.02621	0.840943	0.993077	0.944171
aPF10_0350_1	aPF10_0350_1	1.12902	1.12902	1.0592	0.896997	0.990834	0.988706	0.952979	0.999716	0.930459	1.01804
aPF10_0058_1	aPF10_0058_1	1.08847	1.08847	1.10785	0.912145	1.29312	1.22387	1.13759	1.22311	1.00384	1.2255
aMAL8P1.126_1	aMAL8P1.126_1	1.09224	1.09224	1.00659	0.868864	1.0832	1.00972	0.980826	1.04403	0.836533	1.02209
aPFE0570w_14	aPFE0570w_14	1.05545	1.05545				0	0.950917	1.06249	1.1281	0.885476
aPF13_0214_1	aPF13_0214_1	1.17524	1.17524	1.223	0.869947	1.60486	1.5461	0.992171	1.48804	1.1731	1.17389
aPF11_0240_2	aPF11_0240_2	0.949813	0.949813	0.985744	1.13288	1.05171	0.86762	0.984952	0.950792	1.02341	1.03424
aPFC0120w_0	aPFC0120w_0	0.987542	0.987542	0.900373	0.921884	0.814499	0.929664	0.957105	0.943407	0.965682	0.928991
aMAL13P1.351_2	aMAL13P1.351_2	1.05828	1.05828	1.13366	0.747678	1.17766	1.17784	1.09324	1.07264	0.871755	0.955303
aPFL0390c_1	aPFL0390c_1	1.0149	1.0149	0.962912	0.92513	1.16822	1.20286	1.05818	1.09203	1.0009	1.02715
aMAL13P1.132_0	aMAL13P1.132_0	1.05923	1.05923	1.12373	1.14803	0.862781	0.910651	0.829216	0.89356	1.0508	0.808566
aPF14_0394_0	aPF14_0394_0	0.962075	0.962075	0.946036	1.17941	0.883773	0.906648	1.0458	0.859405	1.12907	0.896608
aPFE0440w_2	aPFE0440w_2	0.915858	0.915858	0.91427	1.03766	0.813449	0.856612	0.913788	0.963715	0.996991	0.933039
aPFA0220w_0	aPFA0220w_0	1.02338	1.02338	1.01751	1.01602	1.02862	1.00972	0.908631	0.928638	1.05961	0.970482
aPF11_0395_5	aPF11_0395_5	1.00735	1.00735	1.01155	0.964082	1.15667	1.14482	1.00248	1.11972	1.04102	1.04739
aPFI0335w_0	aPFI0335w_0	0.849833	0.849833	0.870592	1.05389	0.863831	0.889636	0.929258	0.82802	0.938287	1.00084
aPF11_0353_0	aPF11_0353_0	1.10167	1.10167	1.01255	0.727119	1.27738	1.35297	0.972575	1.40773	1.02243	1.00489
aPFE1630w_0	aPFE1630w_0	1.12053	1.12053	1.15748	0.917555	1.11679	1.15783	1.16028	1.12157	0.939265	1.09192
bDd2rif_86	bDd2rif_86	0.981883	0.981883	0.983759	0.894833	0.933105	1.03974	0.999391	0.912945	0.849252	0.995781
aPF14_0221_0	aPF14_0221_0	1.03093	1.03093		1.03441	1.0706	1.03974	0.926164	1.11972	1.15647	0.886488
aPF10_0308_1	aPF10_0308_1	1.02338	1.02338	1.02942	0.959754	0.949899	0.952681	1.13656	0.931407	0.900129	0.95935
aPFF0715c_0	aPFF0715c_0	0.963018	0.963018	1.05325	1.05281	1.0895	1.06376	0.972575	1.20372	1.09679	1.04334
aPFD0665c_0	aPFD0665c_0	0.920574	0.920574	0.908314	0.920802	1.12413	1.02974	0.956073	0.982177	0.949049	1.07269
aPF13_0097_1	aPF13_0097_1	1.06583	1.06583	1.04531	0.865618	1.28158	1.22988	1.07055	1.30249	1.09385	1.04436
bDd2var_58	bDd2var_58	1.06206	1.06206	1.0731	0.996543	0.966693	0.896641	1.06334	0.978485	0.951006	1.04436
aPF14_0491_1	aPF14_0491_1	0.972451	0.972451	0.964898	1.05714	0.903716	0.987706	1.02827	0.975716	0.974487	0.987686
aPF14_0095_0	aPF14_0095_0	1.0281	1.0281	0.960927	0.900243	1.0727	1.07377	1.10046	1.04495	0.996012	1.06561
aPF14_0538_2	aPF14_0538_2	1.0281	1.0281	1.1823	0.835322	1.28577	1.17284	0.993203	1.32926	1.06744	0.97453
aPF10_0090_0	aPF10_0090_0	1.10922	1.10922	1.27958			1.14282	1.10046	1.09203	1.12125	1.03626
aPFL0635c_1	aPFL0635c_1	1.15449	1.15449	1.087	0.708725	1.2081	1.18485	1.06643	1.13449	0.858058	1.07775
aPF10_0364_0	aPF10_0364_0	0.968678	0.968678	0.868606	0.921884	0.877476	0.969693	0.936478	0.99787	0.989163	0.794399
bDd2var_5	bDd2var_5	1.03376	1.03376	1.04431	0.969493	0.907914	0.918656	1.04993	1.01633	0.929481	1.02918
aMAL13P1.193_1	aMAL13P1.193_1	1.02527	1.02527	1.08501	0.968411	1.079	1.05676	0.933383	1.16126	1.09385	1.00185
aPFB0655c_1	aPFB0655c_1	0.932836	0.932836	1.00957	0.945688	0.948849	0.968692	0.937509	0.953561	1.01949	1.01602
aPF13_0071_1	aPF13_0071_1	0.968678	0.968678	0.950007	0.882931	1.0895	1.1168	1.05096	1.08741	1.01754	1.11621
aPF08_0036_1	aPF08_0036_1	1.05262	1.05262	0.932139	0.95759	1.24169	1.15883	0.950917	1.12157	1.0009	1.02412
aPF10_0181_1	aPF10_0181_1	1.06583	1.06583	1.01354	0.999789	1.08845	1.02773	0.898317	1.04403	1.08603	1.05346
aORF78_0	aORF78_0	0.990372	0.990372	0.78522	0.660034	0.959345	1.20886	0.967419	1.08833	1.07722	1.05043
aPF10_0177_3	aPF10_0177_3	1.06771	1.06771	1.04133	0.979231	0.954097	1.00572	0.929258	1.00802	0.987207	1.02007
bDd2var_21	bDd2var_21	1.04602	1.04602	1.05523	0.835322	0.984536	1.01573	0.969481	1.08095	0.957855	1.02715
aMAL7P1.55_3	aMAL7P1.55_3	1.26862	1.26862	1.35006	1.03009	1.17766	1.05075	1.17472	1.16126	1.17115	1.15365
aPF14_0711_1	aPF14_0711_1	1.00924	1.00924	0.959934	1.03766	0.884823	1.05575	0.99114	0.972946	1.01656	0.869285
aMAL13P1.296_3	aMAL13P1.296_3	0.8753	0.8753	0.990708	0.836404	1.01288	0.974696	1.07159	1.04587	0.928503	1.01096
aPF13_0252_1	aPF13_0252_1	0.935665	0.935665	0.958941	1.12963	0.840739	0.869621	0.924101	0.773557	0.923611	0.938099
aPFL1390w_1	aPFL1390w_1	1.0762	1.0762	1.03836	0.886177	1.09894	1.15783	0.94576	1.1308	1.03319	0.955303
aPFA0375c_1	aPFA0375c_1	1.11205	1.11205	1.17733	1.07878	0.962494	0.948678	1.05405	0.960023	1.00384	1.0312
aPFI1500w_4	aPFI1500w_4	0.967735	0.967735	0.964898	1.04307	0.905815	0.974696	0.960199	0.953561	1.07526	0.954291
aPFC0950c_1	aPFC0950c_1	1.05545	1.05545	1.08005	0.929458	1.13148	1.1148	1.06746	1.07079	0.956876	1.10406
aPFI0260c_5	aPFI0260c_5	1.04696	1.04696	1.25774	1.05173	0.985586	0.834596	1.01383	0.924022	0.994055	0.976554
aPFB0880w_0	aPFB0880w_0	1.01961	1.01961	1.04928	0.938114	1.05486	1.10479	0.919976	1.06526	1.02047	0.96441
aPFI0295c_2	aPFI0295c_2	0.969621	0.969621	0.992693	1.09393	0.927857	0.920658	0.974638	0.876944	0.944157	0.978578
aPFF0835w_0	aPFF0835w_0	0.974337	0.974337	0.872577	1.06579	0.883773	0.819586	1.1149	0.85202	0.920675	0.967446
aPFC1016w_0	aPFC1016w_0	1.0564	1.0564	1.28256	1.06038	1.32986	1.03374	1.14688	1.12341	1.32084	1.16478
aPF14_0614_2	aPF14_0614_2	0.862095	0.862095	0.920226	1.00304	0.816598	0.859614	0.960199	0.860328	0.950027	0.928991
aPF10_0208_0	aPF10_0208_0	0.959246	0.959246	0.937102	1.12963	0.950948	0.90965	0.921007	0.91756	1.00188	0.934051
aPFL0050c_0	aPFL0050c_0	0.943211	0.943211	0.953978	1.25623	0.870128	0.824589	1.0128	0.799404	1.00775	0.97453
aPF13_0033_0	aPF13_0033_0	0.946984	0.946984	0.935117	0.929458	0.885873	0.950679	1.0293	0.956331	0.928503	0.89762
aPF14_0419_1	aPF14_0419_1	0.888505	0.888505	0.884489	0.988969	0.898468	0.810579	1.00352	0.853867	0.905999	0.975542
aPF11_0342_1	aPF11_0342_1	0.966791	0.966791	0.946036	1.029	0.92051	0.955683	0.978763	0.915714	0.967639	0.955303
aPFD0945c_1	aPFD0945c_1	1.00829	1.00829	0.998649	1.02359	1.13358	1.14582	0.99114	1.09664	1.1007	1.01197
aPF11_0079_2	aPF11_0079_2	0.900766	0.900766	0.972839	1.01818	1.00133	1.00472	1.1015	0.987716	0.981336	0.950243
aPF14_0417_0	aPF14_0417_0	0.913971	0.913971	0.982766	1.0474	0.955147	0.935669	0.978763	0.888021	0.986228	0.992746
aPFD0430c_0	aPFD0430c_0	0.924347	0.924347	0.985744	1.18049	0.882724	0.852609	0.99114	0.844636	0.956876	0.990722
aPF08_0022_0	aPF08_0022_0	1.01867	1.01867	0.971846	0.955426	0.982437	1.00672	1.05199	0.999716	0.962747	1.02614
aPF13_0187_0	aPF13_0187_0	0.983769	0.983769	0.881511	0.93595	0.925758	0.953681	1.02827	0.927714	0.894258	0.998817
aPFE0325w_1	aPFE0325w_1	0.936608	0.936608	0.964898	0.918638	1.04017	0.876626	0.990108	1.02372	0.972531	1.00084
aPFE0110w_0	aPFE0110w_0	0.949813	0.949813	0.960927	0.947852	0.932055	1.1168	1.02414	0.999716	1.00188	0.934051
aMAL7P1.147_2	aMAL7P1.147_2	1.0215	1.0215	1.0592	0.894833	1.17766	1.10079	1.02414	1.07356	0.972531	1.04233
aPF11_0201_3	aPF11_0201_3	1.06017	1.06017	1.0185	0.882931	1.20076	1.05876	0.964324	1.05141	0.905999	1.04638
aPFC0370w_1	aPFC0370w_1	0.861152	0.861152	0.970854	1.20429	0.938353	0.874625	0.907599	0.930484	1.01656	0.957326
aMAL13P1.35_0	aMAL13P1.35_0	1.00169	1.00169	0.96589	0.980313	0.978238	1.03374	0.994234	0.984947	0.976444	1.01602
atRNA_RNAAla_0	atRNA_RNAAla_0	0.945097	0.945097	0.859672	0.938114	0.781961	0.850608	0.951948	0.82525	1.04102	1.00995
aPFF0575c_0	aPFF0575c_0	1.04508	1.04508	1.08204	1.03658	0.91946	0.988706	1.00352	0.970177	1.08505	0.994769
aPF14_0646_0	aPF14_0646_0	1.01584	1.01584	0.907321	0.960836	0.993983	1.09178	1.01796	0.977562	0.982315	1.03019
aPFB0755w_1	aPFB0755w_1	1.13468	1.13468	1.13763	0.938114	1.19236	1.09578	1.13759	1.15572	1.06352	1.08585
aMAL8P1.16_0	aMAL8P1.16_0	0.9517	0.9517	0.994678	1.04091	0.886922	0.883631	1.03755	0.935099	1.09483	0.987686
aPF14_0698_0	aPF14_0698_0	1.00358	1.00358	1.02744	0.969493	0.976139	1.1148	1.01692	1.08556	1.12907	0.972506
aPF13_0155_2	aPF13_0155_2	1.05545	1.05545	1.05325	1.02143	1.06851	1.1168	1.08499	1.06987	1.02634	1.06358
aPF07_0111_1	aPF07_0111_1	1.08375	1.08375	1.02148	0.974903	1.10314	1.01973	1.04786	1.03849	0.996991	1.07573
aPFL0150w_1	aPFL0150w_1	0.987542	0.987542	1.02247	0.982477	0.980338	1.02773	1.00352	0.986793	1.01362	1.08787
aPFB0265c_2	aPFB0265c_2	1.02244	1.02244	1.01453	1.19239	1.12938	0.924661	0.967419	0.955407	1.01069	1.06156
aPF07_0033_0	aPF07_0033_0	0.992258	0.992258	1.01155	1.00628	0.992933	0.950679	0.959168	0.930484	1.01069	0.954291
aPF14_0760_0	aPF14_0760_0	0.938495	0.938495	0.906329	1.13829	0.876426	0.826591	0.975669	0.824327	1.04885	0.983638
aPFE0410w_0	aPFE0410w_0	0.939438	0.939438	0.981773	1.12422	0.862781	0.835597	1.05715	0.860328	0.997969	0.966434
aPF11_0060_0	aPF11_0060_0	0.919631	0.919631	0.967876	1.09284	0.986635	1.02073	1.0819	0.968331	0.919697	1.02007
aPFB0450w_0	aPFB0450w_0	0.996031	0.996031	0.975817	1.22052	0.899517	0.887634	0.975669	0.903714	1.02536	0.986674
aPF07_0042_4	aPF07_0042_4	1.04225	1.04225	1.0056	0.978149	0.992933	1.00072	1.05199	0.955407	0.948071	0.98465
aPF14_0268_0	aPF14_0268_0	1.14506	1.14506	1.11479	0.879685	1.34455	1.29693	1.05302	1.36065	0	1.10305
aMAL7P1.123_0	aMAL7P1.123_0	1.08752	1.08752	1.03836	0.886177	1.18606	1.1208	1.07881	1.17234	1.14082	1.16883
aPF14_0204_1	aPF14_0204_1	1.01678	1.01678	0.983759	0.881849	1.09475	1.09578	0.989077	1.01633	1.01167	1.05852
aMAL7P1.171_0	aMAL7P1.171_0	1.02244	1.02244	1.01354	1.07228	1.06011	0.957684	1.07262	1.07079	1.08015	1.12936
aPFI1465w_0	aPFI1465w_0	0.905483	0.905483	0.998649	1.00953	1.16402	1.06576	0.94576	1.07079	1.02439	1.03525
aPFL1025c_0	aPFL1025c_0	0.984712	0.984712	0.977803	0.880767	1.04751	1.01272	0.962262	1.08003	1.0009	1.0312
aPF14_0708_1	aPF14_0708_1	1.0413	1.0413	0.982766	0.92513	1.11889	1.13781	0.963293	1.14649	0.987207	1.0059
aPFL1920c_0	aPFL1920c_0	1.04979	1.04979	1.09792	0.997625	1.16612	1.1138	1.02311	1.08556	1.03319	1.11519
aPF13_0260_0	aPF13_0260_0	0.89888	0.89888	0.916256	1.14153	0.950948	0.824589	0.988046	0.845559	1.03808	0.986674
aPFF0915w_0	aPFF0915w_0	0.880016	0.880016	0.962912	1.10366	0.967742	0.888635	0.957105	1.00156	1.01167	0.936075
aPFE1345c_1	aPFE1345c_1	1.01018	1.01018	1.00758	1.08311	0.957246	0.884632	1.0128	0.958177	1.01167	1.00894
aMAL13P1.380_5	aMAL13P1.380_5	1.09884	1.09884	1.08402	0.986805	0.900567	0.986705	1.00352	0.990485	0.890345	0.920895
aPF14_0542_0	aPF14_0542_0	1.03187	1.03187		0.818009	1.14618	1.08077	1.0097	1.16587	0.952963	0.999829
aMAL13P1.119_1	aMAL13P1.119_1	0.9517	0.9517	1.02644	1.07445	1.24379	0.997713	1.03549	1.12987	1.06646	1.10406
aPF11_0097_0	aPF11_0097_0	1.07715	1.07715	0.995671	0.889423	0.985586	1.08678	0.977732	1.03664	0.951984	1.00084
aPFI1160w_1	aPFI1160w_1	1.01395	1.01395	1.05523	1.04632	0.977189	0.963689	0.979795	0.92033	0.963725	0.994769
aPFC0105w_0	aPFC0105w_0	1.04508	1.04508	0.915263	0.983559	0.983486	1.03174	1.04786	0.977562	0.964703	0.994769
aPFL1155w_0	aPFL1155w_0	1.00169	1.00169	1.01155	0.956508	1.10524	1.03974	0.936478	1.09018	1.04004	0.925955
aPF14_0366_1	aPF14_0366_1	1.01207	1.01207	1.01056	0.790959	1.14513	1.38899	1.05405	1.25911	1.15451	1.06055
aMAL13P1.125_0	aMAL13P1.125_0	0.97811	0.97811	1.04034	1.05605	1.06431	0.930665	0.973607	0.991408	0.954919	1.05852
aMAL13P1.308_2	aMAL13P1.308_2	1.00546	1.00546	1.02049	1.19455	0.883773	0.850608	0.990108	0.880636	1.04493	0.98971
aPFF1240w_0	aPFF1240w_0	0.985655	0.985655	0.972839	1.03982	1.14828	1.09879	1.07468	1.05049	1.17604	1.06561
aPF11_0443_0	aPF11_0443_0	0.985655	0.985655	1.0195	0.966247	1.10944	1.00772	1.06952	0.989562	1.06548	1.07472
aPFD1045w_0	aPFD1045w_0	0.963018	0.963018	0.895409	1.2216	0.9457	0.891637	0.947823	0.945253	1.01265	1.01703
aPF07_0101_2	aPF07_0101_2	1.05451	1.05451	1.01552	1.06363	0.938353	1.00472	0.972575	0.957254	0.979379	1.03424
aPF14_0170_3	aPF14_0170_3	0.932836	0.932836	0.982766	0.983559	0.913162	0.884632	1.06024	0.872329	0.876647	0.972506
aPFF1365c_5	aPFF1365c_5	1.04602	1.04602	1.07012	0.964082	0.954097	0.887634	1.10975	0.936945	0.890345	1.02412
aPF14_0318_0	aPF14_0318_0	0.942268	0.942268	0.919234	1.10583	0.885873	0.888635	0.990108	0.883406	1.06254	0.97959
aPFI0565w_1	aPFI0565w_1	1.02904	1.02904	1.03141	0.970575	1.0811	1.08377	0.901411	1.10495	1.15745	0.908752
aPFL1985c_1	aPFL1985c_1	1.00075	1.00075	1.02347	1.14262	0.879575	0.910651	1.04271	0.908329	0.968617	0.953279
aPFC0110w_0	aPFC0110w_0	1.00263	1.00263	0.996664	1.02143	0.999231	0.933667	1.07777	0.984024	0.983293	1.01096
aPFC0095c_0	aPFC0095c_0	0.987542	0.987542	1.09097	0.988969	0.950948	1.04475	0.99114	1.11326	1.19267	1.07067
aPF10_0312_0	aPF10_0312_0	1.09601	1.09601	1.23392	0.960836	1.28158	1.2549	1.06024	1.32742	1.17897	1.08686
aPFE1330c_1	aPFE1330c_1	1.16015	1.16015	1.10983	1.13396	1.04541	0.917656	1.05921	1.02279	1.10559	0.96947
aPFF1340w_1	aPFF1340w_1	1.15355	1.15355	0.917248		1.41698	1.45304	1.03136	1.33757	0.96666	1.20627
aPFF0095c_2	aPFF0095c_2	0.946984	0.946984	0.910299	1.15668	0.853335	0.927663	1.0128	0.857559	1.0009	0.910776
aMAL13P1.66_3	aMAL13P1.66_3	0.950757	0.950757	1.01056	1.14911	1.03702	0.908649	0.992171	0.887098	1.03808	0.982626
aPF10_0232_0	aPF10_0232_0	0.916801	0.916801	0.950007	1.0712	0.860682	0.78356	1.09531	0.855713	0.902086	0.927979
aPFC0720w_1	aPFC0720w_1	0.9517	0.9517	0.971846	1.14045	0.896369	0.933667	0.955042	0.889867	0.986228	0.993757
aMAL8P1.26_0	aMAL8P1.26_0	0.823423	0.823423	0.831877	1.08311	0.833392	0.770551	0.913788	0.791096	0.93633	0.973518
aPF13_0187_1	aPF13_0187_1	1.05451	1.05451	1.03339	0.931622	1.19131	1.1138	0.971544	1.20464	1.14473	0.97959
aPF11_0172_0	aPF11_0172_0	0.973394	0.973394	0.927175	1.15127	0.852285	0.799571	0.965356	0.773557	0.890345	0.957326
ac11rRNA18s_1	ac11rRNA18s_1	1.18939	1.18939	1.12373	0.940278	1.28682	1.2569	1.03652	1.29326	1.09483	0.971494
aPF07_0085_1	aPF07_0085_1	1.12714	1.12714	1.07707	0.838568	1.45266	1.43703	1.08499	1.43911	1.09581	1.26497
ac7rRNAITS2_0	ac7rRNAITS2_0	1.10733	1.10733	1.09295	0.86129	1.23539	1.07977	1.11697	1.25265	1.0146	1.12127
aPFL1110c_0	aPFL1110c_0	0.982826	0.982826	0.971846	1.01494	1.0706	1.05676	0.995265	1.06341	1.04591	1.0818
aPFD0320c_5	aPFD0320c_5	0.961132	0.961132	1.03637	1.36118	0.749423	0.770551	0.970513	0.739402	1.07233	0.879405
aPF11_0091_1	aPF11_0091_1	0.906426	0.906426	1.02049	1.09284	1.08005	1.00972	1.07365	0.912945	1.15451	0.976554
aPF13_0118_1	aPF13_0118_1	0.871527	0.871527	0.908314	1.02792	0.847037	0.89564	0.955042	0.837251	0.945135	0.934051
aPFC0755c_2	aPFC0755c_2	1.09695	1.09695	1.1009	0.979231	1.15667	1.17784	1.03136	1.17049	1.14082	1.04233
aPFL1950w_0	aPFL1950w_0	1.0347	1.0347	1.00063	1.02359	0.922609	0.963689	0	0.998793	0.860014	0.808566
aPF10_0078_1	aPF10_0078_1	0.927176	0.927176	0.921219	1.07337	0.745224	0.822588	0.955042	0.773557	0.851209	0.874345
aPF14_0275_0	aPF14_0275_0	1.15355	1.15355	1.08303	0.859126	1.12833	1.20086	1.05715	1.27572	1.05667	0.996793
aMAL7P1.146_1	aMAL7P1.146_1	0.952643	0.952643	0.966883	1.20213	0.832342	0.785561	1.15719	0.845559	0.922632	0.988698
aPF07_0120_3	aPF07_0120_3	0.976223	0.976223	1.02545	1.0712	0.916311	0.933667	1.04786	0.977562	1.01852	0.988698
bHB3vsa_229	bHB3vsa_229	1.26768	1.26768		1.09284	1.09999	0.96569	0	1.00156	1.04982	0.98971
aMAL13P1.356_1	aMAL13P1.356_1	1.29031	1.29031	1.01453			0	0	0.937869	0	1.29229
aMAL7P1.115_0	aMAL7P1.115_0	0.893221	0.893221	1.02644	1.09501	0.868029	0.871623	1.00455	0.874175	0.956876	0.941135
aPF11_0226_1	aPF11_0226_1	0.992258	0.992258	1.03141	1.02468	0.988734	0.960686	0.966387	0.919407	1.00971	1.00894
aPF10_0056_0	aPF10_0056_0	1.01772	1.01772	0.932139	1.16967	0.849136	0.826591	0.993203	0.859405	1.06352	0.886488
aPFB0335c_0	aPFB0335c_0	1.09601	1.09601	1.02148	0.874275	1.04856	1.03774	1.12625	1.12895	0.931438	1.05954
aPFI0905w_0	aPFI0905w_0	1.04319	1.04319	1.02744	1.00953	0.897418	1.04074	0.974638	1.01172	1.07233	0.914824
aPF14_0501_1	aPF14_0501_1	0.861152	0.861152	0.907321	1.02468	0.793507	0.950679	0.977732	0.830789	0.968617	0.88244
aPF13_0024_0	aPF13_0024_0	0.950757	0.950757	0.985744	1.06796	1.01812	1.04375	0.963293	1.0671	1.14669	0.939111
aPF14_0200_1	aPF14_0200_1	1.0347	1.0347	1.05623	0.896997	1.04226	0.972695	0.94576	0.984024	0.88741	0.976554
bDd2var_107	bDd2var_107	0.99886	0.99886	0.927175	0.983559	0.982437	0.914653	1.02827	0.933253	0.884474	1.02614
aMAL7P1.145_1	aMAL7P1.145_1	1.06017	1.06017	1.09792	1.02359	1.01497	1.03574	0.996297	0.986793	0.898172	0.956314
aPFL1890c_1	aPFL1890c_1	1.00075	1.00075	0.933131	0.986805	0.992933	1.03974	1.08396	0.977562	1.00482	1.01501
aPF11_0205_0	aPF11_0205_0	0.993201	0.993201	1.02148	1.02576	0.923659	0.926662	0.909662	0.906483	0.955898	0.931015
aPF10_0079_1	aPF10_0079_1	1.09318	1.09318	1.03439	0.782303	1.11259	1.19085	0.868408	1.08464	0.953941	0.971494
aPF11_0237_0	aPF11_0237_0	0.884732	0.884732	1.04233	1.22269	0.962494	0.96569	0.969481	1.04587	1.18387	0.985662
aMAL13P1.188_1	aMAL13P1.188_1	1.07903	1.07903	1.09494	0.917555	1.14828	1.10379	1.0623	1.18895	1.0009	0.946195
aPF07_0018_0	aPF07_0018_0	0.979053	0.979053	1.02347	1.12639	1.12308	1.02573	1.05096	1.06895	1.06548	1.12531
aPF11_0129_0	aPF11_0129_0	0.944154	0.944154	0.944051	0.999789	0.992933	1.00372	0.937509	0.94433	1.08505	1.01299
aPF14_0709_0	aPF14_0709_0	0.961132	0.961132	0.902358	1.00304	0.915262	1.00972	0.927195	0.913868	1.05667	0.993757
aPF10_0381_0	aPF10_0381_0	1.12525	1.12525	1.01056	0.904571	1.04961	1.1258	1.17163	1.15018	0.976444	1.01197
aPFL2535w_1	aPFL2535w_1	1.0413	1.0413	1.03836	0.972739	0.983486	0.948678	0.951948	0.922176	0.901107	1.02209
aPFL2240w_0	aPFL2240w_0	1.00169	1.00169	1.01552	1.05497	0.895319	0.96569	0.962262	0.948946	1.06059	0.89256
aPF14_0615_0	aPF14_0615_0	1.11676	1.11676	0.988722	0.858044	1.24274	1.30994	1.02724	1.1631	1.00286	1.08585
aPFF0920c_2	aPFF0920c_2	0.950757	0.950757	0.938095	1.11881	0.899517	0.884632	0.980826	0.937869	1.04395	0.881428
aMAL13P1.203_0	aMAL13P1.203_0	1.05734	1.05734	1.14458	1.08094	1.12413	1.05075	1.05921	1.1548	1.07135	0.985662
aPF14_0284_1	aPF14_0284_1	1.12525	1.12525	1.01652	0.860208	1.09999	1.13381	0.914819	1.20372	0.873712	1.06257
aPFI1430w_1	aPFI1430w_1	1.12525	1.12525	0.983759	0.922966	1.0832	1.18685	1.06849	1.19911	1.06646	1.09394
aPF14_0712_4	aPF14_0712_4	0.952643	0.952643	1.03439	1.13071	0.801904	1.00472	1.00867	0.986793	1.02047	0.949231
aPF11_0439_1	aPF11_0439_1	0.984712	0.984712	0.949014	1.04848	0.847037	0.871623	0.981858	0.840943	0.943179	0.926967
bDd2var_25	bDd2var_25	1.07337	1.07337	1.04332	1.12422	1.13253	0.990708	1.00661	1.0828	1.12712	1.00185
aPF07_0081_1	aPF07_0081_1	1.00735	1.00735	1.03141	1.1015	1.02232	0.986705	0.992171	0.956331	0.944157	1.0646
aPF14_0682_0	aPF14_0682_0	0.953586	0.953586	0.924197	0.975985	0.993983	0.880629	0.974638	0.911099	0.945135	0.967446
aPF13_0106_1	aPF13_0106_1	0.97528	0.97528	0.942066	1.07012	0.89217	0.884632	0.963293	0.929561	0.963725	1.0059
aPF10_0025_0	aPF10_0025_0	0.999804	0.999804	0.963905	1.0712	1.00028	0.936669	0.976701	0.965562	1.06352	1.03828
aPF11_0481_1	aPF11_0481_1	0.941325	0.941325	0.887468	0.995461	0.954097	0.988706	0.990108	0.89356	1.0146	0.927979
aPFL1520w_0	aPFL1520w_0	0.979996	0.979996	1.00163	1.11773	0.97299	0.970694	0.962262	0.980331	1.06939	0.978578
aPFF0800w_1	aPFF0800w_1	1.06394	1.06394	1.15053	1.02035	1.31097	1.19786	1.0128	1.23049	1.10168	1.07674
aPF11_0507_4	aPF11_0507_4	1.18373	1.18373	1.09295	0.852634	0.983486	1.24089	1.14481	1.09941	1.04395	0.909764
aPFI0755c_0	aPFI0755c_0	0.958302	0.958302	0.942066	1.08852	0.849136	0.88163	0.940603	0.864944	1.01949	0.937087
aPF14_0177_1	aPF14_0177_1	1.08847	1.08847	1.08104	0.86129	1.24694	1.18985	0.992171	1.25172	1.05961	1.16782
bDd2var_62	bDd2var_62	1.03753	1.03753	0.988722	0.966247	0.928907	0.891637	1.08293	0.946176	0.938287	1.05144
aPF14_0648_2	aPF14_0648_2	1.08375	1.08375	1.03836	0.892669	1.04436	1.18985	1.05096	1.1511	1.04102	0.946195
aPFD0165w_1	aPFD0165w_1	0.976223	0.976223	0.96589	1.08527	1.0727	0.978699	1.06024	0.984024	1.03613	1.03424
aPFC0865w_0	aPFC0865w_0	1.07715	1.07715	1.02545	0.864536	0.997131	1.03874	0.944729	0.956331	0.941222	0.943159
aPFF1140c_1	aPFF1140c_1	0.968678	0.968678	0.969861	1.0474	0.908964	1.01072	0.934415	0.948946	0.958833	0.983638
aPFE0440w_0	aPFE0440w_0	0.996974	0.996974	0.973832	1.02143	0.9457	0.953681	0.919976	0.907406	0.886431	0.998817
bDd2var_151	bDd2var_151	1.07054	1.07054	1.0731	1.01927	1.04751	0.985704	0.96123	0.990485	0.956876	1.04436
aMAL13P1.380_11	aMAL13P1.380_11	0.910199	0.910199	0.930153	1.0593	0.817648	0.823588	0.951948	0.852943	0.954919	0.89762
bDd2var_142	bDd2var_142	1.05074	1.05074	1.01552	1.07769	1.18711	1.02974	1.03858	1.11233	1.12907	1.10204
aPF14_0588_2	aPF14_0588_2	0.966791	0.966791	0.921219	1.08202	0.850186	0.885633	0.949885	0.874175	0.89328	0.836902
aMAL13P1.93_1	aMAL13P1.93_1	1.02055	1.02055	0.997656	0.975985	1.15562	1.10679	0.958136	1.08556	1.04395	1.04436
aPF14_0632_1	aPF14_0632_1	1.09224	1.09224	1.12571	0.999789	1.20181	1.1218	1.03549	1.22495	1.18093	1.10912
aPF14_0738_0	aPF14_0738_0	0.834742	0.834742	0.875555	1.01386	0.83759	0.813581	1.01074	0.818789	0.845338	0.953279
aPF10_0260_1	aPF10_0260_1			1.05821	1.04632	1.21965	1.06576	1.0623	1.15757	1.08407	0
aPF13_0254_3	aPF13_0254_3	0.905483	0.905483	0.944051	0.964082	0.917361	1.00672	0.884909	0.942484	0.997969	0.878393
bDd2rif_28	bDd2rif_28	0.99886	0.99886	0.995671	0.903489	1.00553	0.959686	1.0097	0.993255	0.932416	1.07472
aMAL7P1.131_0	aMAL7P1.131_0	0.939438	0.939438	0.955963	1.09284	0.843888	0.873624	0.951948	0.869559	0.950027	0.947207
aPFL0365c_0	aPFL0365c_0	1.0413	1.0413	1.0185	0.971657	1.0727	1.15282	1.24073	1.19264	1.13201	0.952267
aPF14_0392_2	aPF14_0392_2	0.945097	0.945097	0.919234	0.963	1.06641	1.01272	0.956073	1.02372	1.01362	1.01703
aPF10_0388_0	aPF10_0388_0	1.07432	1.07432	1.1545	0.95759	1.2081	1.10979	1.02621	1.31634	1.18093	1.06257
aORF470_1	aORF470_1	0.831912	0.831912	0.699849	0.782303	0.771465	0.852609	0.911725	0.809558	0.956876	0.998817
aPFF0330w_0	aPFF0330w_0	1.01961	1.01961	1.05424	1.08743	1.04541	0.890636	1.02621	0.977562	0.984271	1.05346
bDd2ste_19	bDd2ste_19	1.15638	1.15638	1.0195	1.00953	1.00763	1.01973	1.05715	1.02002	0.951984	1.08382
aPFD1060w_0	aPFD1060w_0	1.0696	1.0696	0.952985	0.959754	1.03072	1.16383	0.932352	1.06803	0.996991	1.0484
aPFL2080c_0	aPFL2080c_0	1.03942	1.03942	0.998649	0.902407	1.02442	0.992709	1.02208	1.00525	0.987207	1.05448
aPF11_0214_1	aPF11_0214_1	0.863038	0.863038	0.890446	1.03441	0.853335	0.861616	0.933383	0.871405	0.899151	0.880417
aPF13_0255_1	aPF13_0255_1	0.811161	0.811161	0.839818	1.19672	0.720034	0.837598	0.913788	0.722787	1.01656	0.876369
aMAL8P1.85_0	aMAL8P1.85_0	0.935665	0.935665	0.949014	0.891587	0.948849	0.946676	0.996297	0.924945	0.924589	0.995781
aPFA0700c_0	aPFA0700c_0	1.08281	1.08281	0.966883	1.0593	0.977189	0.977699	1.0458	0.951715	1.06646	1.09192
aPFB0260w_0	aPFB0260w_0	0.997917	0.997917	1.00758	1.04956	0.951998	0.970694	0.985983	1.00618	1.05374	0.994769
aPFE1325w_1	aPFE1325w_1	1.0413	1.0413	0.92519	0.956508	0.967742	0.939671	0.996297	0.995101	0.860014	0.998817
aPFA0555c_0	aPFA0555c_0	1.02338	1.02338	1.09395	1.09068	1.15877	1.10179	1.05096	1.01726	1.09972	1.0565
aMAL7P1.178_1	aMAL7P1.178_1	0.968678	0.968678	0.998649	1.09393	0.912113	0.886633	1.00455	0.968331	0.982315	0.981614
aPF14_0086_0	aPF14_0086_0	0.918687	0.918687	0.843789	1.11665	0.797705	0.846605	0.992171	0.833558	0.915783	0.944171
aPF11_0438_0	aPF11_0438_0	1.07903	1.07903	1.01056	0.884013	1.04122	1.06376	1.03961	1.03018	1.06548	1.0565
aPF13_0210_2	aPF13_0210_2	0.902653	0.902653	0.913278	1.14045	0.884823	0.802573	0.948854	0.819712	0.932416	0.904704
aPFI1480w_1	aPFI1480w_1	0.994144	0.994144	0.992693	1.02143	0.992933	0.975697	0.885941	0.937869	0.951984	0.987686
aPF14_0385_1	aPF14_0385_1	1.09224	1.09224	1.13763	1.05064	1.19446	1.18184	1.07571	1.11049	1.20343	1.16377
aPF07_0113_1	aPF07_0113_1	0.861152	0.861152	0.934124	0.978149	0.907914	0.929664	1.00455	0.935099	0.894258	0.911788
aPFA0110w_0	aPFA0110w_0	0.932836	0.932836	0.845774	1.12422	0.850186	0.765547	1.04683	0.798481	0.91187	0.946195
aMAL13P1.310_0	aMAL13P1.310_0	0.980939	0.980939	0.971846	0.924048	0.959345	1.01272	0.974638	1.07449	1.01949	0.944171
aPFD0115c_0	aPFD0115c_0	1.05168	1.05168	0.97681	1.07661	0.887972	0.966691	1.04374	0.933253	0.996991	1.00388
aPF14_0572_0	aPF14_0572_0	0.962075	0.962075	0.935117	1.01386	0.931006	0.940672	1.01177	0.907406	1.01167	1.01096
aPF11_0154_0	aPF11_0154_0	0.893221	0.893221	0.937102	1.05281	0.927857	0.884632	0.956073	0.93233	0.976444	0.98971
aPF11_0134_1	aPF11_0134_1	0.891334	0.891334	1.05126	1.0355	0.992933	1.05876	0.955042	1.00618	1.08407	0.899644
aun4tRNAThr1_0	aun4tRNAThr1_0	1.02999	1.02999	1.03836	1.09176	0.9457	0.886633	1.06746	0.938792	0.974487	1.01501
aPF14_0430_0	aPF14_0430_0	1.09412	1.09412	1.01453	0.877521	1.14513	1.09678	1.04786	1.02372	0.953941	1.2255
aPFL0945w_0	aPFL0945w_0	0.999804	0.999804	0.956956	0.999789	0.971941	0.938671	0.996297	0.975716	0.932416	1.05448
aPF11_0085_0	aPF11_0085_0	1.02999	1.02999	1.02942	0.971657	0.83864	0.914653	0.957105	0.875098	0.884474	0.881428
aPF14_0605_0	aPF14_0605_0	0.880959	0.880959	0.969861	0.865618	0.964593	1.13981	0.971544	1.13541	0.940243	0.965422
aPFA0125c_2	aPFA0125c_2	1.16392	1.16392	1.12174	0.832076	1.27528	1.399	1.05921	1.25265	1.06939	1.06156
aPF14_0084_3	aPF14_0084_3	0.996031	0.996031	1.00758	0.922966	0.907914	0.874625	1.30261	0.876021	0.889366	0.829818
aPF14_0387_1	aPF14_0387_1	0.92812	0.92812	0.970854	1.15668	0.851235	0.902645	0.992171	0.829866	1.0146	0.916848
aPFA0210c_0	aPFA0210c_0			0.942066	1.08635	0.926807	0.948678	0.94576	0.939715	1.04004	1.01096
bDd2rif_78	bDd2rif_78	0.994144	0.994144	0.973832	0.95759	1.03912	0.950679	0.960199	0.999716	0.934373	1.01602
aPFE1173c_0	aPFE1173c_0	0.904539	0.904539	0.910299	1.00736	0.848087	0.885633	0.955042	0.900022	0.914805	1.00793
aMAL7P1.212_0	aMAL7P1.212_0	1.11582	1.11582	1.10983			0	0	1.10495	0	1.37021
aPFE1070c_0	aPFE1070c_0	0.780979	0.780979	1.1823	0.860208	1.33301	1.01172	0.884909	1.16587	0.779786	1.10305
aPFD0330w_1	aPFD0330w_1	1.01961	1.01961	0.977803	0.896997	1.11364	1.12681	0.980826	1.02372	0.969595	1.17996
aPFD0855c_0	aPFD0855c_0	1.04508	1.04508	1.05722	1.10042	1.04436	1.01973	0.966387	1.05972	1.07037	1.07269
aPF13_0313_0	aPF13_0313_0	0.985655	0.985655	1.01056	1.1253	0.884823	0.870622	1.01589	0.914791	1.09287	0.944171
bDd2rif_81	bDd2rif_81	1.08186	1.08186	0.951	1.07986	1.13568	1.02573	1.0654	0.941561	1.00384	1.01703
aMAL13P1.310_3	aMAL13P1.310_3	0.996031	0.996031	0.977803	1.16534	0.926807	1.07677	0.976701	1.06987	1.05276	1.08281
aPFB0180w_1	aPFB0180w_1	0.927176	0.927176	0.978795	1.05714	0.868029	0.903646	0.916882	0.859405	0.876647	0.849045
aPFE1430c_0	aPFE1430c_0	0.999804	0.999804	0.989715	0.980313	1.03282	1.01372	0.946791	1.00895	0.978401	1.02007
aMAL13P1.122_2	aMAL13P1.122_2	0.993201	0.993201	1.04531	1.1015	0.936254	1.04775	0.987014	0.951715	0.963725	0.949231
aPF13_0237_0	aPF13_0237_0	0.99886	0.99886	1.04431	0.896997	1.18291	1.14382	1.05405	1.14187	1.00286	0.980602
aPF13_0076_0	aPF13_0076_0	1.04319	1.04319	1.01255	0.939196	1.03282	1.01873	0.978763	1.0311	1.06646	1.04537
aPFE1095w_0	aPFE1095w_0	1.05168	1.05168	0.998649	1.03225	1.06955	1.04074	1.01796	0	1.00482	1.13948
aPF14_0525_0	aPF14_0525_0	0.927176	0.927176	0.902358	1.06255	0.927857	0.865618	1.02002	0.889867	0.943179	0.947207
aPF11_0477_0	aPF11_0477_0	1.01018	1.01018	0.980781	0.942442	1.10524	1.13581	1.15306	1.14649	1.07624	1.06763
bHB3vsa_76	bHB3vsa_76	1.10544	1.10544	1.1009	0.959754	1.14513	0.821587	0	1.26188	1.02439	1.07269
aPFB0405w_0	aPFB0405w_0	0.982826	0.982826	0.992693	0.969493	0.903716	0.959686	1.01074	1.04403	0	0.968458
aPF13_0326_0	aPF13_0326_0	1.15449	1.15449	1.12075	0.987887	1.0937	1.399	1.24692	1.37449	1.29051	1.01096
aPFL2395c_0	aPFL2395c_0	0.947927	0.947927	1.04233	1.08311	0.943601	0.880629	0.990108	0.873252	0.99112	1.00793
aPF10_0159_0	aPF10_0159_0	1.08469	1.08469	1.09494	1.13721	1.05171	1.02974	1.10872	0.980331	0.951006	1.02614
aPF14_0626_7	aPF14_0626_7	1.12242	1.12242	1.10685	0.827748	1.09789	1.20186	1.13553	1.08095	0.951006	1.0059
aPF13_0234_0	aPF13_0234_0	1.01301	1.01301	0.950007	0.999789	0.960395	0.994711	1.00042	0.953561	0	1.05144
aPF00_0003_3	aPF00_0003_3	1.10356	1.10356	1.16542	0.933786	1.25114	1.17084	1.03652	1.14095	1.13103	1.12936
aPF14_0604_0	aPF14_0604_0	0.919631	0.919631	0.960927	0.851552	1.09894	1.14482	1.08809	1.07541	1.03026	1.04436
aPF11_0305_1	aPF11_0305_1	1.07337	1.07337	1.18726	0.980313	1.06536	1.15382	0	1.18895	1.08994	1.1324
aPFE0765w_3	aPFE0765w_3	1.03659	1.03659	1.02942	0.802861	1.16927	1.11179	1.02517	1.02464	0.948071	1.04739
aPF14_0174_1	aPF14_0174_1	1.08658	1.08658	1.04531	1.01061	0.925758	0.962688	1.03652	0.948946	1.00188	0.977566
aPF14_0073_3	aPF14_0073_3	0.971507	0.971507	1.03736	1.0896	1.05696	0.943674	1.07984	1.10864	1.10951	1.05751
aPFE1635w_0	aPFE1635w_0	1.06583	1.06583	1.06913	1.08852	0.956197	0.932666	0.963293	0.939715	0.876647	1.03322
aPF14_0609_1	aPF14_0609_1	1.13657	1.13657		0.551832	1.31201	1.30793	0	1.24341	0.769023	1.11519
aMAL13P1.145_2	aMAL13P1.145_2	0.960189	0.960189	1.02942	1.04091	0.894269	0.978699	0.935446	0.962792	0.943179	0.880417
aPFC0425w_2	aPFC0425w_2	0.937552	0.937552	0.904343	1.01386	0.935204	0.875626	0.996297	0.915714	0.915783	1.06156
aPFL1620w_7	aPFL1620w_7	1.08658	1.08658	1.11976	0.981395	1.0937	1.13881	0.973607	1.10772	0.976444	1.01703
aPFF1105c_1	aPFF1105c_1	0.941325	0.941325	0.975817	1.06471	0.915262	0.896641	1.04477	0.817866	0.900129	0.945183
aMAL13P1.38_1	aMAL13P1.38_1	0.956416	0.956416	0.916256	0.994379	0.970891	1.02773	0.981858	0.952638	0.947092	0.943159
aPFF0860c_0	aPFF0860c_0	0.92246	0.92246	0.906329	0.939196	0.959345	0.953681	0.970513	0.909253	0.951984	1.01501
aPF13_0098_0	aPF13_0098_0	0.996031	0.996031	0.879526	0.832076	0.995032	1.02073	0.855	0.993255	0.962747	0.963398
aMAL13P1.485_1	aMAL13P1.485_1	1.05451	1.05451	1.02545	0.901325	1.04856	1.03974	1.00661	1.03387	0.905999	1.06561
aMAL8P1.335_1	aMAL8P1.335_1	1.21014	1.21014	1.24384	1.04307	0.991883	0.904646	1.04374	1.02002	0.937308	1.02614
aPFC0055w_0	aPFC0055w_0	1.03659	1.03659	0.93611	0.849388	1.0937	0.994711	1.05405	1.0791	0.93633	1.07573
aPFE0430w_2	aPFE0430w_2	1.03282	1.03282	1.00063	0.947852	0.903716	0.968692	0.996297	0.984947	0.947092	0.983638
aPF14_0112_2	aPF14_0112_2	0.902653	0.902653	0.902358	1.23242	0.827094	0.826591	0.891098	0.81602	0.961768	0.937087
aPF13_0269_0	aPF13_0269_0	0.930006	0.930006	1.04928	1.11016	0.960395	0.911651	1.04065	0.967408	1.06352	1.00287
aMAL13P1.314_0	aMAL13P1.314_0	0.949813	0.949813	0.945044	1.10799	0.821846	0.827591	1.0489	0.844636	0.993077	0.948219
aPFB1030w_0	aPFB1030w_0	1.1809	1.1809	1.16244	0.881849	0.999231	1.17884	1.15203	1.14464	0.954919	1.02513
aMAL8P1.18_1	aMAL8P1.18_1	0.968678	0.968678	0.891438	1.07337	0.750473	0.874625	0.89316	0.880636	0.943179	0.875357
aPFL1205c_0	aPFL1205c_0	0.930949	0.930949	1.00858	1.00412	1.02022	0.903646	1.01692	0.987716	0.93633	1.04537
aPF11_0289_1	aPF11_0289_1	0.963962	0.963962	0.969861	1.09501	0.901617	0.917656	0.99114	0.939715	0.981336	0.928991
aPFL1330c_1	aPFL1330c_1	1.06771	1.06771	1.03141	1.06796	1.05906	0.956684	1.03343	1.00802	0.970574	1.06864
aPFF0225w_2	aPFF0225w_2	0.879073	0.879073	0.994678	1.1556	0.948849	0.872623	0.919976	0.907406	0.962747	0.981614
aPFL2350c_0	aPFL2350c_0	0.943211	0.943211	0.997656	1.01277	0.996082	0.956684	0.995265	0.968331	1.0058	0.978578
aMAL8P1.34_0	aMAL8P1.34_0	1.01678	1.01678	1.0324	1.15019	0.990834	0.985704	1.10046	1.07449	1.03711	1.01906
aPFF1400w_2	aPFF1400w_2	1.12148	1.12148	1.13663	1.0474	1.09055	0.980701	0.903474	1.04864	1.13397	0.998817
aPF10_0001_3	aPF10_0001_3	1.06771	1.06771	1.02545	1.03982	1.21965	1.08978	1.02517	1.06987	1.03319	1.07674
aPF11_0471_0	aPF11_0471_0	0.985655	0.985655	0.995671	1.13721	0.891121	0.95168	0.976701	0.883406	1.06548	0.961374
aMAL13P1.123_0	aMAL13P1.123_0	0.840401	0.840401	0.837833	0.911063	0.850186	0.827591	0.80962	0.886175	0.858058	0.899644
bDd2var_24	bDd2var_24	0.970564	0.970564	1.04133	0.877521	1.03597	1.01072	0.943697	1.06249	0.89328	1.0646
aPFL0370w_0	aPFL0370w_0	0.936608	0.936608	0.943058	0.912145	0.989784	1.16583	0.941634	1.17418	1.13984	0.928991
aPFD0380c_1	aPFD0380c_1	1.01867	1.01867	0.962912	0.973821	0.91946	0.976698	1.00558	1.03295	0.958833	0.926967
aPFE1045c_1	aPFE1045c_1	0.887562	0.887562	0.96589	1.0171	0.955147	0.940672	0.931321	0.931407	0.871755	0.909764
aPFI1070c_1	aPFI1070c_1	0.84889	0.84889	0.887468	1.10366	0.765167	0.762545	0.908631	0.781865	0.909913	0.869285
aPFD0940w_0	aPFD0940w_0	0.863981	0.863981	0.930153	1.03874	0.89322	0.893639	0.984952	0.876021	1.00971	0.935063
aPFA0270c_0	aPFA0270c_0	0.985655	0.985655	1.05027	1.04091	0.913162	0.924661	1.1149	0.99787	0.984271	0.982626
aPF14_0416_1	aPF14_0416_1	0.996031	0.996031	1.07707	0.863454	1.17032	1.16884	0.969481	1.16772	0.987207	1.03019
aPFL0420w_1	aPFL0420w_1	1.00075	1.00075	0.952985	1.18265	0.956197	1.03774	0.960199	1.00525	1.18289	0.875357
aPF13_0135_1	aPF13_0135_1	1.05828	1.05828	1.05623	0.963	1.00343	1.06876	0.999391	0.991408	1.05178	0.975542
aPFI0260c_3	aPFI0260c_3	0.894164	0.894164	0.890446	1.06904	0.870128	0.834596	1.00455	0.957254	0.921654	0.940123
aPF07_0126_1	aPF07_0126_1	0.97811	0.97811	1.03538	1.00628	1.02232	1.00372	0.905537	1.0311	1.00384	1.00084
bDd2ste_11	bDd2ste_11	1.06583	1.06583	1.02843	1.03117	0.998181	0.874625	1.09531	0.916637	0.961768	1.03221
aPF11_0213_3	aPF11_0213_3	0.999804	0.999804	0.997656	1.01494	0.86488	0.956684	1.03549	0.950792	1.02439	0.940123
aPFL0465c_0	aPFL0465c_0	0.954529	0.954529	0.951	1.07228	0.968792	0.942674	0.988046	0.945253	0.972531	1.02007
aPFE0860c_1	aPFE0860c_1	1.14317	1.14317	1.15549	1.10583	0.931006	1.00972	1.03652	1.02279	1.06059	0.987686
aPF07_0055_1	aPF07_0055_1	0.961132	0.961132	0.929161	0.915391	0.943601	1.00872	0.907599	0.904637	0.975466	0.91786
aPFB0920w_0	aPFB0920w_0	1.02433	1.02433	0.963905	1.18265	0.993983	0.994711	1.10975	1.02556	1.08211	0.973518
aPFL2425w_0	aPFL2425w_0	1.01772	1.01772	1.00063	1.09825	0.885873	0.830593	1.02414	0.882483	0.990142	0.988698
aPFF0120w_0	aPFF0120w_0	1.00924	1.00924	0.880519	1.03874	0.908964	0.900643	0.928227	0.906483	0.995034	1.00388
aPFE1045c_0	aPFE1045c_0	0.992258	0.992258	1.05027	0.867782	1.18186	1.00972	1.01692	1.23695	1.05178	1.01299
aPFF0770c_1	aPFF0770c_1	0.954529	0.954529	0.961919	0.953262	0.938353	0.88163	1.02724	0.906483	0.915783	0.990722
aPFF0385c_0	aPFF0385c_0	0.973394	0.973394	0.921219	0.956508	0.955147	0.899643	0	0.883406	0.861971	1.04233
aPFC0640w_0	aPFC0640w_0	0.956416	0.956416	1.05027	1.10042	1.02127	0.974696	1.03652	0.979408	1.08211	0.995781
bDd2var_144	bDd2var_144	1.07243	1.07243	0.955963	0.954344	0.959345	1.17484	0.996297	1.04679	1.09972	0.952267
aPFL1335w_1	aPFL1335w_1	1.08092	1.08092	1.04928	0.939196	1.25534	1.07277	1.07159	1.12895	0.96079	1.1668
aPFB0370c_0	aPFB0370c_0	1.08658	1.08658	1.11976	0.922966	1.19026	1.1188	1.00764	1.15664	1.01265	1.1749
aMAL8P1.105_0	aMAL8P1.105_0	0.926233	0.926233	0.935117	1.27246	0.964593	0.963689	1.14481	0.994178	1.14082	1.08281
aPFA0350c_0	aPFA0350c_0	0.957359	0.957359	1.1813	0.878603	1.30047	1.39099	1.09324	1.48711	1.21811	1.12025
aPFD0975w_1	aPFD0975w_1	1.01207	1.01207	0.964898	1.00628	0.897418	0.93767	1.01692	0.979408	0.882518	0.965422
aPFL1425w_0	aPFL1425w_0	1.01584	1.01584	1.08601	1.03117	1.05066	1.01873	0.990108	1.04679	1.01656	1.04132
aPF10_0286_0	aPF10_0286_0	1.00358	1.00358	0.990708	0.992215	1.02232	1.03774	1.0097	1.04956	1.0508	0.97959
aPF14_0650_0	aPF14_0650_0	0.97811	0.97811	0.929161	0.837486	1.0937	1.28792	0.795181	1.2868	1.00971	0.884464
aPFA0620c_1	aPFA0620c_1	1.01772	1.01772	1.09792	1.17075	1.00448	0.889636	0.947823	0.88156	0.903064	0.915836
aPF14_0217_0	aPF14_0217_0	1.08092	1.08092	1.07012	0.982477	1.19866	1.05575	0.985983	1.10957	1.02536	1.05954
aPFI0260c_0	aPFI0260c_0	1.0149	1.0149			0.969842	0	0.954011	0.960946	1.04102	1.06662
aPF11_0127_0	aPF11_0127_0	0.920574	0.920574	0.929161	0.944606	1.01812	0.991709	0.935446	1.00064	0.974487	1.0565
aPFI0690c_1	aPFI0690c_1	0.974337	0.974337	1.08799	1.15993	0.916311	0.874625	0.942666	0.93233	1.04298	0.985662
aPF08_0018_0	aPF08_0018_0	0.945097	0.945097	0.921219	0.981395	0.989784	0.960686	0.944729	0.994178	0.950027	1.0393
aPFL0415w_0	aPFL0415w_0	1.02716	1.02716	1.0185	0.881849	1.19971	1.13081	1.17369	1.17603	1.09777	1.03828
aPF11_0395_6	aPF11_0395_6	0.990372	0.990372	0.980781	0.992215	1.02127	1.04275	0.998359	1.01264	0.965682	1.03019
aMAL13P1.170_0	aMAL13P1.170_0	0.94887	0.94887	0.998649	1.07986	0.876426	0.872623	1.03136	0.88156	0.982315	0.939111
aPFD1060w_4	aPFD1060w_4	1.00452	1.00452	0.997656	1.13721	0.797705	0.929664	1.04168	0.948946	0.992099	0.920895
aMAL7P1.167_0	aMAL7P1.167_0	0.944154	0.944154	0.947029	1.02792	0.933105	0.913653	1.0489	1.00895	1.05667	0.944171
aPFC0600w_0	aPFC0600w_0	0.912085	0.912085	0.953978	1.08311	0.903716	0.883631	0.930289	0.879713	0.920675	0.926967
aPFI1055w_0	aPFI1055w_0	0.931892	0.931892	1.00262	1.05064	1.14828	0.914653	1.00145	1.06895	1.12907	1.09394
aPFD0735c_1	aPFD0735c_1	0.92529	0.92529	0.968868	1.04415	0.794556	0.924661	1.01074	0.860328	0.946114	0.855117
aPFD0255w_1	aPFD0255w_1	1.14223	1.14223	1.06715	0.93054	1.06536	1.14382	1.08499	1.14187	1.00286	1.02412
aPFL2405c_4	aPFL2405c_4	0.912085	0.912085	0.895409	1.18373	0.81135	0.871623	0.972575	0.82525	1.0009	0.867261
aPFF0365c_1	aPFF0365c_1	1.03093	1.03093	1.08005	1.02468	0.993983	0.970694	1.06849	0.960946	0.947092	1.00691
aPF10_0064_0	aPF10_0064_0	1.04602	1.04602	1.04133	0.867782	1.15982	1.25189	1.0128	1.24895	1.04493	1.08686
aPF14_0140_0	aPF14_0140_0	1.09601	1.09601	1.03141	0.838568	1.06221	0	0.975669	1.15664	0.947092	1.02412
aPF14_0450_1	aPF14_0450_1	1.03753	1.03753	0.978795	1.00195	0.959345	0.905647	0.908631	0.968331	1.00677	1.00995
aPFF0520w_1	aPFF0520w_1	1.04225	1.04225	0.971846	0.918638	1.2228	1.13681	1.07984	1.1068	0.914805	1.05852
aPF10_0104_0	aPF10_0104_0	0.97528	0.97528	0.977803	1.0712	1.03282	0.912652	0.914819	0.988639	1.00286	0.992746
aPF13_0088_0	aPF13_0088_0	1.03942	1.03942	0.98773	1.04091	0.960395	1.02273	1.09118	0.979408	0	1.05751
aPF13_0013_1	aPF13_0013_1	1.04979	1.04979	1.10288	0.907817	1.2249	1.07477	0.998359	1.06064	0.949049	1.10507
aPFD0980w_1	aPFD0980w_1	1.07903	1.07903	1.05325	0.843978	1.30677	0	1.15513	1.2628	1.04102	1.10609
aPF13_0188_0	aPF13_0188_0	1.09695	1.09695	1.00461	1.03982	1.12413	0.987706	1.00764	1.06156	1.09581	1.10305
bDd2rif_11	bDd2rif_11	1.03942	1.03942	0.884489	1.02143	0.936254	0.871623	1.00042	0.863098	0.83849	1.06662
aPF11_0507_3	aPF11_0507_3	1.14223	1.14223	1.11579	1.00736	1.05906	1.08978	1.05612	1.11418	1.04689	1.07775
aPF14_0564_1	aPF14_0564_1	1.01678	1.01678	0.94008	0.806107	0.961445	0	0.99114	0.991408	1.01069	1.25282
aMAL13P1.96_0	aMAL13P1.96_0	0.97811	0.97811	1.02744	0.969493	0.878525	0.873624	1.02724	0.910176	0.889366	0.991734
aPF07_0021_1	aPF07_0021_1	1.1111	1.1111	1.04332	0.898079	0.968792	1.05575	0.976701	0	0.931438	1.03424
aPFL1490w_0	aPFL1490w_0	0.945097	0.945097	1.00063	1.00304	1.10314	0.957684	0.972575	0.981254	0.969595	1.11823
aPFI1720w_0	aPFI1720w_0	0.82248	0.82248	0.79614	1.1675	0.793507	0.95168	1.0293	0.642477	1.02732	0.805531
aPF10_0106_0	aPF10_0106_0	1.00075	1.00075	1.15252	0.862372	1.01602	1.17384	1.0489	1.17603	0.99112	0.96947
aPF10_0266_0	aPF10_0266_0	1.04885	1.04885	1.07112	0.994379	0.970891	1.00472	1.08603	1.05049	1.04787	0.911788
aMAL13P1.21_0	aMAL13P1.21_0	1.08375	1.08375	1.15847	1.03333	1.10944	1.1258	1.08499	1.12803	1.09581	1.14353
aPF10_0363_1	aPF10_0363_1	0.931892	0.931892	0.951993	0.965165	0.796656	0.880629	1.01074	0.862174	0.830662	0.937087
aMAL13P1.121_0	aMAL13P1.121_0	1.00735	1.00735	1.07707	1.20754	1.01393	0.856612	1.00248	0.873252	1.01754	0.975542
aPFC0221c_0	aPFC0221c_0	1.14977	1.14977	1.06615	0.808271	1.26898	1.34396	1.08912	1.35696	1.10168	1.15567
aPF11_0108_1	aPF11_0108_1	1.06583	1.06583	1.0056	0.968411	0.979288	1.04375	0.941634	1.05787	0.944157	1.0565
aMAL13P1.246_2	aMAL13P1.246_2	1.01772	1.01772	0.92519	1.00304	0.902666	1.06476	0.941634	1.13264	1.02047	0.947207
aPF10_0079_5	aPF10_0079_5	1.07715	1.07715	0.9917	0.963	1.0895	1.10379	0.99114	1.04956	1.03319	1.07775
aMAL8P1.68_1	aMAL8P1.68_1	0.973394	0.973394	0.918241	0.867782	1.04961	1.10979	0.990108	1.00525	0.950027	1.07573
aPFE1350c_0	aPFE1350c_0	0.860208	0.860208	0.968868	1.10475	0.862781	0.837598	0.928227	0.868636	0.939265	0.89256
aPF08_0072_0	aPF08_0072_0	1.14411	1.14411	1.14358	0.884013	1.16927	1.42202	1.00867	1.33665	1.2592	1.014
aMAL7P1.207_1	aMAL7P1.207_1	1.05451	1.05451	0.968868	1.10799	0.982437	0.9797	0.947823	0.978485	0.943179	0.994769
aPFE1160w_0	aPFE1160w_0	0.905483	0.905483	0.881511	0.982477	0.851235	0.818585	0.849843	0.85202	0.895237	0.879405
aMAL7P1.89_1	aMAL7P1.89_1	1.01395	1.01395	1.06119	0.954344	1.02652	1.03874	1.01074	1.14649	1.1007	0.976554
aPF11_0115_0	aPF11_0115_0	1.0413	1.0413	1.05325	1.0355	0.955147	0.887634	0.995265	0.972946	1.13103	0.940123
aPFF0810c_0	aPFF0810c_0	0.996974	0.996974	0.948022	1.01818	0.959345	0.907649	0.980826	0.94433	0.974487	0.987686
aPF13_0254_5	aPF13_0254_5	1.03376	1.03376		0.977067	0.938353	1.07477	0.984952	0.984947	1.0283	1.07978
aPF11_0109_0	aPF11_0109_0	1.00829	1.00829	1.0185	1.11016	0.969842	0.992709	1.02311	0.951715	1.2142	1.04031
aPF10_0245_1	aPF10_0245_1			1.03339	1.01386	1.10104	1.01272	1.09324	1.08003	0.996012	1.06358
aPFE1410c_0	aPFE1410c_0	0.988485	0.988485	1.04233	1.14153	0.861731	0.912652	1.01899	0.903714	1.03515	0.937087
achr5tRNAArg1_0	achr5tRNAArg1_0	1.14694	1.14694	1.05126	0.853716	1.02862	0.999714	0.954011	0.9471	0.863928	1.04233
aPFI0330c_0	aPFI0330c_0	1.05734	1.05734	1.03637	0.909981	1.0916	1.26691	0.921007	1.13357	0.982315	0.889524
aPF08_0033_0	aPF08_0033_0	1.01584	1.01584	1.01155	1.04523	0.971941	0.971694	1.03136	1.01264	1.00482	1.03525
aPF13_0138_0	aPF13_0138_0	0.960189	0.960189	0.950007	0.735776	1.18921	1.13781	0.866345	1.18526	0.930459	1.00388
aPFL0765w_0	aPFL0765w_0	1.00829	1.00829	0.98773	1.12639	0.989784	0.989707	1.03136	0.949869	1.10755	1.01703
aMAL13P1.83_0	aMAL13P1.83_0			1.05523	1.16317	1.03912	0.89564	0	1.0311	0	0
aPF14_0539_0	aPF14_0539_0	1.01678	1.01678	0.98773	0.980313	0.982437	1.1168	1.00455	0.974793	0.977423	0.960362
aPFF0910c_1	aPFF0910c_1	0.956416	0.956416	0.958941	0.945688	1.03702	1.07377	0.906568	0.963715	1.04298	1.0231
aPFI1045w_0	aPFI1045w_0	1.11959	1.11959	1.13068	0.944606	1.12938	1.05275	1.1541	1.11972	1.03711	1.01096
aPFL1085w_1	aPFL1085w_1	1.06677	1.06677	1.05225	1.01602	1.06116	1.06276	0.979795	1.06249	1.07037	1.02007
aPFC0940c_1	aPFC0940c_1			1.51286			#N/A	#N/A	#N/A	#N/A	#N/A
aPFB0405w_2	aPFB0405w_2	1.02338	1.02338	1.02942	1.07769	0.993983	1.04174	1.03755	1.04218	1.04004	1.00691
aPFL1345c_0	aPFL1345c_0	1.02904	1.02904	0.995671	0.960836	1.02127	0.990708	0.958136	0.987716	0.930459	1.08888
aPF08_0063_0	aPF08_0063_0	0.953586	0.953586	1.03538	1.04199	0.9457	0.947677	1.07674	0.953561	0.997969	1.00793
aPF14_0319_3	aPF14_0319_3	0.970564	0.970564	0.926183	0.877521	0.916311	1.03574	1.02414	0.94433	0.882518	0.824758
aPF08_0135_0	aPF08_0135_0	1.0762	1.0762	1.10983	1.01927	1.16822	0.985704	0.994234	1.1391	1.00677	1.05245
aMAL8P1.131_0	aMAL8P1.131_0	0.966791	0.966791	0.992693	1.04848	0.951998	0.935669	1.00352	0.994178	0.940243	1.02209
aPFL0235w_0	aPFL0235w_0	0.982826	0.982826	1.19322	1.05064	1.06011	0.970694	0.976701	1.03295	1.12418	0.914824
aMAL7P1.108_0	aMAL7P1.108_0	1.18184	1.18184	1.17733	0.756334	1.36869	1.51208	0.973607	1.53511	1.03906	1.04031
aMAL7P1.321_0	aMAL7P1.321_0	1.20448	1.20448	1.17436	0.990051	0.981387	0.912652	1.1541	0.939715	0.920675	1.12127
aPF10_0122_0	aPF10_0122_0	1.13846	1.13846	0.992693	0.841814	1.18186	1.20886	0.965356	1.15295	0.938287	1.08382
aMAL13P1.107_2	aMAL13P1.107_2	1.01301	1.01301	0.954971	0.943524	1.01078	1.01473	1.02105	0.964638	0.996991	0.983638
aPF11_0287_0	aPF11_0287_0	1.0149	1.0149	0.945044	1.06471	0.992933	0.985704	0.994234	0.975716	1.0508	1.12531
aPFB0485c_1	aPFB0485c_1	0.923404	0.923404	0.918241	1.10583	0.922609	0.932666	0.963293	0.879713	1.00677	0.96947
aMAL13P1.155_0	aMAL13P1.155_0	0.989428	0.989428	1.11976	0.940278	1.00658	1.19185	1.05096	1.08926	1.09092	0.883452
aMAL13P1.167_0	aMAL13P1.167_0	1.06394	1.06394	1.00361	1.00304	0.9478	0.947677	1.01177	0.914791	0.951984	0.983638
aPF14_0585_0	aPF14_0585_0	1.07149	1.07149	1.23392	0.983559	1.25009	1.05876	0.974638	1.14003	1.06548	1.05043
aMAL8P1.113_6	aMAL8P1.113_6	1.07337	1.07337	1.06715	0.890505	1.41803	1.19085	1.08087	1.28865	0	1.14555
aPF10_0219_1	aPF10_0219_1	1.14129	1.14129	1.07112	0.7704	1.24484	1.30994	1.05405	1.34403	0.964703	1.05346
aPFI1495w_0	aPFI1495w_0	0.874357	0.874357	1.03935	1.07769	0.833392	1.00272	1.00455	0.960023	0.941222	0.911788
aPF14_0052_0	aPF14_0052_0	1.00263	1.00263	0.985744	0.955426	0.827094	0.953681	0.989077	0.892637	0.927524	0.909764
aPFF1445c_0	aPFF1445c_0	0.946984	0.946984	0.962912	1.08635	0.941502	0.957684	1.03652	0.90556	1.01069	0.990722
aPF14_0175_0	aPF14_0175_0	1.06394	1.06394	0.992693	1.18049	0.835491	0.920658	1.05818	0.908329	1.02634	0.903692
aPFE1325w_6	aPFE1325w_6	1.05168	1.05168	0.96589	1.03766	0.859632	0.974696	1.01177	0.923099	0.937308	0.862201
aPF14_0339_0	aPF14_0339_0	1.11393	1.11393	1.05722	0.872111	1.10839	1.22087	1.02002	1.21018	1.05863	1.0231
aMAL13P1.148_0	aMAL13P1.148_0	0.930949	0.930949	1.14656	1.11124	1.14513	1.05175	1.03549	1.07818	1.03808	1.06358
aPF10_0079_3	aPF10_0079_3	1.02716	1.02716	1.08303	1.19023	0.889021	0.890636	0.975669	0.888944	1.09385	0.971494
aPF14_0031_0	aPF14_0031_0	1.02244	1.02244	1.07608	1.07986	1.13568	0.9797	0.925133	1.05879	1.19071	1.01804
aMAL7P1.92_2	aMAL7P1.92_2	0.749853	0.749853	1.00957	1.12963	1.04122	0.871623	0.995265	0.9711	1.00971	1.06156
aPF11_0350_0	aPF11_0350_0	1.06111	1.06111	1.04531	1.0896	1.07165	1.04074	0.981858	1.07449	1.07135	1.00691
aPF07_0095_0	aPF07_0095_0	0.923404	0.923404	1.03736	1.21295	0.847037	0.832595	1.01177	0.847405	1.02536	0.978578
aPF13_0161_0	aPF13_0161_0	0.94887	0.94887	0.967876	0.984641	0.943601	1.16984	1.01589	1.13541	1.01558	0.896608
aPF14_0326_9	aPF14_0326_9	0.972451	0.972451	0.971846	1.11557	0.911063	0.949679	1.09428	0.924022	1.02047	0.916848
aPF07_0040_0	aPF07_0040_0	0.959246	0.959246	1.05325	1.16101	1.00658	0.885633	1.03136	0.963715	0.928503	1.06257
aPFC0510w_1	aPFC0510w_1	0.947927	0.947927	1.0592	1.17508	0.884823	0.871623	1.03549	0.896329	1.04885	0.970482
aPFL1665c_0	aPFL1665c_0	0.918687	0.918687	1.04034	1.12206	0.94675	0.928663	0.954011	0.992331	1.00188	0.988698
aMAL7P1.64_0	aMAL7P1.64_0	0.895107	0.895107	0.865628	1.24	0.922609	0.818585	0.894192	0.835405	0.98525	0.995781
aPF13_0170_0	aPF13_0170_0	1.09035	1.09035	1.08898	0.950016	1.09894	1.16283	1.07055	1.1391	1.01069	0.992746
aPF11_0168_3	aPF11_0168_3	1.07526	1.07526	1.03637	1.03874	1.00133	1.05175	0.965356	0.99787	1.06352	1.05144
aMAL8P1.2_1	aMAL8P1.2_1	1.13468	1.13468	0.989715	0.954344	1.19236	1.09778	0.940603	1.15757	1.11636	1.12329
aPF07_0118_7	aPF07_0118_7	0.97811	0.97811	1.03339	1.10366	0.858583	0.95168	0.975669	0.964638	1.04689	0.857141
bDd2var_182	bDd2var_182	1.17147	1.17147	1.25973	0.812599	1.36659	1.41601	1.15925	1.46588	1.1144	1.268
aPFI1495w_1	aPFI1495w_1	1.04036	1.04036	1.01056	0.841814	1.33091	1.13581	1.06849	1.17326	0.968617	1.19312
aPFL2060c_0	aPFL2060c_0	1.02433	1.02433	0.981773	0.812599	1.09894	0.995711	0.977732	1.05879	0.86882	1.10609
aPFF1035w_1	aPFF1035w_1	0.963962	0.963962	0.949014	1.04523	0.927857	0.948678	0.954011	0.927714	0.951006	0.998817
aPFA0505c_0	aPFA0505c_0	1.05545	1.05545	1.09395	0.874275	1.43167	1.20386	1.04993	1.32465	1.06646	1.18603
aMAL13P1.142_0	aMAL13P1.142_0	0.842287	0.842287	0.882504	1.18914	0.871178	0.773553	0.918944	0.745864	0.88741	0.953279
aPFE0155w_1	aPFE0155w_1	1.00075	1.00075	0.9917	1.06471	0.927857	1.03974	0.999391	0.98587	1.10168	1.02513
aPFE0205w_0	aPFE0205w_0	0.890391	0.890391	0.938095	1.11124	0.860682	0.865618	1.04271	0.840943	0.950027	0.963398
aPF07_0037_0	aPF07_0037_0	1.02716	1.02716		1.08094	1.42327	1.14782	1.11593	1.24434	1.25529	1.13341
aPF07_0049_2	aPF07_0049_2	1.01772	1.01772	1.03042	0.905653	1.02862	1.08678	0.990108	1.02464	0.970574	1.03525
aPFL1865w_1	aPFL1865w_1	1.07998	1.07998	1.0463	0.889423	1.35925	1.19085	1.13862	1.25541	0.977423	1.14657
aPF10_0326_0	aPF10_0326_0	1.06489	1.06489	1.13068	1.06796	1.04751	1.00472	1.18091	1.03941	1.06939	1.01804
aPFC0570c_0	aPFC0570c_0	0.970564	0.970564	1.0056	1.2216	0.999231	0.959686	0.964324	1.00064	1.09777	1.01906
aPF11_0114_0	aPF11_0114_0	1.10167	1.10167	0.981773	0.937032	1.0874	1.08878	1.12315	1.05972	0.990142	1.08585
aPF11_0179_0	aPF11_0179_0	0.917744	0.917744	0.878533	1.0355	0.878525	0.845604	0.928227	0.82802	0.908935	0.996793
aMAL8P1.50_0	aMAL8P1.50_0	1.09412	1.09412	1.02644	0.843978	1.12833	1.16884	1.02724	1.1908	1.07526	1.04031
aPF08_0113_0	aPF08_0113_0	1.08092	1.08092	1.08998	0.984641	1.30362	1.1128	0.965356	1.10126	0.96079	1.1749
aMAL13P1.37_0	aMAL13P1.37_0	0.954529	0.954529	0.974825	1.13612	0.928907	0.96569	0.984952	0.976639	1.08505	0.97453
aPFL1275c_0	aPFL1275c_0	0.887562	0.887562	0.956956	1.0355	0.959345	0.96569	0.977732	0.927714	0.940243	0.943159
aPF10_0026_1	aPF10_0026_1	1.06771	1.06771	0.903351	1.03441	0.899517	0.970694	0.916882	0.924022	0.963725	0.976554
aPFD0110w_1	aPFD0110w_1	0.990372	0.990372	0.96589	1.14478	0.774614	0.886633	0.995265	0.804019	0.96666	0.961374
aPFL0015c_0	aPFL0015c_0	1.01584	1.01584	1.03935	0.912145	1.0727	1.05575	1.10046	1.09387	0.992099	1.04942
aPF14_0381_0	aPF14_0381_0	0.995088	0.995088	0.891438	0.973821	1.05486	0.9797	1.03136	0.949869	0.980358	1.00388
aPF13_0308_1	aPF13_0308_1	0.988485	0.988485	0.980781	0.968411	0.823945	0.860615	0.87769	0.879713	0.898172	0.937087
aPFF0965c_0	aPFF0965c_0	0.909255	0.909255	0.911292	1.21403	0.853335	0.822588	0.849843	0.85479	1.05178	0.82577
aPF11_0191_0	aPF11_0191_0	0.946984	0.946984	0.957949	1.16534	0.967742	0.86762	0.957105	0.843712	0.961768	0.995781
aPFF0745c_3	aPFF0745c_3	0.81965	0.81965	0.932139	0.937032	0.918411	0.967691	0.898317	0.977562	0.912848	0.942147
aPF10_0380_0	aPF10_0380_0	1.08281	1.08281	1.22697	0.998707	0.988734	1.22888	1.10046	1.20464	1.19854	0.956314
aPFL0765w_1	aPFL0765w_1	1.00829	1.00829	1.10288	1.1253	0.868029	0.889636	0.971544	0.936945	1.1369	0.939111
aMAL8P1.154_2	aMAL8P1.154_2	0.995088	0.995088	1.06814	1.09068	0.971941	0.957684	1.05508	1.03849	1.05961	1.04233
aPFE0890c_0	aPFE0890c_0	1.09695	1.09695	1.04531	0.968411	1.06746	1.1168	1.09221	1.12433	1.08603	1.06358
aPFL1660c_1	aPFL1660c_1	1.1177	1.1177	1.13366	0.83965	1.19446	1.07177	1.03652	1.19818	1.042	1.14454
aPFE0250w_3	aPFE0250w_3	1.04885	1.04885	1.02148	1.0171	1.11469	1.06176	0.99114	1.04587	0.971552	1.0393
aPF11_0202_1	aPF11_0202_1	0.979996	0.979996	1.02049	1.08852		0.960686	1.28198	0.923099	0.989163	1.04334
aPFB0910w_0	aPFB0910w_0	1.07809	1.07809	0.980781	0.827748	1.04751	1.16083	0.992171	1.14557	0.958833	0.983638
aPF13_0226_1	aPF13_0226_1	1.06111	1.06111	1.00063	0.943524	1.00658	1.15082	1.07365	1.10403	0.989163	0.971494
aPF11_0207_1	aPF11_0207_1	0.946041	0.946041	0.974825	1.04199	0.989784	0.954682	0.975669	0.914791	0.922632	0.944171
aPFI0285w_1	aPFI0285w_1	0.931892	0.931892	0.885482	0.999789	0.898468	0.855611	0.912756	0.827097	0.941222	0.933039
aPFF1045w_2	aPFF1045w_2	0.915858	0.915858	0.915263	1.11448	0.788259	0.842602	0.940603	0.810481	0.9422	0.849045
aMAL13P1.80_0	aMAL13P1.80_0	0.92812	0.92812	0.924197	0.929458	0.981387	1.00172	0.982889	0.925868	0.902086	0.992746
aPFD0320c_2	aPFD0320c_2	1.04979	1.04979	0.983759	1.11773	0.884823	0.947677	1.03652	1.00987	1.05569	0.911788
aPFF0845c_3	aPFF0845c_3	1.07432	1.07432	1.14259			#N/A	#N/A	#N/A	#N/A	#N/A
aPF14_0350_0	aPF14_0350_0	1.17241	1.17241	1.18726	0.874275	0.967742	1.17084	0.998359	1.10126	1.09777	0.961374
aPF14_0582_0	aPF14_0582_0	1.05545	1.05545	1.00163	0.940278	1.03387	0.985704	1.03136	0.941561	0.965682	1.07775
aPFD0720w_0	aPFD0720w_0	0.913971	0.913971	1.01056	0.983559	1.08845	1.01873	0.924101	0.965562	0.974487	1.014
aPF10_0267_1	aPF10_0267_1	1.1394	1.1394	1.05523	0.971657	1.18606	1.19285	1.04477	1.1668	1.13397	1.15365
aPFE1040c_0	aPFE1040c_0	1.0979	1.0979	1.0731	0.905653	1.02652	1.20586	0.977732	1.22495	1.04004	0.943159
aPF11_0042_0	aPF11_0042_0	1.04791	1.04791	1.15252	1.02468	0.995032	1.01873	1.04477	0.94433	1.03515	1.04436
aPF14_0664_1	aPF14_0664_1	1.07243	1.07243	1.11777	0.983559	1.02127	1.01673	1.03136	0.984947	1.02536	0.89762
aPF11_0461_0	aPF11_0461_0	1.10733	1.10733	1.04431	0.833158	1.28997	1.21487	1.02621	1.18895	0.99112	1.13746
aPFD0690c_1	aPFD0690c_1	0.826253	0.826253	0.951	0.795287	1.09789	1.1258	0.960199	1.04587	0.998947	0.991734
ac5rRNA28s_1	ac5rRNA28s_1	0.971507	0.971507	1.00858	0.879685	0.89217	0.947677	1.01177	0.909253	0.854144	1.0312
aPF11_0181_1	aPF11_0181_1	0.986599	0.986599	0.983759	1.07228	1.08635	0.964689	0.972575	0.958177	1.03906	0.981614
aPFC0080c_1	aPFC0080c_1	1.00641	1.00641	0.959934	0.900243	0.954097	1.00172	1.0489	1.03202	0.920675	1.04537
aPF14_0216_1	aPF14_0216_1	1.11959	1.11959	1.12174	0.988969	1.23539	1.04074	0.993203	1.12987	1.09092	1.12127
aMAL8P1.90_0	aMAL8P1.90_0	1.00546	1.00546	1.087	0.888341	1.06011	1.00072	0.916882	1.08095	0.978401	0.932027
aPFF0450c_0	aPFF0450c_0	1.01678	1.01678	0.957949	0.909981	0.990834	0.935669	1.06643	0.964638	0.8199	0.995781
aPFI0370c_0	aPFI0370c_0			1.08204	0.892669	1.35715	1.30894	1.14584	1.36249	1.12712	1.1668
aPF07_0067_0	aPF07_0067_0	0.985655	0.985655	1.08998	1.06255	1.12518	0.986705	1.07262	1.01818	1.02341	1.04334
aPF10_0224_6	aPF10_0224_6	0.995088	0.995088	1.10983	1.02359	1.31831	1.07877	0.882847	1.20834	1.09581	1.10811
aPF08_0089_0	aPF08_0089_0	0.938495	0.938495	0.843789	1.05281	0.881674	0.917656	1.00145	0.867713	0.989163	0.963398
bHB3vsa_58	bHB3vsa_58	1.03659	1.03659	1.02942	0.93595	1.05906	0.9797	0	1.05879	0.953941	1.00691
aPFF0770c_2	aPFF0770c_2	0.915858	0.915858	1.02347	1.00736	0.935204	0.865618	0.96845	0.891714	0.924589	0.958338
aPFL1070c_0	aPFL1070c_0	1.05451	1.05451	1.08601	0.980313	1.12518	1.04675	0.948854	1.06526	1.08603	1.05245
aPF08_0139_0	aPF08_0139_0	1.10639	1.10639	1.05523	0.984641	0.958296	1.02173	1.0097	1.03387	1.01754	1.09698
aPF11_0357_2	aPF11_0357_2	1.02244	1.02244	0.903351	1.13504	0.912113	1.05375	0.969481	0.960946	1.07526	1.02209
aPFC0705c_3	aPFC0705c_3	0.920574	0.920574	1.01453	1.00195	1.06746	1.04575	0.807557	1.02556	0.969595	0.909764
aPFE0245c_1	aPFE0245c_1	0.983769	0.983769	0.973832	1.04199	0.904766	0.88163	0.914819	0.883406	0.916762	0.988698
aPFF1145c_2	aPFF1145c_2	1.07526	1.07526	1.04034	0.917555	0.97509	1.03174	1.04477	1.03941	0.956876	1.02412
aPF11_0466_0	aPF11_0466_0	1.08752	1.08752	1.07707	0.95218	1.25953	1.23288	1.07881	1.21941	1.223	1.13139
aMAL7P1.211_0	aMAL7P1.211_0	1.07432	1.07432	1.06218	0.951098	1.06955	1.10179	1.07365	1.26926	1.04395	1.00894
aMAL7P1.29_3	aMAL7P1.29_3	0.981883	0.981883	0.909307	0.954344		0.999714	0.950917	0.993255	0.963725	1.04132
aPFE1530c_1	aPFE1530c_1	0.954529	0.954529	1.0592	1.11773	0.836541	0.880629	0.975669	0.925868	0.995034	0.900656
aPFB0030c_0	aPFB0030c_0	1.21674	1.21674	1.24087	1.2097	0.991883	0.977699	0	1.20187	0	1.02715
aPF08_0025_0	aPF08_0025_0	0.94887	0.94887	0.943058	1.03441	1.02337	0.894639	0.987014	0.883406	0.914805	1.06864
aPF10_0222_0	aPF10_0222_0	0.937552	0.937552	0.920226	1.11557	0.871178	0.846605	0.896254	0.837251	0.910891	0.911788
aPF13_0297_0	aPF13_0297_0	0.954529	0.954529	0.974825	1.01277	1.00658	1.05075	0.970513	1.05879	1.13103	0.932027
aPF14_0691_1	aPF14_0691_1	0.906426	0.906426	0.967876	1.07228	0.8103	0.841601	0.924101	0.804942	0.904043	0.911788
aPFC0680w_1	aPFC0680w_1	1.09695	1.09695	1.04928	1.05714	1.12728	1.10379	0.974638	1.08464	1.12418	1.04638
aPF14_0481_1	aPF14_0481_1	0.945097	0.945097	0.960927	0.970575	0.859632	1.04375	0.930289	1.00156	0.965682	1.04436
aPF14_0360_0	aPF14_0360_0	0.980939	0.980939	0.903351	1.03117	1.00133	0.95168	1.0128	0.955407	0.931438	1.04233
aPFL1670c_1	aPFL1670c_1	0.940381	0.940381	0.983759	1.13612	0.958296	0.922659	0.928227	0.980331	1.00775	0.958338
aPF14_0088_1	aPF14_0088_1	1.07337	1.07337	1.16641	0.82883	0.956197	1.19986	1.04271	1.10403	0.978401	1.19716
aPF11_0466_1	aPF11_0466_1	0.929063	0.929063	0.972839	0.885095	0.951998	1.03474	0.905537	1.05141	0.980358	0.986674
aPF10_0044_0	aPF10_0044_0	0.994144	0.994144	1.08402	1.19347	1.03702	0.900643	0.973607	1.03479	1.05863	1.0393
aPF11_0092_0	aPF11_0092_0	0.993201	0.993201	0.975817	0.931622	0.986635	1.05075	1.0458	0.934176	0.945135	0.975542
aMAL8P1.42_0	aMAL8P1.42_0	0.971507	0.971507	0.931146	1.16209	0.983486	0.980701	1.01589	0.965562	1.1369	0.968458
aPFD0725c_0	aPFD0725c_0	0.962075	0.962075	0.980781	0.999789	1.12728	1.12981	1.0293	1.05418	1.05765	1.06358
bDd2rif_29	bDd2rif_29	1.07809	1.07809	1.07211	0.926212	0.968792	1.00772	1.03652	1.03018	0.921654	1.05852
aPF11_0016_0	aPF11_0016_0	1.26107	1.26107	1.04034			0	0	0	0.698578	0
aMAL13P1.238_0	aMAL13P1.238_0	0.828139	0.828139	0.790184	1.23026	0.758869	0.757541	0.878721	0.706171	0.96079	0.846009
aPFL1585c_1	aPFL1585c_1	0.955473	0.955473	0.962912	1.05822	0.821846	0.900643	0.987014	0.877867	0.943179	0.918871
aPF14_0440_1	aPF14_0440_1	0.965848	0.965848	1.0195	0.994379	1.00658	0.966691	0.944729	0.9471	0.91774	0.954291
aPFD0145c_0	aPFD0145c_0	0.92529	0.92529	0.830884	0.944606	0.868029	0.865618	0.990108	0.845559	0.830662	0.952267
aPFL1175w_1	aPFL1175w_1	0.880959	0.880959	0.844782	1.02251	0.858583	0.787563	0.916882	0.764326	0.880561	0.895596
aPFB0440c_0	aPFB0440c_0	1.06489	1.06489	0.956956	1.07986	0.900567	0.887634	0.975669	0.860328	0.909913	0.977566
aPF10_0127_1	aPF10_0127_1	1.05262	1.05262	0.966883	0.956508	0.950948	0.971694	1.06334	0.977562	1.00775	1.00185
aMAL13P1.243_0	aMAL13P1.243_0	1.01678	1.01678	0.960927	1.01169	1.09999	1.30994	1.05921	1.04679	1.04982	1.06763
aPFD0250c_2	aPFD0250c_2	0.974337	0.974337	0.970854	1.12855	0.809251	0.806576	0.963293	0.777249	0.937308	0.910776
aPF11_0084_0	aPF11_0084_0	0.967735	0.967735	0.934124	1.17183	0.754671	0.790565	1.08396	0.820635	0.925567	0.911788
aPF14_0084_1	aPF14_0084_1	0.970564	0.970564	1.01453	1.14586	0.94675	0.849607	0.965356	0.859405	0.955898	0.975542
aPF13_0270_0	aPF13_0270_0	0.994144	0.994144	1.10884	0.932704	0.979288	0.986705	0.918944	0.975716	1.05276	0.983638
aPF10_0317_0	aPF10_0317_0	0.97811	0.97811		1.24324	1.00973	0.925661	0.942666	0.975716	1.08309	0.90268
aPF14_0029_3	aPF14_0029_3	0.952643	0.952643	0.859672	0.928376	1.01602	0.984704	0.989077	0.974793	0	1.0231
aPF14_0471_0	aPF14_0471_0	1.01395	1.01395	1.1138	0.944606	1.00658	1.13181	1.0097	1.03664	1.04493	1.00084
aPFD1250w_1	aPFD1250w_1	1.24127	1.24127	1.0592	1.0712	0.993983	0.823588	0	1.00618	0.749455	1.01804
aPF11_0252_2	aPF11_0252_2	0.965848	0.965848	1.05225	1.03009	1.0706	0.963689	0.939572	0.970177	0.957855	1.00185
aPF14_0152_1	aPF14_0152_1	1.0696	1.0696	1.01552	1.01061	1.06221	1.10879	1.03136	1.0551	1.03221	1.00894
aPFL0690c_0	aPFL0690c_0	1.03942	1.03942	1.16145		1.19761	1.40801	0.990108	1.3348	1.03515	0
aPFL2015w_1	aPFL2015w_1	0.952643	0.952643	0.985744	0.963	0.94675	0.974696	0.882847	0.945253	0.996991	0.921907
aPF11_0077_1	aPF11_0077_1	0.902653	0.902653	1.01056	1.13071	0.977189	0.955683	1.02002	1.00895	1.07428	0.985662
aPF07_0079_0	aPF07_0079_0	1.02716	1.02716	1.06119	1.2941	0.97299	0.882631	1.06127	0.949869	1.14864	0.98465
aMAL7P1.153_0	aMAL7P1.153_0	1.12714	1.12714	1.1545	0.846142	1.44532	1.35797	1.02724	1.46403	1.11831	1.099
aPFB0210c_0	aPFB0210c_0	1.02433	1.02433	1.00361	1.16101	0.921559	0.871623	1.01486	0.883406	1.00482	0.971494
aPFL1705w_1	aPFL1705w_1	1.07903	1.07903	0.951	0.988969	0.938353	1.06076	0.974638	1.01818	0.962747	0.900656
aPF14_0469_0	aPF14_0469_0	0.986599	0.986599	1.01056	1.04848	0.921559	0.920658	1.0097	0.883406	0.927524	0.946195
aPF14_0094_0	aPF14_0094_0	0.981883	0.981883	1.00957	0.892669		0.989707	1.02311	1.01264	0.923611	1.06561
aPFE1170w_0	aPFE1170w_0	1.07526	1.07526	1.00758	0.988969	1.01393	0.964689	0.992171	0.964638	0.959811	1.00489
aPF14_0120_0	aPF14_0120_0	1.05923	1.05923	1.05623	0.971657	1.25114	1.14082	1.05302	1.14095	1.05472	1.15365
aPFL1930w_0	aPFL1930w_0	1.04036	1.04036	1.06119	0.76499	1.00868	1.2529	1.151	1.16403	0.938287	0.995781
aMAL13P1.320_0	aMAL13P1.320_0	0.934722	0.934722	0.908314	1.01061	0.939403	0.914653	1.02414	0.909253	0.986228	1.02918
aMAL7P1.162_2	aMAL7P1.162_2	1.04696	1.04696	0.988722	1.01169	1.00658	1.07977	0.998359	1.09849	1.04395	1.01602
aPFC0920w_0	aPFC0920w_0	0.981883	0.981883	0.966883	0.924048	1.15667	1.1228	1.00352	1.13541	1.02145	1.06966
aPF14_0293_0	aPF14_0293_0	1.08847	1.08847	1.12671	1.00628	1.28158	1.22287	1.04065	1.24618	1.11538	1.0818
aPF14_0716_0	aPF14_0716_0	1.00452	1.00452	1.00461	0.958672	1.17032	1.16183	0.969481	1.04218	1.05276	1.15466
bDd2rif_73	bDd2rif_73	1.07432	1.07432	0.972839	0.943524	1.03807	0.960686	0.998359	1.07172	0.970574	1.09495
aPFD0860w_0	aPFD0860w_0	0.952643	0.952643			1.04122	0.945676	1.05302	0.973869	1.04689	1.05852
aPFL0435w_1	aPFL0435w_1	1.01678	1.01678	0.967876	0.877521	1.13673	1.19085	0.907599	1.08649	1.04689	1.02715
aPFD0990w_0	aPFD0990w_0	1.04885	1.04885	1.10884	0.900243	1.29207	1.10779	1.19638	1.22588	1.00775	1.13543
aPFI0220w_0	aPFI0220w_0	0.989428	0.989428	0.997656	1.10691	0.971941	0.905647	1.0458	0.913868	1.11049	1.06561
aPF14_0517_0	aPF14_0517_0	0.843231	0.843231	0.927175	1.12963	0.75782	0.807577	0.912756	0.756018	0.857079	0.865237
aPF10_0373_0	aPF10_0373_0	1.17241	1.17241	1.06317	1.03982	1.05381	1.1248	1.03136	1.05418	1.09679	0.89762
aPFE1135w_0	aPFE1135w_0	0.930006	0.930006	0.966883	1.11448	0.880624	0.870622	0.999391	0.882483	1.0508	0.947207
aPFL1085w_0	aPFL1085w_0	0.932836	0.932836	0.967876	1.05281	1.0832	0.986705	0.959168	1.01264	1.06254	1.05043
aPFL1245w_1	aPFL1245w_1	0.968678	0.968678	1.03836	0.970575	1.0853	0.963689	0.933383	0.969254	0.86295	1.00894
aMAL7P1.162_5	aMAL7P1.162_5	1.12619	1.12619	1.0731	0.879685	1.16297	1.2619	0.977732	1.21757	1.08505	1.014
bDd2var_125	bDd2var_125	1.06111	1.06111	1.06913	0.888341	0.950948	1.00272	1.04993	1.06803	0.973509	0.952267
aPFI0860c_0	aPFI0860c_0	1.04885	1.04885	0.989715	0.912145	1.07165	1.12981	1.03652	1.11233	0.949049	1.04638
aPF11_0276_1	aPF11_0276_1	0.941325	0.941325	0.924197	1.15668	0.992933	0.894639	1.0097	0.929561	1.042	0.972506
aPFE1525w_1	aPFE1525w_1	1.1328	1.1328	0.989715	0.893751	1.16507	1.15683	1.02621	1.20003	1.11636	1.10609
aPF07_0064_1	aPF07_0064_1	0.952643	0.952643	1.00461	1.11124	0.850186	0.893639	0.943697	0.877867	0.938287	1.00287
aPF14_0544_0	aPF14_0544_0	0.903596	0.903596	0.962912	0.983559	0.875376	0.943674	1.00558	0.867713	0.955898	0.943159
aPFF0210w_0	aPFF0210w_0	1.05734	1.05734	1.01453	1.12206	0.988734	0.948678	1.02105	1.01356	1.06157	1.0231
achr4tRNAAla1_0	achr4tRNAAla1_0	1.0347	1.0347	0.933131	0.943524	0.999231	0.932666	0.962262	0.919407	0.901107	1.0646
aPF14_0364_1	aPF14_0364_1	0.983769	0.983769	1.08204	1.2216	0.934155	0	1.07984	1.00341	1.14082	0.991734
aPF14_0128_0	aPF14_0128_0	1.0413	1.0413	1.06218	0.901325	0.986635	1.19686	1.01589	1.11603	1.10853	1.10103
aPFC0560c_0	aPFC0560c_0	0.921517	0.921517	0.990708	1.0593	0.961445	0.954682	0.944729	0.955407	0.941222	0.96441
aPFB0245c_0	aPFB0245c_0	0.939438	0.939438	0.880519	1.06796	0.804003	0.820586	0.916882	0.814173	0.866863	0.91786
aPFL0930w_1	aPFL0930w_1	1.0696	1.0696	1.13763	0.92513	1.31831	1.23989	1.02724	1.31726	1.12125	1.16782
aPF11_0041_0	aPF11_0041_0	0.876243	0.876243	0.903351	0.85047	1.03072	1.01673	0.99114	1.05879	0.953941	1.02513
aPFL1410c_1	aPFL1410c_1	0.953586	0.953586	0.957949	1.13829	0.935204	0.833596	0.92307	0.818789	0.907956	1.01906
aPFB0415c_0	aPFB0415c_0	1.06394	1.06394	0.938095	1.00304	0.959345	1.05075	0.990108	0.965562	0.949049	0.997805
aPFE1395c_0	aPFE1395c_0	1.20071	1.20071	1.0731	0.768236	1.28682	1.21987	1.11078	1.17326	0.956876	1.1496
aPFF1070c_0	aPFF1070c_0	1.07809	1.07809	0.978795	0.975985	1.12204	1.17784	1.09015	1.14741	1.09972	1.09698
aPFE0710w_1	aPFE0710w_1	0.873413	0.873413	0.903351	0.974903	0.834442	0.831594	0.950917	0.835405	0.84436	0.961374
aPF08_0011_0	aPF08_0011_0	1.04413	1.04413	0.989715	0.798533	1.3645	1.22988	1.09737	1.27572	1.04787	1.13746
aPF10_0234_1	aPF10_0234_1	0.924347	0.924347	0.952985	1.0355	0.929956	0.89564	1.02724	0.910176	0.951006	0.951255
aPF14_0248_0	aPF14_0248_0	0.937552	0.937552	1.01354	0.998707	1.18291	1.24289	0.908631	1.04218	0.988185	1.0565
aPFI1805w_0	aPFI1805w_0	1.11205	1.11205	1.06715	1.05173	1.12099	1.00772	1.12109	1.14834	1.04493	1.10912
aPFD0190w_1	aPFD0190w_1	1.04602	1.04602	0.982766	0.926212	0.987685	1.06476	0.976701	1.07449	0.975466	1.03221
aPF10_0199_2	aPF10_0199_2	1.08941	1.08941	1.09693	0.841814	1.26478	1.21987	1.11903	1.20372	0.990142	1.05245
aPF13_0047_0	aPF13_0047_0	1.02716	1.02716	1.01155	0.889423	0.995032	1.06676	0.982889	1.07633	1.00384	0.931015
aPF14_0185_0	aPF14_0185_0	0.868697	0.868697	0.859672	0.975985	0.934155	0.932666	1.00867	0.894483	0.902086	1.01501
bDd2var_104	bDd2var_104	1.0413	1.0413	1.0324	0.799615	1.05381	1.1148	1.0819	1.17326	0.947092	1.03626
aPFI0635c_0	aPFI0635c_0	0.949813	0.949813	0.964898	1.04848	0.990834	1.02874	1.05612	1.00156	1.06744	1.00691
aPF11_0385_0	aPF11_0385_0	1.01678	1.01678		1.05064	1.31831	1.13181	0.932352	1.22403	1.23279	1.00793
aPFE0615w_0	aPFE0615w_0	0.990372	0.990372	1.00659	1.18482	1.17557	1.10079	1.06849	1.06526	1.23963	0.986674
aPF00_0001_0	aPF00_0001_0	0.965848	0.965848	1.04431	1.05389	0.842838	0.955683	0.96123	0.852943	0.974487	0.949231
aPFF1535w_0	aPFF1535w_0	1.06866	1.06866	1.04729	1.06687	0.870128	0.848606	0.98392	0.925868	0.924589	0.995781
aPF08_0134_0	aPF08_0134_0	0.981883	0.981883	0.972839	1.02251	0.817648	0.781558	0.944729	0.818789	0.916762	0.908752
aPF11_0279_0	aPF11_0279_0	1.12053	1.12053	1.06715	0.95218	1.16402	1.32495	1.02724	1.2268	1.10168	0.941135
aPF11_0416_0	aPF11_0416_0	0.963962	0.963962	0.864636	0.915391	0.940452	1.01372	0.967419	0.979408	0.976444	0.98465
aPF14_0022_0	aPF14_0022_0	1.09695	1.09695	0.998649	0.996543	1.12518	1.07477	0.989077	0.998793	1.10559	1.12228
aPFI0550w_1	aPFI0550w_1	1.00075	1.00075	1.0195	0.973821	1.01183	1.03574	1.07777	0.9471	0.987207	0.971494
aPF14_0149_1	aPF14_0149_1	0.973394	0.973394	0.979788	1.02143	1.04226	1.03274	1.09118	0.969254	1.04004	1.01096
aPFL0295c_1	aPFL0295c_1	1.00641	1.00641	0.999642	1.21728	0.933105	0.890636	0.993203	0.951715	1.07135	0.96947
aMAL13P1.26_1	aMAL13P1.26_1	0.888505	0.888505	1.03339	1.0712	0.899517	0.899643	0.999391	0.919407	0.937308	0.995781
aPF10_0025_1	aPF10_0025_1	1.02527	1.02527	1.05722	1.03225	1.11154	1.09078	1.03961	1.07449	1.14375	1.05144
aPFL0610w_0	aPFL0610w_0	0.972451	0.972451	0.845774	0.997625	0.89217	0.910651	0.958136	0.882483	0.89328	0.878393
aPF11_0508_1	aPF11_0508_1	1.12902	1.12902	1.04133	0.884013	1.16507	1.27291	1.06849	1.30526	1.14766	0.956314
aPFC0565w_1	aPFC0565w_1	1.09224	1.09224	1.13465	0.979231	1.4894	1.19886	1.0128	1.33757	1.21811	1.19514
aPF14_0179_4	aPF14_0179_4	1.0215	1.0215	1.01255	0.927294	1.30467	1.15583	1.07055	1.06987	0.978401	1.1921
aPFL2305w_0	aPFL2305w_0	1.01772	1.01772	0.915263	1.00412	0.878525	0.976698	0.967419	0.955407	0.956876	0.985662
aPFE0555w_0	aPFE0555w_0	0.92246	0.92246	1.00659	0.956508	1.01707	0.949679	1.00352	0	0.935351	1.01906
aPFB0820c_2	aPFB0820c_2	1.09601	1.09601	1.13961	1.03117	1.05906	1.17984	0.98392	1.21295	1.20245	1.00084
aPFC0760c_2	aPFC0760c_2	1.0149	1.0149	1.05325	1.04415	0.936254	0.952681	0.96845	0.876944	0.955898	1.06358
aMAL13P1.120_0	aMAL13P1.120_0	1.07149	1.07149	1.17535	1.18914	1.0748	1.06676	1.0489	0.934176	1.10951	0.97959
aPFB0875c_0	aPFB0875c_0	1.03659	1.03659	1.07509	1.00087	1.01812	1.04375	0.89316	0.991408	0.996991	0.997805
aPF11_0333_1	aPF11_0333_1	0.965848	0.965848	0.906329	1.14586		0.857613	1.00455	0.89356	1.01265	1.06561
aPFL0345w_0	aPFL0345w_0	0.883789	0.883789	0.927175	1.13721	0.900567	0.910651	0.925133	0.877867	0.993077	0.960362
aPFC0305w_0	aPFC0305w_0	0.971507	0.971507	0.982766	1.20429	0.849136	0.880629	0.93854	0.864021	1.11733	0.926967
aPF07_0120_1	aPF07_0120_1	1.00075	1.00075	1.0185	1.07553	0.954097	0.899643	0.997328	0.876021	0.921654	0.90268
aPF11_0397_0	aPF11_0397_0	1.07809	1.07809	0.947029	0.816927	1.01812	1.07077	1.01486	1.01449	0.951984	1.05346
aPF14_0384_0	aPF14_0384_0	0.930949	0.930949	0.931146	1.11448	0.860682	0.920658	0.947823	0.852943	0.99112	0.896608
aPFL0370w_1	aPFL0370w_1	0.855492	0.855492	0.804081	1.06363	0.908964	0.873624	0.921007	0.925868	0.990142	0.935063
aPFI0175w_1	aPFI0175w_1	1.1394	1.1394	1.03141	0.980313	1.11679	1.20986	1.05921	1.35972	1.23572	1.01906
aPFC0075c_0	aPFC0075c_0	0.994144	0.994144	0.971846	1.08202	0.935204	0.940672	1.04168	1.03387	1.01069	0.958338
aPF11_0346_0	aPF11_0346_0	1.0762	1.0762	1.01155	0.917555	0.951998	1.02473	1.03136	0.986793	1.01167	0.96441
aMAL8P1.7_2	aMAL8P1.7_2	1.00263	1.00263	0.892431	1.01386	0.720034	0.818585	0.916882	0.790173	0.858058	0.847021
aMAL13P1.229_0	aMAL13P1.229_0	1.03753	1.03753	0.983759	1.03009	0.916311	0.924661	1.02002	0.837251	0.906978	1.09394
aPF14_0490_0	aPF14_0490_0	1.0347	1.0347	1.06715	1.0355	1.01393	0.974696	1.01899	0.981254	1.05667	1.00084
aPF08_0011_2	aPF08_0011_2	1.05074	1.05074	1.07012	0.894833	1.03282	1.21287	0.959168	0	1.04787	0.921907
aPF14_0710_4	aPF14_0710_4	0.993201	0.993201	1.22895	0.981395	1.10629	1.15983	1.06127	1.17603	1.08211	0.982626
bHB3vsa_217	bHB3vsa_217	1.05734	1.05734	0.859672	1.02251	1.24694	1.05275	1.07365	1.21295	1.06352	1.03424
aPF10_0186_1	aPF10_0186_1	0.92812	0.92812	0.964898	1.0355	0.851235	0.975697	0.954011	0.847405	0.896215	0.947207
aPFL0545w_0	aPFL0545w_0	0.830969	0.830969	0.900373	1.09825	0.873277	0.832595	0.965356	0.836328	0.880561	0.982626
aPFD0820w_0	aPFD0820w_0	1.07809	1.07809	1.09891	0.822337	1.14513	1.20286	1.09015	1.22588	0.972531	1.10811
aPFF0310w_0	aPFF0310w_0	1.03659	1.03659	0.97681	0.955426	1.14723	1.03174	0.946791	1.13357	1.01362	1.07067
aPFL1240c_0	aPFL1240c_0	1.09978	1.09978	1.08898	0.876439	1.52194	1.32495	1.06746	1.35511	1.07135	1.22955
aPFD0005w_1	aPFD0005w_1			1.54959			0	0	0.991408	0	0
aPFE1240w_1	aPFE1240w_1	1.04885	1.04885	1.05523	1.03225	1.04226	1.17884	0.958136	1.11233	0.984271	0.975542
aPF11_0127_1	aPF11_0127_1	0.940381	0.940381	0.949014	1.13396	0.908964	0.908649	1.00352	0.876944	1.05863	0.97959
aPFI1465w_1	aPFI1465w_1	0.931892	0.931892	0.979788	0.975985	1.00238	0.927663	0.912756	0.955407	0.878604	1.00489
aPFD1050w_0	aPFD1050w_0	1.0413	1.0413	0.984751	0.809353	1.04226	1.13881	0.962262	1.0948	0.956876	1.02918
bDd2ste_27	bDd2ste_27	0.940381	0.940381	1.00262	1.18049	0.859632	0.877627	0.998359	0.804942	0.977423	1.014
aPF11_0101_0	aPF11_0101_0	1.08186	1.08186	1.13068	0.906735	1.03177	1.02173	1.07777	0.995101	0.948071	0.948219
aPF13_0298_2	aPF13_0298_2	0.930949	0.930949	0.922212	1.06146	0.907914	0.902645	1.00042	0.919407	0.993077	0.936075
aPF14_0046_0	aPF14_0046_0	0.979996	0.979996	0.971846	0.955426	1.06221	1.03074	1.00042	0.987716	1.00775	1.02513
aPFD0085c_1	aPFD0085c_1	1.04885	1.04885	0.908314	1.1675	0.831293	0.914653	0.973607	0.785557	1.01852	0.951255
aPF14_0478_1	aPF14_0478_1	0.996974	0.996974	0.951	1.08852	0.915262	0.912652	0.952979	0.951715	0.980358	0
aPFC0965w_4	aPFC0965w_4	0.970564	0.970564	1.00461	1.14694	0.9478	0.852609	1.0097	0.883406	1.03026	0.940123
aPFB0440c_1	aPFB0440c_1	0.999804	0.999804	1.14358	1.08311	0.938353	1.01272	1.06024	1.08464	1.03613	1.01703
aPFB0720c_0	aPFB0720c_0	1.03942	1.03942	1.03439	0.879685	1.12413	1.08878	1.1871	1.09387	0.988185	1.19413
aPFL0985c_0	aPFL0985c_0	1.01772	1.01772	1.12274	0.924048	1.38654	1.13181	0.959168	1.24711	0.980358	1.13139
aPFL1930w_3	aPFL1930w_3	0.834742	0.834742	0.997656	1.10366	0.642363	0.768549	0.864282	0.86679	0.861971	0.732668
aPFL1835w_0	aPFL1835w_0	1.13751	1.13751	1.10884	0.838568	1.22805	1.22688	1.02827	1.18803	0.933395	1.04334
aPF10_0335_0	aPF10_0335_0	1.04225	1.04225	1.05623	0.953262	1.0769	0.985704	1.03549	1.05418	1.03026	1.08079
aPFL1385c_0	aPFL1385c_0	0.968678	0.968678	1.11876	0.959754	1.18186	1.19485	1.00661	1.17603	1.11146	0.957326
aPF14_0419_5	aPF14_0419_5	0.946041	0.946041	1.05424		0.689595	0	1.00352	0.887098	0.878604	0.789339
aPF13_0034_0	aPF13_0034_0	0.90171	0.90171	0.910299	0.960836	0.852285	0.79757	0.970513	0.814173	0.865885	0.926967
aMAL7P1.132_3	aMAL7P1.132_3	0.9517	0.9517	0.996664	1.18049	0.942552	0.958685	0.933383	0.965562	1.06744	0.998817
arps8_0	arps8_0	0.906426	0.906426	1.00659	0.859126	0.752572	0.938671	1.05508	0.890791	0.952963	0.879405
aPF11_0079_0	aPF11_0079_0	0.952643	0.952643	0.944051	1.01927	0.879575	0.888635	0.959168	0.884329	0.883496	0.923931
aPF14_0622_0	aPF14_0622_0	0.892278	0.892278	0.907321	0.992215	0.928907	0.874625	0.988046	0.864944	0.9422	0.96947
aMAL7P1.28_1	aMAL7P1.28_1	0.877186	0.877186	0.92519	1.03982	0.879575	0.821587	0.981858	0.868636	0.866863	0.944171
aPF14_0301_0	aPF14_0301_0	0.847947	0.847947	0.927175	1.17616	0.792457	0.803574	0.999391	0.828943	1.01949	0.935063
aPFL2125c_1	aPFL2125c_1	0.963962	0.963962	0.954971	1.0474	0.94675	0.896641	0.990108	0.910176	0.948071	0.970482
aPFL2235w_1	aPFL2235w_1	1.00924	1.00924	1.04332	1.15344	1.04017	1.04174	0.927195	1.14003	1.14473	1.04739
aPF10_0306_0	aPF10_0306_0	1.11393	1.11393	1.13663	1.01277	1.12204	1.1228	1.19329	1.09664	0.959811	1.08888
aPF10_0356_0	aPF10_0356_0	1.04602	1.04602	1.14557	0.974903	0.982437	1.01473	0.80962	1.0828	0.971552	0.905716
aPF14_0379_1	aPF14_0379_1	0.913028	0.913028	0.867614	1.0896	0.826045	0.879628	0.940603	0.808635	0.93633	0.860177
aPFE0165w_0	aPFE0165w_0	0.915858	0.915858	0.961919	1.08852	0.834442	0.802573	1.02105	0.821558	0.963725	0.945183
aPFL1260w_0	aPFL1260w_0	0.964905	0.964905	0.97681	0.973821	1.15982	1.02974	1.00455	1.0828	1.02536	1.04436
aPFD0340c_2	aPFD0340c_2	1.05357	1.05357	0.996664	0.951098	0.889021	0.891637	0.958136	0.909253	0.883496	0.944171
aPF13_0148_2	aPF13_0148_2	0.916801	0.916801	0.971846	0.988969	0.996082	0.915654	1.01899	0.914791	0.963725	0.966434
aPFL1760w_0	aPFL1760w_0	1.12242	1.12242	1.07409	0.827748	1.10839	1.14682	1.00145	1.14187	0.951006	1.02209
aMAL7P1.37_0	aMAL7P1.37_0	1.15166	1.15166	1.01552	0.990051	0.916311	1.01172	1.03136	0.989562	1.04787	0.960362
aMAL8P1.112_1	aMAL8P1.112_1	0.940381	0.940381	0.868606	1.03009	0.918411	0.903646	0.919976	0.855713	0.906978	1.0059
aMAL8P1.78_0	aMAL8P1.78_0	0.977167	0.977167	0.909307	1.05822	0.859632	0.883631	0.950917	0.827097	0.914805	0.955303
aPF13_0248_0	aPF13_0248_0	1.02244	1.02244	1.00659	0.942442	0.941502	1.08978	1.07674	1.01541	0.935351	0.997805
aMAL13P1.294_1	aMAL13P1.294_1	0.843231	0.843231	0.994678	1.10042	0.746274	0.845604	0.980826	0.862174	1.04982	0.868273
aPFE0570w_8	aPFE0570w_8	0.959246	0.959246	0.993686	1.05822	0.875376	0.928663	0.957105	0.895406	0.986228	0.896608
aMAL8P1.17_1	aMAL8P1.17_1	1.07149	1.07149	1.14855	0.950016	1.36659	1.26991	1.10975	1.2988	1.223	0
aPF10_0289_0	aPF10_0289_0	0.980939	0.980939	0.92519	1.23026	0.857533	0.874625	0.966387	0.864944	1.08407	0.927979
aPFC0610c_1	aPFC0610c_1	1.0215	1.0215	1.03042	1.08743	1.05801	1.17784	0	1.01264	1.03613	0.997805
aPFE0835w_0	aPFE0835w_0	1.05357	1.05357	1.0185	1.04632	0.986635	1.00472	1.03136	1.00525	1.06841	0.983638
aPFC0350c_0	aPFC0350c_0	1.00358	1.00358	1.00659	1.05714	1.03807	0.914653	0.989077	0	1.00775	1.01501
bDd2var_38	bDd2var_38	1.146	1.146	1.15351	0.796369	1.12623	1.32795	1.18091	1.35788	1.10168	1.08484
aPFI1595c_0	aPFI1595c_0	0.896994	0.896994	0.896402	1.02035	0.959345	0.976698	1.06437	0	0.973509	0.945183
aPFA0410w_0	aPFA0410w_0	1.01678	1.01678	1.11777	1.14045	0.979288	1.01172	0.989077	1.07356	1.20735	0.997805
aPFA0295c_0	aPFA0295c_0	1.00263	1.00263	1.06814	1.01277	0.966693	0.868621	0.979795	0.894483	0.87469	1.04942
aPFC0581w_0	aPFC0581w_0	1.12902	1.12902	1.28256	0.975985	1.23119	1.14982	1.09221	1.11603	1.10951	1.268
aMAL8P1.20_1	aMAL8P1.20_1	1.02244	1.02244	1.03935	0.945688	1.25114	1.19485	1.04477	1.20464	1.12907	1.09091
aPFC0425w_0	aPFC0425w_0	1.09035	1.09035	1.08204	1.06904	1.15667	1.01973	1.10046	1.05603	1.0782	1.06358
aMAL13P1.100_0	aMAL13P1.100_0	0.959246	0.959246	1.02347	0.895915	1.04226	1.05475	0.995265	0	0.967639	1.02209
aPFL2190c_0	aPFL2190c_0	0.932836	0.932836	1.02644	0.944606	1.16507	1.12681	0.927195	1.0911	0.9422	0.905716
aPF07_0082_5	aPF07_0082_5	0.972451	0.972451	1.03042	1.11773	0.933105	0.898642	0.972575	0.950792	0.968617	1.02918
aPFC0166w_0	aPFC0166w_0	1.10073	1.10073	0.939088	0.877521	0.989784	1.09578	0.919976	1.06618	1.01362	0.972506
aPF08_0058_0	aPF08_0058_0	1.0149	1.0149	0.958941	0.974903	0.866979	0.9797	0.904505	1.04679	1.00384	0.933039
aPF08_0032_1	aPF08_0032_1	0.929063	0.929063	0.963905	1.13721	0.862781	0.848606	0.967419	0.795711	0.934373	0.996793
aPFI1650w_0	aPFI1650w_0	0.988485	0.988485	1.02347	1.16534	0.950948	0.985704	1.01589	0.924022	1.0645	1.00388
aPF11_0428_0	aPF11_0428_0	1.00546	1.00546	1.00262	0.984641	0.987685	0.970694	0.996297	0.903714	1.02536	0.970482
aPFD1045c_2	aPFD1045c_2	1.04979	1.04979	1.11777	1.08202	1.11049	1.09778	0.906568	1.20834	0.978401	0.906728
aPFC0525c_1	aPFC0525c_1	0.941325	0.941325	0.934124	1.0355	0.915262	0.96569	1.00248	0.996024	0.992099	0.966434
aPFL1970w_3	aPFL1970w_3			1.25675			#N/A	#N/A	#N/A	#N/A	#N/A
aPFI1165c_0	aPFI1165c_0	1.1875	1.1875	1.04928	0.766072	1.45791	1.45004	1.06437	1.37726	1.00873	1.23562
aPFF0290w_0	aPFF0290w_0	0.894164	0.894164	0.951993	1.08635	0.798755	0.864618	0.917913	0.857559	0.919697	0.948219
aPF14_0101_6	aPF14_0101_6	0.983769	0.983769	0.858679	1.0474	0.853335	0.824589	1.02311	0.90556	1.03515	0.973518
aPF14_0229_0	aPF14_0229_0	0.989428	0.989428	0.91427	1.01386	1.07795	0.905647	0.99114	0.9471	0.961768	1.0818
aPFE0635c_2	aPFE0635c_2	0.897937	0.897937	1.05523	1.18698	0.86593	0.863617	1.0097	0.860328	0.96666	0.97959
aPF10_0278_1	aPF10_0278_1	1.01678	1.01678	0.995671	1.00195	0.992933	1.06876	1.07055	0.950792	1.00286	0.997805
aPF10_0230_0	aPF10_0230_0	1.04885	1.04885	1.10387	1.11232	1.04751	0.947677	0.959168	1.01449	1.13886	1.07573
aPFE0330w_0	aPFE0330w_0	1.03187	1.03187	0.966883	1.04307	0.887972	0.805576	0.912756	0.809558	0.931438	0.965422
aPF14_0151_0	aPF14_0151_0	0.866811	0.866811	0.910299	1.10366	0.821846	0.844603	0.984952	0.890791	0.946114	0.965422
aPF07_0037_1	aPF07_0037_1	1.02904	1.02904	1.08501	0.981395	1.17871	0.926662	1.01899	1.04956	0.946114	1.08585
aPF14_0665_0	aPF14_0665_0	0.985655	0.985655	0.947029	0.878603	1.05276	1.01473	1.10356	1.0191	0.869798	1.0393
aPF14_0561_1	aPF14_0561_1	0.94887	0.94887	0.968868	0.896997	0.985586	0.9797	1.09943	0.960946	0.945135	0.928991
aPF13_0352_0	aPF13_0352_0	0.923404	0.923404	0.951993	1.14478	0.944651	0.866619	0.909662	0.874175	0.996012	1.01096
aPFI0910w_1	aPFI0910w_1	0.869641	0.869641	0.932139	0.943524	0.960395	0.880629	0.948854	0.939715	0.872734	1.07067
aMAL13P1.470_0	aMAL13P1.470_0	1.06583	1.06583	1.16443	0.926212	1.02967	1.04575	1.09221	1.05603	0.982315	0.957326
bDd2var_170	bDd2var_170	1.14223	1.14223	1.0731	0.92513	1.17137	1.21087	1.0623	1.14095	1.042	1.0646
aPF11_0241_3	aPF11_0241_3	0.981883	0.981883	0.999642	1.03117	0.923659	0.975697	1.03136	0.962792	0.978401	0.972506
aPFD0403w_0	aPFD0403w_0	1.05451	1.05451	0.994678	0.945688	0.961445	1.06676	1.00764	1.08833	1.05961	0.990722
achr13MALr.18_0	achr13MALr.18_0	0.979053	0.979053	1.01552	1.03117	0.9478	0.899643	0.977732	0.911099	0.980358	0.935063
aPFL1460c_0	aPFL1460c_0	1.01772	1.01772	1.1277	1.24433	0.997131	0.916655	1.01589	0.926791	1.0919	1.00995
aMAL7P1.25_1	aMAL7P1.25_1	1.01678	1.01678	1.02347	0.82883	1.09055	1.00172	0.987014	1.05141	0.971552	1.014
aPF11_0482_2	aPF11_0482_2	1.09601	1.09601	1.11281	0.868864	1.11784	1.27391	0.954011	1.24618	1.15941	1.01906
aPF13_0176_1	aPF13_0176_1	1.00263	1.00263	0.959934	0.980313	0.989784	0.96569	1.03652	0.989562	0.972531	0.994769
aPF11_0326_2	aPF11_0326_2	1.01772	1.01772	0.995671	0.858044	1.16927	1.17284	1.04993	1.19449	1.00286	1.06966
aPFD1070w_1	aPFD1070w_1	1.0149	1.0149	1.0602	1.04091	0.984536	0.961687	1.02414	1.01356	0.933395	0.997805
aPFL0435w_0	aPFL0435w_0	1.05828	1.05828	0.94008	0.85588	1.04122	0.970694	0.876659	1.06433	0.961768	1.10609
aMAL8P1.113_3	aMAL8P1.113_3	0.905483	0.905483	0.98773	0.985723	0.956197	1.07677	0.997328	1.03849	1.00775	0.921907
aPFE0160c_0	aPFE0160c_0	0.961132	0.961132	1.01354	1.08527	0.989784	0.956684	1.01899	1.01079	1.02341	0.982626
aMAL13P1.234_3	aMAL13P1.234_3	1.09601	1.09601	1.07906	0.968411	1.01393	1.1238	0.976701	1.0671	1.00775	0.992746
aPF14_0722_0	aPF14_0722_0	0.936608	0.936608	0.993686	0.983559	0.948849	0.92366	1.02517	0.988639	0.96079	0.994769
aPFL0925w_2	aPFL0925w_2	1.05074	1.05074	1.03637	1.03117	1.05381	1.16083	1.14688	1.12064	1.05765	1.16478
aPFF1135w_0	aPFF1135w_0	1.09318	1.09318	1.14755	0.888341	1.23119	1.2559	1.25001	1.23511	1.14864	1.07269
aPFE0915c_0	aPFE0915c_0	0.984712	0.984712	0.970854	0.996543	0.97404	0.872623	0.999391	0.940638	0.894258	1.06156
aPFF1065c_0	aPFF1065c_0	0.976223	0.976223	0.931146	1.03441	0.898468	0.913653	1.01899	0.913868	0.920675	0.906728
aPFF0640w_0	aPFF0640w_0	0.985655	0.985655	0.93611	0.985723	0.977189	0.996712	0.93854	0.914791	1.01265	0.948219
aPFD0565c_1	aPFD0565c_1	0.946984	0.946984	0.98773	0.928376	0.844938	0.8396	0.896254	0.868636	0.900129	0.870297
aPFI0570w_0	aPFI0570w_0	1.02527	1.02527	0.960927	0.917555	0.938353	1.10879	1.03961	0.981254	1.00482	0.916848
aPF13_0318_0	aPF13_0318_0	1.0347	1.0347	1.01453	0.83424	1.05801	1.1228	0.946791	1.09572	0.99112	0.954291
aPFI0195c_0	aPFI0195c_0	1.07337	1.07337	1.07012	0.864536	1.34665	1.33595	1.14069	1.21941	1.03417	1.16883
aPFI0450c_0	aPFI0450c_0	1.05545	1.05545	1.1138	1.01386	0.876426	0.997713	0.865314	0.892637	0.978401	1.0059
aMAL13P1.237_0	aMAL13P1.237_0	0.936608	0.936608	0.910299	1.08311	0.923659	0.938671	0.960199	0.876021	1.00482	1.00894
aMAL7P1.43_1	aMAL7P1.43_1	1.16204	1.16204	1.16046	1.13504	1.19446	1.05575	1.02105	1.09203	1.06646	1.10912
aMAL13P1.1_1	aMAL13P1.1_1	1.22429	1.22429	1.04431	0.956508	1.04541	1.1188	1.00764	1.00895	0.969595	1.03221
aPFC0820w_3	aPFC0820w_3	1.02433	1.02433	1.16741	0.900243	0.927857	0.934668	1.12212	1.04956	0.997969	0.967446
aPF11_0036_0	aPF11_0036_0	0.956416	0.956416	0.946036	0.972739	0.910014	0.908649	0.995265	0.935099	0.929481	0.982626
aPF13_0151_1	aPF13_0151_1	0.945097	0.945097	1.00858	1.01494	0.94675	0.941673	0.93854	0.956331	0.937308	0.975542
aPFC1065w_1	aPFC1065w_1	1.03848	1.03848	0.939088	0.921884	1.05276	1.22488	1.03961	1.09203	1.03026	1.05751
aPFF1290c_0	aPFF1290c_0	1.08375	1.08375	1.13763	0.991133	1.12833	1.1188	1.10562	1.15941	1.08407	1.04638
aPF07_0049_0	aPF07_0049_0	1.30823	1.30823	1.20116	0.722791	1.60066	1.61115	1.06437	1.69204	1.08407	1.38843
aPFF1280w_0	aPFF1280w_0	0.988485	0.988485	0.928168	1.01386	0.900567	0.941673	1.00867	0.994178	0.972531	0.971494
aPFL0375w_0	aPFL0375w_0	0.949813	0.949813	1.00758	1.00412	0.955147	1.00572	0.93854	0.923099	0.999926	0.908752
aPF14_0146_0	aPF14_0146_0	0.973394	0.973394	0.931146	1.0052	0.971941	0.995711	1.0128	0.921253	0.933395	0.962386
aMAL13P1.249_2	aMAL13P1.249_2	1.06677	1.06677	0.921219	0.950016	0.950948	1.02173	1.01899	0.972946	1.0146	0.939111
aPF07_0024_1	aPF07_0024_1	0.986599	0.986599	0.983759	1.01927	0.984536	0.916655	0.96845	0.953561	0.940243	1.01197
aPFE0055c_0	aPFE0055c_0	0.964905	0.964905	0.995671	1.03766	0.950948	0.833596	0.932352	0.885252	0.913827	1.02412
bHB3vsa_130	bHB3vsa_130	1.13563	1.13563	1.16641	0.979231	1.16822	1.1248	1.15616	1.15018	1.11146	1.07269
aPF07_0045_0	aPF07_0045_0	0.968678	0.968678	1.03538	0.819091	0.840739	0.991709	0.861188	0.974793	0.921654	0.871309
aPFE0215w_1	aPFE0215w_1	0.963962	0.963962	1.02347	0.890505	1.00133	0.998714	1.01486	1.00987	0.884474	0.951255
aPF11_0431_0	aPF11_0431_0	1.05262	1.05262	0.992693	1.00736	1.01288	1.12781	1.05096	1.10218	1.14473	0.994769
aPF13_0333_1	aPF13_0333_1	1.08281	1.08281	1.05523	0.994379	1.0937	1.01372	1.07159	1.07356	1.02047	1.09597
aPFA0435w_0	aPFA0435w_0	1.06771	1.06771	1.08898	0.940278	1.00868	1.00072	1.01692	1.07541	0.947092	1.08382
aPFC0755c_0	aPFC0755c_0	0.970564	0.970564	0.970854	1.05173	0.991883	0.941673	1.04065	0.987716	1.02536	0.965422
aPF10_0163_0	aPF10_0163_0	1.08186	1.08186	1.06218	0.907817	0.999231	1.15983	0.966387	1.12249	1.06157	0.91786
aPFC0760c_4	aPFC0760c_4	1.04696	1.04696	1.08005	1.04632	1.11154	1.05275	1.04477	0.993255	1.07428	0.971494
aPF10_0354_0	aPF10_0354_0	1.08564	1.08564	1.04133	0.91972	0.86593	1.04975	0.909662	0.990485	1.04689	1.00084
aPF14_0218_0	aPF14_0218_0	1.05074	1.05074	1.04928	1.26272	0.944651	0.904646	0.967419	0.912945	1.02634	0.956314
aMAL7P1.161_0	aMAL7P1.161_0	1.08941	1.08941	1.07409	0.888341	1.22385	1.21787	0.985983	1.24895	1.10755	1.08484
aMAL8P1.35_0	aMAL8P1.35_0	1.11393	1.11393	0.985744	0.918638	1.16612	1.11079	1.06024	1.09203	0.984271	1.10103
aPFI0625c_0	aPFI0625c_0	0.979996	0.979996	1.06715	1.0052	1.0748	0.919657	0.965356	0.963715	1.00971	1.04537
aPFA0240w_1	aPFA0240w_1	0.968678	0.968678	0.975817	0.999789	0.94675	0.922659	1.02517	0.952638	0.905999	0.95935
aPFE1120w_8	aPFE1120w_8	0.985655	0.985655	0.993686	0.958672	0.97509	1.02874	1.0097	0.998793	1.00286	1.01197
aPFI0030c_0	aPFI0030c_0	0.952643	0.952643	1.18925	0.974903	0.912113	0.991709	0	0.832635	0.900129	0
aPFL0405w_1	aPFL0405w_1	0.931892	0.931892	0.966883	0.985723	1.00553	0.9797	1.03549	0.940638	0.974487	1.0231
aPF10_0107_0	aPF10_0107_0	1.063	1.063	1.1138	0.909981	1.3519	1.1228	0.919976	1.16772	1.10559	1.10406
aPF11_0454_0	aPF11_0454_0	1.01584	1.01584	1.06218	0.894833	1.05906	1.04375	1.09324	0.995101	1.04982	1.03727
aPFL0270c_1	aPFL0270c_1	0.993201	0.993201	0.979788	0.986805	1.03492	0.996712	1.01899	1.02372	1.01949	1.0565
aPFL0885w_1	aPFL0885w_1	0.895107	0.895107	0.924197	1.11232	0.874327	0.860615	0.947823	0.843712	0.963725	0.946195
atRNARNALys_0	atRNARNALys_0	0.902653	0.902653	0.772315	0.833158	0.86593	0.943674	0.969481	0.829866	0.996012	1.08484
aPFF0285c_0	aPFF0285c_0	0.863038	0.863038	1.02247	0.983559	0.751522	0.816583	1.05612	0.793865	0.821857	0.908752
aPFD0745c_0	aPFD0745c_0	0.913971	0.913971	0.889453	1.06687	0.910014	0.917656	0.886972	0.938792	1.0645	0.915836
arpoC_1	arpoC_1	0.930949	0.930949	0.741542	0.756334	0.759919	0.914653	1.03343	0.869559	1.02634	1.00894
aPFF0960c_0	aPFF0960c_0	0.929063	0.929063	0.998649	1.00195	0.875376	0.897641	0.962262	0.877867	0.983293	0.867261
aPF14_0211_0	aPF14_0211_0	0.992258	0.992258	1.06516	1.03009	1.03072	1.08578	1.04271	1.08372	1.07918	0.975542
aPF13_0164_1	aPF13_0164_1			1.03736	1.12639	1.09055	1.09578	0.966387	1.03479	1.06157	1.01197
aMAL7P1.38_1	aMAL7P1.38_1	1.10544	1.10544	1.14458	1.03766	1.13568	1.14382	0.970513	1.07264	1.06744	0.988698
aPFL2330w_1	aPFL2330w_1	0.963962	0.963962	0.951	1.20537	0.861731	0.86762	1.01796	0.850174	0.976444	0.993757
aPF13_0016_0	aPF13_0016_0	1.00641	1.00641	1.14755	1.05389	1.09265	0.968692	0.943697	1.01264	1.04689	1.02209
aPF13_0322_0	aPF13_0322_0	0.990372	0.990372	0.988722	1.04415	0.970891	0.911651	0.985983	0.902791	0.973509	1.01299
aPFD0365c_0	aPFD0365c_0	0.882845	0.882845	0.998649	1.07012	1.02652	0.958685	0.948854	1.02279	1.07918	0.961374
aPFF0810c_1	aPFF0810c_1	0.908312	0.908312	0.904343	1.07553	0.858583	0.886633	0.955042	0.891714	0.918719	0.983638
aMAL13P1.114_1	aMAL13P1.114_1	0.979996	0.979996	1.01354	0.971657	0.856483	0.948678	0.984952	0.937869	0.994055	0.908752
aPF11_0053_1	aPF11_0053_1	1.02338	1.02338	0.934124	1.05497	0.999231	0.983703	1.04683	0.925868	1.04395	1.01804
aPFL1950w_1	aPFL1950w_1			1.16046			#N/A	#N/A	#N/A	#N/A	#N/A
bDd2var_133	bDd2var_133	1.05451	1.05451	1.09792	1.15452	1.23749	1.17084	1.08087	1.18526	1.2504	1.00084
aPF13_0229_1	aPF13_0229_1	0.974337	0.974337	1.05325	1.03658	0.998181	0.978699	0.995265	0.977562	0.96079	1.03322
aPFL1165w_1	aPFL1165w_1	0.917744	0.917744	0.984751	1.05064	0.949899	0.89564	0.890066	0.861251	0.897194	1.00894
aPFE0250w_2	aPFE0250w_2	1.01018	1.01018	1.10387	0.867782	1.12413	1.14382	0.975669	1.24249	0.984271	0.953279
aPFL1345c_1	aPFL1345c_1	0.979053	0.979053	1.00957	1.10799	0.869079	0.933667	0.94576	0.90556	0.953941	0.916848
aMAL7P1.202_0	aMAL7P1.202_0	0.99886	0.99886	1.13465	1.07986	1.20495	1.21187	0.970513	1.1788	1.3316	1.12329
aPFI0260c_6	aPFI0260c_6	1.07337	1.07337	0.999642	0.965165	1.02547	0.968692	1.03652	1.0191	1.01069	0.97959
aMAL8P1.74_0	aMAL8P1.74_0	0.923404	0.923404	0.928168	1.03009	0.872228	0.855611	0.998359	0.840943	0.898172	0.983638
aPF10_0105_0	aPF10_0105_0	0.89605	0.89605	0.963905	1.16101	0.831293	0.808578	0.971544	0.826174	1.03711	0.944171
aPF07_0007_0	aPF07_0007_0	1.14317	1.14317	1.02843	0.913227	1.14828	1.27191	1.02621	1.13264	1.04689	1.1071
aPFC0305w_1	aPFC0305w_1	0.927176	0.927176	0.904343	1.11989	0.900567	0.922659	1.00764	0.874175	0.999926	0.933039
aPFF0390w_1	aPFF0390w_1	1.12431	1.12431	1.14954	0.83424	1.29837	1.34796	1.01796	1.2748	1.09777	1.1071
aMAL13P1.332_0	aMAL13P1.332_0	1.00075	1.00075	1.07608	1.01169	1.05381	1.02974	1.05405	1.06341	1.08896	1.01906
aPFI0625c_1	aPFI0625c_1	1.05357	1.05357	1.1406	0.813681	1.36659	1.24889	1.13862	1.32557	1.06939	1.11823
aPF14_0379_3	aPF14_0379_3	1.07243	1.07243	1.12869	0.968411	1.20705	1.17084	1.21701	1.10864	1.17702	1.16175
aPFD0235c_0	aPFD0235c_0	1.05357	1.05357	0.98773	1.10475	1.04331	0.981701	1.06643	0.973869	1.05765	1.02108
aPFL0005w_3	aPFL0005w_3	1.07054	1.07054				0	0	1.07449	0	1.25485
aPFI1210w_1	aPFI1210w_1	0.972451	0.972451	0.897394	1.00304	0.8124	0.933667	0.948854	0.85202	0.897194	0.955303
aPF10_0360_0	aPF10_0360_0	1.05262	1.05262	1.03736	1.08094	0.818697	0.902645	1.05096	0.899098	0.964703	1.00388
aPF11_0410_0	aPF11_0410_0	0.992258	0.992258	1.0056	0.94136	1.15457	1.08177	1.03755	1.07818	0.973509	0.995781
aPF08_0010_0	aPF08_0010_0	1.01207	1.01207	1.04531	1.05389	1.18291	1.06276	0	0	1.07624	1.09293
aPFD0872w_4	aPFD0872w_4	1.07243	1.07243	1.08104	0.972739	1.11574	1.16483	1.10562	1.2628	1.19071	1.08787
aPF10_0267_0	aPF10_0267_0			0.938095	0.947852	1.02757	0.920658	1.00352	0.949869	0.958833	1.099
aPFC0410w_0	aPFC0410w_0	0.940381	0.940381	0.946036	1.1253	0.786159	0.820586	0.962262	0.829866	0.932416	0.898632
aPFD0225w_3	aPFD0225w_3	0.913028	0.913028	0.980781	1.01494	0.856483	0.820586	0.981858	0.823404	0.855122	0.975542
aPFI1590c_0	aPFI1590c_0	1.01301	1.01301	1.04431	1.06471	0.988734	0.996712	1.00764	0.993255	1.03221	1.02918
aPF11_0160_0	aPF11_0160_0	0.946041	0.946041	0.933131	1.00628	0.9457	0.930665	0.899349	0.930484	0.967639	1.0059
aMAL8P1.91_0	aMAL8P1.91_0	0.968678	0.968678	1.03042	1.11124	0.97404	0.941673	0.966387	0.92033	1.10266	0.981614
aPFC0955w_1	aPFC0955w_1	0.930949	0.930949	0.953978	1.06363	0.918411	0.836598	1.00455	0.841866	0.951984	0.976554
aPF11_0400_0	aPF11_0400_0	0.893221	0.893221	0.896402	0.966247	0.934155	0.837598	0.96123	0.806789	0.846317	0.972506
aPFI1730w_0	aPFI1730w_0	0.809275	0.809275	0.753454	1.12098	0.890071	0.941673	0.913788	0.69417	1.01069	0.863213
aPF13_0130_0	aPF13_0130_0	0.969621	0.969621	0.930153	0.873193	1.0769	1.02673	1.00352	1.15941	1.07233	0.915836
aPF14_0737_0	aPF14_0737_0	1.1177	1.1177	1.04034	0.769318	1.26373	1.2589	1.04477	1.30526	0.945135	1.10811
aPF11_0358_0	aPF11_0358_0	1.01867	1.01867	1.08601	0.958672	1.24379	0.988706	1.02827	1.0791	1.05765	1.14353
aPF14_0031_1	aPF14_0031_1	1.0215	1.0215	1.24782	0.953262	1.30152	1.21987	1.16131	1.33295	1.23866	1.15061
aPF07_0017_1	aPF07_0017_1	0.930949	0.930949	0.992693	1.07769	0.996082	0.93767	0.994234	0.9591	0.980358	1.02513
aPFE0355c_1	aPFE0355c_1	1.08186	1.08186	0.910299	0.795287	1.2207	1.31094	0.931321	1.3468	1.00286	0.975542
aPFB0820c_0	aPFB0820c_0	1.11393	1.11393	1.14755	1.10799	0.885873	0.916655	0.934415	0.909253	1.00677	0.96947
aMAL7P1.79_1	aMAL7P1.79_1	0.897937	0.897937	0.913278	1.29735	0.843888	0.813581	0.931321	0.857559	1.03319	0.88244
aPF10_0113_1	aPF10_0113_1	0.958302	0.958302	0.998649	0.93595	1.09789	0.958685	0.985983	1.08095	1.03319	1.09293
aPF14_0087_1	aPF14_0087_1	0.908312	0.908312	0.969861	0.987887	0.933105	0	0.977732	0.948946	0.96666	0.972506
aPF14_0282_3	aPF14_0282_3	1.0413	1.0413	1.07211	0.903489	1.01812	1.17684	1.09531	1.08649	0.993077	0.991734
aPF14_0640_1	aPF14_0640_1	0.972451	0.972451	0.926183	0.95759	0.860682	0.936669	0.976701	0.888021	0.873712	0.998817
aPFI1665w_0	aPFI1665w_0	1.09978	1.09978	1.02744	0.86129	1.32461	1.32595	1.02827	1.22588	1.02732	1.07978
aPFD0940w_2	aPFD0940w_2	1.03659	1.03659	1.18031	0.799615	1.13883	1.2659	0.995265	1.25357	1.05961	1.00489
aMAL7P1.217_0	aMAL7P1.217_0	1.15166	1.15166	1.19024	0.927294	1.06011	1.26891	0	1.23049	1.05472	1.1668
aPFI1580c_0	aPFI1580c_0	0.981883	0.981883	1.03439	0.899161	1.04541	1.04775	0.919976	1.16034	1.08603	1.0059
aPF10_0177_0	aPF10_0177_0	0.954529	0.954529	0.955963	0.968411	1.06746	1.02473	0.974638	0.992331	0.940243	1.08686
aPFL0575w_2	aPFL0575w_2	0.927176	0.927176	0.944051	1.04523	0.886922	0.93767	1.02311	1.00618	0.89328	0.949231
aPFA0330w_2	aPFA0330w_2	1.11582	1.11582	1.12075	1.21728	1.01602	0.935669	1.11593	0.970177	1.10755	0.97959
bHB3vsa_289	bHB3vsa_289	1.04791	1.04791	0.999642	0.875357	1.07165	1.04275	1.07468	1.00895	0.922632	1.04132
aPFB0670c_0	aPFB0670c_0	1.05734	1.05734	1.07906	0.846142	1.26058	1.34396	1.10975	1.26003	1.09777	1.04334
aPF11_0191_1	aPF11_0191_1	1.06583	1.06583	1.10586	0.964082	1.12308	1.17584	1.16131	1.11603	1.13984	1.06156
aPFA0250w_0	aPFA0250w_0	0.959246	0.959246	1.02247	0.913227	1.00763	1.01072	1.02621	1.01633	0.947092	1.02816
aPF14_0664_0	aPF14_0664_0	1.063	1.063	1.0324	0.999789	1.08215	1.04475	1.02414	1.06433	1.07428	1.05954
aPFF0505c_0	aPFF0505c_0	0.996974	0.996974	1.04133	1.24649	0.894269	0.911651	1.03343	0.869559	0.994055	0.980602
aPF14_0274_0	aPF14_0274_0	1.14317	1.14317	1.03637	0.996543	1.03387	0.945676	0.950917	0.9471	0.906978	1.03221
aPFE1415w_0	aPFE1415w_0	1.00075	1.00075	1.04729	0.991133	0.928907	1.14982	0.997328	1.01818	0.98525	0.981614
aMAL13P1.390_0	aMAL13P1.390_0	1.1177	1.1177	1.03141	0.777975	1.31306	1.36898	1.05096	1.28218	1.09679	1.21336
aPF11_0126_0	aPF11_0126_0	0.942268	0.942268	1.02247	1.20429	1.02232	0.843603	0.948854	0.89356	1.02536	0.961374
aPF14_0352_1	aPF14_0352_1	1.10261	1.10261	1.16046	0.963	1.25534	1.14482	1.07159	1.27018	1.15843	1.33277
aPFE0420c_3	aPFE0420c_3	1.03376	1.03376	1.13763	1.00736	0.987685	1.01272	0.971544	1.03202	0.986228	0.993757
aMAL13P1.264_1	aMAL13P1.264_1	1.03376	1.03376	1.21506	0.887259	1.11679	1.04975	1.11387	1.02372	0.967639	1.14454
aPFC0590c_2	aPFC0590c_2	0.914915	0.914915	0.912285	0.950016	1.10839	1.04975	0.921007	1.05233	1.02145	0.982626
aPFE0660c_0	aPFE0660c_0	0.930006	0.930006	0.960927	0.993297	0.941502	0.880629	0.98392	0.888944	0.884474	0.970482
aPFF1125c_1	aPFF1125c_1	0.987542	0.987542	0.982766	0.998707	0.901617	0.974696	0.937509	0.948023	0.928503	1.00691
aPF10_0143_3	aPF10_0143_3	1.12431	1.12431	1.01056	1.08419	0.926807	1.07677	0.990108	0.987716	1.00677	0.952267
aPFD0800c_1	aPFD0800c_1	0.926233	0.926233	0.990708	1.0355	0.943601	0.878628	0.994234	0.98587	1.00286	1.0059
aPFE0325w_0	aPFE0325w_0	1.04508	1.04508	0.930153	1.03874	0.916311	1.00572	0.94576	0.942484	1.0508	0.879405
aMAL13P1.123_2	aMAL13P1.123_2	0.937552	0.937552	0.990708	1.10258	0.904766	0.940672	0.977732	0.924022	0.902086	0.993757
aPF11_0306_0	aPF11_0306_0	0.913028	0.913028	0.937102	1.11016	0.831293	0.8396	0.979795	0.832635	0.951984	0.930003
aPF14_0321_0	aPF14_0321_0	1.06489	1.06489	1.04828	0.93595	1.11889	1.1258	0.966387	1.08464	1.06744	1.04436
aPF13_0327_0	aPF13_0327_0	1.06017	1.06017	0.990708	1.0052	1.03177	1.03774	1.05818	1.03479	0.989163	0.977566
aPFE0075c_1	aPFE0075c_1	0.924347	0.924347	0.929161	1.05173	0.869079	0.934668	0.976701	0.844636	0.937308	0.941135
aPFA0165c_1	aPFA0165c_1	1.09601	1.09601	1.1406	0.824502	1.19551	1.26791	1.04993	1.22588	1.04102	1.08281
aPF11_0507_2	aPF11_0507_2	1.18184	1.18184	1.21803	0.878603	1.10734	1.09378	1.0984	1.12526	1.00971	1.00995
aPFE0465c_4	aPFE0465c_4	0.990372	0.990372	1.05623	1.11665	0.977189	0.953681	0.967419	0.98587	1.02145	0.972506
aPFE1455w_1	aPFE1455w_1	0.983769	0.983769	0.956956	0.954344	0.977189	1.00672	0.947823	0.973869	0.948071	0.910776
aPF14_0371_1	aPF14_0371_1	1.01584	1.01584	0.946036	1.03009	0.958296	1.00372	1.03136	1.03018	1.13299	0.986674
aPFA0615w_0	aPFA0615w_0	1.24504	1.24504	1.12075	0.807189	1.11364	1.09778	1.00352	1.22495	1.03613	1.0059
aPFE0425w_0	aPFE0425w_0	1.19222	1.19222	1.21605	0.882931	1.21125	1.404	1.07777	1.40126	1.04787	1.01602
aPFF0175c_3	aPFF0175c_3	0.9517	0.9517	1.02644	1.26272	0.762018	0.767548	1.00352	0.77448	0.941222	0.856129
aPFI1200w_0	aPFI1200w_0	1.06489	1.06489	1.02347	0.91972	1.30467	1.00072	1.0097	1.12341	0.958833	1.1496
aPFC1120c_1	aPFC1120c_1	0.916801	0.916801	0.92519	0.886177	1.01078	1.01072	0.954011	1.06987	0.988185	0.998817
aPF10_0334_1	aPF10_0334_1	0.965848	0.965848	0.947029	1.03225	1.00028	0.955683	0.917913	0.929561	0.88741	1.01906
aPF11_0288_0	aPF11_0288_0	1.03848	1.03848	1.09494	0.854798	1.23854	1.1158	0.998359	1.06249	0.993077	1.00894
aPFI1550c_0	aPFI1550c_0	0.994144	0.994144	0.978795	0.858044	0.996082	0.928663	0.862219	1.04126	0.933395	0.981614
aPFA0285c_0	aPFA0285c_0	0.932836	0.932836	0.895409	1.01494	0.916311	0.858613	1.03136	0.833558	0.872734	0.986674
aPFE0060w_1	aPFE0060w_1	0.963962	0.963962	1.0195	1.19455	0.894269	0.986705	0.974638	0.94433	0.997969	0.945183
bDd2var_123	bDd2var_123	1.12997	1.12997	1.0185	0.901325	1.03387	1.10579	1.08499	0	1.10951	1.06864
aPF14_0419_2	aPF14_0419_2	1.00263	1.00263	0.943058	0.854798	0.998181	1.00772	1.12109	1.01541	0.983293	1.02007
aMAL13P1.305_0	aMAL13P1.305_0	0.946984	0.946984	0.907321	1.08635	0.849136	0.848606	0.996297	0.865867	0.949049	0.960362
aPF11_0165_0	aPF11_0165_0	0.969621	0.969621	1.04531	1.0474	1.07375	1.04275	1.01177	1.0191	1.00482	0.937087
aMAL8P1.45_1	aMAL8P1.45_1	1.00735	1.00735	1.00461	1.0712	0.989784	0.930665	1.00042	0.894483	0.992099	0.980602
aPFC0060c_0	aPFC0060c_0	1.13657	1.13657	1.05126	0.975985	1.0727	1.08177	1.04271	1.10218	1.12516	1.11216
aPFE0355c_0	aPFE0355c_0	1.05828	1.05828	1.09295	0.885095	0.986635	0.96569	1.02414	0.998793	0.934373	1.04537
aMAL13P1.218_0	aMAL13P1.218_0	0.966791	0.966791	1.00758	1.0712	0.983486	0.874625	1.03343	0.943407	1.06059	1.01703
aPF11_0439_0	aPF11_0439_0	0.970564	0.970564	1.01751	1.14262	0.996082	0.86762	0.959168	0.901868	1.04591	0.934051
ac11rRNA28s_1	ac11rRNA28s_1	1.27616	1.27616	1.09395	0.797451	1.46421	1.35797	1.06643	1.36803	1.07722	1.01197
aPF14_0710_6	aPF14_0710_6	0.960189	0.960189	1.0056	1.11665	0.922609	0.916655	1.05199	0.962792	1.04395	0.95935
aPFF0680c_0	aPFF0680c_0	0.921517	0.921517	0.935117	1.06255	0.879575	0.823588	0.964324	0.898175	0.98525	0.961374
aMAL13P1.81_0	aMAL13P1.81_0	0.947927	0.947927	0.951	1.05714	0.904766	0.863617	1.03961	0.913868	0.951006	1.00995
aPF14_0686_0	aPF14_0686_0	0.92812	0.92812	0.98773	0.851552	0.831293	0.947677	1.12006	0.952638	0.947092	0.920895
aPF10_0211_5	aPF10_0211_5	0.947927	0.947927	1.05424	1.09609	0.987685	1.03474	0.994234	0.927714	1.03711	0.954291
aMAL13P1.135_0	aMAL13P1.135_0	0.972451	0.972451	0.895409	0.928376	1.08215	1.08878	1.03136	1.16772	1.02536	0.941135
aMAL8P1.86_0	aMAL8P1.86_0	1.0215	1.0215	1.0185	0.915391	0.961445	1.00472	1.12419	0.991408	0.840446	0.986674
aPF14_0512_1	aPF14_0512_1	0.94887	0.94887	0.853716	1.01602	0.877476	0.883631	0.934415	0.85202	1.01167	0.896608
aPF10_0157_0	aPF10_0157_0	0.859265	0.859265	0.931146	1.13504	0.879575	0.836598	0.967419	0.775403	0.978401	0.931015
aPF08_0098_0	aPF08_0098_0	0.995088	0.995088	0.880519	0.966247	0.986635	1.04174	0.908631	0.937869	0.990142	0.96947
aPFL2405c_1	aPFL2405c_1	1.15826	1.15826	1.10685	1.08202	1.09579	1.10179	1.09943	1.21018	1.22594	1.09698
aPF14_0031_4	aPF14_0031_4	0.976223	0.976223	0.984751	1.00304	0.993983	1.04675	1.03549	1.02556	0.910891	1.05245
aPF11_0098_0	aPF11_0098_0	0.941325	0.941325	0.982766	0.965165	1.11049	1.00372	1.02414	1.02464	0.997969	1.08686
aMAL13P1.39_3	aMAL13P1.39_3	0.984712	0.984712	0.972839	1.01169	0.879575	0.882631	1.06746	0.889867	0.948071	0.926967
aPFC0790w_1	aPFC0790w_1	0.970564	0.970564	1.0195	1.03009	0.897418	0.940672	1.14894	1.00433	1.02928	0.978578
aPF14_0634_0	aPF14_0634_0	1.00924	1.00924	0.951	0.980313	1.00343	1.04675	0.976701	1.00802	0	1.014
aMAL7P1.134_4	aMAL7P1.134_4	0.969621	0.969621	1.00461	1.11557	1.01078	0.913653	1.00558	0.934176	1.04395	0.977566
aPF11_0083_1	aPF11_0083_1	0.964905	0.964905	0.924197	1.12963	0.861731	0.831594	1.14172	0.847405	0.949049	1.02209
aPFD1045w_1	aPFD1045w_1	1.24127	1.24127	0.92519	0.665444	1.30047	1.76826	1.18091	1.52034	0.951006	1.06156
aPFD1060w_2	aPFD1060w_2	0.996031	0.996031	0.98773	1.03333	0.976139	1.01773	0.999391	1.0191	0.947092	1.04638
aPF13_0013_0	aPF13_0013_0	1.0281	1.0281	1.07806	1.00628	1.00133	1.00872	1.05612	1.06341	1.06744	1.01602
aPFD0535w_0	aPFD0535w_0	1.03282	1.03282	0.999642	0.83965	0.979288	1.06576	0.913788	1.05326	0.897194	0.990722
aPF10_0273_0	aPF10_0273_0	0.926233	0.926233	0.962912	1.14262	0.880624	0.901644	0.931321	0.900022	0.96666	0.968458
aPF07_0015_1	aPF07_0015_1	0.976223	0.976223	1.07509	1.07445	0.94675	0.967691	0.946791	0.958177	1.00775	0.932027
bDd2var_165	bDd2var_165	1.17241	1.17241	1.18925	0.859126	1.38129	1.31594	1.11181	1.26465	1.01558	1.30545
aPF14_0184_1	aPF14_0184_1	1.06771	1.06771	0.964898	0.920802	1.0769	1.24989	1.07468	1.17234	1.01265	1.04942
aPF13_0189_1	aPF13_0189_1	1.02716	1.02716	1.0185	0.939196	0.996082	0.970694	0.936478	0.9591	0.863928	1.07573
aPFL0935c_3	aPFL0935c_3	1.32427	1.32427	1.34411	0.843978	1.14513	1.33996	0	1.3348	0.908935	1.17895
aPFI1085w_2	aPFI1085w_2	0.971507	0.971507	0.971846	1.08527	0.921559	0.868621	0.942666	0.936022	0.988185	0.950243
aPF11_0262_1	aPF11_0262_1	1.01867	1.01867	1.00163	0.912145	1.21335	1.19185	0.98392	1.16957	1.05374	1.09799
aPF14_0530_1	aPF14_0530_1	0.969621	0.969621	0.960927	0.967329	1.03072	1.07377	1.06952	1.03664	1.12907	1.00894
aPF10_0111_0	aPF10_0111_0	1.01112	1.01112	1.00361	1.08311	1.01078	1.00272	1.0458	1.05141	1.08505	1.04031
aMAL13P1.336_1	aMAL13P1.336_1	1.02055	1.02055	0.989715	1.16317	0.870128	0.902645	1.02724	0.89356	1.04591	0.901668
aPF13_0189_0	aPF13_0189_0	0.876243	0.876243	0.958941	1.11773	0.880624	0.829593	0.799306	0.87879	0.909913	0.934051
aPF08_0027_1	aPF08_0027_1	1.08469	1.08469	1.05722	1.0355	1.00868	1.17384	0.933383	1.03479	1.03417	0.933039
aPFF0685c_0	aPFF0685c_0	0.962075	0.962075	0.989715	1.10042	1.02022	0.842602	1.00455	0.915714	1.03515	0.988698
aPFD1025w_0	aPFD1025w_0					0.900567	0	0	0.966485	0	0
bDd2rif_23	bDd2rif_23	1.01961	1.01961	0.94008	0.895915	0.931006	0.985704	0.970513	0.901868	0.815008	1.03727
aMAL13P1.162_0	aMAL13P1.162_0	1.04602	1.04602	1.14259	0.91972	1.09684	1.08978	0.858094	1.12433	1.01362	1.08382
aPF11_0447_0	aPF11_0447_0	1.03942	1.03942	1.0056	0.895915	1.08635	1.13581	0.949885	1.21757	1.15941	1.01906
aPF14_0759_0	aPF14_0759_0	1.06771	1.06771	0.983759	1.1437	0.912113	0.868621	1.02208	0.80125	1.01069	0.991734
aPF08_0099_0	aPF08_0099_0	1.00169	1.00169	1.05225	0.932704	1.15037	1.13681	1.00042	1.11418	1.0782	1.12936
bDd2ste_9	bDd2ste_9	1.07243	1.07243	1.09792	0.982477	0.967742	0.980701	1.05818	0.998793	0.971552	1.01906
aPF11_0526_0	aPF11_0526_0	0.863981	0.863981	0.875555	1.05605	0.871178	0.874625	0.988046	0.832635	0.953941	0.956314
aPF10_0374_8	aPF10_0374_8	1.11393	1.11393	1.04133	0.994379	0.844938	0.922659	1.06952	0.994178	0.91774	0.96947
bDd2var_101	bDd2var_101	1.19128	1.19128	1.13167	0.908899	1.09579	1.18585	1.09428	1.22772	1.0782	1.02108
aPFB0755w_0	aPFB0755w_0	1.05262	1.05262	1.07608	0.965165	0.9457	0.941673	0.936478	1.01541	0.958833	0.968458
aPFI0595c_1	aPFI0595c_1	1.01207	1.01207	0.966883	1.27246	0.891121	0.809578	0.933383	0.80125	1.04689	0.924943
aPF10_0089_1	aPF10_0089_1	1.19128	1.19128	1.12274	0.798533	1.47785	1.32495	1.07055	1.40588	1.04298	1.27913
aPF07_0062_1	aPF07_0062_1	1.06866	1.06866	1.10685	0.911063	1.36974	1.34396	1.05715	1.36526	1.10755	1.16782
aPFE0170c_1	aPFE0170c_1	1.23466	1.23466	1.02744	0.752006	1.58072	1.38199	1.13759	1.56096	1.12614	1.16073
bDd2rif_26	bDd2rif_26	1.04225	1.04225	0.935117	0.888341	0.944651	0.905647	0.957105	0.868636	0.853166	1.00287
aPF08_0095_1	aPF08_0095_1	0.887562	0.887562	0.822942	1.11989	0.859632	0.840601	0.979795	0.861251	1.01949	0.946195
aPFF0200c_0	aPFF0200c_0	1.20259	1.20259	1.17237	0.733612	1.61115	0	1.10046	1.52865	1.1369	1.13645
aPF08_0091_0	aPF08_0091_0	0.930949	0.930949	0.92519	1.10258	0.938353	0.974696	0.984952	0.94433	1.05472	0.994769
aPF07_0043_0	aPF07_0043_0	1.04979	1.04979	1.13862	0.913227	1.30992	1.30793	1.01177	1.29603	1.17017	1.08989
aMAL7P1.122_1	aMAL7P1.122_1	1.07903	1.07903	1.12571	0.887259	1.29522	1.18485	0.866345	1.30434	1.1232	1.01906
aPF10_0083_0	aPF10_0083_0	1.10922	1.10922	0.996664	1.00845	1.01707	1.04174	0.998359	1.0071	1.0283	1.04436
aPF07_0086_1	aPF07_0086_1	1.08847	1.08847	1.17833	0.95218	1.19236	1.30693	0.926164	1.33295	1.19756	0
aPF07_0069_0	aPF07_0069_0	1.01112	1.01112	0.982766	1.13071	0.989784	0.878628	0.925133	0.860328	0.913827	0.995781
aPFF1090c_1	aPFF1090c_1	0.988485	0.988485	0.956956	0.965165	0.933105	0.8396	1.04993	0.844636	0.906978	1.00489
aPFI0165c_1	aPFI0165c_1	0.969621	0.969621	0.996664	0.965165	0.820797	0.930665	1.05715	0.929561	1.02536	0.895596
aPFD0485w_0	aPFD0485w_0	1.04319	1.04319	0.949014	0.984641	0.899517	0.860615	1.02002	0.931407	0.891323	0.942147
aPF14_0155_0	aPF14_0155_0	1.0347	1.0347	0.959934	1.13071	0.965643	0.816583	0.910694	0.844636	0.995034	0.972506
aPF14_0765_0	aPF14_0765_0	1.09224	1.09224	1.03637	0.911063	1.13148	1.05275	1.05818	1.07449	1.042	1.09698
bDd2rif_38	bDd2rif_38	1.19788	1.19788	0.992693	0.872111	1.16297	1.22187	1.08603	1.15387	0.975466	1.14151
aPFI0790w_0	aPFI0790w_0	0.965848	0.965848	0.938095	1.1015	0.917361	0.890636	0.963293	0.853867	0.919697	0.90268
aPF13_0176_0	aPF13_0176_0	1.0979	1.0979	1.12671	0.847224	1.01497	1.1208	1.09531	1.1188	0.956876	1.01906
bHB3vsa_182	bHB3vsa_182	1.08564	1.08564	0.948022	0.967329	0.874327	0.914653	1.09015	0.899098	0.915783	0.995781
aMAL13P1.32_3	aMAL13P1.32_3	0.960189	0.960189	1.04729	0.807189	0.777762	0.963689	0.92307	0.937869	0.931438	0
aPFI0095c_1	aPFI0095c_1	0.960189	0.960189	1.00858	0.971657	1.03282	0.955683	0.966387	0.989562	0.89328	1.0818
aPFL1225c_0	aPFL1225c_0	0.996974	0.996974	1.01056	0.898079	1.02337	1.09879	0.890066	1.00802	1.07526	0.971494
aPFE1555c_3	aPFE1555c_3	0.999804	0.999804	0.959934	1.0355	1.02337	1.04074	1.03136	0.900022	0.804246	0.95935
arps17_0	arps17_0	0.929063	0.929063	1.08501	0.63623	0.797705	0.995711	1.05199	0.91756	0.968617	0
aPF13_0151_0	aPF13_0151_0	1.12902	1.12902	1.26965	1.11124	1.23749	1.26791	1.06746	1.24618	1.26996	1.03221
aPF14_0399_0	aPF14_0399_0	0.929063	0.929063	0.928168	1.18698	0.8124	0.866619	0.988046	0.821558	1.00286	0.949231
aPF10_0131_0	aPF10_0131_0	0.881902	0.881902	0.994678	1.16317	0.923659	1.01372	0.940603	0.978485	1.10364	0.966434
aPF14_0080_0	aPF14_0080_0	0.854549	0.854549	1.10785	1.01927	0.951998	0.950679	1.01589	0	0.906978	0.890536
aPF14_0370_1	aPF14_0370_1	0.971507	0.971507	0.889453	0.95759	0.959345	0.904646	0.933383	0.910176	0.837511	1.02816
aPF11_0289_2	aPF11_0289_2	0.949813	0.949813	0.979788	0.95218	1.04751	1.08077	0.976701	1.02095	0.951984	1.04942
aPFL2465c_0	aPFL2465c_0	1.01207	1.01207	0.94008	1.11665	1.02232	1.02073	0.997328	0.975716	1.0508	1.03424
aPFB0130w_0	aPFB0130w_0	0.990372	0.990372	1.06715	1.05064	0.847037	0.943674	1.06437	0.902791	0.953941	0.900656
aPFF1125c_0	aPFF1125c_0	0.930949	0.930949	0.931146	1.07553	0.842838	0.814582	0.875627	0.842789	0.906978	0.925955
aPFB0435c_1	aPFB0435c_1	0.92529	0.92529	0.931146	1.14262	0.939403	0.922659	0.976701	0.886175	0.971552	0.977566
aMAL7P1.100_1	aMAL7P1.100_1	1.06017	1.06017	1.04431	1.08743	1.0853	1.02473	1.00558	1.09572	1.00188	1.03525
aPF10_0385_0	aPF10_0385_0	1.0913	1.0913	1.02644	0.900243	1.21335	1.07077	1.05921	1.1631	1.15745	1.12734
aPF08_0130_0	aPF08_0130_0	0.966791	0.966791	1.07211	1.11665	0.990834	0.949679	1.00248	0.969254	1.00677	1.00185
aPFL1785c_1	aPFL1785c_1	0.909255	0.909255	0.934124	1.06255	0.841789	0.916655	1.08706	0.884329	0.918719	0.911788
aPF14_0333_0	aPF14_0333_0	1.00829	1.00829	0.951	0.979231	0.926807	0.966691	1.00042	0.974793	0.98525	0.972506
aPFB0540w_1	aPFB0540w_1	1.01112	1.01112	1.00957	1.06796	1.01707	1.04375	0.994234	0.999716	1.05374	1.05448
aPF11_0236_0	aPF11_0236_0	1.06771	1.06771	1.06317	0.840732	1.46946	1.35797	0.976701	1.24526	0.949049	1.0059
bDd2var_124	bDd2var_124	1.12997	1.12997	1.11579	1.0171	1.06011	1.07177	1.14791	1.1428	1.13103	1.05346
aMAL8P1.82_0	aMAL8P1.82_0	1.02716	1.02716	1.05027	1.00412	1.0769	1.07077	0.999391	1.07726	1.04591	0.956314
aPF11_0336_0	aPF11_0336_0	0.997917	0.997917	1.00659	0.969493	1.14513	1.06376	0.950917	1.03756	0.975466	1.13442
aPFC0885c_0	aPFC0885c_0	1.07054	1.07054	0.879526	1.13071	0.863831	0.933667	0.98392	0.864021	0.988185	0.993757
aPFE1255w_1	aPFE1255w_1	1.00075	1.00075	1.01751	1.06255	1.02967	1.02974	1.0293	0.966485	0.984271	1.00185
aPF14_0657_0	aPF14_0657_0	1.11016	1.11016	0.935117	1.07337	0.978238	0.907649	0.976701	0.989562	1.00873	0.994769
aPF14_0056_0	aPF14_0056_0	1.02621	1.02621	1.03836	1.01927	1.00238	1.01272	1.0623	1.02279	1.02732	1.08888
aPF14_0495_1	aPF14_0495_1	1.11393	1.11393	1.06119	0.83424	1.15352	1.29993	1.04374	1.13541	1.04689	0.96947
aPF14_0110_0	aPF14_0110_0	1.00735	1.00735	1.0463	0.964082	0.932055	1.03274	1.07159	0.969254	1.01069	0.970482
aMAL13P1.259_0	aMAL13P1.259_0	0.950757	0.950757	0.93611	1.10583	0.872228	0.88163	0.973607	0.826174	0.951006	0.977566
aPFD0585c_2	aPFD0585c_2	0.956416	0.956416	1.02347	0.997625	0.986635	0.841601	0.962262	0.852943	0.857079	1.00084
aPF08_0005_0	aPF08_0005_0	0.879073	0.879073	0.84776	1.01602	0.794556	0.918656	0.899349	0.80125	0.962747	0.923931
aPF11_0396_1	aPF11_0396_1	1.07337	1.07337	0.961919	1.00087	0.992933	1.19085	0.947823	1.03849	0.940243	1.00894
aPFI1345c_0	aPFI1345c_0	0.94887	0.94887	1.05821	1.01602	1.01288	0.968692	0.976701	1.02833	0.975466	1.014
aPF14_0649_0	aPF14_0649_0	0.927176	0.927176	0.896402	0.969493	0.905815	0.891637	1.02724	0.883406	0.883496	0.96441
aPF14_0402_3	aPF14_0402_3	0.971507	0.971507	0.977803	0.951098	0.845987	0.966691	0.924101	0.903714	0.98525	0.894584
ac11rRNA18s_0	ac11rRNA18s_0	1.17335	1.17335	1.06417	0.832076	1.27633	1.2639	1.05818	1.39573	1.05961	1.11924
aMAL8P1.92_1	aMAL8P1.92_1	1.0564	1.0564	1.15549	1.04632	1.10524	1.03174	0.973607	1.09295	1.11831	1.0231
aPFI0240c_3	aPFI0240c_3	0.957359	0.957359	1.04928	1.05714	1.01917	0.907649	1.03343	0.99787	1.02145	1.11317
bDd2var_45	bDd2var_45	1.05168	1.05168	1.087	0.899161	1.09475	1.05275	1.10975	1.16034	0.988185	1.20931
bDd2var_11	bDd2var_11	1.1526	1.1526	0.989715	1.07445	0.956197	0.894639	1.00558	0.92033	0	1.03221
aPFA0320w_0	aPFA0320w_0	0.984712	0.984712	1.00461	0.994379	0.878525	0.931666	0.994234	0.953561	0.967639	0.977566
aPF14_0088_0	aPF14_0088_0	1.06489	1.06489	1.01255	1.20213	0.993983	0.940672	1.09737	0.897252	1.0919	1.02715
aMAL8P1.33_1	aMAL8P1.33_1	1.00452	1.00452	0.949014	0.994379	0.911063	0.959686	0.899349	0.986793	1.03319	0.980602
aPF14_0360_1	aPF14_0360_1	0.962075	0.962075	0.922212	0.969493	0.844938	0.960686	0.897286	0.921253	0.909913	0.935063
aPFL0105w_1	aPFL0105w_1	0.89888	0.89888	0.824928	1.05281	0.830243	0.902645	0.967419	0.85202	0.988185	0.932027
aPF10_0184_2	aPF10_0184_2	0.943211	0.943211	0.934124	1.09501	0.941502	0.882631	0.937509	0.832635	0.890345	0.977566
aPFF0130c_1	aPFF0130c_1	0.971507	0.971507	0.935117	1.1253	0.928907	0.998714	0.998359	1.00802	1.087	1.07067
aPFL1980c_1	aPFL1980c_1	0.927176	0.927176	0.955963	1.07337	0.86488	0.918656	1.02414	0.913868	1.03417	0.97453
aPFA0655w_0	aPFA0655w_0	1.03187	1.03187	1.02644	0.970575	0.992933	1.13781	1.03136	1.05326	1.03613	0.944171
aMAL13P1.296_4	aMAL13P1.296_4	0.992258	0.992258	0.904343	1.1134	1.00658	1.1178	1.04374	1.04403	1.08505	0.960362
aPFI1400c_0	aPFI1400c_0	0.984712	0.984712	1.03736	0.983559	0.932055	1.17384	0.907599	1.12064	1.1007	0.874345
aPFD0425w_0	aPFD0425w_0	1.0413	1.0413	1.04034	0.821255	1.10419	1.07277	1.02002	1.09018	1.0009	1.04942
aPFL1135c_0	aPFL1135c_0	0.92529	0.92529	0.935117	1.00845	0.849136	1.01172	0.894192	0.891714	1.02439	1.02715
aPFL1580w_1	aPFL1580w_1	0.939438	0.939438	0.973832	0.983559	0.879575	0.915654	0.927195	0.904637	0.996012	0.918871
aPFE1270c_1	aPFE1270c_1	0.844174	0.844174	0.951993	0.912145	1.02022	0.947677	0.939572	0.939715	0.953941	0.896608
aPF08_0107_1	aPF08_0107_1	0.996974	0.996974	0.933131	0.885095	1.03597	1.06276	1.09531	0.98587	1.04689	1.19716
aPF13_0265_0	aPF13_0265_0	1.14789	1.14789	1.04531	0.887259	1.20495	1.21287	0.972575	1.13541	1.11636	1.01804
aMAL13P1.320_1	aMAL13P1.320_1	0.946984	0.946984	0.935117	0.918638	0.882724	0.925661	0.929258	0.833558	0.873712	0.972506
aMAL13P1.460_0	aMAL13P1.460_0	1.12714	1.12714	1.07906	0.867782	1.04751	1.1148	0.989077	1.00895	0.899151	1.03019
ac5rRNA18s_0	ac5rRNA18s_0	1.02338	1.02338	1.14954	1.12639	1.12938	0.950679	1.02002	1.06618	1.09287	1.02918
aPF07_0116_0	aPF07_0116_0	1.17996	1.17996	1.10189	0.680592	1.3477	1.46204	0.969481	1.43727	0.873712	1.15466
aPFL0075w_0	aPFL0075w_0	1.063	1.063	0.961919	0.943524	1.18396	1.1168	0.985983	1.06618	1.01949	1.09091
aPF11_0408_2	aPF11_0408_2	0.939438	0.939438	1.00659	0.954344	0.897418	0.899643	1.02724	0.969254	0.981336	0.985662
aMAL7P1.110_0	aMAL7P1.110_0	0.917744	0.917744	1.03141	1.22593	0.807152	0.753538	0.978763	0.78925	0.884474	0.862201
aMAL8P1.15_0	aMAL8P1.15_0	0.931892	0.931892	0.927175	1.00412	0.844938	0.876626	0.976701	0.845559	0.923611	0.893572
aPF13_0093_0	aPF13_0093_0	0.982826	0.982826	0.926183	0.940278	1.03177	0.971694	1.0128	0.943407	0.971552	1.04031
aPF14_0276_0	aPF14_0276_0	1.05828	1.05828	0.998649	0.871029	1.12204	1.16283	1.10872	1.15387	1.02732	1.20222
aPF14_0621_0	aPF14_0621_0	0.847947	0.847947	0.879526	0.988969	0.860682	0.899643	0.959168	0.836328	0.951006	0.971494
aPFL2270w_0	aPFL2270w_0	0.927176	0.927176	0.889453	1.05064	0.882724	0.810579	0.988046	0.826174	0.914805	0.954291
aMAL8P1.151_1	aMAL8P1.151_1	0.954529	0.954529	1.09295	0.82883	1.18921	1.20686	1.01899	1.14649	0.905021	1.1324
aPFI0035c_0	aPFI0035c_0	1.0762	1.0762	1.0602	0.968411	1.03387	1.03874	1.07571	1.01356	1.0146	1.00995
aPFL0625c_0	aPFL0625c_0	1.01395	1.01395	1.17336	1.08094	1.03807	1.04275	0.933383	1.02649	1.09679	0.994769
aPFL1325c_1	aPFL1325c_1	0.997917	0.997917	1.00758	0.971657	0.977189	1.02974	1.0489	0.963715	0.96666	1.03424
aMAL13P1.256_2	aMAL13P1.256_2	0.947927	0.947927	1.00659	1.07878	0.913162	0.897641	0.984952	0.914791	1.07233	0.948219
aPFL1585c_0	aPFL1585c_0	0.982826	0.982826	0.875555	0.978149	0.896369	0.977699	0.888004	0.93233	0.928503	0.963398
aMAL13P1.45_1	aMAL13P1.45_1	0.977167	0.977167	1.12472	1.07445	1.21965	1.03574	1.01899	1.01079	1.02634	1.01602
aPFE0375w_0	aPFE0375w_0	0.953586	0.953586	0.9917	1.02684	0.951998	0.872623	1.04477	0.956331	0.949049	1.04638
ac7rRNA5.8s_0	ac7rRNA5.8s_0	1.0913	1.0913	1.01552	0.901325	1.09579	1.01873	1.09737	1.0828	0.910891	1.10103
aMAL7P1.95_0	aMAL7P1.95_0	1.01867	1.01867	1.04034	0.94136	1.05066	1.04074	0.975669	1.03479	0.927524	1.04739
bDd2var_6	bDd2var_6	1.08281	1.08281	0.93611	1.05064	0.949899	0.936669	1.1706	0.973869	0.903064	0.945183
aPFE1550w_1	aPFE1550w_1	1.06017	1.06017	1.05821	0.774728	1.20286	1.16183	0.981858	1.15941	0.905021	0.976554
bDd2ste_16	bDd2ste_16	1.11959	1.11959	1.01056	0.990051	0.907914	0.901644	1.03549	0.896329	0.929481	0.978578
aPF10_0299_1	aPF10_0299_1	0.976223	0.976223	1.06317	1.0474	0.83969	0.805576	0.950917	0.886175	0.944157	0.915836
aMAL7P1.50_0	aMAL7P1.50_0			1.35701			#N/A	#N/A	#N/A	#N/A	#N/A
aPF11_0392_4	aPF11_0392_4	0.993201	0.993201	0.946036	0.947852	0.956197	0.966691	0.911725	0.916637	0.881539	0.966434
aPF14_0655_1	aPF14_0655_1	1.07526	1.07526	1.02148	0.950016	1.05696	1.16984	1.16235	1.0551	1.04102	1.01197
aPF13_0204_1	aPF13_0204_1	1.05262	1.05262	1.1009	0.898079	1.15352	1.15883	0.848812	1.11787	1.00677	1.00995
aPFD0207c_1	aPFD0207c_1	1.01961	1.01961	1.0195	1.00195	1.15037	1.00772	0.902443	1.05141	0.949049	1.08079
aPFC0875w_2	aPFC0875w_2	0.967735	0.967735	0.963905	0.904571	1.05696	1.09578	1.0458	1.11603	1.03319	0.953279
aPF13_0067_0	aPF13_0067_0	0.946984	0.946984	0.935117	0.983559	0.852285	0.980701	0.919976	0	0.91774	0.940123
aPF08_0123_0	aPF08_0123_0	1.0564	1.0564	1.02644	0.884013	1.19026	1.18184	0.98392	1.21849	1.00286	1.11115
aPF13_0158_0	aPF13_0158_0	0.909255	0.909255	0.907321	1.06255	0.943601	0.931666	0.936478	0.900022	0.973509	0.926967
aPFL1165w_0	aPFL1165w_0	0.887562	0.887562		1.19347	1.17452	0	1.13966	1.08187	1.16038	1.07978
aPFE1370w_0	aPFE1370w_0	0.985655	0.985655	1.00957	1.01277	0.891121	0.868621	0.955042	0.829866	0.877626	0.991734
aPFE0385w_1	aPFE0385w_1	1.00263	1.00263	0.986737	0.956508	1.02232	0.968692	0.982889	0.994178	0.898172	1.05852
aPF08_0068_1	aPF08_0068_1	1.0347	1.0347	1.08501	1.0593	1.04961	0.966691	0.974638	1.02556	0.968617	1.06662
aPFL1725w_1	aPFL1725w_1	1.08941	1.08941	1.06715	0.905653	1.16087	1.21787	1.10975	1.14834	0.971552	1.06864
aPF14_0262_0	aPF14_0262_0	0.917744	0.917744	0.839818	1.24108	0.836541	0.840601	0.879753	0.776326	0.958833	0.940123
aPFA0350w_1	aPFA0350w_1	0.982826	0.982826	0.94008	0.988969	0.937304	0.925661	1.04683	0.953561	0.925567	0.987686
aMAL7P1.146_2	aMAL7P1.146_2	1.01207	1.01207	1.11281	1.03225	1.07375	0.988706	1.13244	1.10864	1.09679	1.08585
aMAL8P1.98_1	aMAL8P1.98_1	0.927176	0.927176	0.941073	0.985723	0.918411	0.924661	0.950917	0.939715	0.956876	0.997805
aPFF0600w_0	aPFF0600w_0	0.977167	0.977167	0.951993	1.03441	1.03387	1.03074	0.96123	0.999716	1.04493	0.97959
aPF11_0148_0	aPF11_0148_0	0.930949	0.930949	0.933131	0.95218	1.09684	0.894639	0.964324	0.87879	0.925567	1.03322
aPF14_0212_0	aPF14_0212_0	0.947927	0.947927	1.03637	1.06471	0.907914	1.00972	0.886972	0.942484	0.970574	0.942147
aPF13_0271_1	aPF13_0271_1	0.908312	0.908312	0.963905	1.10042	0.957246	0.89564	0.944729	0.935099	1.05178	0.977566
aPF14_0668_0	aPF14_0668_0	0.973394	0.973394	0.942066	1.08743	0.898468	1.01372	0.989077	0.956331	1.00873	0.995781
aPF14_0430_1	aPF14_0430_1	1.04602	1.04602	0.94008	1.01061	0.910014	1.05375	1.04271	0.945253	1.01949	1.02209
aPFC0380w_1	aPFC0380w_1	0.97811	0.97811	0.926183	1.07337	0.887972	0.904646	1.01796	0.908329	0.997969	1.0059
aPFI0330c_1	aPFI0330c_1	0.891334	0.891334	0.917248	0.992215	1.01288	1.02173	0.926164	0.906483	0.957855	0.993757
aPF14_0520_0	aPF14_0520_0	1.08469	1.08469		0.825584	1.03702	1.24989	0.792087	1.18157	0.927524	0.936075
aPFD0875c_0	aPFD0875c_0	0.947927	0.947927	1.04828	1.14803	1.06851	0.927663	1.00352	0.995101	1.06352	1.04537
aPF07_0118_1	aPF07_0118_1	0.893221	0.893221	0.981773	0.906735	0.879575	0.917656	0.935446	0.938792	0.864906	0.880417
aPFD0260c_0	aPFD0260c_0	1.11959	1.11959	1.03637	0.912145	1.02652	1.03974	1.03549	1.08464	0.945135	0.972506
aPF11_0176_0	aPF11_0176_0	1.03187	1.03187	1.03637	0.992215	0.889021	0	1.01899	0.938792	0.952963	0.98465
aPF11_0226_2	aPF11_0226_2	0.888505	0.888505	0.942066	1.0593	0.995032	0.840601	0.919976	0.807712	0.865885	0.985662
aPFL1320w_1	aPFL1320w_1	1.00829	1.00829	1.07906	0.975985	1.14093	1.10079	0	1.29511	1.20637	1.02108
aPF07_0106_1	aPF07_0106_1	0.933779	0.933779	1.03042	1.0355	0.953048	0.948678	0.993203	0.963715	0.927524	0.985662
aPFL1310c_1	aPFL1310c_1	1.1394	1.1394	1.16145	1.13937	1.2186	1.14382	1.04168	1.1068	1.15451	1.07168
aPFI0395w_2	aPFI0395w_2	1.04696	1.04696	1.10387	0.867782	1.03492	1.21287	1.0097	1.07079	0	1.04537
aPFL1280w_0	aPFL1280w_0	1.00452	1.00452	0.975817	1.03009	1.00658	1.00272	0.995265	1.00249	0.999926	1.05852
aPF10_0161_1	aPF10_0161_1	1.00169	1.00169	1.07012	1.08852	0.993983	0.968692	0.996297	0.913868	0.998947	1.00793
aMAL13P1.296_0	aMAL13P1.296_0	0.89605	0.89605	0.933131	1.09068	0.924708	0.878628	0.952979	0.927714	1.03613	0.888512
aPF10_0188_1	aPF10_0188_1	1.09412	1.09412		0.841814	1.4873	1.29493	1.17266	1.54527	1.29149	1.18907
aPFL0330c_0	aPFL0330c_0	0.979053	0.979053	0.877541	0.921884	0.824995	0.955683	0.901411	0.874175	0.919697	0.878393
aMAL13P1.163_0	aMAL13P1.163_0	1.0149	1.0149	1.05722	1.1134	1.05906	0.898642	0.992171	0.968331	0.956876	1.04436
aPF10_0242_1	aPF10_0242_1	1.10073	1.10073	1.0731	1.1859	0.92051	0.92366	0.952979	0.900022	0.976444	0.965422
aPFI0120c_1	aPFI0120c_1	1.05451	1.05451	1.00361	1.03982	1.0853	0.939671	1.04065	1.00156	1.08994	1.0818
aPFF1295w_0	aPFF1295w_0	0.953586	0.953586	0.883497	0.978149	0.938353	0.877627	0.972575	0.888021	0.899151	0.975542
bDd2var_8	bDd2var_8	1.00358	1.00358	0.949014	0.93054	0.912113	0.998714	1.02208	0.923099	0.903064	1.00084
aPFA0665w_0	aPFA0665w_0	1.04508	1.04508	1.08005	0.849388	1.26058	1.16183	1.10562	1.23695	1.09874	1.03727
aPFD0165w_0	aPFD0165w_0	0.847947	0.847947	1.00659	1.03766		0.882631	0.943697	0.912945	0.964703	0.994769
aPF14_0245_1	aPF14_0245_1	1.04036	1.04036	1.0185	0.973821	0.913162	1.03374	0.979795	0.9711	1.00971	0.926967
aPFL0220c_0	aPFL0220c_0	0.930949	0.930949	0.906329	1.04632	0.993983	0.880629	1.04065	0.924022	0.992099	1.05954
aMAL7P1.35_1	aMAL7P1.35_1	1.03187	1.03187	0.913278	0.847224	0.91946	0.988706	0.905537	0.961869	0.923611	0.927979
aPF11_0128_0	aPF11_0128_0	1.06677	1.06677	1.08104	0.914309	1.33406	1.35397	1.07984	1.36526	1.17115	1.08686
aPF11_0407_1	aPF11_0407_1	0.952643	0.952643	0.966883	0.991133	0.964593	1.00672	1.08087	0.9471	0.998947	0.96441
aPFE1275c_1	aPFE1275c_1	0.956416	0.956416	0.886475	0.975985	0.881674	0.904646	1.04477	0.913868	0.878604	0.932027
aPFI0975c_5	aPFI0975c_5	1.1526	1.1526	1.09196	0.953262	0.996082	1.20786	0.94576	1.07356	1.0058	1.05954
aPF14_0611_1	aPF14_0611_1	0.89605	0.89605	0.909307	1.05389	0.86593	1.00472	0.992171	0.942484	1.05472	0.941135
aPFI0405w_0	aPFI0405w_0	0.936608	0.936608	0.972839	0.987887	0.935204	0.997713	1.06127	0.922176	0.9422	1.04537
aPFB0932w_0	aPFB0932w_0	0.964905	0.964905	0.949014	1.15776	0.845987	0.896641	1.03549	0.81602	0.975466	0.927979
aPFC0840w_0	aPFC0840w_0	1.03565	1.03565	1.0463	0.902407	1.17766	1.15282	1.10665	1.1308	0.992099	1.01804
aPF14_0771_0	aPF14_0771_0			1.59923			#N/A	#N/A	#N/A	#N/A	#N/A
bDd2ste_3	bDd2ste_3	1.10544	1.10544	0.98773	1.029	0.917361	0.903646	1.07674	0.955407	0.988185	0.992746
aPF13_0184_0	aPF13_0184_0	0.940381	0.940381	0.92519	0.823419	1.0811	0.968692	0.978763	0.976639	0.910891	1.05043
aPFC0140c_0	aPFC0140c_0	0.943211	0.943211	0.919234	1.12855	0.936254	0.908649	1.04374	0.976639	1.06352	0.98971
aPFE1270c_2	aPFE1270c_2	0.992258	0.992258	0.945044	1.20213	0.964593	0.877627	0.965356	0.938792	0.969595	1.0393
aPFE0570w_12	aPFE0570w_12	0.892278	0.892278	0.93611	1.08527	0.800854	1.01973	0.896254	0.940638	1.02243	0.819698
bDd2var_52	bDd2var_52	1.20542	1.20542	1.06417	0.879685	1.12728	1.18184	1.10562	1.28403	1.06352	1.10204
aPF14_0569_1	aPF14_0569_1	0.960189	0.960189	1.01056	1.15776	0.797705	0.902645	1.04271	0.804942	0.929481	0.908752
aPF14_0074_1	aPF14_0074_1	0.936608	0.936608	0.911292	0.954344	1.01497	0.986705	0.980826	0.954484	0.905999	0.988698
aMAL13P1.298_1	aMAL13P1.298_1	0.958302	0.958302	0.96589	0.83424	1.00238	1.09979	0.879753	1.07541	0.948071	0.905716
aPF14_0095_1	aPF14_0095_1	1.12053	1.12053	0.968868	0.91972	1.10839	1.21687	1.00867	1.12341	0.988185	1.08787
aPF11_0390_0	aPF11_0390_0	0.999804	0.999804	0.996664	0.678428	1.12833	1.13981	0.908631	1.13726	0.861971	1.07876
aPF14_0545_0	aPF14_0545_0	0.92812	0.92812	0.972839	1.09176	1.07375	0.977699	0.912756	0.888944	0.997969	1.04537
aPF14_0722_7	aPF14_0722_7	0.957359	0.957359	0.968868	1.1318	0.86488	0.894639	0.993203	0.948946	1.0009	0.939111
aPFL1400c_0	aPFL1400c_0	1.10356	1.10356	1.05623	0.723873	0.897418	1.04275	0.910694	1.15018	0.890345	0.906728
aMAL7P1.127_1	aMAL7P1.127_1	0.939438	0.939438	0.989715	1.10366	0.879575	0.946676	0.993203	0.924945	0.941222	0.988698
aMAL13P1.137_5	aMAL13P1.137_5	0.957359	0.957359	0.98773	1.01169	1.05381	1.02773	0.973607	1.07541	1.06059	0.9128
aPFD0320c_1	aPFD0320c_1	0.939438	0.939438	0.958941	1.00195	0.965643	1.07377	1.05405	1.02095	1.03711	0.935063
aPF14_0030_0	aPF14_0030_0	0.995088	0.995088	0.910299	0.958672	1.04961	1.09078	0.99114	1.08741	1.05863	0.981614
bDd2var_18	bDd2var_18	1.12525	1.12525	1.05225	0.905653	1.11049	1.32795	0.971544	1.3348	1.09972	1.03221
aPFB0765w_2	aPFB0765w_2	0.967735	0.967735	1.00957	0.967329	1.05276	1.04375	0.933383	1.0671	1.0009	1.0484
aPF14_0613_1	aPF14_0613_1	0.966791	0.966791	0.952985	1.11232	0.966693	0.976698	1.02827	0.964638	1.13397	1.01197
bDd2rif_67	bDd2rif_67	0.954529	0.954529	0.889453	0.833158	0.949899	0.986705	1.04168	0.984024	0.877626	1.06763
aPFC0405c_1	aPFC0405c_1	1.05357	1.05357	1.1138	0.987887	0.961445	1.12681	1.03549	1.05879	1.05472	0.850057
aPFF0130c_0	aPFF0130c_0	0.968678	0.968678	1.02942	1.02792	1.11049	1.01873	1.04271	0.996947	0.996991	1.01096
aPFE1300w_0	aPFE1300w_0	1.00829	1.00829	0.981773	0.758498	1.11679	1.2649	1.04477	1.30249	1.03026	1.08281
aPFB0275w_1	aPFB0275w_1	1.00263	1.00263	1.02247	1.23134	1.02232	0.850608	1.03136	0.988639	1.03613	1.07067
aPF14_0504_0	aPF14_0504_0	0.881902	0.881902	0.955963	1.01277	0.906865	0.987706	0.960199	0.910176	1.02047	0.913812
aPFE0325w_4	aPFE0325w_4	1.08941	1.08941	1.19818	1.01277	1.20076	1.09578	0.990108	1.15203	1.09385	1.07775
aPFC1010w_1	aPFC1010w_1	0.943211	0.943211	0.929161	1.13612	0.840739	0.892638	1.03136	0.882483	1.03906	0.890536
aMAL7P1.3_0	aMAL7P1.3_0	1.01301	1.01301	0.998649	0.965165	0.89322	0.905647	1.06437	0.935099	0.905021	1.00894
aPFB1055c_0	aPFB1055c_0	0.982826	0.982826	1.087	1.02035	1.17137	1.02974	0.895223	1.20372	1.02439	1.0646
aPF10_0068_0	aPF10_0068_0	1.16487	1.16487	1.00163	0.912145	0.97404	1.12681	0.943697	1.07079	1.05374	1.00894
aPF14_0420_0	aPF14_0420_0	1.12148	1.12148	1.02049	0.745514	1.26058	1.31994	0.87047	1.2868	0.972531	1.014
aPFA0077w_0	aPFA0077w_0	1.35256	1.35256	1.04531	0.812599	1.2207	1.09378	1.16853	1.12803	0.99112	1.14555
aPFA0005w_2	aPFA0005w_2			1.358			#N/A	#N/A	#N/A	#N/A	#N/A
aPF07_0028_0	aPF07_0028_0	1.01112	1.01112	1.14358	0.869947	0.841789	0.930665	0.96845	1.02187	0.982315	0.910776
aMAL13P1.32_5	aMAL13P1.32_5	0.99886	0.99886	0.947029	0.971657	1.01078	1.02673	1.06437	1.0431	1.03026	0.991734
aPF14_0506_1	aPF14_0506_1	0.852663	0.852663	0.867614	1.08635	0.831293	0.776555	1.00661	0.828943	0.938287	0.945183
aPFC0845c_0	aPFC0845c_0	0.979053	0.979053	0.958941	1.07769	0.906865	0.856612	0.922039	0.874175	0.934373	1.0231
aPF11_0312_0	aPF11_0312_0			1.0324	0.973821	1.10419	1.06676	0	1.09849	0	0
bHB3vsa_216	bHB3vsa_216	1.26579	1.26579	1.04531	0.851552	1.07375	1.30393	0	1.1788	0	1.09495
aPF08_0012_3	aPF08_0012_3	0.973394	0.973394	0.908314	1.15344	0.829194	0.788563	0.979795	0.80125	0.988185	0.978578
aMAL13P1.485_0	aMAL13P1.485_0	0.918687	0.918687	0.898387	1.09717	0.790358	0.903646	0.970513	0.844636	0.918719	0.931015
aPF11_0200_0	aPF11_0200_0	1.09412	1.09412	1.04133	0.94136	1.08635	1.2599	1.00352	1.18064	1.05569	0.963398
aPF08_0031_0	aPF08_0031_0	1.02904	1.02904	0.951	0.887259	1.14723	1.2559	0.957105	1.07633	1.10657	1.04638
aPFL0300c_0	aPFL0300c_0	1.04508	1.04508	1.04034	1.09934	0.907914	0.969693	1.07571	0.898175	0.949049	0.986674
aPF10_0362_3	aPF10_0362_3	0.997917	0.997917	1.06615	1.12314	0.847037	0.865618	0.981858	0.908329	0	0.930003
aPFE0620c_1	aPFE0620c_1	0.8753	0.8753	0.901365	0.920802	0.912113	0.844603	0.93854	0.861251	0.860993	0.941135
aPFE1480c_1	aPFE1480c_1	1.06583	1.06583	0.948022	1.03333	0.957246	0.942674	1.08087	0.921253	1.0058	1.02816
aPFF0285c_3	aPFF0285c_3	0.994144	0.994144	1.15252	0.959754	1.01602	0.99371	0.916882	0.995101	0.899151	0.923931
aPFF0895w_0	aPFF0895w_0	0.911142	0.911142	0.924197	1.0896	0.983486	0.868621	0.914819	0.800327	0.999926	0.963398
aPFC0335c_1	aPFC0335c_1	1.12336	1.12336	1.02347	0.937032	1.0769	1.08978	0.985983	1.18249	1.0058	1.00185
aMAL13P1.244_0	aMAL13P1.244_0	1.00358	1.00358	1.00858	1.03117	1.09475	1.05976	0.979795	1.0191	1.07526	1.04942
aPF10_0140_0	aPF10_0140_0	0.938495	0.938495	0.970854	1.01494	0.964593	1.01072	0.990108	1.02741	0.958833	0.987686
aPFD0350w_0	aPFD0350w_0	0.877186	0.877186	0.889453	0.812599	0.840739	0.876626	0.883878	0.954484	0.881539	0.827794
aPF14_0639_0	aPF14_0639_0	1.10544	1.10544	1.01155	0.978149	1.14618	1.02373	1.10665	0.964638	0.993077	1.02513
aPF11_0422_1	aPF11_0422_1	0.860208	0.860208	0.937102	0.907817	0.911063	0.919657	1.09118	0.867713	0.848274	0.981614
[truncated: 7,979 more rows]
